# Supplementary material for: Extracellular LGALS3BP regulates neural progenitor position and relates to human cortical complexity
Source: Nat Commun. 2021 Nov 2;12:6298. doi: 10.1038/s41467-021-26447-w (PMC8564519; doi:10.1038/s41467-021-26447-w)
Supplement: Supplementary file 5 — Supplementary Data 1. [file 41467_2021_26447_MOESM5_ESM.xlsx]

## Sheet: quality control metrics
information on the quality control (QC) metrics of each sequenced sc RNA-seq sample
Information on quality control metric per sequenced library
Quality control metrics	Control		Y366Lfs		E370K
	Replicate 1 (409B2)	Replicate 1 (H9)	Replicate 1	Replicate 2	Replicate 1	Replicate 2
Number of reads	298,749,558	288,331,362	109,613,080	94,774,019	189,628,757	105,955,681
The percentage of R1 bases at or above Q30	94	95	96	96	94	96
The percentage of R2 bases at or above Q30	79	80	90	88	87	89
Number of cells targeted/recovered	6,000/6,394	6,000/5,932	6,000/3,505	6,000/4,399	6,000/4,038	6,000/3,276

## Sheet: detected genes - transcripts 
distribution of detected gene number and transcript number (UMI number) in the six samples
	median nGene	mean nGene	median nUMI	mean nUMI
ctrl1	2275	2370838	6150.5	6845765
ctrl2	2377	2476271	6472	7317351
Y366Lfs1	2425.5	2555179	6510	7416655
Y366Lfs2	1540	1687564	3627.5	4259764
E370K1	2827	2970592	8809	10117776
E370K2	2313	2597028	6494	8849759

## Sheet: differentially expressed genes
Differentially expressed genes in mutant COs - single-cell-RNA sequencing
RG					IP					N
	log2fc	p	p.adj			log2fc	p	p.adj			log2fc	p	p.adj
CHCHD2	2.441	0	0		CHCHD2	2.33738	0	0		CHCHD2	2.42931	0	0
UBB	1.85955	0	0		UBB	1.62976	4.17245e-187	5.34449e-183		UBB	1.79951	8.257e-240	1.05723e-235
HMGCS1	1.42506	3.47722e-274	4.45293e-270		MT-CO1	1.48324	2.445e-174	3.1318e-170		JUN	1.68041	2.81991e-223	3.61062e-219
FGFBP3	1.403	2.02184e-234	2.58916e-230		HMGCS1	1.28094	6.20723e-149	7.95084e-145		HMGCS1	1.49216	7.83314e-231	1.00295e-226
MSMO1	1.17863	5.78424e-236	7.40729e-232		MT-CO3	0.997706	8.84043e-61	1.13237e-56		LMO3	1.34002	5.64946e-148	7.23357e-144
MT-CO1	1.14674	5.58469e-283	7.15176e-279		FGFBP3	0.988987	7.44442e-113	9.53556e-109		DCX	1.28727	1.13449e-292	1.4526e-288
STMN4	0.924358	4.23142e-166	5.41876e-162		MT-CO2	0.952679	8.68581e-48	1.11257e-43		USP11	1.16816	1.07787e-227	1.3801e-223
FDFT1	0.778441	5.08234e-135	6.50844e-131		MSMO1	0.939992	1.18392e-97	1.51649e-93		MSMO1	1.16543	2.38465e-182	3.05331e-178
JUN	0.772333	5.22022e-97	6.68501e-93		MT-ATP6	0.917514	8.06504e-40	1.03305e-35		SCG5	1.15845	1.99641e-205	2.5562e-201
IDI1	0.747094	2.37602e-107	3.04273e-103		MT-ND3	0.87995	1.67044e-61	2.13967e-57		PAK3	1.06716	6.3578e-183	8.14053e-179
SQLE	0.737017	3.14364e-115	4.02575e-111		SOX11	0.861836	1.78118e-55	2.28151e-51		OCIAD2	1.01613	2.58427e-176	3.30889e-172
PTN	0.736272	1.86733e-47	2.3913e-43		DCX	0.841832	3.08175e-71	3.94741e-67		TSC22D1	0.968265	1.33925e-143	1.71477e-139
SCD	0.727447	2.1042e-132	2.69463e-128		STMN4	0.795964	1.2017e-58	1.53926e-54		DNAJB1	0.922702	8.88474e-172	1.1376e-167
FDPS	0.709248	1.56179e-110	2.00003e-106		USP11	0.772527	7.10716e-99	9.10356e-95		SQLE	0.90422	3.23485e-120	4.1419e-116
USP11	0.677216	1.582e-135	2.02591e-131		JUN	0.770111	9.50715e-56	1.21777e-51		KLF6	0.888881	1.87916e-154	2.40607e-150
HSPA5	0.674803	2.45472e-102	3.14351e-98		NR2F1	0.769225	2.90997e-75	3.72738e-71		NR2F1	0.864005	2.69092e-112	3.44546e-108
INSIG1	0.668397	5.36293e-131	6.86776e-127		TMSB4X	0.769164	5.48724e-72	7.02861e-68		BTG1	0.830036	9.52923e-76	1.22012e-71
RPL36A	0.659672	3.28345e-110	4.20479e-106		RPL36A	0.761711	9.81003e-78	1.25657e-73		SOX11	0.819618	2.80193e-56	3.5876e-52
MT-ND3	0.633017	3.87662e-100	4.9644e-96		RPS10	0.738932	2.09843e-84	2.68788e-80		RAB33A	0.791273	1.11497e-114	1.42761e-110
RPS10	0.622573	1.58036e-114	2.0238e-110		OCIAD2	0.732585	7.22335e-105	9.25238e-101		STMN4	0.785059	6.34211e-90	8.12043e-86
RBBP7	0.596243	4.66556e-97	5.97471e-93		FDFT1	0.727609	4.41577e-67	5.65615e-63		MORF4L2	0.739906	4.83307e-116	6.18827e-112
TKT	0.586062	5.48363e-92	7.02234e-88		SQLE	0.725334	2.36e-61	3.02293e-57		MAP1LC3A	0.72431	5.80404e-90	7.43149e-86
MORF4L2	0.583886	1.11292e-71	1.4252e-67		MT-ND4	0.712316	7.34619e-28	9.40973e-24		DUSP1	0.718102	1.59301e-81	2.03969e-77
MT-CO3	0.581744	8.17651e-66	1.04708e-61		PAK3	0.69703	1.68424e-90	2.15734e-86		FDFT1	0.717976	9.49145e-95	1.21528e-90
MGST3	0.570127	8.15452e-77	1.04427e-72		FDPS	0.691686	3.26835e-61	4.18642e-57		FDPS	0.710318	3.12704e-78	4.00386e-74
PLP1	0.555532	4.57601e-148	5.86004e-144		PTN	0.682639	3.42914e-50	4.39239e-46		IDI1	0.700943	9.6708e-77	1.23825e-72
EIF2S3	0.551694	8.89761e-98	1.13943e-93		ACAT2	0.67206	1.10661e-50	1.41745e-46		TMEM97	0.680083	6.51752e-87	8.34504e-83
GPM6B	0.543786	2.95537e-58	3.78464e-54		RPS21	0.664046	2.47725e-86	3.17311e-82		ACAT2	0.679785	1.52254e-58	1.94946e-54
RPS21	0.543125	4.52034e-101	5.78875e-97		UBA1	0.628789	2.93073e-93	3.75397e-89		RHOB	0.675673	3.19852e-91	4.09538e-87
MT-CO2	0.534119	3.92288e-59	5.02363e-55		HEY1	0.625786	1.91681e-48	2.45525e-44		UBA1	0.673605	3.35025e-100	4.28966e-96
DHCR7	0.533213	9.97665e-92	1.27761e-87		HSPA5	0.621125	4.36724e-56	5.594e-52		INSIG1	0.671556	1.46398e-91	1.87448e-87
EFNB1	0.532925	1.57594e-69	2.01814e-65		TMEM97	0.61642	1.24097e-54	1.58956e-50		MVD	0.667989	1.38153e-79	1.76891e-75
UBA1	0.532185	3.9545e-111	5.06414e-107		HES1	0.615798	3.17864e-29	4.07152e-25		MT-CO1	0.667928	3.23657e-77	4.14411e-73
IGFBP2	0.524172	1.42987e-38	1.83109e-34		FJX1	0.61343	2.37231e-50	3.0387e-46		VCAN	0.652423	3.18939e-80	4.08369e-76
MAP3K13	0.516134	4.02235e-173	5.15102e-169		SRSF3	0.596614	6.82308e-41	8.73969e-37		PTN	0.645798	1.24835e-48	1.59839e-44
WBP5	0.514715	3.27637e-64	4.19572e-60		HNRNPA1	0.589728	4.10637e-70	5.25985e-66		HMGB3	0.631922	1.4467e-74	1.85236e-70
RPL38	0.512331	3.05226e-112	3.90873e-108		IDI1	0.582788	6.21693e-42	7.96327e-38		NAP1L3	0.621745	7.13537e-89	9.13613e-85
ACAT2	0.496763	2.8342e-46	3.62948e-42		MARCKS	0.580872	4.64179e-41	5.94567e-37		RPL36A	0.60591	5.90673e-67	7.56297e-63
FJX1	0.495812	1.05041e-62	1.34515e-58		MT-ND1	0.577331	3.60097e-15	4.61249e-11		PJA1	0.599551	2.67057e-83	3.4194e-79
NDN	0.490283	4.28248e-55	5.48414e-51		CCND2	0.569392	1.50863e-46	1.9324e-42		TCEAL7	0.598762	6.12055e-51	7.83675e-47
PRDX4	0.486679	2.88054e-64	3.68882e-60		FAM215B	0.567809	2.19908e-97	2.8168e-93		DHCR7	0.591351	2.19031e-76	2.80447e-72
RPL37A	0.485824	2.26749e-165	2.90374e-161		EFNB1	0.566631	1.25252e-72	1.60435e-68		AP1S2	0.583621	1.65597e-57	2.1203e-53
RPL41	0.481548	4.81363e-167	6.16433e-163		INSIG1	0.563896	7.14777e-65	9.15558e-61		HSPA5	0.576586	5.51432e-66	7.06053e-62
MT-ND5	0.477808	3.19912e-40	4.0968e-36		HES6	0.557605	8.28551e-20	1.06129e-15		ARPP21	0.569099	3.38754e-67	4.3374e-63
SCRG1	0.471375	3.44442e-96	4.41092e-92		SOX2	0.556587	1.53943e-31	1.97186e-27		TMEM35	0.564999	9.71799e-54	1.24429e-49
MT-ATP6	0.462438	1.03494e-32	1.32534e-28		RBBP7	0.556193	1.99089e-63	2.55013e-59		FOS	0.554757	6.72527e-111	8.61104e-107
PEA15	0.447644	1.16602e-42	1.49321e-38		TSC22D1	0.548114	6.73271e-38	8.62392e-34		MAP3K13	0.553235	3.90244e-139	4.99668e-135
HES1	0.447421	1.80839e-38	2.31582e-34		SCD	0.540671	6.04492e-61	7.74294e-57		TUBB2B	0.546755	5.52576e-169	7.07518e-165
CCND2	0.443073	7.89108e-47	1.01053e-42		TUBB	0.539891	2.46027e-44	3.15136e-40		NR2F2	0.545341	1.13532e-66	1.45366e-62
CXCR4	0.441695	3.21229e-47	4.11366e-43		DDX5	0.532384	2.60243e-54	3.33345e-50		MEIS2	0.543092	9.3934e-40	1.20273e-35
SYT1	0.435254	3.3902e-65	4.34149e-61		HMGB3	0.532292	1.15215e-34	1.47579e-30		FJX1	0.542743	1.29767e-44	1.66154e-40
TMEM97	0.434331	8.8339e-47	1.13127e-42		DNAJB1	0.530225	1.68199e-72	2.15446e-68		RP11-397G17.1	0.540255	2.08846e-76	2.67407e-72
CDK16	0.429529	8.71208e-76	1.11567e-71		KPNA2	0.51397	8.91368e-38	1.14175e-33		WBP5	0.534188	9.34635e-52	1.19671e-47
FAM215B	0.429212	3.92522e-79	5.02664e-75		GPM6B	0.506004	1.16804e-37	1.49614e-33		HMGCR	0.53268	1.71843e-67	2.20028e-63
RPL17	0.428689	1.14793e-48	1.47004e-44		TUBB2B	0.505507	1.37022e-26	1.75511e-22		TAF1D	0.523447	3.08878e-54	3.95488e-50
MT-ND4	0.427126	3.80743e-35	4.8758e-31		DHCR7	0.497076	1.20487e-64	1.54332e-60		HERPUD1	0.52218	5.70242e-62	7.30138e-58
TXNIP	0.423569	9.47481e-40	1.21334e-35		ACTG1	0.496602	6.45782e-74	8.27182e-70		ENC1	0.521445	6.20427e-34	7.94394e-30
MAGED1	0.416612	8.07838e-51	1.03452e-46		TKT	0.496385	4.11434e-35	5.27005e-31		FAM215B	0.502436	3.94157e-81	5.04678e-77
NR2F1	0.414775	2.13432e-42	2.73321e-38		MT-ND5	0.489474	1.73935e-23	2.22793e-19		CLK1	0.492937	5.58858e-62	7.15562e-58
FABP5	0.412529	4.26709e-30	5.46443e-26		SOX4	0.485695	7.12124e-27	9.1216e-23		SEZ6L2	0.491188	5.13368e-44	6.57317e-40
MT3	0.401464	2.65867e-67	3.40469e-63		MEIS2	0.483724	9.87539e-27	1.26494e-22		TCEAL8	0.483328	1.56755e-45	2.00709e-41
CD24	0.398633	7.64015e-45	9.78397e-41		FUS	0.477094	9.67653e-29	1.23947e-24		NOVA1	0.4781	1.20669e-59	1.54505e-55
PRKCB	0.398526	2.29244e-75	2.9357e-71		RPL38	0.470556	8.67887e-66	1.11168e-61		NRP2	0.467367	1.059e-50	1.35594e-46
MEIS2	0.397041	3.27502e-36	4.194e-32		CD24	0.470045	4.38291e-17	5.61407e-13		EIF2S3	0.467032	3.1567e-63	4.04184e-59
MGST1	0.396902	6.49967e-72	8.32347e-68		RPL37A	0.469624	1.80731e-104	2.31498e-100		TXLNG	0.463471	3.87645e-76	4.96341e-72
KCNQ1OT1	0.395362	2.15787e-57	2.76336e-53		SFPQ	0.466379	7.40136e-24	9.48041e-20		EGR1	0.454434	8.91665e-99	1.14169e-94
TAF1D	0.395179	3.39283e-48	4.34486e-44		ACTB	0.463565	1.25984e-41	1.61373e-37		MT-ND5	0.453773	6.47001e-24	8.2842e-20
PAK3	0.393321	4.49803e-78	5.76017e-74		EIF2S3	0.461225	7.26715e-54	9.30849e-50		FGF13	0.445921	2.64326e-47	3.38443e-43
FAM107A	0.391823	1.80712e-82	2.3142e-78		NAP1L1	0.459089	2.65446e-45	3.4001e-41		CDK16	0.444723	2.63636e-62	3.3756e-58
AMBN	0.391161	6.46865e-83	8.28376e-79		GADD45G	0.459087	8.69813e-21	1.11414e-16		TCEAL1	0.443997	1.56808e-59	2.00777e-55
ARF1	0.388289	4.8776e-42	6.24626e-38		MAP3K13	0.457428	8.63035e-115	1.10546e-110		JUNB	0.442771	2.27443e-62	2.91218e-58
NPC2	0.387107	1.27588e-44	1.63389e-40		RPL41	0.456606	2.55708e-66	3.27536e-62		TMEM161B-AS1	0.438537	5.85417e-28	7.49568e-24
IFI44L	0.380962	2.66732e-36	3.41577e-32		PJA1	0.440336	4.32405e-44	5.53867e-40		TRA2B	0.43423	6.71365e-32	8.59616e-28
SOX4	0.378527	2.99988e-31	3.84165e-27		ID4	0.438137	7.46378e-22	9.56036e-18		RBM25	0.433847	7.37918e-31	9.4483e-27
ALDOA	0.371677	2.28146e-29	2.92164e-25		NOVA1	0.434149	4.60755e-53	5.90181e-49		KPNA2	0.433679	5.1655e-41	6.6139e-37
HMGCR	0.365207	1.12271e-58	1.43774e-54		CCNL1	0.429986	9.04512e-34	1.15859e-29		IFRD1	0.431893	1.38257e-45	1.77025e-41
RAB33A	0.364424	1.09356e-93	1.40041e-89		NR2F2	0.428279	3.35896e-50	4.30249e-46		LINC00632	0.419444	4.04817e-34	5.18328e-30
SPARC	0.363918	1.18701e-34	1.52008e-30		LDLR	0.425945	3.05763e-81	3.91652e-77		SOX4	0.419274	1.18254e-75	1.51413e-71
ITM2C	0.363853	2.0919e-39	2.67888e-35		BASP1	0.412947	4.54684e-18	5.82405e-14		MARCKS	0.417774	1.82952e-29	2.34252e-25
RPL39	0.362741	1.5226e-108	1.94984e-104		RAB33A	0.411096	1.71474e-59	2.19641e-55		C11orf96	0.408766	1.2804e-39	1.63942e-35
LYPD1	0.360941	1.14746e-55	1.46944e-51		CDK16	0.409209	1.42374e-55	1.82367e-51		CALY	0.407828	3.00263e-52	3.84457e-48
TUBB2B	0.360459	1.00831e-64	1.29124e-60		BTG1	0.403287	2.65797e-24	3.40459e-20		SCD	0.40726	5.87891e-37	7.52736e-33
NOVA1	0.360193	1.4629e-47	1.87339e-43		LINC01551	0.399192	7.30173e-17	9.35278e-13		BLCAP	0.40699	9.84763e-33	1.26089e-28
MMAB	0.359691	3.3445e-49	4.28297e-45		MVD	0.387817	5.73565e-37	7.3468e-33		HMP19	0.406269	9.77801e-26	1.25198e-21
TUBB2A	0.356295	3.03136e-24	3.88196e-20		CLK1	0.384941	3.27159e-37	4.19058e-33		RBBP7	0.405108	4.93484e-52	6.31857e-48
CCNL1	0.351927	2.98943e-37	3.82827e-33		RPS4X	0.384334	2.73205e-54	3.49949e-50		RPS4X	0.400573	5.51102e-89	7.05631e-85
SLC25A5	0.351461	3.49128e-31	4.47093e-27		HNRNPA2B1	0.383822	4.09074e-17	5.23983e-13		ZFAS1	0.398874	4.31585e-39	5.52602e-35
DCX	0.350842	6.49762e-56	8.32086e-52		CKS2	0.383108	2.18403e-23	2.79752e-19		EFNB1	0.397159	4.90364e-76	6.27862e-72
TMSB4X	0.348522	4.91498e-55	6.29413e-51		VCAN	0.381037	1.29399e-25	1.65747e-21		SLF1	0.395384	6.04883e-39	7.74492e-35
NTRK2	0.343808	2.36957e-65	3.03448e-61		RBMX	0.380784	6.64467e-17	8.51116e-13		CD24	0.392675	2.61188e-40	3.34425e-36
SYAP1	0.338253	9.81874e-56	1.25739e-51		DLL1	0.380607	1.8361e-42	2.35186e-38		BASP1	0.392387	1.09209e-71	1.39832e-67
TMEM59	0.337548	3.77708e-36	4.83693e-32		SYT11	0.380182	4.34471e-33	5.56514e-29		PIK3R1	0.388874	9.98188e-41	1.27808e-36
TSC22D1	0.336217	3.85859e-27	4.94131e-23		IER5	0.377255	1.25809e-28	1.61149e-24		MALAT1	0.388147	1.20201e-75	1.53905e-71
DNAJB1	0.335899	4.73917e-43	6.06898e-39		CFL1	0.375316	1.11515e-30	1.42839e-26		ARL6IP1	0.385458	8.32851e-27	1.06638e-22
PTPRZ1	0.335809	1.37682e-25	1.76315e-21		EPC1	0.37284	3.30534e-26	4.23381e-22		GPM6B	0.38515	3.17556e-29	4.06598e-25
ZFP36L1	0.33327	3.47396e-27	4.44876e-23		HMGA1	0.372237	2.85493e-20	3.65688e-16		TXNIP	0.383659	1.2079e-26	1.54659e-22
FADS2	0.329547	6.24105e-48	7.99229e-44		IFRD1	0.365359	2.24701e-31	2.8782e-27		FGF12	0.37507	4.32673e-65	5.53995e-61
RBM23	0.329484	9.21377e-56	1.17992e-51		RPL17	0.364924	8.64739e-21	1.10764e-16		HES6	0.370603	2.77935e-21	3.55867e-17
LDLR	0.327726	2.32321e-59	2.9751e-55		MORF4L2	0.364829	6.98644e-22	8.94894e-18		ARC	0.36983	3.46513e-47	4.43675e-43
SOX2	0.321512	3.08743e-36	3.95377e-32		CALR	0.364681	3.78914e-16	4.8535e-12		BRD2	0.369558	3.09459e-27	3.96232e-23
CLK1	0.320368	1.42971e-50	1.83089e-46		FADS1	0.364389	7.39756e-19	9.47554e-15		ATF4	0.367347	1.24385e-25	1.59263e-21
MVD	0.317972	7.39119e-39	9.46516e-35		SLC38A2	0.356887	1.47158e-42	1.88495e-38		LDLR	0.366239	1.0822e-59	1.38565e-55
SREK1IP1	0.31674	4.75042e-35	6.08339e-31		HMGCR	0.354229	4.19048e-37	5.36759e-33		TMEM59L	0.36571	4.38488e-26	5.6144e-22
ZFP36L2	0.313104	5.77032e-36	7.38947e-32		SNRPF	0.349659	1.18561e-15	1.51865e-11		HSPH1	0.36528	4.42073e-36	5.6603e-32
TCEAL8	0.310666	3.74329e-29	4.79365e-25		BPTF	0.349106	1.78792e-19	2.29015e-15		GRIN2B	0.363088	1.61613e-48	2.0693e-44
C5orf30	0.309403	2.55272e-37	3.26901e-33		SLC25A5	0.346719	1.503e-18	1.92519e-14		PKIB	0.359822	2.85291e-67	3.65286e-63
SMS	0.307691	2.15678e-22	2.76197e-18		KLF6	0.345994	1.57214e-36	2.01375e-32		CAMK2B	0.359524	1.26008e-34	1.61341e-30
ELOVL5	0.307396	2.12298e-39	2.71869e-35		HSPA8	0.344798	4.3939e-15	5.62814e-11		BEX2	0.358841	3.0058e-26	3.84862e-22
HSD17B12	0.307266	2.73228e-38	3.49895e-34		UBE2R2	0.344332	4.35306e-28	5.57583e-24		CCZ1	0.356046	6.75369e-36	8.64742e-32
OCIAD2	0.30501	1.89833e-79	2.431e-75		RBM25	0.344237	2.94843e-16	3.77665e-12		RPS10	0.355277	9.61588e-25	1.23122e-20
TOMM7	0.30409	1.29479e-27	1.65811e-23		DUOX1	0.34404	6.62885e-36	8.4909e-32		PLK2	0.352752	1.27832e-32	1.63676e-28
JADE1	0.303583	2.13067e-30	2.72853e-26		PPP1R17	0.341835	1.10917e-43	1.42073e-39		YWHAH	0.351591	2.10483e-29	2.69502e-25
SOX11	0.302885	1.00735e-15	1.29002e-11		AUTS2	0.341676	6.976e-27	8.93556e-23		CKS2	0.349175	1.20153e-37	1.53844e-33
WSB1	0.300402	2.03721e-21	2.60885e-17		DPYSL2	0.341606	4.37052e-23	5.5982e-19		LINC00685	0.348797	1.38038e-38	1.76744e-34
IFRD1	0.298775	1.55296e-34	1.98872e-30		RBM3	0.340099	2.40541e-24	3.08109e-20		DUOX1	0.348417	5.90819e-40	7.56484e-36
RPL26	0.296448	3.56931e-64	4.57086e-60		PRKX	0.338816	3.2579e-32	4.17304e-28		TUBB2A	0.348191	3.52972e-37	4.51945e-33
RPLP2	0.295707	2.32572e-73	2.97831e-69		TUBB2A	0.337206	4.23227e-10	5.42112e-06		RAB11B	0.346879	4.37128e-25	5.59699e-21
RPS4X	0.295572	6.26556e-58	8.02367e-54		GTF2I	0.335786	1.56622e-13	2.00617e-09		RPL38	0.346041	8.2889e-51	1.06131e-46
HEY1	0.295048	4.07843e-17	5.22284e-13		MFNG	0.334511	5.98601e-45	7.66749e-41		CADM4	0.341896	8.34686e-31	1.06873e-26
PJA1	0.29475	1.47464e-33	1.88843e-29		DUSP1	0.331692	5.9631e-21	7.63814e-17		CCNL1	0.340264	1.72473e-30	2.20835e-26
PGK1	0.291413	3.94511e-18	5.05211e-14		RPL39	0.330476	3.78914e-61	4.85351e-57		TLE4	0.336849	1.97422e-49	2.5278e-45
HMGA1	0.286245	1.14275e-22	1.4634e-18		MEX3A	0.329913	1.32181e-18	1.69311e-14		ARF1	0.329959	8.2786e-22	1.05999e-17
RSRC2	0.285598	2.22223e-22	2.84579e-18		SYAP1	0.327623	6.08507e-38	7.79437e-34		GADD45G	0.328575	7.80624e-15	9.99511e-11
PSAP	0.285119	6.6314e-21	8.49217e-17		PALM	0.324411	7.65282e-25	9.8025e-21		CELF4	0.328571	1.56479e-16	2.00356e-12
MLLT11	0.281321	7.16001e-22	9.16911e-18		NFKBIA	0.324309	5.54333e-37	7.10045e-33		EPC1	0.328513	4.0834e-20	5.22839e-16
GAP43	0.281072	1.01406e-24	1.29861e-20		FADS2	0.322219	9.05305e-36	1.1596e-31		RGMA	0.326939	2.09881e-35	2.68732e-31
NCALD	0.280686	8.78171e-40	1.12459e-35		MYO6	0.321583	3.78089e-16	4.84294e-12		FUS	0.325251	3.49757e-19	4.47829e-15
DEGS1	0.279733	3.0426e-32	3.89635e-28		ZNF430	0.318756	1.99896e-40	2.56047e-36		COTL1	0.321066	1.14831e-21	1.4703e-17
SLC25A1	0.279046	2.00952e-36	2.57339e-32		PRPF38B	0.318402	1.19422e-19	1.52967e-15		NEGR1	0.320978	6.27841e-41	8.03887e-37
RPS17	0.276708	4.68647e-63	6.00149e-59		AP1S2	0.315896	6.39966e-21	8.19732e-17		KMT2E	0.318482	7.02538e-19	8.9953e-15
TCEAL1	0.276075	4.63658e-55	5.9376e-51		MCL1	0.314268	3.31495e-27	4.24612e-23		SYAP1	0.316463	2.00573e-41	2.56813e-37
DAZAP2	0.27428	8.66035e-33	1.10904e-28		FOXG1	0.313622	6.51892e-15	8.35008e-11		RBM23	0.316423	4.11047e-47	5.26305e-43
FEZ1	0.270478	3.36174e-19	4.30505e-15		HERPUD1	0.313451	1.99083e-20	2.55005e-16		DACH2	0.314142	2.97855e-43	3.81374e-39
P4HA1	0.269963	7.3283e-29	9.38461e-25		FABP5	0.313268	3.61932e-10	4.63599e-06		SNHG8	0.307113	5.72385e-38	7.32882e-34
SON	0.269259	1.58491e-21	2.02963e-17		RBBP6	0.313005	1.76563e-23	2.2616e-19		RP11-499F3.2	0.303744	1.31687e-68	1.68612e-64
DDX5	0.269038	4.40762e-23	5.64439e-19		ARID4B	0.312436	1.23103e-13	1.57682e-09		PSAP	0.303258	1.2033e-17	1.54071e-13
ACTG1	0.268758	8.93398e-54	1.14409e-49		RBM39	0.312099	1.36909e-13	1.75366e-09		PRKCB	0.302478	4.72351e-74	6.04798e-70
SNHG8	0.268056	2.25267e-49	2.88477e-45		RHOB	0.311172	2.82245e-33	3.61527e-29		NOL4	0.301478	1.62241e-19	2.07733e-15
ZBTB20	0.267052	3.64916e-28	4.67311e-24		RBM23	0.309194	4.70247e-47	6.0234e-43		RPL41	0.298009	1.97099e-49	2.52365e-45
GTF2H5	0.266463	2.51437e-23	3.21991e-19		FAM133B	0.306391	6.92302e-17	8.86769e-13		CELF1	0.296927	4.36959e-19	5.59482e-15
SPATS2L	0.265938	2.43936e-35	3.12385e-31		NEUROD1	0.305849	4.29733e-18	5.50445e-14		HSD17B7	0.295316	1.96588e-37	2.51712e-33
ZNF385D	0.265509	1.72281e-71	2.20623e-67		SLCO5A1	0.303275	5.70024e-19	7.30144e-15		NUCKS1	0.293234	3.09265e-18	3.95983e-14
PKIB	0.261542	2.74627e-59	3.51688e-55		TAF1D	0.30243	1.26291e-19	1.61766e-15		NREP	0.290825	4.53336e-14	5.80452e-10
ARF4	0.260962	4.65717e-19	5.96397e-15		HNRNPA0	0.301019	2.68882e-14	3.44411e-10		TUBB	0.287287	1.24375e-56	1.59249e-52
TMEM256	0.260859	1.99035e-24	2.54884e-20		PPIA	0.300567	1.47619e-18	1.89085e-14		EBP	0.287204	1.45389e-17	1.86156e-13
MARCKS	0.260767	8.70893e-20	1.11527e-15		EZH2	0.29663	3.1607e-20	4.04854e-16		HSD17B12	0.286383	5.98845e-24	7.66761e-20
QKI	0.260134	2.05858e-20	2.63622e-16		ATF4	0.296022	4.38749e-13	5.61993e-09		EFNB2	0.285243	1.93045e-12	2.47175e-08
BNIP3	0.259851	1.68581e-09	2.15885e-05		EFNB2	0.295013	1.12869e-16	1.44574e-12		SYT11	0.284673	1.13555e-18	1.45395e-14
RDH11	0.258627	1.54982e-23	1.9847e-19		HDGF	0.294172	1.02941e-17	1.31857e-13		FRMD4B	0.284181	3.64342e-20	4.66503e-16
CYB5A	0.257543	5.65458e-25	7.24126e-21		SRSF2	0.29345	2.62987e-11	3.3686e-07		IER2	0.283248	1.57132e-17	2.01192e-13
MID1	0.256269	3.2989e-25	4.22457e-21		TCEAL8	0.293161	3.6092e-16	4.62302e-12		IDH1	0.282105	7.71619e-16	9.8798e-12
RHOC	0.255687	1.97655e-26	2.53117e-22		SCG5	0.291846	3.19196e-44	4.08858e-40		NEFM	0.282025	3.38569e-20	4.33504e-16
COMMD6	0.254131	8.38335e-21	1.07357e-16		CCNG2	0.290815	3.12751e-20	4.00603e-16		DDX5	0.281383	1.75035e-21	2.24114e-17
SPAG9	0.253998	2.51618e-22	3.22221e-18		NGFRAP1	0.290812	8.64819e-16	1.10775e-11		DNER	0.279339	2.09077e-13	2.67702e-09
SYT11	0.253485	4.57022e-25	5.85262e-21		HNRNPA1L2	0.290749	1.76346e-35	2.25881e-31		NGFRAP1	0.279081	4.86354e-34	6.22728e-30
PNRC1	0.251482	1.3998e-15	1.79258e-11		CDH2	0.290205	2.50685e-21	3.21103e-17		EMC10	0.279041	1.09489e-17	1.40189e-13
TXLNG	0.250814	3.12887e-39	4.00683e-35		ZNF462	0.290119	1.39656e-15	1.78886e-11		RPL26	0.277892	2.26339e-56	2.89804e-52
CDH2	0.250577	1.75519e-19	2.24769e-15		TRA2A	0.290048	2.27785e-19	2.9177e-15		RPS21	0.277436	1.86491e-15	2.38783e-11
LSS	0.250524	6.2722e-50	8.03218e-46		MIDN	0.289898	2.83397e-20	3.63003e-16		HSP90AA1	0.276436	4.71932e-34	6.04262e-30
NLGN4X	0.249221	3.47244e-60	4.44681e-56		MGST3	0.289667	3.81206e-11	4.88287e-07		VSTM2L	0.27547	1.24363e-18	1.59234e-14
MANF	0.248183	1.21378e-22	1.55436e-18		WBP5	0.289582	2.72457e-15	3.4899e-11		ATP6AP2	0.274655	1.93215e-15	2.47392e-11
LARP1B	0.24705	2.82356e-30	3.61585e-26		PLXNA2	0.287807	6.83664e-28	8.75705e-24		SLC38A2	0.273231	7.38274e-31	9.45286e-27
SEC61G	0.247016	1.30693e-17	1.67366e-13		SMS	0.287791	1.54096e-13	1.97382e-09		SON	0.271927	6.09246e-13	7.80078e-09
CDO1	0.246855	6.89731e-14	8.83269e-10		COTL1	0.286746	1.35213e-20	1.73194e-16		FAM133B	0.271555	2.37518e-15	3.04118e-11
NAP1L3	0.2468	9.55502e-48	1.22362e-43		ELAVL3	0.285366	8.89249e-10	1.13904e-05		CD99L2	0.271379	5.30001e-56	6.78613e-52
PEG10	0.244528	1.06955e-15	1.36967e-11		PAX6	0.283883	9.96447e-14	1.27635e-09		LHFP	0.271256	1.06201e-40	1.3598e-36
IER5	0.244436	1.02026e-21	1.30654e-17		RPL37	0.282468	1.24047e-30	1.58892e-26		PLP1	0.270819	6.46568e-79	8.27866e-75
LITAF	0.242819	1.11649e-36	1.42978e-32		YTHDF2	0.282108	5.87273e-12	7.52237e-08		TMEM55B	0.270728	5.18242e-27	6.63557e-23
DLX2	0.24211	8.81112e-72	1.12835e-67		LINC00461	0.281723	7.90035e-12	1.01196e-07		GRIA1	0.270241	3.64327e-19	4.66485e-15
CD99L2	0.241787	8.95717e-51	1.14705e-46		DDX6	0.281288	5.81925e-19	7.45388e-15		INTS6	0.27017	1.45445e-27	1.86228e-23
NRXN1	0.241739	7.1678e-59	9.17908e-55		TXLNG	0.280388	1.18e-35	1.51146e-31		MVK	0.265453	2.38555e-43	3.05446e-39
CFL1	0.240635	1.40735e-23	1.80225e-19		ADNP	0.280231	1.39286e-24	1.78412e-20		PGM2L1	0.264503	1.64748e-12	2.10944e-08
SPECC1	0.240359	2.61284e-40	3.346e-36		DAAM1	0.278756	4.71976e-11	6.04555e-07		SNRPF	0.264125	4.12845e-12	5.28607e-08
S1PR1	0.239938	2.46759e-40	3.16e-36		RPS17	0.278421	1.66876e-41	2.13751e-37		ARHGAP21	0.263718	1.08535e-20	1.38969e-16
FNIP1	0.239868	4.17105e-35	5.34144e-31		H2AFX	0.276476	9.16841e-24	1.17438e-19		RPL37A	0.263461	2.84001e-50	3.63635e-46
FADS1	0.239373	6.43832e-15	8.24492e-11		JADE1	0.273671	4.00859e-26	5.1346e-22		ANKS1B	0.261963	8.80825e-26	1.12781e-21
CDC42	0.23927	1.08848e-14	1.39391e-10		PRDX4	0.270821	9.51965e-17	1.21937e-12		PRPF38B	0.260105	3.76552e-15	4.82137e-11
SEC62	0.239009	2.60663e-17	3.33805e-13		KLHDC8A	0.26945	6.46199e-31	8.27716e-27		IER3	0.259909	4.58179e-28	5.86653e-24
ENO1	0.237886	9.54113e-12	1.22184e-07		EMX2	0.267789	2.68851e-13	3.44371e-09		NUDT11	0.25827	1.13148e-24	1.44875e-20
LTA4H	0.237437	2.1993e-21	2.81642e-17		IDH1	0.267695	6.90911e-14	8.84987e-10		TAF7	0.256588	6.62848e-13	8.4871e-09
PDPN	0.23551	4.37054e-49	5.59692e-45		PKIB	0.267658	1.72434e-52	2.20871e-48		NR2F1-AS1	0.256471	2.05999e-24	2.63761e-20
RGMA	0.234829	2.65547e-25	3.4006e-21		NASP	0.267314	3.12485e-09	4.00262e-05		PRRT2	0.256463	1.19505e-20	1.53014e-16
TPI1	0.234815	1.0631e-17	1.36141e-13		PNRC1	0.267138	4.2163e-10	5.40065e-06		HIP1R	0.256065	4.88596e-32	6.25598e-28
HSD17B7	0.233927	3.42678e-41	4.38834e-37		CHD7	0.265649	4.41227e-11	5.65168e-07		THRA	0.25514	2.23977e-12	2.8678e-08
EIF4H	0.233621	1.26213e-17	1.61629e-13		ZFP36L1	0.264421	1.37516e-13	1.76145e-09		RDH11	0.254682	7.48335e-14	9.58168e-10
LGALS3BP	0.232694	1.26515e-25	1.62015e-21		ZFAND5	0.262155	8.31599e-14	1.0652e-09		RSRC2	0.254138	2.83622e-11	3.6315e-07
CNN3	0.232441	2.40528e-15	3.0802e-11		KATNBL1	0.259991	8.81459e-20	1.12906e-15		AKR1C2	0.253775	1.08723e-38	1.39208e-34
AKAP8L	0.23242	1.12377e-19	1.4391e-15		PEA15	0.259475	6.84899e-16	8.77287e-12		TKT	0.253322	1.79424e-13	2.29735e-09
TRAPPC6A	0.231931	1.77705e-31	2.2757e-27		TRA2B	0.259434	2.55027e-09	3.26664e-05		SGTA	0.252964	1.05309e-21	1.34838e-17
ENO2	0.231166	1.05111e-24	1.34605e-20		OFD1	0.258731	6.78341e-27	8.68887e-23		FIP1L1	0.252792	3.91755e-15	5.01603e-11
LSAMP	0.231067	2.35324e-30	3.01356e-26		ANKRD12	0.258469	2.18614e-11	2.80023e-07		AHSA1	0.252353	7.94014e-17	1.01666e-12
GPC4	0.231031	7.35588e-21	9.41994e-17		SRSF10	0.258105	4.96732e-10	6.36264e-06		VOPP1	0.252306	5.23852e-18	6.7074e-14
NUDT3	0.230132	3.74775e-15	4.79937e-11		NLGN4X	0.257733	1.54091e-59	1.97375e-55		THAP9-AS1	0.252209	9.45118e-25	1.21013e-20
VCP	0.229979	1.95539e-18	2.50407e-14		SLC25A6	0.257595	4.25794e-09	5.45399e-05		TNRC6C	0.251457	1.33136e-15	1.70468e-11
PDIA3	0.22939	1.45686e-15	1.86565e-11		YY1	0.257283	1.09655e-13	1.40457e-09		NDN	0.251398	6.95536e-11	8.90565e-07
FBXO21	0.228526	1.52261e-17	1.94985e-13		EEF1B2	0.256925	2.76964e-07	0.00354763		C14orf1	0.250532	9.16204e-12	1.17311e-07
SPATC1L	0.227604	4.24197e-41	5.43227e-37		BBX	0.256727	8.32657e-13	1.06655e-08		GTF2H2	0.250506	1.22071e-28	1.563e-24
RPS15	0.226824	4.62218e-56	5.91916e-52		RSRC2	0.256621	5.64675e-10	7.23292e-06		FNIP1	0.250502	2.12903e-27	2.72601e-23
MIR181A1HG	0.226411	2.12178e-38	2.71715e-34		SNCAIP	0.255492	1.00651e-31	1.28924e-27		CACYBP	0.249667	3.39539e-11	4.34745e-07
VOPP1	0.226394	2.49617e-20	3.1966e-16		PHLDA1	0.255233	9.61098e-11	1.23107e-06		CPE	0.249475	1.41076e-15	1.80634e-11
FAM133B	0.2261	1.3112e-14	1.67912e-10		TTYH1	0.254569	1.07349e-10	1.37504e-06		SEZ6L	0.248941	3.53188e-46	4.52221e-42
OLFM3	0.225659	1.9134e-33	2.4503e-29		NCOR1	0.253382	4.17448e-10	5.34709e-06		PLD3	0.24891	2.30635e-11	2.95305e-07
TAF9B	0.224188	1.32516e-117	1.697e-113		KMT2E	0.253356	3.13496e-08	0.000401558		APOO	0.248171	4.49981e-22	5.76156e-18
MGMT	0.222902	2.64519e-77	3.38743e-73		NDUFA13	0.253341	5.64799e-15	7.23451e-11		LBH	0.248027	3.88903e-17	4.97951e-13
APOO	0.221084	3.19092e-23	4.08629e-19		FRMD4B	0.252813	6.06463e-22	7.76818e-18		TRA2A	0.247786	1.68115e-15	2.15254e-11
CHST10	0.221071	6.9636e-22	8.91758e-18		SMC4	0.2524	6.75298e-12	8.64989e-08		GABRA2	0.247624	3.61086e-22	4.62334e-18
RPL37	0.220278	2.16216e-29	2.76887e-25		RPLP2	0.25206	3.73962e-34	4.79008e-30		DNAJC12	0.245633	7.75461e-31	9.929e-27
RTN3	0.217116	1.99352e-15	2.5529e-11		JPX	0.251557	4.39071e-32	5.62406e-28		VCP	0.245598	1.45516e-13	1.86319e-09
GPC1	0.216644	1.00004e-12	1.28065e-08		MTF2	0.251462	3.08089e-11	3.94632e-07		ATP6V1H	0.245416	1.66109e-14	2.12686e-10
MAP1LC3A	0.216188	7.09821e-44	9.08997e-40		VEZT	0.25143	9.7467e-22	1.24845e-17		TNPO1	0.245324	1.25181e-19	1.60281e-15
NGFRAP1	0.21513	2.39339e-24	3.06497e-20		IDH2	0.251368	3.94537e-11	5.05363e-07		CADM1	0.245068	1.07481e-09	1.37619e-05
PLD3	0.214911	6.93317e-17	8.87862e-13		PPP1R10	0.250707	1.1068e-19	1.41771e-15		DAZAP2	0.243941	3.63123e-22	4.64943e-18
COMMD2	0.214807	3.89606e-29	4.98929e-25		TLE4	0.248962	9.34161e-24	1.19657e-19		PCSK7	0.243829	1.48204e-17	1.8976e-13
AFF4	0.214211	1.23646e-22	1.5834e-18		DEGS1	0.248554	2.39563e-26	3.06856e-22		CCNB1IP1	0.243792	8.74698e-19	1.11996e-14
BRD2	0.213799	5.17495e-15	6.62704e-11		ADGRG1	0.248411	1.18241e-16	1.51455e-12		STXBP1	0.24322	3.50667e-14	4.48994e-10
ADGRV1	0.211854	8.1375e-37	1.04209e-32		SETD5	0.248205	2.75609e-16	3.53027e-12		CYB5B	0.243112	7.85905e-19	1.00627e-14
CLU	0.210076	1.30835e-08	0.000167548		MAP1LC3A	0.248089	9.2884e-26	1.18975e-21		DCLK1	0.24303	3.97392e-17	5.08821e-13
CAMLG	0.20899	2.11742e-12	2.71157e-08		RNF24	0.24787	2.91138e-12	3.72919e-08		ATAT1	0.242525	5.81618e-12	7.44703e-08
LMO3	0.208846	1.70007e-57	2.17711e-53		MAGED1	0.247164	2.045e-13	2.61944e-09		DDX18	0.24219	1.07371e-16	1.37478e-12
EPS8	0.208487	6.23371e-44	7.98288e-40		PTPRZ1	0.246847	5.89572e-12	7.55183e-08		GNG2	0.241935	6.6214e-15	8.47804e-11
COTL1	0.207171	8.76738e-28	1.12275e-23		TAF9B	0.246671	3.22247e-105	4.12766e-101		MIAT	0.241678	7.32623e-10	9.3805e-06
NDUFA13	0.206656	1.91122e-15	2.44751e-11		BRD2	0.2449	8.4858e-12	1.08695e-07		PITHD1	0.241117	2.13531e-14	2.73405e-10
SRGAP1	0.206636	8.59897e-24	1.10118e-19		SREK1IP1	0.244528	7.61624e-15	9.75565e-11		MTF2	0.240391	6.06251e-12	7.76243e-08
PRRT2	0.206571	3.15148e-25	4.03578e-21		SSBP2	0.243235	8.57959e-16	1.09896e-11		RNF187	0.240375	2.78824e-11	3.57007e-07
RAB31	0.206395	1.28181e-36	1.64149e-32		HNRNPH1	0.242881	1.71949e-07	0.00220249		DOK5	0.239277	3.42581e-36	4.38641e-32
FGF13	0.205964	9.09164e-34	1.16428e-29		GADD45A	0.242453	1.12839e-09	1.44536e-05		APLP2	0.239001	2.58322e-12	3.30755e-08
FAM118A	0.205396	1.49207e-39	1.91074e-35		2006-03-01	0.242087	2.55776e-12	3.27623e-08		SLA	0.238354	1.36683e-14	1.75009e-10
CD59	0.205332	1.51343e-24	1.9381e-20		VCP	0.240649	4.49987e-13	5.76388e-09		CNR1	0.23811	1.44511e-18	1.85032e-14
SNCAIP	0.20463	2.96181e-27	3.79289e-23		ZNF207	0.240418	2.91094e-12	3.72863e-08		BSDC1	0.238088	1.01684e-16	1.30196e-12
KLF6	0.204533	1.01717e-14	1.30259e-10		TCEAL1	0.237727	3.5838e-37	4.59049e-33		MTCH1	0.237811	2.59836e-10	3.32694e-06
PPP2R5C	0.204096	3.20337e-19	4.10224e-15		C11orf96	0.236699	1.80013e-51	2.30579e-47		MRFAP1	0.237558	1.21236e-09	1.55231e-05
LINC00632	0.204022	7.64664e-21	9.79228e-17		RPL26	0.236372	1.52997e-26	1.95974e-22		C1orf52	0.237418	1.79675e-14	2.30056e-10
TMBIM6	0.203963	3.16434e-12	4.05226e-08		MANF	0.235766	2.95929e-17	3.79056e-13		MT-ND4L	0.237206	4.72381e-18	6.04837e-14
RBBP6	0.203711	5.06591e-16	6.48741e-12		LINC00969	0.235288	1.22954e-21	1.57492e-17		TSC22D3	0.236944	2.95572e-23	3.78451e-19
ADGRG1	0.20355	1.48475e-21	1.90137e-17		KMT2A	0.235039	1.20789e-13	1.54718e-09		LIN7A	0.236915	1.79742e-22	2.30142e-18
QPRT	0.202888	2.50978e-21	3.21402e-17		NONO	0.235025	1.06074e-07	0.0013587		SERP2	0.236278	1.39974e-28	1.79222e-24
PLPP3	0.202487	2.2173e-17	2.83948e-13		TCF25	0.234655	2.68708e-09	3.44188e-05		RIC3	0.235858	2.76165e-32	3.53601e-28
CALR	0.202067	2.83065e-09	3.62492e-05		CNTNAP2	0.234372	3.64704e-12	4.67149e-08		DDX24	0.23578	1.84445e-09	2.36163e-05
TMEM41B	0.201161	6.62075e-24	8.47853e-20		C5orf30	0.234039	1.68028e-27	2.15227e-23		ARHGEF9	0.235199	3.8224e-16	4.8942e-12
ZMYM2	0.20116	5.30275e-18	6.7907e-14		PDIA3	0.233457	2.01801e-11	2.58487e-07		CDC42EP3	0.234888	6.72941e-18	8.61633e-14
JPH4	0.20081	2.27037e-34	2.90744e-30		ROCK1	0.232911	2.48878e-15	3.18788e-11		NTM	0.234379	7.53836e-17	9.65211e-13
TAOK3	0.200509	5.38414e-22	6.89493e-18		MAP2	0.23269	4.94747e-07	0.00633721		HSP90B1	0.234379	8.99019e-12	1.1511e-07
ALDOC	0.199565	4.08392e-26	5.22987e-22		EIF5	0.232217	1.55272e-08	0.000198888		ID4	0.234064	1.06341e-22	1.36159e-18
SNHG18	0.199531	2.54281e-39	3.25632e-35		CHKA	0.230582	3.04599e-27	3.90161e-23		FADS2	0.233935	3.45616e-23	4.42527e-19
BPTF	0.199368	1.41335e-10	1.80993e-06		ABHD17B	0.229488	3.54156e-28	4.53638e-24		PDCD7	0.233932	3.4996e-14	4.48089e-10
JPX	0.198252	6.17098e-22	7.90256e-18		MID1	0.229424	5.68609e-20	7.28332e-16		NIPSNAP1	0.233189	5.96552e-13	7.63826e-09
BTG1	0.197456	2.01212e-13	2.57673e-09		EIF3F	0.229048	1.15217e-10	1.47581e-06		NEO1	0.232819	6.78378e-17	8.68595e-13
LINC00685	0.197036	2.8131e-24	3.60246e-20		GPC1	0.228854	1.82849e-18	2.34211e-14		GNAO1	0.232742	1.74371e-11	2.23264e-07
ANKRD12	0.196848	5.12427e-13	6.56215e-09		SLF1	0.22871	2.17287e-23	2.78323e-19		CSAD	0.231823	1.73021e-14	2.21536e-10
EPC1	0.196511	3.76001e-15	4.81507e-11		PTBP1	0.228658	2.83744e-18	3.63447e-14		SC5D	0.231667	8.80532e-18	1.12743e-13
PIR	0.196404	1.45838e-35	1.8676e-31		CD99L2	0.228376	5.13904e-44	6.5826e-40		ACTG1	0.231382	3.14604e-22	4.02819e-18
SOX21	0.195836	1.11672e-21	1.43007e-17		ACLY	0.228324	4.3979e-18	5.63327e-14		MLF2	0.23137	3.35e-10	4.28934e-06
PGAM1	0.195144	8.84597e-10	1.13281e-05		YTHDC1	0.22792	5.90021e-12	7.55758e-08		RGS2	0.231212	3.3745e-25	4.3207e-21
MEST	0.194458	5.20857e-10	6.6701e-06		MEX3B	0.2277	1.61456e-23	2.0681e-19		PNMA1	0.229463	3.64883e-11	4.67196e-07
MVK	0.194339	1.58625e-31	2.03136e-27		ARL4C	0.227064	1.8071e-28	2.31472e-24		RPL39	0.228863	2.83505e-41	3.62999e-37
OFD1	0.194162	1.54666e-19	1.98065e-15		MMAB	0.22676	7.28419e-26	9.33032e-22		CELF3	0.228598	3.44196e-11	4.40708e-07
MT-ND4L	0.193863	6.74641e-21	8.63945e-17		NUDT3	0.22674	1.09273e-08	0.000139968		GUCY1A3	0.228577	1.63827e-16	2.09765e-12
SARAF	0.193849	1.70681e-12	2.18574e-08		HNRNPAB	0.226639	5.31354e-08	0.000680611		LSS	0.227577	3.74715e-30	4.79786e-26
BASP1	0.193375	9.20381e-11	1.17864e-06		SOX9	0.226456	2.10163e-20	2.69197e-16		AKAP8L	0.227532	5.50424e-11	7.04762e-07
WDR45B	0.192331	2.78999e-15	3.57286e-11		LUC7L2	0.226197	3.07048e-17	3.93298e-13		SNRPA1	0.227279	3.02593e-13	3.8744e-09
B2M	0.192212	1.46004e-10	1.86972e-06		HSD17B12	0.225501	4.5773e-21	5.86306e-17		CADM2	0.226247	1.74435e-21	2.23346e-17
SLC25A36	0.19173	9.32958e-16	1.19475e-11		MED17	0.224953	3.15623e-21	4.04281e-17		ANK3	0.225371	3.90149e-11	4.99547e-07
RP3-395M20.12	0.19172	5.40211e-27	6.91794e-23		PABPC1	0.224565	2.8081e-07	0.00359689		SIGIRR	0.225008	3.85611e-32	4.93737e-28
PCDH11X	0.191692	5.67238e-36	7.26405e-32		KLF7	0.223928	4.35002e-19	5.57194e-15		CD200	0.224962	1.32645e-12	1.69838e-08
CDKN1B	0.189411	1.04997e-14	1.34459e-10		ARIH1	0.223878	1.69571e-18	2.17204e-14		TMEM132A	0.223815	2.11726e-09	2.71094e-05
MIAT	0.189303	5.30076e-20	6.78816e-16		BRD4	0.222548	2.12868e-14	2.72662e-10		GLG1	0.223723	2.94114e-14	3.76583e-10
SCG5	0.188061	8.72206e-62	1.11695e-57		MAP2K2	0.222512	1.30845e-09	1.676e-05		EIF3F	0.221975	8.5876e-10	1.09956e-05
CPNE1	0.186275	5.46395e-16	6.99713e-12		METAP2	0.222074	4.22051e-08	0.000540606		OS9	0.221607	1.22582e-17	1.56954e-13
VEZT	0.185977	2.4486e-20	3.13568e-16		GINS2	0.221635	1.36094e-18	1.74323e-14		SERPINI1	0.221056	4.38791e-14	5.61828e-10
TCEAL7	0.185762	2.26056e-13	2.89488e-09		SPATC1L	0.221616	2.50113e-32	3.2037e-28		PGRMC1	0.220702	9.04223e-09	0.000115777
EFNB2	0.185328	3.68007e-08	0.00047127		IGF2BP2	0.221266	1.73014e-10	2.21614e-06		PIK3R3	0.220362	2.26934e-19	2.90566e-15
VCAM1	0.18512	3.31189e-41	4.2412e-37		NDUFS2	0.220909	1.88189e-12	2.41052e-08		UBE2H	0.219892	2.82823e-13	3.62127e-09
GTF2H2	0.185117	9.42258e-29	1.20666e-24		SRGAP3	0.220907	6.68267e-12	8.55983e-08		RPL17	0.219159	2.84317e-13	3.6404e-09
SRGAP2B	0.185102	3.88478e-25	4.97485e-21		MIAT	0.220629	1.05852e-09	1.35586e-05		TNNI3	0.219006	4.9521e-29	6.34067e-25
TUBB	0.184769	2.52832e-09	3.23777e-05		NES	0.220251	3.90845e-16	5.00634e-12		PRNP	0.218422	7.34003e-23	9.39818e-19
DYNC1I2	0.183096	8.81467e-10	1.12881e-05		PLP1	0.219894	1.48816e-46	1.90618e-42		PPP1R10	0.218069	4.25356e-15	5.44626e-11
ARID4B	0.182867	4.11629e-10	5.27132e-06		HMGXB4	0.219532	5.82262e-12	7.45819e-08		TAF9B	0.217233	5.65718e-94	7.24345e-90
C16orf87	0.18233	1.23778e-14	1.5851e-10		TCERG1	0.218445	4.64345e-13	5.9478e-09		HNRNPL	0.215523	4.47685e-24	5.73216e-20
SC5D	0.181984	1.70363e-21	2.18166e-17		RBM15B	0.218249	2.07276e-19	2.655e-15		MMP17	0.214752	3.9042e-39	4.99894e-35
SERP1	0.181975	9.94015e-10	1.27294e-05		KCNQ1OT1	0.218086	7.78777e-08	0.000997535		TCEAL3	0.214717	1.2568e-12	1.6092e-08
TNRC6B	0.180779	1.36229e-10	1.74455e-06		AES	0.217266	7.28869e-10	9.33608e-06		UBE2R2	0.214081	8.05029e-12	1.03076e-07
BBX	0.180481	2.6603e-10	3.40678e-06		ARFGAP2	0.217263	1.29121e-20	1.65392e-16		SREBF2	0.213561	5.18512e-20	6.63903e-16
P4HB	0.179754	4.89503e-10	6.26858e-06		CDC42EP4	0.216837	5.89155e-21	7.54648e-17		BBC3	0.212559	3.36169e-17	4.3043e-13
ACTR3B	0.178598	9.87548e-12	1.26465e-07		BAZ1A	0.216548	1.61502e-08	0.000206868		VWA5A	0.212156	7.28141e-35	9.32312e-31
HMBOX1	0.178365	2.7137e-29	3.47516e-25		SON	0.216275	1.30043e-07	0.00166572		ANKRD10	0.211408	6.11338e-29	7.82757e-25
CTNND1	0.17799	4.17648e-19	5.3484e-15		TPT1	0.215931	1.80824e-17	2.31618e-13		RTN3	0.211003	5.16416e-12	6.61219e-08
PNPLA3	0.177866	2.96411e-34	3.79583e-30		CITED2	0.215509	1.10502e-12	1.41542e-08		SRSF10	0.210555	1.76312e-08	0.00022575
CTNNB1	0.177412	4.27969e-11	5.48057e-07		ARID1A	0.213679	1.27873e-13	1.63792e-09		ZC2HC1A	0.210005	1.88341e-10	2.41152e-06
TCEAL3	0.177384	5.02848e-17	6.43947e-13		QKI	0.213669	7.57207e-22	9.69907e-18		TUBA1A	0.209846	2.2936e-22	2.93673e-18
USMG5	0.176747	3.64533e-09	4.6682e-05		HNRNPUL1	0.212805	3.96184e-11	5.07473e-07		SRSF7	0.20954	1.04494e-07	0.00133794
CALU	0.176152	1.36207e-10	1.74426e-06		NDN	0.2123	1.72775e-08	0.000221307		LINGO1	0.208112	1.37888e-14	1.76552e-10
SMARCA1	0.175396	3.09591e-12	3.96462e-08		GPC2	0.212246	4.63145e-09	5.93242e-05		OLFM2	0.207976	1.07805e-14	1.38034e-10
SETD5	0.175063	2.02531e-12	2.59362e-08		PEG10	0.211897	2.96669e-08	0.000380003		SCN3B	0.206766	3.05964e-12	3.91756e-08
SERPINH1	0.174828	2.77185e-17	3.54964e-13		KAT6B	0.211	5.09604e-09	6.52752e-05		SF3A2	0.20651	8.01739e-26	1.02655e-21
2003-03-01	0.174761	9.484e-43	1.21452e-38		HSP90B1	0.210902	2.87092e-07	0.00367736		RBBP6	0.206241	2.5683e-13	3.28845e-09
COL6A1	0.174695	9.38048e-22	1.20126e-17		SPATS2L	0.210356	1.46966e-33	1.88249e-29		CADM3	0.205243	6.44531e-14	8.25258e-10
ADAMTS6	0.174195	8.13419e-22	1.04166e-17		MVK	0.210159	2.8485e-34	3.64864e-30		KLC1	0.204477	5.52331e-08	0.000707204
HLA-C	0.174099	2.57399e-18	3.29625e-14		ZFP36L2	0.209896	1.75264e-31	2.24496e-27		ADGRL3	0.204204	1.92287e-40	2.46205e-36
BNIP3L	0.174092	7.39862e-09	9.47468e-05		TP53I11	0.209416	3.17114e-11	4.06192e-07		AMD1	0.20355	1.23714e-13	1.58403e-09
PRPS1	0.173711	7.91814e-17	1.014e-12		UXT	0.208376	6.21694e-08	0.000796328		NEUROD2	0.203214	1.84392e-14	2.36095e-10
EIF1B	0.17344	8.64446e-09	0.000110701		BAZ2B	0.207843	3.46675e-11	4.44056e-07		SAE1	0.202686	5.08045e-16	6.50501e-12
RIC3	0.173394	3.68883e-39	4.72392e-35		TNRC6C	0.207738	2.16718e-15	2.77594e-11		ZNF821	0.202095	1.77335e-13	2.2706e-09
PSMD10	0.172796	6.69725e-15	8.5765e-11		PDCD7	0.206862	2.6271e-11	3.36505e-07		SCG2	0.201245	4.0784e-08	0.000522198
MALAT1	0.172447	1.64068e-15	2.10105e-11		MAP1A	0.206687	5.57724e-11	7.14389e-07		MAPT	0.201116	2.6885e-07	0.00344235
INTS6	0.17204	2.58726e-13	3.31324e-09		FAM127B	0.206536	3.18707e-17	4.08232e-13		PPP1R15A	0.200847	1.38184e-15	1.76931e-11
OSER1	0.171818	6.56534e-19	8.40758e-15		KPNB1	0.206462	2.49673e-08	0.000319807		EIF4B	0.200345	3.73617e-08	0.000478379
AKAP17A	0.171319	3.83391e-20	4.9097e-16		PRC1	0.206035	3.34825e-16	4.28877e-12		RBFOX2	0.200127	7.26609e-09	9.3035e-05
SLC38A2	0.170928	3.32583e-22	4.25906e-18		LTA4H	0.205882	4.82223e-14	6.17679e-10		SPATC1L	0.199951	4.298e-38	5.50315e-34
DNAJB2	0.170723	1.45675e-17	1.86552e-13		DNER	0.205847	9.5065e-12	1.21769e-07		LAMTOR4	0.199493	7.94997e-11	1.01791e-06
CCZ1	0.170521	2.56037e-19	3.27881e-15		LARP1B	0.205178	1.17208e-21	1.50132e-17		ING2	0.199272	6.4649e-16	8.27766e-12
JAKMIP2	0.17044	1.19604e-15	1.53165e-11		ELOVL6	0.205152	1.04048e-21	1.33275e-17		YY1	0.19916	4.86024e-09	6.22306e-05
DPYSL2	0.170318	1.44764e-12	1.85385e-08		CDKN1B	0.205142	2.94099e-13	3.76711e-09		PHIP	0.199052	2.14854e-08	0.000275099
GPI	0.170235	2.94797e-16	3.77517e-12		RPL22L1	0.204356	7.44856e-14	9.54086e-10		RBFOX1	0.198891	5.34815e-24	6.84777e-20
BLCAP	0.16963	1.24301e-16	1.5918e-12		FBXO21	0.20423	5.20852e-11	6.6716e-07		NECAP1	0.198774	2.39747e-11	3.06972e-07
IGF2BP2	0.169125	1.62554e-08	0.000208166		CKS1B	0.203277	5.37801e-09	6.88869e-05		RGS17	0.198632	6.11663e-11	7.83174e-07
RHOB	0.168241	3.6664e-20	4.69519e-16		CNOT2	0.20282	1.357e-14	1.73818e-10		SNHG15	0.198516	1.19273e-23	1.52718e-19
NEK6	0.167873	1.80518e-22	2.31171e-18		RAF1	0.202608	2.89547e-17	3.70881e-13		ELOVL6	0.198418	7.05259e-17	9.03014e-13
MTCH1	0.167264	1.24124e-09	1.58953e-05		HNRNPL	0.202458	1.30039e-20	1.66567e-16		AKR1C1	0.198296	8.9907e-22	1.15117e-17
TUBA1A	0.167197	3.53615e-12	4.52839e-08		NIPSNAP1	0.20242	2.12422e-10	2.72092e-06		CLK4	0.198286	9.549e-28	1.22265e-23
ARMCX3	0.167179	6.68858e-13	8.5654e-09		PRRT2	0.202072	5.28202e-19	6.76574e-15		TOMM7	0.19815	2.05675e-09	2.63346e-05
HERPUD1	0.167117	1.29848e-12	1.66283e-08		USP9X	0.201335	6.02289e-19	7.71472e-15		USMG5	0.197878	4.41589e-09	5.6541e-05
CSNK1D	0.165732	7.36416e-18	9.43055e-14		SPECC1	0.200965	8.57408e-33	1.09825e-28		ACSL4	0.197624	1.78776e-24	2.28904e-20
EXOG	0.165297	6.95173e-18	8.90238e-14		PCDHB2	0.200391	5.68603e-24	7.28324e-20		DAAM1	0.197448	1.5172e-07	0.00194262
PPP1CC	0.16517	1.27196e-08	0.000162888		PRRC2B	0.200018	6.14929e-15	7.87662e-11		ACSL3	0.197336	6.82981e-13	8.74489e-09
GDI1	0.164869	5.14592e-14	6.58987e-10		LMNB1	0.199998	1.59213e-12	2.03935e-08		OFD1	0.197268	8.81359e-18	1.12849e-13
LRIG1	0.164772	1.47321e-21	1.88659e-17		RP11-499F3.2	0.199751	3.86267e-47	4.9477e-43		TAOK3	0.197087	9.14262e-10	1.17062e-05
APP	0.164667	1.44381e-09	1.84894e-05		CCDC59	0.199624	1.32371e-14	1.69554e-10		EIF4H	0.197055	3.54955e-09	4.54484e-05
TOMM20	0.164573	3.31972e-08	0.000425124		ACTR1A	0.199013	2.40102e-10	3.07547e-06		HSPA8	0.197051	1.58906e-10	2.03463e-06
CHKA	0.164078	3.50474e-17	4.48817e-13		COMMD2	0.198942	3.60156e-25	4.61324e-21		GFOD2	0.197015	3.94309e-15	5.04873e-11
PAFAH1B1	0.164033	5.1455e-11	6.58933e-07		SESTD1	0.1988	1.2737e-16	1.63148e-12		PCDHB2	0.196988	2.3083e-20	2.95555e-16
USP9X	0.163916	6.62151e-18	8.4795e-14		CCAR1	0.198784	1.24269e-09	1.59176e-05		TCF25	0.196633	1.56102e-07	0.00199874
MRPS30	0.163765	6.674e-15	8.54673e-11		PGRMC2	0.198534	5.35483e-09	6.85901e-05		SLC25A14	0.196092	1.15257e-22	1.47576e-18
FILIP1	0.163688	1.2564e-17	1.60894e-13		NCALD	0.198481	1.64528e-27	2.10743e-23		WBP2	0.195936	5.74243e-11	7.35261e-07
GCA	0.163507	1.31358e-11	1.68217e-07		ACSL3	0.198101	3.32595e-17	4.26021e-13		NUTM2B-AS1	0.195669	2.02272e-16	2.58989e-12
TBL1X	0.162438	1.01053e-19	1.29408e-15		WAC	0.197909	5.15707e-11	6.6057e-07		NAT14	0.195043	3.53619e-15	4.52774e-11
POLDIP3	0.161806	3.50386e-17	4.48704e-13		TOP2A	0.197032	3.9417e-09	5.04892e-05		NAA15	0.194505	2.99876e-12	3.83961e-08
SEMA5A	0.16173	1.28355e-29	1.64372e-25		MASP1	0.196624	7.71201e-16	9.87832e-12		DKK3	0.194236	1.27022e-11	1.62638e-07
ARIH1	0.161721	4.66873e-20	5.97878e-16		CELF1	0.196601	3.16498e-10	4.05402e-06		DPYSL2	0.193744	9.74613e-08	0.00124789
LINC00511	0.160706	2.92275e-25	3.74287e-21		PNPLA3	0.196081	5.31759e-31	6.8113e-27		RSPO3	0.193174	2.63147e-16	3.36933e-12
RBM25	0.160464	2.664e-07	0.00341151		PTTG1IP	0.195603	4.0494e-10	5.18688e-06		ARMCX3	0.193089	1.65197e-08	0.000211518
SGCE	0.160237	3.72422e-23	4.76924e-19		EML1	0.194719	3.15073e-18	4.03578e-14		KLF7	0.192766	1.45504e-11	1.86303e-07
AHSA1	0.159745	3.16822e-11	4.05722e-07		HSD17B7	0.194247	9.08036e-26	1.1631e-21		PPP1R1A	0.192449	3.06151e-16	3.91996e-12
UBL3	0.159614	9.97573e-16	1.27749e-11		THUMPD1	0.193788	3.83404e-15	4.91102e-11		CDH7	0.192363	3.52973e-11	4.51946e-07
SGTA	0.159184	1.29975e-16	1.66446e-12		LMBR1L	0.193531	3.12418e-16	4.00176e-12		PEF1	0.192317	1.30452e-20	1.6703e-16
DUSP4	0.158919	1.51693e-24	1.94258e-20		RAB11B	0.193485	1.00384e-10	1.28582e-06		UBC	0.191727	2.3303e-16	2.98372e-12
OTUD5	0.158906	5.71072e-22	7.31315e-18		ZSCAN18	0.193364	1.13434e-11	1.45298e-07		RAB14	0.191401	3.48251e-10	4.45901e-06
ACTB	0.158866	4.92401e-18	6.30569e-14		FNIP1	0.192663	2.39401e-21	3.06649e-17		SETD5	0.191124	2.00963e-11	2.57312e-07
RPS25	0.158806	9.22919e-20	1.18189e-15		SAP30	0.192417	3.70534e-18	4.74617e-14		RNF24	0.190948	5.20405e-08	0.000666326
UXT	0.158497	9.9963e-09	0.000128013		CEP290	0.191912	1.19236e-14	1.52729e-10		PAK1	0.190673	8.85473e-12	1.13376e-07
PDIA6	0.157971	5.00717e-08	0.000641218		AKAP8L	0.190917	3.7954e-08	0.000486152		EIF1B	0.190656	6.79121e-08	0.000869546
C8orf4	0.157638	5.70964e-11	7.31177e-07		LSS	0.190095	1.45257e-24	1.8606e-20		LRRC4C	0.190511	4.75715e-35	6.09106e-31
QARS	0.15753	2.77291e-10	3.55099e-06		NME4	0.19006	2.66892e-07	0.00341862		JPX	0.19045	4.70694e-21	6.02676e-17
RPL35	0.157346	3.75872e-22	4.81342e-18		RBBP4	0.189833	3.64082e-07	0.00466353		MOAP1	0.190077	6.19613e-10	7.93352e-06
DUSP10	0.157189	4.92493e-43	6.30687e-39		AFF4	0.18959	8.25177e-12	1.05697e-07		SF1	0.189772	3.25611e-08	0.000416913
TYW3	0.156989	9.28195e-81	1.18865e-76		RGMA	0.18957	2.60836e-15	3.34105e-11		GLO1	0.189601	5.68349e-10	7.27714e-06
AMMECR1	0.156689	2.03068e-28	2.60049e-24		SF1	0.18929	2.77253e-07	0.00355134		PINK1	0.189305	7.387e-14	9.45831e-10
C20orf24	0.156268	1.54532e-11	1.97894e-07		MCM7	0.189232	2.56095e-08	0.000328032		DDIT3	0.188964	7.13499e-26	9.13565e-22
CCSER2	0.156059	1.20045e-15	1.5373e-11		PHB2	0.189092	4.09738e-08	0.000524833		BIN1	0.188442	2.20241e-17	2.81997e-13
FAM171B	0.155897	6.39722e-11	8.19228e-07		DPYSL4	0.189043	1.53796e-12	1.96997e-08		SLC25A1	0.188077	1.03847e-16	1.32966e-12
ZFX	0.15536	4.46565e-28	5.71872e-24		PGAP1	0.18891	7.22809e-08	0.000925846		RBM39	0.187453	2.86089e-07	0.00366308
AC090498.1	0.154896	1.28495e-11	1.64551e-07		CCNB1IP1	0.188839	9.63771e-08	0.00123449		DNAJB9	0.187142	1.04511e-11	1.33816e-07
TNRC6C	0.154685	4.50874e-16	5.77389e-12		EBP	0.187333	2.46945e-12	3.16311e-08		OTUD5	0.187024	1.32179e-21	1.69242e-17
WNT7A	0.154341	8.29865e-45	1.06273e-40		OTUD5	0.186989	7.35326e-25	9.41879e-21		NTRK3	0.186984	5.62778e-12	7.2058e-08
RAB14	0.154289	4.10119e-12	5.25198e-08		RDH11	0.186771	2.25029e-09	2.8824e-05		COMMD2	0.186397	5.2221e-19	6.68638e-15
SYBU	0.154234	6.21315e-22	7.95656e-18		IPO9	0.185143	5.1365e-14	6.57935e-10		C6orf48	0.186119	5.62272e-07	0.00719932
RAB9A	0.154186	4.54921e-15	5.82572e-11		POLR2J3	0.185049	6.37605e-12	8.16708e-08		DPP6	0.185944	3.17786e-75	4.06894e-71
SLC25A37	0.154139	1.07816e-14	1.3807e-10		INTS6	0.184963	1.08043e-15	1.38392e-11		STARD4-AS1	0.185797	4.17419e-15	5.34463e-11
SFRP2	0.153928	3.50814e-13	4.49252e-09		BCL7A	0.184842	3.99798e-08	0.000512101		DMTN	0.185601	2.3762e-12	3.04249e-08
OBSL1	0.153638	1.8572e-15	2.37833e-11		ELOVL5	0.184733	2.3031e-14	2.95004e-10		ARMCX6	0.185395	8.39338e-18	1.07469e-13
BCAN	0.152771	9.90366e-15	1.26826e-10		LGALS3BP	0.184051	5.39753e-21	6.91369e-17		C5orf30	0.184834	2.09042e-20	2.67658e-16
ACVR2A	0.152735	5.04213e-20	6.45695e-16		CDK1	0.1835	3.23239e-13	4.14036e-09		DDX6	0.184542	1.70458e-08	0.000218255
ATP1A2	0.152686	4.02968e-32	5.1604e-28		FEZF2	0.183123	3.70721e-13	4.74857e-09		GNAL	0.184044	7.03194e-28	9.0037e-24
BCHE	0.152167	5.29513e-22	6.78094e-18		QARS	0.182364	4.52328e-13	5.79388e-09		ZNF512	0.183766	2.65485e-24	3.39927e-20
ZFAND5	0.151633	2.45416e-09	3.1428e-05		MARK3	0.182278	4.52661e-13	5.79814e-09		TDG	0.18331	2.14982e-08	0.000275263
NUDT11	0.15137	5.0485e-15	6.4651e-11		ORC6	0.182082	9.18868e-12	1.17698e-07		BZW2	0.182871	4.50352e-07	0.00576631
JUND	0.151321	6.09811e-14	7.80923e-10		NUDT11	0.181938	2.74185e-13	3.51204e-09		CHL1	0.182691	7.87035e-71	1.00772e-66
SERTAD1	0.151151	1.9062e-17	2.44108e-13		ING1	0.181812	5.949e-22	7.62008e-18		SCML1	0.182668	9.09046e-21	1.16394e-16
ALKBH5	0.150866	7.90735e-15	1.01262e-10		RSBN1L	0.181771	1.50528e-07	0.00192812		ANKRD12	0.182343	4.3309e-07	0.00554529
BAZ2B	0.150635	1.16652e-07	0.00149385		VOPP1	0.181461	3.04363e-12	3.89858e-08		RPL37	0.182218	4.17298e-20	5.34308e-16
REL	0.150494	5.06651e-19	6.48818e-15		CTD-2034I4.2	0.181276	9.38693e-58	1.20237e-53		GABARAPL1	0.182014	2.38797e-08	0.000305756
PUDP	0.150361	1.28349e-20	1.64363e-16		RBM5	0.17972	3.13265e-13	4.01261e-09		ZNF430	0.181962	1.28217e-15	1.6417e-11
SREBF2	0.150046	8.52299e-18	1.09145e-13		KANSL2	0.179361	2.30153e-23	2.94802e-19		EIF3L	0.181272	5.1306e-10	6.56922e-06
TRA2A	0.149735	4.13343e-09	5.29327e-05		RND3	0.179188	1.82545e-09	2.33822e-05		ERV3-1	0.181125	5.07449e-13	6.49737e-09
ABHD3	0.149572	9.64049e-15	1.23456e-10		SMARCA1	0.179047	2.53226e-13	3.24357e-09		GABRB2	0.180894	3.10791e-22	3.97937e-18
POU2F1	0.149483	1.93052e-13	2.47222e-09		NOL4	0.178976	3.54366e-26	4.53908e-22		COL6A1	0.180861	2.13276e-19	2.73078e-15
CCDC59	0.148762	6.55586e-10	8.39543e-06		KAT6A	0.178956	5.95223e-16	7.62421e-12		SULT4A1	0.180829	2.10021e-10	2.68911e-06
FKBP10	0.148727	1.33342e-10	1.70758e-06		PPP1R12A	0.178558	2.42446e-09	3.10549e-05		PRCC	0.180564	1.91029e-13	2.44593e-09
NUCB1	0.148439	3.85002e-13	4.93034e-09		CTNNB1	0.177641	1.5137e-10	1.9389e-06		TCF7	0.180244	2.77681e-21	3.55542e-17
IRS2	0.147952	1.31642e-16	1.68581e-12		ZBTB20	0.177511	8.45956e-18	1.08358e-13		ENOPH1	0.179011	1.11726e-07	0.00143053
KATNBL1	0.146911	2.81694e-10	3.60738e-06		VRK1	0.1771	2.47573e-12	3.17116e-08		HOOK2	0.178762	8.23186e-16	1.05401e-11
AK4	0.146761	5.2751e-20	6.75529e-16		AKIRIN2	0.177049	6.63386e-12	8.49731e-08		RP11-395G23.3	0.178278	1.76973e-17	2.26596e-13
ZRSR2	0.146269	3.48319e-28	4.46058e-24		PAK1	0.176928	8.42113e-12	1.07866e-07		NECAB1	0.177747	6.6197e-16	8.47586e-12
CMBL	0.145727	2.83627e-07	0.00363213		ASCL1	0.17588	1.36542e-14	1.74897e-10		AP006222.2	0.17768	3.71152e-24	4.75223e-20
PSMA2	0.144857	2.19625e-07	0.00281252		TNPO1	0.175495	1.47963e-10	1.89526e-06		FBXO21	0.177511	3.30509e-08	0.000423183
RPS27	0.14463	1.80277e-18	2.30863e-14		KLHL35	0.175167	2.18689e-08	0.000280119		KC6	0.177511	1.99669e-64	2.55657e-60
KLF7	0.144508	7.74997e-28	9.92461e-24		CCNL2	0.174989	8.77026e-17	1.12338e-12		PLEKHA1	0.177284	1.75335e-13	2.24499e-09
DHCR24	0.144154	4.69327e-18	6.0102e-14		ACVR2A	0.174731	9.99285e-18	1.27998e-13		ACTR1B	0.177167	1.62363e-11	2.0789e-07
PDCD7	0.144062	1.7466e-08	0.00022367		GSK3B	0.174625	3.64031e-11	4.66287e-07		LPL	0.176195	2.55901e-26	3.27656e-22
ATP6V0E2	0.143794	4.15599e-12	5.32216e-08		PRKCB	0.174195	4.31762e-34	5.53044e-30		SSBP3	0.176156	6.26446e-09	8.02102e-05
IGFBP4	0.143557	8.07042e-22	1.0335e-17		CFAP20	0.174191	3.13608e-09	4.017e-05		GRIPAP1	0.176126	1.7945e-11	2.29767e-07
KCNN3	0.143403	3.60301e-16	4.61401e-12		ZFHX4	0.173841	8.59306e-17	1.10068e-12		NCKAP5	0.175472	9.88248e-17	1.26535e-12
EBP	0.143381	3.16938e-10	4.05871e-06		WNK1	0.173573	5.86956e-12	7.51832e-08		PRKCSH	0.175331	5.39649e-14	6.90967e-10
FAM127B	0.143073	6.11308e-13	7.82841e-09		GLG1	0.173469	8.7235e-13	1.11739e-08		CRMP1	0.174841	2.52704e-09	3.23562e-05
KMT2E	0.143068	5.74198e-07	0.00735318		UBE2T	0.173367	4.66567e-08	0.000597626		IER5	0.174686	4.83114e-10	6.18579e-06
C14orf1	0.14268	5.94238e-09	7.60981e-05		BCHE	0.173194	1.56381e-11	2.00308e-07		HNRNPR	0.174673	6.77914e-07	0.00868002
ACSL3	0.142642	4.18007e-12	5.353e-08		GSE1	0.173159	2.43177e-09	3.11486e-05		SFT2D1	0.174528	7.84852e-18	1.00492e-13
PPM1K	0.142081	3.73438e-10	4.78225e-06		DDHD1	0.17306	1.09043e-20	1.39674e-16		TMEFF2	0.174504	3.72954e-28	4.7753e-24
C1D	0.141977	4.77481e-14	6.11462e-10		BSDC1	0.172779	7.48308e-13	9.58508e-09		CCDC115	0.174445	2.69236e-10	3.4473e-06
EML1	0.141783	1.61084e-15	2.06284e-11		KIF1B	0.172372	6.22864e-07	0.00797827		STOX2	0.17441	5.38087e-22	6.88966e-18
ZSCAN18	0.141776	8.13556e-09	0.000104184		NELL2	0.171987	3.78577e-12	4.84919e-08		EPB41L4A-AS1	0.174393	1.62966e-07	0.00208661
ARPC5	0.141443	1.07014e-08	0.000137042		FAM127A	0.171858	6.29276e-07	0.0080604		ST3GAL1	0.174234	4.25827e-11	5.45229e-07
C9orf72	0.141383	1.49787e-19	1.91817e-15		LTBP4	0.171238	9.07084e-16	1.16188e-11		CFAP20	0.173622	1.04671e-08	0.00013402
ABCA5	0.141212	2.69789e-25	3.45492e-21		RNF139	0.170727	6.06637e-14	7.77042e-10		USP5	0.173494	3.40103e-15	4.35468e-11
PTBP1	0.140695	3.20963e-08	0.000411025		PGD	0.170581	9.79601e-11	1.25477e-06		AAK1	0.173461	2.43219e-07	0.00311417
PRPF38B	0.140485	2.82363e-08	0.000361594		USP22	0.170487	5.89102e-10	7.5458e-06		AP1M1	0.173455	6.05984e-14	7.75902e-10
NDUFAF1	0.140397	7.90963e-19	1.01291e-14		PDP1	0.169235	2.15634e-21	2.76206e-17		FO538757.2	0.173433	1.53788e-24	1.9691e-20
RABGGTB	0.140083	5.01009e-16	6.41592e-12		JUND	0.16921	1.87818e-12	2.40575e-08		ZRSR2	0.173168	3.21168e-24	4.11224e-20
ARHGAP21	0.139703	4.62719e-11	5.92557e-07		CTNNAL1	0.168538	5.96547e-14	7.64117e-10		ZNF608	0.172189	3.19829e-19	4.09509e-15
MAFG	0.139269	2.42745e-13	3.10859e-09		TOPORS	0.168139	8.33609e-16	1.06777e-11		ANKRD46	0.172175	1.73008e-07	0.0022152
EPHA4	0.139262	1.11575e-14	1.42883e-10		ARHGAP21	0.167889	7.24721e-14	9.28295e-10		STX2	0.171475	1.69165e-13	2.16599e-09
AIFM1	0.138942	1.19385e-19	1.52884e-15		HPCAL1	0.167884	6.26942e-10	8.0305e-06		ZNF622	0.171374	7.78234e-14	9.96451e-10
LRRC17	0.138529	1.13386e-11	1.45202e-07		ZMYM2	0.167783	5.25507e-09	6.73122e-05		PVRL2	0.170985	5.42393e-16	6.9448e-12
FARP1	0.138087	6.78223e-10	8.68532e-06		ANKRD10	0.167448	1.83389e-17	2.34903e-13		BCL7A	0.17094	7.05983e-07	0.00903941
BSDC1	0.138081	2.79663e-12	3.58136e-08		CHTOP	0.167276	8.87288e-09	0.000113653		POU2F2	0.170822	4.39185e-11	5.62332e-07
PALM	0.138022	7.59832e-12	9.73041e-08		CENPF	0.166778	6.0232e-07	0.00771512		MRPL18	0.17078	1.27795e-07	0.00163628
PDIA4	0.137934	2.45395e-10	3.14253e-06		WTAP	0.166649	1.39602e-08	0.000178816		RP1-39G22.7	0.170761	5.8468e-15	7.48624e-11
RPL31	0.1379	4.99592e-11	6.39778e-07		FNBP4	0.166554	5.50455e-09	7.05078e-05		MAP1B	0.17055	4.38124e-13	5.60974e-09
JAG1	0.137763	3.71827e-27	4.76161e-23		CENPH	0.166531	1.42391e-12	1.82388e-08		PHACTR3	0.170502	2.32201e-10	2.9731e-06
PPP2R2A	0.137608	4.96241e-09	6.35487e-05		C20orf24	0.166292	1.27106e-10	1.6281e-06		TRAPPC2	0.170222	1.1321e-21	1.44954e-17
SCML1	0.137584	9.5525e-14	1.22329e-09		JAKMIP2	0.166236	2.29628e-09	2.94131e-05		DPYSL4	0.170173	1.67827e-10	2.14886e-06
MCL1	0.137512	5.3594e-09	6.86325e-05		LYPD1	0.166218	9.55186e-18	1.2235e-13		EIF1	0.170105	8.47831e-18	1.08556e-13
MRPL33	0.137353	9.29408e-09	0.00011902		KANSL1	0.166117	1.06288e-18	1.36144e-14		HKR1	0.169842	8.51946e-52	1.09083e-47
CADM1	0.137329	1.78041e-07	0.00227999		PBX1	0.166081	2.85165e-07	0.00365268		NRXN2	0.169825	2.89054e-08	0.000370105
SIGIRR	0.137206	8.35537e-35	1.06999e-30		GPR82	0.166027	1.96097e-26	2.51181e-22		CCAR1	0.169671	6.98321e-09	8.9413e-05
MED10	0.136875	2.23022e-08	0.000285602		MIR181A1HG	0.165935	1.04179e-26	1.33443e-22		ARL4C	0.169614	4.27605e-20	5.47505e-16
MAP2	0.136865	6.3184e-08	0.000809134		RGS2	0.165073	5.2557e-20	6.73202e-16		ZNF195	0.169587	4.95228e-13	6.3409e-09
PEF1	0.136779	9.38575e-11	1.20194e-06		NCKAP5	0.164673	1.07776e-18	1.3805e-14		HSPA9	0.169526	3.07926e-08	0.000394268
A1BG	0.136666	2.49569e-15	3.19598e-11		CCZ1	0.164543	6.06699e-14	7.77121e-10		KTN1	0.169027	7.01437e-07	0.00898119
HNRNPA1L2	0.136212	3.55023e-11	4.54642e-07		RPL27	0.164519	1.09675e-09	1.40483e-05		MED17	0.168837	4.63216e-14	5.93101e-10
CDC42EP4	0.136187	2.64931e-09	3.3927e-05		MSI1	0.164463	1.50117e-12	1.92285e-08		KCNJ6	0.168392	2.17926e-28	2.79033e-24
TET1	0.136072	9.22701e-08	0.00118161		IRS2	0.164074	2.30124e-17	2.94766e-13		FAM134A	0.168192	5.70172e-11	7.30048e-07
FASN	0.135782	7.53502e-17	9.64935e-13		KC6	0.163923	2.37004e-56	3.03579e-52		SPRY1	0.168041	6.60627e-29	8.45867e-25
HSF2	0.135758	1.57366e-13	2.01522e-09		SLC25A1	0.163858	5.38493e-14	6.89755e-10		PKIA	0.167884	8.41071e-10	1.07691e-05
AMD1	0.135653	1.99801e-09	2.55865e-05		AMD1	0.163627	1.1337e-11	1.45215e-07		ZFAND5	0.167873	1.04793e-07	0.00134176
CRYZ	0.135101	2.09574e-71	2.6838e-67		GRIPAP1	0.163601	1.06172e-14	1.35995e-10		WDYHV1	0.16786	1.49149e-20	1.90971e-16
MMP15	0.134956	1.8083e-22	2.31571e-18		SRSF6	0.163232	1.53461e-11	1.96568e-07		FAM133A	0.16725	2.24495e-37	2.87444e-33
RBM6	0.134778	2.21491e-10	2.83641e-06		DYNC1LI1	0.163117	6.94442e-08	0.000889511		MAPRE2	0.167229	3.81607e-13	4.88609e-09
HLA-A	0.134352	1.12431e-07	0.00143979		TMEM41B	0.162843	1.09479e-15	1.40232e-11		MCL1	0.167118	1.34329e-14	1.71995e-10
HNRNPL	0.133975	1.36518e-10	1.74825e-06		PCF11	0.162753	1.71318e-12	2.19441e-08		DLG2	0.166636	1.17756e-17	1.50774e-13
LINC00969	0.133956	2.05761e-10	2.63497e-06		VPS51	0.162717	1.43746e-13	1.84124e-09		GFOD1	0.165974	9.71056e-14	1.24334e-09
ABHD17B	0.133945	4.91457e-16	6.2936e-12		GOLM1	0.162488	2.33711e-08	0.000299361		ZBTB38	0.165455	2.6242e-13	3.36003e-09
PCSK7	0.133484	8.83068e-16	1.13086e-11		B3GAT2	0.162328	5.71553e-15	7.32102e-11		ARFGAP2	0.165387	1.24319e-10	1.59179e-06
PRKX	0.133165	2.07772e-14	2.66073e-10		ZNF219	0.162213	1.6812e-15	2.15346e-11		CTD-2034I4.2	0.165386	7.74833e-46	9.92096e-42
SRGAP2C	0.132911	3.79433e-14	4.85901e-10		MYH10	0.161982	4.97208e-08	0.000636874		SHISA5	0.16537	3.75399e-09	4.80661e-05
ATP6AP2	0.132808	1.65902e-07	0.00212454		MRPS30	0.161898	1.31253e-11	1.68121e-07		PGD	0.164502	7.28121e-08	0.000932286
NTPCR	0.132733	3.46802e-13	4.44115e-09		DHX15	0.161639	3.9393e-09	5.04585e-05		PCDH19	0.163791	6.63952e-37	8.50124e-33
OAT	0.132695	2.82124e-14	3.61288e-10		AMBN	0.161476	4.45684e-34	5.70877e-30		MAGI1	0.163742	3.66398e-22	4.69137e-18
2006-03-01	0.13212	1.53111e-07	0.00196074		PAFAH1B2	0.160683	2.35334e-10	3.01439e-06		ARIH1	0.163596	7.59332e-11	9.72249e-07
ZNF90	0.132078	1.22391e-15	1.56735e-11		SREBF2	0.159786	7.43494e-18	9.52341e-14		CDKN2AIP	0.163595	7.18229e-18	9.19621e-14
DCP1A	0.132045	3.64629e-11	4.66944e-07		DYNLL2	0.158475	1.38312e-11	1.77164e-07		WDR60	0.163455	2.26325e-09	2.89786e-05
DNER	0.131933	1.25535e-08	0.00016076		ZNF254	0.158383	3.60601e-24	4.61893e-20		FASN	0.162688	2.52342e-14	3.23099e-10
PDP1	0.131906	5.4658e-25	6.9995e-21		PCBP4	0.158376	7.76682e-07	0.00994852		FADS3	0.162228	1.05789e-20	1.35452e-16
PAFAH1B2	0.13185	9.38098e-11	1.20133e-06		ATXN2L	0.1575	1.84715e-20	2.36602e-16		CDH2	0.162152	9.96335e-08	0.00127571
FEZF1-AS1	0.131477	5.36437e-31	6.86962e-27		RPS11	0.157481	2.2541e-10	2.88727e-06		DHCR24	0.161757	3.96318e-16	5.07445e-12
CFAP20	0.131411	1.80357e-07	0.00230965		TTC19	0.157438	2.59829e-08	0.000332816		HOMER1	0.161398	1.24209e-11	1.59037e-07
STARD4	0.131115	1.85577e-19	2.3765e-15		ACTR1B	0.157394	1.69631e-13	2.1728e-09		PNPLA3	0.16137	1.03084e-14	1.31989e-10
TAGLN3	0.130869	1.09056e-11	1.39658e-07		NOVA2	0.156909	2.78266e-13	3.56431e-09		CLCN4	0.16128	1.41535e-11	1.81222e-07
CADM4	0.130805	5.26458e-09	6.74182e-05		MAGI1	0.156894	6.32471e-11	8.10133e-07		GPR82	0.161113	1.91416e-23	2.45089e-19
NAA25	0.130261	3.9481e-12	5.05593e-08		PRCC	0.156378	4.81155e-13	6.16312e-09		TRIM16	0.160942	7.36422e-13	9.42915e-09
KLHL5	0.130136	6.12612e-15	7.84511e-11		CHST10	0.156168	1.88721e-16	2.41733e-12		RBM41	0.160918	3.52819e-19	4.51749e-15
ETNK1	0.129095	8.82625e-15	1.13029e-10		G3BP1	0.156101	8.6686e-09	0.000111036		KLF10	0.160628	4.23792e-17	5.42623e-13
DNAJB9	0.128784	1.20636e-10	1.54487e-06		TET1	0.155955	8.03766e-13	1.02954e-08		CHMP2B	0.160548	5.48728e-16	7.02591e-12
BORCS7	0.128746	1.47584e-09	1.88996e-05		IFI44L	0.155684	1.20978e-12	1.54961e-08		PLXNA2	0.160532	2.24301e-08	0.000287195
ACLY	0.128528	5.70783e-10	7.30944e-06		XBP1	0.155489	2.21354e-13	2.83533e-09		RNF146	0.160523	7.17506e-11	9.18695e-07
SSBP2	0.128138	5.9067e-07	0.00756411		PIK3R3	0.155052	4.19368e-16	5.37168e-12		SYBU	0.160409	6.83865e-15	8.75621e-11
PAG1	0.128034	1.44224e-14	1.84693e-10		TNRC6A	0.155002	6.53699e-11	8.37323e-07		GRM3	0.160326	7.37615e-20	9.44442e-16
NUTM2B-AS1	0.127951	2.36922e-12	3.03402e-08		FNBP1	0.154921	2.56536e-15	3.28597e-11		HSPA1A	0.160324	2.18682e-40	2.80001e-36
FEZF1	0.127601	2.89373e-26	3.70571e-22		ERICH1	0.154843	3.06353e-14	3.92407e-10		BRWD1	0.160184	2.3073e-07	0.00295427
ACTR1A	0.12753	3.1802e-09	4.07257e-05		TYMS	0.154462	1.04255e-07	0.00133541		LDOC1	0.159919	3.2618e-08	0.00041764
CTD-2034I4.2	0.127426	3.69321e-49	4.72952e-45		CERS6	0.154249	5.04743e-11	6.46525e-07		SLITRK4	0.159443	1.20559e-24	1.54364e-20
DIAPH2	0.127337	8.3609e-24	1.0707e-19		PRPS1	0.15424	3.24944e-16	4.16221e-12		RP11-706O15.1	0.159366	1.33135e-20	1.70467e-16
HTRA1	0.12683	3.13078e-12	4.00927e-08		ZNF608	0.154024	8.44073e-12	1.08117e-07		ZNF74	0.159113	2.81233e-16	3.60091e-12
SPTSSA	0.126701	2.37238e-08	0.000303807		CHD1	0.153893	8.68494e-10	1.11245e-05		RAB5A	0.159078	4.9992e-11	6.40097e-07
CLASP2	0.126578	5.01418e-16	6.42116e-12		CUL1	0.153765	7.05967e-11	9.04273e-07		GOT2	0.159022	2.15665e-13	2.76137e-09
UNC119	0.126144	6.06267e-11	7.76386e-07		OS9	0.153748	1.44987e-09	1.85714e-05		PPM1K	0.158423	1.58374e-10	2.02782e-06
PPP1R17	0.126133	2.39166e-30	3.06276e-26		BOD1	0.153685	1.12983e-07	0.0014472		KLHL35	0.158328	3.01243e-17	3.85711e-13
ZNF430	0.125991	2.70319e-13	3.4617e-09		GOLIM4	0.15366	8.41313e-11	1.07764e-06		AGPAT4	0.158323	3.37002e-15	4.31498e-11
VEPH1	0.125678	2.90383e-10	3.71864e-06		LBH	0.153269	6.8266e-11	8.74419e-07		CEP57	0.158055	1.28208e-07	0.00164158
RAPGEF2	0.125478	1.18076e-12	1.51208e-08		DBF4	0.152953	6.97901e-11	8.93942e-07		HMBOX1	0.157905	6.87299e-28	8.80018e-24
NFKBIA	0.125372	5.15425e-09	6.60053e-05		ZNF821	0.152401	1.41961e-11	1.81838e-07		DERL1	0.157901	2.3845e-14	3.05312e-10
SNAPC1	0.12529	2.1901e-11	2.80465e-07		RAB3B	0.152393	1.62619e-21	2.08298e-17		FAM19A5	0.157822	1.61954e-69	2.07366e-65
RSBN1	0.125138	5.70271e-08	0.000730289		JPH4	0.152094	8.12692e-13	1.04098e-08		NPAS3	0.157754	1.3096e-32	1.67681e-28
LIMA1	0.124981	1.78107e-15	2.28084e-11		APOO	0.151782	5.7354e-14	7.34648e-10		RAF1	0.157746	1.92218e-10	2.46115e-06
AP1S2	0.124973	3.73346e-08	0.000478107		ZNF195	0.151753	4.60279e-11	5.89571e-07		NOVA2	0.157255	3.77241e-09	4.83019e-05
RPL27	0.12496	3.06874e-09	3.92982e-05		PTBP2	0.151531	2.93989e-14	3.7657e-10		MID1	0.157196	3.74101e-17	4.78999e-13
DDIT3	0.12473	8.31772e-15	1.06517e-10		MSH6	0.151355	5.34821e-10	6.85052e-06		VEZT	0.156935	1.73071e-09	2.216e-05
RPL35A	0.124704	1.03507e-14	1.3255e-10		KMT2C	0.150987	4.35837e-10	5.58263e-06		JUND	0.156342	1.81779e-11	2.3275e-07
ADNP	0.124345	1.97195e-09	2.52528e-05		LINC00685	0.150939	1.72745e-10	2.21269e-06		C20orf24	0.156195	3.96089e-09	5.07152e-05
MPP5	0.12414	3.2949e-13	4.21945e-09		RGS3	0.150938	9.3068e-15	1.19211e-10		SUN2	0.156161	1.23807e-13	1.58522e-09
FAT4	0.123893	1.85768e-20	2.37895e-16		DHCR24	0.15081	3.81948e-15	4.89238e-11		FGFBP3	0.155723	5.68295e-09	7.27645e-05
PHYHIPL	0.123769	8.50992e-17	1.08978e-12		STARD4-AS1	0.150789	2.31526e-13	2.96562e-09		LUC7L2	0.1551	9.12603e-10	1.1685e-05
KRTCAP2	0.123727	2.70062e-08	0.000345841		SLC25A36	0.150056	1.51338e-07	0.00193848		ZMYM5	0.15444	7.23928e-18	9.26917e-14
RAB5A	0.123621	6.63245e-09	8.49352e-05		LSAMP	0.150042	1.91739e-22	2.45599e-18		REL	0.154394	8.8482e-16	1.13292e-11
PAM	0.122943	2.62477e-10	3.36129e-06		PAXBP1	0.149888	2.99749e-10	3.83948e-06		BOD1	0.154373	3.95787e-08	0.000506765
MAPK8IP1	0.12257	8.19339e-11	1.04925e-06		PAFAH1B1	0.149765	4.34272e-07	0.00556259		SMARCC2	0.154187	7.5996e-08	0.000973053
MOB3B	0.122524	1.05022e-09	1.34492e-05		COL6A1	0.149369	9.4635e-14	1.21218e-09		EMX2	0.153865	7.47286e-12	9.56825e-08
LUC7L2	0.122523	7.60612e-08	0.000974039		EMC10	0.148583	3.56882e-09	4.5713e-05		H2AFX	0.153613	1.47457e-22	1.88804e-18
RAF1	0.122313	1.47128e-09	1.88412e-05		NAP1L3	0.148518	4.36407e-16	5.58994e-12		RIMKLB	0.152976	4.22852e-12	5.41419e-08
UPF2	0.122274	1.51667e-08	0.000194225		SVIL	0.148322	5.20663e-10	6.66917e-06		HDGF	0.152802	2.35655e-08	0.000301733
RPRM	0.122179	1.06895e-22	1.3689e-18		JAM2	0.148076	1.40701e-14	1.80224e-10		PRPSAP1	0.152729	2.05367e-08	0.000262952
OSBPL1A	0.122175	4.09769e-10	5.24751e-06		ARF6	0.148013	3.702e-11	4.7419e-07		RBM15B	0.152586	4.96508e-10	6.35728e-06
NBEAL1	0.122136	1.08317e-08	0.000138711		FO538757.2	0.147839	1.73365e-19	2.22063e-15		PGP	0.152464	7.10555e-09	9.09795e-05
GLG1	0.122121	2.49525e-08	0.000319542		HSP90AA1	0.147705	4.97867e-10	6.37717e-06		CTNNB1	0.152265	3.7088e-10	4.74875e-06
AL592183.1	0.122098	6.34932e-64	8.13094e-60		PRKCSH	0.147093	9.96121e-09	0.000127593		DEDD2	0.152264	3.90819e-17	5.00405e-13
REEP2	0.12194	1.61378e-13	2.0666e-09		HSPH1	0.14705	6.59639e-09	8.44931e-05		SREK1IP1	0.152231	6.28293e-07	0.00804466
RP11-11N9.4	0.121827	1.15144e-27	1.47454e-23		ST8SIA1	0.147046	1.70561e-26	2.18472e-22		SAT1	0.152042	1.04461e-09	1.33751e-05
MED6	0.12178	1.01747e-10	1.30298e-06		SAE1	0.147012	2.01639e-08	0.000258279		IRF2BPL	0.151919	5.80008e-07	0.00742642
ZNF83	0.121158	5.10269e-11	6.53451e-07		STOX2	0.146954	2.32858e-14	2.98267e-10		GGT7	0.151641	8.43323e-16	1.07979e-11
ARMCX1	0.1211	7.37912e-12	9.4497e-08		NFATC3	0.146905	8.29396e-19	1.06237e-14		IGSF3	0.151095	2.19089e-12	2.80522e-08
MAPRE2	0.121022	2.50687e-13	3.2103e-09		RPS15	0.146806	5.1789e-14	6.63365e-10		KIAA1107	0.151075	5.40966e-14	6.92652e-10
ARID4A	0.120761	1.79677e-07	0.00230094		DSTYK	0.145726	4.51274e-15	5.78037e-11		DCP1A	0.150994	7.80335e-12	9.99141e-08
PCF11	0.120508	7.9162e-09	0.000101375		MAPKAPK5	0.145704	1.04738e-13	1.34159e-09		FAM118A	0.150533	9.87552e-15	1.26446e-10
GPR82	0.120334	2.40447e-25	3.07916e-21		EFS	0.145627	7.2579e-14	9.29665e-10		ADGRG1	0.15053	3.00539e-13	3.8481e-09
RAB6A	0.120285	4.64905e-08	0.000595357		DLX2	0.145605	5.72632e-37	7.33484e-33		GADD45B	0.150402	9.57093e-34	1.22546e-29
THUMPD1	0.120055	8.93478e-08	0.00114419		RP11-706O15.1	0.14558	2.00411e-19	2.56707e-15		DYNLL2	0.150299	2.40377e-11	3.07779e-07
BIN1	0.120022	7.11123e-16	9.10664e-12		ERV3-1	0.145389	1.7116e-13	2.19238e-09		ELOVL5	0.150299	4.08526e-11	5.23076e-07
LRP6	0.120002	2.12763e-09	2.72464e-05		CTNND1	0.145325	2.62763e-14	3.36573e-10		C2orf80	0.15005	2.12849e-15	2.72531e-11
TMEM35	0.119949	3.18432e-12	4.07784e-08		HSF2	0.145039	3.71418e-10	4.75749e-06		DEGS1	0.149913	2.2715e-09	2.90843e-05
AKAP12	0.119902	1.97163e-07	0.00252487		ZFX	0.144916	4.60459e-25	5.89802e-21		POU2F1	0.149608	1.45581e-17	1.86401e-13
CYB5B	0.119744	9.23735e-08	0.00118294		ZNF516	0.144913	5.65348e-32	7.24154e-28		DLL1	0.149542	1.36345e-23	1.74576e-19
RND3	0.119737	2.83558e-09	3.63125e-05		RRM1	0.144776	4.90562e-09	6.28361e-05		HEXIM1	0.149387	2.50401e-16	3.20614e-12
S100A6	0.118862	3.37144e-25	4.31746e-21		ZNF385D	0.144623	6.62682e-36	8.48829e-32		TSPYL2	0.14924	1.76208e-19	2.25617e-15
RFX4	0.118729	4.30042e-08	0.000550712		ZNF622	0.144512	2.63949e-14	3.38092e-10		PSMD10	0.149036	1.10652e-09	1.41679e-05
CHD6	0.118495	2.79892e-08	0.000358429		MTA1	0.144421	8.43415e-10	1.08033e-05		IRS2	0.148467	2.91553e-11	3.73305e-07
STARD4-AS1	0.118461	3.15758e-11	4.0436e-07		USP5	0.144301	9.53653e-15	1.22153e-10		PRPS1	0.148118	1.81866e-15	2.32861e-11
ANKRD10	0.118291	1.81085e-10	2.31898e-06		SC5D	0.143993	1.63888e-12	2.09924e-08		SLC5A3	0.147517	7.00613e-18	8.97065e-14
CELF1	0.118186	3.48462e-07	0.00446241		LMO1	0.143993	1.03518e-21	1.32596e-17		NETO2	0.147296	7.18138e-09	9.19504e-05
ANKS1B	0.118112	4.12938e-21	5.28808e-17		NUSAP1	0.143717	6.99422e-07	0.00895889		MXI1	0.14712	5.31926e-07	0.00681078
PRTFDC1	0.118094	6.3352e-22	8.11286e-18		FAM92A1	0.143469	5.80539e-07	0.00743612		POR	0.147023	4.66183e-10	5.96901e-06
RORB	0.118061	6.1196e-20	7.83676e-16		CSRNP3	0.143421	7.34662e-12	9.41029e-08		LARP1B	0.146943	4.24759e-13	5.43861e-09
FLVCR1	0.118003	9.9474e-15	1.27386e-10		NSDHL	0.143037	3.66817e-18	4.69856e-14		PRDX4	0.146745	1.38783e-08	0.000177698
SPTY2D1	0.117981	4.30821e-15	5.51709e-11		PPP2R5C	0.142938	1.83837e-11	2.35477e-07		LMBR1L	0.146438	3.92286e-09	5.02283e-05
GSX2	0.117808	3.38484e-36	4.33463e-32		SRGAP1	0.142916	1.08897e-08	0.000139486		ATP1A1	0.146255	3.64682e-10	4.66939e-06
APBB2	0.117786	8.93142e-12	1.14376e-07		FLVCR1	0.142697	4.08919e-20	5.23785e-16		SIAH2	0.145735	4.04555e-12	5.17993e-08
GOT2	0.117775	1.34828e-10	1.72661e-06		ZBTB16	0.142566	4.61721e-19	5.91419e-15		LAPTM4B	0.145727	7.80255e-08	0.000999039
HNRNPA1	0.117673	1.93042e-08	0.00024721		CBX6	0.142281	1.67952e-09	2.15129e-05		YEATS4	0.14571	6.19216e-09	7.92844e-05
ATF1	0.117485	1.83287e-15	2.34717e-11		NBEAL1	0.141913	3.50524e-11	4.48986e-07		ETV1	0.14542	2.84608e-33	3.64412e-29
USP8	0.117407	1.56282e-07	0.00200135		NLGN1	0.141863	5.74426e-19	7.35782e-15		ING1	0.145414	1.34648e-15	1.72404e-11
WHAMM	0.116912	9.13383e-19	1.16968e-14		MGRN1	0.141609	1.70002e-14	2.17756e-10		FAXC	0.145357	3.05838e-13	3.91595e-09
CBWD1	0.116748	8.87291e-15	1.13626e-10		TBL1X	0.141212	1.09653e-20	1.40455e-16		PALMD	0.145099	6.33134e-11	8.10665e-07
POU3F2	0.116545	2.08732e-09	2.67302e-05		C16orf72	0.141198	4.95358e-13	6.34505e-09		RBM14	0.145079	8.06533e-15	1.03269e-10
CRABP1	0.116404	3.39476e-14	4.34733e-10		BAIAP2	0.14117	5.14011e-10	6.58397e-06		ZDHHC9	0.1449	3.69073e-18	4.72562e-14
RANGRF	0.116215	5.13671e-08	0.000657807		RCC2	0.141028	4.02967e-18	5.1616e-14		SYT4	0.144678	1.17602e-07	0.00150578
PCDH9	0.116172	4.4201e-13	5.66038e-09		MACF1	0.140887	3.88832e-08	0.000498055		DTNA	0.144452	2.9494e-19	3.77641e-15
CAT	0.115994	2.52167e-59	3.22925e-55		C16orf87	0.140594	1.11126e-07	0.00142341		NSDHL	0.14439	1.16369e-15	1.48999e-11
NSMCE3	0.115868	7.36313e-09	9.42923e-05		TRAPPC6A	0.140503	1.25324e-15	1.60527e-11		RPS6KL1	0.144343	4.1735e-08	0.000534375
PGM2L1	0.115782	2.65198e-14	3.39613e-10		SOX21	0.140418	1.19262e-20	1.52763e-16		C1orf216	0.144272	2.61786e-12	3.3519e-08
ARX	0.115769	6.62351e-10	8.48207e-06		DHX9	0.139881	5.74506e-09	7.35885e-05		KIAA0895L	0.144178	1.02322e-12	1.31012e-08
LIPG	0.115629	8.3774e-24	1.07281e-19		GLI3	0.139706	2.26336e-12	2.89914e-08		FAM127B	0.143806	1.16919e-07	0.00149703
KIAA1715	0.11528	5.7773e-12	7.39841e-08		ZSWIM6	0.139599	5.47645e-24	7.01479e-20		AIFM1	0.143531	1.49198e-15	1.91034e-11
CD276	0.115207	2.12317e-14	2.71894e-10		ITM2C	0.139461	3.36333e-10	4.30809e-06		MAP9	0.143231	2.00057e-07	0.00256153
LAMP5	0.11485	1.00038e-29	1.28109e-25		TMEM70	0.139069	4.14596e-12	5.31056e-08		PCDH11X	0.14315	4.0352e-37	5.16666e-33
LMO1	0.114783	3.84567e-13	4.92476e-09		CYB5R3	0.138866	4.25937e-08	0.000545582		PEX5	0.142981	1.43138e-19	1.83274e-15
PPAT	0.11476	7.30643e-12	9.35662e-08		PHF5A	0.138739	7.93236e-08	0.00101606		SYNC	0.142823	9.84344e-11	1.26035e-06
PTPRN2	0.11467	1.84658e-55	2.36473e-51		PGM2L1	0.138717	7.2139e-07	0.00924028		NUP93	0.142697	3.47285e-11	4.44664e-07
SUN1	0.114258	1.77202e-12	2.26924e-08		FASN	0.138242	8.99269e-16	1.15187e-11		TMEM57	0.142125	5.24483e-07	0.00671549
RPS16	0.114161	7.06732e-13	9.05041e-09		ZMYM5	0.137758	9.88931e-15	1.26672e-10		SMARCA1	0.142038	2.69971e-09	3.45671e-05
TNIP1	0.113793	2.56116e-11	3.27983e-07		THAP11	0.137691	6.40106e-10	8.19912e-06		MIDN	0.141719	4.11092e-07	0.00526363
KDM5C	0.11327	7.74309e-21	9.9158e-17		PABPC4	0.137602	8.11858e-12	1.03991e-07		PNPLA4	0.141624	9.82957e-35	1.25858e-30
CORO1C	0.11322	1.0553e-11	1.35141e-07		GDAP1L1	0.137372	1.91327e-07	0.00245071		SAP30BP	0.141545	1.02134e-10	1.30773e-06
NRP1	0.113178	3.95425e-39	5.06381e-35		ACIN1	0.137173	1.93228e-07	0.00247505		CXCL12	0.141442	8.40441e-25	1.0761e-20
DERL3	0.112797	6.60753e-28	8.4616e-24		MYCN	0.137107	4.0261e-12	5.15704e-08		GSK3A	0.141092	1.26126e-12	1.61492e-08
RPS29	0.112365	6.00289e-09	7.6873e-05		CNTLN	0.137074	5.92318e-08	0.0007587		GABRG2	0.140913	8.70855e-10	1.11504e-05
ACSS2	0.111775	2.17652e-20	2.78726e-16		IGDCC3	0.137053	3.51239e-07	0.00449902		GOPC	0.140912	4.34553e-07	0.00556402
RPL36	0.111772	1.00332e-08	0.000128486		SF3A2	0.136885	2.31189e-12	2.96131e-08		RORB	0.14042	3.50247e-23	4.48456e-19
LRRC4C	0.111744	3.75044e-28	4.80281e-24		ATXN2	0.136872	2.64998e-11	3.39436e-07		SLC8A1	0.140333	2.84178e-08	0.000363862
TSC22D2	0.11089	2.30094e-15	2.94658e-11		GTF2H2	0.136829	1.91201e-18	2.4491e-14		FAM117B	0.140213	1.27611e-17	1.63393e-13
NAA16	0.110679	2.69687e-09	3.45361e-05		LINC00632	0.13614	1.04437e-08	0.000133774		MAPK10	0.140114	4.64854e-09	5.95199e-05
COL4A2	0.11064	2.84941e-09	3.64896e-05		EPHA3	0.136039	5.88909e-21	7.54333e-17		MAX	0.13992	5.49508e-13	7.0359e-09
RP11-553L6.5	0.110616	1.45003e-18	1.8569e-14		AAK1	0.135994	9.0688e-09	0.000116162		PTPRD	0.139206	4.80394e-09	6.15096e-05
FADS3	0.11028	3.02786e-18	3.87748e-14		GAS1	0.13586	1.66381e-15	2.13117e-11		WASF1	0.13915	2.61552e-07	0.00334892
ASGR1	0.109922	1.01547e-15	1.30041e-11		CS	0.135555	8.86961e-16	1.13611e-11		A1BG	0.139107	1.32676e-10	1.69879e-06
MITF	0.109814	5.70007e-29	7.29951e-25		TCF7	0.135289	1.17508e-14	1.50515e-10		NUCB1	0.138866	3.18849e-12	4.08254e-08
HKR1	0.10976	1.90253e-35	2.43638e-31		SLC16A2	0.135047	9.74101e-20	1.24773e-15		DMD	0.138473	1.62408e-13	2.07947e-09
ATP1A1	0.109695	2.32122e-07	0.00297256		DNAJC12	0.134768	2.89561e-13	3.70899e-09		RAB4B	0.138427	2.40803e-13	3.08324e-09
NSDHL	0.109679	2.20387e-13	2.82227e-09		DCP1A	0.134741	1.54195e-10	1.97509e-06		MYLIP	0.138377	1.57146e-18	2.0121e-14
RPS24	0.109615	7.9012e-15	1.01183e-10		QPRT	0.134464	6.46067e-15	8.27547e-11		SMCR5	0.138254	1.88007e-17	2.40724e-13
TMEM263	0.109432	1.66406e-11	2.131e-07		NRP1	0.134235	2.12362e-29	2.72014e-25		REM2	0.13823	1.97405e-18	2.52757e-14
TDG	0.109032	4.88907e-07	0.00626094		CTB-50L17.10	0.133838	3.10163e-08	0.000397288		EEF2	0.138084	5.56277e-10	7.12258e-06
FGFR2	0.108975	3.04916e-11	3.90475e-07		SGTA	0.133615	5.35827e-10	6.86341e-06		KIF1BP	0.137884	5.09628e-12	6.52528e-08
ZMYM5	0.108963	1.19894e-13	1.53536e-09		PTPN12	0.133466	9.29318e-10	1.19036e-05		RASAL2	0.137855	6.47176e-12	8.28644e-08
NGDN	0.108734	4.04928e-07	0.00518551		RPL35	0.133259	1.58623e-07	0.00203181		SCAI	0.137773	1.28718e-11	1.6481e-07
RAB5B	0.108678	9.00626e-13	1.15334e-08		GPR161	0.13249	4.94025e-13	6.32797e-09		AAMP	0.137622	2.90816e-09	3.72361e-05
LINC00657	0.108245	6.99902e-08	0.000896295		MTMR4	0.132466	7.7017e-09	9.86511e-05		NLGN4X	0.137522	3.04668e-23	3.90097e-19
RP3-525N10.2	0.108238	5.87848e-07	0.00752798		NTRK3	0.13234	5.47208e-14	7.00919e-10		FLVCR1	0.13752	4.60778e-18	5.8998e-14
C1orf52	0.108168	1.48118e-07	0.0018968		FGD4	0.132325	5.6297e-10	7.21109e-06		SRGAP2B	0.137273	3.32822e-10	4.26146e-06
ING3	0.10816	1.38745e-08	0.000177677		ANK3	0.132215	3.09358e-08	0.000396257		MLH3	0.137239	2.10082e-19	2.68989e-15
CROT	0.107624	8.16973e-12	1.04622e-07		YAF2	0.131622	1.72649e-08	0.000221146		QARS	0.137211	8.41393e-10	1.07732e-05
IFI6	0.10717	1.28918e-09	1.65093e-05		ZDHHC9	0.131595	8.94483e-20	1.14574e-15		DERA	0.137147	4.38775e-14	5.61808e-10
GORASP2	0.107121	1.50067e-08	0.000192176		GPATCH8	0.131549	5.00328e-07	0.0064087		ACVR2A	0.137075	8.48726e-12	1.08671e-07
KAT6A	0.10707	1.77189e-08	0.000226908		URI1	0.131446	4.17397e-07	0.00534644		MANF	0.136911	6.03451e-10	7.72658e-06
JMJD6	0.106928	3.31855e-15	4.24973e-11		ATCAY	0.131192	8.86027e-08	0.00113491		AKIRIN2	0.136811	7.84065e-08	0.00100392
TSPAN7	0.10677	9.15176e-09	0.000117197		IGF2BP1	0.130934	9.37836e-12	1.20127e-07		WAC-AS1	0.13652	4.93904e-09	6.32394e-05
TMEM159	0.106581	2.19838e-18	2.81525e-14		UBQLN1	0.130913	1.58645e-08	0.000203209		SH3GL3	0.13651	2.76239e-14	3.53697e-10
YWHAG	0.106318	2.11697e-07	0.00271099		HELLS	0.130784	5.94679e-10	7.61725e-06		LRRC47	0.136293	3.88867e-08	0.000497905
HS6ST2	0.106167	2.42156e-10	3.10105e-06		PCSK7	0.130429	5.14951e-11	6.59601e-07		ZNF131	0.136288	3.48473e-07	0.00446184
BMP7	0.105927	6.22871e-08	0.000797649		CLIP1	0.130354	2.44921e-09	3.13719e-05		ERICH1	0.136275	1.60288e-09	2.05232e-05
C11orf96	0.10583	1.2179e-37	1.55965e-33		CSNK1D	0.130135	2.32843e-12	2.98248e-08		LARP6	0.136149	1.92823e-14	2.46891e-10
NR2F2	0.105735	8.70783e-08	0.00111513		LBR	0.130086	1.03909e-09	1.33097e-05		SEC61A2	0.135955	2.2633e-13	2.89793e-09
SLC25A26	0.10572	7.16698e-07	0.00917804		HMBOX1	0.129621	1.81526e-17	2.32517e-13		CARKD	0.135904	1.49587e-17	1.91531e-13
TMEM55B	0.105666	4.23031e-10	5.41733e-06		C1orf52	0.129209	1.68752e-08	0.000216154		MYC	0.135904	7.89631e-28	1.01104e-23
TMED3	0.105577	2.53011e-08	0.000324006		MEST	0.128937	4.62586e-07	0.00592527		MNAT1	0.135845	3.17096e-09	4.0601e-05
RAP2C	0.105482	6.67875e-17	8.5528e-13		LARP1	0.128726	1.3668e-09	1.75073e-05		RUNDC3B	0.135719	1.51228e-13	1.93633e-09
KANSL2	0.105431	1.89558e-11	2.42748e-07		BIN1	0.128722	8.86354e-16	1.13533e-11		PCP4	0.135612	1.47186e-09	1.88457e-05
EEA1	0.105236	2.11497e-08	0.000270843		GFOD2	0.128585	8.00275e-11	1.02507e-06		RGS3	0.13538	1.15265e-10	1.47586e-06
PID1	0.104925	2.47649e-33	3.17139e-29		POGZ	0.128385	9.91339e-10	1.26981e-05		TOMM40	0.13488	7.22874e-07	0.00925568
ZNF37A	0.104721	1.38987e-09	1.77987e-05		GNG2	0.12829	5.25649e-09	6.73303e-05		RAB5B	0.134752	1.39868e-15	1.79087e-11
ARHGDIA	0.104244	2.13241e-07	0.00273076		EEF1A1	0.128127	9.16226e-11	1.17359e-06		ANKRD36B	0.13467	2.09704e-14	2.68505e-10
B4GAT1	0.10404	6.64541e-08	0.000851011		ZRSR2	0.127943	4.25279e-21	5.4474e-17		TNR	0.134329	1.40783e-26	1.80259e-22
EMP2	0.104033	3.12726e-08	0.000400477		MGST1	0.127541	4.13015e-21	5.29031e-17		PPFIBP1	0.133816	1.17121e-14	1.49961e-10
LPCAT4	0.10403	1.10763e-19	1.41843e-15		SRRT	0.127505	5.48143e-11	7.02116e-07		SPG7	0.133667	2.50598e-10	3.20866e-06
FAM53C	0.103895	6.16356e-08	0.000789305		LRCH2	0.127402	2.41997e-14	3.09974e-10		ATXN2L	0.13364	9.76583e-15	1.25042e-10
NMT1	0.103761	6.59188e-10	8.44156e-06		ORAI2	0.127264	3.86054e-12	4.94497e-08		GNL3	0.133592	5.70066e-08	0.000729913
ZNF516	0.103549	1.19329e-23	1.52813e-19		ZNF92	0.127053	1.50246e-13	1.9245e-09		STAT3	0.133448	1.6821e-11	2.15376e-07
ZNF791	0.103544	1.01555e-07	0.00130051		SNRPA	0.127025	6.15735e-07	0.00788695		MMAB	0.132774	2.11525e-11	2.70837e-07
ARFGAP2	0.103419	1.48892e-07	0.00190671		C4orf46	0.126928	5.912e-15	7.57269e-11		GDE1	0.132548	2.03935e-08	0.000261118
ADAMTS9	0.103273	1.2507e-17	1.60165e-13		PUDP	0.126924	1.38828e-19	1.77825e-15		NCALD	0.131848	1.08137e-14	1.38459e-10
PTX3	0.103124	3.69804e-19	4.73571e-15		PNMA1	0.126875	7.57156e-07	0.00969841		RFTN1	0.131625	7.33467e-27	9.39131e-23
PRRC2B	0.10306	4.04942e-07	0.00518569		SSBP3	0.126859	1.59888e-08	0.0002048		ASCL1	0.131065	5.59693e-29	7.16631e-25
NDRG4	0.102937	1.38627e-12	1.77526e-08		POLDIP3	0.126701	9.89757e-11	1.26778e-06		NMRAL1	0.130917	6.64231e-25	8.50482e-21
RAB3B	0.102904	1.98599e-11	2.54326e-07		DEDD2	0.126615	1.43205e-14	1.83431e-10		RP11-192H23.6	0.130552	1.28901e-10	1.65044e-06
ADGRB3	0.102885	1.39791e-09	1.79016e-05		CTPS1	0.126396	5.80591e-12	7.43679e-08		PDP1	0.130486	1.67798e-11	2.14848e-07
PDCD6IP	0.10286	2.40717e-09	3.08262e-05		ATF1	0.126311	1.23206e-17	1.57815e-13		ATAD1	0.13006	2.7608e-08	0.000353493
AP006222.2	0.102757	1.81618e-14	2.3258e-10		VANGL2	0.126134	6.98725e-14	8.94996e-10		ZNF562	0.130025	5.57098e-18	7.13309e-14
SYNC	0.10258	2.98682e-08	0.000382492		BIRC5	0.125956	3.87982e-08	0.000496966		HSF2	0.129976	5.29195e-08	0.000677582
DLX1	0.102575	1.42314e-32	1.82248e-28		LRRN1	0.125913	1.19027e-08	0.000152462		CMBL	0.129921	1.90611e-09	2.44058e-05
TKTL1	0.102377	1.61704e-15	2.07079e-11		RAP2C	0.12587	6.41622e-24	8.21853e-20		BAZ2B	0.129834	5.97653e-08	0.000765235
BAIAP2	0.102325	9.39052e-10	1.20255e-05		HERC2	0.125744	5.60018e-10	7.17327e-06		MCMBP	0.129768	1.0762e-14	1.37797e-10
SMAD4	0.102313	1.17978e-10	1.51082e-06		MTMR9	0.12557	1.48729e-10	1.90507e-06		CORO7	0.12972	3.08024e-16	3.94393e-12
PHTF2	0.102154	5.43419e-13	6.95903e-09		RNASEH2A	0.125233	2.93222e-09	3.75588e-05		PTPRO	0.129645	1.67768e-10	2.1481e-06
STAT3	0.101839	9.85927e-09	0.000126258		SFSWAP	0.1247	2.17572e-09	2.78687e-05		WNT7A	0.129625	6.15812e-20	7.88485e-16
SEC22C	0.101765	1.06636e-08	0.000136558		SIGIRR	0.124459	1.01211e-19	1.29642e-15		CHKA	0.129422	1.77549e-10	2.27333e-06
MAP1A	0.101651	1.16306e-08	0.000148942		FBXO5	0.124326	2.75412e-12	3.52775e-08		SERTAD1	0.128985	9.94625e-22	1.27352e-17
ANKHD1	0.101619	2.83516e-17	3.63071e-13		CAPN2	0.124186	6.5704e-12	8.41603e-08		MANBAL	0.128872	4.13972e-11	5.3005e-07
CLDND1	0.101532	1.27843e-07	0.00163716		FOXN3	0.123982	4.34982e-10	5.57169e-06		TRPC4AP	0.128451	4.04073e-10	5.17375e-06
KC6	0.101439	2.08895e-47	2.67511e-43		SH3RF1	0.123923	1.15762e-13	1.48279e-09		GABBR2	0.128336	1.19008e-12	1.52378e-08
MAFF	0.101109	1.69313e-16	2.16822e-12		DHFR	0.123895	4.06502e-11	5.20688e-07		R3HDM1	0.128157	1.2176e-08	0.000155902
KIAA0319L	0.101083	1.1359e-09	1.45463e-05		MAP2K3	0.123866	4.86181e-19	6.22749e-15		SYT13	0.127776	5.8396e-10	7.47703e-06
UNC50	0.101061	1.11652e-07	0.00142981		LMO3	0.123859	3.05155e-22	3.90873e-18		TMEM192	0.127435	1.17601e-09	1.50577e-05
GULP1	0.100961	8.69754e-08	0.00111381		FOS	0.12374	1.97341e-08	0.000252774		FOXO3	0.127323	3.50729e-07	0.00449073
NCK1	0.100888	2.36521e-08	0.000302888		NSMCE3	0.123149	2.13832e-09	2.73898e-05		PCYT2	0.127236	3.41652e-13	4.37452e-09
RGS2	0.100736	6.7506e-13	8.64481e-09		CRTAP	0.123082	9.41472e-16	1.20593e-11		SYNJ2BP	0.127225	2.00641e-07	0.00256901
ZDHHC9	0.100391	6.33128e-14	8.10783e-10		TFAP2C	0.122942	1.43221e-11	1.83452e-07		SUMF2	0.127065	1.4325e-09	1.83418e-05
SH3RF1	0.100366	5.58252e-11	7.14897e-07		USP42	0.122831	2.78385e-15	3.56583e-11		PID1	0.126645	4.0177e-23	5.14427e-19
MAP7D1	0.100204	8.7649e-08	0.00112243		MPZL1	0.122815	8.59412e-10	1.10082e-05		KBTBD6	0.126353	3.63843e-09	4.65865e-05
ACTR1B	0.100017	6.72771e-07	0.0086155		AKAP17A	0.122494	9.60624e-11	1.23046e-06		MIR181A1HG	0.126343	7.50185e-22	9.60537e-18
PRKRIP1	0.0999873	1.14161e-09	1.46195e-05		MCMBP	0.122487	1.44483e-13	1.85068e-09		XBP1	0.12629	5.12039e-14	6.55615e-10
SF3A2	0.0998815	5.87003e-08	0.000751716		ZNF37A	0.122431	3.31822e-14	4.25031e-10		NCKAP5L	0.126148	6.05246e-14	7.74957e-10
FAM219A	0.0998049	2.30618e-10	2.95329e-06		MED13L	0.122326	2.2984e-12	2.94402e-08		KANSL1	0.125646	1.61585e-11	2.06893e-07
DYNLL2	0.0997	1.81749e-07	0.00232747		ZNF562	0.122228	3.40152e-19	4.35701e-15		YAF2	0.125611	4.29332e-07	0.00549717
PRPF8	0.0996209	9.10639e-09	0.000116616		SMARCC2	0.122088	3.15445e-08	0.000404054		ZNF738	0.125514	6.32566e-10	8.09937e-06
LRRC1	0.0995877	7.83978e-10	1.00396e-05		ZNF738	0.122048	6.66947e-08	0.000854292		TDRKH	0.125336	4.29221e-26	5.49574e-22
KANSL1	0.0995018	1.58727e-09	2.03265e-05		KDM5C	0.121951	4.3112e-24	5.52222e-20		SYNGAP1	0.125292	2.91295e-12	3.72974e-08
LEAP2	0.0993888	4.6674e-12	5.97707e-08		ECSIT	0.121855	3.78376e-10	4.84661e-06		ZFAND2A	0.125127	9.38713e-15	1.20193e-10
DSTYK	0.0993268	3.64262e-09	4.66473e-05		TCEAL3	0.121776	1.74069e-08	0.000222965		THUMPD1	0.125117	8.05471e-08	0.00103132
SIRT2	0.0991247	3.36073e-09	4.30375e-05		SLC1A6	0.121635	3.67699e-18	4.70986e-14		ZNF669	0.12504	2.93778e-11	3.76153e-07
FBXO33	0.0989821	4.97386e-10	6.36953e-06		GNAQ	0.12155	6.63965e-08	0.000850473		LRCH2	0.125026	1.24243e-09	1.59081e-05
RAB3IP	0.0988495	3.54861e-11	4.54435e-07		R3HDM2	0.121481	3.02619e-07	0.00387624		C1orf35	0.124633	6.61642e-10	8.47167e-06
FAM179B	0.0987611	2.19281e-11	2.80811e-07		LRRC41	0.121304	4.79294e-12	6.13928e-08		GART	0.124601	1.53861e-11	1.97004e-07
MFSD14A	0.0987419	1.95258e-10	2.50047e-06		C12orf65	0.121238	5.03404e-08	0.000644811		KCNK12	0.124535	4.97514e-16	6.37018e-12
FNBP1	0.097941	4.73651e-10	6.06557e-06		NCKAP5L	0.121123	2.15569e-15	2.76123e-11		ZNF322	0.124457	8.68071e-10	1.11148e-05
RP11-706O15.1	0.0975769	6.09713e-12	7.80799e-08		ERO1B	0.120995	4.11152e-14	5.26645e-10		GPR85	0.124143	1.79005e-09	2.29198e-05
PLA2G3	0.0975085	2.98562e-31	3.82338e-27		UBN1	0.120982	2.93196e-08	0.000375555		ZNF92	0.124103	8.44374e-12	1.08114e-07
IL33	0.0974028	1.3649e-15	1.74789e-11		LRP6	0.120911	2.80588e-11	3.59405e-07		PCDHB9	0.124097	2.31791e-20	2.96786e-16
CSPG5	0.0969797	6.45307e-13	8.2638e-09		NKAIN3	0.12053	3.99974e-09	5.12326e-05		MAFG	0.123982	8.55791e-09	0.000109575
NR1D2	0.0967072	1.03024e-12	1.31933e-08		KNSTRN	0.120511	7.22127e-13	9.24973e-09		CDC42EP4	0.123892	2.77332e-13	3.55096e-09
DHRS4	0.0964665	4.50731e-33	5.77206e-29		CYB5B	0.120421	2.09664e-08	0.000268559		RNF41	0.123781	1.20369e-08	0.000154121
RTN1	0.0963575	3.13751e-10	4.0179e-06		CXCR4	0.12042	3.22156e-09	4.1265e-05		CHN1	0.123498	3.64575e-12	4.66802e-08
MAOA	0.0962438	1.75003e-22	2.24109e-18		CLASP2	0.120315	2.52504e-10	3.23433e-06		AHDC1	0.123493	4.39936e-11	5.63294e-07
IFI16	0.0961458	5.36426e-24	6.86947e-20		RIMKLB	0.120207	1.80467e-12	2.3116e-08		PLPPR5	0.123413	4.61587e-13	5.91016e-09
CNTNAP3B	0.0961138	1.29464e-12	1.65791e-08		GATAD1	0.120149	2.5332e-10	3.24478e-06		RUSC1	0.123374	1.59154e-07	0.00203781
TMEM167B	0.0960485	1.52665e-09	1.95503e-05		RPS29	0.119921	3.8782e-07	0.00496759		UBE2Z	0.123348	3.78573e-12	4.84725e-08
YBEY	0.0956073	2.6017e-08	0.000333174		ZNF791	0.119878	1.13835e-07	0.00145811		RP11-182L21.6	0.12316	6.97371e-13	8.92914e-09
GUCA1A	0.0953182	8.59558e-24	1.10075e-19		FGF13	0.119868	2.06085e-13	2.63975e-09		KANSL2	0.122398	8.72841e-14	1.11759e-09
CHL1	0.0951093	8.36053e-49	1.07065e-44		IMPAD1	0.119816	2.13345e-14	2.73274e-10		ALKBH3	0.122063	8.26693e-30	1.0585e-25
ANKRD28	0.0950267	5.60308e-14	7.17531e-10		CENPK	0.119648	3.46232e-13	4.43489e-09		SLC35A1	0.121836	5.20699e-13	6.66703e-09
BAG3	0.0950264	1.45888e-16	1.86825e-12		ETNK1	0.119387	5.87802e-09	7.52916e-05		PRRT1	0.121734	5.18419e-12	6.63784e-08
PMP2	0.0950035	1.39223e-26	1.78288e-22		OLFM3	0.119267	5.97427e-21	7.65244e-17		NDUFAF1	0.121699	2.65908e-18	3.40469e-14
TMEM206	0.0949248	1.44386e-07	0.00184901		RHNO1	0.119183	4.08106e-09	5.22743e-05		CWC25	0.121598	1.85011e-09	2.36888e-05
ZNF254	0.0947914	6.79822e-15	8.7058e-11		SSH2	0.119126	8.50475e-17	1.08937e-12		BBX	0.121428	4.06455e-07	0.00520425
CREBRF	0.0946454	2.62265e-13	3.35857e-09		NETO2	0.119023	1.21948e-07	0.00156203		TOB2	0.121266	2.18248e-10	2.79445e-06
RBM41	0.0945687	8.20976e-10	1.05134e-05		PFKL	0.119012	1.97869e-10	2.53451e-06		KDM5C	0.121212	4.65178e-19	5.95614e-15
C3orf58	0.0945305	8.77364e-14	1.12355e-09		ATF7IP	0.118947	3.24133e-07	0.00415182		TSC22D2	0.12098	1.32362e-13	1.69476e-09
PPP1R15A	0.0944538	7.20433e-07	0.00922586		HCFC1	0.118943	6.8344e-14	8.75419e-10		ERGIC1	0.120927	1.00459e-08	0.000128627
CFLAR	0.0941348	2.36962e-27	3.03454e-23		CCDC144NL-AS1	0.118845	1.41152e-08	0.000180801		TBC1D12	0.12088	7.74311e-11	9.91428e-07
PRNP	0.0940983	9.81802e-12	1.2573e-07		ANKRD36C	0.11876	2.72183e-09	3.48639e-05		FAM53C	0.120838	1.22645e-10	1.57035e-06
PVRL2	0.0940204	2.88462e-09	3.69405e-05		PTK2	0.118417	6.51189e-10	8.34108e-06		TBRG1	0.120592	3.16669e-08	0.000405463
ZNF639	0.0939091	2.20457e-07	0.00282317		FAM117B	0.118134	3.86424e-16	4.9497e-12		CACNB3	0.120556	3.19266e-08	0.000408788
KLHDC8A	0.0938511	1.12999e-08	0.000144706		SNHG8	0.118004	7.75895e-10	9.93844e-06		F2R	0.120511	5.40689e-09	6.92298e-05
SNRNP48	0.093493	1.9151e-08	0.000245248		IMMT	0.117944	3.20754e-08	0.000410854		ISG20L2	0.120314	1.31262e-11	1.68067e-07
PPP2CB	0.0934592	3.68283e-07	0.00471623		DAZAP2	0.117818	4.75352e-07	0.00608878		ZNF618	0.120231	2.85551e-14	3.6562e-10
GYG2	0.0934251	1.04211e-22	1.33453e-18		BRD9	0.117346	8.06608e-09	0.000103318		KCTD13	0.120119	6.45878e-16	8.26982e-12
NUFIP2	0.0933517	4.38573e-07	0.00561636		PBK	0.117202	1.0726e-08	0.000137389		CAMKK2	0.119989	2.38519e-09	3.054e-05
ZNF562	0.0932608	7.00752e-19	8.97383e-15		UCP2	0.117187	7.70168e-08	0.000986509		ZC4H2	0.119787	2.49392e-10	3.19321e-06
NPY	0.0932255	2.58124e-30	3.30554e-26		CHCHD6	0.117163	6.60519e-08	0.000846058		ZNF254	0.119585	4.20729e-17	5.38702e-13
MPZL1	0.093144	5.48244e-07	0.00702081		MFSD14A	0.117031	4.42742e-14	5.67108e-10		BORCS6	0.119479	6.65164e-20	8.51676e-16
ZSWIM6	0.0931153	1.83101e-16	2.34479e-12		AIFM1	0.116836	4.56982e-15	5.85348e-11		RASA4	0.119455	8.00027e-12	1.02436e-07
LRRC41	0.0929452	3.15367e-07	0.00403858		RABGGTB	0.116605	1.46105e-10	1.87146e-06		PDGFC	0.119368	4.19689e-09	5.37369e-05
MTMR9	0.0927477	1.3922e-08	0.000178285		RSRC1	0.116555	2.47974e-10	3.1763e-06		THOC3	0.119242	3.24054e-13	4.14919e-09
INSIG2	0.0927206	3.95092e-08	0.000505954		EMC9	0.116554	1.2113e-14	1.55156e-10		PEX6	0.119199	3.33131e-17	4.26542e-13
HK1	0.0925065	2.6616e-08	0.000340844		POU2F1	0.116486	2.8968e-11	3.71051e-07		CEP295	0.119146	1.07173e-15	1.37224e-11
RNASET2	0.0923906	1.29571e-07	0.00165929		DDX3X	0.116368	3.89129e-07	0.00498435		PIM2	0.118948	9.27559e-27	1.18765e-22
C1orf54	0.0923335	4.97246e-09	6.36774e-05		REL	0.116248	2.73021e-14	3.49713e-10		ZCCHC12	0.118816	6.76932e-13	8.66743e-09
SPATA7	0.0922465	6.08718e-10	7.79524e-06		DDX39A	0.116144	1.03902e-07	0.00133087		FAM172A	0.118805	7.63024e-08	0.000976976
RASA4	0.0920825	2.00621e-11	2.56916e-07		HIPK2	0.11582	4.13626e-09	5.29813e-05		DDOST	0.118658	2.89082e-09	3.70141e-05
CAMK2G	0.0920608	7.04732e-09	9.0248e-05		ZNF74	0.115699	4.47735e-11	5.73504e-07		DUSP4	0.118548	9.27842e-08	0.00118801
ARMCX6	0.0918698	2.04348e-07	0.00261688		ZCCHC3	0.115685	8.07365e-11	1.03415e-06		AKAP17A	0.118359	2.57991e-09	3.30332e-05
RP11-356J5.12	0.0917434	1.67632e-17	2.1467e-13		LEF1	0.115671	1.4111e-12	1.80747e-08		KRTCAP2	0.118335	1.85385e-07	0.00237367
TMED7	0.0916782	2.17247e-09	2.78207e-05		DLK1	0.115621	2.95009e-07	0.00377877		THAP11	0.118274	6.88586e-07	0.00881665
GRID2	0.091373	8.75974e-18	1.12177e-13		LIN7A	0.115379	1.16305e-18	1.48975e-14		SLC25A29	0.11813	3.06693e-07	0.00392689
HEXB	0.0910741	4.41365e-09	5.65211e-05		ZFP1	0.115343	8.45252e-13	1.08268e-08		SLC35A2	0.118045	1.15804e-18	1.48275e-14
LTBP1	0.0909503	4.02732e-08	0.000515739		BARD1	0.115304	2.11028e-11	2.70305e-07		CMC2	0.117572	4.444e-07	0.0056901
PDLIM5	0.0907647	6.47669e-07	0.00829404		MLXIP	0.115258	2.45366e-12	3.1429e-08		GLS	0.117563	1.11223e-12	1.42409e-08
SLC8A1	0.0906587	1.66951e-16	2.13798e-12		KDM5A	0.115253	1.03125e-07	0.00132093		MN1	0.116839	6.60855e-10	8.46158e-06
CDKN2AIP	0.0905689	5.04704e-08	0.000646324		SHB	0.115001	3.36352e-09	4.30833e-05		ATP9A	0.116763	4.39053e-09	5.62164e-05
LDB2	0.0904449	2.70245e-10	3.46076e-06		ZMIZ1	0.114744	3.85115e-11	4.93294e-07		SGK1	0.116709	2.67664e-13	3.42717e-09
CRTAP	0.0904394	1.89567e-07	0.00242759		SUN2	0.114678	5.63966e-11	7.22384e-07		UCP2	0.116504	4.85553e-09	6.21703e-05
RPL28	0.0904301	2.23205e-07	0.00285837		CHORDC1	0.114536	3.84423e-08	0.000492408		USP9X	0.115739	2.9362e-07	0.00375951
TCF7	0.0904215	7.84729e-08	0.00100492		RBMXL1	0.114515	2.74404e-12	3.51484e-08		NR2F2-AS1	0.115515	3.42871e-26	4.39013e-22
LIN7A	0.0903417	1.98879e-15	2.54684e-11		HJURP	0.11446	5.10202e-14	6.53518e-10		B3GAT3	0.115377	3.87683e-09	4.96389e-05
AC098973.2	0.0903415	1.01147e-44	1.29528e-40		USP8	0.114182	5.24958e-07	0.00672418		EIF3J-AS1	0.115352	1.44975e-14	1.85626e-10
AC240274.1	0.090225	3.11365e-17	3.98734e-13		KRTCAP2	0.11415	6.51988e-07	0.00835131		ZNF558	0.115253	1.32407e-46	1.69534e-42
CS	0.0901133	1.88012e-07	0.00240769		HDAC9	0.11414	2.3273e-09	2.98103e-05		CBWD1	0.115085	3.59023e-12	4.59693e-08
GRIA1	0.0900947	8.01757e-20	1.02673e-15		EP300	0.114122	3.3354e-11	4.27232e-07		SH3GL1	0.114962	3.51205e-09	4.49683e-05
NMRAL1	0.0898596	1.89868e-21	2.43144e-17		UBTD2	0.114074	6.81944e-12	8.73502e-08		RND1	0.114955	4.28159e-17	5.48214e-13
ATP2B4	0.0897715	2.14004e-08	0.000274054		ZNF131	0.113936	1.78014e-08	0.000228018		CREG1	0.114867	9.40163e-12	1.20378e-07
ITGB8	0.0894403	3.18382e-08	0.00040772		AL592183.1	0.113765	3.00064e-45	3.84352e-41		ZBTB16	0.114802	1.18595e-18	1.51849e-14
EXT2	0.0891704	6.29381e-10	8.05985e-06		AMOTL2	0.11369	2.66534e-12	3.41404e-08		ZNF37A	0.114783	2.22024e-11	2.84279e-07
LRCH2	0.0890246	1.47563e-15	1.88969e-11		PVRL2	0.113479	9.64339e-10	1.23522e-05		SKIDA1	0.114769	1.87687e-18	2.40314e-14
SMG1	0.0885652	9.28405e-08	0.00118891		PIM1	0.113468	4.875e-14	6.24439e-10		LTBP4	0.114717	1.64028e-08	0.000210021
GATM	0.0885488	6.14708e-10	7.87195e-06		IPO7	0.113291	1.22529e-08	0.000156947		DNM1	0.114428	9.41073e-12	1.20495e-07
FAM13B	0.0884107	3.87251e-13	4.95914e-09		CAPNS1	0.113192	3.87145e-10	4.95894e-06		KLHL2	0.114327	2.51995e-13	3.22654e-09
CSRNP3	0.0883889	1.76892e-11	2.26528e-07		SRGAP2C	0.113102	8.30236e-12	1.06345e-07		LRRC7	0.114219	1.12122e-07	0.00143561
PNPLA8	0.0883539	3.17478e-08	0.000406562		KLF10	0.113101	1.8073e-16	2.31497e-12		NRDE2	0.114143	1.60167e-10	2.05078e-06
RRAGD	0.0882641	3.74179e-07	0.00479173		ST8SIA2	0.112869	8.06696e-12	1.0333e-07		GRIA3	0.11392	1.48206e-07	0.00189763
ERV3-1	0.0880804	1.68059e-07	0.00215217		NUTM2B-AS1	0.112833	3.72967e-09	4.77733e-05		RIC8A	0.113329	7.32249e-08	0.000937572
WIPF2	0.0875564	1.38274e-08	0.000177074		NPEPPS	0.112809	6.03952e-07	0.00773603		SMAD2	0.113274	1.73785e-07	0.00222515
ALG13	0.0874331	1.35586e-14	1.73631e-10		OSER1	0.112798	1.99026e-09	2.54932e-05		INO80E	0.11311	1.18109e-08	0.000151227
RPPH1	0.0874134	5.40514e-31	6.92182e-27		FAM118A	0.112763	1.762e-14	2.25694e-10		WIPF2	0.113046	5.39482e-09	6.90753e-05
PANK3	0.0873445	1.10591e-07	0.00141623		TLE3	0.112482	8.73715e-12	1.11914e-07		TMEM41B	0.112761	1.93606e-09	2.47893e-05
ZEB2	0.0872956	5.81183e-10	7.44263e-06		GOT2	0.112444	1.14078e-08	0.000146122		NUMB	0.112709	9.58862e-08	0.00122773
LRRC37B	0.0870189	1.94411e-07	0.00248962		MID1IP1	0.112182	2.95833e-11	3.78933e-07		AARS	0.112638	1.07794e-10	1.38019e-06
NFAT5	0.0870167	1.34357e-08	0.000172058		UTP18	0.111948	1.36122e-07	0.00174359		SESN2	0.112531	2.63461e-17	3.37336e-13
NT5M	0.0868322	1.66864e-09	2.13687e-05		TOB2	0.111837	6.18798e-09	7.92618e-05		FNBP1	0.112314	6.88161e-08	0.000881122
FAM72C	0.0865266	1.22537e-15	1.5692e-11		SYT4	0.111835	1.57655e-12	2.0194e-08		MPZL1	0.112241	1.45305e-07	0.00186048
ESR2	0.0865017	2.33838e-22	2.99453e-18		NAA25	0.111769	6.72269e-11	8.61109e-07		POU3F3	0.112181	2.78862e-11	3.57055e-07
AMER2	0.0860302	6.4552e-16	8.26653e-12		CDT1	0.11175	3.87162e-10	4.95916e-06		MEX3B	0.112158	8.53591e-09	0.000109294
SPOCK1	0.0859985	3.38947e-19	4.34056e-15		TRAP1	0.111602	3.79784e-07	0.00486465		HNRNPA1	0.112146	1.46133e-07	0.00187109
ICA1L	0.0859809	2.06777e-09	2.64799e-05		FNIP2	0.111584	1.07268e-10	1.374e-06		HINT2	0.112134	7.32624e-07	0.00938052
ZNF559	0.0859134	3.27759e-12	4.19728e-08		SPINK5	0.111555	1.91166e-07	0.00244865		TOPORS	0.112115	6.00459e-08	0.000768828
FIGN	0.08591	3.67468e-14	4.7058e-10		MCM3	0.111484	4.83043e-08	0.00061873		HSPA1B	0.111999	4.34907e-15	5.56855e-11
TTYH3	0.0858778	1.43659e-07	0.00183969		PEF1	0.111335	3.19971e-09	4.09851e-05		EPHB1	0.11186	8.12943e-10	1.04089e-05
MGAT4C	0.0856593	4.19438e-19	5.37132e-15		2007-03-01	0.111275	3.49309e-08	0.00044743		CHPF	0.11172	2.52799e-14	3.23684e-10
RP13-942N8.1	0.0854773	2.87668e-11	3.68387e-07		LASP1	0.111239	1.66906e-11	2.1379e-07		RAB40C	0.111695	2.32066e-12	2.97137e-08
LBH	0.0854436	1.50784e-09	1.93093e-05		DNM1L	0.111139	4.57366e-07	0.0058584		CTDNEP1	0.111509	4.86149e-07	0.00622465
PHF1	0.0850554	2.11266e-07	0.00270547		C9orf72	0.111064	1.09678e-13	1.40486e-09		OAT	0.111382	3.48401e-10	4.46093e-06
SLC2A3	0.0849662	4.38711e-10	5.61813e-06		AGO3	0.11104	2.97674e-07	0.00381291		ATP13A2	0.111357	4.21131e-07	0.00539216
MICU3	0.0849039	4.59036e-10	5.87841e-06		ZNF574	0.110847	7.93684e-18	1.01663e-13		ADRA2A	0.110817	4.19506e-19	5.37135e-15
CD200	0.0848994	3.34776e-10	4.28714e-06		SRGAP2B	0.110791	5.91792e-12	7.58026e-08		SPATA33	0.110666	3.94336e-08	0.000504908
GSTM4	0.084808	2.70671e-12	3.46621e-08		SCAMP4	0.110464	5.3477e-12	6.84987e-08		TRIB2	0.11065	2.08377e-13	2.66806e-09
FBXL3	0.0847925	3.02144e-10	3.86925e-06		SLC25A29	0.110305	2.5327e-08	0.000324414		RRAS2	0.110591	9.78276e-10	1.25258e-05
GOLGA6L10	0.0845769	5.54938e-17	7.10653e-13		BCL7B	0.110075	1.51412e-09	1.93944e-05		ACTR3B	0.110501	5.94793e-09	7.61572e-05
MAPT	0.0845437	7.10394e-12	9.09731e-08		TMEM47	0.110035	2.22778e-13	2.85356e-09		SNCAIP	0.110497	1.0228e-12	1.3096e-08
CASC4	0.0844422	1.79158e-07	0.0022943		MT-ND4L	0.110012	7.20649e-08	0.000923079		DDR1	0.110307	4.04683e-07	0.00518156
NUMB	0.0841848	1.36469e-09	1.74762e-05		IAH1	0.109808	1.24921e-07	0.00160011		DPH7	0.110281	2.32088e-11	2.97165e-07
NR2F2-AS1	0.084065	3.75366e-15	4.80694e-11		IST1	0.109746	5.99625e-09	7.6806e-05		PFKL	0.110055	2.40084e-07	0.00307404
CHRDL1	0.0840494	1.76024e-08	0.000225417		ZNF420	0.109666	4.98133e-15	6.38059e-11		ERO1B	0.110004	1.36325e-16	1.7455e-12
AP1M1	0.0839978	2.81165e-07	0.0036006		INTU	0.109552	8.80621e-08	0.00112799		EPCAM	0.109937	3.36039e-24	4.30264e-20
VANGL2	0.0839479	2.30269e-08	0.000294883		EMP2	0.109459	1.7206e-15	2.20392e-11		MRPS30	0.109877	4.58065e-07	0.00586507
DDHD1	0.0838989	1.55392e-07	0.00198996		ARID2	0.109455	5.57972e-09	7.14707e-05		TRAPPC6A	0.109704	3.75432e-10	4.80704e-06
SCPEP1	0.0835951	4.48789e-11	5.74719e-07		ZNF714	0.109239	6.22195e-08	0.000796969		ATF3	0.1096	1.08507e-25	1.38933e-21
CXXC4	0.0835051	6.42278e-19	8.22502e-15		IP6K1	0.109147	1.66132e-10	2.12798e-06		TNPO2	0.109429	1.32057e-10	1.69086e-06
CDK11A	0.0832286	1.18487e-08	0.000151734		DKK3	0.109022	2.26193e-07	0.00289731		ABHD17B	0.109278	1.96596e-09	2.51722e-05
IQSEC1	0.0831917	1.57554e-08	0.000201763		GSK3A	0.109014	8.35719e-14	1.07047e-09		CLSTN3	0.109212	4.73599e-13	6.06396e-09
FUCA2	0.0831744	9.79324e-12	1.25412e-07		ADAMTS9	0.109001	4.47074e-21	5.72657e-17		NUDCD3	0.109177	3.52685e-09	4.51578e-05
ZNF92	0.0829811	8.07141e-08	0.00103363		NMT1	0.108922	2.54496e-11	3.25984e-07		RPRM	0.109144	2.13709e-12	2.73632e-08
SLC35A1	0.0829071	6.70338e-11	8.58434e-07		FOXO3	0.108854	9.30436e-08	0.00119179		CCDC59	0.108941	7.21871e-07	0.00924283
LHFP	0.0828793	1.27465e-13	1.63232e-09		ELF2	0.108755	8.71968e-09	0.00011169		C10orf10	0.108821	1.81582e-13	2.32497e-09
LPL	0.0827017	6.43088e-18	8.23538e-14		KMT5C	0.10838	7.69838e-10	9.86086e-06		SRD5A1	0.108787	2.01592e-08	0.000258119
ZNF622	0.0825463	2.01669e-08	0.000258257		GJC1	0.108354	9.58954e-14	1.22832e-09		SLC37A3	0.108664	3.32864e-11	4.262e-07
PTH2R	0.0824292	4.34633e-26	5.56592e-22		KCMF1	0.108042	4.9053e-08	0.00062832		OVOS2	0.108639	1.89938e-27	2.43196e-23
ZNF263	0.0824037	1.09832e-09	1.40651e-05		ZNF618	0.107681	8.21081e-10	1.05172e-05		RAB9B	0.108599	8.21058e-11	1.05128e-06
KCNK10	0.0820953	9.46306e-13	1.21184e-08		IRF2BP1	0.107626	3.64794e-17	4.67265e-13		ACSS2	0.108479	7.63476e-17	9.77554e-13
STX5	0.0820174	7.13162e-07	0.00913275		P3H1	0.107609	4.83431e-13	6.19227e-09		RP11-352M15.2	0.108345	9.68343e-08	0.00123987
RP11-544A12.8	0.0818905	3.89975e-09	4.99402e-05		ABL2	0.107576	9.45871e-11	1.21157e-06		ELMSAN1	0.108141	2.58511e-13	3.30998e-09
IP6K1	0.0817811	3.20546e-08	0.000410491		LPCAT4	0.107533	1.13758e-17	1.45712e-13		ANKMY2	0.108101	6.622e-09	8.4788e-05
SALL2	0.0810986	2.66338e-09	3.41072e-05		ZNF639	0.107501	2.19305e-08	0.000280907		C11orf87	0.108082	3.33e-18	4.26373e-14
CHERP	0.0809804	1.25925e-07	0.0016126		CIAPIN1	0.107461	4.82254e-07	0.00617719		EEF1A1	0.107794	9.89943e-16	1.26752e-11
DCLK2	0.0809789	8.10215e-11	1.03756e-06		USP34	0.10739	1.97016e-07	0.00252358		STRIP1	0.107671	6.11998e-08	0.000783602
NDUFA7	0.0807618	4.26787e-09	5.46544e-05		CSPP1	0.107218	3.59699e-10	4.60739e-06		DEXI	0.107532	1.04091e-07	0.00133279
AGPAT4	0.0806654	3.36508e-07	0.00430932		DYM	0.10721	9.39681e-11	1.20364e-06		RBM42	0.107421	2.72682e-07	0.00349141
LPAR4	0.0806078	3.32014e-13	4.25177e-09		KPNA6	0.107146	4.20797e-08	0.000538999		NCDN	0.107409	5.079e-12	6.50315e-08
AC010287.1	0.0803349	1.86953e-20	2.39412e-16		MEGF9	0.106938	1.97908e-13	2.535e-09		EID2	0.107157	5.23401e-09	6.70162e-05
MIR181A2HG	0.0803345	8.97822e-14	1.14975e-09		RASA4	0.106894	3.57992e-11	4.58552e-07		SCAMP4	0.107045	6.8557e-09	8.77804e-05
SLC16A2	0.0803293	1.46605e-10	1.87743e-06		ZNF90	0.106857	2.0376e-11	2.60996e-07		IRF2BP1	0.106911	1.13832e-11	1.45751e-07
AC004556.1	0.0802892	2.50236e-42	3.20452e-38		ATAD2	0.106838	1.06803e-09	1.36803e-05		ADGRB3	0.106893	9.82847e-10	1.25844e-05
MFSD11	0.080106	4.29581e-09	5.50121e-05		DYRK2	0.106701	2.27699e-10	2.91659e-06		BCL7B	0.106369	6.7199e-09	8.60417e-05
PRKCA	0.0799644	1.35253e-08	0.000173205		JMJD6	0.106677	7.49753e-14	9.60358e-10		PCDHGB6	0.106312	3.8171e-12	4.88742e-08
DEDD2	0.0799059	1.27485e-09	1.63258e-05		PPM1D	0.106461	2.27828e-12	2.91825e-08		LRRTM2	0.10606	1.82035e-10	2.33077e-06
PIM1	0.07985	2.55854e-07	0.00327646		ARHGEF26	0.106406	2.39463e-12	3.06728e-08		PRKAB1	0.105966	1.08392e-14	1.38785e-10
DNAJC3	0.0797809	4.61388e-08	0.000590853		AP1M1	0.106357	1.34554e-08	0.00017235		ST8SIA2	0.105953	7.61793e-09	9.754e-05
BCAS4	0.0797405	1.77552e-09	2.27373e-05		SMAD2	0.106325	4.28547e-08	0.000548926		RAB3B	0.105931	1.37252e-13	1.75738e-09
GAN	0.0796371	1.65735e-07	0.0021224		C3orf58	0.106027	7.14885e-19	9.15696e-15		GAL3ST4	0.105686	6.78115e-18	8.68258e-14
PRKAB1	0.0794813	1.69396e-10	2.16928e-06		AAAS	0.106019	1.16989e-10	1.49851e-06		PLS3	0.105414	2.04971e-17	2.62445e-13
GCFC2	0.0794399	4.30931e-14	5.5185e-10		CPSF4	0.105935	1.91662e-11	2.45499e-07		KCTD5	0.10517	9.00688e-11	1.15324e-06
PCDHB2	0.0793473	7.99757e-10	1.02417e-05		EXOG	0.105722	1.12523e-09	1.44131e-05		NAA25	0.105024	1.57063e-08	0.000201104
ANG	0.079295	2.02299e-14	2.59064e-10		ADGRV1	0.105691	2.94102e-25	3.76715e-21		NPRL2	0.104938	2.18117e-09	2.79277e-05
ANK3	0.0792188	6.20053e-10	7.9404e-06		NXT1	0.105681	2.91659e-09	3.73585e-05		LRRC37B	0.104838	1.73562e-11	2.22228e-07
P3H1	0.0791375	1.84864e-11	2.36737e-07		UXS1	0.105341	8.20466e-10	1.05093e-05		SNAP47	0.104818	3.50384e-07	0.00448631
MEIS3	0.0791258	1.51333e-07	0.00193797		GPC4	0.10518	4.61017e-10	5.90516e-06		MGST1	0.104773	2.42474e-15	3.10464e-11
PDE7A	0.0790129	3.70006e-08	0.000473829		WIPF2	0.105134	1.0166e-10	1.30217e-06		CHST8	0.104754	4.36251e-09	5.58576e-05
SLC25A25	0.0789115	4.86822e-12	6.23425e-08		EPS8	0.105026	1.28097e-20	1.64079e-16		PNMAL1	0.104673	7.46684e-08	0.000956055
GAS7	0.078891	1.52747e-10	1.95607e-06		CENPN	0.104984	3.72118e-11	4.76646e-07		FSIP2	0.104524	3.71433e-27	4.75583e-23
KCNIP2	0.078681	3.27334e-17	4.19184e-13		TSC22D2	0.10495	1.49362e-14	1.91318e-10		CDK11A	0.104289	1.8725e-10	2.39755e-06
CADM2	0.0785839	3.75147e-15	4.80413e-11		SLIT1	0.104894	4.54288e-11	5.81898e-07		DLGAP1	0.103916	5.67997e-08	0.000727263
SLC16A3	0.078463	9.25521e-14	1.18522e-09		DLST	0.104889	1.0637e-12	1.3625e-08		KLHDC8A	0.103854	3.0498e-15	3.90496e-11
EPHA3	0.0783793	7.56561e-14	9.68852e-10		CKAP2	0.104806	7.79e-08	0.000997821		DCLK2	0.103725	3.64853e-12	4.67157e-08
LEMD2	0.077943	1.69399e-07	0.00216933		RRAGC	0.104652	7.48915e-09	9.59285e-05		C2CD2L	0.103358	7.68617e-14	9.84137e-10
PCDH17	0.0778848	2.37381e-15	3.0399e-11		GPRC5B	0.104644	6.34655e-10	8.1293e-06		GTPBP3	0.103354	1.46699e-11	1.87833e-07
COQ10B	0.0777513	6.79361e-13	8.6999e-09		EIF4G3	0.104532	5.82927e-08	0.000746671		YBEY	0.103343	3.18901e-11	4.0832e-07
TOX2	0.0777472	5.8629e-15	7.50803e-11		CCDC88C	0.10447	5.24127e-08	0.000671355		FABP3	0.103282	3.24371e-24	4.15325e-20
RP11-499F3.2	0.0776605	4.17865e-19	5.35118e-15		ACSL4	0.104389	1.22053e-19	1.56338e-15		CHST10	0.103093	5.05147e-09	6.46791e-05
POMGNT1	0.0776412	3.46436e-07	0.00443646		CDKN2AIP	0.10438	7.71498e-10	9.88212e-06		NMT1	0.103026	2.89722e-10	3.7096e-06
CTPS2	0.0774914	7.54048e-13	9.65634e-09		LIMCH1	0.104379	1.27453e-11	1.63255e-07		CCDC144NL-AS1	0.102529	2.12443e-08	0.000272011
NPRL2	0.077434	6.33808e-08	0.000811654		CASC15	0.104165	9.00653e-08	0.00115365		TOMM40L	0.102444	6.64744e-14	8.51138e-10
TUBA1C	0.0772826	9.92153e-11	1.27055e-06		BORCS7	0.104096	4.35627e-09	5.57995e-05		LRRN1	0.102358	4.35991e-13	5.58243e-09
OTUD1	0.0771775	1.08304e-12	1.38694e-08		UBL3	0.104079	1.92267e-09	2.46275e-05		IGSF8	0.102301	5.35544e-08	0.00068571
TFE3	0.0771229	1.385e-17	1.77363e-13		NUFIP2	0.10404	1.39547e-08	0.000178746		PRKAG1	0.102249	1.71583e-07	0.00219695
SLITRK2	0.0770774	1.49834e-16	1.91878e-12		CHPT1	0.104027	1.2671e-09	1.62302e-05		SIAH3	0.102228	1.9088e-16	2.44402e-12
RNASEK	0.0770651	6.05075e-14	7.74859e-10		RRM2	0.103694	6.72462e-09	8.61357e-05		NSUN6	0.102129	6.64327e-10	8.50605e-06
SLC1A6	0.0770445	7.63999e-11	9.78377e-07		EHBP1	0.103633	2.31981e-07	0.00297145		MGRN1	0.102058	1.07824e-07	0.00138058
LRRN3	0.0769572	7.55656e-26	9.67693e-22		NFAT5	0.103599	2.62613e-12	3.3638e-08		PDXDC1	0.101833	6.07678e-09	7.78071e-05
GUSB	0.0767838	2.48887e-07	0.00318725		FMNL2	0.103277	1.09417e-07	0.00140152		PI4KB	0.10169	8.20722e-12	1.05085e-07
EPHA7	0.0765553	1.96454e-13	2.51579e-09		BMS1	0.103265	2.07197e-08	0.000265399		MBOAT7	0.10151	3.33794e-09	4.2739e-05
HGSNAT	0.0765397	2.61887e-07	0.00335372		DUSP12	0.103207	4.82655e-09	6.18233e-05		RP11-332H14.2	0.101296	9.08095e-12	1.16272e-07
RAB1B	0.0764848	2.57623e-09	3.29911e-05		QSOX1	0.103106	7.51231e-11	9.62252e-07		NDRG4	0.101292	6.99939e-08	0.000896202
DUOX1	0.0763739	4.39707e-08	0.000563088		GALNT14	0.10262	2.04851e-18	2.62393e-14		HCN3	0.100996	9.5098e-15	1.21763e-10
MFSD2A	0.0761061	4.31278e-12	5.52294e-08		NR2F2-AS1	0.10255	6.88183e-24	8.81493e-20		RIIAD1	0.10082	3.1685e-11	4.05694e-07
KANSL1-AS1	0.0758044	7.48161e-17	9.58095e-13		DNAJC9	0.102512	2.88252e-08	0.000369222		ZFX	0.100558	2.67644e-14	3.42692e-10
DAG1	0.0757834	4.16444e-08	0.000533298		PSPC1	0.102457	7.03428e-07	0.00901021		TARBP1	0.100556	6.99328e-09	8.95419e-05
DENND5A	0.0757436	2.39099e-08	0.000306191		WHSC1	0.102344	3.19425e-07	0.00409151		CYTH1	0.10039	1.03666e-09	1.32734e-05
RP11-798M19.6	0.0757423	1.00593e-07	0.00128819		BNIP2	0.102316	9.24126e-10	1.18371e-05		POLDIP3	0.100128	2.18588e-08	0.00027988
BTN2A1	0.0757132	5.4679e-11	7.00219e-07		KHSRP	0.102272	1.25574e-08	0.000160848		PRPF8	0.10009	4.38126e-07	0.00560977
ZNF568	0.0756921	2.54179e-22	3.25502e-18		LINC00511	0.10217	9.35531e-17	1.19832e-12		MFSD11	0.100013	3.76196e-08	0.000481681
CYFIP1	0.0754133	1.297e-08	0.000166094		CAT	0.102095	2.92413e-41	3.74551e-37		ZNF274	0.0999111	3.57112e-07	0.00457247
PITPNC1	0.0753423	9.40849e-13	1.20485e-08		EP400	0.102094	1.12741e-09	1.4441e-05		NBEAL1	0.0997618	7.39145e-07	0.00946402
SNHG12	0.0752116	5.28639e-09	6.76975e-05		PRPF8	0.102037	3.344e-08	0.000428333		CA5B	0.0997278	1.16416e-19	1.4906e-15
LONRF2	0.0750683	9.99468e-13	1.27992e-08		LIX1L	0.102001	3.6282e-09	4.64737e-05		MXD1	0.0994774	1.66221e-21	2.12829e-17
ARHGEF10	0.0749961	3.73626e-08	0.000478465		ZBTB44	0.101766	6.4638e-09	8.27949e-05		TSPAN2	0.0993996	1.49114e-11	1.90925e-07
STK26	0.0749141	7.01264e-09	8.98038e-05		RASA1	0.101467	3.13654e-14	4.0176e-10		PTPRN2	0.0993978	1.89135e-13	2.42168e-09
STK32C	0.0748469	5.81135e-08	0.000744201		SMIM13	0.101369	3.6346e-19	4.65556e-15		RAD9A	0.09918	7.73222e-13	9.90033e-09
GFM1	0.0746928	2.43751e-08	0.000312148		ATRNL1	0.101364	9.09881e-18	1.16547e-13		AKAP7	0.0991676	4.73404e-20	6.06147e-16
LMBR1L	0.074498	6.62427e-07	0.00848304		GLUD1	0.101329	1.07475e-07	0.00137665		NEBL	0.0991391	1.19226e-20	1.52657e-16
SGIP1	0.0744898	8.52382e-12	1.09156e-07		OTX1	0.101281	1.10322e-18	1.41311e-14		FAHD2A	0.099021	5.58741e-08	0.000715413
MAGEL2	0.0741933	9.99257e-17	1.27965e-12		AACS	0.101257	1.25167e-10	1.60327e-06		RXRB	0.0990096	6.33389e-09	8.10991e-05
LRP8	0.0741348	1.90904e-13	2.44472e-09		INO80	0.101102	1.71484e-12	2.19654e-08		TTC33	0.0989721	4.26842e-12	5.46529e-08
MLC1	0.0734279	9.17534e-12	1.17499e-07		FSIP2	0.101026	2.76331e-26	3.53952e-22		IGSF1	0.0989575	2.00627e-36	2.56883e-32
TRAPPC2P1	0.073143	1.21077e-07	0.00155052		FBXO33	0.100885	1.84068e-13	2.35772e-09		NUAK1	0.0989529	2.35792e-08	0.000301908
PTPRE	0.0730576	1.39672e-09	1.78864e-05		ATP2A2	0.100628	1.2862e-09	1.64749e-05		RPLP2	0.0989252	7.26145e-08	0.000929756
C10orf35	0.073048	1.43843e-08	0.000184205		BTBD7	0.100568	1.07382e-09	1.37545e-05		ZNF263	0.0988768	2.14129e-12	2.74171e-08
HPCAL1	0.0729588	7.85988e-08	0.00100654		WDR43	0.100518	1.31214e-08	0.000168072		ORC6	0.0986684	7.11642e-16	9.11186e-12
ZNF558	0.0729559	1.48581e-34	1.90273e-30		POU3F2	0.1005	8.77665e-09	0.00011242		LASP1	0.0986196	2.96783e-07	0.00380001
MGARP	0.0729225	3.8475e-17	4.92711e-13		PRRC2A	0.100385	6.58138e-08	0.000843008		POU3F1	0.0984446	3.09082e-11	3.95749e-07
VEGFA	0.0728855	2.3776e-08	0.000304475		S1PR1	0.100273	8.35482e-20	1.07017e-15		RABGGTB	0.0984019	9.62177e-09	0.000123197
TMUB2	0.0726723	7.79682e-07	0.0099846		RCC1	0.100014	2.54076e-14	3.25446e-10		GEMIN8	0.0983365	4.19667e-16	5.37342e-12
CARD8	0.0725977	7.76282e-09	9.94106e-05		IARS2	0.0999413	3.68936e-09	4.7257e-05		CSRNP1	0.0982981	8.13169e-15	1.04118e-10
PEX6	0.072465	1.41826e-10	1.81623e-06		ERC1	0.0998902	5.69306e-09	7.29224e-05		NCOA7	0.0979503	1.09375e-09	1.40044e-05
NBPF19	0.0722206	1.5172e-07	0.00194293		DLG1	0.099874	1.73948e-09	2.2281e-05		CREBZF	0.0978514	1.24029e-09	1.58807e-05
RC3H1	0.0721673	1.37894e-09	1.76587e-05		PTCD3	0.0996555	6.42104e-08	0.000822471		MRPL49	0.0977414	5.59241e-09	7.16052e-05
ACOT9	0.0721515	1.6146e-12	2.06766e-08		C10orf35	0.099626	1.03621e-07	0.00132729		CHERP	0.0975135	1.77074e-08	0.000226726
PIM2	0.0721019	2.35649e-17	3.01772e-13		MNAT1	0.0994715	1.35861e-07	0.00174025		AATF	0.0973777	5.68576e-08	0.000728004
CHPF	0.0719171	3.54978e-07	0.00454585		CRNDE	0.0994222	3.63659e-09	4.65811e-05		PIK3IP1	0.0972768	7.69422e-12	9.85167e-08
PIK3C2B	0.0714094	9.62958e-13	1.23316e-08		CENPE	0.0994207	2.56407e-09	3.28431e-05		CCDC94	0.0972302	1.04584e-11	1.33909e-07
ATXN7	0.0713792	1.4255e-07	0.00182549		USP7	0.0993712	5.582e-11	7.14998e-07		RUNDC1	0.0969204	1.58562e-08	0.000203022
GUCD1	0.0713588	2.02234e-08	0.00025898		CLSPN	0.0993578	2.71872e-09	3.48241e-05		STARD4	0.0968628	1.22958e-09	1.57436e-05
GNAL	0.0712304	7.7561e-16	9.93246e-12		FLRT3	0.0993203	4.64494e-07	0.0059497		IKZF4	0.096818	5.10474e-14	6.53611e-10
GALK1	0.0711442	2.54278e-07	0.00325629		NRXN2	0.0990289	7.95197e-08	0.00101857		PHKB	0.0968105	4.34574e-07	0.00556429
TMEM39A	0.0711236	5.38768e-11	6.89946e-07		TLK1	0.0990154	5.54381e-08	0.000710107		ACVR1B	0.0968042	5.10737e-08	0.000653948
RND1	0.0706942	2.62284e-15	3.35881e-11		ANKLE2	0.0988437	7.0797e-10	9.06839e-06		ADAT1	0.0966151	4.86857e-12	6.23372e-08
NECAP1	0.0706136	1.6573e-07	0.00212234		SCRG1	0.0987948	1.12405e-15	1.4398e-11		DACT3	0.0964469	5.55366e-10	7.1109e-06
FAM199X	0.0704914	2.29561e-10	2.93976e-06		PLPP3	0.0987341	1.14473e-10	1.46629e-06		STARD3	0.0961356	9.25958e-08	0.0011856
RABGAP1L	0.0703996	7.10949e-15	9.10441e-11		ICA1L	0.0983706	1.24861e-11	1.59935e-07		PRPF4	0.0959014	6.22236e-09	7.96712e-05
RP11-410L14.2	0.0703519	2.12169e-09	2.71703e-05		ABHD3	0.0982596	1.89334e-14	2.42518e-10		PRKRIP1	0.0958429	1.21166e-07	0.00155141
RCCD1	0.0698857	6.13004e-08	0.000785013		FAT4	0.0981936	8.4275e-14	1.07948e-09		NAA16	0.095825	1.19628e-10	1.53172e-06
SMG9	0.0696135	3.09557e-07	0.00396419		CEP350	0.0981422	1.31964e-07	0.00169032		MIEF2	0.0957995	2.46949e-11	3.16194e-07
CASC9	0.0695484	4.70736e-33	6.02824e-29		ZNF721	0.0981386	6.49816e-11	8.32349e-07		EFTUD2	0.0956629	7.61965e-09	9.7562e-05
MYL5	0.0695052	1.12439e-18	1.43989e-14		HDAC3	0.0981242	6.64693e-07	0.00851405		RAPGEF6	0.0955299	3.80088e-14	4.86665e-10
KCNIP1	0.0694729	3.05018e-18	3.90606e-14		RP3-395M20.12	0.0980585	4.21625e-15	5.40059e-11		CLVS1	0.0954762	1.69743e-10	2.17339e-06
OSBPL10	0.0688597	6.88822e-18	8.82105e-14		GIPC1	0.0980407	6.34691e-07	0.00812976		WIPI1	0.0954758	7.09145e-17	9.07989e-13
ZNF74	0.0688279	6.3905e-08	0.000818368		PDXDC1	0.0979392	2.93363e-12	3.75769e-08		PYCR1	0.0954603	1.11069e-07	0.00142213
GK	0.0688029	1.42393e-11	1.82348e-07		CTDNEP1	0.0979253	1.19994e-07	0.001537		RCBTB2	0.0953936	3.14723e-10	4.02972e-06
PXN-AS1	0.0685712	2.44667e-08	0.00031332		HMGN5	0.0978671	5.09549e-07	0.00652681		CA11	0.0952626	7.8234e-08	0.00100171
KMT5C	0.0684479	3.23062e-07	0.00413713		ATP11C	0.0977007	8.17809e-12	1.04753e-07		UBLCP1	0.0951018	2.22819e-07	0.00285297
AVIL	0.0682699	9.86493e-12	1.2633e-07		SLC37A3	0.0976723	2.0134e-10	2.57896e-06		B3GAT2	0.0950278	8.34405e-08	0.00106837
NBPF9	0.0682155	1.57926e-16	2.0224e-12		TCF3	0.0973419	5.07072e-07	0.00649508		ATP11C	0.0948757	1.98573e-13	2.54253e-09
PCSK9	0.0681414	1.70148e-18	2.17891e-14		CTSB	0.0971764	4.37789e-08	0.000560764		PPP1R37	0.0947294	6.62215e-09	8.479e-05
PDK3	0.0681192	3.70595e-12	4.74583e-08		UHRF1	0.0971661	5.06014e-10	6.48154e-06		UNG	0.0944688	5.1862e-10	6.64041e-06
PNP	0.0678997	6.16616e-08	0.000789638		SUV39H2	0.0971476	1.24616e-08	0.000159621		NEU1	0.0944566	4.78735e-08	0.000612973
ZBTB16	0.0678653	2.97791e-13	3.81351e-09		SMG1	0.0971333	1.07006e-09	1.37063e-05		PDCD6IP	0.0943928	5.45434e-07	0.00698373
POLG	0.0676336	1.15984e-07	0.0014853		UBE3C	0.0970136	2.97264e-16	3.80765e-12		SLC1A6	0.0942181	2.47701e-07	0.00317156
MOXD1	0.0669577	7.01443e-08	0.000898268		PCDHB9	0.0968831	1.52835e-18	1.95766e-14		ANKRA2	0.0941606	4.67166e-10	5.98159e-06
TNFRSF19	0.0668812	2.00463e-10	2.56712e-06		ZNF566	0.0968642	4.16447e-10	5.33427e-06		SNHG12	0.0940379	1.91201e-12	2.44814e-08
IGSF11	0.0668304	3.74241e-25	4.79253e-21		PDE7A	0.096793	9.58057e-08	0.00122718		OTUD1	0.0936912	3.09978e-15	3.96896e-11
SMIM13	0.0668031	8.46877e-12	1.08451e-07		RBM7	0.0967671	1.07505e-09	1.37703e-05		ZFYVE27	0.0935175	1.39222e-11	1.7826e-07
SLC35A2	0.066353	3.44358e-10	4.40984e-06		RGS12	0.0967329	2.50026e-07	0.00320258		CTSD	0.0931268	8.02505e-08	0.00102753
TBC1D12	0.0662073	1.64313e-08	0.000210419		SNTB2	0.0967059	7.96246e-11	1.01991e-06		P3H1	0.0930767	6.46233e-11	8.27437e-07
TPST1	0.0659129	3.92285e-08	0.000502361		SLC2A6	0.0966069	7.75364e-10	9.93164e-06		LGMN	0.0927312	8.23465e-08	0.00105436
ERCC3	0.0656749	7.96238e-08	0.00101966		MAPRE2	0.0965719	1.65001e-10	2.11349e-06		SMIM13	0.0926829	8.98239e-13	1.1501e-08
AMT	0.0654593	2.1295e-11	2.72703e-07		GPT2	0.0965327	1.38372e-09	1.77241e-05		ZNF16	0.0926825	2.14504e-14	2.74651e-10
PIK3IP1	0.0654427	2.10191e-12	2.69171e-08		TIA1	0.0964997	6.59323e-07	0.00844527		PCGF6	0.092672	3.80064e-12	4.86634e-08
NACA2	0.0654249	8.96895e-11	1.14856e-06		RBM14	0.0964327	9.5495e-10	1.2232e-05		GATAD1	0.0926577	2.69185e-07	0.00344664
ANKRD44	0.0653003	1.02558e-09	1.31335e-05		FAM19A5	0.0963426	9.51178e-42	1.21836e-37		TTC9C	0.0926511	8.01209e-08	0.00102587
NEO1	0.0650743	1.97309e-08	0.000252674		CCM2	0.0960415	4.04961e-10	5.18715e-06		DPP8	0.0919845	1.86223e-08	0.00023844
ACSL4	0.0650183	3.17063e-14	4.06031e-10		SCML1	0.0958735	4.1733e-09	5.34558e-05		EEA1	0.0918545	2.44236e-08	0.00031272
PARP16	0.0649999	3.34409e-09	4.28244e-05		PPM1B	0.0957638	3.0872e-08	0.000395439		CTPS1	0.0916753	3.95142e-11	5.0594e-07
EHD1	0.0649282	3.57107e-08	0.000457312		PTPRN2	0.0956735	1.67312e-25	2.1431e-21		PCDH10	0.0915135	4.20442e-19	5.38334e-15
NRXN3	0.0645301	2.56438e-10	3.28395e-06		UBXN2A	0.095581	2.73507e-09	3.50335e-05		ST7	0.0911945	8.97821e-09	0.000114957
DIP2C	0.0644134	2.36604e-07	0.00302996		WDR1	0.0954623	1.68476e-07	0.002158		RP11-511P7.5	0.091041	1.99478e-09	2.55412e-05
CRB1	0.0641067	2.66491e-07	0.00341268		TOR1AIP2	0.0951713	1.48471e-08	0.000190176		KIAA0930	0.0909788	3.02965e-07	0.00387916
GPR108	0.0638214	2.68417e-07	0.00343735		ING2	0.0950828	6.24356e-08	0.000799737		PISD	0.0909205	7.38329e-10	9.45357e-06
IGSF21	0.0637027	3.77331e-22	4.8321e-18		CDC27	0.0949076	2.73458e-09	3.50272e-05		COG1	0.0909205	5.99321e-09	7.6737e-05
TARBP1	0.0635364	1.85061e-07	0.00236989		SDF2L1	0.0948165	7.64362e-08	0.000979072		XKR4	0.0908284	4.66412e-10	5.97194e-06
MTSS1	0.063478	2.17741e-08	0.000278839		SNRK	0.0947917	8.96937e-13	1.14889e-08		CKMT1A	0.0906623	1.10174e-12	1.41067e-08
PRELID3B	0.0633729	1.27897e-07	0.00163785		MFHAS1	0.0947799	8.70566e-10	1.11511e-05		KIAA0319L	0.0905291	4.17691e-07	0.00534812
ZNF227	0.0630419	2.77604e-07	0.00355499		SGOL1	0.0947492	1.3067e-08	0.000167375		PAQR4	0.0905158	1.26096e-08	0.000161454
HERC4	0.0630133	2.71111e-07	0.00347185		NCOA1	0.0946773	3.42258e-09	4.38398e-05		ELP5	0.0904754	1.17477e-08	0.000150417
INPP1	0.0628321	1.7272e-17	2.21185e-13		CPSF7	0.0944955	3.70883e-09	4.75064e-05		CPSF7	0.090444	8.3364e-09	0.000106739
OSBP	0.0626463	1.42413e-07	0.00182374		FEZF1	0.0944616	4.59122e-20	5.88089e-16		BTG2	0.0903276	1.5738e-09	2.0151e-05
ZNF680	0.0625425	5.89308e-07	0.00754667		PDCD6IP	0.0942975	3.99589e-08	0.000511834		KDSR	0.090216	3.44932e-07	0.0044165
MBNL2	0.0623236	4.34478e-12	5.56392e-08		TUBG1	0.0939624	1.33246e-07	0.00170674		NARFL	0.0899649	9.71682e-12	1.24414e-07
DOLPP1	0.06231	1.08193e-08	0.000138552		GALNT2	0.0936813	1.03338e-11	1.32366e-07		ELMO2	0.0897863	1.23882e-10	1.58618e-06
HBEGF	0.0621817	3.06022e-16	3.91892e-12		MIS18BP1	0.0936484	1.22552e-07	0.00156977		GRPEL1	0.089725	5.25317e-07	0.00672616
SULF2	0.0621652	3.5001e-11	4.48223e-07		NUCB1	0.0936314	8.27435e-08	0.00105986		SH2D3C	0.0896423	5.35686e-09	6.85893e-05
AACS	0.0618823	1.49116e-08	0.000190958		GAPVD1	0.0932255	3.89231e-10	4.98566e-06		CDK20	0.0895735	1.10911e-11	1.4201e-07
C20orf194	0.0617922	2.48333e-07	0.00318015		SMURF2	0.0932236	3.99787e-07	0.00512087		VPS37D	0.0895568	2.1587e-09	2.764e-05
TSPAN2	0.0617825	1.87268e-14	2.39815e-10		AC098973.2	0.092965	8.06239e-33	1.03271e-28		WDR37	0.0894079	9.93132e-14	1.27161e-09
MANBA	0.0615249	5.31186e-10	6.80236e-06		CACNB3	0.0929045	3.7082e-08	0.000474983		QTRT1	0.0893466	7.16889e-07	0.00917905
POLA1	0.06152	5.00057e-08	0.000640373		RUSC1	0.092887	2.91218e-08	0.000373021		ST3GAL6	0.089255	1.49995e-10	1.92054e-06
ATP13A2	0.0613233	1.02674e-07	0.00131485		NRM	0.092703	4.62704e-10	5.92678e-06		DLST	0.0891894	1.98439e-09	2.54081e-05
TOX	0.0613066	9.20481e-11	1.17877e-06		MTSS1	0.0924953	9.41313e-09	0.000120573		UIMC1	0.0891858	9.63004e-10	1.23303e-05
GADD45B	0.061295	2.66502e-11	3.41283e-07		BLVRA	0.092442	3.73917e-07	0.00478951		PSD	0.0890751	3.13346e-08	0.000401208
GSTZ1	0.0611962	1.16597e-10	1.49315e-06		MFAP4	0.0923386	1.06184e-07	0.00136011		LPCAT4	0.088865	7.01544e-09	8.98257e-05
MED26	0.0611148	2.03054e-09	2.60031e-05		GLCE	0.0922754	1.5663e-07	0.00200627		CC2D1A	0.0888365	1.06606e-08	0.000136498
SLC37A3	0.060684	6.33639e-07	0.00811439		ING3	0.0922035	7.90408e-10	1.01243e-05		PLA2G6	0.0881469	3.24638e-17	4.15666e-13
PHC3	0.0606731	2.55697e-10	3.27446e-06		NUDCD3	0.0921279	3.68902e-10	4.72527e-06		RRN3	0.0881035	4.38662e-08	0.000561663
ZNF250	0.0605875	1.13159e-07	0.00144911		ZNF286A	0.0921256	7.96058e-15	1.01967e-10		PHTF2	0.0878604	3.84537e-08	0.000492361
PELI1	0.0599626	4.70305e-08	0.000602273		NIN	0.0919063	1.84147e-12	2.35874e-08		RBM11	0.0878402	6.06333e-12	7.76348e-08
CDH23	0.0599608	4.62654e-08	0.000592475		RNF168	0.0918909	8.01152e-08	0.0010262		GALK2	0.0878302	3.34605e-07	0.00428429
FSIP2	0.059845	5.12033e-17	6.5571e-13		CIAO1	0.091756	2.98656e-08	0.000382548		PDZRN3	0.0877147	4.04167e-25	5.17495e-21
FOSB	0.0598096	2.61732e-17	3.35174e-13		AC004556.1	0.0916393	4.67687e-38	5.9906e-34		NCR3LG1	0.0877066	5.57578e-15	7.13923e-11
GGT7	0.0598089	7.69114e-07	0.00984928		ZNF559	0.0916341	4.37886e-13	5.60888e-09		M6PR	0.0874789	2.27046e-08	0.00029071
FAM73A	0.0597648	7.47551e-08	0.000957313		LITAF	0.09153	1.73358e-11	2.22054e-07		RABGAP1L	0.0872925	4.02589e-09	5.15474e-05
PDE12	0.0592437	2.0785e-11	2.66173e-07		ZNF704	0.0914364	1.48834e-08	0.000190642		NKAIN1	0.0872296	7.22768e-08	0.000925432
PAPD4	0.0592329	8.37491e-08	0.00107249		CDIP1	0.0913764	7.29455e-07	0.00934359		SPHK2	0.0870026	9.1998e-09	0.000117794
TRIT1	0.0589521	2.76065e-07	0.00353529		KDM2B	0.091349	3.59193e-09	4.60091e-05		MGMT	0.0868773	2.79737e-22	3.58175e-18
PIKFYVE	0.0588098	1.42215e-09	1.8212e-05		ZNF414	0.0913263	7.05653e-11	9.03871e-07		FAM65B	0.0868367	1.12441e-08	0.000143969
FAM49A	0.0586706	4.59842e-07	0.00588874		C12orf75	0.0912737	7.24514e-07	0.0092803		ETNK1	0.0866242	3.69315e-07	0.00472871
PLOD1	0.058504	7.85577e-10	1.00601e-05		PRKRIR	0.0912467	4.21909e-08	0.000540423		MIR124-2HG	0.0865721	5.161e-07	0.00660814
SLC29A2	0.0583637	1.00483e-09	1.28678e-05		HKR1	0.0910488	2.74361e-24	3.51429e-20		ADCK2	0.0864488	9.34226e-09	0.000119618
PHF11	0.0582631	4.05165e-21	5.18855e-17		SLC4A8	0.0910409	9.26053e-09	0.000118618		RGS16	0.0864387	3.18376e-07	0.00407649
TOM1L2	0.0581818	6.14278e-10	7.86644e-06		ENTPD6	0.0909786	1.96116e-10	2.51205e-06		PTPN5	0.0863934	8.32172e-16	1.06551e-11
ACACA	0.0581702	4.76601e-08	0.000610336		FBXL3	0.090977	1.45777e-11	1.86726e-07		E2F3	0.0863492	2.76886e-09	3.54525e-05
ZNF512	0.0578697	2.28707e-07	0.00292882		BCAS4	0.0909343	3.11763e-09	3.99337e-05		SIRT7	0.0863149	1.07046e-07	0.00137062
AMFR	0.0576321	5.01885e-07	0.00642713		RNF138	0.0909286	4.83122e-08	0.000618831		RP11-51J9.5	0.086303	3.31016e-11	4.23833e-07
RSPH9	0.0576298	1.06752e-14	1.36706e-10		C1D	0.0909116	2.78773e-07	0.0035708		NKAIN3	0.0860845	2.64801e-07	0.00339052
PDGFRB	0.0575987	1.03876e-08	0.000133024		ARMCX6	0.0908145	3.02956e-08	0.000388057		ARL4A	0.0859122	4.21964e-11	5.40283e-07
FAM19A5	0.057581	1.61721e-30	2.071e-26		PPP2CB	0.0907768	2.27996e-07	0.0029204		RP6-65G23.3	0.0858949	1.30707e-15	1.67357e-11
DEPTOR	0.0575477	1.20404e-21	1.54189e-17		NHLH2	0.0906244	3.83679e-08	0.000491454		SLC16A2	0.0857687	3.49761e-12	4.47834e-08
AK5	0.0573088	1.73575e-18	2.2228e-14		ZNF93	0.0904177	2.9389e-13	3.76444e-09		RAB3C	0.0857588	9.909e-08	0.00126875
RAB4B	0.0571881	1.94668e-09	2.49292e-05		ST3GAL6	0.0902934	3.86132e-13	4.94596e-09		ARHGAP44	0.0857469	5.65601e-10	7.24196e-06
ACOX3	0.057058	3.69982e-07	0.00473799		KIFC1	0.0902663	2.7652e-12	3.54195e-08		FZD7	0.0856986	6.39986e-13	8.19438e-09
KLHL15	0.0568329	2.96463e-16	3.79651e-12		RAB4B	0.0902266	1.16064e-10	1.48666e-06		PDE7A	0.0856325	2.61137e-07	0.0033436
HLA-DMA	0.0567448	2.94356e-26	3.76953e-22		PDS5B	0.090178	2.85036e-07	0.00365103		RSPH9	0.0855037	2.68983e-20	3.44406e-16
MON2	0.0565173	3.08529e-08	0.000395103		NEO1	0.09011	6.2893e-11	8.05596e-07		POU3F2	0.0852724	7.38709e-09	9.45843e-05
CEBPZOS	0.0564956	7.29843e-14	9.34637e-10		LPAR2	0.0901027	1.31802e-10	1.68825e-06		SEC23B	0.0852153	4.05787e-07	0.0051957
CTC-534A2.2	0.0564447	3.26646e-10	4.18303e-06		ATAD5	0.0900829	1.12868e-07	0.00144572		KHSRP	0.0851703	3.37053e-07	0.00431563
MALT1	0.0563829	1.41246e-07	0.00180879		EMSY	0.0900782	2.77124e-10	3.54968e-06		NRIP1	0.0848634	7.73338e-08	0.000990182
VASH2	0.0562491	2.71214e-10	3.47316e-06		WDYHV1	0.0900456	4.24471e-09	5.43704e-05		CCS	0.0847788	6.97539e-07	0.00893129
WIPI1	0.0561325	4.80553e-08	0.000615396		ZNF84	0.0900313	4.07854e-07	0.0052242		ARRDC4	0.0847733	5.74048e-11	7.35011e-07
ANXA2	0.0560509	2.0539e-11	2.63023e-07		MAP4K5	0.0900152	2.97712e-07	0.0038134		LIG1	0.0846745	2.10589e-15	2.69638e-11
SNRK	0.055907	5.62904e-07	0.00720855		CTBP1	0.0899344	5.46288e-07	0.0069974		PUDP	0.084664	1.22167e-10	1.56422e-06
NR3C1	0.0558913	2.09746e-07	0.00268601		PCDH11X	0.0898418	8.6374e-14	1.10636e-09		PLA2G15	0.0844465	2.777e-14	3.55567e-10
MAFB	0.0558616	1.77804e-15	2.27695e-11		DCLK2	0.0897966	5.29643e-12	6.7842e-08		PICK1	0.0843899	9.36923e-11	1.19964e-06
HDAC4	0.0558103	5.57154e-10	7.13491e-06		SGSM3	0.0896969	3.22719e-08	0.000413371		MKRN2	0.084353	1.16376e-07	0.00149008
ZDBF2	0.0554148	6.49322e-07	0.00831522		SPC25	0.0896014	4.43534e-10	5.68122e-06		TTYH3	0.0841184	5.04754e-10	6.46287e-06
ERO1B	0.0553318	2.27823e-11	2.9175e-07		ARHGEF7	0.0894033	3.20116e-07	0.00410036		PAPD4	0.0840576	2.37195e-12	3.03705e-08
CNKSR3	0.0552998	2.67378e-10	3.42405e-06		EMC8	0.0893882	2.02199e-07	0.00258997		HSPA13	0.084045	4.19478e-07	0.005371
ELN	0.055022	1.05528e-16	1.35139e-12		KIAA0319L	0.0893587	3.25235e-09	4.16594e-05		SGIP1	0.0840363	4.70783e-07	0.0060279
MXD1	0.0546307	8.02461e-14	1.02763e-09		AC013461.1	0.0892437	8.72479e-10	1.11756e-05		JAZF1	0.0836791	1.86749e-08	0.000239113
DNAJC12	0.0545684	1.50246e-08	0.000192404		PPP2R3A	0.0892224	1.17393e-08	0.000150369		ZBTB20	0.0833073	3.34559e-09	4.2837e-05
NEGR1	0.0545684	6.21238e-09	7.95558e-05		ESR2	0.089108	3.05021e-22	3.90702e-18		EXT2	0.0829667	2.31836e-08	0.000296843
ZNF785	0.0545019	1.80753e-07	0.00231472		PCGF6	0.0890482	1.45597e-11	1.86495e-07		MCM7	0.0828647	3.82137e-07	0.00489288
SLITRK4	0.0544793	1.65968e-09	2.12539e-05		CLVS1	0.0890308	1.03885e-12	1.33066e-08		FN3KRP	0.0828444	1.9034e-09	2.43712e-05
RP11-129M6.1	0.0544692	2.42187e-26	3.10145e-22		MORC3	0.0889238	2.74377e-10	3.5145e-06		RP11-247C2.2	0.0828443	1.8808e-18	2.40818e-14
CTGF	0.0540039	1.69993e-07	0.00217693		XXYLT1	0.0887253	1.62959e-09	2.08734e-05		FEZF1-AS1	0.0828119	8.89223e-22	1.13856e-17
MEX3C	0.0537267	5.17058e-07	0.00662145		SHPRH	0.0887204	3.56825e-07	0.00457057		ABHD10	0.082766	4.51348e-10	5.77906e-06
ELMO2	0.053567	6.12154e-07	0.00783924		FBXO17	0.0886583	9.23047e-10	1.18233e-05		KAT5	0.0826153	7.78289e-07	0.00996522
DTNA	0.0534694	5.49047e-08	0.00070311		STARD4	0.0886081	1.27232e-10	1.62972e-06		ZYX	0.0824861	2.81659e-08	0.000360636
ZNF574	0.0533682	7.67358e-08	0.000982679		PARD3B	0.0885336	3.68123e-08	0.000471529		NAMPT	0.0824803	4.47263e-08	0.000572676
CROCC	0.0533288	4.54944e-13	5.82601e-09		ARX	0.0884981	3.59916e-11	4.61016e-07		ALAD	0.082438	1.25899e-10	1.61201e-06
RNF180	0.0533016	4.39907e-09	5.63345e-05		SMCR5	0.0884813	1.33341e-10	1.70796e-06		PRPF40B	0.0823641	5.61066e-07	0.00718388
RAMP1	0.0532263	4.86344e-07	0.00622813		GATAD2B	0.0884546	1.06504e-07	0.00136422		TRIB1	0.0822804	2.22502e-13	2.84891e-09
PNPLA4	0.0529909	8.35583e-12	1.07005e-07		MBIP	0.088426	4.1371e-07	0.00529921		WDFY2	0.0820183	1.65654e-09	2.12103e-05
STK17B	0.0529342	5.37436e-07	0.0068824		CAMSAP1	0.0883084	3.42487e-09	4.38692e-05		TSTD2	0.0817342	1.00197e-08	0.000128292
SHTN1	0.0529054	1.51291e-08	0.000193743		ZNF703	0.0883061	1.09687e-11	1.40499e-07		NTRK2	0.0813944	1.14932e-22	1.47158e-18
C2orf40	0.0527578	1.7879e-15	2.28958e-11		NAA16	0.0882761	4.98252e-08	0.000638211		ARID1B	0.0811915	5.20742e-07	0.00666757
GPR19	0.0526522	1.01498e-09	1.29979e-05		LRRC37B	0.0882662	1.10746e-10	1.41855e-06		TSC2	0.0809606	5.32754e-09	6.82138e-05
PPM1L	0.0524579	2.6587e-07	0.00340473		LEMD2	0.0881108	1.14137e-09	1.46198e-05		IGFBP4	0.0807976	1.08032e-15	1.38324e-11
NEBL	0.0523872	2.19416e-15	2.80985e-11		OTUD1	0.0880179	1.67631e-14	2.14718e-10		ZNF420	0.0807549	1.28697e-08	0.000164784
RP5-1042K10.10	0.0522196	7.54765e-08	0.000966552		ZC3H12C	0.0878248	3.46755e-14	4.44159e-10		SURF6	0.080735	6.14974e-07	0.00787413
ANKRD18B	0.0521327	3.84322e-09	4.92163e-05		DIP2C	0.0877133	2.06647e-08	0.000264695		SNX32	0.0804861	3.01755e-10	3.86366e-06
RAB30	0.0521105	4.36503e-10	5.58985e-06		HEBP1	0.0875793	4.99285e-07	0.00639534		ALG13	0.0804717	2.63222e-11	3.37029e-07
PPP1R3F	0.0520816	3.24574e-11	4.1565e-07		VPS53	0.0875573	5.29867e-10	6.78707e-06		SOWAHC	0.0802304	7.77981e-11	9.96127e-07
EPHB1	0.0517827	3.31391e-13	4.2438e-09		QRICH1	0.0875441	1.61897e-09	2.07373e-05		DAPK3	0.0802165	1.19331e-07	0.00152792
ALKBH3	0.0517821	2.42007e-11	3.09915e-07		NUMB	0.0874293	1.1232e-08	0.000143871		ABHD5	0.0799244	6.79824e-15	8.70446e-11
NXT2	0.0516773	1.12875e-08	0.000144547		JAG1	0.0873702	2.89108e-17	3.70319e-13		SLC6A6	0.0796355	1.05079e-13	1.34543e-09
LRAT	0.0516453	2.79742e-23	3.58238e-19		STRN3	0.0871719	7.80277e-09	9.99457e-05		ZNF565	0.079606	3.57026e-09	4.57136e-05
ABCA3	0.0516124	1.05875e-08	0.000135583		CHEK1	0.0871587	1.73806e-08	0.000222628		AC144652.1	0.07951	1.86361e-14	2.38616e-10
TRIM4	0.0515478	4.90643e-11	6.28318e-07		PGM1	0.0870194	2.19534e-08	0.000281201		GRIK3	0.0794732	2.32489e-12	2.97679e-08
MYC	0.0514989	1.21278e-09	1.55309e-05		MMP17	0.0869761	2.65594e-13	3.402e-09		HSD17B11	0.0794102	1.14429e-08	0.000146515
MGLL	0.0512881	9.3054e-21	1.19165e-16		CDCA5	0.0869094	7.17826e-13	9.19464e-09		CNPY3	0.0793588	4.94548e-07	0.00633219
SGK223	0.05116	8.246e-09	0.000105598		TENM4	0.0868084	1.91395e-07	0.00245158		KMT5C	0.07928	1.68404e-07	0.00215624
SERAC1	0.0511594	5.78403e-08	0.000740703		PGP	0.0865123	4.4846e-07	0.00574432		UAP1	0.079098	5.27043e-07	0.00674825
MTM1	0.0510478	7.03835e-08	0.000901331		RAB5B	0.0864704	5.36305e-09	6.86953e-05		KLF12	0.0790669	1.26378e-07	0.00161814
PLA2G6	0.0504594	1.78952e-11	2.29166e-07		CDC42BPA	0.0864657	1.91435e-08	0.000245209		VASH1	0.0790297	1.75415e-08	0.000224602
FAM133A	0.0503536	6.41551e-17	8.2157e-13		WDR76	0.0864057	4.48093e-13	5.73962e-09		COASY	0.0790101	1.39498e-07	0.00178613
L3HYPDH	0.0502818	3.12842e-13	4.00626e-09		SMNDC1	0.0862539	5.61482e-07	0.00719202		DSTYK	0.0789497	3.00469e-07	0.0038472
ZNF16	0.0502269	7.93382e-08	0.001016		ZNF16	0.0862446	1.25049e-16	1.60175e-12		C16orf58	0.0789309	3.20626e-11	4.1053e-07
RP11-372K14.2	0.0502016	6.16397e-12	7.89358e-08		DGKB	0.0861944	4.16568e-17	5.33582e-13		ANKFY1	0.0788978	1.42908e-07	0.0018298
IGSF1	0.0500786	2.22197e-19	2.84546e-15		TRAK1	0.0861355	1.28673e-07	0.00164817		NEFL	0.0788645	4.45017e-08	0.0005698
ZNF550	0.0500104	5.33188e-09	6.828e-05		TYW3	0.0860902	5.25201e-33	6.7273e-29		GFY	0.078806	1.98621e-17	2.54314e-13
RAB32	0.0498983	4.45365e-07	0.00570334		HABP4	0.0859914	8.13324e-09	0.000104179		TFE3	0.0787798	2.56955e-16	3.29005e-12
RP11-69E11.4	0.0498125	1.56754e-19	2.00739e-15		CNOT6L	0.0858379	1.40508e-09	1.79977e-05		ZFP1	0.0787288	5.03238e-08	0.000644345
INPP5F	0.0497255	4.92403e-08	0.000630572		ST6GALNAC5	0.0858146	1.61986e-10	2.07488e-06		RP11-544A12.8	0.0785255	2.45356e-08	0.000314154
MAP2K3	0.0491478	7.54555e-07	0.00966283		FKBP10	0.0857479	3.06801e-07	0.00392982		PLXND1	0.0785119	4.76549e-07	0.00610173
PCYT1B	0.0491315	1.30731e-14	1.67414e-10		MECP2	0.0856282	9.0154e-08	0.00115478		RP11-11N9.4	0.0784671	1.04318e-13	1.33569e-09
CYP51A1	0.0491187	2.0029e-08	0.000256491		RNF8	0.0856241	1.59833e-07	0.0020473		NLN	0.0784359	8.21003e-08	0.00105121
PHLDB3	0.0491108	6.62891e-09	8.48898e-05		RPS6KL1	0.0853977	4.69208e-10	6.01009e-06		NFE2L1	0.0783554	1.06972e-08	0.000136967
MXRA7	0.0489463	7.00894e-07	0.00897565		RNF216	0.0852615	2.76036e-08	0.000353575		DUSP2	0.0783241	6.64828e-15	8.51246e-11
MAP6D1	0.0486088	2.59645e-09	3.32501e-05		ZNF669	0.0849914	5.64504e-08	0.000723073		CDH13	0.0782224	2.46545e-11	3.15676e-07
RP11-15A1.3	0.0485003	2.19571e-12	2.81182e-08		ERGIC1	0.0849808	5.80768e-07	0.00743906		SLC24A2	0.0781838	2.03431e-07	0.00260472
TNNI3	0.048418	1.35886e-12	1.74016e-08		MAGI3	0.084761	1.52203e-13	1.94957e-09		MEST	0.0780869	1.50325e-07	0.00192476
MAP3K8	0.0480859	7.92494e-08	0.00101487		SPG7	0.0847545	7.1829e-07	0.00920057		ZNF346	0.0779675	1.70865e-09	2.18776e-05
PLA2G16	0.0476819	1.49659e-10	1.91653e-06		TTC28	0.0846911	2.99574e-08	0.000383724		CHTF8	0.0779308	2.40829e-07	0.00308357
CDH11	0.0475893	2.07425e-13	2.65629e-09		RAPGEF2	0.0845763	3.65558e-11	4.68243e-07		MAFB	0.0779051	6.70016e-11	8.57888e-07
TMEM191B	0.047467	7.24016e-25	9.27175e-21		EXT2	0.0845131	1.01838e-10	1.30444e-06		MAGI3	0.0775445	4.29113e-08	0.000549436
PAQR6	0.0473236	1.18572e-12	1.51843e-08		NDE1	0.0843506	1.54512e-11	1.97915e-07		LRRC28	0.0774335	8.48638e-08	0.0010866
CMB9-22P13.1	0.0473088	1.01714e-12	1.30255e-08		SRRD	0.08433	3.41716e-13	4.37704e-09		MAP7D2	0.0773928	1.90232e-20	2.43573e-16
NOL4	0.0472613	2.87667e-09	3.68386e-05		FBXL12	0.0843108	2.27335e-09	2.91194e-05		TMEM121	0.0773767	1.11198e-07	0.00142377
VPS13B	0.0470326	3.69475e-08	0.00047315		SERTAD1	0.0842509	1.68014e-10	2.15209e-06		ISLR2	0.077122	5.83176e-10	7.46698e-06
ZNF880	0.0469837	7.85809e-11	1.00631e-06		RAB21	0.0841664	1.82459e-09	2.33712e-05		LNX1	0.0771148	3.42116e-14	4.38045e-10
NAIP	0.0468377	9.19436e-10	1.17743e-05		PDE4D	0.0840872	6.63777e-12	8.50233e-08		RP11-126K1.6	0.0771057	7.29338e-08	0.000933844
ATP8A1	0.046795	1.5872e-08	0.000203257		SOGA1	0.0840375	9.98182e-10	1.27857e-05		NECAP2	0.0770814	2.70774e-08	0.0003467
EEF1G	0.0463581	1.61181e-10	2.06408e-06		SYBU	0.0839563	1.50318e-14	1.92543e-10		TSTD1	0.0769577	1.72245e-21	2.20542e-17
TTLL5	0.0459338	6.48802e-07	0.00830856		ADCK4	0.083845	1.09129e-09	1.39784e-05		MAMLD1	0.0769215	2.19895e-18	2.81554e-14
ZNF350	0.0458325	3.60046e-24	4.61074e-20		FIGN	0.0838236	8.4576e-16	1.08333e-11		AGTPBP1	0.0768605	9.23852e-08	0.0011829
FAM124A	0.0455238	1.09271e-07	0.00139932		RIC3	0.0837851	3.0441e-09	3.89919e-05		RP11-166B2.1	0.0768455	4.93085e-34	6.31347e-30
B3GNT2	0.0454257	5.41053e-07	0.00692873		IGFBP4	0.0836603	4.75492e-15	6.09058e-11		NLRP2	0.0767499	1.34261e-33	1.71908e-29
PGF	0.045257	4.19482e-11	5.37188e-07		SLC25A14	0.0836064	6.30563e-11	8.07689e-07		NUDT10	0.0766896	5.92537e-08	0.000758685
PLAC9	0.0450025	1.70035e-08	0.000217747		C3orf38	0.0834274	3.7798e-07	0.00484154		DVL2	0.0766158	1.36467e-07	0.00174733
PXMP4	0.0449792	4.2746e-13	5.47406e-09		PHTF2	0.0834136	2.09827e-11	2.68767e-07		VPS9D1	0.0766097	2.63896e-09	3.37892e-05
SRC	0.0447711	6.56942e-08	0.00084128		PAM	0.083371	4.06428e-07	0.00520594		TNNT1	0.0765579	9.66305e-09	0.000123726
KCND3	0.0445662	4.50325e-11	5.76686e-07		MED24	0.0832137	6.48958e-10	8.31251e-06		FAM219A	0.0764623	2.37367e-07	0.00303925
ADORA2A-AS1	0.0445176	1.57241e-09	2.01363e-05		NDUFAF1	0.083143	7.20095e-11	9.22369e-07		HINFP	0.0763468	7.90874e-08	0.00101264
ASIC4	0.0443717	2.6312e-12	3.36951e-08		MGMT	0.0830789	1.23647e-22	1.58379e-18		ZNF675	0.0762821	2.21148e-08	0.000283158
ZNF335	0.0442442	1.40631e-10	1.80091e-06		CDK8	0.0829753	2.81106e-08	0.000360069		PELI1	0.0762493	6.51472e-09	8.34145e-05
RP11-33H15.1	0.0442063	1.3176e-17	1.68732e-13		CREBZF	0.0829298	3.73119e-08	0.000477929		CCDC126	0.0762216	1.72925e-09	2.21414e-05
PDZRN4	0.0440656	4.82571e-11	6.17981e-07		CDH4	0.0828081	1.53718e-08	0.000196897		SLC25A25	0.0761466	1.43554e-07	0.00183806
OTX2	0.0439802	1.82293e-11	2.33444e-07		ZC3H7A	0.0827945	6.87078e-07	0.00880078		TMEM161A	0.076133	7.19918e-10	9.21783e-06
AF003625.3	0.0438965	5.12235e-11	6.55968e-07		PSRC1	0.0825764	1.72844e-08	0.000221395		TMEM150C	0.0761191	4.15551e-17	5.32072e-13
ADAMTS18	0.0438685	1.3299e-13	1.70308e-09		KIF23	0.0825028	6.47422e-10	8.29283e-06		GTF2IRD2	0.0759188	1.38373e-08	0.000177173
OVOS2	0.0433723	4.81194e-09	6.16217e-05		KCNN3	0.0824791	5.21503e-08	0.000667993		FCHO1	0.0758555	2.06048e-09	2.63824e-05
DNM1	0.0431748	3.71746e-10	4.76058e-06		CASC4	0.0824685	2.62804e-08	0.000336626		TMEM151B	0.0758428	2.3882e-07	0.00305786
TDRKH	0.0430199	1.34092e-10	1.71718e-06		C17orf62	0.0824345	2.72404e-07	0.00348922		SPRTN	0.0757184	4.42813e-07	0.00566978
IFFO1	0.0427193	5.44824e-08	0.000697701		TRIB2	0.0823681	8.96378e-08	0.00114817		CHN2	0.0757047	6.78883e-13	8.69242e-09
LOX	0.0425972	7.08354e-09	9.07118e-05		RPRD2	0.0823133	1.45528e-07	0.00186407		SH3RF1	0.0756427	2.24169e-13	2.87026e-09
LINC00937	0.0423995	2.57951e-09	3.30332e-05		SGK223	0.0821755	2.55041e-16	3.26682e-12		ZCCHC18	0.0756124	6.45929e-10	8.27047e-06
MTFP1	0.042336	6.38415e-10	8.17554e-06		FAM189B	0.0821644	3.15585e-09	4.04233e-05		KIAA1644	0.0755883	9.04591e-10	1.15824e-05
PCDHGB6	0.042171	7.14861e-08	0.000915451		SP3	0.0821509	2.59375e-08	0.000332234		SMAD1	0.0755797	1.71865e-08	0.000220056
MAF	0.0421589	4.08826e-12	5.23542e-08		ZNF138	0.0819802	6.65761e-10	8.52774e-06		NKRF	0.0755709	1.78776e-07	0.00228904
TMEM150C	0.0419932	9.75969e-10	1.24983e-05		GKAP1	0.0818636	5.82589e-07	0.00746239		SCMH1	0.0753656	8.59494e-08	0.0011005
RCAN2	0.0418664	3.54948e-18	4.54546e-14		TMEM245	0.0817182	4.491e-07	0.00575252		TNFAIP1	0.0753387	2.73768e-07	0.00350533
ATXN1	0.0418598	2.00757e-13	2.5709e-09		CORO7	0.0815748	2.11134e-10	2.70441e-06		ZNF574	0.0753082	7.73764e-10	9.90728e-06
LHPP	0.0417612	1.05601e-07	0.00135233		CDK11A	0.0815308	5.00875e-09	6.41571e-05		NRSN1	0.0753077	3.92432e-07	0.0050247
FLRT2	0.0416738	4.40707e-09	5.64369e-05		CDKN2C	0.0813476	4.14617e-11	5.31083e-07		SVOP	0.0752578	2.82449e-08	0.000361647
SIRPA	0.0415313	1.5547e-09	1.99095e-05		XRCC1	0.081335	3.82422e-08	0.000489844		SPATS2L	0.0752087	3.9627e-09	5.07384e-05
C21orf62	0.0414108	5.48437e-12	7.02329e-08		HES5	0.0812746	1.07717e-09	1.37975e-05		ZNF785	0.0750413	3.14661e-07	0.00402892
RASA3	0.0410656	6.17882e-08	0.00079126		SNX27	0.0811302	1.39211e-07	0.00178316		MUC20	0.0750346	1.37341e-18	1.75851e-14
LOXL1-AS1	0.0409989	3.1504e-11	4.0344e-07		COL11A1	0.0809918	6.70936e-09	8.59403e-05		CKMT1B	0.0750327	3.85694e-11	4.93843e-07
RAPGEF6	0.040862	1.4852e-07	0.00190195		SERPINH1	0.0809905	2.32876e-09	2.98291e-05		RP11-15A1.3	0.075011	3.44396e-15	4.40965e-11
PCDH19	0.0407929	1.02917e-12	1.31795e-08		CHERP	0.0808622	9.38662e-09	0.000120233		TMEM129	0.0749338	2.60057e-09	3.32977e-05
MYH7B	0.0407476	7.31871e-13	9.37234e-09		PPM1A	0.0807159	6.16512e-07	0.00789691		VCPKMT	0.074919	1.93697e-08	0.000248009
SDCBP2	0.0406256	2.32476e-09	2.97709e-05		LRIG1	0.0806648	5.02546e-11	6.43711e-07		MED22	0.0748288	4.57277e-07	0.00585498
GLMP	0.0402915	4.36557e-09	5.59055e-05		NR1D2	0.0804128	5.12354e-15	6.56274e-11		CFLAR	0.0748037	1.91359e-12	2.45016e-08
NCAM2	0.040213	2.90122e-07	0.00371531		MICU3	0.0803967	8.96971e-09	0.000114893		TXNDC16	0.0747267	2.71243e-07	0.00347299
LAMB1	0.0399646	5.452e-19	6.98183e-15		FADS3	0.0803013	4.6351e-13	5.9371e-09		MYOM2	0.0746042	4.62618e-30	5.92336e-26
SHANK2	0.039915	1.48358e-07	0.00189987		ADAM17	0.0801904	1.02485e-07	0.00131273		TRIM41	0.0745296	1.10671e-09	1.41703e-05
ZNF404	0.0393844	6.5974e-12	8.44864e-08		TDRKH	0.0801698	1.20661e-16	1.54555e-12		DGKE	0.0745011	1.4607e-07	0.00187027
LRRC10B	0.0392807	3.46047e-07	0.00443147		ZNF581	0.0800636	3.19693e-07	0.00409495		MFHAS1	0.0743145	6.55595e-07	0.00839424
MAP3K3	0.039168	3.10629e-09	3.97791e-05		EPB41L2	0.0800195	2.39411e-08	0.000306661		KLC4	0.0742569	7.43274e-07	0.00951688
APOC1	0.0390105	8.5143e-11	1.09034e-06		RNF44	0.0797534	1.18317e-11	1.51552e-07		MAP3K11	0.0742505	1.64273e-07	0.00210335
SLC27A3	0.0389655	2.86792e-07	0.00367266		CLK4	0.0796297	2.59735e-09	3.32695e-05		RP4-798A10.7	0.0742249	1.19386e-09	1.52862e-05
CSMD2	0.0386582	7.12219e-12	9.12067e-08		SCAF4	0.0796038	4.05837e-07	0.00519837		TPST1	0.0741357	2.33357e-07	0.00298791
LRRTM3	0.0386205	3.97174e-10	5.08621e-06		RP11-397G17.1	0.0795565	9.15719e-17	1.17294e-12		ARL17B	0.0740787	4.1738e-08	0.000534413
GRIN2B	0.0386198	1.1303e-12	1.44746e-08		MN1	0.0795471	1.94192e-09	2.4874e-05		SPHKAP	0.0740219	4.92018e-09	6.2998e-05
CCDC144A	0.0385781	2.26895e-08	0.000290562		DAPK1	0.0794755	7.89668e-13	1.01149e-08		HGF	0.0739088	1.83742e-19	2.35263e-15
LINC00869	0.0383443	8.81317e-08	0.00112861		ASGR1	0.0794034	1.54827e-07	0.00198318		AC004951.6	0.0738109	1.03752e-09	1.32844e-05
RP11-166B2.1	0.0382497	3.03839e-20	3.89097e-16		SORD	0.0793863	6.52994e-08	0.00083642		FLRT3	0.0737852	5.14862e-08	0.000659229
NSUN7	0.0381547	1.44328e-08	0.000184827		SH3GLB1	0.0792817	3.03153e-07	0.00388309		GREM2	0.0734253	8.61674e-14	1.10329e-09
LINC01116	0.0380345	1.11068e-10	1.42233e-06		UBAP1	0.0791998	1.38262e-08	0.0001771		SLC1A4	0.0732816	9.01573e-11	1.15437e-06
AKAP6	0.0379722	2.95069e-08	0.000377866		WSB2	0.079132	3.8516e-07	0.00493352		ZNF335	0.0732086	2.22066e-13	2.84334e-09
EIF2AK3	0.0372693	1.13809e-09	1.45743e-05		MAX	0.0790812	6.95273e-08	0.000890575		SIMC1	0.0732042	6.80565e-09	8.71396e-05
CECR1	0.0371408	4.35682e-08	0.000557934		RP11-11N9.4	0.0789703	5.86193e-12	7.50854e-08		HECTD2	0.0730287	7.79682e-08	0.000998305
B4GALNT1	0.036803	9.74515e-09	0.000124796		AEBP2	0.0789634	4.74949e-11	6.08362e-07		TMEM222	0.0729827	1.26594e-07	0.00162091
KDELC2	0.0368013	2.60396e-07	0.00333463		C17orf51	0.0789522	1.4669e-09	1.87896e-05		LAMB1	0.0729761	4.36918e-18	5.5943e-14
STC1	0.0367772	1.35887e-07	0.00174017		PEX19	0.07878	5.03217e-08	0.00064457		AC240274.1	0.0729108	3.70383e-11	4.74238e-07
UBE2QL1	0.0364614	1.78151e-13	2.2814e-09		ZBTB11	0.0787574	9.78911e-11	1.25389e-06		PPP1R18	0.0728372	5.85306e-07	0.00749426
RP11-262H14.3	0.0364242	7.79676e-19	9.98453e-15		ZNF250	0.0786802	7.37581e-09	9.44768e-05		CRY1	0.0727462	1.15128e-07	0.0014741
PRR7-AS1	0.0359463	1.92149e-12	2.46066e-08		GANAB	0.0786136	1.07248e-08	0.000137374		ANKRD13B	0.0725459	6.31403e-07	0.00808449
LINC00847	0.0359112	8.39417e-12	1.07496e-07		VEPH1	0.0786076	1.29744e-10	1.66189e-06		RND3	0.0724205	1.78802e-07	0.00228938
PCDHB16	0.0358803	3.55097e-12	4.54737e-08		MGME1	0.0785441	6.16747e-10	7.89991e-06		RP11-302B13.5	0.0724194	1.92115e-16	2.45984e-12
APOL2	0.0355947	5.41139e-08	0.000692982		RCCD1	0.0784209	5.86251e-14	7.50929e-10		RP11-395A13.2	0.07219	1.54987e-08	0.000198446
RP11-413H22.2	0.0352267	1.11536e-08	0.000142833		E2F4	0.0782475	2.76205e-08	0.000353791		IFI44	0.0720679	5.28332e-09	6.76476e-05
NHSL2	0.0349873	3.26516e-08	0.000418137		PAG1	0.0782387	5.83752e-08	0.000747728		ZNF692	0.0720302	2.56097e-07	0.00327906
SLC4A4	0.0346238	3.93248e-07	0.00503593		YARS2	0.0782063	2.31737e-07	0.00296832		MAN2A2	0.0718158	4.41669e-11	5.65513e-07
ZNF585A	0.0343239	1.67457e-09	2.14446e-05		OSBPL10	0.0781273	1.17824e-19	1.50921e-15		EHD1	0.0717902	6.39109e-07	0.00818315
NEXN	0.0339863	4.74229e-08	0.000607298		ZNF675	0.0780156	3.15339e-10	4.03917e-06		HSPA6	0.0717507	1.11682e-19	1.42998e-15
SYT6	0.0339232	1.04211e-11	1.33453e-07		ZIK1	0.0779411	5.0168e-11	6.42602e-07		KTI12	0.0717123	7.79148e-11	9.97621e-07
PPP1R14A	0.0337625	2.79244e-11	3.576e-07		TINF2	0.0779141	4.26304e-07	0.00546053		RANGAP1	0.0716884	1.28894e-08	0.000165035
ATL3	0.0335375	5.55372e-09	7.11209e-05		SERAC1	0.0778928	9.6679e-14	1.23836e-09		GPR108	0.0715915	7.86358e-14	1.00685e-09
CHST1	0.0329502	4.94187e-12	6.32855e-08		BCAR1	0.0778669	4.02796e-07	0.00515941		FBXL20	0.07152	4.91208e-07	0.00628943
TGM4	0.0328296	3.88987e-15	4.98137e-11		MOB3B	0.07786	5.68095e-08	0.000727673		RP11-254F7.2	0.0712384	6.02935e-17	7.71998e-13
PCDHB9	0.0326252	1.1319e-08	0.000144951		TACC2	0.0778458	9.61007e-09	0.000123095		RHPN1	0.0709431	2.05771e-09	2.63469e-05
GFOD1	0.0323815	3.11222e-09	3.98551e-05		RBM12	0.0777103	4.22355e-09	5.40994e-05		CTSL	0.0708049	3.77487e-08	0.000483335
FAM65B	0.0323677	4.72543e-14	6.05139e-10		KLHL20	0.0776156	2.03597e-07	0.00260787		C19orf81	0.0707755	3.51177e-11	4.49648e-07
RNU12	0.0320573	3.51178e-07	0.00449718		SLK	0.077579	4.15855e-07	0.00532669		HEXIM2	0.0707194	1.60925e-08	0.000206048
FRRS1L	0.0318619	2.27543e-09	2.91392e-05		ISG20L2	0.0775682	8.46885e-08	0.00108477		DNAJA3	0.0706344	3.40335e-07	0.00435765
CCDC180	0.0318612	1.08737e-11	1.39248e-07		FBRSL1	0.0771273	5.09965e-07	0.00653214		TUBB3	0.0704696	1.36134e-12	1.74306e-08
OLMALINC	0.0317278	3.09938e-07	0.00396907		YTHDF3	0.0768922	2.85646e-09	3.65884e-05		DCAF4	0.0704384	2.37849e-12	3.04542e-08
TENM2	0.0315064	1.86705e-13	2.39095e-09		KDM2A	0.0768916	7.15647e-09	9.16673e-05		CCZ1B	0.0703377	5.42998e-07	0.00695255
EPHA6	0.0311964	3.47968e-12	4.45608e-08		C20orf194	0.0768098	4.77102e-08	0.000611119		HNRNPA1L2	0.0700929	9.58531e-08	0.0012273
SEZ6L2	0.0311954	5.22367e-10	6.68944e-06		C11orf54	0.0766758	8.43655e-09	0.000108064		OSBPL1A	0.0700584	2.45223e-08	0.000313984
SHROOM2	0.030866	3.13615e-07	0.00401616		MTPAP	0.0765727	5.80089e-09	7.43036e-05		TMEM108	0.0700054	3.73105e-07	0.00477723
DND1	0.0306663	6.95263e-12	8.90353e-08		GUSB	0.076566	2.51043e-09	3.21561e-05		MEN1	0.06969	7.50293e-08	0.000960675
ANKAR	0.0306008	6.83023e-08	0.000874679		PIK3C2A	0.0765167	1.07266e-07	0.00137398		FAM131B	0.0695542	1.36926e-07	0.0017532
PNCK	0.0305422	4.36162e-07	0.00558549		MALT1	0.076473	2.08827e-17	2.67486e-13		UCK2	0.0693643	1.72486e-07	0.00220852
SORL1	0.0304395	1.34811e-07	0.00172639		POMGNT1	0.0764631	3.69792e-07	0.00473667		GSKIP	0.069349	7.06307e-07	0.00904356
NPAS2	0.0304191	6.49714e-11	8.32024e-07		RND1	0.0763962	2.65577e-13	3.40177e-09		ZSCAN32	0.0693201	5.02655e-09	6.436e-05
BCL6	0.0303096	1.33777e-08	0.000171315		THAP1	0.0763396	1.08504e-08	0.000138983		PPP1R3F	0.0693073	3.38698e-08	0.000433668
NPIPA1	0.0302648	2.25415e-07	0.00288666		TCOF1	0.07631	1.11297e-07	0.0014256		DIMT1	0.0692944	2.02041e-07	0.00258694
RP11-386G11.10	0.0295383	3.90565e-07	0.00500158		PYGB	0.0762611	1.44807e-08	0.000185483		GTF2IRD1	0.0691308	2.93474e-08	0.000375764
TSTD1	0.0292548	2.19496e-09	2.81087e-05		AMMECR1	0.0761334	1.14493e-14	1.46654e-10		AC004556.1	0.0690454	1.4508e-27	1.85761e-23
RP1-239B22.5	0.0291283	2.19976e-08	0.000281702		ACSS2	0.0760673	4.67687e-10	5.9906e-06		PRPF3	0.0689341	1.43711e-08	0.000184007
ITM2A	0.0287599	1.78888e-08	0.000229084		LHFP	0.0759427	1.21852e-12	1.5608e-08		MAST2	0.0689295	5.61502e-08	0.000718948
MYD88	0.028437	6.01382e-08	0.000770129		COL4A2	0.075778	6.53329e-08	0.00083685		AL592183.1	0.0687854	7.95224e-28	1.0182e-23
CTD-2008L17.2	0.0284236	3.269e-11	4.18628e-07		AC010287.1	0.0757745	1.2984e-19	1.66312e-15		ATF1	0.0687432	6.25611e-08	0.000801033
NR1D1	0.0282664	1.94513e-08	0.000249093		RBM38	0.0755638	6.54111e-08	0.000837851		COG7	0.0685797	2.08351e-09	2.66773e-05
TMEM213	0.0282602	2.46644e-08	0.000315852		IQGAP2	0.0755092	4.36993e-08	0.000559745		ZNF568	0.0685602	6.60165e-12	8.45275e-08
ADGRA1	0.0280406	7.69119e-08	0.000984934		STX16	0.0755058	1.35327e-08	0.00017334		TMEM260	0.0685409	4.86908e-10	6.23437e-06
PIPOX	0.0278849	8.95712e-09	0.000114705		NDUFA7	0.0754011	1.21653e-09	1.55825e-05		MFSD2A	0.0685085	8.51862e-12	1.09072e-07
PDE2A	0.0275756	2.41088e-10	3.08737e-06		UCK1	0.0753012	5.14529e-08	0.00065906		ZNF804A	0.0682846	7.82042e-09	0.000100133
SEMA3B	0.027498	1.01912e-08	0.000130508		CTPS2	0.075275	4.4322e-14	5.67721e-10		MED25	0.0681373	1.99498e-07	0.00255437
GABRA3	0.0273857	1.0797e-07	0.00138266		SGCE	0.0752718	7.60109e-08	0.000973623		ATG4A	0.0680996	7.08711e-11	9.07433e-07
MYO1F	0.0266976	1.88938e-08	0.000241954		ZNF544	0.075206	3.08998e-08	0.000395796		RAP2B	0.0680984	5.51715e-07	0.00706416
NLRP2	0.0266636	3.03187e-15	3.88261e-11		AKAP5	0.0751698	1.0997e-13	1.40861e-09		B4GALT4	0.0679569	1.18e-07	0.00151088
NOMO3	0.0262145	3.84291e-07	0.00492124		MELK	0.0750898	2.54852e-10	3.2644e-06		IKBKG	0.0679382	9.48124e-09	0.000121398
RP11-276H19.2	0.0260913	4.30382e-11	5.51147e-07		TMEM2	0.0749542	3.68362e-14	4.71835e-10		MT-ATP8	0.0679202	1.38761e-14	1.7767e-10
TMEM79	0.0253264	7.2257e-07	0.00925324		ATP13A2	0.0749011	4.29832e-08	0.000550572		LRTM2	0.0679084	2.15086e-12	2.75396e-08
GCNT2	0.0249372	3.536e-07	0.0045282		TCF7L2	0.0746182	1.15728e-07	0.00148236		PTCD1	0.0678926	4.50065e-11	5.76264e-07
ZNF829	0.024345	2.5139e-12	3.2193e-08		CRYZ	0.0745694	1.15667e-28	1.48158e-24		OSBPL11	0.0678522	5.80008e-10	7.42642e-06
PLGLB1	0.0238763	6.53973e-07	0.00837478		APBB2	0.0745277	7.21435e-12	9.24086e-08		KDM6A	0.0676573	1.7342e-08	0.000222046
GRIK2	0.023141	1.33761e-11	1.71294e-07		FLNA	0.0744525	1.37885e-07	0.00176617		C16orf52	0.0676232	3.10849e-07	0.00398011
SST	0.0229685	2.12245e-07	0.00271801		TIPARP	0.0743881	2.81307e-13	3.60327e-09		FAM199X	0.0675943	6.58136e-09	8.42677e-05
SYT4	0.0227428	1.9799e-09	2.53546e-05		MND1	0.0743621	1.28399e-09	1.64466e-05		PURG	0.0674332	3.11892e-09	3.99347e-05
SYNPR	0.0224581	6.93052e-11	8.87523e-07		PELI1	0.0743552	6.85017e-09	8.77439e-05		CDH24	0.0674041	1.95313e-07	0.00250078
DPP6	0.0215719	3.22306e-13	4.12745e-09		ZNF273	0.0742977	3.01622e-12	3.86348e-08		KAT2A	0.0672806	6.00881e-08	0.000769368
DLX6-AS1	0.0215686	1.98907e-11	2.54721e-07		MYBL2	0.0741319	1.63224e-12	2.09073e-08		CDK14	0.0671798	2.78171e-09	3.5617e-05
RP11-493L12.4	0.0213671	2.91118e-08	0.000372806		RFWD2	0.0740922	6.87099e-08	0.000880106		PRKD3	0.0671267	6.64728e-08	0.000851118
ZNF454	0.0212494	3.6321e-07	0.00465127		HDAC6	0.0740434	1.70759e-10	2.18725e-06		TAMM41	0.0671168	1.07986e-08	0.000138266
KCNMA1	0.0205129	2.33499e-07	0.00299019		CREBRF	0.0739482	6.80197e-08	0.000871264		CABYR	0.0670653	3.31189e-12	4.24055e-08
SLC43A3	0.0200817	1.83719e-07	0.00235271		IGSF3	0.0738648	1.4605e-07	0.00187076		ZNF385D	0.0668297	1.76407e-13	2.25871e-09
MYO15A	0.0197981	1.95181e-07	0.00249948		SPTY2D1	0.07382	5.8427e-08	0.000748392		NFS1	0.066724	7.091e-07	0.00907931
LILRB3	0.0194334	2.30261e-08	0.000294872		FAM179B	0.0737925	5.14904e-08	0.000659541		NPAT	0.0664725	1.04914e-07	0.00134331
CTD-2162K18.4	0.0193052	3.07744e-10	3.94097e-06		IQCB1	0.073777	2.40607e-07	0.00308193		SEL1L	0.0663484	7.40044e-07	0.00947553
DLX5	0.0185918	2.02072e-09	2.58774e-05		DNM2	0.0737361	2.96445e-09	3.79716e-05		SMPD3	0.0663354	2.21109e-10	2.83108e-06
FAM218A	0.018212	1.57632e-11	2.01864e-07		PCYT2	0.0737267	8.49046e-08	0.00108754		TMEM47	0.0662706	5.51342e-09	7.05938e-05
RP11-347P5.1	0.0174349	8.26194e-10	1.05802e-05		SHF	0.0737055	5.6361e-08	0.000721928		YJEFN3	0.0661869	3.60872e-07	0.0046206
SORCS3	0.013032	9.79767e-08	0.00125469		NINL	0.0736487	2.14704e-08	0.000275014		RPUSD4	0.0661055	6.34147e-07	0.00811962
RP11-414C23.1	-0.0200554	1.37961e-08	0.000176672		RNF4	0.0736062	5.49549e-07	0.00703918		SLC16A1	0.0660991	3.10403e-07	0.00397441
URB1-AS1	-0.0220363	3.99958e-09	5.12186e-05		SLA	0.0735617	2.02713e-10	2.59655e-06		ZNF454	0.0660075	4.26366e-21	5.45919e-17
S100A11	-0.0245259	9.73153e-09	0.000124622		RFXAP	0.0735455	5.58401e-08	0.000715256		JMJD6	0.0659943	3.01419e-08	0.000385937
IRAK1	-0.0259662	4.87097e-09	6.23776e-05		ZYX	0.0735449	9.73245e-08	0.00124663		MUL1	0.0658839	1.21913e-08	0.000156097
TXNRD2	-0.0260588	7.90649e-10	1.01251e-05		NPAS3	0.0733749	4.49086e-08	0.000575234		FNDC3B	0.0658292	8.70109e-08	0.00111409
CTD-2325M2.1	-0.0261156	7.08938e-09	9.07866e-05		RASA2	0.0731279	7.70096e-10	9.86416e-06		ST8SIA1	0.0657175	7.54603e-07	0.00966193
ST7-AS1	-0.0278478	1.59227e-09	2.03907e-05		CSNK1G2	0.0730918	2.54812e-09	3.26389e-05		TMEM191B	0.0655785	1.90494e-20	2.43908e-16
COL1A2	-0.0281277	4.72726e-07	0.00605372		KCTD5	0.0729381	4.93118e-08	0.000631634		LINC01116	0.0653619	4.57348e-18	5.85589e-14
COL1A1	-0.0284931	6.57269e-08	0.000841698		ZNF680	0.0728581	3.98351e-11	5.10248e-07		MAOA	0.0652851	6.85652e-13	8.77909e-09
RP11-65I12.1	-0.0297444	1.47877e-10	1.89371e-06		CPT1C	0.0728442	1.36914e-07	0.00175373		ZNF584	0.0651594	4.10653e-08	0.0005258
FAM101B	-0.0303973	1.91712e-07	0.00245507		FAM213B	0.072779	3.9851e-10	5.10452e-06		PPP1R16A	0.065132	3.41868e-07	0.00437728
S100A10	-0.0311541	2.44343e-07	0.00312906		AP006222.2	0.0727761	7.2093e-08	0.000923439		ATG2A	0.0650461	2.58814e-07	0.00331385
PPP1R1B	-0.0313358	6.79819e-10	8.70576e-06		DUSP10	0.072744	1.88126e-12	2.40971e-08		ZNF516	0.064746	7.9666e-13	1.02004e-08
TSTD3	-0.0335019	4.36776e-07	0.00559336		DAG1	0.0724663	2.50355e-09	3.2068e-05		DHRS1	0.0645992	3.12256e-08	0.000399813
SOX15	-0.0335656	7.82935e-08	0.00100263		CHN2	0.072428	7.96632e-08	0.00102041		LRP11	0.0645662	4.36203e-08	0.000558514
PENK	-0.0365802	3.17191e-07	0.00406194		LONRF1	0.0723708	2.70774e-08	0.000346834		PDE4B	0.0642206	9.5552e-08	0.00122345
ROM1	-0.0372174	6.972e-07	0.00892834		BMP7	0.0723306	7.9499e-08	0.0010183		IFFO1	0.064114	2.90243e-10	3.71627e-06
SLC7A11	-0.0375252	2.02503e-10	2.59325e-06		SPSB4	0.0723216	6.80695e-10	8.71903e-06		TFIP11	0.0639855	1.44499e-08	0.000185016
SEZ6L	-0.037715	2.5908e-07	0.00331778		PAPD4	0.0723127	4.86352e-10	6.22968e-06		ZCCHC8	0.0638791	2.30857e-07	0.0029559
RP11-212P7.2	-0.0385257	4.22228e-07	0.00540705		2003-03-01	0.0721567	4.74431e-15	6.07698e-11		CRTAP	0.0634418	1.20021e-09	1.53674e-05
AFP	-0.0386102	3.36403e-14	4.30798e-10		CBWD1	0.0720952	7.43602e-08	0.00095248		C17orf75	0.0634389	9.41419e-09	0.000120539
DCN	-0.0390456	3.68762e-11	4.72237e-07		RAD9A	0.0718985	3.89409e-09	4.98794e-05		SLC25A44	0.0634193	3.28734e-08	0.000420911
RP3-402G11.26	-0.0397744	3.55142e-08	0.000454795		SLC1A3	0.0717992	6.88115e-07	0.00881406		HS3ST1	0.0633942	3.43339e-10	4.39611e-06
PIK3CD-AS2	-0.0399037	1.45738e-11	1.86633e-07		GRIA1	0.0717886	2.94341e-08	0.000377022		MAGEE1	0.0633939	6.92527e-07	0.00886711
C1QL1	-0.0400608	1.92158e-08	0.000246078		YTHDC2	0.0717586	4.29418e-07	0.00550042		PPP5D1	0.0632012	6.67038e-10	8.54075e-06
APOA2	-0.0408747	8.27869e-15	1.06017e-10		DLX6-AS1	0.0716467	6.56231e-13	8.40567e-09		SOX9	0.0630992	5.72043e-08	0.000732444
GAS8	-0.0421394	4.4916e-12	5.75194e-08		PDZD8	0.0716256	7.34253e-07	0.00940504		SPECC1	0.0629968	1.57967e-08	0.00020226
SP8	-0.0432875	2.49431e-07	0.00319421		GOLGA6L10	0.0714203	7.81735e-11	1.00132e-06		HPCAL4	0.0629864	1.30727e-07	0.00167383
KRT18	-0.0434423	1.33457e-08	0.000170905		EHD1	0.0713768	3.88649e-08	0.00049782		C17orf49	0.0628177	1.23813e-07	0.00158531
SRRM2	-0.0434724	1.9712e-07	0.00252432		CYFIP1	0.071359	4.44769e-08	0.000569705		RP11-841O20.2	0.0628104	4.61392e-08	0.000590766
ZFPM1	-0.0443373	4.05999e-16	5.19923e-12		ZNF512	0.0711825	2.87432e-09	3.68172e-05		BACE1	0.0627916	3.01715e-07	0.00386316
IGF2	-0.0449943	3.40661e-13	4.36251e-09		MAPK14	0.0711562	2.06541e-08	0.000264558		WDR20	0.062724	7.33692e-07	0.00939419
MAPK12	-0.0450965	2.27422e-07	0.00291236		C1orf27	0.0710307	5.28154e-07	0.00676513		RP1-239B22.5	0.0626834	3.90671e-13	5.00216e-09
CRACR2B	-0.0463428	3.94933e-12	5.05752e-08		NMRAL1	0.0710256	5.94132e-15	7.61024e-11		VLDLR	0.062626	3.20797e-07	0.00410749
NEUROG1	-0.0469467	3.16379e-07	0.00405156		TXNDC16	0.0709586	1.04621e-08	0.000134009		ADCK3	0.0624579	7.63563e-09	9.77667e-05
APOA1	-0.0472086	7.5984e-15	9.73051e-11		UBE2QL1	0.0709481	4.44931e-12	5.69912e-08		RNASEK	0.0624119	5.89621e-08	0.000754951
ATOH8	-0.047619	7.23364e-12	9.2634e-08		OSBP	0.0709192	1.04901e-09	1.34368e-05		ELK1	0.0622384	7.52276e-08	0.000963214
C11orf70	-0.0486769	3.57572e-08	0.000457907		FGF12	0.0708954	5.50032e-14	7.04536e-10		U73166.2	0.0618506	9.96796e-10	1.2763e-05
PCK2	-0.0492691	8.42564e-09	0.000107899		WHAMM	0.07088	4.2017e-09	5.38196e-05		DCUN1D4	0.0617963	1.04693e-07	0.00134049
USP9Y	-0.0492981	1.78758e-20	2.28917e-16		GEMIN8	0.0708186	1.32447e-09	1.69652e-05		PVRL3	0.0616791	2.73366e-13	3.50018e-09
TMSB4Y	-0.0494101	1.25018e-18	1.60098e-14		SNHG18	0.0707503	4.06832e-15	5.21111e-11		KNSTRN	0.061544	1.78231e-07	0.00228207
DKKL1	-0.0497795	1.9328e-07	0.00247515		GCFC2	0.0705946	6.28008e-14	8.04415e-10		PLEKHH2	0.0615219	4.27431e-13	5.47282e-09
ZFY	-0.0504315	2.54844e-20	3.26354e-16		TRIM11	0.0705693	9.85603e-09	0.000126246		OCLN	0.0614048	3.62441e-18	4.64069e-14
NLGN4Y	-0.0504703	2.54844e-20	3.26354e-16		AC240274.1	0.0705493	1.01643e-14	1.30195e-10		LEF1	0.0613802	1.13687e-09	1.45565e-05
AGAP2-AS1	-0.0508751	3.70607e-09	4.74599e-05		RNF149	0.0705365	4.1164e-09	5.2727e-05		KIF22	0.0613513	3.25335e-07	0.00416558
CTC-260E6.6	-0.0509109	5.0719e-07	0.00649507		PPAT	0.0704759	5.66038e-08	0.000725038		ABCA3	0.0613116	8.00497e-08	0.00102496
ITCH	-0.0533757	4.71691e-07	0.00604048		TMSB15B	0.0703677	4.54998e-09	5.82807e-05		NOP2	0.0612625	1.80209e-07	0.0023074
CISD3	-0.0536974	1.9046e-08	0.000243903		DDX19A	0.0702028	3.32752e-07	0.00426222		USP27X	0.0611154	1.40064e-07	0.00179338
ABHD6	-0.0539138	2.5024e-09	3.20458e-05		MXD3	0.0701858	7.40258e-07	0.00948196		ZNF286A	0.061108	9.9645e-08	0.00127585
PHOSPHO2	-0.0541574	3.67204e-09	4.70241e-05		MMP15	0.0700887	9.20479e-09	0.000117904		SMPD4	0.0609858	1.39453e-07	0.00178556
ETV4	-0.0544731	4.96588e-11	6.35931e-07		PRTFDC1	0.0700081	6.8915e-11	8.82732e-07		PPIL6	0.0607784	3.99987e-07	0.00512143
FAP	-0.0545121	7.90758e-17	1.01264e-12		CDC25B	0.0699599	8.76655e-08	0.00112291		PXMP4	0.0607128	4.89919e-13	6.27293e-09
POMZP3	-0.0558058	1.82451e-07	0.00233646		NKRF	0.0697967	2.05373e-08	0.000263062		ARHGEF10	0.060551	4.37502e-08	0.000560178
PSMD5	-0.0560771	7.27668e-12	9.31851e-08		ALG13	0.069765	2.9797e-10	3.81669e-06		BRINP3	0.060115	1.73125e-11	2.21669e-07
CHAC1	-0.0563351	3.87944e-16	4.96801e-12		ZNF43	0.0697416	1.06416e-07	0.00136309		LINC01260	0.0599402	2.7265e-11	3.49102e-07
ANGPTL1	-0.0568054	1.15235e-08	0.00014757		RAD51AP1	0.0692838	2.4198e-08	0.000309952		WBSCR16	0.059854	5.78341e-07	0.00740508
DOCK1	-0.0569027	7.70518e-09	9.86725e-05		PCDHGB6	0.0692379	4.2815e-08	0.000548417		KANSL1-AS1	0.0597391	4.97457e-19	6.36944e-15
NBL1	-0.0573838	7.71355e-09	9.87798e-05		RNF103	0.0691581	2.96568e-08	0.000379873		RFX7	0.0596213	2.1721e-08	0.000278116
MYO1B	-0.0575318	5.23474e-09	6.70361e-05		TRAPPC2	0.069105	6.33101e-09	8.10939e-05		CACNA1C	0.0595042	4.22558e-08	0.000541044
CCDC71L	-0.0582167	1.31117e-09	1.67909e-05		PTX3	0.0690752	2.05217e-11	2.62863e-07		ZNF408	0.0594645	2.48587e-08	0.000318291
LINC01184	-0.0584006	4.4249e-07	0.00566653		DENND5A	0.0690395	6.74302e-11	8.63714e-07		USPL1	0.059426	5.91346e-08	0.00075716
SOCS3	-0.0585964	2.09693e-10	2.68533e-06		OPHN1	0.0690187	1.45105e-07	0.00185866		RP5-1042K10.10	0.0594195	8.63628e-08	0.00110579
GPRC5C	-0.0587551	5.57909e-12	7.14458e-08		SUPT7L	0.0690106	6.39291e-08	0.000818868		FAM218A	0.059326	1.62175e-26	2.07649e-22
ASL	-0.0593333	2.11225e-09	2.70495e-05		LIPG	0.0688937	1.39366e-16	1.78513e-12		ZNF90	0.059237	4.16845e-07	0.00533728
WWC2	-0.0593362	8.8776e-10	1.13686e-05		SMAD1	0.0688419	2.14557e-07	0.00274826		SORCS3	0.0591727	2.05409e-12	2.63006e-08
PARD6G-AS1	-0.0597376	7.39702e-12	9.47262e-08		MTF1	0.0687404	1.1763e-08	0.000150672		GORASP1	0.0588521	3.56221e-09	4.56106e-05
RP11-390F4.6	-0.0600607	2.04862e-08	0.000262347		ZBTB22	0.0686381	1.10377e-07	0.00141382		SPPL2B	0.0586772	2.96817e-07	0.00380045
LUM	-0.0604256	3.21831e-11	4.12137e-07		FRY	0.0686007	6.88403e-12	8.81776e-08		FRY	0.058151	8.59391e-08	0.00110036
PUS7L	-0.0604619	6.11123e-07	0.00782604		WASH1	0.0685448	3.23851e-07	0.00414821		HBEGF	0.0581274	1.48449e-08	0.000190074
ZMYND19	-0.0606357	2.81338e-07	0.00360281		BCL2	0.0684101	3.78611e-10	4.84962e-06		TMEM184B	0.057929	5.93948e-08	0.000760491
RP11-12G12.7	-0.0606625	2.36522e-08	0.000302891		GNAI1	0.0683635	2.80785e-07	0.00359658		SNTB2	0.0577898	5.0556e-08	0.000647319
TTTY14	-0.0614215	3.5862e-22	4.59249e-18		VASH1	0.068217	1.23241e-08	0.000157859		TAB1	0.0576848	4.77627e-07	0.00611554
HEG1	-0.0617064	9.60207e-10	1.22964e-05		CCDC94	0.0681775	7.39572e-08	0.000947318		NAIP	0.0576737	2.76067e-09	3.53476e-05
EID2B	-0.0637245	3.31853e-07	0.0042497		ALDH18A1	0.0678795	8.81348e-08	0.00112892		NAGPA	0.0576295	4.36284e-07	0.00558618
2001-03-01	-0.0641095	8.14792e-09	0.000104342		ZNF785	0.06784	3.25267e-09	4.16634e-05		B3GALNT1	0.0574137	1.33658e-07	0.00171136
B9D1	-0.0649881	2.16362e-07	0.00277074		RNF169	0.0678302	9.16497e-08	0.00117394		RP11-499E18.1	0.057098	4.06602e-10	5.20613e-06
DUSP23	-0.0667682	9.96162e-10	1.27569e-05		WDR47	0.0677938	5.50485e-07	0.00705116		DIAPH2	0.0569651	1.94605e-13	2.49173e-09
RP11-85O21.2	-0.0673643	6.27849e-07	0.00804024		E2F3	0.0677558	5.21248e-07	0.00667667		ZNF765	0.0568078	6.21923e-09	7.9631e-05
BAMBI	-0.0677144	7.76736e-12	9.94689e-08		METTL17	0.0677026	4.51846e-07	0.0057877		DLX2	0.0566548	1.21245e-17	1.55242e-13
FAM195A	-0.0682166	1.74038e-07	0.00222873		KIAA2013	0.0675752	1.15835e-09	1.48374e-05		RP11-297N6.4	0.056567	1.8155e-09	2.32457e-05
GNG7	-0.0685434	8.15583e-10	1.04444e-05		POC1A	0.0673086	1.16715e-12	1.495e-08		FAM73A	0.0565482	6.77637e-07	0.00867647
CADPS	-0.0686247	1.86378e-09	2.38675e-05		FAM13B	0.0672838	6.92916e-09	8.87556e-05		PLPPR4	0.0565362	1.80709e-08	0.00023138
DMRT3	-0.0691527	6.00785e-08	0.000769366		CRB2	0.0671949	2.8472e-07	0.00364698		CDKL3	0.0564165	5.36876e-07	0.00687416
CYBA	-0.0701445	1.58392e-07	0.00202837		SEMA5B	0.0671727	2.00564e-11	2.56903e-07		EVI5	0.056349	6.44164e-07	0.00824787
ZNF253	-0.0701492	8.55736e-11	1.09586e-06		MMS22L	0.0671597	4.32824e-08	0.000554405		BCORL1	0.0562579	9.18425e-08	0.00117595
KDM5D	-0.0705019	3.77987e-27	4.84051e-23		GPR108	0.0671231	6.72664e-08	0.000861615		SFI1	0.0559482	1.10483e-09	1.41462e-05
CRYGD	-0.0707674	2.49243e-19	3.19181e-15		MURC	0.0671145	1.69299e-07	0.00216855		DUSP10	0.0559208	3.55948e-11	4.55756e-07
TPD52L1	-0.0714669	1.2184e-13	1.56029e-09		AC159540.1	0.0669643	1.62404e-11	2.08023e-07		NBPF9	0.0559066	1.87068e-15	2.39522e-11
BTBD6	-0.0717292	8.11712e-18	1.03948e-13		MED16	0.0669555	6.78202e-09	8.68709e-05		LINC00511	0.055888	6.45677e-10	8.26725e-06
CDON	-0.0717361	1.96496e-08	0.000251633		RP11-372K14.2	0.0669247	3.58196e-12	4.58813e-08		PARD3B	0.0558359	8.91009e-11	1.14085e-06
NCAN	-0.0720473	3.10018e-07	0.00397009		TMED7	0.0667723	6.69394e-07	0.00857426		CIART	0.0558333	3.7462e-09	4.79663e-05
DYX1C1	-0.072489	1.26547e-08	0.000162056		USP13	0.0667559	7.79654e-08	0.000998659		SIRPA	0.0557316	3.58908e-13	4.59546e-09
BEX5	-0.0733783	8.09653e-11	1.03684e-06		MPHOSPH9	0.0667524	7.11258e-09	9.11051e-05		SLC25A28	0.0556917	1.0683e-08	0.000136785
PIGM	-0.0735559	2.52921e-09	3.23891e-05		AMFR	0.0667157	1.393e-10	1.78429e-06		PGAM5	0.055678	2.72198e-07	0.00348522
AGPAT2	-0.0739901	1.09184e-08	0.000139821		KIF21B	0.0667151	3.19482e-07	0.00409225		RPP21	0.0555166	4.97524e-07	0.0063703
MGP	-0.0743595	6.54469e-22	8.38113e-18		NEDD1	0.0666846	4.0531e-08	0.000519162		RP11-983P16.4	0.055499	7.5119e-11	9.61824e-07
SRR	-0.074525	6.91154e-09	8.85091e-05		PITPNC1	0.0666784	5.48144e-07	0.00702117		PCDHB14	0.0554214	2.45246e-07	0.00314013
LRRIQ1	-0.0750567	3.44386e-07	0.0044102		TNPO2	0.0666727	4.47373e-07	0.00573039		BCYRN1	0.0553353	5.40516e-12	6.92077e-08
RP11-798G7.6	-0.0752942	4.96617e-19	6.35967e-15		TFCP2	0.0666558	5.50439e-09	7.05057e-05		ANKHD1	0.0552691	1.92062e-07	0.00245917
TMEM80	-0.0760392	6.08032e-09	7.78646e-05		CLP1	0.0666293	1.64004e-10	2.10073e-06		ZNF548	0.0552325	5.91616e-08	0.000757505
LINC00982	-0.0761776	6.9424e-11	8.89044e-07		LRP11	0.0665005	3.89892e-13	4.99412e-09		TYW5	0.0550294	2.59884e-07	0.00332755
COMMD5	-0.0762	5.61594e-08	0.000719177		DIAPH1	0.066499	2.64029e-09	3.38195e-05		FLNB	0.0549278	2.71744e-08	0.000347941
LINC01560	-0.0764138	2.38373e-08	0.00030526		GTF2IRD1	0.0664884	1.71384e-07	0.00219526		ATXN1L	0.054712	3.84976e-08	0.000492923
FAM89A	-0.0767061	8.68471e-12	1.11216e-07		NAMPT	0.0664232	1.41533e-07	0.0018129		CTPS2	0.0546561	3.1368e-08	0.000401636
GPATCH4	-0.0768031	1.7093e-08	0.000218893		ARL13B	0.0662981	1.60405e-07	0.00205462		ADGRB1	0.0545602	9.52004e-08	0.00121895
TIGAR	-0.0768257	1.11687e-10	1.43026e-06		ANKRD36B	0.0662872	1.59081e-07	0.00203766		ZNF273	0.0542447	6.35937e-08	0.000814254
FAM207A	-0.07733	3.97017e-08	0.00050842		MXD1	0.0662814	6.95248e-15	8.90543e-11		SPIDR	0.0541306	2.74317e-09	3.51236e-05
TRIM36	-0.0777645	6.74581e-07	0.00863868		RC3H1	0.0661099	1.69836e-08	0.000217543		RP11-69E11.4	0.0540204	1.06661e-18	1.36569e-14
RFNG	-0.0781375	8.07267e-09	0.000103379		PLA2G6	0.0660359	1.15902e-13	1.48458e-09		INPP1	0.0539828	1.11811e-11	1.43163e-07
RNASEH1-AS1	-0.0783353	1.91008e-07	0.00244605		TTF2	0.0660121	8.29368e-09	0.000106234		MAFF	0.0537554	8.87946e-10	1.13693e-05
EXOSC3	-0.0786705	9.79139e-08	0.00125389		ZNF570	0.0659887	5.82724e-08	0.000746411		HARS2	0.0536384	7.30567e-07	0.00935418
GPC3	-0.078786	3.6292e-11	4.64756e-07		ARHGAP33	0.0659874	2.4554e-09	3.14512e-05		RASSF4	0.053273	4.28122e-07	0.00548167
GPCPD1	-0.0790756	7.63291e-12	9.7747e-08		COPG2	0.065979	3.59071e-07	0.00459934		KLF11	0.0531827	4.91054e-07	0.00628746
NAV1	-0.0790979	3.18581e-09	4.07974e-05		CDKL5	0.0658629	8.93386e-10	1.14434e-05		TAF1C	0.0531517	4.08659e-10	5.23247e-06
KIF3B	-0.0790984	2.30801e-12	2.95563e-08		HSPA13	0.0658301	7.87724e-08	0.001009		PVR	0.0530919	1.82867e-08	0.000234143
CLIC4	-0.0792819	1.0717e-07	0.00137242		FBXL20	0.0657249	3.97435e-07	0.00509074		KIAA0513	0.0530238	3.26861e-07	0.00418513
DAB1	-0.0794713	1.29224e-10	1.65484e-06		RASSF2	0.0657021	6.57763e-08	0.000842528		RNF152	0.052726	1.73291e-11	2.21882e-07
DESI1	-0.0801515	1.18698e-11	1.52004e-07		PCDHB16	0.0655889	9.37286e-18	1.20057e-13		PRUNE	0.0526859	6.45038e-07	0.00825907
UTY	-0.080448	5.63993e-30	7.2225e-26		TCF20	0.0655744	5.65541e-10	7.24402e-06		NGEF	0.0526562	1.16337e-08	0.000148958
RPL15	-0.0808496	1.1945e-07	0.00152968		DLX5	0.0655195	3.80968e-18	4.87981e-14		RNF180	0.0526359	2.53528e-07	0.00324618
SSX2IP	-0.0810857	2.7464e-09	3.51704e-05		WSCD1	0.065451	1.6393e-10	2.09978e-06		GALC	0.0526245	4.05569e-08	0.000519291
COL3A1	-0.0811375	4.69141e-26	6.00782e-22		SLC35A2	0.0653763	1.01039e-10	1.29421e-06		AKAP10	0.0526209	9.05516e-08	0.00115942
PLIN5	-0.0812745	3.29359e-16	4.21777e-12		ARHGEF10	0.0651462	1.54448e-08	0.000197833		NACA2	0.0525747	2.0489e-09	2.62341e-05
UACA	-0.0824557	3.10166e-07	0.00397198		MAMLD1	0.0650675	7.46012e-14	9.55567e-10		CACTIN	0.0523265	4.42429e-07	0.00566486
TP53I3	-0.0854479	2.99777e-11	3.83895e-07		GPAT4	0.0650486	1.67451e-07	0.00214487		RP11-61J19.5	0.0522149	1.4107e-09	1.80626e-05
TSPAN4	-0.08574	7.15817e-11	9.16675e-07		GTF3C5	0.0650436	5.43546e-07	0.00696228		VSTM2B	0.0521877	3.7183e-07	0.00476091
TLN2	-0.0864699	1.82891e-07	0.0023421		WNT7A	0.0649393	3.71145e-15	4.754e-11		CDH12	0.0520229	1.13119e-14	1.44838e-10
RPS20	-0.0872172	8.04296e-10	1.02998e-05		SRC	0.0649346	1.9152e-10	2.45318e-06		AGAP6	0.0520156	1.80241e-08	0.000230781
ABHD14A	-0.0890644	1.27602e-07	0.00163407		KIAA1549	0.0648008	3.00408e-07	0.00384793		VLDLR-AS1	0.0518907	6.93815e-08	0.000888361
EMG1	-0.0895221	4.90806e-10	6.28526e-06		BRF2	0.0646061	2.95715e-08	0.000378781		PYROXD1	0.0518848	1.15784e-07	0.0014825
RPL5	-0.0896219	1.57837e-08	0.000202126		ARHGAP11A	0.0646036	3.09207e-10	3.96063e-06		CCDC64	0.0518626	1.89514e-07	0.00242654
PIGC	-0.0897605	1.19107e-08	0.000152528		SH3PXD2A	0.0645859	1.13011e-09	1.44756e-05		GPC4	0.0516259	1.50288e-10	1.92428e-06
OXCT1	-0.0901066	1.12097e-08	0.000143552		FZR1	0.0645748	1.72224e-08	0.000220602		CEBPZOS	0.0516036	6.13307e-15	7.85278e-11
ZNF771	-0.0903884	2.22806e-10	2.85325e-06		RALGAPA2	0.0644938	6.08664e-07	0.00779638		SLC35B3	0.0514531	2.95509e-07	0.0037837
RPL9	-0.0905856	7.70182e-09	9.86296e-05		PANK1	0.0644667	1.26564e-10	1.62116e-06		HLA-DMA	0.0513624	1.99976e-16	2.5605e-12
RPL4	-0.0905909	7.12327e-07	0.00912206		FLOT2	0.0644529	8.94962e-08	0.00114636		LINC00936	0.0512329	3.31647e-08	0.000424641
HNRNPC	-0.0909775	6.80779e-07	0.00871806		WDR59	0.06426	2.40427e-08	0.000307963		ZNF703	0.0512314	6.88785e-07	0.00881921
SERPING1	-0.0925124	3.30628e-10	4.23403e-06		PLCH2	0.0641541	4.45516e-08	0.000570661		HPS3	0.0512209	5.59301e-09	7.1613e-05
KIAA0232	-0.0927287	6.13358e-08	0.000785466		ZNF140	0.0640665	1.49775e-07	0.00191847		KCNN2	0.0509333	2.36077e-11	3.02274e-07
NEUROD6	-0.09354	2.2501e-13	2.88148e-09		DAGLB	0.0639462	1.04551e-09	1.3392e-05		C19orf66	0.0508578	5.62087e-07	0.00719697
EEF1D	-0.0935901	3.31827e-07	0.00424937		FUZ	0.0638782	3.61126e-07	0.00462566		KCNMA1	0.0508578	3.17696e-08	0.000406778
TCEAL5	-0.0938413	5.70281e-15	7.30301e-11		ZNF692	0.063731	3.13535e-08	0.000401607		MGAT4A	0.050762	1.13344e-09	1.45126e-05
CCDC58	-0.0949335	3.08263e-10	3.94762e-06		DEPDC1B	0.0635649	2.9699e-07	0.00380415		SEMA4A	0.0507609	1.04035e-07	0.00133207
NSMCE1	-0.0952354	4.75764e-07	0.00609264		TMEM159	0.0635331	4.42198e-09	5.66411e-05		CNTN4	0.0505501	3.48603e-18	4.46352e-14
EDF1	-0.0955375	5.83018e-08	0.000746613		PNP	0.0634977	1.18685e-09	1.52023e-05		RPPH1	0.0502866	8.47549e-12	1.0852e-07
KIAA1524	-0.0956166	5.45584e-08	0.000698674		ALKBH3	0.0634234	1.95869e-14	2.50889e-10		TAF1A	0.0502769	5.25322e-07	0.00672623
ECEL1	-0.0960365	8.66326e-13	1.10942e-08		ZBTB2	0.0634194	3.80962e-08	0.000487974		AP001372.2	0.0502616	9.77872e-08	0.00125207
RPL18A	-0.0964291	3.4414e-08	0.000440706		CDK9	0.0633838	4.43749e-07	0.00568397		CH17-189H20.1	0.0502332	6.56726e-10	8.40872e-06
AC011043.1	-0.0965466	8.01164e-13	1.02597e-08		RP11-544A12.8	0.0633629	1.68684e-07	0.00216068		KIRREL3	0.0500679	9.46409e-16	1.21178e-11
PDLIM2	-0.0966941	1.14392e-07	0.0014649		TMEM129	0.0633593	5.46625e-08	0.000700172		LRRC26	0.0499525	5.20757e-07	0.00666778
RPL19	-0.0979245	8.03842e-10	1.0294e-05		ARRDC4	0.0632593	3.54371e-12	4.53914e-08		FAM19A2	0.0498465	3.99592e-08	0.000511638
TRIB3	-0.0982686	1.25948e-10	1.61288e-06		MRPS17	0.0631736	3.0904e-07	0.00395849		PCDHB16	0.0496434	7.18663e-11	9.20176e-07
LIFR	-0.098882	9.99965e-08	0.00128055		GGT7	0.0631029	2.06962e-07	0.00265098		RABEP2	0.0495755	2.6089e-07	0.00334044
ATP5L	-0.0993907	6.97676e-09	8.93444e-05		ADIPOR2	0.0630982	1.20027e-07	0.00153742		KLHL15	0.049509	3.45397e-11	4.42246e-07
UROD	-0.0998113	7.24595e-07	0.00927916		ZNF689	0.0629787	1.89311e-07	0.00242488		MEPCE	0.049431	3.84659e-07	0.00492517
TMEM179B	-0.0999203	1.27789e-08	0.000163647		FUT8	0.0628697	2.38976e-07	0.00306104		GFRA2	0.0493835	1.19494e-08	0.000153
TTF1	-0.100394	2.83406e-07	0.0036293		B4GALT4	0.0628478	8.79733e-10	1.12685e-05		PDE1B	0.0492474	2.15685e-13	2.76163e-09
FHOD3	-0.101255	4.98261e-09	6.38074e-05		POU2F2	0.0627274	4.10785e-07	0.00526175		CAT	0.0491232	8.66443e-23	1.10939e-18
OAF	-0.101553	2.65327e-08	0.000339778		RP11-129M6.1	0.0626565	3.30097e-19	4.22821e-15		PRICKLE2-AS1	0.0490816	5.01108e-13	6.41618e-09
ZNF770	-0.101947	3.48318e-07	0.00446057		RORB	0.0625673	1.60559e-10	2.0566e-06		PRC1	0.0490119	8.02102e-08	0.00102701
MIMT1	-0.102736	2.21541e-39	2.83706e-35		RRP36	0.0625512	6.21815e-08	0.000796483		SEMA4B	0.0489577	4.03399e-07	0.00516512
DRAXIN	-0.103002	1.33914e-10	1.7149e-06		SCAI	0.0624651	7.34449e-08	0.000940756		CTD-2162K18.4	0.0489495	8.17487e-20	1.04671e-15
NFIC	-0.103196	7.16889e-11	9.18048e-07		TTYH3	0.0623903	3.22919e-07	0.00413627		ADORA2A-AS1	0.0486297	1.23106e-08	0.000157625
ZADH2	-0.103253	1.23807e-08	0.000158547		NAIP	0.0623066	3.05117e-14	3.90825e-10		GABRA3	0.0486171	1.32435e-07	0.0016957
BTBD17	-0.103913	8.36016e-09	0.00010706		MPP5	0.0622634	1.08052e-07	0.00138404		RP11-481J2.4	0.0484665	7.7651e-08	0.000994243
RPF2	-0.104344	2.98347e-07	0.00382064		NUP153	0.0621816	5.13837e-09	6.58174e-05		ADGRV1	0.0482687	3.57762e-18	4.58078e-14
UROS	-0.104432	2.29522e-08	0.000293925		NCSTN	0.0620884	4.17538e-07	0.00534824		DND1	0.0482199	8.7333e-18	1.11821e-13
AGO1	-0.104949	1.75958e-08	0.000225332		FANCD2	0.0620705	3.013e-11	3.85935e-07		DGKH	0.0481147	4.55586e-08	0.000583332
GNG12	-0.105656	1.46274e-13	1.87319e-09		TMCC1	0.0619522	3.56973e-07	0.00457247		ZFP28	0.0480191	1.5085e-08	0.000193148
MT1X	-0.105751	1.26472e-21	1.6196e-17		CLCN6	0.0618721	8.94161e-10	1.14533e-05		PLCH1	0.0480003	1.06273e-07	0.00136072
UCHL3	-0.106003	2.78647e-09	3.56835e-05		ARL17B	0.0616719	3.52303e-09	4.51265e-05		ZNF699	0.0479803	4.1411e-09	5.30226e-05
NDRG2	-0.106159	8.80085e-08	0.00112704		UBR3	0.0614238	6.1835e-07	0.00792044		MCM4	0.0479694	6.38552e-07	0.00817602
PRDM16	-0.106181	8.95821e-14	1.14719e-09		ZNF558	0.0614177	1.24962e-22	1.60064e-18		CROCC	0.0478309	1.25249e-13	1.60368e-09
HOMER3	-0.106504	2.3834e-11	3.05218e-07		AVIL	0.0613992	1.42703e-09	1.82789e-05		RAP2C	0.0477307	4.23026e-07	0.00541642
KHDRBS1	-0.106702	2.57069e-07	0.00329203		OAT	0.0613982	2.78317e-07	0.00356497		PRR7-AS1	0.0477205	6.71939e-12	8.60351e-08
NUDT14	-0.107271	5.83615e-17	7.47378e-13		SKIDA1	0.0613936	2.31423e-07	0.0029643		FZD1	0.0476626	3.25293e-10	4.16505e-06
NCBP2-AS2	-0.10747	6.22497e-07	0.00797169		CHFR	0.0613349	2.54535e-08	0.000326034		ZBTB8B	0.0474759	1.24896e-11	1.59917e-07
EEF1B2	-0.108177	2.23874e-07	0.00286693		PHACTR3	0.0613292	5.2219e-07	0.00668873		ARHGEF11	0.0474573	3.98382e-07	0.00510088
TAF12	-0.108471	1.24783e-08	0.000159798		AKR1C1	0.0612634	8.96925e-08	0.00114887		FAM213B	0.0472955	3.07348e-07	0.00393528
THTPA	-0.109027	7.54649e-13	9.66404e-09		RP13-942N8.1	0.0612248	6.5418e-10	8.3794e-06		NHS	0.0468064	2.37039e-11	3.03504e-07
COQ5	-0.10959	1.5586e-07	0.00199594		CECR1	0.0612175	3.49295e-14	4.47411e-10		ZNF550	0.0467044	5.55152e-07	0.00710817
RMI2	-0.109678	6.09937e-07	0.00781086		ANKRD49	0.0611415	6.37805e-08	0.000816964		KCNK3	0.046696	3.00759e-07	0.00385092
IGF2BP3	-0.11058	1.87512e-07	0.00240128		TAB2	0.0611282	7.4726e-07	0.00957165		ARHGAP8	0.046356	4.3637e-08	0.000558728
NQO2	-0.110693	1.79567e-11	2.29954e-07		LRR1	0.0609247	5.09892e-07	0.0065312		MAD2L1	0.0462951	2.65188e-07	0.00339547
CCT7	-0.111739	2.39975e-07	0.00307312		TK1	0.0608484	2.86548e-10	3.67039e-06		CFAP53	0.0460949	5.10942e-09	6.54211e-05
MXRA8	-0.112176	5.12982e-38	6.56925e-34		RAB1B	0.0607852	4.1849e-08	0.000536043		CDC7	0.046077	3.3018e-07	0.00422763
HDAC1	-0.112211	2.30837e-07	0.0029561		LMF2	0.060687	2.07363e-10	2.65611e-06		GABRB1	0.0460193	4.77266e-07	0.00611091
ARPC4	-0.112572	9.2845e-08	0.00118897		MNT	0.0606382	3.03361e-07	0.00388576		AMFR	0.0457388	1.39196e-07	0.00178227
MRPS10	-0.113098	3.88267e-07	0.00497215		EPHA7	0.0605885	9.96731e-10	1.27671e-05		FEZF1	0.0454681	1.34897e-08	0.000172723
ATP5A1	-0.113115	1.84354e-09	2.36084e-05		GPR137C	0.0603085	5.6078e-09	7.18303e-05		EPHA10	0.0450232	6.30194e-10	8.06901e-06
PSMB5	-0.113618	5.63095e-08	0.000721099		KLHL5	0.0600461	9.06929e-09	0.000116169		ZNF350	0.0449839	9.1311e-18	1.16915e-13
NME7	-0.11418	4.4999e-08	0.000576257		MED26	0.0599261	1.7405e-08	0.00022294		GPRIN3	0.0449394	4.51676e-09	5.78326e-05
MRPL12	-0.114235	6.80246e-07	0.00871123		BAG3	0.0598827	4.76284e-09	6.10072e-05		GABRA5	0.0446322	6.13701e-09	7.85783e-05
EIF3H	-0.114591	1.13285e-07	0.00145073		DIAPH2	0.059823	1.15115e-13	1.47451e-09		CCNF	0.0444825	4.58388e-07	0.0058692
CTSC	-0.114594	4.76692e-11	6.10452e-07		NR2E1	0.0597688	4.13057e-08	0.000529084		TPRG1L	0.0444553	3.07532e-07	0.00393764
TBCC	-0.114613	2.90571e-10	3.72105e-06		IQSEC1	0.0597399	2.59831e-09	3.32818e-05		POU6F1	0.0443991	2.0855e-07	0.00267027
LINC00667	-0.114891	2.13623e-12	2.73566e-08		CC2D1A	0.0596645	2.39132e-07	0.00306304		PNCK	0.0443749	3.54216e-07	0.00453538
FTSJ3	-0.115095	1.40335e-15	1.79713e-11		POLA1	0.0595982	8.6732e-13	1.11095e-08		GCFC2	0.0441095	4.89426e-08	0.000626661
ZCRB1	-0.115369	2.60488e-07	0.00333581		ZNF350	0.0595733	2.42894e-24	3.11123e-20		HYPK	0.0439812	3.54972e-07	0.00454507
DAZAP1	-0.115541	7.44473e-07	0.00953372		NBPF9	0.0594976	8.39838e-16	1.07575e-11		USP20	0.0437067	1.41482e-07	0.00181153
SLC38A1	-0.115782	2.67838e-10	3.42993e-06		ARHGAP11B	0.0594455	3.08956e-10	3.95742e-06		ABHD3	0.0436312	9.38397e-09	0.000120152
EIF3K	-0.115915	3.06662e-08	0.000392711		C16orf58	0.059431	3.31616e-10	4.24767e-06		RP4-671O14.7	0.0434022	2.17321e-08	0.000278258
COX4I1	-0.115966	1.31669e-10	1.68616e-06		CAPN7	0.0594255	4.39687e-07	0.00563194		TIPARP	0.0431719	4.31235e-07	0.00552153
FAM13C	-0.116012	5.30556e-18	6.7943e-14		RAI1	0.059393	2.66696e-09	3.41611e-05		PPP2R5A	0.0431498	1.57841e-07	0.00202099
HNRNPK	-0.116117	4.72664e-08	0.000605293		AHDC1	0.0593895	3.80923e-07	0.00487924		CDH18	0.0430963	5.02881e-08	0.000643889
SPA17	-0.11641	1.86092e-10	2.3831e-06		TMEM200C	0.0593833	4.35959e-09	5.5842e-05		RAI2	0.0429073	3.10705e-10	3.97827e-06
CPSF3	-0.116484	3.01857e-07	0.00386558		FANCG	0.0593575	2.76668e-09	3.54383e-05		NEURL1	0.0429049	8.6661e-09	0.000110961
MZT2B	-0.116506	5.98271e-08	0.000766146		PLEKHF2	0.0592486	1.98434e-08	0.000254174		LINC00869	0.042512	3.5603e-07	0.00455861
C21orf59	-0.116599	9.92801e-09	0.000127138		ST3GAL1	0.0592457	1.22233e-08	0.000156568		CDK6	0.0421822	2.85856e-08	0.00036601
SAAL1	-0.116895	1.6717e-12	2.14078e-08		CDCA2	0.058956	8.98344e-08	0.00115069		CDC25B	0.0421671	1.46474e-07	0.00187545
C11orf49	-0.117284	2.11654e-07	0.00271045		FKBP11	0.0589275	2.177e-07	0.00278852		DHX34	0.0419404	5.99376e-08	0.000767441
ZSWIM7	-0.117374	2.46236e-07	0.0031533		SOWAHC	0.0588413	6.62114e-07	0.00848102		C16orf59	0.0418285	6.00062e-07	0.00768319
HRAS	-0.117585	3.41575e-09	4.37421e-05		CASC9	0.0587528	9.53798e-24	1.22172e-19		SEMA5B	0.0417884	5.72332e-07	0.00732814
DIXDC1	-0.118046	1.62068e-11	2.07544e-07		MICAL3	0.0586974	2.78077e-11	3.56189e-07		AMOT	0.0416952	1.07609e-10	1.37783e-06
SDAD1	-0.11811	3.04194e-09	3.89551e-05		SFMBT1	0.0586856	4.72288e-08	0.000604954		KLHL13	0.0414564	9.74172e-09	0.000124733
MICU2	-0.118197	7.65026e-08	0.000979693		RP11-395A13.2	0.0586518	1.67934e-07	0.00215107		NUAK2	0.0412792	1.99062e-08	0.000254878
ILF3	-0.118203	5.36955e-07	0.00687625		PEX6	0.0586228	4.08082e-08	0.000522712		NRXN3	0.0412587	2.4209e-11	3.09972e-07
NRG1	-0.118526	7.21941e-18	9.24518e-14		CACHD1	0.0584903	2.87377e-07	0.00368101		ALCAM	0.0407818	9.57548e-12	1.22604e-07
CNBP	-0.118537	4.52135e-09	5.79005e-05		C17orf75	0.0583077	1.26933e-07	0.00162588		DUSP6	0.040173	2.6572e-09	3.40228e-05
CRIP2	-0.119615	3.61658e-08	0.00046314		FOXRED2	0.0582466	1.93011e-11	2.47227e-07		TMEM213	0.0399437	2.72521e-09	3.48936e-05
APOA1BP	-0.119649	1.15649e-08	0.000148101		NT5M	0.0582319	7.29323e-07	0.0093419		CDH8	0.0399436	1.64171e-12	2.10204e-08
PSMG1	-0.119895	5.66023e-08	0.000724849		SPATA13	0.0581875	5.0617e-07	0.00648354		POLE	0.0397608	1.37676e-09	1.76281e-05
ATP5G3	-0.120383	1.64736e-08	0.000210961		C17orf49	0.0581483	1.54597e-07	0.00198023		LRP5L	0.0395732	6.79135e-08	0.000869564
TAF15	-0.121802	2.05526e-08	0.000263197		TAB1	0.0580834	6.21949e-08	0.000796655		USP21	0.0394795	6.76441e-07	0.00866115
SERTAD4	-0.121887	8.24944e-21	1.05642e-16		ABCA3	0.0580805	4.97391e-11	6.37108e-07		C10orf95	0.039425	8.89048e-11	1.13834e-06
PSMB1	-0.122004	5.38969e-08	0.000690204		ADRA2A	0.058049	1.0317e-11	1.3215e-07		SYCP2L	0.0392399	7.88535e-08	0.00100964
MCTS1	-0.122242	1.56948e-07	0.00200988		CHST15	0.0579877	2.77447e-10	3.55381e-06		ANO5	0.0389654	8.08062e-08	0.00103464
CNTLN	-0.122388	5.83775e-07	0.00747582		ZBTB10	0.0578795	6.8377e-07	0.00875841		ADAMTS4	0.0386722	9.52301e-09	0.000121933
C6orf203	-0.123143	6.36858e-11	8.15561e-07		NACA2	0.0578732	5.67419e-11	7.26808e-07		PI4K2A	0.0383288	7.49484e-07	0.00959639
MRPS33	-0.123546	1.25827e-07	0.00161134		RNASEK	0.0578301	3.31502e-08	0.000424621		ASB13	0.0381811	7.32632e-07	0.00938062
NDUFS6	-0.123585	1.84284e-07	0.00235994		ZNF276	0.0578254	1.21432e-08	0.000155543		C3orf70	0.0381767	4.06265e-07	0.00520182
RPS7	-0.12359	2.35316e-15	3.01346e-11		OTUD4	0.0576637	7.48422e-07	0.00958653		BTBD8	0.0381316	1.43892e-08	0.00018424
COPS5	-0.124161	1.06683e-07	0.00136619		FAM214B	0.0575995	1.80405e-07	0.00231081		PIP5KL1	0.0380165	4.66256e-07	0.00596994
GPANK1	-0.124217	3.69768e-09	4.73525e-05		PAPD5	0.0575859	5.71688e-07	0.00732275		ZNF202	0.0379487	6.89552e-07	0.00882902
ZNF280D	-0.124489	3.19849e-28	4.09598e-24		XAB2	0.0575609	6.14272e-08	0.000786821		ZNF404	0.0378882	1.67826e-09	2.14885e-05
CRABP2	-0.12457	8.41528e-11	1.07766e-06		MFSD2A	0.0575229	5.53019e-07	0.00708362		BDNF-AS	0.0378528	2.43325e-08	0.000311553
TXNL4A	-0.124776	3.96485e-07	0.00507739		GRIN2B	0.0574588	1.47883e-12	1.89424e-08		RP11-347P5.1	0.0378389	7.74994e-14	9.92302e-10
PHF6	-0.124898	1.3877e-07	0.00177709		FAM124A	0.0573496	2.00462e-08	0.000256772		LILRB3	0.0375124	4.25873e-12	5.45288e-08
UBE2D3	-0.124975	2.3609e-08	0.000302337		TBK1	0.0572668	2.41953e-07	0.00309918		PRRG2	0.0371712	1.54035e-07	0.00197226
PCBP2	-0.124998	3.64203e-08	0.000466398		LDB2	0.0572329	1.61981e-09	2.07482e-05		KIRREL	0.0371276	9.40752e-09	0.000120454
GRIP2	-0.125219	1.58545e-12	2.03033e-08		PLP2	0.057173	1.94638e-07	0.00249311		IL1RAPL1	0.0367376	1.41838e-07	0.0018161
ZNF75A	-0.12535	1.55318e-11	1.989e-07		SOX6	0.0571551	2.13928e-08	0.000274021		DLX5	0.0367026	1.50302e-08	0.000192447
PDCD2	-0.126288	6.90414e-08	0.000884144		FANCI	0.0570503	7.48822e-08	0.000959166		MYL5	0.0365327	1.00618e-08	0.000128831
ANKRD11	-0.126294	6.96136e-07	0.00891472		CASC5	0.0569676	7.78566e-09	9.97265e-05		CITED4	0.03635	1.08961e-09	1.39514e-05
NFIX	-0.126666	1.68169e-22	2.15357e-18		CEP295	0.0569557	5.89574e-07	0.00755186		ATR	0.0363054	4.85018e-07	0.00621018
PRIM1	-0.126782	1.5094e-09	1.93293e-05		DTL	0.0568924	1.73772e-10	2.22585e-06		SLC29A2	0.0361652	9.11539e-09	0.000116714
OSTC	-0.126849	4.63049e-07	0.00592981		MYNN	0.0568663	2.06536e-07	0.00264552		CCDC88B	0.035996	7.29545e-08	0.00093411
NAA10	-0.127163	6.12711e-08	0.000784638		RPRD1B	0.0567972	3.52826e-08	0.000451935		DANT2	0.0356181	1.1317e-08	0.000144903
DHRSX	-0.12738	9.12529e-12	1.16858e-07		ULK2	0.0567741	1.95942e-07	0.00250983		LRRC37A2	0.0354974	1.1017e-07	0.00141061
RGS10	-0.128741	1.57958e-30	2.02281e-26		SLC35A1	0.0567449	2.54557e-07	0.00326062		KCNF1	0.035484	1.22292e-07	0.00156583
PSMB3	-0.128765	2.819e-07	0.00361001		ZNF724P	0.0567355	3.49256e-11	4.47362e-07		PLXNC1	0.0351648	1.06767e-07	0.00136705
NDUFB3	-0.129236	2.5056e-07	0.00320867		KTI12	0.0567236	3.46951e-08	0.00044441		VWCE	0.0349162	2.63013e-07	0.00336761
ATF5	-0.129314	3.61257e-13	4.62625e-09		ZNF568	0.0567185	9.86159e-12	1.26317e-07		TUFT1	0.0348772	4.01144e-07	0.00513625
RPL3	-0.129703	5.2083e-15	6.66975e-11		ADAMTS6	0.0566656	3.88811e-08	0.000498028		RP11-159D12.5	0.0348157	1.16261e-07	0.00148861
C1orf61	-0.129784	4.0791e-08	0.00052237		IGSF9	0.0566235	3.51069e-07	0.00449685		KIAA2012	0.0344513	2.14743e-08	0.000274957
SRPK1	-0.129869	4.87121e-08	0.000623807		LRRC7	0.0565866	5.91385e-07	0.00757505		SST	0.0340951	3.34377e-10	4.28137e-06
MRPL19	-0.130449	4.61513e-07	0.00591014		FAM131B	0.0564247	6.85283e-10	8.77778e-06		SYTL4	0.0338222	5.26188e-07	0.00673731
N4BP2L2	-0.130548	3.67102e-07	0.00470111		DDIT3	0.056256	1.04934e-08	0.000134409		MYH7B	0.033798	3.54053e-07	0.0045333
CAMTA1	-0.130889	4.36198e-08	0.000558595		DIAPH3	0.0560932	8.27646e-09	0.000106013		RP11-413H22.2	0.0335988	1.37821e-07	0.00176466
MAT2A	-0.130926	8.25124e-09	0.000105665		SMPD4	0.056079	2.10754e-08	0.000269955		GRHL1	0.033575	4.33918e-07	0.00555588
PABPN1	-0.13093	2.75045e-07	0.00352223		SLC11A2	0.0559491	1.12751e-07	0.00144423		LINC00847	0.0334478	4.53447e-10	5.80594e-06
IARS	-0.130941	1.65724e-08	0.000212226		KANSL1-AS1	0.055796	1.27903e-14	1.63831e-10		NR1D2	0.0334378	1.14037e-07	0.00146013
GAMT	-0.13112	2.34807e-08	0.000300694		KIF20A	0.0556962	1.7944e-08	0.000229844		ZNF283	0.0334093	2.81881e-07	0.00360921
EMC6	-0.131321	1.04386e-07	0.00133676		BAG4	0.0555144	8.87785e-08	0.00113716		RP11-276H19.2	0.0332851	9.01504e-12	1.15429e-07
CEBPG	-0.131416	4.0481e-12	5.18399e-08		SLITRK5	0.0554122	1.69887e-09	2.17608e-05		RP11-262H14.3	0.0330596	1.75054e-15	2.24139e-11
SUMO2	-0.131979	4.59129e-17	5.8796e-13		BUB1B	0.0554111	4.77488e-11	6.11614e-07		WFDC2	0.0327549	8.97316e-10	1.14892e-05
PSMD4	-0.132096	1.4754e-07	0.00188939		RAB40C	0.0554033	2.04816e-07	0.00262349		ETS2	0.0321967	3.08202e-07	0.00394622
SMARCA4	-0.13215	4.20759e-08	0.000538824		CDH23	0.0553614	1.32658e-09	1.69921e-05		PCSK4	0.032165	1.73615e-07	0.00222297
BUD31	-0.132313	4.77815e-07	0.0061189		NPAT	0.0552588	4.38808e-07	0.00562069		ZNF280C	0.0320525	4.54957e-07	0.00582527
TAF10	-0.132454	9.36815e-12	1.19968e-07		AMOTL1	0.0551915	2.57214e-07	0.00329465		SOCS1	0.0307504	4.71463e-08	0.000603661
MAGOH	-0.132761	1.26352e-07	0.00161806		LPAR4	0.0551431	3.12199e-10	3.99895e-06		TYW3	0.0307187	2.28065e-15	2.92014e-11
CNOT7	-0.133024	2.67222e-07	0.00342204		GGCX	0.0550733	3.94641e-07	0.00505495		APOC1	0.0306039	2.97743e-11	3.8123e-07
ATP2B1	-0.133224	2.32727e-08	0.00029803		ZNF263	0.0550594	7.51577e-08	0.000962695		LIN37	0.0304663	7.81797e-08	0.00100101
MAD2L2	-0.133866	8.48191e-08	0.00108619		OBSL1	0.0550229	2.67688e-07	0.00342881		ZNF585A	0.0303599	6.22e-07	0.00796408
CHD3	-0.133881	2.69328e-10	3.44902e-06		PI4KB	0.0549706	2.55482e-07	0.00327247		CECR1	0.0299373	3.35336e-07	0.00429364
RAB11FIP2	-0.133936	3.65927e-12	4.68606e-08		FUCA2	0.0549122	6.89867e-10	8.83651e-06		DLX6-AS1	0.0298781	2.6253e-08	0.000336143
EBNA1BP2	-0.134146	1.03099e-09	1.32028e-05		CADM2	0.0548926	1.73071e-10	2.21687e-06		RP11-796E2.4	0.0295554	1.41911e-07	0.00181703
GABPB1	-0.134157	2.13123e-08	0.000272926		RP11-553L6.5	0.0548616	1.91063e-08	0.000244733		LRP4-AS1	0.0293934	2.20994e-09	2.82961e-05
WDR34	-0.134443	4.39258e-09	5.62514e-05		MEN1	0.0548178	2.17291e-07	0.00278328		EIF2AK3	0.02903	5.65759e-07	0.00724398
LRRC3B	-0.134555	2.78855e-11	3.57102e-07		FAR1	0.0546652	7.66117e-07	0.00981319		CASC9	0.0284246	1.70421e-12	2.18207e-08
MAP1B	-0.1349	2.44896e-11	3.13613e-07		FANCA	0.0546606	4.86605e-08	0.000623292		ADM5	0.0281169	3.93919e-09	5.04374e-05
RCOR2	-0.134999	8.90766e-10	1.14071e-05		PFKFB3	0.0545283	1.59236e-07	0.00203965		RP11-277A4.4	0.0279862	3.16045e-07	0.00404664
TMEM158	-0.135037	4.85944e-19	6.223e-15		CROCC	0.0543876	5.54821e-13	7.1067e-09		ARAP3	0.0275653	3.41496e-08	0.000437251
MRPL37	-0.135334	1.37671e-09	1.76302e-05		PHC1	0.0543792	4.28371e-07	0.005487		RP1-78B3.1	0.027431	5.70888e-08	0.000730965
MYL6	-0.135351	4.71197e-07	0.00603415		KLHL15	0.0542856	8.30089e-16	1.06326e-11		CDH3	0.0273818	6.45456e-07	0.00826442
NMU	-0.135369	5.93279e-13	7.59753e-09		CYTH1	0.0542575	7.67197e-07	0.00982703		CTD-2008L17.2	0.0245516	1.29784e-10	1.66176e-06
AC004540.4	-0.135456	1.12055e-18	1.43497e-14		PHLPP1	0.0542259	7.46307e-07	0.00955945		RBMS1	0.024429	2.98255e-07	0.00381886
TIFA	-0.135894	7.3191e-13	9.37284e-09		MAP6D1	0.0541974	3.68091e-10	4.71487e-06		FAXDC2	0.0242453	5.90608e-07	0.00756215
NDC80	-0.135971	5.1828e-07	0.0066371		PHF19	0.0541632	2.88708e-07	0.00369807		PDE8B	0.0232633	1.36876e-07	0.00175256
PRPF19	-0.136142	1.63842e-11	2.09817e-07		XPO7	0.0541547	4.98872e-07	0.00639006		SGK223	0.0226415	3.56407e-07	0.00456344
SAP18	-0.136425	4.14251e-08	0.00053049		RNF112	0.0540785	1.07074e-08	0.000137151		CCDC150	0.0222977	2.0577e-07	0.00263468
HIST1H1D	-0.136551	4.43823e-32	5.6836e-28		MYO19	0.0540635	2.88273e-08	0.000369249		ZNF829	0.0208706	2.0577e-07	0.00263468
SNRPG	-0.136683	7.65693e-09	9.80546e-05		RNF180	0.0540098	2.52857e-08	0.000323884		DLX1	0.0202853	1.91901e-07	0.00245711
FAM204A	-0.136833	2.07223e-07	0.0026537		GK	0.0539542	1.25933e-10	1.61307e-06		PSTPIP2	0.0202251	1.58312e-07	0.00202703
CCDC90B	-0.136885	6.14396e-08	0.000786796		FAM57A	0.0539019	2.78145e-09	3.56276e-05		CRYZ	0.0185924	1.96783e-10	2.51961e-06
NAPRT	-0.137084	7.99125e-14	1.02336e-09		USP32	0.0538543	8.86927e-09	0.000113607		FHOD1	0.0154409	5.24874e-07	0.00672049
SUGT1	-0.137123	1.18034e-07	0.00151154		AC004951.6	0.0537796	2.13857e-08	0.00027393		AC098973.2	0.0144682	3.96414e-07	0.00507568
CHMP2A	-0.137341	1.08501e-07	0.00138946		FEZF1-AS1	0.053776	3.31001e-12	4.23979e-08		TXNRD2	-0.0304026	3.93314e-07	0.00503599
AASDHPPT	-0.137377	8.72871e-09	0.00011178		C21orf2	0.0536635	1.7532e-07	0.00224567		AFP	-0.0347218	4.3987e-08	0.000563209
KCNQ2	-0.137595	1.01485e-10	1.29962e-06		TWSG1	0.0536021	1.27457e-07	0.0016326		TTTY14	-0.0347691	1.795e-09	2.29832e-05
ATG10	-0.137633	2.8531e-21	3.65367e-17		GPR19	0.0535975	6.50831e-08	0.00083365		ZFY	-0.0361012	5.74747e-09	7.35906e-05
SMARCA5	-0.137727	2.45114e-07	0.00313894		VPRBP	0.053588	4.41148e-09	5.65067e-05		S100A11	-0.0384331	2.45952e-08	0.000314916
DDX46	-0.137803	4.05899e-07	0.00519794		SLC27A1	0.0534615	2.05379e-08	0.000263069		APOA2	-0.0411881	8.51994e-09	0.000109089
C6orf48	-0.138256	1.28329e-08	0.000164338		RNGTT	0.0533848	2.00667e-07	0.00257034		DCN	-0.0425455	1.06328e-07	0.00136142
PLIN2	-0.138277	1.81403e-13	2.32305e-09		C1orf198	0.0533461	2.23144e-07	0.00285826		APOA1	-0.0434144	3.38119e-07	0.00432927
MAPRE1	-0.138286	1.32641e-07	0.0016986		TMEM184B	0.0533187	1.40334e-07	0.00179753		IGF2	-0.043751	6.61971e-09	8.47588e-05
RALA	-0.138485	1.88125e-08	0.000240913		CDK17	0.0532865	3.80146e-08	0.000486928		IFITM3	-0.0460162	1.58885e-07	0.00203436
NDUFB2	-0.138491	7.26441e-09	9.30281e-05		PLCH1	0.0531234	8.32755e-10	1.06668e-05		RP11-120J1.1	-0.0494539	1.08931e-07	0.00139475
PSME1	-0.138712	4.70873e-07	0.00603		LAMB1	0.0531115	1.01656e-16	1.30211e-12		MFAP2	-0.054435	5.26768e-08	0.000674473
NDUFB10	-0.138831	1.45659e-09	1.86531e-05		SPATA5L1	0.0530283	1.95368e-07	0.00250247		TMEM54	-0.0547663	1.31638e-08	0.00016855
ACTR10	-0.139147	2.4208e-08	0.000310007		USPL1	0.0530132	2.9765e-08	0.00038126		LUM	-0.0563786	3.37045e-09	4.31552e-05
PIH1D1	-0.139302	4.24681e-08	0.000543846		BCORL1	0.0529289	2.30689e-11	2.95489e-07		LGALS1	-0.0575452	1.27577e-07	0.0016335
AK6	-0.139313	8.00507e-08	0.00102513		CDC7	0.0529171	1.71591e-09	2.19791e-05		UTY	-0.0579796	3.56525e-14	4.56494e-10
DACH1	-0.139535	2.41419e-07	0.00309161		ITPRIP	0.0529131	2.94973e-10	3.77831e-06		MIR210HG	-0.0589699	1.07763e-07	0.0013798
SNX2	-0.13956	4.78881e-08	0.000613255		C6orf136	0.052897	1.05835e-07	0.00135564		GSN	-0.0628533	1.30561e-08	0.000167171
CARS	-0.139622	1.41733e-15	1.81503e-11		PMS2	0.052828	1.2064e-07	0.00154527		SLC16A3	-0.0642809	1.06619e-08	0.000136515
PSMB7	-0.139777	5.39335e-08	0.000690672		TMEM39A	0.0527573	7.24255e-09	9.27698e-05		COL3A1	-0.0643562	1.78129e-12	2.28077e-08
SUB1	-0.139896	1.49797e-10	1.9183e-06		PIM2	0.0527033	5.59803e-10	7.17052e-06		TNS2	-0.0644651	5.11739e-07	0.0065523
EMC4	-0.139978	1.62953e-07	0.00208677		CNPY4	0.0526397	7.11217e-08	0.000910998		RP3-402G11.26	-0.0684495	1.98342e-10	2.53958e-06
C9orf16	-0.140077	3.18299e-08	0.000407613		HTRA1	0.0524813	1.61964e-07	0.0020746		PDLIM4	-0.068561	2.69417e-08	0.000344961
PSMD14	-0.140094	1.83544e-08	0.000235046		TAZ	0.0524783	4.18742e-07	0.00536366		ABTB1	-0.0724772	4.96306e-13	6.3547e-09
RPS27A	-0.140647	6.19071e-18	7.92783e-14		UBR7	0.0524134	1.44731e-07	0.00185386		NLGN4Y	-0.0733374	2.92177e-17	3.74103e-13
MYL6B	-0.140893	2.34924e-08	0.000300843		ZNF408	0.0523975	5.8642e-07	0.00751145		FAM212B	-0.0746898	8.48712e-08	0.00108669
UBE2V2	-0.141191	2.57562e-08	0.000329834		CHRDL1	0.0523639	7.75718e-10	9.93617e-06		MT1X	-0.0749515	5.15585e-13	6.60156e-09
RP11-706O15.5	-0.14131	1.62875e-55	2.08578e-51		SPAG5	0.0523183	7.09971e-09	9.09402e-05		ADA	-0.0783392	1.2763e-08	0.000163417
AURKAIP1	-0.141404	7.50227e-08	0.000960741		RAB30	0.0522999	5.74349e-08	0.000735683		DPP7	-0.0787588	5.70456e-09	7.30412e-05
PSMD6	-0.141417	3.21497e-08	0.000411709		PNPLA4	0.0522883	1.50172e-12	1.92356e-08		HBQ1	-0.0792462	3.61248e-07	0.00462542
REEP3	-0.14155	2.89866e-15	3.71203e-11		MTMR3	0.0521707	1.64835e-08	0.000211138		GNG12	-0.0800565	6.77051e-10	8.66896e-06
EMX2OS	-0.141563	2.31419e-15	2.96356e-11		SEMA4C	0.0521469	4.031e-07	0.00516331		KDM5D	-0.0841145	6.61805e-21	8.47375e-17
MRPL36	-0.141582	8.53319e-10	1.09276e-05		PIK3R2	0.0520882	1.60611e-10	2.05726e-06		FAM171A2	-0.0861712	2.85685e-08	0.000365791
TPM4	-0.141646	1.20512e-08	0.000154327		SPIDR	0.0519693	3.33406e-08	0.000427059		RP11-455F5.3	-0.0893633	2.23695e-09	2.8642e-05
C17orf89	-0.141767	2.07873e-09	2.66202e-05		C2orf80	0.051811	4.65424e-08	0.000596162		AGPAT2	-0.0915374	6.44362e-11	8.25041e-07
ETFA	-0.142065	1.062e-08	0.000135999		MIR181A2HG	0.0517818	1.94444e-08	0.000249064		BTBD6	-0.0916672	6.75421e-11	8.64808e-07
PRKDC	-0.142602	1.14854e-07	0.00147082		PIK3IP1	0.0514903	1.5313e-07	0.00196144		ANKRD37	-0.0933318	3.95269e-09	5.06102e-05
RAB2A	-0.142775	5.10756e-09	6.54075e-05		GPHN	0.0511348	1.58327e-07	0.00202801		CTSC	-0.0937244	9.53057e-08	0.00122029
HEBP2	-0.142858	5.79428e-09	7.42015e-05		NYNRIN	0.0511248	4.85779e-07	0.00622235		HOMER3	-0.0957289	3.49483e-07	0.00447478
SNF8	-0.142928	1.80596e-08	0.000231271		SH3GL3	0.0510646	8.30873e-10	1.06426e-05		ALPK1	-0.0992273	2.24315e-07	0.00287213
COPS8	-0.143297	9.83546e-08	0.00125953		OSBPL11	0.0510316	4.94819e-08	0.000633813		TAGLN2	-0.0994369	4.67171e-07	0.00598166
ATXN10	-0.143483	5.37114e-09	6.87829e-05		PID1	0.0510246	3.34099e-10	4.27947e-06		ID3	-0.102022	7.18491e-16	9.19956e-12
DTWD1	-0.143487	2.3227e-12	2.97445e-08		RP3-394A18.1	0.0509053	1.41265e-07	0.00180946		COPE	-0.103275	4.48973e-07	0.00574865
CENPV	-0.143506	3.16638e-09	4.05487e-05		TAMM41	0.0508793	3.248e-07	0.00416036		FOXP4	-0.103306	4.02207e-10	5.14986e-06
NDUFA12	-0.143715	9.55066e-11	1.22306e-06		LINC01224	0.050834	1.28748e-07	0.00164914		MGP	-0.103871	1.56401e-18	2.00256e-14
CCNI	-0.143826	2.10027e-13	2.6896e-09		USP18	0.0507896	2.78624e-10	3.5689e-06		SMOC1	-0.104043	1.59562e-09	2.04303e-05
ANAPC11	-0.14414	2.8418e-10	3.63921e-06		FCHO1	0.0506518	1.60318e-07	0.00205351		TLE2	-0.104083	4.2164e-07	0.00539868
MRPL40	-0.144453	5.6561e-10	7.2432e-06		MT3	0.050608	6.67991e-07	0.00855629		NBL1	-0.104324	3.49385e-08	0.000447352
MED28	-0.144483	2.54411e-07	0.00325799		NTRK2	0.0506059	9.95527e-08	0.00127517		CLTA	-0.110495	2.58273e-07	0.00330692
ITM2B	-0.144689	1.9694e-08	0.000252201		PCDH18	0.0505556	6.54036e-08	0.000837755		HIST1H2AC	-0.111704	1.47861e-11	1.89321e-07
UQCRC1	-0.14519	5.30406e-08	0.000679238		PRPS2	0.0504369	3.70477e-09	4.74544e-05		CIRBP	-0.113717	5.19229e-07	0.00664821
PPP1CA	-0.145383	1.5273e-08	0.000195587		PVRL3	0.050436	1.04309e-07	0.00133609		CCDC92	-0.116103	6.54867e-08	0.000838491
TMEM98	-0.14573	8.08322e-08	0.00103514		SPOCK1	0.0503794	1.78008e-07	0.0022801		SKP1	-0.116122	3.28899e-07	0.00421122
TRAPPC1	-0.145754	2.00118e-08	0.000256271		IFI16	0.0502793	2.20795e-08	0.000282817		COL9A3	-0.117454	3.80596e-11	4.87315e-07
VPS35	-0.145854	1.0524e-08	0.00013477		PRKAB1	0.0502638	5.02673e-07	0.00643874		NECAB3	-0.118887	2.85222e-08	0.000365198
QDPR	-0.145859	7.30168e-09	9.35053e-05		SLC25A44	0.0502535	5.8798e-09	7.53143e-05		GSTO1	-0.118893	1.16494e-07	0.00149159
IFT57	-0.145886	5.5239e-09	7.0739e-05		TRIM8	0.0502097	4.17727e-08	0.000535066		FOXO6	-0.119229	4.48922e-11	5.748e-07
EIF3M	-0.146096	2.72764e-09	3.49301e-05		RPPH1	0.0501654	4.09049e-13	5.23951e-09		PEG3	-0.119999	7.13861e-27	9.14028e-23
MTCH2	-0.146318	1.93711e-09	2.48067e-05		B4GALNT1	0.0500848	1.59196e-07	0.00203914		IMPDH1	-0.121143	5.28387e-10	6.76547e-06
CCDC34	-0.14637	1.08456e-07	0.00138888		MUTYH	0.0500644	2.55004e-07	0.00326635		ERH	-0.12129	2.23123e-07	0.00285687
TMEM126B	-0.146708	9.1254e-11	1.1686e-06		FBXO46	0.049998	1.81829e-09	2.32905e-05		PLIN2	-0.122208	1.1538e-14	1.47733e-10
EPRS	-0.146878	6.94189e-09	8.88978e-05		GNAL	0.0499535	3.49364e-09	4.475e-05		USP9Y	-0.12278	1.95617e-29	2.50468e-25
GPX4	-0.147768	5.36553e-12	6.8711e-08		CPD	0.0499335	3.16203e-07	0.00405025		STMN2	-0.123663	6.23491e-10	7.98318e-06
STOML2	-0.147903	8.00217e-10	1.02476e-05		PRMT7	0.0499277	1.04214e-07	0.00133488		NEDD8	-0.123797	1.55733e-07	0.00199401
C1orf43	-0.148041	1.64484e-08	0.000210638		PACRGL	0.0498307	3.83666e-08	0.000491438		RPL27A	-0.124348	7.78971e-07	0.00997395
DKC1	-0.148527	6.92073e-09	8.86269e-05		TUBB3	0.0497433	4.4628e-07	0.0057164		CXADR	-0.124459	5.73382e-07	0.00734158
ACTL6A	-0.148558	8.98547e-10	1.15068e-05		MYC	0.0497331	5.02733e-07	0.00643951		PXMP2	-0.12473	5.8631e-14	7.50712e-10
SRSF5	-0.148612	1.12741e-12	1.44376e-08		CPOX	0.0497157	9.86811e-10	1.26401e-05		DESI1	-0.125637	2.32615e-10	2.9784e-06
TCEAL4	-0.148663	3.38093e-08	0.000432962		TRIL	0.0496973	5.93848e-08	0.00076066		PUS7L	-0.126614	3.78389e-10	4.84489e-06
SLC3A2	-0.14885	5.36841e-07	0.00687479		UNK	0.049659	5.89865e-07	0.00755557		AP2M1	-0.126624	6.02429e-07	0.0077135
PA2G4	-0.149323	1.69745e-09	2.17375e-05		GAL3ST3	0.0496079	6.71774e-07	0.00860475		JOSD2	-0.127516	5.8706e-09	7.51672e-05
ISYNA1	-0.149345	2.31759e-08	0.000296791		NUP98	0.0495599	2.24902e-07	0.00288077		PFDN2	-0.127675	3.87684e-08	0.000496391
FIBP	-0.150009	1.58893e-12	2.03478e-08		PLXNA1	0.0495269	4.25233e-07	0.00544682		PCMT1	-0.127933	4.08117e-07	0.00522553
RARS	-0.150248	1.10107e-11	1.41003e-07		SH2D3C	0.0495244	3.3919e-07	0.00434468		SFPQ	-0.128086	2.33194e-07	0.00298581
ILF2	-0.150325	4.6863e-10	6.00128e-06		GNPNAT1	0.0494908	1.86814e-07	0.00239291		HSBP1	-0.129968	8.20281e-08	0.00105029
PRDX2	-0.150377	4.72461e-15	6.05033e-11		ADAM23	0.0494739	7.60442e-08	0.00097405		CFDP1	-0.130939	1.36166e-07	0.00174347
AKR1B1	-0.150434	1.26548e-08	0.000162057		MAST2	0.0493806	2.91971e-08	0.000373986		SRSF5	-0.131161	1.48748e-07	0.00190457
CCT3	-0.150641	9.58583e-12	1.22756e-07		ZNF184	0.0493084	3.06154e-07	0.00392153		COX6B1	-0.131579	1.29512e-07	0.00165827
DDX50	-0.150662	1.69012e-10	2.16437e-06		CTC-534A2.2	0.0492972	4.39011e-08	0.000562329		ATP5B	-0.132711	5.11117e-09	6.54435e-05
FAM210B	-0.150719	3.47686e-18	4.45247e-14		PLA2G3	0.049288	1.10115e-15	1.41046e-11		MTDH	-0.133091	3.50873e-07	0.00449257
PHIP	-0.150973	8.47589e-08	0.00108542		HCN3	0.0490927	7.64616e-10	9.79397e-06		PFKP	-0.133526	1.68066e-08	0.000215192
CTBP2	-0.151147	8.32712e-09	0.000106637		NSUN2	0.0490096	1.12216e-07	0.00143737		RAC1	-0.13362	4.78658e-10	6.12873e-06
YARS	-0.15128	2.47853e-10	3.174e-06		PKP4	0.0489376	3.61131e-07	0.00462572		COX8A	-0.134083	6.68649e-09	8.56138e-05
PSMA3	-0.152027	1.41948e-09	1.81778e-05		ZNF266	0.0488252	2.40109e-09	3.07556e-05		UPF3A	-0.135289	7.77445e-07	0.00995441
TIMM13	-0.152088	7.71587e-09	9.88095e-05		KMT2D	0.0488108	1.1564e-07	0.00148123		GABARAPL2	-0.135639	1.14652e-08	0.000146801
ABRACL	-0.152161	1.19045e-10	1.5245e-06		ZNF454	0.0487601	8.13194e-16	1.04162e-11		SMC3	-0.136981	1.01663e-07	0.00130169
C11orf73	-0.152622	3.72258e-09	4.76714e-05		ASF1B	0.0487445	1.65086e-09	2.11459e-05		RPS24	-0.137087	2.48186e-08	0.000317777
BCCIP	-0.152893	6.83766e-11	8.75631e-07		NLRP2	0.0487084	1.77757e-22	2.27689e-18		COX7A2L	-0.137232	1.17821e-07	0.00150858
SRSF8	-0.152952	4.78188e-13	6.12368e-09		RP11-524C21.2	0.0484978	5.40428e-11	6.92234e-07		TXNL4A	-0.137991	2.84573e-07	0.00364368
NACA	-0.153158	4.52046e-19	5.78891e-15		FOXK2	0.0484444	7.21946e-07	0.00924741		RAP1GDS1	-0.139538	2.6834e-07	0.00343582
KCNG1	-0.153177	1.0079e-12	1.29072e-08		ESCO2	0.0483937	3.18567e-09	4.08053e-05		VAT1	-0.141788	1.02264e-08	0.000130939
PSMA1	-0.153598	5.26481e-11	6.74211e-07		PLPPR5	0.0483316	4.71187e-07	0.00603543		UQCRQ	-0.142056	3.0192e-07	0.00386578
CWC27	-0.153676	1.24819e-09	1.59844e-05		NEK6	0.0483003	7.11773e-07	0.0091171		PGLS	-0.142449	5.63318e-07	0.00721273
JTB	-0.153912	9.23148e-10	1.18218e-05		CARD8	0.0482827	1.86466e-08	0.000238844		UQCRC2	-0.14248	8.92219e-08	0.0011424
XRCC6	-0.153968	1.90257e-10	2.43643e-06		IFFO1	0.0482154	2.11967e-07	0.00271509		ZFPM2	-0.143555	7.12126e-09	9.11807e-05
SNRPC	-0.154263	3.85054e-09	4.93101e-05		PLEKHG4B	0.0481049	1.35738e-07	0.00173867		KLHL23	-0.143742	6.86416e-07	0.00878887
MAT2B	-0.154361	1.8008e-10	2.3061e-06		PCDHB15	0.0481003	3.67388e-09	4.70587e-05		UQCR11	-0.145229	3.1384e-10	4.01841e-06
NHP2	-0.154371	8.09011e-10	1.03602e-05		CCDC85C	0.0480433	2.12166e-07	0.00271763		ANAPC15	-0.145238	1.25112e-07	0.00160194
PYURF	-0.154957	3.58118e-10	4.58606e-06		HS6ST2	0.0478439	3.62741e-07	0.00464635		ZFHX2	-0.14549	2.02413e-16	2.5917e-12
STRBP	-0.155172	4.69895e-11	6.01747e-07		ELMO1	0.047834	4.35754e-08	0.000558158		MRPL19	-0.145547	2.65545e-07	0.00340004
CNPY2	-0.155449	1.73525e-09	2.22216e-05		ADORA2A-AS1	0.0478131	5.84007e-09	7.48054e-05		DECR1	-0.145807	3.56654e-12	4.5666e-08
EEF1E1	-0.155906	5.22988e-10	6.69739e-06		SFI1	0.0477224	1.32064e-07	0.00169161		CRIPT	-0.146561	1.27223e-07	0.00162897
SDHC	-0.155964	1.47469e-09	1.88849e-05		CDC6	0.0474697	5.11904e-07	0.00655698		MZT2A	-0.146583	3.57849e-07	0.00458189
METTL5	-0.15607	1.63035e-10	2.08782e-06		ELOVL2	0.0473804	7.34019e-09	9.40206e-05		UQCR10	-0.146667	8.00168e-08	0.00102454
NUP37	-0.156166	1.54371e-10	1.97688e-06		ZNF784	0.047329	1.16996e-10	1.4986e-06		COX7C	-0.146807	1.74259e-09	2.23121e-05
UBXN4	-0.156656	1.71348e-10	2.19428e-06		NDST4	0.0472654	2.36531e-10	3.02972e-06		DEF8	-0.146894	2.60707e-07	0.00333809
PARP1	-0.156791	3.45373e-12	4.42285e-08		ZNF548	0.0472341	7.23434e-07	0.00926647		LINC01003	-0.147306	2.95958e-07	0.00378944
NASP	-0.156911	5.52198e-08	0.000707145		MASTL	0.0472289	9.64758e-09	0.000123576		UBE2V2	-0.147659	8.43998e-09	0.000108065
DBN1	-0.157272	3.63765e-10	4.65838e-06		PDPN	0.0471618	1.9883e-07	0.00254681		RPAIN	-0.148072	5.42428e-09	6.94524e-05
MMADHC	-0.157432	4.4166e-09	5.6559e-05		EDEM2	0.0471401	6.19757e-07	0.00793846		KIF1B	-0.148155	8.87802e-08	0.00113674
SVIP	-0.157649	1.04409e-13	1.33706e-09		ASB13	0.0470542	6.62649e-08	0.000848787		EIF3A	-0.14824	4.08453e-07	0.00522983
SURF2	-0.158236	2.73028e-17	3.49639e-13		TUBA1C	0.047027	2.60781e-07	0.00334035		SOD1	-0.148299	5.32783e-10	6.82175e-06
STK24	-0.158308	5.03131e-21	6.4431e-17		ARNT2	0.0468943	3.57804e-07	0.00458311		RUVBL1	-0.148651	7.30382e-07	0.00935181
ATP5B	-0.159072	5.30988e-12	6.79983e-08		ANO5	0.0468782	4.41753e-11	5.65841e-07		HDLBP	-0.149053	8.52932e-08	0.00109209
THRAP3	-0.159568	2.10568e-10	2.69654e-06		PPP1R14C	0.0467	4.73054e-08	0.000605935		FAM210B	-0.149534	5.64149e-13	7.22337e-09
TCEAL2	-0.16009	5.45353e-14	6.98378e-10		PARPBP	0.046648	1.11038e-07	0.00142229		BLVRB	-0.149762	2.0354e-08	0.000260613
SKP1	-0.16016	4.47666e-15	5.73282e-11		IL17RC	0.0465587	7.12186e-08	0.000912238		ZNF580	-0.150142	4.23401e-07	0.00542122
HTATSF1	-0.160461	8.25595e-10	1.05726e-05		HLA-DMA	0.0461588	4.7883e-14	6.13334e-10		IDH2	-0.150251	2.87994e-07	0.00368748
CCT2	-0.160621	5.94664e-14	7.61527e-10		SPOPL	0.0460002	3.38088e-07	0.00433057		MASP1	-0.150723	4.19638e-09	5.37305e-05
GNG5	-0.16092	1.35722e-11	1.73805e-07		ALDH16A1	0.045926	1.81249e-07	0.00232162		BLOC1S1	-0.150752	3.22194e-07	0.00412537
GSPT1	-0.161315	1.26811e-09	1.62394e-05		DLX1	0.0458943	5.875e-17	7.52529e-13		PPP1CA	-0.15077	6.96623e-07	0.00891956
DNAJC7	-0.161676	2.72237e-10	3.48627e-06		PKD2	0.0457925	6.85427e-08	0.000877963		PSMD14	-0.15186	1.3675e-07	0.00175094
RUVBL1	-0.16183	5.78214e-11	7.40461e-07		NUAK2	0.0457899	1.60488e-08	0.000205569		SSR4	-0.152003	2.89977e-09	3.71287e-05
SNRPD3	-0.161955	2.09245e-10	2.67959e-06		ZNF554	0.0457583	5.16339e-09	6.61378e-05		PSMA1	-0.15206	1.73697e-08	0.000222401
C8orf33	-0.162238	3.78823e-11	4.85121e-07		INTS3	0.0456902	7.4629e-08	0.000955923		CAP2	-0.152581	1.69437e-07	0.00216947
PAPOLA	-0.162263	6.82826e-11	8.74427e-07		EEF1G	0.0455633	4.91065e-10	6.29005e-06		LINC00667	-0.152906	3.04225e-09	3.8953e-05
TMEM230	-0.162586	6.88909e-11	8.82217e-07		RFX1	0.0453961	6.58555e-07	0.00843543		RPL18	-0.153026	8.76301e-10	1.12202e-05
MRPL57	-0.162627	9.82027e-11	1.25758e-06		MTM1	0.0453161	1.4371e-09	1.84078e-05		PNISR	-0.153619	6.43149e-10	8.23488e-06
HSPB11	-0.162805	8.03519e-10	1.02899e-05		SRF	0.045309	6.1143e-09	7.83181e-05		SMIM14	-0.153806	6.98813e-07	0.00894761
BSG	-0.163009	1.62244e-12	2.0777e-08		SORCS3	0.0452827	4.18831e-10	5.36481e-06		PTMA	-0.153828	3.48429e-11	4.46128e-07
H2AFY	-0.163341	1.54188e-12	1.97453e-08		PPP2R3B	0.0451249	3.18186e-07	0.00407565		RNASEH2C	-0.154222	9.90936e-13	1.26879e-08
CNIH1	-0.163819	3.05253e-09	3.90907e-05		CDH20	0.0451033	1.01421e-12	1.2991e-08		VKORC1	-0.154438	5.7114e-07	0.00731288
CASP6	-0.163987	7.30071e-20	9.34929e-16		RAB31	0.0449382	6.47939e-11	8.29945e-07		FEZ1	-0.154781	4.09553e-11	5.24391e-07
RP11-455F5.3	-0.164264	1.55759e-48	1.99465e-44		POLD1	0.0448708	1.45943e-07	0.00186939		MRPL20	-0.155994	2.06899e-07	0.00264914
FZD3	-0.164513	5.97668e-09	7.65374e-05		ZCCHC18	0.044812	4.04289e-09	5.17853e-05		EPRS	-0.15608	5.05852e-07	0.00647693
GTF3A	-0.164699	5.29719e-11	6.78358e-07		GAS2L3	0.0446119	5.89843e-07	0.0075553		ATP5A1	-0.156213	2.03361e-11	2.60384e-07
NDUFAF3	-0.165115	6.37345e-10	8.16184e-06		MAPK4	0.0443669	9.07113e-09	0.000116192		GSTM3	-0.156526	2.04297e-07	0.00261582
ITGA2	-0.165408	4.20174e-26	5.38074e-22		TRO	0.0440341	3.24954e-07	0.00416234		SH3BP5	-0.15667	6.92318e-07	0.00886444
KIF15	-0.165497	1.24128e-10	1.58958e-06		IL1RAPL1	0.0439588	1.18015e-10	1.51166e-06		EMC4	-0.156724	2.02724e-08	0.000259567
RPS9	-0.165748	2.52885e-25	3.23844e-21		RP11-15A1.3	0.04363	2.85519e-10	3.65721e-06		PPP1R14B	-0.156867	3.72353e-09	4.7676e-05
VIM	-0.166807	6.78257e-17	8.68575e-13		CDC25A	0.0435563	1.18207e-09	1.51411e-05		ECI2	-0.156889	2.98706e-10	3.82464e-06
SYNCRIP	-0.167511	9.61738e-11	1.2316e-06		SLC16A7	0.0435384	4.98537e-07	0.00638575		HNRNPDL	-0.156899	4.37563e-10	5.60256e-06
MESDC2	-0.167658	3.84965e-11	4.92986e-07		FKBPL	0.0435011	2.54563e-07	0.00326069		CA12	-0.157004	1.47177e-19	1.88446e-15
CUTA	-0.167739	9.66394e-12	1.23756e-07		PLXND1	0.043417	5.47024e-08	0.000700683		MOCS2	-0.157292	8.7334e-08	0.00111822
TCTEX1D2	-0.167963	1.00362e-10	1.28524e-06		KLF11	0.0433995	3.16975e-08	0.000406013		ERCC1	-0.157444	2.60578e-09	3.33644e-05
CCDC109B	-0.168359	1.74966e-11	2.24061e-07		TOX2	0.0432791	1.53552e-07	0.00196685		ATP6V1F	-0.157523	2.06571e-10	2.64494e-06
HILPDA	-0.168365	1.32557e-13	1.69753e-09		DCAF4	0.0430387	2.34662e-09	3.00578e-05		SNX6	-0.157628	3.09154e-07	0.00395841
HAUS1	-0.16868	6.38299e-10	8.17406e-06		TRAF3	0.0430005	4.62642e-07	0.00592599		AFF3	-0.157837	5.8531e-09	7.4943e-05
HMGA2	-0.168789	2.22489e-10	2.8492e-06		LINC00205	0.0429754	3.07246e-07	0.00393552		SEC11C	-0.15788	1.18547e-08	0.000151787
PPP1R14B	-0.169316	3.52225e-12	4.51059e-08		CHL1	0.0429463	6.10752e-22	7.82312e-18		PHLDA1	-0.158584	1.85354e-08	0.000237328
UFC1	-0.169457	6.1726e-11	7.90463e-07		MYL5	0.0429166	7.39143e-08	0.000946768		RAI14	-0.158613	2.05859e-08	0.000263582
C11orf31	-0.169559	9.88983e-11	1.26649e-06		FHL2	0.0427443	1.51434e-10	1.93972e-06		RNF7	-0.158662	2.24615e-08	0.000287598
RPS18	-0.170158	1.72727e-23	2.21194e-19		TFE3	0.0425697	3.18493e-09	4.07958e-05		APOA1BP	-0.158662	1.12872e-11	1.44521e-07
PCM1	-0.17021	2.10612e-09	2.6971e-05		DERL3	0.0424939	5.70897e-13	7.31262e-09		ATP6V1D	-0.158734	7.9687e-09	0.000102031
PSMD5-AS1	-0.170301	5.60792e-53	7.1815e-49		DNM1	0.0423952	1.62202e-07	0.00207764		AKR1B1	-0.159074	5.13477e-08	0.000657456
ADSL	-0.170383	5.9041e-14	7.56079e-10		IGSF1	0.0421041	4.70126e-17	6.02184e-13		MESDC2	-0.159896	3.27349e-07	0.00419138
NEDD8	-0.170669	7.43994e-11	9.52759e-07		SHD	0.0420766	1.14713e-11	1.46935e-07		DUSP14	-0.160097	1.02603e-10	1.31373e-06
RPSA	-0.170697	8.35032e-28	1.06934e-23		SYNDIG1	0.0419248	3.16997e-10	4.06042e-06		COX20	-0.160556	1.51825e-07	0.00194397
TMEM126A	-0.170708	2.85566e-13	3.65695e-09		ATG2A	0.0418916	2.3005e-07	0.00294671		CISD2	-0.16068	6.71931e-08	0.000860341
RBP1	-0.170941	2.80358e-23	3.59027e-19		VPS13B	0.0418527	6.15113e-08	0.000787898		HSD17B10	-0.161318	3.94317e-07	0.00504883
OLA1	-0.170998	5.96115e-12	7.63384e-08		NBPF1	0.041676	3.43851e-07	0.00440438		NAA38	-0.161491	9.82385e-08	0.00125785
RNF5	-0.171141	1.18887e-10	1.52247e-06		LINC01116	0.0415965	1.86287e-08	0.000238615		DCXR	-0.161554	9.99046e-10	1.27918e-05
DNAJA1	-0.171478	7.47946e-13	9.5782e-09		NHSL2	0.0415645	8.28817e-09	0.000106163		TRAPPC2L	-0.161837	5.72502e-08	0.000733032
CCDC25	-0.172228	5.73203e-12	7.34043e-08		CENPO	0.0413085	9.15308e-09	0.000117242		ETHE1	-0.162094	5.16152e-09	6.60881e-05
TIMM10	-0.172522	2.4332e-16	3.11596e-12		ZNF880	0.041301	5.68723e-07	0.00728477		TRAPPC1	-0.162263	1.27261e-09	1.62945e-05
MRPL20	-0.173028	1.87208e-11	2.39739e-07		LRRC37A2	0.041116	2.76603e-12	3.54301e-08		SEC61G	-0.1627	2.01674e-08	0.000258223
IFT22	-0.173886	9.54902e-17	1.22285e-12		TEAD3	0.0409805	2.87553e-10	3.68327e-06		SCAND1	-0.16296	5.09883e-09	6.52854e-05
H1FX	-0.174232	7.05681e-13	9.03695e-09		FZD1	0.0409327	6.65317e-08	0.000852205		CFL2	-0.163262	3.93337e-09	5.03629e-05
UBTF	-0.174503	1.5421e-17	1.97482e-13		RP11-983P16.4	0.0406817	4.13534e-09	5.29696e-05		NDUFS8	-0.16329	8.53622e-09	0.000109298
ENHO	-0.174887	1.19709e-12	1.533e-08		GHRL	0.0406256	6.37757e-08	0.000816902		PHYKPL	-0.163359	3.79743e-21	4.86223e-17
POLR2I	-0.175376	1.30745e-11	1.67432e-07		FAM168A	0.0406211	2.81048e-07	0.00359994		RPL29	-0.16375	1.53675e-12	1.96766e-08
TARS	-0.1756	2.40014e-15	3.07362e-11		PIR	0.0405451	1.94498e-08	0.000249133		CD63	-0.164507	3.32051e-08	0.000425159
ALDH7A1	-0.17564	1.7786e-11	2.27768e-07		CXXC4	0.0405237	5.00987e-12	6.41714e-08		RPL6	-0.164555	2.18675e-11	2.79991e-07
TPM1	-0.175877	1.05497e-10	1.351e-06		ZNF823	0.0404158	1.14369e-07	0.00146495		SNRNP25	-0.164703	4.4016e-09	5.63581e-05
ZNF706	-0.17588	8.05622e-12	1.03168e-07		SYT6	0.0402924	1.03011e-08	0.000131947		NDUFS6	-0.164916	1.04141e-09	1.33342e-05
C4orf27	-0.175947	1.04369e-10	1.33655e-06		ZFP28	0.0400271	3.79595e-08	0.000486223		NUDT5	-0.16501	1.16795e-09	1.49544e-05
U2SURP	-0.17599	4.78898e-11	6.13277e-07		ZNF174	0.0398797	7.67486e-07	0.00983072		ACTL6B	-0.165188	5.64975e-08	0.000723395
PFN1	-0.176339	2.06837e-13	2.64876e-09		VCAM1	0.0396061	1.58178e-08	0.00020261		CENPV	-0.16538	7.78634e-10	9.96963e-06
ATP5J2	-0.176485	4.72653e-16	6.0528e-12		CEP85	0.0395324	3.66153e-07	0.00469005		PRDX3	-0.165699	1.01246e-08	0.000129635
BRK1	-0.176891	5.81597e-15	7.44793e-11		SEMA4B	0.0395179	3.39767e-07	0.00435207		NDUFB8	-0.166423	7.08446e-10	9.07094e-06
TIMM8B	-0.176899	3.31954e-11	4.251e-07		BLM	0.0394942	2.98494e-07	0.00382341		FKBP2	-0.166547	1.29482e-07	0.00165789
SFRP1	-0.177098	4.82229e-18	6.17542e-14		PI4K2A	0.0392697	4.46743e-07	0.00572234		BCAP29	-0.167295	7.20747e-08	0.000922844
WDR18	-0.177482	2.6947e-13	3.45083e-09		NRXN3	0.0391943	2.5432e-13	3.25759e-09		PRDX2	-0.167659	1.69586e-16	2.17137e-12
YWHAB	-0.177597	3.95029e-13	5.05874e-09		ANKRD18B	0.03912	1.72417e-10	2.2085e-06		HILPDA	-0.167729	6.32421e-07	0.00809752
RPS3A	-0.177849	2.41197e-28	3.08877e-24		BRPF3	0.0390654	6.82038e-07	0.00873622		PLGRKT	-0.167959	4.98795e-08	0.000638657
GTF2A2	-0.178027	3.56481e-13	4.56509e-09		CEBPZOS	0.0387766	2.88601e-07	0.00369669		RABEP1	-0.167977	3.04934e-08	0.000390437
SNRPE	-0.178058	4.14362e-16	5.30632e-12		AR	0.0386392	1.4749e-07	0.00188919		ZNF428	-0.168322	6.29052e-12	8.05439e-08
NKAIN3	-0.178199	1.77804e-10	2.27696e-06		ZFP69	0.0385048	1.17419e-07	0.00150402		TMEM14C	-0.168354	3.18273e-08	0.000407517
PRDX6	-0.178345	1.78994e-14	2.2922e-10		CDR2	0.0382149	8.56278e-08	0.00109681		RP11-706O15.5	-0.168368	4.29077e-40	5.4939e-36
HSPE1	-0.178349	1.44758e-14	1.85378e-10		PRR7-AS1	0.0379182	5.08207e-13	6.50962e-09		FAAP20	-0.168437	2.29748e-08	0.00029417
SLC39A6	-0.178601	2.17222e-12	2.78174e-08		FAM107A	0.037574	1.26121e-07	0.00161549		TPT1	-0.168563	7.52616e-09	9.63649e-05
COMMD3	-0.178628	1.4941e-13	1.91334e-09		ADM5	0.0375649	7.8597e-11	1.00675e-06		SLC25A6	-0.168572	5.44284e-08	0.000696901
DDX1	-0.179739	1.29177e-11	1.65424e-07		CTD-2008L17.2	0.0374384	6.99513e-15	8.96006e-11		SERINC2	-0.168746	1.47439e-09	1.88781e-05
ZFR	-0.181049	3.26641e-12	4.18296e-08		FAM72C	0.0373157	9.80683e-10	1.25616e-05		NDUFS7	-0.169877	1.11008e-09	1.42135e-05
CNIH4	-0.181149	1.30635e-10	1.67291e-06		THSD4	0.0372629	7.4131e-07	0.00949544		CTXN1	-0.169902	3.46096e-09	4.43142e-05
POLR2J	-0.181341	8.36139e-13	1.07076e-08		PGBD5	0.0372073	7.71425e-07	0.00988118		RPL28	-0.169979	7.1573e-09	9.1642e-05
CDKN3	-0.181695	1.42283e-07	0.00182208		PKMYT1	0.0370699	5.61155e-08	0.000718784		POLR2K	-0.170547	1.67228e-09	2.14118e-05
ANXA6	-0.181958	1.27203e-19	1.62896e-15		RP11-69E11.4	0.0369935	1.93275e-12	2.47565e-08		HMGB1	-0.170882	4.10838e-20	5.26037e-16
EEF1A2	-0.182744	2.38654e-39	3.0562e-35		ZNF335	0.0368783	4.41273e-07	0.00565226		RPS15A	-0.170886	5.1863e-10	6.64054e-06
MRPL11	-0.182898	2.29509e-13	2.93909e-09		AK5	0.0368645	2.76822e-08	0.000354581		PPP2R2B	-0.170999	1.07095e-08	0.000137125
SERBP1	-0.18318	1.35228e-19	1.73173e-15		MITF	0.0367325	1.14608e-09	1.46801e-05		COPS3	-0.171006	7.27685e-09	9.31728e-05
TXNDC17	-0.183235	2.74134e-14	3.51056e-10		FAM78B	0.0367208	1.50168e-08	0.000192351		SMARCB1	-0.171493	1.11445e-08	0.000142694
ATP5F1	-0.18376	1.62567e-13	2.08183e-09		TYK2	0.0367171	2.90403e-07	0.00371977		ALDH2	-0.172455	3.82049e-08	0.000489176
RAN	-0.183955	8.41334e-18	1.07741e-13		LILRB3	0.036716	1.81034e-10	2.31887e-06		PLPP5	-0.172553	1.0112e-11	1.29473e-07
ATP5C1	-0.184093	2.66305e-14	3.4103e-10		MBNL2	0.0367071	6.57876e-08	0.000842674		ARPC1A	-0.17259	9.07638e-09	0.000116214
SF3B2	-0.184229	4.78533e-14	6.1281e-10		C2orf42	0.0366506	6.7615e-07	0.00866081		NDUFA3	-0.172757	5.55361e-09	7.11084e-05
UPF3A	-0.184518	1.30095e-11	1.66599e-07		CHAF1B	0.0366427	4.51252e-07	0.00578009		ETFA	-0.173317	4.66721e-09	5.9759e-05
TTTY15	-0.18484	6.41821e-70	8.21916e-66		BICC1	0.0366184	2.90275e-07	0.00371813		TAF9	-0.173393	2.82262e-08	0.000361408
TMEM14C	-0.184892	3.48781e-14	4.46648e-10		SKA3	0.036309	7.06242e-07	0.00904625		TMSB10	-0.174036	4.56359e-14	5.84322e-10
NDUFB6	-0.184917	3.62772e-13	4.64566e-09		TNFRSF25	0.0363051	4.82527e-07	0.00618068		SNRPC	-0.174144	1.32871e-08	0.000170127
SRSF7	-0.185046	3.3504e-13	4.29053e-09		ORC1	0.036205	1.00759e-09	1.29062e-05		SNAPC3	-0.174192	4.01702e-08	0.000514339
UBE2I	-0.185573	1.64906e-14	2.11178e-10		PVR	0.0362001	4.11684e-07	0.00527326		CLIC1	-0.174598	8.96887e-10	1.14837e-05
PDLIM1	-0.185839	3.01498e-33	3.86099e-29		MYH7B	0.0361352	2.08248e-08	0.000266745		BSG	-0.175025	8.84218e-10	1.13215e-05
C7orf50	-0.186359	1.54374e-12	1.97692e-08		COL26A1	0.0358799	1.13144e-07	0.00144926		NDUFB1	-0.175513	2.29594e-09	2.93972e-05
DNAJC19	-0.186447	1.00544e-12	1.28756e-08		LRIG3	0.0358493	2.70481e-07	0.0034646		MT-ND6	-0.175636	1.63004e-13	2.08711e-09
PSME2	-0.188098	4.83288e-15	6.18899e-11		OVOS2	0.0357228	3.06311e-08	0.000392354		HRAS	-0.176358	6.0482e-09	7.74411e-05
DTYMK	-0.188537	1.11683e-10	1.43021e-06		ADGRA1	0.0355911	2.52232e-09	3.23084e-05		ATP5D	-0.177068	8.11764e-11	1.03938e-06
FAAP20	-0.1891	5.3805e-14	6.89027e-10		RP11-791G15.2	0.0353145	1.0161e-12	1.30152e-08		ZCRB1	-0.177949	1.21723e-09	1.55854e-05
ARPC3	-0.189337	5.16003e-15	6.60794e-11		TMEM150C	0.0353058	6.96639e-09	8.92325e-05		MCTS1	-0.178019	3.55597e-09	4.55307e-05
YBX1	-0.189698	1.26607e-35	1.62133e-31		PXMP4	0.034892	4.41813e-07	0.00565918		LYRM4	-0.178501	9.60384e-09	0.000122968
RPL7	-0.18987	1.77199e-30	2.26921e-26		SEMA5A	0.0346298	4.91384e-07	0.00629414		HSPB11	-0.178797	8.09302e-10	1.03623e-05
SSRP1	-0.189877	2.6105e-12	3.34301e-08		PLGLB1	0.0344305	6.19458e-09	7.93464e-05		SRPK1	-0.178885	1.27772e-09	1.63599e-05
MEA1	-0.190632	7.86738e-15	1.0075e-10		CSPG5	0.0343671	7.11688e-07	0.00911601		RPL24	-0.179022	4.455e-13	5.70418e-09
SARS	-0.190839	2.76472e-11	3.5405e-07		EBF4	0.0343525	9.65205e-08	0.00123633		PSMD8	-0.179258	2.26947e-11	2.90582e-07
EGR1	-0.192177	6.39452e-13	8.18882e-09		LINC01102	0.0342367	4.78444e-07	0.00612839		SPOCK1	-0.17926	2.09025e-09	2.67635e-05
SERF2	-0.192213	1.1089e-21	1.42005e-17		FRRS1L	0.0342245	3.57599e-07	0.00458048		RPL13A	-0.179619	2.76179e-14	3.5362e-10
TRAPPC2L	-0.19252	1.18781e-16	1.52111e-12		ZNF404	0.0342215	1.85225e-10	2.37255e-06		EID1	-0.179754	1.07322e-13	1.37415e-09
HNRNPA3	-0.193427	1.12966e-16	1.44664e-12		SP8	0.0341926	6.19874e-07	0.00793996		RPL9	-0.17994	1.35281e-12	1.73213e-08
HDDC2	-0.193571	5.15968e-14	6.60749e-10		CFLAR	0.033899	1.97266e-07	0.00252678		UBE2E3	-0.180043	6.77692e-09	8.67716e-05
DUT	-0.193863	8.00219e-10	1.02476e-05		DHRS4	0.033735	6.06278e-11	7.76581e-07		HNRNPD	-0.180256	2.57844e-09	3.30144e-05
TSPAN6	-0.193953	3.30423e-14	4.2314e-10		WFS1	0.0336496	1.26187e-07	0.00161633		ANP32A	-0.180567	3.09286e-07	0.00396009
ERP29	-0.193959	6.55088e-14	8.38906e-10		RAPH1	0.0336127	3.20638e-07	0.00410706		PNN	-0.180938	8.00074e-10	1.02441e-05
DBI	-0.194215	1.04256e-10	1.3351e-06		KIF18B	0.0335065	3.67371e-08	0.000470565		CCT6A	-0.181506	1.73395e-11	2.22014e-07
HN1	-0.194361	1.64741e-12	2.10967e-08		AC004381.6	0.0334728	5.43399e-08	0.00069604		ATP5G3	-0.181878	2.63918e-13	3.3792e-09
NUDT5	-0.19452	2.06807e-14	2.64837e-10		GYG2	0.0331213	3.33184e-08	0.000426775		RPL14	-0.182505	6.63983e-16	8.50164e-12
PRDX1	-0.194623	1.0473e-16	1.34117e-12		ZNRF3-AS1	0.0330278	5.84866e-07	0.00749154		KIF2A	-0.182671	4.23897e-09	5.42757e-05
CYC1	-0.194676	1.14067e-15	1.46074e-11		IGSF11	0.0328355	3.98621e-07	0.00510594		SPAG16	-0.183188	2.44939e-10	3.1362e-06
EXOSC8	-0.194737	2.17822e-12	2.78943e-08		LAG3	0.0326943	1.35261e-08	0.000173255		ANAPC16	-0.183542	2.37782e-09	3.04456e-05
BEX4	-0.195408	1.14829e-12	1.47051e-08		ZNF829	0.0325441	1.47196e-13	1.88543e-09		OAZ1	-0.183829	5.17997e-15	6.63244e-11
ZEB1	-0.196231	2.64868e-14	3.39189e-10		NEBL	0.0324348	5.11028e-07	0.00654576		XPR1	-0.184022	2.16969e-08	0.000277807
RPP25L	-0.196526	1.37396e-22	1.75949e-18		CSMD2	0.0323692	2.91216e-09	3.73019e-05		DAB1	-0.184707	9.82236e-10	1.25765e-05
SNX6	-0.197993	3.22083e-14	4.1246e-10		SEMA3B	0.0322395	1.54367e-10	1.97729e-06		PSMA4	-0.185485	8.91716e-10	1.14175e-05
ATP5G2	-0.198289	6.50452e-26	8.32969e-22		AC016549.1	0.031726	4.55432e-07	0.00583363		SHTN1	-0.185608	2.83126e-07	0.00362515
SOX3	-0.198364	3.32063e-12	4.2524e-08		MUC20	0.0316521	2.79074e-07	0.00357465		KDM5B	-0.186454	6.67043e-10	8.54082e-06
ATP5H	-0.200091	4.97317e-15	6.36864e-11		DEPTOR	0.031388	8.86989e-08	0.00113614		PIN1	-0.186578	3.09452e-10	3.96223e-06
RSL24D1	-0.201008	7.88878e-17	1.01024e-12		LRAT	0.031381	3.08143e-13	3.94701e-09		SRRM4	-0.187145	4.74066e-10	6.06994e-06
TPGS2	-0.20215	2.91224e-14	3.72941e-10		LIN54	0.0312931	6.20757e-09	7.95128e-05		KIF5C	-0.187285	4.91324e-22	6.29092e-18
OARD1	-0.203141	1.97388e-15	2.52775e-11		TNFRSF19	0.0309862	4.51586e-07	0.00578437		FOXG1	-0.187348	2.54878e-09	3.26346e-05
CDK4	-0.203429	2.69609e-15	3.45261e-11		FAM218A	0.0308751	1.00203e-15	1.28351e-11		AKT3	-0.187516	2.6347e-09	3.37347e-05
MRPL23	-0.203683	3.40744e-21	4.36357e-17		DND1	0.0308503	3.22273e-11	4.128e-07		EZR	-0.187694	1.3344e-08	0.000170857
UQCRH	-0.203906	2.51017e-28	3.21452e-24		PCSK9	0.030826	4.85854e-09	6.2233e-05		LSM2	-0.188153	1.51273e-10	1.9369e-06
CDCA7L	-0.205616	9.16126e-15	1.17319e-10		MAOA	0.0303584	7.52575e-08	0.000963974		TCEB1	-0.188259	4.50745e-12	5.77134e-08
COPS3	-0.205854	7.16394e-18	9.17414e-14		NOMO3	0.0295858	4.52085e-07	0.00579076		C11orf58	-0.188335	2.14671e-10	2.74865e-06
SIVA1	-0.206469	2.24002e-15	2.86857e-11		AC074289.1	0.0292706	2.55323e-09	3.27043e-05		CCT2	-0.188563	1.79154e-13	2.29388e-09
LYRM4	-0.206779	1.28366e-16	1.64386e-12		RP11-386G11.10	0.028476	3.17333e-08	0.000406471		UBE2D2	-0.188602	2.39164e-13	3.06225e-09
XRN2	-0.20683	6.30085e-16	8.06887e-12		SIRPA	0.0283637	1.62342e-07	0.00207944		NDUFA12	-0.188832	4.2296e-12	5.41558e-08
STRA6	-0.206926	2.29212e-45	2.9353e-41		RIIAD1	0.0282705	2.19064e-07	0.00280599		RPL36AL	-0.189215	5.47336e-12	7.00809e-08
CTXN1	-0.207123	2.17477e-18	2.78501e-14		RP11-493L12.4	0.028243	1.3715e-09	1.75675e-05		SNRPG	-0.189256	3.28777e-11	4.20967e-07
PEBP1	-0.207433	2.29997e-21	2.94535e-17		EPHA6	0.027801	5.11612e-07	0.00655323		SNF8	-0.190149	4.16877e-10	5.33769e-06
PARK7	-0.207777	1.50779e-21	1.93088e-17		KCNIP1	0.0276427	1.74815e-07	0.0022392		MRPL42	-0.190343	1.58336e-10	2.02734e-06
ANXA5	-0.20823	1.22513e-15	1.5689e-11		RP11-166B2.1	0.0275376	2.44388e-13	3.13037e-09		TAC3	-0.190375	4.37877e-13	5.60657e-09
RPS6	-0.208479	6.49976e-32	8.32359e-28		BRIP1	0.0274883	7.41681e-08	0.000950019		ST18	-0.190647	4.28062e-12	5.48091e-08
TRAPPC4	-0.208566	9.51357e-17	1.21831e-12		PMP2	0.027158	7.97805e-09	0.000102191		FKBP3	-0.190988	6.62239e-12	8.4793e-08
MFAP2	-0.208659	1.23059e-21	1.57589e-17		PCDH19	0.0257893	1.88133e-07	0.0024098		GLRX	-0.191326	1.24623e-09	1.59567e-05
RNASEH2C	-0.209053	1.61806e-19	2.07209e-15		SST	0.0254605	5.27967e-07	0.00676273		ZNF280D	-0.191524	5.53011e-20	7.08076e-16
IK	-0.209149	1.49492e-15	1.91439e-11		CCDC144A	0.0250989	3.77132e-08	0.000483068		CORO2B	-0.191867	3.5868e-11	4.59255e-07
FAM184B	-0.210522	5.18603e-60	6.64123e-56		TGM4	0.0250585	1.40109e-09	1.79466e-05		CYB5A	-0.191896	3.4901e-11	4.46873e-07
TMEM147	-0.210543	1.45559e-16	1.86403e-12		DPP6	0.0243097	2.44388e-13	3.13037e-09		SSB	-0.192456	1.05179e-11	1.34672e-07
PPA1	-0.211563	3.14791e-18	4.03121e-14		RP11-262H14.3	0.0240965	7.07571e-09	9.06328e-05		RALY	-0.192556	1.68115e-10	2.15254e-06
SNRPD1	-0.211564	1.30064e-18	1.6656e-14		FABP3	0.0239956	3.04917e-08	0.000390568		PHB	-0.193122	1.02634e-10	1.31413e-06
HNRNPDL	-0.211847	1.61148e-19	2.06366e-15		RP11-347P5.1	0.0227738	2.42691e-08	0.000310863		RPS5	-0.193357	1.90049e-18	2.43339e-14
AHCY	-0.212354	3.81051e-17	4.87973e-13		MYOM2	0.0227695	3.6232e-11	4.64095e-07		NENF	-0.194301	1.91297e-10	2.44936e-06
ATP6V1G1	-0.213281	1.67541e-20	2.14553e-16		RP11-276H19.2	0.0214856	5.45864e-07	0.00699197		FKBP1B	-0.195235	2.58567e-10	3.3107e-06
SMARCC1	-0.213348	1.7039e-15	2.18201e-11		GSX2	0.0212703	1.44335e-08	0.000184878		UFC1	-0.195533	1.21274e-10	1.5528e-06
PPP2R2B	-0.21389	1.78587e-17	2.28698e-13		PHF11	0.0205005	5.234e-08	0.000670423		TIMM8B	-0.195708	1.79235e-11	2.29493e-07
FAM89B	-0.214202	1.721e-23	2.20391e-19		LRP4-AS1	0.0203679	4.79147e-07	0.0061374		MT-ND2	-0.196118	5.88807e-15	7.53909e-11
TXN	-0.214384	4.27953e-19	5.48036e-15		FAM72B	0.0202311	1.91891e-09	2.45793e-05		UBE2D1	-0.19616	2.36721e-11	3.03098e-07
NARS	-0.21446	1.71428e-15	2.19531e-11		STARD13	0.0196901	8.59251e-08	0.00110061		RPS28	-0.197149	6.08613e-14	7.79268e-10
CCT4	-0.214555	6.91756e-21	8.85862e-17		PTH2R	0.0158483	3.20949e-07	0.00411103		THUMPD3-AS1	-0.197385	2.0943e-09	2.68154e-05
RAB13	-0.215132	1.60791e-20	2.05909e-16		APOA2	-0.0344821	2.35867e-07	0.00302123		POLR2F	-0.197461	3.35743e-10	4.29885e-06
LARS	-0.215631	1.19943e-15	1.53599e-11		NLGN4Y	-0.0393672	9.02729e-09	0.000115631		WDR18	-0.197479	2.26797e-13	2.90391e-09
PFDN4	-0.215784	1.94547e-14	2.49137e-10		AFP	-0.0408311	2.46498e-08	0.00031574		HMGN3	-0.198447	3.07536e-11	3.93769e-07
NDUFB9	-0.21585	1.76165e-17	2.25597e-13		RP3-402G11.26	-0.0425746	2.92936e-07	0.00375222		B3GAT1	-0.199137	7.12857e-11	9.12742e-07
DECR1	-0.216538	6.26153e-21	8.01851e-17		IGF2	-0.0442182	7.1146e-07	0.0091131		CPNE3	-0.199475	4.99259e-10	6.39251e-06
NAE1	-0.21742	7.27246e-16	9.31312e-12		S100A11	-0.0466313	5.92087e-07	0.00758405		FKBP1A	-0.200088	2.50225e-14	3.20389e-10
NME1	-0.217949	4.21865e-16	5.4024e-12		ZFY	-0.0489354	9.39082e-10	1.20287e-05		MSRB2	-0.200139	2.91906e-11	3.73756e-07
RANBP1	-0.218009	1.0915e-18	1.39777e-14		BTBD6	-0.0529458	7.10285e-07	0.00909804		THUMPD3	-0.200148	7.4933e-17	9.59442e-13
TAF9	-0.218515	5.59849e-21	7.16942e-17		PIK3CD-AS2	-0.0575436	6.99803e-09	8.96378e-05		C12orf57	-0.200249	3.86078e-13	4.94335e-09
NT5DC2	-0.218845	2.00222e-18	2.56404e-14		APOA1	-0.0616543	1.82465e-09	2.33719e-05		AP2S1	-0.200745	1.40381e-12	1.79744e-08
EMX1	-0.219135	2.40188e-16	3.07585e-12		KDM5D	-0.06177	7.90358e-13	1.01237e-08		ZC3H15	-0.200763	9.37944e-14	1.20094e-09
CEP70	-0.219476	1.3988e-18	1.79131e-14		LMO2	-0.0653258	9.7645e-08	0.00125074		METTL5	-0.201065	4.48483e-11	5.74237e-07
MFF	-0.21966	3.05478e-18	3.91195e-14		SLC17A6	-0.0665224	1.01353e-08	0.000129823		RPS27A	-0.201073	4.36104e-18	5.58387e-14
PSIP1	-0.219773	2.66592e-19	3.41397e-15		UTY	-0.0670346	2.8572e-13	3.65979e-09		TMEM230	-0.201367	1.28509e-13	1.64543e-09
PRMT1	-0.220166	3.82869e-18	4.90302e-14		STRA6	-0.0744352	3.26612e-10	4.18357e-06		CACNG8	-0.201667	1.03053e-10	1.31949e-06
MRPL42	-0.220594	1.06404e-16	1.36261e-12		PPP1R1B	-0.0760489	2.65658e-10	3.40281e-06		NME3	-0.203022	1.80899e-11	2.31623e-07
GDI2	-0.221223	1.13597e-17	1.45472e-13		DCN	-0.077202	6.01844e-12	7.70902e-08		PAFAH1B3	-0.203025	8.55951e-20	1.09596e-15
APEX1	-0.222767	2.82225e-17	3.61417e-13		MXRA8	-0.0804658	5.78188e-14	7.40601e-10		PTRHD1	-0.205786	1.11633e-14	1.42935e-10
COL9A3	-0.223366	2.60548e-37	3.33658e-33		GDF15	-0.0806859	5.6127e-07	0.00718931		2011-09-01	-0.205803	1.2445e-12	1.59346e-08
EIF4EBP1	-0.223642	6.60777e-11	8.4619e-07		COL3A1	-0.0839978	7.99013e-14	1.02346e-09		NDUFB3	-0.206048	9.58019e-12	1.22665e-07
PAICS	-0.224628	1.3363e-17	1.71126e-13		USP9Y	-0.0868669	7.6092e-18	9.74663e-14		LY6E	-0.206817	3.18879e-11	4.08293e-07
SUPT16H	-0.225228	9.75363e-17	1.24905e-12		FAM13C	-0.0871265	5.8627e-07	0.00750953		AK6	-0.207008	6.97168e-13	8.92654e-09
ACP1	-0.225592	2.69199e-20	3.44736e-16		RPL11	-0.0889094	4.94712e-07	0.00633677		NARF	-0.207219	2.60107e-11	3.33042e-07
BTF3	-0.22658	7.54045e-30	9.65629e-26		RPL13A	-0.0925929	1.7657e-07	0.00226169		TBCA	-0.207528	7.15912e-15	9.16654e-11
METRN	-0.228185	3.44265e-14	4.40866e-10		MT1X	-0.0941572	4.00191e-09	5.12605e-05		NDUFB2	-0.207572	7.66766e-14	9.81767e-10
UBXN1	-0.228214	5.91669e-18	7.57692e-14		EID1	-0.0942081	5.03218e-07	0.00644572		TMEM14A	-0.208055	5.25807e-12	6.73243e-08
DCTN3	-0.22839	7.1492e-13	9.15527e-09		ANKRD37	-0.0964173	2.40302e-07	0.00307803		SPCS2	-0.209386	2.13988e-13	2.7399e-09
NDUFAB1	-0.22862	3.43459e-22	4.39834e-18		LGALS1	-0.0985506	3.54813e-09	4.5448e-05		GABPB1-AS1	-0.209544	8.2425e-11	1.05537e-06
SRI	-0.229008	3.7593e-21	4.81416e-17		SEPP1	-0.0993314	2.95335e-10	3.78294e-06		GSTA4	-0.209544	1.01027e-13	1.29355e-09
RAC1	-0.229856	3.06736e-29	3.92806e-25		LUM	-0.0993768	2.94758e-14	3.77555e-10		UROS	-0.209909	5.94629e-13	7.61362e-09
CIRBP	-0.230247	4.9186e-23	6.29875e-19		RPL19	-0.110795	1.68734e-08	0.000216131		C1orf43	-0.210407	1.46565e-12	1.87662e-08
NFIB	-0.230393	5.02591e-15	6.43618e-11		RPL21	-0.112909	2.26783e-07	0.00290487		DCC	-0.210448	2.41595e-11	3.09338e-07
GNB2L1	-0.231426	7.67286e-40	9.82587e-36		RP4-665J23.1	-0.113051	6.61821e-11	8.47726e-07		RPL3	-0.210751	2.56855e-23	3.28878e-19
RPS19	-0.232175	5.13101e-45	6.57077e-41		ATP5B	-0.116336	3.73599e-08	0.000478543		PSMD5-AS1	-0.211327	1.06988e-37	1.36988e-33
HNRNPH3	-0.232336	8.26763e-23	1.05875e-18		RAB26	-0.118101	2.19772e-11	2.81506e-07		NHLH1	-0.21151	4.80965e-12	6.15828e-08
PXMP2	-0.232683	1.50961e-20	1.93321e-16		SRP9	-0.119026	3.28554e-08	0.000420844		FAM177A1	-0.21225	2.40944e-12	3.08504e-08
ZNF428	-0.232859	5.87615e-23	7.525e-19		RPS7	-0.120502	9.4689e-08	0.00121287		FABP5	-0.212307	3.01455e-11	3.85983e-07
RHEB	-0.233893	4.10411e-20	5.25573e-16		EBF2	-0.125687	4.51203e-10	5.77946e-06		COX6A1	-0.212479	6.05109e-19	7.74782e-15
SHMT2	-0.234124	1.17478e-19	1.50443e-15		PEG3	-0.128025	7.98873e-25	1.02328e-20		AURKAIP1	-0.212823	3.81669e-14	4.88689e-10
ECI1	-0.234793	5.39042e-20	6.90297e-16		RPS9	-0.129853	1.5507e-10	1.9863e-06		MDFI	-0.212888	1.03006e-20	1.31889e-16
DYNLL1	-0.234874	2.31933e-18	2.97014e-14		RPS13	-0.129974	7.66231e-10	9.81465e-06		SSU72	-0.213555	9.55249e-14	1.2231e-09
EIF3A	-0.235298	3.73595e-19	4.78426e-15		HIST1H2AC	-0.130256	3.05794e-11	3.91692e-07		TCEAL4	-0.214099	3.72681e-12	4.77181e-08
KIF5B	-0.235893	1.69315e-20	2.16825e-16		HIST1H2BD	-0.130597	2.33854e-08	0.000299544		CHMP4B	-0.214932	1.8651e-13	2.38807e-09
THUMPD3	-0.236381	1.01105e-37	1.29475e-33		MARCKSL1	-0.131529	3.5381e-13	4.53195e-09		GNG5	-0.214935	6.18537e-21	7.91974e-17
NDUFB5	-0.237705	5.1364e-19	6.57768e-15		RP11-455F5.3	-0.133173	6.44573e-17	8.25634e-13		TXN	-0.215596	4.74933e-16	6.08104e-12
UQCRFS1	-0.238038	6.6086e-21	8.46298e-17		PMAIP1	-0.134161	1.47867e-07	0.00189403		EIF4A2	-0.215599	3.6892e-18	4.72365e-14
POMP	-0.238569	1.3907e-22	1.78093e-18		C14orf2	-0.135694	3.56307e-08	0.000456393		UQCRC1	-0.215705	2.09984e-12	2.68863e-08
KLHDC2	-0.238873	2.34824e-21	3.00715e-17		CCT8	-0.136053	1.80152e-07	0.00230757		NDUFS4	-0.215811	1.70312e-13	2.18067e-09
PRELID1	-0.239007	6.21805e-19	7.96283e-15		ZNF280D	-0.136301	7.11725e-14	9.11648e-10		NDUFA11	-0.215974	2.16839e-12	2.77641e-08
TPX2	-0.2391	2.86228e-07	0.00366544		MGP	-0.136362	8.40731e-20	1.07689e-15		WDR54	-0.216438	9.21659e-12	1.18009e-07
C12orf57	-0.239564	9.7126e-26	1.2438e-21		RPL24	-0.137179	1.05361e-10	1.34957e-06		ATP5L	-0.216559	4.58355e-19	5.86877e-15
PHF14	-0.240143	1.15208e-19	1.47535e-15		PSMA1	-0.137781	6.88611e-07	0.00882041		MRPL23	-0.217457	1.10426e-20	1.41389e-16
CCT8	-0.240683	3.33238e-23	4.26745e-19		SSR4	-0.13852	1.70954e-07	0.00218975		RPS13	-0.217937	3.68768e-20	4.7217e-16
PFDN5	-0.241079	1.01327e-26	1.29759e-22		COX7A2L	-0.138976	1.57888e-07	0.00202239		EIF3K	-0.21868	3.88402e-16	4.9731e-12
CLTA	-0.24126	4.37407e-26	5.60143e-22		MYL6	-0.139012	8.85128e-09	0.000113376		TRIM28	-0.218839	2.82334e-12	3.61501e-08
MRPL1	-0.241361	5.05198e-28	6.46956e-24		NDUFS5	-0.13909	1.40258e-12	1.79657e-08		NPTX1	-0.218892	8.61083e-16	1.10253e-11
MTHFD2	-0.242706	3.2618e-22	4.17707e-18		NEDD8	-0.139192	7.97756e-08	0.00102185		ATP5C1	-0.219167	3.43522e-17	4.39846e-13
LSM3	-0.242917	7.13238e-20	9.13373e-16		DNAJA1	-0.139839	1.64353e-07	0.0021052		SDHC	-0.219587	1.19779e-13	1.53365e-09
ANP32A	-0.244119	6.47886e-20	8.29682e-16		UBL5	-0.141608	1.29419e-07	0.00165773		MAPRE1	-0.219766	4.02264e-13	5.15059e-09
PSMC3	-0.244379	1.10666e-20	1.41719e-16		TCEB2	-0.144848	8.89579e-08	0.00113946		FIBP	-0.219829	1.42589e-12	1.82571e-08
SMDT1	-0.244816	1.73404e-19	2.22061e-15		ATP5J2	-0.14509	1.46085e-07	0.00187121		ZFAND6	-0.220082	3.31062e-13	4.23892e-09
ZC3H15	-0.247408	2.19748e-21	2.81409e-17		PLCG2	-0.146008	7.61138e-07	0.00974942		RBX1	-0.220387	1.9546e-15	2.50267e-11
ADH5	-0.24744	1.11194e-21	1.42395e-17		PSMD5-AS1	-0.146739	2.79128e-23	3.57535e-19		SMAP1	-0.220699	3.4102e-14	4.36642e-10
MRPL21	-0.247656	4.44043e-23	5.68641e-19		DUSP14	-0.149363	3.44232e-07	0.00440927		RPLP1	-0.220721	1.47781e-19	1.89219e-15
MDH1	-0.247672	1.93496e-18	2.47791e-14		RP11-706O15.5	-0.150765	5.34052e-30	6.84067e-26		NDUFB5	-0.221346	3.67038e-14	4.69955e-10
ASRGL1	-0.248203	2.11008e-21	2.70217e-17		COL9A3	-0.150879	4.83009e-09	6.18687e-05		CXXC5	-0.222421	5.95725e-12	7.62766e-08
GPX1	-0.248434	3.39577e-22	4.34862e-18		LINC00667	-0.152191	3.39578e-08	0.000434965		BRK1	-0.222541	8.06842e-20	1.03308e-15
GNAI2	-0.248808	2.19157e-21	2.80653e-17		YBX1	-0.152254	4.61515e-12	5.91155e-08		NME1	-0.223344	9.57402e-15	1.22586e-10
PAFAH1B3	-0.249196	2.30515e-22	2.95198e-18		LDHB	-0.152558	1.56297e-13	2.00201e-09		C9orf16	-0.22374	5.99911e-16	7.68127e-12
TAX1BP1	-0.249301	7.84884e-20	1.00512e-15		BEX5	-0.152748	4.33191e-09	5.54874e-05		AKIRIN1	-0.22412	5.27221e-14	6.75054e-10
DPY30	-0.249889	3.38996e-21	4.34119e-17		RPLP0	-0.153662	6.74583e-12	8.64073e-08		CELF2	-0.224671	1.12534e-14	1.44089e-10
RDX	-0.250415	3.1562e-20	4.04183e-16		EIF3H	-0.153674	1.14997e-07	0.001473		NME4	-0.225117	2.24517e-13	2.87471e-09
EBPL	-0.252088	5.89394e-21	7.54778e-17		COX6A1	-0.154715	6.00481e-08	0.000769157		RPL36	-0.225735	2.10907e-16	2.70046e-12
HDAC2	-0.252624	1.07734e-23	1.37964e-19		TSPAN4	-0.155902	1.90591e-11	2.44128e-07		TRAPPC4	-0.226022	2.74379e-14	3.51315e-10
NDUFV2	-0.254299	1.52662e-23	1.95499e-19		THUMPD3	-0.161373	5.48366e-09	7.02401e-05		MRPL57	-0.226419	4.51881e-14	5.78588e-10
SMARCB1	-0.254309	6.63703e-22	8.49938e-18		PSMB5	-0.162257	5.61296e-09	7.18963e-05		TUBA1B	-0.226677	3.98248e-20	5.09917e-16
2007-09-01	-0.254335	1.8048e-19	2.31123e-15		SNCB	-0.163223	4.34728e-12	5.56843e-08		RPL5	-0.227537	1.02693e-25	1.31488e-21
CCT5	-0.25806	2.70277e-23	3.46117e-19		ATPIF1	-0.163839	2.80128e-07	0.00358816		FAM184B	-0.227625	4.99204e-48	6.39181e-44
MRPL13	-0.258973	5.44695e-25	6.97537e-21		NCL	-0.164138	2.46402e-08	0.000315616		GCSH	-0.228137	5.80597e-14	7.43396e-10
GLRX3	-0.25898	1.37679e-23	1.76312e-19		SUMO1	-0.1647	9.17599e-11	1.17535e-06		NPM1	-0.228863	1.12858e-21	1.44503e-17
AKIRIN1	-0.259129	1.04226e-23	1.33472e-19		DYNLL1	-0.164932	6.12634e-07	0.00784723		DBI	-0.229354	1.16169e-13	1.48743e-09
TPRKB	-0.25913	4.30408e-24	5.5118e-20		CYC1	-0.164984	1.62216e-07	0.00207783		LAGE3	-0.229968	3.8179e-14	4.88844e-10
CENPU	-0.26202	3.83481e-21	4.91085e-17		UQCR10	-0.165586	5.21925e-09	6.68533e-05		NDUFA2	-0.230634	7.33108e-15	9.38672e-11
ANAPC16	-0.262035	3.03967e-22	3.8926e-18		NDUFB7	-0.165754	1.25914e-07	0.00161283		RPS3	-0.231079	8.35375e-24	1.06961e-19
MRPL51	-0.262037	1.42901e-23	1.82999e-19		WNT7B	-0.166604	3.98073e-11	5.09891e-07		RAN	-0.232184	3.07577e-21	3.93822e-17
SUMO1	-0.262105	1.27613e-28	1.63421e-24		EIF3I	-0.166981	6.29291e-07	0.00806059		GUK1	-0.233811	4.12871e-20	5.2864e-16
PMAIP1	-0.263487	3.27503e-45	4.19401e-41		TALDO1	-0.167032	1.34188e-07	0.00171882		GNG3	-0.233908	1.0335e-12	1.32329e-08
C14orf166	-0.263603	3.38963e-33	4.34075e-29		ACP1	-0.167283	6.91424e-07	0.00885644		CD99	-0.233953	2.23463e-22	2.86122e-18
PDCD5	-0.265378	2.93778e-24	3.76212e-20		ZNF593	-0.167645	4.17936e-09	5.35335e-05		VDAC2	-0.234002	4.74578e-20	6.07649e-16
RPLP0	-0.265605	5.54484e-57	7.10073e-53		LYRM4	-0.168581	7.41737e-07	0.00950091		SUCLG1	-0.235355	1.44136e-14	1.84551e-10
ID1	-0.265729	1.17366e-26	1.50298e-22		CTA-29F11.1	-0.168644	3.7822e-07	0.00484462		LMO4	-0.235459	4.17387e-09	5.34423e-05
C11orf58	-0.265912	1.97454e-27	2.5286e-23		RAB2A	-0.169282	2.39103e-08	0.000306267		ABRACL	-0.235522	5.6605e-13	7.2477e-09
NSA2	-0.268218	9.51971e-24	1.21909e-19		STMN1	-0.169715	7.75656e-09	9.93538e-05		NDUFS5	-0.235757	8.4509e-23	1.08205e-18
COMT	-0.269573	1.07439e-76	1.37587e-72		YPEL3	-0.170121	2.59202e-07	0.00332012		HMGN1	-0.23588	2.57998e-21	3.30341e-17
COX5A	-0.270669	6.62431e-31	8.48309e-27		NUDT14	-0.170472	4.00058e-14	5.12434e-10		COX7A2	-0.235989	1.82709e-27	2.3394e-23
HNRNPM	-0.273641	1.57543e-20	2.0175e-16		MAPRE1	-0.172878	3.62614e-07	0.00464472		RPS11	-0.236041	1.71326e-20	2.19366e-16
CAMK2N1	-0.275538	4.17947e-31	5.35223e-27		RPS3A	-0.172916	2.23713e-19	2.86554e-15		FAM213A	-0.236225	2.02246e-14	2.58956e-10
HLA-B	-0.277374	1.37045e-43	1.755e-39		MMADHC	-0.173427	4.31509e-07	0.00552719		PTPRZ1	-0.23628	9.71258e-12	1.2436e-07
EVL	-0.277915	3.25033e-28	4.16238e-24		HSP90AB1	-0.173901	1.69624e-08	0.000217271		RPL13	-0.236553	1.82377e-26	2.33515e-22
HSP90AB1	-0.280935	3.98324e-40	5.10094e-36		FAM210B	-0.174902	6.85535e-11	8.78101e-07		MDK	-0.23672	6.50037e-22	8.32308e-18
TXNL1	-0.281833	2.83332e-25	3.62835e-21		HNRNPC	-0.175238	4.58368e-13	5.87124e-09		TCEAL2	-0.237407	8.64456e-14	1.10685e-09
RPA3	-0.28189	2.56879e-23	3.28959e-19		RPS27A	-0.175626	6.24649e-16	8.00113e-12		RPL7A	-0.239391	2.43527e-24	3.11812e-20
CFDP1	-0.283359	1.05268e-28	1.34806e-24		VBP1	-0.176046	2.25924e-07	0.00289386		NDUFA8	-0.240088	7.24424e-16	9.27553e-12
ASNS	-0.285273	9.44374e-29	1.20937e-24		TMA7	-0.176666	7.41202e-10	9.49406e-06		PSD3	-0.240172	2.78199e-11	3.56206e-07
NPM1	-0.286431	1.11592e-46	1.42904e-42		FKBP3	-0.176936	6.5952e-09	8.4478e-05		DNAJA1	-0.240245	4.20978e-19	5.3902e-15
FABP7	-0.28738	2.96496e-15	3.79692e-11		ODC1	-0.177142	8.4478e-09	0.000108208		RPLP0	-0.240631	1.98492e-24	2.54149e-20
HINT1	-0.287704	5.90304e-65	7.55943e-61		C14orf166	-0.177598	2.54175e-10	3.25573e-06		CCDC28B	-0.240704	7.8371e-15	1.00346e-10
DYNLT1	-0.28824	1.72349e-30	2.20711e-26		RPL15	-0.178219	2.62651e-23	3.3643e-19		NACA	-0.241214	8.91074e-29	1.14093e-24
PHPT1	-0.289273	2.88766e-30	3.69794e-26		TCEB1	-0.179094	1.35872e-08	0.000174038		EDF1	-0.241227	2.27225e-20	2.90939e-16
SPCS1	-0.289503	2.89119e-33	3.70245e-29		TMEM50A	-0.180145	2.79512e-08	0.000358027		ATP5J2	-0.242015	5.03046e-17	6.441e-13
DCXR	-0.28971	1.11361e-21	1.42609e-17		GTF3C6	-0.181366	7.73571e-08	0.000990866		VIM	-0.242496	4.67461e-10	5.98537e-06
GADD45GIP1	-0.291935	1.93877e-28	2.48279e-24		NACA	-0.181416	6.86407e-19	8.79218e-15		TMEM147	-0.242499	4.4986e-16	5.76001e-12
NDUFB11	-0.294304	1.61648e-38	2.07007e-34		SEC61G	-0.181487	6.48247e-08	0.000830339		CITED2	-0.243336	8.74011e-12	1.11908e-07
LUC7L3	-0.294676	1.20329e-28	1.54094e-24		NXPH4	-0.181796	2.97033e-08	0.000380469		KIF3B	-0.244248	1.74943e-18	2.23997e-14
ATP5O	-0.295098	1.45669e-38	1.86543e-34		CISD1	-0.182333	7.6683e-07	0.00982233		EBPL	-0.245034	2.51848e-14	3.22467e-10
HNRNPU	-0.295839	1.64784e-29	2.11022e-25		PSMD8	-0.182495	2.05182e-10	2.62818e-06		TMEM126A	-0.245661	1.20229e-17	1.53941e-13
HES4	-0.295854	2.24244e-21	2.87168e-17		SNRPC	-0.184808	1.34924e-07	0.00172824		MTCH2	-0.246763	4.7781e-15	6.11788e-11
ITGB1BP1	-0.296164	4.95405e-28	6.34415e-24		DCTN3	-0.184818	3.05785e-08	0.00039168		RUNDC3A	-0.249359	6.34431e-16	8.12325e-12
POLR2L	-0.296688	4.69473e-29	6.01207e-25		MRPL13	-0.184941	2.74883e-07	0.00352098		DPY30	-0.250177	1.50064e-16	1.92142e-12
ARPC2	-0.296883	5.90359e-34	7.56014e-30		COX4I1	-0.185653	9.88372e-18	1.26601e-13		PSMB5	-0.250667	2.92345e-21	3.74319e-17
PTTG1	-0.29914	4.3154e-07	0.0055263		RAB11A	-0.186575	7.65965e-08	0.000981124		RAC3	-0.250942	4.6954e-15	6.01199e-11
RPS2	-0.30035	7.01281e-80	8.9806e-76		EDF1	-0.186792	4.46341e-13	5.71718e-09		HES4	-0.251175	1.26586e-16	1.62081e-12
XRCC5	-0.30071	2.32269e-30	2.97443e-26		BSG	-0.187242	1.48554e-09	1.90283e-05		NAPRT	-0.252011	7.68241e-25	9.83656e-21
MYO10	-0.302256	6.52433e-26	8.35505e-22		GPX1	-0.187472	1.1984e-09	1.53503e-05		NCL	-0.252207	8.35396e-16	1.06964e-11
ANP32E	-0.304113	7.63832e-21	9.78163e-17		EMC6	-0.187644	3.36039e-07	0.00430432		COMT	-0.252262	2.92521e-53	3.74544e-49
TPR	-0.304205	2.50164e-28	3.2036e-24		RPL18A	-0.187787	4.71545e-19	6.04003e-15		BTF3	-0.253003	2.27815e-22	2.91694e-18
BRI3	-0.304978	1.44256e-31	1.84734e-27		TCEAL5	-0.188842	4.52595e-18	5.79729e-14		FLOT1	-0.25471	8.15525e-17	1.0442e-12
CSTB	-0.305733	1.60026e-31	2.04929e-27		C9orf16	-0.191444	1.80472e-08	0.000231166		SAP18	-0.254866	3.09952e-22	3.96862e-18
MPPED2	-0.307818	4.58416e-27	5.87047e-23		MRPL41	-0.191513	1.14562e-07	0.00146743		MRPL51	-0.255299	3.24682e-19	4.15723e-15
PSMC5	-0.312453	1.2366e-33	1.5836e-29		EEF1A2	-0.1917	2.67756e-15	3.42968e-11		SPCS1	-0.256667	1.31413e-19	1.68261e-15
GABPB1-AS1	-0.319135	4.75371e-28	6.0876e-24		EIF4A2	-0.192074	3.47925e-10	4.45657e-06		KIF5B	-0.25686	2.54736e-23	3.26164e-19
LDHB	-0.319215	7.51035e-77	9.61776e-73		SEPW1	-0.192358	3.10622e-08	0.000397876		SUMO1	-0.256958	2.48555e-20	3.1825e-16
SF3B6	-0.319757	1.88738e-35	2.41697e-31		PAPOLA	-0.192372	4.46086e-08	0.000571392		GNB2L1	-0.256986	1.17185e-28	1.50044e-24
NDUFA4	-0.32173	3.5709e-64	4.57289e-60		TMEM147	-0.193322	6.07472e-08	0.000778111		ITGB1BP1	-0.259214	6.27617e-17	8.036e-13
DDX3Y	-0.322079	2.69069e-119	3.44569e-115		TXNDC17	-0.194653	8.91097e-08	0.00114141		H3F3A	-0.259337	3.02817e-35	3.87727e-31
CD99	-0.323042	1.37558e-29	1.76156e-25		ID3	-0.194698	6.74857e-15	8.64424e-11		SSTR2	-0.260251	1.32257e-10	1.69342e-06
PSMA4	-0.324587	9.97608e-34	1.27754e-29		MRPL51	-0.195296	7.69011e-10	9.85026e-06		NSA2	-0.260608	1.08948e-17	1.39497e-13
H2AFV	-0.324595	4.07438e-28	5.21765e-24		SSB	-0.195366	1.03092e-09	1.3205e-05		PARK7	-0.260648	3.89454e-23	4.98657e-19
SSB	-0.330497	1.49969e-40	1.9205e-36		ZNF428	-0.195628	2.10458e-11	2.69576e-07		BHLHE22	-0.260679	1.10451e-10	1.41421e-06
PEG3	-0.331483	1.32649e-115	1.6987e-111		HIST2H2BE	-0.195765	3.16545e-08	0.000405463		RPL10	-0.261147	1.05e-31	1.34443e-27
CCT6A	-0.336532	6.01773e-41	7.7063e-37		PPDPF	-0.196179	4.63826e-11	5.94115e-07		UQCRB	-0.261635	1.12109e-23	1.43545e-19
LHX2	-0.336787	3.02019e-33	3.86766e-29		NFIB	-0.197229	1.26642e-07	0.00162216		CNIH1	-0.262166	4.5868e-15	5.87294e-11
ID3	-0.337811	2.9069e-43	3.72258e-39		TCEAL2	-0.198698	6.15544e-08	0.00078845		RPL8	-0.263443	8.20988e-34	1.05119e-29
TALDO1	-0.338012	6.64203e-38	8.50578e-34		SLC25A4	-0.199239	8.21441e-08	0.00105218		LDHB	-0.263458	5.39002e-34	6.90138e-30
PSMB6	-0.338336	6.69272e-40	8.5707e-36		ID1	-0.199612	9.20058e-13	1.1785e-08		NDUFAB1	-0.263936	2.33447e-23	2.98905e-19
ATP5J	-0.340622	4.47763e-49	5.73405e-45		ACAA2	-0.200006	8.19759e-10	1.05003e-05		DDX3Y	-0.265807	1.56895e-60	2.00888e-56
ID4	-0.340721	2.00182e-36	2.56354e-32		C11orf58	-0.200068	5.77423e-11	7.39621e-07		NDUFB7	-0.266277	2.99487e-21	3.83463e-17
CENPF	-0.342763	2.86408e-11	3.66774e-07		FAM89B	-0.200368	5.59898e-07	0.00717173		MFF	-0.267335	1.03197e-18	1.32134e-14
EID1	-0.34282	2.78308e-55	3.56401e-51		PSMA3	-0.200705	1.13336e-08	0.000145172		HLA-B	-0.268132	1.5887e-29	2.03417e-25
SSBP1	-0.343735	4.45918e-45	5.71043e-41		FAM184B	-0.202321	2.52166e-33	3.22999e-29		COMMD3	-0.270642	4.97282e-18	6.3672e-14
TRIM28	-0.34395	3.23301e-34	4.1402e-30		NARS	-0.203036	1.66938e-07	0.00213831		C7orf73	-0.271191	5.08532e-19	6.51125e-15
GARS	-0.344794	2.26922e-42	2.90597e-38		SEC61B	-0.203742	6.07333e-12	7.77933e-08		PGK1	-0.273254	3.02626e-11	3.87482e-07
CCND1	-0.350608	2.05942e-35	2.6373e-31		SUCLG1	-0.203777	4.01775e-08	0.000514634		MYL6	-0.273304	4.30289e-19	5.50942e-15
C7orf73	-0.351023	3.17095e-39	4.06071e-35		TTC9B	-0.204483	3.60535e-07	0.0046181		NDUFC2	-0.275583	2.11049e-27	2.70228e-23
ACAA2	-0.351024	6.54908e-45	8.38676e-41		COX5A	-0.204843	1.35464e-15	1.73516e-11		NUTF2	-0.27634	7.96286e-23	1.01956e-18
ERH	-0.356296	8.81507e-56	1.12886e-51		PEBP1	-0.206183	1.67989e-18	2.15177e-14		STMN1	-0.277734	1.27205e-50	1.62873e-46
MARCKSL1	-0.356397	5.28328e-62	6.76577e-58		ATP5H	-0.206656	1.5966e-10	2.04509e-06		MMADHC	-0.278895	5.1458e-20	6.58868e-16
NUTF2	-0.359212	2.75064e-50	3.52247e-46		OAZ1	-0.207794	1.0416e-11	1.33419e-07		FEZF2	-0.279206	2.14701e-12	2.74903e-08
RPS26	-0.359947	3.08603e-07	0.00395197		TMED9	-0.208311	1.37049e-08	0.000175547		NHP2	-0.279727	6.38485e-20	8.17516e-16
RALY	-0.361289	2.06396e-39	2.64311e-35		ERP29	-0.208798	5.48753e-09	7.02898e-05		SUB1	-0.283465	7.7318e-24	9.89979e-20
LSM5	-0.364229	6.30167e-32	8.06992e-28		ATP6V1G2	-0.209805	2.9054e-07	0.00372153		NKAIN4	-0.283506	2.0551e-39	2.63135e-35
GTF3C6	-0.368026	6.86008e-42	8.78502e-38		DPY30	-0.210002	2.60975e-10	3.34283e-06		PARP1	-0.283911	1.71367e-19	2.19419e-15
GGH	-0.368368	2.06817e-40	2.6485e-36		KLHDC2	-0.210651	1.46094e-08	0.000187131		ATP6V0B	-0.284316	7.16814e-25	9.17808e-21
COMMD7	-0.374901	1.47407e-49	1.8877e-45		EVL	-0.210809	4.56511e-07	0.00584745		RPL11	-0.284358	4.16466e-43	5.33243e-39
PSAT1	-0.377204	3.82421e-33	4.89728e-29		NFIX	-0.211101	9.99126e-18	1.27978e-13		CISD1	-0.284801	5.22861e-20	6.69471e-16
SNX3	-0.379163	6.93218e-50	8.87735e-46		COMMD3	-0.211604	6.25061e-09	8.00641e-05		TXNDC17	-0.284826	9.53795e-20	1.22124e-15
TBCB	-0.379833	7.78462e-47	9.96898e-43		AKIRIN1	-0.21242	2.21577e-09	2.83818e-05		MAD2L2	-0.286444	2.62002e-21	3.35468e-17
PSMA7	-0.382039	4.98138e-58	6.37915e-54		HEBP2	-0.212625	1.87215e-09	2.39803e-05		GPX4	-0.287438	5.57887e-23	7.14319e-19
DYNLRB1	-0.383063	2.93876e-50	3.76338e-46		UCHL1	-0.213061	2.22537e-09	2.85048e-05		C14orf166	-0.287439	3.65166e-22	4.67559e-18
PHGDH	-0.387481	7.2379e-36	9.26886e-32		NDUFA12	-0.21484	1.932e-11	2.47469e-07		NDUFAF3	-0.287533	2.29373e-20	2.93689e-16
HNRNPD	-0.388657	5.67763e-45	7.27078e-41		ATP5G3	-0.215603	1.40119e-15	1.79479e-11		ARG2	-0.287713	1.17485e-17	1.50427e-13
THOC7	-0.391466	2.4708e-49	3.1641e-45		RAC1	-0.215952	6.22452e-14	7.97299e-10		CALM2	-0.288174	3.1431e-37	4.02442e-33
IER2	-0.391914	1.25863e-36	1.6118e-32		TCEAL4	-0.216982	4.13341e-10	5.29449e-06		ANAPC11	-0.28821	2.9239e-24	3.74376e-20
H3F3A	-0.39845	2.31201e-140	2.96076e-136		C7orf73	-0.217132	1.61107e-10	2.06362e-06		AK1	-0.288371	3.85286e-22	4.9332e-18
EIF3E	-0.399298	3.12337e-69	3.99979e-65		RPS18	-0.21809	2.41484e-23	3.09317e-19		ARPC3	-0.288508	1.1856e-23	1.51805e-19
NDUFC2	-0.399697	2.04838e-54	2.62315e-50		CUTA	-0.218104	6.49753e-12	8.32269e-08		RAB26	-0.288568	1.07986e-26	1.38266e-22
H2AFZ	-0.406189	6.26077e-40	8.01754e-36		UQCRC2	-0.218196	2.03951e-13	2.61241e-09		RABAC1	-0.291446	1.50777e-21	1.93055e-17
FKBP3	-0.408226	1.17616e-49	1.50619e-45		RSL24D1	-0.218707	2.46245e-11	3.15415e-07		RPS7	-0.291838	8.64127e-38	1.10643e-33
SYNE2	-0.408635	7.26456e-49	9.30299e-45		ATP5L	-0.218951	1.95677e-17	2.50643e-13		ATP5G2	-0.292314	6.52681e-29	8.35693e-25
NKAIN4	-0.408877	7.94974e-64	1.01804e-59		ATP5F1	-0.219121	1.0584e-12	1.35571e-08		ATP6V0E1	-0.292653	4.36556e-23	5.58967e-19
SRP14	-0.431942	4.04039e-98	5.17412e-94		GABPB1-AS1	-0.21917	1.14606e-08	0.000146799		PFDN5	-0.294226	2.24629e-26	2.87616e-22
NCL	-0.432736	3.13336e-52	4.01258e-48		TPI1	-0.219387	2.95128e-10	3.78029e-06		PPDPF	-0.294337	2.524e-22	3.23173e-18
STMN1	-0.435661	1.31542e-39	1.68453e-35		WRB	-0.219938	1.21186e-09	1.55227e-05		RPL7	-0.294635	4.75975e-39	6.09439e-35
SET	-0.440142	2.63166e-76	3.37011e-72		THOC7	-0.220396	2.58258e-10	3.30803e-06		YBX1	-0.294964	1.19682e-44	1.5324e-40
DOK5	-0.445832	1.01512e-48	1.29996e-44		CIRBP	-0.221172	2.02795e-15	2.5976e-11		MIF	-0.295076	2.51696e-20	3.22272e-16
FTL	-0.455569	1.90247e-58	2.4363e-54		UBE2B	-0.221207	2.75617e-09	3.53038e-05		CALB2	-0.295621	1.67515e-12	2.14486e-08
ANP32B	-0.46369	1.12319e-55	1.43836e-51		PSMB6	-0.222144	9.13602e-14	1.17023e-09		ZEB2	-0.296806	4.93619e-17	6.32029e-13
RPL12	-0.46838	1.80772e-128	2.31496e-124		SSBP1	-0.222587	8.93406e-13	1.14436e-08		FAM89B	-0.297245	1.59631e-22	2.04392e-18
CPNE3	-0.471115	1.0543e-61	1.35013e-57		BTF3	-0.225604	5.49042e-17	7.03268e-13		BRI3	-0.297569	2.89591e-25	3.70793e-21
CD81	-0.483412	6.26156e-84	8.01856e-80		EBPL	-0.226815	2.76905e-10	3.54688e-06		THOC7	-0.297798	2.43407e-22	3.11658e-18
HMGB1	-0.484603	2.70829e-61	3.46823e-57		CHCHD10	-0.227184	7.20228e-20	9.2254e-16		LSM3	-0.298813	3.79617e-24	4.86061e-20
CKB	-0.488583	1.23981e-97	1.58769e-93		CLTA	-0.22745	8.7672e-15	1.12299e-10		RPS20	-0.298882	2.09908e-30	2.68766e-26
HMGN1	-0.492259	9.61645e-102	1.23148e-97		VDAC2	-0.228022	4.21722e-14	5.40184e-10		WRB	-0.29933	2.86804e-22	3.67223e-18
TUBA1B	-0.504586	8.39278e-38	1.07478e-33		CCNI	-0.228306	7.45676e-15	9.55136e-11		SSBP1	-0.300135	8.2529e-25	1.0567e-20
HMGN3	-0.514639	1.78507e-86	2.28596e-82		TSG101	-0.228667	1.2572e-10	1.61035e-06		C4orf48	-0.300147	2.55025e-30	3.26534e-26
RPS27L	-0.527364	3.38082e-79	4.32948e-75		SVIP	-0.230122	6.10241e-11	7.81658e-07		SEC61B	-0.300281	2.55495e-26	3.27136e-22
ESD	-0.58843	2.99792e-95	3.83914e-91		MCTS1	-0.230725	1.54776e-10	1.98253e-06		VBP1	-0.300831	3.22566e-24	4.13014e-20
H1F0	-0.602294	1.22842e-78	1.57312e-74		CHMP5	-0.231325	3.48924e-11	4.46937e-07		POMP	-0.301721	1.90113e-27	2.4342e-23
CHMP4B	-0.607472	5.48803e-99	7.02797e-95		SAP18	-0.231547	1.11042e-13	1.42234e-09		LAMTOR5	-0.302916	1.66008e-27	2.12557e-23
ODC1	-0.638379	1.30991e-108	1.67747e-104		ARPC2	-0.231775	3.75285e-14	4.80703e-10		TCF4	-0.304368	7.955e-17	1.01856e-12
CALM1	-0.645111	1.15873e-108	1.48387e-104		SNU13	-0.232784	6.02538e-12	7.71791e-08		UQCC2	-0.30526	1.21595e-22	1.5569e-18
PPDPF	-0.648682	1.88755e-122	2.4172e-118		SUB1	-0.234146	1.16417e-15	1.49119e-11		BEX5	-0.309644	5.77907e-21	7.39952e-17
HMGN2	-0.668197	4.54634e-68	5.82204e-64		NPTX1	-0.235343	4.91051e-21	6.28987e-17		COX5B	-0.309645	1.72089e-33	2.20343e-29
EIF1AY	-0.699205	8.05051e-251	1.03095e-246		SH3BGRL3	-0.235389	5.61461e-10	7.19176e-06		PGAM1	-0.310353	1.05903e-21	1.35598e-17
H3F3B	-0.72865	2.59459e-201	3.32263e-197		RPL26L1	-0.23587	3.3637e-11	4.30857e-07		ATP6V1G1	-0.310526	8.08654e-35	1.0354e-30
MDK	-0.733359	4.47795e-108	5.73446e-104		BRK1	-0.236218	1.04242e-18	1.33524e-14		NDUFA5	-0.310979	2.21004e-27	2.82973e-23
EIF2S2	-0.762455	1.38618e-135	1.77514e-131		MRPL21	-0.236884	6.44118e-12	8.25051e-08		MLLT4	-0.312471	7.55698e-23	9.67596e-19
FTH1	-0.85141	0	0		HMGN2	-0.237806	3.70411e-08	0.00047446		MRPL21	-0.313615	8.83404e-26	1.13111e-21
HES5	-0.941558	8.38319e-79	1.07355e-74		HMGN3	-0.239451	2.67511e-09	3.42655e-05		UBE2L6	-0.315515	3.69147e-23	4.72656e-19
TTR	-0.987081	1.72123e-220	2.20421e-216		UBE2V2	-0.239625	4.33184e-13	5.54865e-09		MT-CYB	-0.31568	4.87249e-42	6.23873e-38
					IK	-0.24095	4.36599e-11	5.5924e-07		ARL3	-0.315988	2.19051e-27	2.80473e-23
					CRIP2	-0.242076	4.33987e-10	5.55893e-06		RPS18	-0.318212	1.49974e-44	1.92027e-40
					ATP6V1G1	-0.242223	3.39926e-18	4.35412e-14		CRIP2	-0.319129	6.92558e-22	8.86752e-18
					NUTF2	-0.243203	2.6797e-13	3.43242e-09		RPS3A	-0.319929	2.67916e-55	3.4304e-51
					H3F3A	-0.243481	4.70707e-37	6.02928e-33		TTC3	-0.32051	3.80007e-53	4.86561e-49
					CFDP1	-0.244631	1.58555e-12	2.03094e-08		RPL19	-0.321194	5.21925e-46	6.68273e-42
					PARK7	-0.244656	8.84472e-19	1.13292e-14		GTF2A2	-0.321472	2.27605e-27	2.91425e-23
					ERH	-0.245783	6.07119e-17	7.77659e-13		IFI27L2	-0.322761	8.38155e-27	1.07317e-22
					PDCD5	-0.246301	1.42317e-13	1.82294e-09		H1F0	-0.326891	2.17352e-24	2.78298e-20
					SERF2	-0.246314	2.52137e-21	3.22963e-17		EIF1AY	-0.326934	4.40104e-72	5.63509e-68
					MDH1	-0.247116	2.26807e-11	2.90517e-07		SF3B6	-0.327424	7.73824e-31	9.90805e-27
					NDUFAB1	-0.248193	7.24139e-16	9.2755e-12		HMGN2	-0.328322	2.01106e-24	2.57496e-20
					PRELID1	-0.248516	1.66233e-13	2.12928e-09		NDUFA4	-0.328909	1.72794e-46	2.21245e-42
[truncated: 115 more rows]

## Sheet: Fig.4h
cell number for each cluster as shown in the barplot in Fig 4h.
The order of the clusters in the table resembles the order in the barplot. First is the bRG cluster.
	CTRL	Y366Lfs	E370K
dorsal_1_bRG	135	4	15
dorsal_2	1837	1605	1269
dorsal_3	355	351	196
dorsal_4	400	829	230
dorsal_5	637	1207	511
dorsal_6	823	853	324
ventral_1	202	0	2
ventral_2	380	0	16
ventral_3	38	0	0
ventral_4	1426	1	88
ventral_5	964	2	117
others_1	880	224	932
others_2	1213	123	395

## Sheet: Extended Data Fig. 4j
genes and their respective expression in each of the clusters as shown in the heatmap in Extended data Fig. 4e
	CTRL_RG	Y366Lfs_RG	E370K_RG	CTRL_IP	Y366Lfs_IP	E370K_IP	CTRL_N	Y366Lfs_N	E370K_N
NFIA	0.826076727635461	0.937424013606697	0.739014304401125	157650773137078	146154690702161	152707319675251	144906217993956	184109435330289	184234468766211
KCNQ1OT1	0.474932020373808	0.141133108422579	0.275028871905794	0.754768241054792	0.540638033782256	0.762138390396903	0.990195498801994	0.817102852379936	0.970188269489895
SOX4	196510985243657	17146576732663	168794214554517	334342889961619	294716963922965	315683673683226	400624825062669	369861950812028	375919373904839
CD24	0.779586464022983	0.376381900767844	0.660715981754488	184750866397992	140815880508085	180757410553825	220555370651207	184198606767774	216741250908876
ENC1	0.354446998629683	0.347667007885942	0.32800910501758	0.916183005942471	0.836594650435649	109984675923829	0.966405042982755	0.518125962821476	0.827367990870118
SOX11	128393839702325	102898006173302	112984569566676	25241214056301	183049367356887	216908207725181	22883332285916	161970332985572	197763473541028
GADD45G	0.145011262645496	0.109021735312779	0.105210570607482	125504597463405	0.900473526579406	102837465437855	0.994337315901002	0.736117911666357	0.844616357503134
ACTB	34558460970978	332343461701048	337338992573998	376900759182265	338342087655489	360950525187452	353769726309238	351767946252595	36982479011089
DDX5	199818873648427	169865757189939	195196956604371	239439132984348	195684714139334	219790493651502	230091730520232	206185336769644	221862337812026
MALAT1	634628705906488	629612977856785	614068044935306	621288045634629	654099660246859	614911520698488	675402012297203	652914179216273	637187071721692
TMEM35	0.235988535897984	0.144983879669349	0.162601205522975	0.42110536066213	0.340136192405318	0.379509184377913	113316558622796	0.717659127099297	0.802692567349609
HMP19	0.0265936888613061	0.0177286377626527	0.0146274836678332	0.539168661934412	0.59817049933956	0.581230750211148	167648214694679	135384917754173	149995374015028
SEZ6L2	0.0320707515733532	0.0118495503029569	0.00870844714814696	0.383046886258501	0.340172547508561	0.303922677824555	122806908587892	0.850609062430168	0.982346560282724
NRP2	0.00975209347358686	0.0267747729384343	0.0243541197070371	0.221076083662255	0.221154131790016	0.211071286592942	0.586973735307377	0.217928092178299	0.378499866178734
DCX	0.45032109435397	0.223191185919275	0.187215586651864	141952178823583	0.778360763775433	0.981157462074374	242771563995528	150445418917564	161483153658114
BLCAP	0.343574154144398	0.194706659815474	0.26481707592256	0.471976818549015	0.343253624814444	0.438381503888512	0.823736281397871	0.508779547634758	0.625769825662456
STMN4	104781869433006	0.39387809797613	0.423511201474283	116987120644357	0.609097969153587	0.64094549155422	232962729051343	179252467007301	176738908160987
C11orf96	0.0862926647110075	0.00858940328000592	0.0183308175562758	0.205096209069386	0.035691875257334	0.0544679589008152	0.668925388914588	0.390832042257668	0.37216554403472
TUBB2B	318292186096821	296236108817738	289672922500549	343877399366138	302348312053034	325179293526613	400551006773131	356107583987761	379415383473938
BASP1	236318212191897	218249796981475	228702182007057	261285642849117	220874019026362	262343716490325	323503231209723	287912861385034	317797621402583
TUBB	300298694326816	282023980954867	294275240086424	338078620276151	293605032983209	318410216385692	36967918466821	345695420046808	360190779689331
DUSP1	0.329527143737665	0.267287676025788	0.267639874481866	0.676742167135576	0.433085308172809	0.481439070343907	1065861847719	0.567382450505747	0.569979661420701
SCG5	0.154026479905304	0.0172038516967813	0.031699236280829	0.287560617571057	0.0688779761449244	0.126536306545291	103878529559514	0.212983444746252	0.294266498388279
TCEAL7	0.457129488961149	0.305047893734995	0.35730524190796	0.53520601048128	0.421911666506031	0.461489438948813	0.996498581400341	0.547490821428697	0.668486325301829
MAP1LC3A	0.256811449053897	0.114651141391758	0.0974197425181473	0.39146446402898	0.216233184753359	0.227732450212489	101944519667544	0.511938509942025	0.531356532891459
PAK3	0.457949879247398	0.183813148665912	0.187190996795383	0.841907013367061	0.319463553248109	0.457712176037048	13750641903186	0.590579026140958	0.750075389063085
RAB33A	0.36134906987115	0.0946672511801333	0.126222243324349	0.468276925198508	0.162440845504042	0.235916055308167	0.977229939896134	0.407033593639149	0.484405195476989
RHOB	0.294343166583417	0.173630605115359	0.182809948100944	0.435486252522647	0.209877233137761	0.24477780789932	0.874183522152218	0.386631541384623	0.455043825455268
PIK3R1	0.160882387589798	0.115302449679701	0.125457199927178	0.223258118147311	0.171170758156364	0.209425277070144	0.578067192904213	0.256495150063842	0.441758510571461
RP11-397G17.1	0.00199455189494631	0	0	0.0613377251819344	0	0.0217872638032399	0.439692901461699	0.0106756903513426	0.204897492796323
ARPP21	0.00457937339563562	0.00134350751828543	0.00115655966665117	0.0590503875477128	0.0270153831407043	0.0404144107136232	0.708656722337606	0.287063102482664	0.383653924102238
CALY	0.0615342891402212	0.0371671998106581	0.0510574304587502	0.0605261764599864	0.0448021767768675	0.0541643367985085	0.472592423956183	0.177193235395214	0.222468583353468
FGF13	0.274680876635999	0.114383519398508	0.1536730753362	0.2108076261067	0.127004412723156	0.129527667874186	0.675476856550575	0.369237187322922	0.359090077088886
NAP1L3	0.289572709519729	0.100089098361808	0.141351573963595	0.246204613174385	0.130915055253661	0.174341078828685	0.735602485224758	0.271981063905607	0.388285209757374
LMO3	0.190961888913739	0.0328030295075743	0.0628245892535413	0.114816332655256	0.0196437432770634	0.0524307153437878	128803596383682	0.257192077435873	0.620463582698832
KLF6	0.637649473094743	0.529878955480083	0.453691514499875	0.476178079113347	0.223762001807488	0.268056008774924	0.886040848864596	0.272294555728155	0.263821715936486
JUNB	0.244172152798518	0.275866264219152	0.306919014441923	0.274618914557219	0.248275604634878	0.241149225274182	0.526468641319361	0.2226909199517	0.211551791134962
NR2F2	0.282200994315819	0.0988155280749519	0.345510682464001	0.519895906448645	0.123834792441477	0.472809566430988	0.580765068132083	0.131682418844819	0.384802228096775
TSC22D1	132243028308175	101737873525782	117872011274211	142883843667541	100913976909367	114906182602912	17940725040267	102161115369363	138238186496678
RBM25	0.99621963702384	0.834954652208243	0.947080871322078	111304408037985	0.849881893491456	0.936264321795933	130546386434008	0.980009012798019	106809123698888
OCIAD2	0.307861231655998	0.0586826234193696	0.143296765813488	0.773715569649017	0.179624467871122	0.483222500882837	102790079981055	0.203968422028122	0.629887890424159
FJX1	0.95078996235641	0.521507240143282	0.713341438583029	114390606356381	0.649679745123215	0.89251364131083	12280311697037	0.775815876010803	104650368630759
SYT11	0.560481982816454	0.352310048098841	0.425066461822623	0.643534657285513	0.332501770367113	0.499638088326835	0.7178818221755	0.489664756863123	0.599687671744974
ARF1	127090453652411	0.995863016083101	100908346970717	122482035444432	115928337169412	105051837191001	13446978243037	109942163710889	115841473414062
AP1S2	0.466881755071827	0.413799950221328	0.338638389282834	0.626255945305311	0.403037607547112	0.418009757871576	0.789081762290215	0.347585828330447	0.479203729102537
CLK1	0.460818828877032	0.251853511305098	0.222506351081676	0.651744344073962	0.398834164051343	0.349899533720326	0.688391689634164	0.351564810494243	0.334289820826673
IFRD1	0.572585500960038	0.345963154061811	0.389718583174557	0.675168223739865	0.411273809518363	0.448727725871029	0.713649799202701	0.413517888751451	0.416247912111792
MORF4L2	144051844642246	105279186668495	101471674616551	141067685756549	119416629084996	106622341262811	18683143989416	136007956397269	134359637552587
MVD	0.563076365580468	0.3316448512099	0.356361207803671	0.588155298740318	0.295550699353543	0.379242405873171	0.979029354610031	0.494093967754045	0.572152705119821
LINC00632	0.470778550339743	0.328515308071408	0.330411070235908	0.437207188024769	0.338224698027235	0.354468560087586	0.752091330608037	0.461698947481162	0.460472665597021
JUN	11463030484646	0.599480707644568	0.625209047367821	103623502140798	0.517045657973863	0.465647360562388	21002837781435	0.935174283562792	0.93636617604502
TCEAL1	0.333990856061131	0.130872072555078	0.157219752972728	0.28058751696084	0.105893896928874	0.140768165059573	0.599471896755635	0.296057297837519	0.280599919160531
ACAT2	132650316390651	0.891757450598878	109435574044843	125029438453742	0.731055000982443	0.918918810049597	158519033942669	10941154363523	116492094969596
TAF1D	0.765640254746099	0.456969512731033	0.534842729430084	0.73537596373735	0.536869091919634	0.497744267694531	0.942896445132904	0.574492101328106	0.594357668552423
TXLNG	0.363165140243158	0.174573147997104	0.207603534045489	0.382099203414951	0.190189061010652	0.181605999794505	0.531702520542882	0.201648184816802	0.23298770588114
UBA1	0.65164941170213	0.236340832956949	0.340370273642897	0.707576886378502	0.231701363132235	0.372529449564118	0.867201051785024	0.361325110265578	0.500092028189536
TCEAL8	0.812194575222733	0.586204211256396	0.610075140698005	0.775899353881073	0.561368439404314	0.601214847196829	101074942563686	0.654386893410513	0.730396212164048
USP11	0.923141437243464	0.407887175852664	0.510611286510713	0.988203861819666	0.420127294873237	0.534815710333054	146352569233285	0.615665642537439	0.751520438911649
HMGCR	0.527296004275345	0.255034259696356	0.29787586404647	0.55074846460544	0.283233383988574	0.36056399421226	0.731111162515932	0.337762411858515	0.42366437590252
FAM96B	0.739554701137176	0.796555854017705	0.792726646433363	0.843605050574985	115813496102221	0.992009322587697	101806335854719	128114905382569	131072914361721
PSMA7	14111723519433	161600341125809	175039890223411	164708504583622	20069280814694	198484434313473	173627000096114	205815988140156	210212395532092
SH3BGRL3	0.490818411867374	0.53067082297578	0.58202843390992	0.709653344673614	0.871477935304027	0.876172681394982	0.645923810832579	10414467301024	0.987466016043866
H3F3B	240144543364634	295250082024549	284944115830158	298501678687445	350229008966758	33423844595639	283150639403403	318525998069819	318577134001035
NNAT	0.76754271947926	0.71274962585257	0.862488599944395	100773126535163	139796975003155	183164951525304	0.937365381791158	136426015390193	159085567750928
FTH1	272923905893206	330323119414537	333944154304495	290577230779777	354372842420524	336088799537305	332981906650521	379341250271256	372926892675329
ZC3H15	0.913413399019986	105960577556611	11162921717703	0.862170391689982	114198877848397	109612344463052	113523723985906	127056311353032	12842116685688
POMP	110903616143206	125621378922142	129696362178401	107310542014398	138017299506807	131942485590647	118567815517338	137463069117533	144650930010898
NDUFA4	195145362223229	211882781485166	224348514456068	190810099931491	223480351778086	228910629855783	217171559985149	23723887753316	246963779059822
ATP5J	131129342383372	150505018841114	159993256344745	136324920365733	16664781448846	172973034715029	155615240042435	18266949552184	193812919366122
COX4I1	192618710588717	197417377592565	204676240253142	20101796229864	211142112315413	220796170987865	187565313852573	222236584930449	22746217515014
TTTY15	0.000550397943941363	0.118496970605483	0.141295639400602	0	0.20042146104001	0.22587011967973	0	0.272129972541391	0.336923927711168
SMDT1	0.598126074500463	0.725728454739593	0.820044180472059	0.626756754912954	0.777934033514952	0.886251178393349	0.5780614048774	0.923772449385265	101047731283935
NDUFB9	0.850589762551459	0.962048283663034	104754871932115	0.867623097880467	10719830940557	107289481473315	0.915850084200685	11983298518212	128932940296728
ATP5O	14095875109548	157761166140319	165944828301982	147087491207081	164436603651772	179021604706557	153410877044328	183406884457063	195083476213923
H3F3A	323735758186697	350197826419351	352789034986195	344627849445161	356911712019549	373068979683459	342379328192077	355021407650615	374014999417811
SRP14	204720632208479	237629225381806	230977277756666	208942780536006	236878649700345	241834048212269	213073780733416	236474700303017	245765022152573
ATP5H	0.78167731988158	0.850585790237362	100695328084116	0.731379317913857	0.848936704748036	0.939294800204409	0.831417771611808	11039781642513	121327308715902
LUC7L3	128803882297308	144784025089354	154744598404052	121491092602259	136837531511161	144126708583896	126141964275454	16284709536503	162778902828614
PDCD5	0.772755180395529	0.89480161338058	103350276684086	0.691599996418038	0.836795240220132	0.926598243665504	0.712055313105992	104832233764207	105240109096536
NDUFV2	0.702780487614027	0.865402751224001	0.895976018869306	0.677461694569829	0.824399396944009	0.915022937135875	0.743176246494081	100158866711696	101930833815969
COMMD7	0.372558745684863	0.600281112520085	0.672296691296636	0.329921239843468	0.477390585985949	0.638841079281904	0.416862775204466	0.710921652287514	0.783545480152118
THOC7	0.432617099084277	0.669967781160969	0.746137257105745	0.392899871609807	0.509908040373763	0.635703220090472	0.498173591594597	0.6890321654217	0.744437901012054
FKBP3	0.918197581874536	113643206470471	128146662522372	0.874152643183942	0.93541202442035	115134914867122	0.971333392285578	105620466980355	12253944504876
NDUFC2	12633933029293	147197587062052	162539098185297	131219531483073	145178791437788	163697993973775	142598260280436	155610582560418	177295865869559
HEBP2	0.399103122015512	0.435603367236813	0.575697535877397	0.363617909310528	0.470195861437573	0.613732394365078	0.287231994909366	0.550917021657971	0.680501815902465
GTF3C6	0.570171567954775	0.793780096049308	0.864335645498304	0.591498522510336	0.675513436652325	0.822201422689552	0.560044451212034	0.828322307713954	0.867498128362618
PSMB6	0.995872596663099	117951049985232	129351644890795	0.983961941930321	109863938370435	12368949900691	0.947587544085795	119687286108566	130471747137963
SET	175607752130607	188811024788856	227587118866007	200589728194174	18313573831365	223612321720604	212107449484249	202731362438812	229076828684148
EVL	0.379946139275803	0.401823002453362	0.784449602480262	0.600155629515091	0.570055315482072	11899800062789	0.787051754999266	0.954433396625152	15513193162515
EEF1A2	0.0560123608560057	0.115799275688568	0.265663077122745	0.10186903569777	0.166619982959843	0.406276492122759	0.254665081193941	0.430032305490944	0.970903601871004
FAM162A	0.519949886383569	0.450298601526163	0.416958109862759	0.320616741317431	0.567109255340231	0.336181836723757	0.369767667607985	0.704938454988854	0.46110076536527
SEPT7	161002724877572	186783362621099	168518065745759	134398502528954	164375081004706	15637544351474	156813087066959	187291804334979	177635970431818
FANCL	0.268549607219098	0.303841683896019	0.331722968085927	0.214520522346853	0.262109324151963	0.279926785422191	0.30188281060554	0.620035245453035	0.526241005195268
CHCHD10	0.206177215372359	0.241358639594113	0.282808570440618	0.080089269614959	0.260730748445268	0.179222790531715	0.129094967245969	0.552982352838924	0.41882965796979
WNT7B	0.0322752755537314	0.0300542205955425	0.0766518608043354	0.0923709014571679	0.205918343964162	0.21272003097634	0.163052704688949	0.519641680062062	0.405222814996709
TCEAL5	0.0494898621731572	0.107117353909013	0.12373992096061	0.0635141502625807	0.209871228842306	0.155479488202804	0.182086355977825	0.451149877032579	0.448837253024127
PPP1R1B	0.00400305123134866	0.0272800003848447	0.0237920646059964	0.011960130639012	0.0704026880528266	0.0502472407770927	0.0990393181807674	0.452212940988138	0.378574796102694
CALM1	151136030975912	203634143433419	186195755776948	186764700944392	217937851592468	218799989871251	246243293948245	273755738883962	2655570546791
TBCB	0.706305827779667	0.952117156145682	0.991259944441187	0.766473787849726	0.991863395766381	105517344703661	121957794341072	152701556918157	149082549188624
NDUFB11	124823226240925	138870521285079	153104412789106	1319460802111	143361778140163	16560224779381	157056198085688	185709453904545	196187223054053
COX5A	116166258117979	123696471089661	14886247314523	130489179091828	140398499528933	155487574678555	14645248183736	171143602418754	183664974171214
DYNLRB1	0.85185791435122	109639633557812	114340903834085	0.958368548103441	134554222203427	130976369090072	126275020384967	173286620983623	172025861363362
DYNLT1	0.917644306153328	109776475281736	11418457160659	1077324554942	125232657176028	137908836006633	117628323189641	158755007479061	161080409551377
IGFBP5	0.22313121652131	0.215444076177	0.215378210801513	0.112762755661262	0.225702635972735	0.109512200396462	0.932902860827657	140714546529242	0.754787904535975
THSD7A	0.0992772190037052	0.129394022833242	0.104919716409656	0.252477172394334	0.249999191494366	0.332433480568044	0.99806575354517	136179078874702	124273931408803
TTC9B	0.0190309722382286	0.0252542384908852	0.014499548628516	0.249887645427214	0.40337203689477	0.362046403465755	110624207396506	140672634024938	141860060479218
SNCB	0.0022293867644793	0.0026875332438169	0.00453847655977084	0.0455056334236366	0.164949486703546	0.142763742263854	0.312128569238683	0.597051090966016	0.591500976602678
SEPW1	0.577513928074735	0.548598616386821	0.692426179993755	0.672604008332841	0.763889265031046	0.911805392477307	124087239879942	151177034205243	157812436897433
DYNLL1	165577394771802	184084986592825	179093990462297	177938593997086	189575654777012	188855023020556	226483333751355	269769493232828	245909620354948
FXYD6	111971967282741	115571874207635	113409613083767	116897708262029	111982242155843	122589568460477	181556162575191	215476266121392	193430949326112
CSRP2	0.673973629308954	0.691617131665189	0.825814309091224	0.739628933951883	0.738296390682869	0.888905038555378	186728239385846	229640800877747	210740072264019
NRN1	0.0160824554195086	0.0456447007072275	0.0101347127994818	0.151055743520026	0.557171680584092	0.266260467919265	0.612454636171708	114759529512236	0.764235687107511
NFIB	111289448349652	139103457557539	112563199936069	167454325103066	187521919582265	165019153788086	200577356715024	302714256370029	235278275453595
STMN1	200398487689973	233257624622414	227294067523237	259731689691012	267199854890772	282311150568437	310889891477918	328457129297548	334453309083
ATP6V0B	0.499682784442348	0.554487404873393	0.579987072659687	0.727674242778942	0.993117059939851	101515015703009	12432694484961	141521860774284	15046842523097
ABRACL	0.300899734969907	0.388166117258572	0.42895575649087	0.761915167725817	110598143544594	100485960258701	130647563006987	146553051806988	148047554925471
ZBTB18	0.105835113843777	0.105227087389977	0.0804976842575481	0.374899428874713	0.315594659868058	0.36451606843688	0.698648005894673	106516034094109	0.877965217267887
BCL11B	0.0501617588633205	0.0662839253653311	0.046308528519028	0.262217174319532	0.335710073583104	0.317635901003996	0.505325509402723	0.807046869997446	0.700458894931969
SYT1	0.593362974196416	0.251164540396035	0.341922422005988	113420550125279	100180929931616	101963329878539	196073104756852	233450755401608	21801135083187
STMN2	0.176162548999526	0.228296018055177	0.162598997514966	13653671014086	163131543018282	165363613375983	337465126105765	344575207235962	349779895229137
BCL11A	0.279195670884972	0.342652939355452	0.341838065409166	0.763588882239038	0.856401859674774	0.834287446717279	144084002865692	176983081114702	159857600279862
NEUROD6	0.0355754830280302	0.144832966734285	0.0452982257095455	13957435359657	149616209552797	128162934593353	264269313689716	327061882635311	293803950107699
FTL	253861910403337	29824223991082	269554701220072	266917847722759	333377253609189	294638241424955	236140711737881	275775731120359	267805028128406
TAC3	0.0180097708242292	0.0267773607408261	0.0178405901132222	0.483132932253408	0.973234235014213	0.722144139316349	0.0729906143637476	0.19948334920332	0.218945629216733
TTR	0.0131677660279364	120239141539806	0.0707467011797037	0.0130393183677613	146152135217595	0.10682182511996	0.0196068027073682	111704888260664	0.0914838289979474
H1F0	0.19520578292593	0.87679071086213	0.284995866320937	0.187027946413994	0.737118656064308	0.198440778858381	0.207839655821128	0.53370708603297	0.180156995236136
DDIT4	0.951441715243095	0.874794509545868	0.870985069519373	0.684331080693462	105439089352731	0.754521314483689	0.760366244505011	0.804729671670818	0.598689800587473
BNIP3	102234973725651	10213873761497	0.61995313263804	0.70793989401562	102934350034493	0.710653988605553	0.563391207806834	1024213783887	0.752930810391935
ALDOA	169599242114794	153759402120999	131524940270158	129907500422557	163424392678695	118163976955813	0.98377356483243	141224504919159	114045117839345
IER2	0.677786794154813	0.892122154687053	102055814042608	0.794873692106125	0.808153295166958	0.896587306781427	0.71646986822618	0.524024110563901	0.510182251032808
HES5	0.576677554037286	0.750784585704789	182304975676963	0.620869792065721	0.35996255692214	10796175060127	0.0155883923080952	0.0181726793539571	0.0564623327673042
ANP32B	0.708035774719489	0.949282787530231	112889688048434	0.747685515874188	0.753438968684209	0.856694016892342	0.507892848079329	0.511584160328086	0.52710193829795
SYNE2	147260984177375	178296892744689	172221121507202	126725657512845	11567331521096	136283859067181	0.560706927727935	0.80772020146922	0.760726344261526
DOK5	0.851264017278911	124391624255438	105653481062743	0.610378467469373	0.612402376292406	0.766413461340716	0.257825780883548	0.067478174043191	0.154700378481459
HMGN2	222597280662906	269004173442316	268800242780705	1855891926786	204642228211699	195602817569297	125713683012246	151068493657484	141819486287445
MDK	0.684586571597419	121419398188265	116650755596443	0.462597661243155	0.721883593161676	0.628884505774021	0.108317800638529	0.28791967960267	0.232653584051484
H2AFZ	248926349351398	274802785525804	279908185893982	223779056350019	230958427127764	224239618011294	204272684275413	210931098421476	212719227261099
HMGN3	163872956473866	203800355620032	194265285031422	0.942488098749565	108621052183411	116449176544174	0.69243117911408	0.828298282026159	0.834302434667025
PHGDH	102213091779909	120263040741362	139999927939141	0.582233002760726	0.472785564621187	0.607960097761948	0.210161347556298	0.1389385556027	0.220347748893394
ID4	184034226929535	200119436206267	216996128973644	106388524739099	0.676125683670253	0.971858022838269	0.355242318858988	0.159007916983353	0.28006054545244
CKS2	130271231553947	124678099307952	1170281764641	0.919336977275043	0.669160573249775	0.615076980148764	0.556727801420327	0.315873704850098	0.311686408509454
HES1	181244382627516	147959197029262	153050958282524	100435213470788	0.518920272498122	0.725043885892356	0.0572760108145127	0.0741526464567888	0.0859230904091339
SOX2	221610521653359	198546194323077	200291386955013	0.903528565660534	0.503991380403547	0.552328103184306	0.0365193638768685	0.0404102347061329	0.0287647306266718
ENO1	208110074990489	198012044242107	183691568476411	149481966752904	158454970102378	144025039736898	114546815770232	146459079636317	128653661835143
TPI1	23227774413203	221231886891762	209512170926187	173211684440044	195047265995361	171728023404219	130881003942346	173386047064969	164145033290476
LINC01551	180908042547989	184655994708687	172439755574202	157491517858815	128448859784092	133278194927708	104882586835564	139351193096674	116505605625107
FABP7	299383924817882	345045405093434	287364624325668	195146092334602	191672346243753	181661432400605	0.837799282225391	12136216453456	100621078834112
GSTP1	218712846382638	216835345177673	224745524815427	176962192250842	168668675440495	179515453928954	1225636727301	161084502161423	154775712931091
CARHSP1	103813143304086	116723794118779	0.95342985834036	0.971388086577349	0.913553190794213	0.967315581562294	0.712053713035369	100387849212037	0.95916771733683
RPL12	301930149190371	330318686248673	339454317917141	278695986376283	307280741449507	31373711419266	221248361830064	272692661477911	270296539279888
RPS2	405176700853062	4225068925359	430323689946919	385589456416986	40928610338347	409502159909473	351114541424445	388376575134584	380558834369156
SRI	129285183766382	14651135440638	14348068654635	0.931698752828868	108381111750329	120034216225916	0.425743076962961	0.86891701725559	0.756394343656337
SERF2	188059925620424	200228248224193	202815974778738	15878885796535	172154842434487	185196269199018	121309202504023	15646221928761	164440303652191
GAPDH	339811668139506	338558067310806	346033497882577	318416065647754	325683856488879	327384907838927	225323065681856	295123810600488	287367811640003
RPS6	369414667753688	379812547705982	388893774918652	347274760948674	345861020980639	363102811762139	254050351978753	290489153399524	292547644842099
RPS9	305996890590691	316320308433063	318931525788284	298381595835699	305526515680279	312054994417343	245157904984661	27310164181419	27317710250563
RPS27L	176021594388005	217519115479315	206442190094751	133934829381271	186914749792724	175069987331725	0.449678995258013	0.829414711099838	0.791934072978328
RPS19	400693925892331	415979425700976	417789100926768	391579173695835	418936772549177	413471286328891	33055439027496	360981556851972	356409746708273
NCL	129410055918318	153632302291277	166567446226364	128236010797595	137029871581819	146117552218441	121883067397105	138701592786063	14106298011358
PPDPF	112221995110921	151562713354899	164161195042742	122834354796122	132437222122283	146491765176408	120805846865506	139180180397359	14640021964273
ESD	103407983739542	150473816936575	136404305376887	0.902408071157967	121527851881926	116075671754705	0.759071505768207	124958674654874	120683002614057
EIF1AY	0	0.456545255549395	0.519525278436665	0	0.421079314756593	0.490673173160126	0	0.224262229852851	0.23263367205996
EIF2S2	0.833084010581501	131361639700084	142108415639873	0.723847986641444	123239180328807	111130789649452	0.829598720174843	116926166225458	117932522846706
LSM3	0.910179986276454	104642289317081	111842835470149	0.785392908680766	110934317477296	106563608175579	0.819167638983432	101042012770965	106693040286206
ODC1	115766409070204	148085166144479	174817847766672	141382435039867	14806559578068	167749268120975	115221944265408	135811788582055	150008035607911
POLR2L	0.672141374232073	0.782796398835699	0.995652132715164	0.620754514129306	0.862309197768122	11217208642762	0.485348833442121	0.689570031812024	0.883788098592003
RPS26	216925542755745	234232327269102	251358010691652	224123351517349	242896287318005	261617036915094	195403037476848	23108564637502	243873862747399
HINT1	230039159343614	248174226219112	252223338936575	223618264512756	246600554244444	248587168880931	198828890888147	237575075687823	237132698759395
CSTB	0.875764719115071	110531405449352	106580629201497	0.878594089304907	106993951450549	10878778562823	0.595110016567609	0.973854755826834	0.897134794002651
GPX1	0.844148161815613	0.962512735020292	108314728841213	0.91290184279661	102230427943795	10945735992045	0.472127363934221	0.717720864161721	0.819586446870939
EIF3E	217952217951673	247708512664673	243049905246034	214187144214049	245095063694763	239263626083408	19116192749668	214987951887623	213468284740172
NKAIN4	0.26757682981302	0.51367090605904	0.597291149807335	0.289319848481522	0.477127602578116	0.635007939122057	0.0649728017638243	0.274179579016678	0.228971530205499
HNRNPD	100956923978987	108500033039004	151962667762374	0.939110223076862	0.72005637877951	129308006475643	0.731373676639527	0.75960692261267	110399426861772
CD81	0.172536673160719	0.209838067718543	0.877073044211679	0.0966294747444574	0.132046878292705	0.627177959944133	0.130322464334352	0.229294834843124	0.77835524302108
CYC1	0.857744648250969	0.949020694032165	104685821315494	0.695109668111909	0.773785382248727	0.899311397366051	0.612497498673087	0.896303808472447	0.946350760281349
PHPT1	134208457457731	148339902364008	161603846876082	0.940271458010031	117421520904484	123108838328941	104799922152042	128442484465002	139291990039463
HMGB1	286618725154738	317874876632974	323104766694432	275423173975709	270976061323626	291733867814044	266707589848334	277272356625964	281829992606372
TUBA1B	290754833706302	314276306685687	339941148626643	255194983543423	228911631004041	26298890957873	219731861727462	231938225902742	244421987230604
CKB	308634689199957	343610588804712	341123648202067	264173600620466	264884694135194	279202059707797	244000049141911	269538122171826	281864370691545
CPNE3	0.667830887853713	10117763452186	0.972802514258435	0.645614672372222	0.749199469666057	0.74970915480642	0.477958907735916	0.610521850530239	0.630829280094506
HMGN1	182564009714428	21705631095931	216223791120361	170364299016415	191583018004881	193454542288878	163534031769442	177746972226924	185356834154806
SNX3	12463758539898	154720544178884	146202567889579	0.885524965857299	114510256441608	101625591893295	0.807970416420263	10380547216488	103322162814125
CHMP4B	0.679450415350098	114874248053127	104068410850173	0.459496711803419	0.608858111513644	0.708055436101723	0.494667101605741	0.602651586342805	0.748635608710034
SQLE	162227630995823	109808945507805	112794868590071	145813986302493	0.964308388081604	0.932888325035705	186365620887202	127138737801687	114857207796942
MSMO1	16901347728587	0.895457906814475	0.845516266277124	149551727664493	0.883521046132611	0.744365791178821	178872206667642	0.967526470521661	101517078648821
IDI1	170488868372823	11766883640826	1199890157385	152103911315517	114288006776209	105212459591402	171338783460872	124600566903585	118021781965713
FAM215B	0.560887518679041	0.248599865879317	0.281718630267071	0.58279100788267	0.178166693689774	0.217036028728757	0.541493148223927	0.184629929499852	0.215259677100386
LDLR	0.409400614181113	0.168945752428883	0.198730775540227	0.41418799609633	0.103434646342227	0.157998122389345	0.410623129412761	0.151456655076742	0.17036299414518
FDFT1	195157046059347	139850546453444	142873547034356	199131797194571	150335289853634	144574811213545	206575603459919	157058802616353	156170439405582
CHCHD2	169214085851642	0	0.000371171809525114	162090082300486	0.00105500838628119	0	168425623690323	0	0.00137067533168513
INSIG1	0.802652033405472	0.3602106646265	0.313477320829559	0.754114973172961	0.375752549303547	0.331778544787657	0.848725342069407	0.417216011587506	0.296220154259064
UBB	205601385723073	0.81670547753	0.70549023663018	194791967360778	0.851457107571604	0.734651148542647	218202176464965	0.9896989858396	0.793837732671982
PJA1	0.60043034388103	0.358909524480878	0.442300684485572	0.660914446516514	0.327310081404294	0.427170298233343	0.787962272016761	0.349027725794734	0.432203095389705
DNAJB1	0.519339241403796	0.264944786184543	0.313270506024057	0.588374648037252	0.190094496443675	0.298290033938496	0.812290093349931	0.161312488392289	0.201941317579404
MAP3K13	0.429982185113292	0.0190883170983552	0.138155299912213	0.369488142433765	0.0201032307885034	0.133800711354679	0.474135276947779	0.0460856576128585	0.204823646646803
NOVA1	0.600259964260273	0.297545764780503	0.416411136029945	0.565418722461971	0.229140400151224	0.353493507080037	0.659439466408065	0.282777289674475	0.443979619075669
FDPS	167638647135764	109618295826659	129469095633302	144157111640716	0.917474810415677	107456933855793	158836986098272	106929971385801	116443382265585
DHCR7	0.696506783469133	0.291438782871451	0.370925111938263	0.594591665690809	0.238593241833793	0.278878117947453	0.782515927600568	0.3620022975773	0.399821881431117
HMGCS1	205748145285799	0.99216974816606	11659120166698	171239273143543	0.7680713499794	0.966629314065263	210382424542211	104343462535501	113638752705795
CDK16	0.574065741139318	0.240280366423514	0.321078694216246	0.494245270261922	0.186950630908444	0.270157951619958	0.591388039488201	0.270284413124524	0.316025990418332
PRKCB	0.421787419161624	0.0995405103859906	0.202636991087971	0.146901245059075	0.0199481630320078	0.0417954598540863	0.25047611273684	0.0416822790661873	0.0385927666812219
RBBP7	100034390345397	0.559788532661521	0.620895495689284	0.73659023162522	0.341738800988258	0.374553376410151	0.575660488319162	0.293070567397657	0.299447193034553
WBP5	110443128580231	0.723951324745682	0.77707134813633	0.834755220672612	0.639647304797302	0.619893388118931	0.882455524350124	0.508160558059868	0.522490034011417
TKT	149227520824657	102836509087416	115761767349364	134533386232067	0.983140519210483	104690329941362	129658232778167	110047128717857	117354876898927
SCD	0.990565933478542	0.452505319871063	0.52831592303884	0.736210483231275	0.343291065055271	0.407158094466119	0.757091728326327	0.45668793375975	0.521188446215625
EIF2S3	0.787836328563053	0.370034411472554	0.449348901384421	0.634028652010397	0.287618560665335	0.381591344671386	0.608545709614529	0.273376366861316	0.314141630256439
PLP1	0.43637641795505	0.0439805687488892	0.060406047586513	0.177424923284875	0.0158461497963346	0.0480702139136528	0.207192407004491	0.0122222653671486	0.0380502768402617
TMEM161B-AS1	118164057588043	111592510554938	113056394591223	0.711182264909978	0.680969136827607	0.681789412941204	126135100191926	0.928204562652512	103209979999608
ARL6IP1	106622707001771	110792003110257	100825177993812	0.805433164274032	0.734333960040178	0.792282665236774	110326042639201	0.814257044039884	0.89197346951536
TXNIP	0.889700623235864	0.585268146430442	0.609550797302283	0.477251007212657	0.445428776563557	0.319469335403492	0.799090390050506	0.580095055655175	0.412953317762138
HEY1	111254607521189	0.936665767119229	0.872510893476981	0.949112695020597	0.484998135160461	0.591775563447953	0.988454910824742	0.975719028234489	0.835765562150495
MGST3	14158983519242	0.960088931127058	109594018417076	113108637018414	0.891492268463558	102802800404034	147274835659307	148571088062588	155693267374515
SLF1	0.436737822173099	0.36393118623723	0.449290183089659	0.362061649533397	0.164647742942435	0.301436559063718	0.601499627805558	0.270056668173606	0.474399515798221
MAGED1	0.888242681299071	0.550460824526026	0.660276122336667	0.68348627469692	0.482128602513297	0.587794339946886	0.796130926773442	0.666349621677355	0.776083409709206
NDN	128540579740454	0.828631061602286	109065475077826	0.855869549211574	0.651476336103054	0.852832235035475	110141587936154	0.876447384634068	105703562210796
HES6	0.910859858635034	0.837909080774254	10785947202109	201260098643445	149372782907374	195938984552619	119317797757685	0.855164162712085	114407472841993
DLL1	0.117281814243298	0.0929212582750901	0.1413993354459	0.491075380768811	0.18482811683202	0.33409338235377	0.172154645858757	0.0623909298871873	0.0841462535126144
ZFAS1	195577147548738	189236659912993	209295074198521	213356711929586	201635517989846	206809206473528	198282414250109	167489724156781	178688490383321
TMSB4X	46503082119391	439680463024022	442352865221361	503651293078482	441868440754626	471659377204174	421085223023769	412409426953366	421639485770041
RPS10	213595016624285	147125481550184	199370708175008	201319442375986	134393214705982	18964949913914	149208665249386	116339721108553	145693195424367
RPS21	225133990410168	168500108106165	211045769701379	229625580269024	172880760934578	210580508088333	168284050250234	141405803026803	168639915473768
HNRNPA1	321400006114224	30403205524963	324672617540489	337039512251505	284692834627588	325042201076263	28318312630308	270276959615525	288554914705481
MARCKS	246331430045756	220520297052744	237854915192729	253278324699167	200667037293618	244106695321896	210286214241329	171295144158582	207023446617994
ACTG1	410118525815512	384064880116415	400701779120298	418120379963559	373549662985063	409252116771447	384548188876814	360505741601424	389008985687117
RPL38	265564837997354	216290594123635	247128020575314	271428481028658	231412577682513	257442676492675	25337409711917	224461233700773	242006822042312
RPL37A	361186437735429	315564580866512	342334880804406	360664326963028	320484312312098	347319093789468	338910206090621	31826887954667	32674256477283
RPL36A	179280651066968	114137324190781	157648758914067	17791918439584	113533396957074	154298288518798	15463684300108	10614510579909	129267789845581
HERPUD1	0.59773749525685	0.468203707769117	0.498895404842647	0.776973278056876	0.581594861372948	0.504591129035421	0.721713806762085	0.349606144612708	0.385785981962326
HSPA5	11135826701343	0.616877960831617	0.68178599342198	102885574225276	0.572014218050928	0.664571648842568	0.82847824130202	0.399590089837317	0.50367638204367
CCNL1	0.828552033764038	0.569260969213267	0.603664213724273	0.829445079913598	0.512663525038481	0.578580356517552	0.632644395373683	0.383501549960247	0.430825873195581
TMEM97	104946920672262	0.689950277069977	0.820952344905444	104028116680086	0.566277078463116	0.730681969012529	0.869715360058797	0.384338976587964	0.434118155546295
RPS4X	360054075479239	337315702087023	342359398856801	362248447933148	332603375264231	343174748805917	347343352271575	320637488700504	316863683191682
MT3	0.418526987634148	0.115537875061688	0.170918870132249	0.0714680416256685	0.0379166030527479	0.0325436720098165	0.0229719316811293	0.0323788967401562	0.0155325345404172
FAM107A	0.34876799046138	0.086878136179259	0.0651405392806727	0.0360181211279658	0.00894513346280373	0.0125639757652668	0.0156408731867094	0.00476247116161316	0.00502302598142863
SCRG1	0.416464941246435	0.082664323724972	0.0985020652609715	0.104114438531599	0.0368828639968594	0.0324934052959724	0.0314273924595976	0.0238522960720019	0.0203571657403637
AMBN	0.381445863529603	0.0503371640634405	0.184728381501684	0.135379384985242	0.0165023361608273	0.0409532266517771	0.00390689470345462	0.00156361848730164	0
MGST1	0.453818171004239	0.081189458126647	0.299700103719509	0.133634093298963	0.0354915220199118	0.0697477292359654	0.131891970017053	0.046406794494589	0.0922076283211782
PEA15	134257610039691	10726353767427	0.982238912473742	0.641535479667525	0.482332861374772	0.409682597287529	0.692727450194822	0.684150397698397	0.612918690128293
PTN	243380919083859	213544970033784	166044605631174	11033067576863	0.628496333958189	0.634268604222557	112208940292913	0.66282801098068	0.704237244194959
GPM6B	159550377210386	125968506803647	116757875318269	102626623931304	0.640416017806971	0.763944851986728	0.862999482097921	0.584726801242878	0.624991585063083
PRDX4	107296579163019	0.704731686254753	0.773957406927571	0.63905367026474	0.455561082240929	0.440694990526072	0.427798137898343	0.325904683534747	0.326536687054419
FGFBP3	216825611689475	113138412591259	127565698444097	102442953653255	0.300388174246553	0.435923946986879	0.463426145053856	0.342620551935162	0.388438019125885
NPC2	0.936507584302797	0.656038014797572	0.683257821235236	0.542884077875865	0.494961860823409	0.456112946820509	0.257580390449458	0.273572442916967	0.254625612324388
IFI44L	0.856543870047869	0.479979097249953	0.732066947151764	0.226337796945503	0.0867906063455009	0.198077792638669	0.00233366034720307	0.00649941551107835	0.00511853135534694
CXCR4	0.841188894229102	0.479114461291992	0.604405781543978	0.265747508067	0.171100342420772	0.210423943818523	0.0254726184188718	0.0283911817120372	0.0185095549187616
IGFBP2	201797422300515	16654270884048	164126959185286	177315089884646	148339249307174	17204271951968	130049062843967	150230623496841	162928514187046
FABP5	16576225998267	126839302961861	149983106754792	126333770764397	0.966075341870451	124793035881577	121394002869712	13623466094864	135790727190261
SFPQ	155933200815458	158196154615936	165922224208811	171669198900788	128548257753494	16652001250267	138431956223773	142630417424557	159295231278673
HNRNPA2B1	221467543333933	220453515279073	228854986655569	204867374685562	168126132484506	203785595302921	190522258451163	183883904606459	195309322545352
RBMX	164759149706726	153768728445481	166355149668149	148041174633176	11310516764408	143154878151454	125379092349441	11838081341088	124031223559136
VCAN	10449747015553	0.907423939698518	104645889402095	0.760672747829354	0.442263105879706	0.633265237777995	0.74485211232217	0.225625118422188	0.46422020766086
HMGB3	122945024790661	109247033144766	119227832024917	117532575982082	0.744734237824935	0.961556956266566	0.977201434241268	0.492344446517493	0.659149268500518
KPNA2	103935009718066	0.945206916540248	10301554754945	0.960642658847581	0.539532497181772	0.76767835643275	0.784523668629311	0.433321479931602	0.613504848226848
MEIS2	150888551440066	129950667821798	115200120890672	11998727545284	0.856532310889467	0.884846222215556	0.907852330939727	0.498609655174097	0.61540988771686
BTG1	187587240720641	179183502109906	16734595867477	185774850912953	158357173770185	156471491652273	130349727881413	0.641548145876275	0.949974648533705
SRSF3	188488543806301	186931291019046	199638343924309	197162903419703	147652292776243	176345652332648	140691588343674	130313624061444	152469844009344
NAP1L1	287727506274942	273776353692226	290609900818223	275448270378757	235358973836878	264443503358373	197977689867965	2014058509154	207391170214499
RPL41	370687641893671	323707472670209	35418556354093	344258008632043	305692352894254	330022403242115	300149107917366	274642464310419	291914104589002
RPL17	109845686905997	0.698681402983714	0.928650644681342	0.912402083275733	0.6070822456756	0.791326589444849	0.626715100897916	0.444457616721961	0.552526997222306
EFNB1	101483336416537	0.602816177531739	0.698321128673396	0.690673233520723	0.252825713568001	0.411441397076494	0.390757967388001	0.107069390806147	0.136978928155543
CCND2	116149861324426	0.790493704111083	0.933654766156371	100568520004594	0.562501671224703	0.733155759015075	0.547504128576688	0.471159625135722	0.435547756795008
EGR1	0.341010122618236	0.40784682927429	0.556564661559663	0.187449235654466	0.127904036661476	0.263459731759688	0.367913823431732	0.0520287444389987	0.0552179661434226
FOS	0.557826065925804	0.493839389012523	0.585427732590124	0.249078533671906	0.149824731850908	0.197259676199309	0.454635876405568	0.0712861273966205	0.0670890587869793
NR2F1	119486879749542	0.75095312386793	110144057209291	12112271062522	0.543200436008021	101755020997235	114577384788093	0.439330704668813	0.822355061893221
FUS	154602613521416	140246047938678	167021928978266	152172337292058	108826748042125	14497606033265	141237874394576	113047188264448	133152737123788
TRA2B	11306336293873	105243834504295	121699050927515	111856209017399	0.898686509505934	103957592744048	111267961347099	0.758778642875902	0.947212477591723
