# Supplementary material for: Extracellular LGALS3BP regulates neural progenitor position and relates to human cortical complexity
Source: Nat Commun. 2021 Nov 2;12:6298. doi: 10.1038/s41467-021-26447-w (PMC8564519; doi:10.1038/s41467-021-26447-w)
Supplement: Supplementary file 6 — Supplementary Data 2. [file 41467_2021_26447_MOESM6_ESM.xlsx]

## Sheet: Key
Whole proteome mass spectrometry-based proteomics.
Decreasing abundance of the protein:
Increasing abundance of the protein:

## Sheet: E370K vs CTRL
Significant	Significance	Fold change	Protein IDs	Majority protein IDs	Protein names	Gene names	Score	Intensity	MS/MS count	CTRL_1	CTRL_2	CTRL_3	E370K_1	E370K_2	E370K_3
+	5.23795	-2.21318	A0A024QZP7;P06493;A0A087WZZ9;P06493-2;E5RIU6	A0A024QZP7;P06493;A0A087WZZ9;P06493-2;E5RIU6	Cyclin-dependent kinase 1	CDC2;CDK1	27.681	237310000	34	25.402	25.3181	25.2612	23.0303	23.2206	23.0907
+	3.32646	0.977211	J3KPF9;A0A087X011;E9PES4;Q9Y496;H7C2F6;C9J9X2;Q5JRK0	J3KPF9;A0A087X011;E9PES4;Q9Y496	Kinesin-like protein;Kinesin-like protein KIF3A	KIF3A	25.531	300670000	54	24.332	24.2186	24.2491	25.4069	25.1096	25.2149
+	1.38746	-2.42638	A0A0C4DGH0;Q5ZPR3-4;Q5ZPR3;Q5ZPR3-3;H0YL10;Q5ZPR3-2;H0YK40;H0YK59;H0YN29;H0YLT8;H0YN85	A0A0C4DGH0;Q5ZPR3-4;Q5ZPR3;Q5ZPR3-3;H0YL10;Q5ZPR3-2	CD276 antigen	CD276	51.593	439110000	25	26.2944	25.8962	26.4298	24.1321	24.9563	22.2529
+	1.56401	1.80625	Q5T321;A0A0D9SF28;F5GXV7;Q8NFP9;Q8NFP9-3;A0A3B3IU76	Q5T321;A0A0D9SF28;F5GXV7;Q8NFP9	Neurobeachin	NBEA	65.67	394610000	80	22.9084	24.5151	24.1765	26.0244	25.305	25.6894
+	2.60516	-1.04395	A0A0G2JIS2;Q96KQ7-2;Q96KQ7;A2ABF8;A0A0G2JIR1;A2ABF9;A0A0G2JK64;Q96KQ7-3;A0A0G2JRR0;A0A0G2JRN8	A0A0G2JIS2;Q96KQ7-2;Q96KQ7;A2ABF8;A0A0G2JIR1;A2ABF9;A0A0G2JK64;Q96KQ7-3	Histone-lysine N-methyltransferase EHMT2	EHMT2	29.172	132210000	15	23.8725	24.3169	24.2082	23.0345	22.9914	23.2399
+	2.43685	-1.28078	B5MCA4;P16422;C9JKY3	B5MCA4;P16422	Epithelial cell adhesion molecule	EPCAM	20.721	140970000	20	25.0649	24.5226	24.7008	23.7543	23.363	23.3287
+	2.40851	-1.26882	B9EGQ5;M0QXA7;O95785-4;O95785-3;A0A2R8YFV2;O95785;O95785-2	B9EGQ5;M0QXA7;O95785-4;O95785-3;A0A2R8YFV2;O95785;O95785-2	Protein Wiz	WIZ	10.05	144290000	18	24.7162	24.6112	24.7248	23.1799	23.8313	23.2346
+	2.33097	-2.16447	C9JEH7;P22090	C9JEH7;P22090	40S ribosomal protein S4, Y isoform 1	RPS4Y1	16.64	145120000	14	25.0962	25.0232	25.4705	23.6489	23.0221	22.4256
+	3.76339	2.40119	E9PDG8;O60641-4;O60641;O60641-3;E5RGY9;E5RFC6;E5RK51;E5RIJ5;E5RFU0;E5RHK9;H0YBT2;E5RK53;E5RGP8;E5RJY3;O60641-2	E9PDG8;O60641-4;O60641;O60641-3;E5RGY9;E5RFC6;E5RK51;E5RIJ5	Clathrin coat assembly protein AP180	SNAP91	71.573	588290000	65	23.7196	24.1863	23.8566	26.3723	26.1098	26.4839
+	2.66983	-1.24832	E9PIM6;E9PNQ8;P04216;J3QRJ3	E9PIM6;E9PNQ8;P04216;J3QRJ3	Thy-1 membrane glycoprotein	THY1	4.962	215390000	14	25.0159	24.4575	24.8376	23.6523	23.4656	23.448
+	1.91326	1.56924	H3BLV5;O43602-2;A0A1B0GWD1;O43602;A8K340;A0A1B0GUE1;E7EU50	H3BLV5;O43602-2;A0A1B0GWD1;O43602;A8K340	Neuronal migration protein doublecortin	DCX	152.65	3635300000	131	26.9127	27.7605	27.4092	29.1639	28.402	29.2242
+	2.35546	1.61721	H7BY57;X6RKN2;O94856-4;O94856-12;O94856-10;O94856-3;O94856-8;O94856-11;O94856-6;O94856-9;O94856-7;O94856-13;O94856-5;O94856;O94856-2;D6RBU5;D6RHX4	H7BY57;X6RKN2;O94856-4;O94856-12;O94856-10;O94856-3;O94856-8;O94856-11;O94856-6;O94856-9;O94856-7;O94856-13;O94856-5;O94856;O94856-2	Neurofascin	NFASC	15.577	180380000	31	22.898	23.2071	23.5656	25.1384	24.456	24.9279
+	1.53792	-2.46568	Q5JRG1;H7BYF2;Q9BVL2-2;Q9BVL2-3;Q9BVL2	Q5JRG1;H7BYF2;Q9BVL2-2;Q9BVL2-3;Q9BVL2	Nucleoporin p58/p45	NUPL1	16.486	221190000	30	24.6331	25.1157	25.121	21.334	23.8162	22.3226
+	2.24561	-1.33994	H7C5G1;Q2TAA2-2;Q2TAA2	H7C5G1;Q2TAA2-2;Q2TAA2	Isoamyl acetate-hydrolyzing esterase 1 homolog	IAH1	9.5872	197200000	15	24.8278	24.4712	24.6361	23.6924	22.9111	23.3117
+	2.0902	1.19322	J3KMX3;P02771;CON__Q3SZ57	J3KMX3;P02771	Alpha-fetoprotein	AFP	323.31	11559000000	258	29.57	29.7795	29.765	30.5006	30.8807	31.313
+	2.41215	2.24091	J3KQA0;P21579;Q8N9I0;O00445-2;O00445	J3KQA0;P21579	Synaptotagmin-1	SYT1	33.488	730120000	61	23.7942	23.7834	24.7864	26.6607	26.0742	26.3518
+	2.53412	1.94315	O14907;A0A087X282	O14907;A0A087X282	Tax1-binding protein 3	TAX1BP3	11.3	190980000	10	23.7513	23.2999	23.1118	25.2071	25.7803	25.0051
+	1.9048	-2.05484	O14929;O14929-2	O14929;O14929-2	Histone acetyltransferase type B catalytic subunit	HAT1	41.482	346000000	51	25.9003	26.6054	25.3844	24.0249	24.3916	23.3091
+	2.13607	1.26829	O15126;O15126-2;A0A087WXB0;A0A087WZA6;A0A087WTX8;A0A087WU14	O15126;O15126-2;A0A087WXB0	Secretory carrier-associated membrane protein 1	SCAMP1	44.881	1070000000	46	25.4766	25.8003	25.7642	27.1623	26.4887	27.1949
+	1.8698	1.38051	O15540;O15540-2	O15540;O15540-2	Fatty acid-binding protein, brain	FABP7	144.19	9956000000	104	28.4587	29.235	29.1488	30.5922	29.8994	30.4925
+	2.5546	-1.06785	O43491;E9PHY5;O43491-3;O43491-4;E9PII3;E9PK52;O43491-2;A0A2R8Y5B3;Q6R5J7;Q6ZSX4;H0Y5B0;E9PPC9;E9PQD2;E9PJP4;E9PQN0;E9PRG1;E9PIG0;E9PN54;E9PMV8	O43491;E9PHY5;O43491-3;O43491-4;E9PII3;E9PK52;O43491-2;A0A2R8Y5B3	Band 4.1-like protein 2	EPB41L2	78.62	1012100000	114	27.2812	27.0399	27.1932	25.8109	26.2337	26.2661
+	1.85431	1.84332	O94772;O94772-2	O94772;O94772-2	Lymphocyte antigen 6H	LY6H	8.8601	327140000	29	23.2979	23.3953	24.4815	25.1251	25.7116	25.868
+	2.77674	-3.2084	O94788;H0YMG7;O94788-2;O94788-3;O94788-4;H0Y2X5;P47895;E9PF31	O94788;H0YMG7;O94788-2;O94788-3;O94788-4	Retinal dehydrogenase 2	ALDH1A2	35.467	306320000	19	26.5418	25.9094	26.1869	22.3975	22.8963	23.719
+	1.28643	-2.2855	O95994;B5MC07;H7C3Z9;C9J3E2	O95994;B5MC07;H7C3Z9;C9J3E2	Anterior gradient protein 2 homolog	AGR2	68.271	404760000	27	26.7056	26.3696	25.3883	23.3475	25.3168	22.9426
+	2.00927	1.65397	P00918;E5RID5;E5RK37	P00918	Carbonic anhydrase 2	CA2	114.1	13788000000	159	28.3499	27.3842	28.428	29.4657	29.8105	29.8478
+	2.21115	1.96169	V9GYE3;V9GYM3;P02652;V9GYG9	V9GYE3;V9GYM3;P02652;V9GYG9	Apolipoprotein A-II;Proapolipoprotein A-II;Truncated apolipoprotein A-II	APOA2	28.004	80385000	7	23.0789	22.8198	22.0328	24.8815	24.2238	24.7112
+	2.25251	1.91394	P02766;A0A087WT59;A0A087WV45	P02766;A0A087WT59;A0A087WV45	Transthyretin	TTR	232.08	9864700000	166	27.6558	27.2379	27.5169	28.7284	29.785	29.6391
+	3.1398	-2.90861	P04040	P04040	Catalase	CAT	20.754	274510000	23	26.0195	26.2065	26.1204	22.6021	23.429	23.5895
+	3.05228	-4.23358	P05976;P05976-2	P05976;P05976-2	Myosin light chain 1/3, skeletal muscle isoform	MYL1	18.947	741650000	30	26.6918	26.6046	27.17	23.4522	21.9865	22.3268
+	1.89981	-2.74665	P09327;P09327-2;B4DV78;H7C0B6;C9J2B5	P09327;P09327-2	Villin-1	VIL1	44.27	348240000	50	26.8713	26.0427	25.9147	22.9984	24.6553	22.935
+	1.59286	-2.31513	X6R5C5;X6R8A1;P10619-2;P10619;U3KQ41;Q5JZH0;U3KQU6	X6R5C5;X6R8A1;P10619-2;P10619	Carboxypeptidase;Lysosomal protective protein;Lysosomal protective protein 32 kDa chain;Lysosomal protective protein 20 kDa chain	CTSA	18.347	472720000	46	26.1899	26.1125	26.3251	23.5126	22.9834	25.1862
+	2.0735	1.79425	P10636-2;P10636-6;P10636-4;P10636-5;A0A0G2JQJ7;A0A0G2JPD5;A0A0G2JS76;A0A0G2JMX7;P10636-7;P10636-8;P10636;P10636-9;I3L170;P10636-3;I3L2Z2	P10636-2;P10636-6;P10636-4;P10636-5;A0A0G2JQJ7;A0A0G2JPD5;A0A0G2JS76;A0A0G2JMX7;P10636-7;P10636-8;P10636;P10636-9;I3L170;P10636-3	Microtubule-associated protein tau;Microtubule-associated protein	MAPT	215.4	6313400000	174	27.4337	28.11	28.2	29.9331	29.1492	30.0443
+	2.03569	-3.72566	P11055;P13533;Q9UKX2-2	P11055	Myosin-3	MYH3	243.45	820780000	80	26.1616	26.5509	28.6099	23.3711	23.7651	23.0092
+	1.52614	-2.01175	P17661	P17661	Desmin	DES	14.859	134060000	16	25.8872	24.7593	24.7716	22.4271	24.0467	22.9091
+	2.12587	1.56433	P17677;P17677-2	P17677;P17677-2	Neuromodulin	GAP43	323.31	8748500000	225	28.5395	28.9579	28.7709	30.5633	29.7458	30.6521
+	1.30885	-2.1778	P19387;H3BRR2	P19387	DNA-directed RNA polymerase II subunit RPB3	POLR2C	13.845	230380000	15	24.9357	25.4172	24.8589	22.4617	24.3699	21.8468
+	2.27495	2.9981	P20719	P20719	Homeobox protein Hox-A5	HOXA5	15.212	348500000	28	23.1287	22.6546	24.0864	26.3782	25.65	26.8359
+	1.75949	3.63174	P22676;H3BN14;A6NER6;H3BMN5	P22676;H3BN14;A6NER6	Calretinin	CALB2	61.058	1397200000	73	22.1307	25.3053	24.0057	27.4547	27.6444	27.2378
+	1.2586	2.35412	P25391	P25391	Laminin subunit alpha-1	LAMA1	80.503	12379000000	184	27.1596	29.681	29.1849	31.1918	30.2354	31.6606
+	2.3389	-1.62146	P27487;F8WE17;H7C1N5;F8WBB6	P27487	Dipeptidyl peptidase 4;Dipeptidyl peptidase 4 membrane form;Dipeptidyl peptidase 4 soluble form	DPP4	92.366	876910000	81	27.6759	27.2839	26.9324	25.8295	25.8888	25.3096
+	2.21339	-2.68628	P31327;P31327-3;P31327-2;Q5R211;E7EWJ3;C9JTA4	P31327;P31327-3;P31327-2	Carbamoyl-phosphate synthase [ammonia], mitochondrial	CPS1	228.35	3777800000	243	30.0129	29.5413	29.3276	26.8146	27.8029	26.2055
+	2.79231	1.0927	P32004-3;P32004-2;P32004;H0Y5C3;E7EVM4;E7EPI4;E9PHJ4;E7EMY4	P32004-3;P32004-2;P32004	Neural cell adhesion molecule L1	L1CAM	41.895	657640000	83	25.236	25.5087	25.4455	26.7231	26.3444	26.4008
+	1.8772	-1.94604	P42166	P42166	Lamina-associated polypeptide 2, isoform alpha;Thymopoietin;Thymopentin	TMPO	55.999	243780000	54	24.9269	25.5655	25.0064	24.0345	22.9302	22.696
+	2.32728	-2.09253	P49593;A8MX49;P49593-2;B5MCT7;C9J2F3;C9JL74	P49593;A8MX49;P49593-2;B5MCT7	Protein phosphatase 1F	PPM1F	18.336	169120000	30	25.0746	24.5638	24.7716	23.0141	23.0793	22.039
+	1.50376	-2.73503	P49888;H0Y8G0	P49888	Estrogen sulfotransferase	SULT1E1	137.15	1032900000	87	28.046	27.4161	27.2994	23.2733	25.9459	25.3372
+	1.68291	-1.43911	P51178;P51178-2	P51178;P51178-2	1-phosphatidylinositol 4,5-bisphosphate phosphodiesterase delta-1	PLCD1	24.688	128340000	20	24.1976	24.3355	24.8769	22.9754	22.4916	23.6256
+	1.45329	2.48311	P61266-2;P61266	P61266-2;P61266	Syntaxin-1B	STX1B	29.092	415900000	47	22.3113	24.8077	23.1178	26.1313	25.3038	26.251
+	1.98256	-1.42569	Q00534	Q00534	Cyclin-dependent kinase 6	CDK6	11.079	134210000	17	25.0628	24.8237	24.6662	23.6602	23.7694	22.8461
+	2.34763	-3.67053	Q05707-2;Q05707;J3QT83;Q4G0W3;A0A0A0MQT7	Q05707-2;Q05707;J3QT83	Collagen alpha-1(XIV) chain	COL14A1	130.43	1388700000	107	27.9216	28.4725	28.475	24.9106	25.4984	23.4485
+	4.2208	-3.07068	Q08257;Q08257-3;A6NP24;Q08257-2;C9JH92	Q08257;Q08257-3;A6NP24;Q08257-2;C9JH92	Quinone oxidoreductase	CRYZ	49.867	398220000	38	26.6651	26.7914	26.546	23.3093	23.6246	23.8565
+	1.35476	2.23717	Q12860-2;Q12860;Q12860-3;H0YIJ1;F8VQW3;F8VX96;F8VUI8;F8VUI9	Q12860-2;Q12860	Contactin-1	CNTN1	83.157	723140000	116	22.8473	25.2399	24.7544	26.7477	26.0182	26.7873
+	1.82257	-2.9767	Q12864;E7EN24;H0YBL0;E5RJT3	Q12864;E7EN24	Cadherin-17	CDH17	42.387	459130000	42	27.0735	26.5695	26.3099	22.5061	24.906	23.6107
+	4.2947	-2.69195	Q13451;Q13451-2	Q13451	Peptidyl-prolyl cis-trans isomerase FKBP5;Peptidyl-prolyl cis-trans isomerase FKBP5, N-terminally processed	FKBP5	28.929	218740000	25	25.7075	25.938	25.5681	22.9527	23.2422	22.9428
+	1.69645	1.46089	Q14194;E9PD68	Q14194;E9PD68	Dihydropyrimidinase-related protein 1	CRMP1	4.4993	1894400000	30	26.2594	26.6517	26.5812	28.3074	27.2159	28.3517
+	2.11862	-1.65516	Q15113	Q15113	Procollagen C-endopeptidase enhancer 1	PCOLCE	16.304	133740000	27	25.182	24.289	24.3846	22.8819	22.7103	23.298
+	1.84814	-1.31559	Q16204	Q16204	Coiled-coil domain-containing protein 6	CCDC6	12.705	218370000	20	24.4179	24.4309	24.3132	23.5303	23.2148	22.4701
+	1.82187	1.50292	Q16352	Q16352	Alpha-internexin	INA	270.85	9475700000	271	28.5246	29.298	29.244	30.8213	29.9841	30.7699
+	1.70048	-1.93191	Q5JX83;Q96MM6	Q5JX83;Q96MM6	Heat shock 70 kDa protein 12B	HSPA12B	38.118	108730000	25	25.2767	24.3246	24.6176	23.6067	22.6897	22.1267
+	2.43036	-1.24929	Q5VTR2;C9J0A5;C9JXC9;C9JWJ4	Q5VTR2	E3 ubiquitin-protein ligase BRE1A	RNF20	42.282	106750000	31	23.915	23.6049	23.7315	22.8483	22.2169	22.4383
+	3.06268	-1.19549	Q86VN1-2;Q86VN1;A0A3B3ISW7	Q86VN1-2;Q86VN1;A0A3B3ISW7	Vacuolar protein-sorting-associated protein 36	VPS36	11.318	111430000	19	24.1333	24.1886	24.0056	22.6769	22.9796	23.0846
+	1.78454	2.35064	Q8NCB2;Q8NCB2-3;Q8NCB2-2;B4DM24;E7ETR1;C9J9E2;C9JSB2;B4DSW8;F8WDJ4	Q8NCB2;Q8NCB2-3;Q8NCB2-2;B4DM24;E7ETR1;C9J9E2	CaM kinase-like vesicle-associated protein	CAMKV	45.78	412680000	64	23.4584	22.5994	23.311	26.3603	25.5268	24.5336
+	3.44028	-2.53142	Q8TD06;H7C040;B5MC62	Q8TD06;H7C040;B5MC62	Anterior gradient protein 3 homolog	AGR3	49.103	232970000	22	25.9658	25.5019	25.4615	23.0243	23.4184	22.8923
+	1.77921	-2.26297	Q8TDN6	Q8TDN6	Ribosome biogenesis protein BRX1 homolog	BRIX1	9.7539	288470000	23	25.9106	25.6672	25.8397	24.6243	23.2936	22.7106
+	2.44701	1.93067	Q8WXC6	Q8WXC6	Myeloma-overexpressed gene 2 protein	MYEOV2	14.421	196160000	16	22.7178	23.6246	23.0334	24.8677	24.9084	25.3917
+	2.24804	-2.29475	Q92692;K7EKE8	Q92692;K7EKE8	Nectin-2	PVRL2	10.942	198680000	20	25.4078	24.6747	24.8768	21.9761	22.9397	23.1593
+	2.94898	-1.62274	Q92797;A0A087WUE9;M0R3C7;Q92797-2;M0R1C2;M0R180;M0QXP5	Q92797;A0A087WUE9;M0R3C7;Q92797-2	Symplekin	SYMPK	94.403	183750000	35	24.9904	25.1519	24.7872	23.6735	23.2506	23.137
+	1.80781	-1.57758	Q92917	Q92917	G patch domain and KOW motifs-containing protein	GPKOW	12.356	210350000	22	24.4175	24.9295	25.2816	23.7726	22.7462	23.3771
+	3.01221	-0.947147	Q969U7-2;Q969U7;K7ENR6;V9GZ55	Q969U7-2;Q969U7;K7ENR6;V9GZ55	Proteasome assembly chaperone 2	PSMG2	8.1979	173520000	23	24.5331	24.5445	24.634	23.7692	23.68	23.421
+	2.67011	1.07138	Q96DG6	Q96DG6	Carboxymethylenebutenolidase homolog	CMBL	33.222	1506700000	87	26.3843	26.4251	26.4711	27.5609	27.2129	27.7208
+	2.39391	-1.36172	Q96GA7;F8VYZ3;H0YIA2;H0YID3	Q96GA7;F8VYZ3	Serine dehydratase-like	SDSL	14.939	62459000	10	24.199	23.5543	24.1295	22.7883	22.5809	22.4285
+	1.82848	1.56153	Q96I59;Q96I59-2;E9PRK2;H0YE96;H0YEL9	Q96I59;Q96I59-2	Probable asparagine--tRNA ligase, mitochondrial	NARS2	61.995	248000000	34	23.5685	22.4117	23.4621	24.7777	24.5241	24.825
+	2.29634	-1.09392	Q96IU4;B4DQI4;F8W9U3;Q96IU4-2	Q96IU4;B4DQI4;F8W9U3	Alpha/beta hydrolase domain-containing protein 14B	ABHD14B	10.462	266690000	14	25.2311	25.2986	25.2878	23.798	24.2959	24.4418
+	1.64184	-1.52481	Q9HB40;I3L4Z9;Q9HB40-2;I3L4Z3;I3L506	Q9HB40;I3L4Z9	Retinoid-inducible serine carboxypeptidase	SCPEP1	13.077	186730000	23	25.4908	24.9848	24.4436	23.6868	22.8578	23.8002
+	2.77174	-1.85565	Q9NR19;Q9NR19-2;F8WCJ4;C9JXD9;C9IYL0;B4DEH9;C9JY31;F8WDJ9;C9J7L5	Q9NR19;Q9NR19-2	Acetyl-coenzyme A synthetase, cytoplasmic	ACSS2	29.134	182890000	32	24.9801	24.8819	24.8443	22.5668	23.2076	23.365
+	3.66442	-1.23545	Q9NUQ7;H0YA18;D6RGX2;H0Y9B0;D6RB53;D6RA67	Q9NUQ7;H0YA18;D6RGX2	Ufm1-specific protease 2	UFSP2	29.172	146800000	31	24.7259	24.4334	24.6069	23.3318	23.2861	23.442
+	3.79282	1.96813	Q9NZR1;G5EA42;Q9NZR1-2;H0YMA2	Q9NZR1;G5EA42;Q9NZR1-2	Tropomodulin-2	TMOD2	16.14	284940000	35	23.3815	23.2695	23.2741	25.2477	25.0529	25.5289
+	2.00911	2.20388	Q9UFM8;Q9Y639-3;Q9Y639-1;Q9Y639-4;Q9Y639-5;Q9Y639;H3BU51	Q9UFM8;Q9Y639-3;Q9Y639-1;Q9Y639-4;Q9Y639-5;Q9Y639	Neuroplastin	DKFZp566H1924;NPTN	7.1564	247790000	20	22.7568	21.9277	23.5636	25.0155	24.8376	25.0068
+	3.30216	1.49605	Q9ULX6-2;Q9ULX6;M0R1Y5;M0QYT7;V9GZ50	Q9ULX6-2;Q9ULX6	A-kinase anchor protein 8-like	AKAP8L	20.533	181750000	22	23.1028	22.9926	23.0773	24.4558	24.8319	24.3731
+	1.95283	2.44769	Q9UQ03-2;Q9UQ03	Q9UQ03-2;Q9UQ03	Coronin-2B	CORO2B	24.55	335960000	32	22.891	23.9487	22.2375	25.1341	25.9094	25.3767
+	2.65598	-1.05259	Q9Y2X3;H7BZ72	Q9Y2X3	Nucleolar protein 58	NOP58	49.115	347200000	63	25.3791	25.4177	25.6739	24.6751	24.3299	24.3079
	0.0436022	0.0152505	A0A024R442;E7ETB3;Q9ULA0;E7EMB6;C9JBE1;F8WAN0;B9ZVU2;E7EPX3;E5RJ35;C9J1E2;C9JRG3	A0A024R442;E7ETB3;Q9ULA0;E7EMB6	Aspartyl aminopeptidase	DNPEP	84.269	698020000	70	26.1814	26.1784	26.0688	25.9767	26.1308	26.3668
	0.305521	-0.140532	A0A024R4E5;Q00341;Q00341-2;H0Y394;H7C0A4;C9J5E5;C9JIZ1;C9JZI8;H7C2D1;C9JHZ8;C9JES8;H7BZC3;C9JHS7;C9JT62;C9JK79;C9JBS3;C9JEJ8;C9JHN6;C9JMQ6;C9JQ82;C9JHS9;C9J739;H7C3D0	A0A024R4E5;Q00341;Q00341-2;H0Y394	Vigilin	HDLBP	323.31	4235800000	292	29.1145	28.5226	28.7322	28.7907	28.565	28.592
	0.150454	0.0962175	A0A024R4M0;P46781;B5MCT8;C9JM19;F2Z3C0;A8MXK4	A0A024R4M0;P46781;B5MCT8;C9JM19	40S ribosomal protein S9	RPS9	19.118	5266100000	82	29.129	28.8705	28.9341	29.2245	28.6309	29.367
	0.669849	0.397212	A0A024R6I7;P01009;A0A0G2JRN3;P01009-2;P01009-3;G3V5R8;G3V2B9;G3V387;A0A0B4J278;G3V544	A0A024R6I7;P01009;A0A0G2JRN3;P01009-2;P01009-3	Alpha-1-antitrypsin;Short peptide from AAT	SERPINA1	34.09	554160000	68	25.7342	25.8431	25.5994	25.6654	26.5644	26.1385
	0.253618	-0.180075	A0A024R7W5;A0A087X0Q1;A0A087WY31;Q7Z739	A0A024R7W5;A0A087X0Q1;A0A087WY31;Q7Z739	YTH domain-containing family protein 3	YTHDF3	49.39	295110000	39	24.5043	25.0767	25.117	25.1018	24.4223	24.6338
	0.446537	0.0832685	A0A024RA52;P25787;C9JCK5;H3BT36;H7C402	A0A024RA52;P25787	Proteasome subunit alpha type;Proteasome subunit alpha type-2	PSMA2	96.432	6516300000	159	29.1653	29.4119	29.3722	29.3531	29.4343	29.4118
	1.33384	0.447379	A0A024RBT2;Q9NR28-2;Q9NR28;Q9NR28-3;H7BZK7;A0A2U3TZH2;H7BZQ7	A0A024RBT2;Q9NR28-2;Q9NR28;Q9NR28-3;H7BZK7;A0A2U3TZH2	Diablo homolog, mitochondrial	DIABLO	95.38	2339900000	128	27.4477	27.7469	27.5633	28.0183	27.8151	28.2666
	0.123999	0.0549863	A0A0G2JL47;A0A024RCR6;A0A0G2JK23;P46379-4;P46379-5;P46379-2;P46379;P46379-3;F6S6P2;X6REW1;A0A0G2JJM1;H0Y4L1;F6UR09;F6U1F2;F6XTU0;H0Y710;A0A0G2JJR8;A0A1B0GX79;F6WML8;F6VEM6;F6X9W3;F6U341;F6TC96	A0A0G2JL47;A0A024RCR6;A0A0G2JK23;P46379-4;P46379-5;P46379-2;P46379;P46379-3;F6S6P2;X6REW1;A0A0G2JJM1	Large proline-rich protein BAG6	BAT3;BAG6	19.285	358310000	50	25.0493	25.0273	25.2985	25.4102	24.9366	25.1932
	0.0212601	-0.0294469	A0A075B7D9;Q92804-2;Q92804;A0A075B7F2	A0A075B7D9;Q92804-2;Q92804	TATA-binding protein-associated factor 2N	TAF15	13.409	407270000	26	25.0774	25.044	25.8082	25.9986	24.6631	25.1796
	0.56432	0.158283	A0A075B7G8;J3KPL8;O00213-2;O00213;A0A087X0V7;A0A087WYH9;O00213-4;O00213-6;O00213-3;O00213-5;V9GY97;V9GYR7	A0A075B7G8;J3KPL8;O00213-2;O00213	Amyloid beta A4 precursor protein-binding family B member 1	APBB1	14.641	108870000	38	23.2994	23.7251	23.4702	23.6477	23.6369	23.6851
	0.81416	0.272514	A0A087WSV8;P80303-2;P80303;E9PKG6;Q2L696;E9PLR0;E9PLE9;A0A2R8Y6G7;H0YEG8;E9PM22;E9PJP3	A0A087WSV8;P80303-2;P80303;E9PKG6;Q2L696	Nucleobindin-2;Nesfatin-1	NUCB2;Nucb2	107.6	1778900000	166	27.4114	27.0551	27.3826	27.6296	27.3491	27.688
	0.319529	0.0722364	A0A087WSW9;A0A087WSY9;Q16881-4;Q16881-3;Q16881;F8W809;A0A182DWI3;Q16881-5;Q16881-2;Q16881-6;E9PIR7;E2QRB9;Q16881-7;E9PKD3;A0A0B4J225;E9PIZ5;E9PQI3;E9PLT3;E9PKI4;E9PJU2	A0A087WSW9;A0A087WSY9;Q16881-4;Q16881-3;Q16881;F8W809;A0A182DWI3;Q16881-5;Q16881-2;Q16881-6;E9PIR7;E2QRB9;Q16881-7	Thioredoxin reductase 1, cytoplasmic	TXNRD1	182	2005500000	167	27.659	27.6712	27.5467	27.6145	27.6137	27.8654
	0.611584	0.325956	K7ERP4;A0A087X2I2;A0A087WT12;P36969-2;P36969;K7EJ20;K7EKX7;K7ENB4;A0A0A0MTT1;R4GNE4;A0A087X247	K7ERP4;A0A087X2I2;A0A087WT12;P36969-2;P36969;K7EJ20;K7EKX7;K7ENB4;A0A0A0MTT1;R4GNE4	Glutathione peroxidase;Phospholipid hydroperoxide glutathione peroxidase, mitochondrial	GPX4	13.037	959730000	50	25.8944	26.4675	26.4328	26.8392	26.6153	26.3181
	1.07043	1.5962	A0A087X0U3;A0A087WT87;P43003-2;P43003	A0A087X0U3;A0A087WT87;P43003-2;P43003	Amino acid transporter;Excitatory amino acid transporter 1	SLC1A3	27.338	443360000	27	23.9006	23.2241	23.2655	25.7969	25.6512	23.7306
	0.491573	-0.58706	A0A087WTA8;P08123	A0A087WTA8;P08123	Collagen alpha-2(I) chain	COL1A2	323.31	10840000000	415	31.1323	29.5897	30.0835	29.7038	30.1081	29.2325
	0.605617	1.18664	A0A087WTZ5;E9PRQ7;Q04323;E9PJ81;Q04323-2;E9PS08	A0A087WTZ5;E9PRQ7;Q04323;E9PJ81;Q04323-2	UBX domain-containing protein 1	UBXN1	187.9	908910000	53	26.3104	26.6593	23.8724	26.7615	26.9022	26.7383
	0.0157022	0.0116685	A0A087WU65;Q9NRW7;A0A2R8YE10;A0A2R8YD95;A0A2R8YF01;Q9NRW7-2;A0A1B0GXI6;A0A2R8YEX8;A0A2R8YDP1;A0A2R8Y7W9;B7Z7G7	A0A087WU65;Q9NRW7;A0A2R8YE10;A0A2R8YD95;A0A2R8YF01;Q9NRW7-2;A0A1B0GXI6	Vacuolar protein sorting-associated protein 45	VPS45	18.648	284290000	40	25.0271	24.8965	24.899	24.4867	25.3026	25.0682
	0.641332	-0.321515	A0A087WUB9;Q8WYA6;Q8WYA6-4;Q8WYA6-3;Q8WYA6-2;A2A2P1	A0A087WUB9;Q8WYA6;Q8WYA6-4;Q8WYA6-3;Q8WYA6-2	Beta-catenin-like protein 1	CTNNBL1	16.679	397130000	52	25.3897	25.2778	25.3099	25.3325	25.1037	24.5766
	0.293805	0.162868	E9PL01;A0A087WUC6;E9PI68;Q15005;E9PRB9;H0YE04	E9PL01;A0A087WUC6;E9PI68;Q15005;E9PRB9	Signal peptidase complex subunit 2	SPCS2	33.144	937350000	51	26.6141	26.3645	26.5816	26.7091	26.3061	27.0336
	0.321687	0.558013	A0A087WUD3;Q9NRP0;Q9NRP0-2	A0A087WUD3;Q9NRP0;Q9NRP0-2	Oligosaccharyltransferase complex subunit OSTC	OSTC	10.304	370780000	25	23.3286	25.4538	24.9946	24.6969	25.7153	25.0388
	0.56001	-0.259953	A0A087WUQ6;P07203;A0A2R8Y6B6;P07203-2	A0A087WUQ6;P07203;A0A2R8Y6B6	Glutathione peroxidase;Glutathione peroxidase 1	GPX1	41.179	1558900000	83	27.5289	27.2954	27.2985	26.7998	27.459	27.0842
	0.548984	-0.213668	E7ETK0;A0A2R8Y849;A0A087WUS0;A0A2R8YD14;P62847-2;P62847-3;P62847;P62847-4;A0A2R8Y8A0	E7ETK0;A0A2R8Y849;A0A087WUS0;A0A2R8YD14;P62847-2;P62847-3;P62847;P62847-4;A0A2R8Y8A0	40S ribosomal protein S24	RPS24	10.865	3742800000	43	28.5095	28.6614	28.7244	28.5733	28.5827	28.0982
	0.735849	0.194928	A0A087WUT6;O60841	A0A087WUT6;O60841	Eukaryotic translation initiation factor 5B	EIF5B	64.689	945820000	122	26.259	26.5041	26.35	26.6794	26.3705	26.648
	0.79274	-0.423346	A0A087WV29;Q9H0A0-2;Q9H0A0;E9PMU0	A0A087WV29;Q9H0A0-2;Q9H0A0	N-acetyltransferase 10	NAT10	10.33	102780000	21	23.7577	23.9608	24.1765	23.6718	23.8313	23.1218
	0.640743	0.115701	A0A087WVQ6;Q00610-2;Q00610;J3KS13;K7EJJ5;J3KSQ2;J3KRF5;J3QL20;F5H5N6;A0A087WV74;A0A087WXH4	A0A087WVQ6;Q00610-2;Q00610	Clathrin heavy chain;Clathrin heavy chain 1	CLTC	323.31	48170000000	1166	32.2334	32.0614	32.096	32.3473	32.258	32.1325
	1.33989	-0.609471	A0A087WYS3;H7C4X9;A0A087WVZ6;Q9ULU4-17;Q9ULU4-15;Q9ULU4-8;Q9ULU4-21;Q9ULU4-18;Q9ULU4-14;Q9ULU4-12;Q9ULU4-22;Q9ULU4-16;Q9ULU4-9;Q9ULU4-5;Q9ULU4-20;Q9ULU4;Q9ULU4-13;Q9ULU4-10;Q9ULU4-11;Q9ULU4-7;Q9ULU4-19;A0A087WV57;Q9ULU4-3;Q9ULU4-6;Q9ULU4-23;Q9ULU4-4;Q5TH12;Q9ULU4-2	A0A087WYS3;H7C4X9;A0A087WVZ6;Q9ULU4-17;Q9ULU4-15;Q9ULU4-8;Q9ULU4-21;Q9ULU4-18;Q9ULU4-14;Q9ULU4-12;Q9ULU4-22;Q9ULU4-16;Q9ULU4-9;Q9ULU4-5;Q9ULU4-20;Q9ULU4;Q9ULU4-13;Q9ULU4-10;Q9ULU4-11;Q9ULU4-7;Q9ULU4-19;A0A087WV57;Q9ULU4-3;Q9ULU4-6;Q9ULU4-23	Protein kinase C-binding protein 1	ZMYND8	27.981	142210000	28	24.0333	24.6741	24.1075	23.6554	23.5518	23.7792
	0.374018	-0.296857	A0A087WVZ9;P19388;A0A0A0MQR7;A0A087WWX0;K7EQN2;K7EJ87;A0A087WVN5	A0A087WVZ9;P19388;A0A0A0MQR7;A0A087WWX0	DNA-directed RNA polymerases I, II, and III subunit RPABC1	POLR2E	21.669	347690000	51	25.0656	25.2994	25.0595	25.2983	25.0165	24.2191
	0.384133	0.436292	A0A087WW40;Q9Y371;Q9Y371-2	A0A087WW40;Q9Y371;Q9Y371-2	Endophilin-B1	SH3GLB1	113.01	315380000	32	25.0055	23.8296	25.4011	25.0438	25.3024	25.1989
	1.1119	-0.519076	A0A087WW77;Q15334	A0A087WW77;Q15334	Lethal(2) giant larvae protein homolog 1	LLGL1	56.699	914990000	95	26.6209	26.7278	26.7623	25.9117	26.6096	26.0324
	0.424494	-0.410552	A0A2R8Y7T6;A0A087WWK8;A0A3B3IRZ4;Q6DN90;A0A2R8Y695;A0A3B3IU98;A0A0C4DGT3;Q6DN90-2;A0A1W2PRJ5;A0A1W2PR28;Q5JU85-3;Q5JU85;A0A1W2PPU7;A0A0G2JLG2;Q9UPP2-2;Q9UPP2	A0A2R8Y7T6;A0A087WWK8;A0A3B3IRZ4;Q6DN90;A0A2R8Y695;A0A3B3IU98;A0A0C4DGT3;Q6DN90-2	IQ motif and SEC7 domain-containing protein 1	IQSEC1	23.295	95855000	34	23.5673	23.8929	23.2949	22.4856	23.7752	23.2627
	0.601224	-0.173114	A0A087WWM4;F8WAN9;H0YNJ6;Q9P2T1;Q9P2T1-2;H0YMB3;H0YLV5;Q9P2T1-3;H0YLB8;H0YNS9;H0YNH0;H0YK13;H0YMR9;H0YK71;H0YMV5;H0YL68;H0YKE1;H0YN22;A0A0B4J281;H0YMG3;H0YKK3;H0YMW6;H0YN74	A0A087WWM4;F8WAN9;H0YNJ6;Q9P2T1;Q9P2T1-2;H0YMB3;H0YLV5;Q9P2T1-3;H0YLB8;H0YNS9	GMP reductase;GMP reductase 2	GMPR2	24.567	212200000	29	24.7611	24.3809	24.6318	24.2938	24.5104	24.4503
	0.22861	0.146073	A0A087WWP4;Q96T37-4;Q96T37-2;Q96T37-3;Q96T37	A0A087WWP4;Q96T37-4;Q96T37-2;Q96T37-3;Q96T37	Putative RNA-binding protein 15	RBM15	12.323	78644000	21	23.1426	23.2004	23.5841	23.2431	23.2503	23.8718
	0.341986	-0.13056	A0A087WXC5;E7ESZ7;O95299;O95299-2;Q8N1B9;C9J6X0;H7C2W5;H7C1Y7;H7C2X4	A0A087WXC5;E7ESZ7;O95299;O95299-2;Q8N1B9;C9J6X0	NADH dehydrogenase [ubiquinone] 1 alpha subcomplex subunit 10, mitochondrial	NDUFA10	21.265	590480000	36	25.6848	25.9502	26.0718	25.96	25.7728	25.5822
	0.234495	-0.122363	A0A087WXM6;J3QQT2;J3KRX5;A0A0A6YYL6;P18621;P18621-3;J3QLC8;J3KRB3;A0A087WWH0;J3QS96;A0A0A0MRF8;P18621-2;A0A087WY81;J3KSJ0	A0A087WXM6;J3QQT2;J3KRX5;A0A0A6YYL6;P18621;P18621-3;J3QLC8;J3KRB3;A0A087WWH0;J3QS96;A0A0A0MRF8;P18621-2;A0A087WY81	60S ribosomal protein L17	RPL17;RPL17-C18orf32	107.2	4671500000	116	28.6592	28.9012	29.0555	29.0584	28.474	28.7163
	0.695715	0.318243	A0A087WY55;Q9NP79;Q5TGM0;Q9NP79-2	A0A087WY55;Q9NP79;Q5TGM0;Q9NP79-2	Vacuolar protein sorting-associated protein VTA1 homolog	VTA1	83.763	2476000000	89	27.6256	27.7498	27.8559	28.0681	27.7169	28.401
	0.707846	0.276168	A0A087WY71;E9PFW3;Q96CW1-2;Q96CW1;C9JJ47;C9JTK4;C9JGT8;C9JJD3;H7C4C3;C9JPV8	A0A087WY71;E9PFW3;Q96CW1-2;Q96CW1;C9JJ47	AP-2 complex subunit mu	AP2M1	142.92	2586300000	134	27.7093	27.6169	27.873	27.7464	27.9778	28.3035
	0.275661	-0.623133	D6RFM0;D6RAH7;H9KV45;A0A0A0MQU3;A0A087WY85;P62837-2;P62837;P61077;P61077-2;P61077-3;D6RAW0;D6RA11	D6RFM0;D6RAH7;H9KV45;A0A0A0MQU3;A0A087WY85;P62837-2;P62837;P61077;P61077-2;P61077-3;D6RAW0	Ubiquitin-conjugating enzyme E2 D2;Ubiquitin-conjugating enzyme E2 D3	UBE2D2;UBE2D3	13.862	922760000	17	26.5472	26.4191	26.8525	26.9769	26.7827	24.1898
	1.89782	-1.03709	A0A087WYP2;Q8IZQ5;H0YE28;H3BV83	A0A087WYP2;Q8IZQ5;H0YE28	Selenoprotein H	C11orf31;SELH	11.883	258400000	23	24.8767	25.1242	25.3045	24.2864	24.2565	23.6513
	0.994844	0.274137	A0A087WYS1;E7EUC7;Q16851;C9JQU9;C9J6Q0	A0A087WYS1;E7EUC7;Q16851	UTP--glucose-1-phosphate uridylyltransferase	UGP2	323.31	5560600000	267	28.868	29.0441	29.0009	29.3156	29.0151	29.4047
	1.02904	0.236844	A0A087WYT3;Q15185-4;Q15185;Q15185-3;B4DDC6;Q15185-2	A0A087WYT3;Q15185-4;Q15185;Q15185-3	Prostaglandin E synthase 3	PTGES3	52.745	5018400000	57	28.6204	28.7377	28.897	29.0511	28.844	29.0705
	2.45408	-1.01342	A0A087WYV8;P35556;D6RJI3;P35556-2;E9PHW4;D6REJ2	A0A087WYV8;P35556;D6RJI3;P35556-2	Fibrillin-2	FBN2	24.879	732710000	59	26.6686	26.3796	26.843	25.6945	25.7258	25.4306
	1.31497	-0.957525	A0A087WZ13;E9PAU2;Q8IY67-2;Q8IY67;K7EKR9;Q8IY67-3	A0A087WZ13;E9PAU2;Q8IY67-2;Q8IY67	Ribonucleoprotein PTB-binding 1	RAVER1	45.886	380840000	53	25.5335	26.0016	25.032	24.4173	24.9507	24.3265
	0.864632	0.559886	A0A087WZN1;O43837;A0A087X2E5;O43837-2;O43837-3;A0A0D9SG66	A0A087WZN1;O43837;A0A087X2E5;O43837-2;O43837-3	Isocitrate dehydrogenase [NAD] subunit, mitochondrial;Isocitrate dehydrogenase [NAD] subunit beta, mitochondrial	IDH3B	18.581	447570000	46	25.265	24.9145	24.392	25.71	25.3921	25.149
	0.349862	0.30079	A0A087WZV0;O43314-2;O43314;D6RBU4;H0Y9M0;H0Y9S9;F8W9A8;B7WPL9;Q6PFW1-6;Q6PFW1-5;Q6PFW1-7;Q6PFW1-4;Q6PFW1-3;Q6PFW1-2;Q6PFW1;K7EPT7;H7C436	A0A087WZV0;O43314-2;O43314	Inositol hexakisphosphate and diphosphoinositol-pentakisphosphate kinase 2	PPIP5K2	17.47	112300000	30	23.4837	23.6507	23.2355	23.9924	24.1851	23.0949
	0.0407013	0.03567	A0A087X020;Q9Y3A5;F8WE72	A0A087X020;Q9Y3A5	Ribosome maturation protein SBDS	SBDS	63.48	828490000	65	26.4825	26.1794	26.3222	26.0775	26.0798	26.9337
	0.0981143	-0.0192598	A0A087X054;Q9Y4L1;E9PJ21;A0A087WWI4;K7EQK2;Q9Y4L1-2;J3KTF1;J3QL06;Q9BST8;J3QQH7;J3QLE9;A0A087X214;A0A087WW13	A0A087X054;Q9Y4L1;E9PJ21;A0A087WWI4;K7EQK2;Q9Y4L1-2	Hypoxia up-regulated protein 1	HYOU1	305.17	9536800000	348	30.0054	29.8556	29.8919	29.9571	29.9474	29.7906
	0.349501	-0.620523	A0A087X0K0;P39059	A0A087X0K0;P39059	Collagen alpha-1(XV) chain;Restin;Restin-2;Restin-3;Restin-4	COL15A1	246.4	3299600000	162	29.4841	27.6127	28.1244	27.715	28.6531	26.9916
	1.69393	-0.180075	A0A087X0R6;Q9UMY4-2;Q9UMY4;Q9UMY4-3	A0A087X0R6;Q9UMY4-2;Q9UMY4;Q9UMY4-3	Sorting nexin-12	SNX12	40.974	589830000	54	25.9354	25.8095	25.8793	25.7557	25.6498	25.6785
	0.510754	-0.416798	A0A087X0S5;P12109	A0A087X0S5;P12109	Collagen alpha-1(VI) chain	COL6A1	323.31	6277700000	267	30.1053	28.9516	29.3569	29.0026	29.2777	28.883
	0.106065	-0.0776666	Q2TAM5;E9PKH5;A0A087X0W8;Q04206-2;Q04206;Q04206-3;Q04206-4;E9PI38;E9PQS6;E9PKV4;A0A087WVP0;E9PJR1;E9PRX2;E9PNV4;E9PMD5;E9PJZ9;E9PM47;E9PNK5;E9PN69	Q2TAM5;E9PKH5;A0A087X0W8;Q04206-2;Q04206;Q04206-3;Q04206-4;E9PI38;E9PQS6;E9PKV4;A0A087WVP0	Transcription factor p65	RELA	18.039	192270000	38	24.412	24.2483	24.0063	24.0371	24.5969	23.7997
	0.587683	-0.314985	A0A0G2JN29;A0A087X117;Q15155;J3KN36;Q5JPE7-2;P69849;Q5JPE7;A0A0G2JP90;A0A087WW46;Q5JPE7-3;A0A087WTD5;H3BUC9;H3BPS9;I3L0Q6;H3BTW1	A0A0G2JN29;A0A087X117;Q15155;J3KN36;Q5JPE7-2;P69849;Q5JPE7;A0A0G2JP90;A0A087WW46;Q5JPE7-3	Nodal modulator 1;Nodal modulator 2;Nodal modulator 3	NOMO1;NOMO3;NOMO2	83.88	946700000	165	26.7814	26.6366	26.6994	26.0036	26.8169	26.3519
	0.613262	-0.284753	A0A087X1A5;Q5JW30;O95793-2;O95793-3;O95793;Q5JW28	A0A087X1A5;Q5JW30;O95793-2;O95793-3;O95793	Double-stranded RNA-binding protein Staufen homolog 1	STAU1	18.772	191530000	31	24.4066	24.231	24.35	23.8535	24.448	23.8318
	0.412597	-0.763599	A0A087X1G7;O60613;A0A0J9YX89;A0A3B3IT39	A0A087X1G7;O60613	15 kDa selenoprotein	2015-09-01	9.1349	334640000	24	25.064	25.3185	25.0024	24.7911	25.4524	22.8505
	0.794784	-0.438148	A0A087X1W8;A0A0A0MTJ8;X5DQS5;Q9BY67-5;Q9BY67;Q9BY67-4;Q9BY67-3;A0A087X0T8;Q9BY67-2;F5H125;F5H0H5;F5H8J9;H0YG94	A0A087X1W8;A0A0A0MTJ8;X5DQS5;Q9BY67-5;Q9BY67;Q9BY67-4;Q9BY67-3;A0A087X0T8;Q9BY67-2	Cell adhesion molecule 1	CADM1	66.993	355730000	54	25.3708	25.3399	24.9217	25.1852	24.6288	24.5039
	0.0530584	0.0194441	A0A087X1Z3;Q9UL46;H0YM70;H0YKU2	A0A087X1Z3;Q9UL46;H0YM70	Proteasome activator complex subunit 2	PSME2	200.84	5984500000	182	29.2272	29.1397	29.2111	29.2864	28.9714	29.3786
	1.70251	0.967783	A0A087X294;O75914-2;O75914;O75914-4;O75914-3;B1AKS5	A0A087X294;O75914-2;O75914;O75914-4;O75914-3	Non-specific serine/threonine protein kinase;Serine/threonine-protein kinase PAK 3	PAK3	21.986	182770000	34	23.1	23.8043	23.7968	24.529	24.3493	24.7262
	0.52103	0.163776	A0A087X2B5;P35613-2;P35613;P35613-4;A0A087WUV8;P35613-3;I3L192;R4GMX5;R4GN83	A0A087X2B5;P35613-2;P35613;P35613-4;A0A087WUV8;P35613-3;I3L192	Basigin	BSG	71.513	1344500000	59	27.0009	26.8483	27.1886	27.3241	26.9939	27.2111
	0.4994	0.366037	A0A087X2D8;O60271-4;O60271-2;O60271;O60271-9;O60271-5;O60271-3;H0YBE9;D6RHI8;H0YBS5	A0A087X2D8;O60271-4;O60271-2;O60271;O60271-9;O60271-5;O60271-3	C-Jun-amino-terminal kinase-interacting protein 4	SPAG9	60.45	427280000	82	25.0215	25.3006	25.2738	25.7282	24.9693	25.9963
	0.416045	0.077212	A0A087X2I1;P62333;H0YJC0;H0YJS8;H0YJX2;H0YJE9;H0YJT1	A0A087X2I1;P62333;H0YJC0	26S protease regulatory subunit 10B	PSMC6	93.096	4977700000	230	28.9353	28.8264	29.006	29.0755	28.8829	29.0408
	1.48723	-0.486183	P0DPI2;A0A0B4J2D5;A0A096LPI6;A0A096LNH5;P0DPI2-2;A0A0B4J2H4;A0A0B4J2D5-2;H7C2G3;H7C1F6;A0A096LP73;A0A2R8YDR7;F2Z2Q0;A0A096LP12;A0A096LNJ1;A0A2R8Y6K9	P0DPI2;A0A0B4J2D5;A0A096LPI6;A0A096LNH5;P0DPI2-2;A0A0B4J2H4;A0A0B4J2D5-2;H7C2G3;H7C1F6;A0A096LP73;A0A2R8YDR7;F2Z2Q0;A0A096LP12		C21orf33	60.08	1881700000	89	27.6627	27.7324	27.8597	27.0709	27.5371	27.1882
	0.563019	0.454348	A0A0A0MR02;P45880;P45880-2;P45880-1;Q5JSD2;Q5JSD1;A2A3S1	A0A0A0MR02;P45880;P45880-2;P45880-1;Q5JSD2;Q5JSD1	Voltage-dependent anion-selective channel protein 2	VDAC2	211.94	15025000000	193	29.5076	30.1416	30.2702	30.8911	30.4348	29.9566
	0.0409044	-0.0165501	A0A0A0MRA5;B7Z4B8;Q9BUJ2-4;Q9BUJ2-2;Q9BUJ2;M0R3F1;Q9BUJ2-3;M0QYZ0;M0QYI8;M0R0K8;M0QYM5;M0R203;M0QZV6;Q9BUJ2-5	A0A0A0MRA5;B7Z4B8;Q9BUJ2-4;Q9BUJ2-2;Q9BUJ2;M0R3F1;Q9BUJ2-3;M0QYZ0	Heterogeneous nuclear ribonucleoprotein U-like protein 1	HNRNPUL1	89.99	1872800000	128	27.3631	27.6163	27.6595	27.7179	27.5041	27.3673
	0.711685	-0.441685	A0A0A0MRE1;B4DJ07;A0A0A0MSB8;Q9UPT5-2;Q9UPT5-5;Q9UPT5-1;Q9UPT5-6;Q9UPT5;Q9UPT5-4;C9JKC2;B5MCY9;K7ERQ5	A0A0A0MRE1;B4DJ07;A0A0A0MSB8;Q9UPT5-2;Q9UPT5-5;Q9UPT5-1;Q9UPT5-6;Q9UPT5	Exocyst complex component 7	EXOC7	28.165	197620000	41	24.8616	24.7688	24.0075	24.2583	23.9661	24.0885
	1.72999	1.17824	A0A0A0MRE6;O94967-2;O94967;O94967-3;O94967-4;E9PR96;E9PN15;E9PNF6;E9PKZ6	A0A0A0MRE6;O94967-2;O94967;O94967-3;O94967-4	WD repeat-containing protein 47	WDR47	18.392	206110000	40	23.826	23.2535	24.3079	25.0539	24.9109	24.9573
	0.696681	0.415186	A0A0A0MRG2;E9PG40;P05067-10;P05067-3;P05067-4;P05067-5;P05067-6;P05067-7;P05067-11;P05067-8;P05067-9;P05067;H7C0V9;H7C2L2;P05067-2	A0A0A0MRG2;E9PG40;P05067-10;P05067-3;P05067-4;P05067-5;P05067-6;P05067-7;P05067-11;P05067-8;P05067-9;P05067;H7C0V9	Amyloid beta A4 protein;N-APP;Soluble APP-alpha;Soluble APP-beta;C99;Beta-amyloid protein 42;Beta-amyloid protein 40;C83;P3(42);P3(40);C80;Gamma-secretase C-terminal fragment 59;Gamma-secretase C-terminal fragment 57;Gamma-secretase C-terminal fragment 50;C31	APP	59.383	868630000	107	26.0651	26.0966	26.4589	26.6127	26.2103	27.043
	0.438563	0.173047	A0A0A0MRJ6;H7BY58;P22061;P22061-2;F6S8N6;C9J0F2;F8WDT3;F8WAV5;F8WAX2	A0A0A0MRJ6;H7BY58;P22061;P22061-2;F6S8N6	Protein-L-isoaspartate O-methyltransferase;Protein-L-isoaspartate(D-aspartate) O-methyltransferase	PCMT1	124.75	3118000000	147	28.0673	28.3664	28.1519	28.0847	28.5528	28.4672
	0.364754	0.178106	A0A0A0MRM8;Q9UM54-6;A0A0D9SGC1;E7EW20;Q9UM54-5;Q9UM54-2;Q9UM54-4;Q9UM54-1;Q9UM54;Q5JVM0	A0A0A0MRM8;Q9UM54-6;A0A0D9SGC1;E7EW20;Q9UM54-5;Q9UM54-2;Q9UM54-4;Q9UM54-1;Q9UM54	Unconventional myosin-VI	MYO6	139.71	1688800000	204	26.8679	27.495	27.3128	27.5498	27.2622	27.3979
	0.287544	0.12033	A0A0A0MRN5;Q9NZT2-2;Q9NZT2;A0A087X028	A0A0A0MRN5;Q9NZT2-2;Q9NZT2	Opioid growth factor receptor	OGFR	49.445	193030000	52	24.0642	23.9453	24.3156	24.3767	23.9717	24.3378
	0.37978	0.46954	A0A0C4DG97;A0A0A0MRS5;F8W946;Q9BXM9-2;Q9BXM9;Q8N450;C9JD05;Q9BXM9-3	A0A0C4DG97;A0A0A0MRS5;F8W946;Q9BXM9-2;Q9BXM9;Q8N450;C9JD05	FSD1-like protein	FSD1L	13.722	168700000	20	23.3033	24.1939	23.7971	24.9641	24.3285	23.4104
	1.0376	0.460168	B6VEX4;A0A0A0MRT6;Q8IZP0-10;Q8IZP0-8;Q8IZP0-7;Q8IZP0-2;Q8IZP0-4;Q8IZP0-3;Q8IZP0-5;Q8IZP0-6;Q8IZP0-9;Q8IZP0;Q8IZP0-12;Q8IZP0-11	B6VEX4;A0A0A0MRT6;Q8IZP0-10;Q8IZP0-8;Q8IZP0-7;Q8IZP0-2;Q8IZP0-4;Q8IZP0-3;Q8IZP0-5;Q8IZP0-6;Q8IZP0-9;Q8IZP0;Q8IZP0-12;Q8IZP0-11	Abl interactor 1	ABI1	49.803	867910000	63	26.2014	26.4629	25.7955	26.5462	26.5301	26.764
	0.63068	0.463489	A0A0A0MRX1;Q12926;Q12926-2;B1AM48;C9JB16	A0A0A0MRX1;Q12926;Q12926-2;B1AM48	ELAV-like protein;ELAV-like protein 2	ELAVL2	18.716	375720000	48	24.2788	25.4009	25.0033	25.4399	25.3212	25.3124
	1.28952	0.494622	A0A0A0MS41;A0A1P0AYU5;Q9BWM7;S4R3N9	A0A0A0MS41;A0A1P0AYU5;Q9BWM7;S4R3N9	Sideroflexin;Sideroflexin-3	SFXN3	25.89	1260800000	62	26.4722	26.3664	26.7028	27.2992	26.9264	26.7997
	0.13857	-0.0883236	B3KPJ4;A0A0A0MSI2;Q8IXK0-2;Q8IXK0-4;Q8IXK0;Q8IXK0-5;Q8IXK0-3;H7C528;Q8NDX5-2;Q8NDX5;Q8NDX5-7	B3KPJ4;A0A0A0MSI2;Q8IXK0-2;Q8IXK0-4;Q8IXK0;Q8IXK0-5;Q8IXK0-3	Polyhomeotic-like protein 2	PHC2	7.1537	166160000	19	23.8737	24.3903	24.5236	24.3151	23.9197	24.2878
	0.24027	0.116645	A0A0A0MSK4;A0A087WVF5;A0A0A0MRC4;Q86YR5-4;Q86YR5;Q86YR5-3;Q86YR5-2	A0A0A0MSK4;A0A087WVF5;A0A0A0MRC4;Q86YR5-4;Q86YR5;Q86YR5-3	G-protein-signaling modulator 1	GPSM1	14.263	136200000	32	23.5134	23.8913	23.8193	23.7493	24.1588	23.6659
	0.279864	0.0597363	A0A0A0MSK5;Q5JTV8;Q5JTV8-3;J3KN66;H0YD16;H0Y4R4;Q5JTV8-2;H0YDU3	A0A0A0MSK5;Q5JTV8;Q5JTV8-3;J3KN66;H0YD16;H0Y4R4;Q5JTV8-2	Torsin-1A-interacting protein 1	TOR1AIP1	62.388	409650000	49	25.1261	25.2309	25.1304	25.3785	25.1272	25.1609
	3.16445	0.659743	A0A0C4DFN8;A0A0A0MSZ4;P22570;P22570-7;A0A0A0MTR6;A0A0C4DGN7;A0A0A0MT64;P22570-5;P22570-2;P22570-3;A0A0A0MTN9;P22570-4;P22570-6;J3QQX3;J3QKZ8;J3KS64;J3QQW7	A0A0C4DFN8;A0A0A0MSZ4;P22570;P22570-7;A0A0A0MTR6;A0A0C4DGN7;A0A0A0MT64;P22570-5;P22570-2;P22570-3;A0A0A0MTN9;P22570-4;P22570-6;J3QQX3	NADPH:adrenodoxin oxidoreductase, mitochondrial	FDXR	130.26	752920000	69	25.6682	25.6665	25.8249	26.4604	26.3032	26.3752
	0.747776	1.83336	M0R116;A0A2R8YEY8;A0A0A0MT26;P13637;P13637-2;P13637-3;M0QXF2;P54707;P54707-2	M0R116;A0A2R8YEY8;A0A0A0MT26;P13637;P13637-2;P13637-3	Sodium/potassium-transporting ATPase subunit alpha-3	ATP1A3	159.15	2398900000	160	24.2753	27.8091	27.4611	28.3661	28.2453	28.4342
	0.848398	0.327712	A0A0A0MT83;P26440;P26440-2;H7C4G6;H0YN10;A0A087WVD3;H0YKV0;H0YLC3	A0A0A0MT83;P26440;P26440-2;H7C4G6;H0YN10	Isovaleryl-CoA dehydrogenase, mitochondrial	IVD	59.138	1086600000	82	26.4444	26.4718	26.5879	26.9013	26.4983	27.0877
	1.24141	0.828158	A0A0A0MTH0;B4DHI3;A6NMU8;Q8NFZ3-2;Q8NFZ3;Q8N0W4;Q8N0W4-2;Q8NFZ4;I3L498;J3KQ19;Q8N2Q7-2;Q8N2Q7	A0A0A0MTH0;B4DHI3;A6NMU8;Q8NFZ3-2;Q8NFZ3;Q8N0W4;Q8N0W4-2	Neuroligin-4, Y-linked;Neuroligin-4, X-linked	NLGN4X;NLGN4Y	15.648	95793000	24	22.7352	23.215	23.2694	23.3913	24.2696	24.0433
	0.655582	-0.522331	A0A0A0MTH3;Q13418;Q13418-3;Q13418-2;A0A087WWY6	A0A0A0MTH3;Q13418;Q13418-3;Q13418-2	Integrin-linked protein kinase	ILK	19.459	384150000	40	26.1447	25.3003	25.181	24.7264	25.3888	24.9437
	0.181319	-0.127663	B8ZWD1;A0A0A0MTI5;P07108;P07108-3;P07108-2;P07108-4;P07108-5;P07108-6	B8ZWD1;A0A0A0MTI5;P07108;P07108-3;P07108-2;P07108-4;P07108-5	Acyl-CoA-binding protein	DBI	83.732	5465600000	57	28.6759	28.8772	28.8576	29.1007	28.7239	28.203
	0.0679527	0.0244452	A0A0A0MTN0;Q13617;Q13617-2;Q5T2B5;Q5T2B7	A0A0A0MTN0;Q13617;Q13617-2;Q5T2B5	Cullin-2	CUL2	116.02	1114400000	105	26.7837	26.7365	26.705	26.7414	26.9914	26.5658
	0.389504	0.119292	A0A0A6YYA0;Q86XR7-2;Q9Y3B3-2;Q9Y3B3;G3V2Y2	A0A0A6YYA0;Q86XR7-2;Q9Y3B3-2;Q9Y3B3	Transmembrane emp24 domain-containing protein 7	TMED7-TICAM2;TMED7	49.963	1927500000	63	27.5101	27.3024	27.4233	27.7356	27.5175	27.3406
	1.29922	-0.734312	A0A0A6YYH1;Q7Z6K5;Q7Z6K5-2;H0YMP5;H0YL03;H0YMK0;H0YL85	A0A0A6YYH1;Q7Z6K5;Q7Z6K5-2	Arpin	C15orf38-AP3S2;ARPIN	57.537	120410000	17	23.647	23.9257	23.9032	23.0615	23.5368	22.6746
	0.0365239	0.025802	P57737-3;A0A0A6YYL4;I3L167;E7EP81;I3L2Y6;I3L359;I3L351;I3L1U7;I3L0X9;I3L3T0;I3L1M1;I3NI06;I3L212;I3L426;I3L1G9;Q9Y3D7;I3L0X8;I3L442	P57737-3;A0A0A6YYL4	Coronin	CORO7-PAM16	80.35	558530000	86	25.403	25.7851	25.9667	25.8557	25.9705	25.4059
	0.399697	0.26613	A0A0B4J1Z1;C9JAB2;Q16629-3;Q16629-2;Q16629-4;Q16629	A0A0B4J1Z1;C9JAB2;Q16629-3;Q16629-2;Q16629-4;Q16629	Serine/arginine-rich splicing factor 7	SRSF7	30.224	2225700000	58	27.312	27.7665	27.5798	28.0624	27.321	28.0733
	0.3789	-0.26009	A0A0B4J2A0;Q9UHJ6	A0A0B4J2A0;Q9UHJ6	Sedoheptulokinase	TRPV1;SHPK	29.999	372420000	46	25.3591	25.4846	25.4821	24.9214	25.7517	24.8724
	0.363176	0.213803	F8WF49;A0A0B4J2C2;Q9Y2H0-3;Q9Y2H0-1;Q9Y2H0;A0A087X246;A0A087WWE6	F8WF49;A0A0B4J2C2;Q9Y2H0-3;Q9Y2H0-1;Q9Y2H0	Disks large-associated protein 4	DLGAP4	17.149	763990000	60	25.7107	26.4914	26.3495	26.3151	26.4943	26.3836
	1.26584	0.268517	Q5W0H4;A0A0B4J2C3;P13693;J3KPG2;E9PJF7;P13693-2;Q56UQ5;H0YCX0	Q5W0H4;A0A0B4J2C3;P13693;J3KPG2;E9PJF7;P13693-2	Translationally-controlled tumor protein	TPT1	26.801	5314700000	89	28.8303	28.9673	29.0835	29.32	29.0971	29.2696
	0.369934	-0.581818	A0A0B4J2F8;F8WF84;F6S314;E2QRJ6;A6NFM0;Q9H1A7;Q9GZM3;P52435;D6RAG0;E7EP90;A0A0B4J1Z8;E7EWC6;Q9GZM3-2	A0A0B4J2F8;F8WF84;F6S314;E2QRJ6;A6NFM0;Q9H1A7;Q9GZM3;P52435	DNA-directed RNA polymerase II subunit RPB11-b2;DNA-directed RNA polymerase II subunit RPB11-b1;DNA-directed RNA polymerase II subunit RPB11-a	POLR2J3;POLR2J;POLR2J2	8.2977	115460000	22	23.7031	24.0313	23.8145	24.0696	23.7556	21.9783
	1.04755	-0.872607	A0A0C4DFL7;Q16850;Q16850-2;H7C0D0;C9IYR8;A0A3B3ITR4	A0A0C4DFL7;Q16850;Q16850-2	Lanosterol 14-alpha demethylase	CYP51A1	21.848	204360000	28	25.1137	24.9945	24.624	23.8134	24.7475	23.5536
	0.120237	0.134244	A0A0C4DFM1;Q92544;F8WCN2;F2Z2L1	A0A0C4DFM1;Q92544	Transmembrane 9 superfamily member 4	TM9SF4	39.49	421380000	57	25.1669	24.8596	25.7392	24.9022	25.9795	25.2868
	0.137506	-0.0811049	A0A0C4DFV9;Q01105-3;Q01105-4;Q01105-2;Q01105;A0A087X027;P0DME0	A0A0C4DFV9;Q01105-3;Q01105-4;Q01105-2;Q01105;A0A087X027;P0DME0	Protein SET;Protein SETSIP	SET;SETSIP	201.46	11883000000	125	29.9369	30.5376	30.3155	29.9847	30.4256	30.1364
	0.00719756	0.00908724	A0A0C4DFZ1;A8MZ54;Q16623-3;Q16623-2;Q16623	A0A0C4DFZ1;A8MZ54;Q16623-3;Q16623-2;Q16623	Syntaxin-1A	STX1A	26.466	69309000	18	23.0737	23.9632	23.0376	23.7348	22.8099	23.5571
	0.105806	-0.0714944	A0A0C4DFZ2;P15289-2;P15289	A0A0C4DFZ2;P15289-2;P15289	Arylsulfatase A;Arylsulfatase A component B;Arylsulfatase A component C	ARSA	44.645	786930000	56	26.4912	26.0014	26.3944	26.3315	25.8509	26.4901
	1.12573	-0.55183	C9J9K3;A0A0C4DG17;P08865;F8WD59	C9J9K3;A0A0C4DG17;P08865	40S ribosomal protein SA	RPSA	238.08	11893000000	212	30.4013	30.4598	30.6491	29.7047	30.3864	29.7636
	0.211482	-0.0853793	A0A0C4DG89;Q7L014;D6RJA6;H0Y9U3	A0A0C4DG89;Q7L014	Probable ATP-dependent RNA helicase DDX46	DDX46	61.641	1287300000	135	26.9883	27.0225	26.9183	27.1934	26.7859	26.6937
	1.00313	0.394661	A0A0C4DGA2;O75521-2;O75521;F1LLU7;F8WAW4;C9JB63;F8W6J1	A0A0C4DGA2;O75521-2;O75521;F1LLU7;F8WAW4;C9JB63	Enoyl-CoA delta isomerase 2, mitochondrial	ECI2	88.856	1264700000	110	26.664	26.4096	26.9926	27.2249	27.0545	26.9707
	0.342515	-0.333935	A0A0C4DGB5;E9PCH5;E7EVY3;B7Z574;P20810-4;P20810-8;P20810-2;P20810;P20810-9;P20810-5;P20810-10;P20810-7;P20810-6;E7ES10;P20810-3;H0Y7F0;H0Y9H6;E9PDE4;E7EQ12;A0A0A0MR45;E7EQA0;H0YD33;F8W7E0;A0A0C4DGD1;H0Y944;E9PSG1;D6RAA8;D6RC54;D6RGF7;D6RBR1;E7EN75;E7EQK6;H0YA91	A0A0C4DGB5;E9PCH5;E7EVY3;B7Z574;P20810-4;P20810-8;P20810-2;P20810;P20810-9;P20810-5;P20810-10;P20810-7;P20810-6;E7ES10;P20810-3;H0Y7F0;H0Y9H6;E9PDE4;E7EQ12;A0A0A0MR45;E7EQA0;H0YD33	Calpastatin	CAST	96.295	665850000	96	26.3515	25.7539	26.1052	26.1991	25.9923	25.0174
	0.780389	-0.25803	A0A2R8Y425;A0A2R8Y5J0;A0A2R8YFK9;A0A2U3TZM0;F5GWX5;A0A2R8Y212;A0A2R8Y521;A0A0C4DGG9;Q14839;Q14839-2;A0A2R8YFD8;A0A2R8YD40;A0A2R8YDJ9;A0A2R8Y4X2;A0A2R8YER1;A0A2R8Y8C1;A0A2R8Y445;A0A2R8YDW2;A0A2R8Y5Z7;A0A2R8Y685;A0A2R8Y7I0;A0A2R8Y7M9;A0A2R8Y8B3;A0A2R8Y5M9;A0A2R8YE38;F5H6N4;A0A2R8Y6G9;A0A2R8Y795;A0A2R8Y7X1	A0A2R8Y425;A0A2R8Y5J0;A0A2R8YFK9;A0A2U3TZM0;F5GWX5;A0A2R8Y212;A0A2R8Y521;A0A0C4DGG9;Q14839;Q14839-2;A0A2R8YFD8;A0A2R8YD40;A0A2R8YDJ9;A0A2R8Y4X2;A0A2R8YER1;A0A2R8Y8C1;A0A2R8Y445;A0A2R8YDW2;A0A2R8Y5Z7;A0A2R8Y685	Chromodomain-helicase-DNA-binding protein 4	CHD4	294.76	3824400000	342	28.5762	28.6737	28.7142	28.6741	28.3416	28.1744
	0.226389	-0.193466	A0A0C4DGN6;Q9Y2X7;Q9Y2X7-3;J3QRU8;K7EN79;J3QQI0;J3QL89;Q9Y2X7-2;J3QLH1	A0A0C4DGN6;Q9Y2X7;Q9Y2X7-3;J3QRU8	ARF GTPase-activating protein GIT1	GIT1	38.462	466510000	63	25.753	25.3859	25.7302	24.9626	26.0227	25.3034
	0.0897385	0.0372601	A0A0C4DGQ5;P04632;K7ELJ7;A0A075B7C0;U3KQE2;K7EM73;K7EIV0;K7EKD8;K7ES78;Q96L46;K7EMQ1	A0A0C4DGQ5;P04632;K7ELJ7;A0A075B7C0;U3KQE2;K7EM73;K7EIV0;K7EKD8	Calpain small subunit 1	CAPNS1	242.02	4131500000	124	28.8769	28.5406	28.6763	28.8746	28.5162	28.8147
	1.82201	-0.668561	R4GN43;A0A0C4DGS0;A0A2Y9D025;P56556	R4GN43;A0A0C4DGS0;A0A2Y9D025;P56556	NADH dehydrogenase [ubiquinone] 1 alpha subcomplex subunit 6	NDUFA6	4.3274	146300000	16	24.0479	24.3543	24.0265	23.5922	23.2246	23.6061
	0.422086	-0.118004	A0A0C4DGS1;P39656-3;P39656;P39656-2;U3KQ84	A0A0C4DGS1;P39656-3;P39656;P39656-2	Dolichyl-diphosphooligosaccharide--protein glycosyltransferase 48 kDa subunit	DDOST	218.19	5522500000	146	29.2254	29.058	29.0813	28.8026	29.1683	29.0398
	0.108831	0.118197	A0A0D9SEM4;Q08170;A0A0D9SGD2	A0A0D9SEM4;Q08170	Serine/arginine-rich splicing factor 4	SRSF4	44.697	1256100000	45	26.7412	27.1968	26.803	27.0674	26.3814	27.6468
	1.74804	1.3498	A0A0D9SF30	A0A0D9SF30		NCAM1	196.69	3239900000	169	26.9584	27.7573	27.5822	29.0129	28.2836	29.0508
	0.0271145	0.0273094	A0A0D9SFK2;Q92614-4;Q92614;Q92614-2;Q92614-3;Q92614-5;H0YEV9;A0A1B0GWJ6	A0A0D9SFK2;Q92614-4;Q92614;Q92614-2;Q92614-3;Q92614-5	Unconventional myosin-XVIIIa	MYO18A	171.29	574530000	132	25.2641	26.1756	25.8409	25.4418	26.1613	25.7595
	0.228465	0.31426	A0A140T8Z0;A0A0G2JH68;O60610-2;O60610-3;O60610;H9KV28;A0A2R8Y5N1;H7C2W8;B4E2I7	A0A140T8Z0;A0A0G2JH68;O60610-2;O60610-3;O60610;H9KV28;A0A2R8Y5N1	Protein diaphanous homolog 1	DIAPH1	33.424	176760000	42	24.3645	24.5419	22.8708	24.0945	24.4228	24.2026
	0.205456	0.0581627	A0A0G2JIW1;P0DMV9;P0DMV8;P0DMV8-2;V9GZ37	A0A0G2JIW1;P0DMV9;P0DMV8;P0DMV8-2;V9GZ37	Heat shock 70 kDa protein 1B;Heat shock 70 kDa protein 1A	HSPA1B;HSPA1A	323.31	21169000000	391	30.7124	30.8347	30.8924	30.6801	30.9708	30.9631
	1.06163	1.61542	A0A1B0GTP1;A0A1B0GTE9;A0A0G2JLL6;Q7Z6L0-3;Q7Z6L0;Q7Z6L0-2;H3BN10;A0A1B0GU37;A0A1B0GTR2;A0A1B0GUW9;A0A1B0GTS0;A0A1B0GUR0	A0A1B0GTP1;A0A1B0GTE9;A0A0G2JLL6;Q7Z6L0-3;Q7Z6L0;Q7Z6L0-2;H3BN10;A0A1B0GU37;A0A1B0GTR2;A0A1B0GUW9;A0A1B0GTS0;A0A1B0GUR0	Proline-rich transmembrane protein 2	PRRT2	12.923	115910000	10	22.2542	24.264	22.2104	24.3623	24.2352	24.9775
	0.0607974	-0.0644538	A0A0G2JNZ2;A0A0G2JPP5;Q14160;Q14160-3;A0A0G2JMS7;Q14160-2;H0YCG0;H0YDF9;Q5T0G3;Q9BTT6-2;Q9BTT6	A0A0G2JNZ2;A0A0G2JPP5;Q14160;Q14160-3;A0A0G2JMS7;Q14160-2	Protein scribble homolog	SCRIB	47.826	368660000	51	24.4961	25.4487	25.4044	25.2487	25.2493	24.6578
	0.14615	0.0745099	A0A0G2JQ41;A0A1C7CYZ0;Q12979-4;Q12979-2;Q12979;B7Z683;Q12979-3;I3NI05;I3L2P5;A0A0G2JRJ1;I3L3W0;I3L0R7;A0A0G2JQT5;I3L379;A0A0G2JQB5;I3L1U8;I3L4Y1	A0A0G2JQ41;A0A1C7CYZ0;Q12979-4;Q12979-2;Q12979;B7Z683	Active breakpoint cluster region-related protein	ABR	33.167	256940000	43	24.5595	24.8215	24.3207	24.6168	24.4432	24.8652
	0.118253	-0.101555	A0A0G2JQ62;Q8NF37;A0A0G2JRI7	A0A0G2JQ62;Q8NF37;A0A0G2JRI7	Lysophosphatidylcholine acyltransferase 1	LPCAT1	76.324	253210000	40	24.6492	24.782	24.9217	24.0882	24.8819	25.0783
	0.358546	0.104144	A0A0J9YXF2;A0A0J9YYG4;Q15165-1;Q15165;J3QT77;Q15165-3;G3XAK4;A0A0J9YXU7;A0A0J9YYJ1;A0A2Q2SAK4;A0A0J9YYF0;A0A0J9YYF3;A0A0J9YXM1	A0A0J9YXF2;A0A0J9YYG4;Q15165-1;Q15165;J3QT77;Q15165-3;G3XAK4	Serum paraoxonase/arylesterase 2	PON2	135.19	2571700000	179	27.7414	28.0877	27.8202	27.9112	28.1067	27.9439
	1.63709	0.23853	A0A0U1RQP1;Q05193-3;Q05193;A0A0D9SFB1;A0A0D9SFE4;Q05193-5;Q05193-2;A0A1B0GU67;A0A1B0GUX5	A0A0U1RQP1;Q05193-3;Q05193;A0A0D9SFB1;A0A0D9SFE4;Q05193-5;Q05193-2;A0A1B0GU67	Dynamin-1	DNM1	39.592	479990000	58	25.2044	25.2667	25.4158	25.5256	25.5761	25.5008
	0.108869	0.18519	A0A0U1RR39;P22681;A0A1B0GW38;A0A0U1RQX8	A0A0U1RR39;P22681;A0A1B0GW38;A0A0U1RQX8	E3 ubiquitin-protein ligase CBL	CBL	26.439	459660000	45	24.9798	25.29	25.2153	24.5	26.5253	25.0153
	0.244146	-0.249157	A0A0U1RRB6;Q9Y2D4;J3QT38;Q9Y2D4-2	A0A0U1RRB6;Q9Y2D4;J3QT38;Q9Y2D4-2	Exocyst complex component 6B	EXOC6B	18.889	188100000	24	24.5312	24.6937	23.7045	23.9013	24.5728	23.7078
	1.18253	-0.31553	A0A0U1RRM4;P26599;P26599-2;P26599-3;A6NLN1;A0A0D9SF20;K7EK45;K7EKJ7;A0A087WUW5;K7ES59;A0A087WU68;K7ELW5;X6R242	A0A0U1RRM4;P26599;P26599-2;P26599-3;A6NLN1;A0A0D9SF20	Polypyrimidine tract-binding protein 1	PTBP1	323.31	18059000000	317	30.9343	30.9299	31.0112	30.6788	30.4149	30.8351
	0.545416	-0.60785	A0A0X1KG71;Q8WX92	A0A0X1KG71;Q8WX92	Negative elongation factor B	NELFB	36.128	272830000	47	24.8976	24.9728	24.6688	24.9616	24.4346	23.3193
	0.584079	1.32954	A0A140TA86;Q5XKP0;K7EIR2;A0A140TA84	A0A140TA86;Q5XKP0;K7EIR2;A0A140TA84	Protein QIL1	QIL1;C19orf70	23.877	304880000	21	23.7343	23.7545	22.4708	25.3341	22.8235	25.7907
	1.04602	0.960118	A0A2R8YFE3;A0A2U3U0E3;A0A2R8YG01;A0A163QEF0;H0YEK4;A0A2R8Y6B8;P43004-3;P43004;A0A2R8Y4D1;C9J9N5;A0A2R8YH93;A0A2R8Y6J5;A0A2R8Y862;A0A2R8Y740;A0A2R8Y5Y1;A0A2U3TZS7;A0A2R8Y4W1;A0A2R8Y860;A0A2R8YD46;P43004-2;A0A2R8Y642;H0YEB1;A0A2R8YHI4;A0A2R8Y4N0	A0A2R8YFE3;A0A2U3U0E3;A0A2R8YG01;A0A163QEF0;H0YEK4;A0A2R8Y6B8;P43004-3;P43004;A0A2R8Y4D1;C9J9N5;A0A2R8YH93;A0A2R8Y6J5;A0A2R8Y862;A0A2R8Y740;A0A2R8Y5Y1;A0A2U3TZS7;A0A2R8Y4W1;A0A2R8Y860;A0A2R8YD46;P43004-2;A0A2R8Y642	Amino acid transporter;Excitatory amino acid transporter 2	SLC1A2	15.903	154580000	21	22.5123	23.228	23.7543	24.2953	23.6559	24.4237
	1.01461	0.338755	A0A1B0GTB8;A0A1B0GWC0;A0A1B0GVF3;P23786;A0A1B0GV75;A0A1B0GTM0	A0A1B0GTB8;A0A1B0GWC0;A0A1B0GVF3;P23786;A0A1B0GV75	Carnitine O-palmitoyltransferase 2, mitochondrial	CPT2	39.856	646460000	62	25.9468	25.8805	25.543	26.0668	26.0054	26.3144
	0.107697	-0.10496	A0A1B0GTF3;O43301;K7ELE6	A0A1B0GTF3;O43301	Heat shock 70 kDa protein 12A	HSPA12A	14.808	105650000	18	23.7836	22.9968	23.4069	22.7543	23.5881	23.53
	0.0564732	-0.0183646	A0A1B0GWJ0;A0A1B0GTJ7;P30566;A0A0A6YY92;A0A096LNY6;P30566-2;A0A1B0GWF8;A0A1B0GTG9;A0A096LNY5;A0A096LPA2;A0A096LP76;A0A096LNY4;V9GY96;A0A096LP92;B4DEP1;A0A1W2PRX2;A0A096LP72;A0A096LNT0	A0A1B0GWJ0;A0A1B0GTJ7;P30566;A0A0A6YY92;A0A096LNY6;P30566-2;A0A1B0GWF8;A0A1B0GTG9	Adenylosuccinate lyase	ADSL	93.673	1761500000	125	27.3469	27.6237	27.4485	27.3548	27.4007	27.6084
	0.698262	-0.306726	E7EMM4;A0A1B0GW68;A0A1B0GUA4;A0A1B0GTM3;A0A1B0GTZ5;Q13510;Q13510-2;A0A1B0GTP7;A0A1B0GUH5;A0A1B0GUE3;A0A1B0GUG1;A0A1B0GUW4;Q13510-3;A0A1B0GU62;A0A1B0GV06;A0A1B0GVG2;A0A1B0GW48;A0A1B0GVJ1;A0A1B0GVE7;A0A1B0GU06;A0A1B0GUB3;A0A1B0GV95;A0A1B0GUJ3;A0A1B0GVA3;A0A1B0GW66;A0A1B0GVC9;A0A1B0GV88	E7EMM4;A0A1B0GW68;A0A1B0GUA4;A0A1B0GTM3;A0A1B0GTZ5;Q13510;Q13510-2;A0A1B0GTP7;A0A1B0GUH5;A0A1B0GUE3;A0A1B0GUG1;A0A1B0GUW4;Q13510-3;A0A1B0GU62;A0A1B0GV06;A0A1B0GVG2	Acid ceramidase;Acid ceramidase subunit alpha;Acid ceramidase subunit beta	ASAH1	43.598	1259600000	53	27.4049	26.8862	27.1421	26.7664	26.6516	27.0952
	0.560379	-0.961521	A0A1B0GTU4;P49023-2;P49023;P49023-3;F5GZ78;A0A1B0GU60;P49023-4;F5H836;A0A1B0GV30	A0A1B0GTU4;P49023-2;P49023;P49023-3;F5GZ78;A0A1B0GU60;P49023-4	Paxillin	PXN	27.847	226950000	25	23.4395	24.5687	24.6988	22.7896	24.5571	22.4758
	0.075294	-0.111332	A0A1B0GU44;A0A1B0GUN8;Q5VZZ6;A0A0J9YX66;E9PC62;A0A0J9YXJ0;O95319-5;O95319-2;O95319;O95319-4;O95319-3;V9GYD9;V9GY47;A0A0J9YXK1	A0A1B0GU44;A0A1B0GUN8;Q5VZZ6;A0A0J9YX66;E9PC62;A0A0J9YXJ0;O95319-5;O95319-2;O95319;O95319-4;O95319-3;V9GYD9	CUGBP Elav-like family member 2	CELF2	26.152	294940000	29	24.2499	23.8949	25.0234	25.054	24.0496	23.7306
	1.09111	-0.467885	A0A1B0GU86;Q03154;A0A1B0GW23;Q03154-4;C9JMV9;Q03154-2;Q03154-3;A0A1B0GV31;A0A1B0GVA5;F8WC59;C9JYZ0;A0A1B0GTG3;A0A1B0GVZ3;A0A1B0GVG0;A0A1B0GU36;A0A1B0GUT4	A0A1B0GU86;Q03154;A0A1B0GW23;Q03154-4;C9JMV9;Q03154-2;Q03154-3	Aminoacylase-1	ACY1;ABHD14A-ACY1	30.423	439120000	42	26.2425	25.664	26.1157	25.3442	25.6667	25.6077
	1.55187	1.16753	A0A1B0GW37;A0A1B0GU97;U3KQE8;A0A1B0GWJ4;A0A0A0MRX8;A0A1B0GWI9;Q5VW27;Q5VW30;A0A2R8Y7V8;Q5VW26;O00712;O00712-4;O00712-5;A0A1B0GVN4;A0A1B0GWB8;A0A1B0GTC1;U3KPY9;A0A087WXP2;Q5W0Y9;O00712-2;Q5VW31;O00712-6;Q14938-6;Q14938-4;S4R308;K7ESG9;K7EKH0;K7EJB0;C9JWJ8;K7EN08;Q14938-5;Q14938-3;Q14938-2;Q14938	A0A1B0GW37;A0A1B0GU97;U3KQE8;A0A1B0GWJ4;A0A0A0MRX8;A0A1B0GWI9;Q5VW27;Q5VW30;A0A2R8Y7V8;Q5VW26;O00712;O00712-4;O00712-5;A0A1B0GVN4;A0A1B0GWB8	Nuclear factor 1;Nuclear factor 1 B-type	NFIB	38.942	206500000	36	23.8792	22.8303	23.8507	24.6319	24.6856	24.7453
	0.397454	-0.620413	A0A1B0GUA3;Q96EK5;A0A1B0GTE6;A0A0D9SFK7;A0A1B0GUH6;A0A1B0GV79;A0A1B0GW21;A0A1B0GU96;A0A1B0GVY9	A0A1B0GUA3;Q96EK5	KIF1-binding protein	KIAA1279	15.273	158660000	27	23.5142	24.359	24.0552	23.7315	22.1589	24.1767
	1.07224	0.842769	A0A1B0GV47;Q7Z4S6-6;Q7Z4S6-5;Q7Z4S6-2;Q7Z4S6;Q7Z4S6-4;Q7Z4S6-3;H0YHT2;H0YI78;H0YIM7;H0YIM6;H0YHG9;Q86VH2-3;Q86VH2-2;Q2M1P5;Q86VH2	A0A1B0GV47;Q7Z4S6-6;Q7Z4S6-5;Q7Z4S6-2;Q7Z4S6;Q7Z4S6-4;Q7Z4S6-3	Kinesin-like protein KIF21A	KIF21A	156.23	992200000	151	25.3322	26.3546	26.364	27.0746	26.5999	26.9046
	1.69701	-0.62988	A0A1B0GW44;A0A1B0GVD5;A0A1B0GWE8;P07339;A0A1B0GV23;A0A1B0GVP3;A0A1B0GU92;A0A1B0GU03;C9JH19;H7C469;H7C1V0;F8WD96;F8W787;A0A1B0GVF1;A0A1B0GV01	A0A1B0GW44;A0A1B0GVD5;A0A1B0GWE8;P07339;A0A1B0GV23;A0A1B0GVP3;A0A1B0GU92;A0A1B0GU03;C9JH19;H7C469	Cathepsin D;Cathepsin D light chain;Cathepsin D heavy chain	CTSD	163.62	5712900000	126	29.5109	29.4578	29.3181	28.5298	29.0776	28.7897
	0.00685055	-0.00367864	A0A1B0GVL3;Q05086-2;Q05086-3;Q05086;A0A0D9SG77;A0A0D9SG63;S4R306;A0A0D9SF91	A0A1B0GVL3;Q05086-2;Q05086-3;Q05086;A0A0D9SG77	Ubiquitin-protein ligase E3A	UBE3A	78.701	756130000	81	25.9445	26.2497	26.1194	26.3722	26.0859	25.8446
	2.03919	0.996323	A0A1B0GWF2;A0A1B0GVQ5;P61764;P61764-2;A0A2R8Y5D4;A0A0D9SG72;A0A1B0GTP9;A0A1B0GW76;A0A0D9SFQ7;A0A0D9SFW6;A0A0D9SEP9;A0A0D9SEH5;A0A096LP33;A0A096LP52;A0A1B0GTD8;A0A1B0GVV9	A0A1B0GWF2;A0A1B0GVQ5;P61764;P61764-2;A0A2R8Y5D4;A0A0D9SG72;A0A1B0GTP9;A0A1B0GW76	Syntaxin-binding protein 1	STXBP1	218.83	3444000000	228	27.3977	27.8812	27.6844	28.5968	28.4093	28.9462
	0.914236	0.742769	C9J6N5;C9JQ40;C9JW51;A0A1C7CYX8;Q9H098;Q9H098-2;C9JYP1;C9J6Y8;X6RET8;C9JP05;C9J3Q3	C9J6N5;C9JQ40;C9JW51;A0A1C7CYX8;Q9H098;Q9H098-2;C9JYP1;C9J6Y8;X6RET8;C9JP05;C9J3Q3	Protein FAM107B	FAM107B	6.4681	167660000	17	23.5574	24.2466	23.4823	24.722	23.9284	24.8642
	1.04877	0.481706	A0A1C7CYX9;Q16555-2;E5RFU4	A0A1C7CYX9;Q16555-2			323.31	82996000000	805	32.2897	32.8312	32.7851	33.3663	33.0467	32.938
	1.06093	-0.631184	I3L1K6;A0A1C7CYY4;P12829;I3L532;I3L3U1;I3L4B1;I3L1R3	I3L1K6;A0A1C7CYY4;P12829;I3L532;I3L3U1	Myosin light chain 4	MYL4	28.159	196160000	23	25.2453	24.3573	25.1159	24.2698	24.3435	24.2117
	0.55386	-0.530204	A0A1W2PPR6;A0A1W2PNP0;Q969N2-4;Q969N2-5;Q969N2;A0A1W2PQN1;F6W983;A0A1W2PP53;A0A1W2PP57;A0A1W2PPC3;A0A1W2PPS0;Q969N2-3;Q969N2-2;Q969N2-6;H7C2Y2;A0A1W2PRZ8;A0A1W2PR92;A0A1W2PQY1;A0A1W2PRH2;A0A1W2PQ52;A0A1W2PPQ7;A0A1W2PSC5;A0A1W2PR73;A0A1W2PPK4;A0A1W2PQ29;A0A1W2PPI8;A0A1W2PP13;A0A1W2PRG1;A0A1W2PNW9;A0A1W2PRV7	A0A1W2PPR6;A0A1W2PNP0;Q969N2-4;Q969N2-5;Q969N2;A0A1W2PQN1;F6W983;A0A1W2PP53;A0A1W2PP57;A0A1W2PPC3;A0A1W2PPS0;Q969N2-3;Q969N2-2;Q969N2-6;H7C2Y2;A0A1W2PRZ8;A0A1W2PR92;A0A1W2PQY1;A0A1W2PRH2;A0A1W2PQ52;A0A1W2PPQ7	GPI transamidase component PIG-T	PIGT	11.097	145410000	24	24.3596	24.2586	24.1267	24.0867	24.1849	22.8827
	0.742809	0.222019	A0A1W2PPH1;P23368;A0A1W2PQH3;A0A1W2PR68;A0A1W2PQT3;A0A1W2PQY8;A0A1W2PQF8;P23368-2;A0A1W2PQ37;A0A1W2PRS2;A0A1W2PRY9;A0A1W2PQH4;A0A1W2PRH1;A0A1W2PPY2;E9PCP1	A0A1W2PPH1;P23368;A0A1W2PQH3;A0A1W2PR68;A0A1W2PQT3;A0A1W2PQY8;A0A1W2PQF8;P23368-2;A0A1W2PQ37	NAD-dependent malic enzyme, mitochondrial	ME2	157.68	2392100000	160	27.5139	27.7382	27.7467	27.8531	27.7108	28.101
	1.58011	-1.11617	A0A1W2PPT5;C9J2Y9;P30876;C9J4M6	A0A1W2PPT5;C9J2Y9;P30876;C9J4M6	DNA-directed RNA polymerase;DNA-directed RNA polymerase II subunit RPB2	POLR2B	48.381	437470000	82	25.5795	26.3327	25.6805	25.1898	24.576	24.4784
	0.134962	0.0588888	A0A1W2PPX5;A0A1W2PQR6;A0A1W2PQB7;A0A1W2PS43;Q14108;A0A1W2PRS1;A0A1W2PPU6;A0A1W2PRF6;Q14108-2;A0A1W2PSE4;A0A1W2PS70;A0A1W2PNX7;D6RDG0	A0A1W2PPX5;A0A1W2PQR6;A0A1W2PQB7;A0A1W2PS43;Q14108;A0A1W2PRS1;A0A1W2PPU6;A0A1W2PRF6	Lysosome membrane protein 2	SCARB2	87.105	3303000000	139	28.6395	28.1123	28.4036	28.4723	28.3443	28.5153
	0.312544	-0.150407	A0A1W2PPZ5;P23193;A0A1W2PRL9;P23193-2;E5RIS7;E5RJ93;E5RK46;A0A1W2PS15;E5RFI1;A0A1W2PPV7;B7Z4S1	A0A1W2PPZ5;P23193;A0A1W2PRL9;P23193-2;E5RIS7	Transcription elongation factor A protein 1	TCEA1	54.695	1203500000	48	26.8089	26.9054	27.0452	27.1299	26.6558	26.5227
	0.355708	1.05927	A0A1W2PQ11;Q02246;A0A1B0GTL7;A0A1W2PQ86;A0A1W2PQJ4;A0A1W2PR60;A0A1W2PPQ9	A0A1W2PQ11;Q02246;A0A1B0GTL7;A0A1W2PQ86;A0A1W2PQJ4	Contactin-2	CNTN2	35.055	236290000	33	22.7217	26.3487	22.6822	24.8187	24.6619	25.4498
	0.514896	0.563762	A0A1W2PQV2;H3BUH9;P23434	A0A1W2PQV2;H3BUH9;P23434	Glycine cleavage system H protein, mitochondrial	GCSH	15.992	367820000	25	24.6998	25.4967	23.8723	25.416	25.2834	25.0607
	0.486429	0.797501	F5GYH1;A0A1W2PRM0;A0A1W2PRL5;A0A1W2PR09;Q8NC96;A0A1W2PRW5;A0A1W2PR27;A0A1W2PPF5;F5H2U7;A0A1W2PRQ7;A0A1W2PNT6;Q8NC96-2	F5GYH1;A0A1W2PRM0;A0A1W2PRL5;A0A1W2PR09;Q8NC96;A0A1W2PRW5;A0A1W2PR27;A0A1W2PPF5;F5H2U7;A0A1W2PRQ7;A0A1W2PNT6;Q8NC96-2	Adaptin ear-binding coat-associated protein 1	NECAP1	13.703	123510000	32	22.7038	22.1714	24.2955	24.4046	23.8598	23.2988
	0.362927	0.78007	K7EMP8;A0A1X7SBR3;A0A1W2PR46;P14136-3;P14136;P14136-2;A0A1X7SCE1;A0A1W2PRT3;K7EJU1;K7EKH9;B4DIR1;K7ELP4;A0A1W2PS58;K7EPI4;K7EKD1;A0A1W2PPA3;K7EPT8	K7EMP8;A0A1X7SBR3;A0A1W2PR46;P14136-3;P14136;P14136-2;A0A1X7SCE1;A0A1W2PRT3;K7EJU1;K7EKH9	Glial fibrillary acidic protein	GFAP	22.199	438580000	34	23.9005	23.6621	23.0682	22.6132	24.9889	25.3688
	1.18933	-0.487799	A0A1W2PRB8;A0A1W2PS69;E9PM72;A0A1W2PRX4;A0A1W2PNW7;A0A1W2PS27;Q9NVC6	A0A1W2PRB8			25.654	341760000	35	25.1393	25.4614	25.4636	25.0876	24.9572	24.5562
	0.0404368	0.00777245	A0A286YF22;O43175;A0A2C9F2M7;A0A286YFA2;A0A286YFL2;A0A286YFM8;A0A286YF78;A0A286YFC8;A0A286YFB2;A0A286YER3;A0A286YF34;A0A286YFE1;A0A286YFF3;A0A286YFK5	A0A286YF22;O43175;A0A2C9F2M7;A0A286YFA2;A0A286YFL2;A0A286YFM8	D-3-phosphoglycerate dehydrogenase	PHGDH	323.31	29898000000	394	31.4631	31.5125	31.6347	31.5816	31.4628	31.5892
	0.540285	0.221811	A0A286YF37;Q9UK22;R4GNH2	A0A286YF37;Q9UK22	F-box only protein 2	FBXO2	38.704	418240000	38	25.2178	24.9083	25.4832	25.3853	25.5655	25.3239
	0.465926	-0.434335	A0A2C9F2P4;A0A286YFF7;P50897;Q5T0S4;A0A286YFE3;A0A286YFL8;E9PIA8;P50897-2;E9PSE5;E9PK48	A0A2C9F2P4;A0A286YFF7;P50897;Q5T0S4;A0A286YFE3;A0A286YFL8;E9PIA8;P50897-2	Palmitoyl-protein thioesterase 1	PPT1	51.298	1309100000	62	26.924	27.218	27.1558	26.9411	27.1644	25.8892
	0.405188	-0.709461	A0A286YFF8;Q7Z3U7-2;Q7Z3U7;Q7Z3U7-6;Q7Z3U7-5;F8VZV1;Q7Z3U7-3	A0A286YFF8;Q7Z3U7-2;Q7Z3U7;Q7Z3U7-6;Q7Z3U7-5;F8VZV1	Protein MON2 homolog	MON2	30.966	270280000	58	24.8576	24.7266	24.7457	24.587	25.0096	22.6048
	0.702483	-0.480089	A0A2Q2TH77;Q08379;Q08379-2;B7ZC06;A0A1W2PQY5;A0A087WYC0;H0Y7B8	A0A2Q2TH77;Q08379;Q08379-2	Golgin subfamily A member 2	GOLGA2	69.209	404660000	66	25.5051	25.2986	25.2854	24.3414	25.3913	24.9161
	0.625466	1.04124	Q5SWX3;A0A2Q3DQE3;Q13555-10;Q13555-3;Q13555-5;Q13555-4;Q13555-7;Q13555-11;Q13555-9;Q13555-2;Q13555-8;Q13555;Q13555-6;Q8WU40;H0Y6G2;E7EQE4;H7C394;D6RHX9;D6RFJ0	Q5SWX3;A0A2Q3DQE3;Q13555-10;Q13555-3;Q13555-5;Q13555-4;Q13555-7;Q13555-11;Q13555-9;Q13555-2;Q13555-8;Q13555;Q13555-6;Q8WU40;H0Y6G2	Calcium/calmodulin-dependent protein kinase type II subunit gamma	CAMK2G	14.48	377730000	38	24.9971	25.0883	22.8046	25.3322	25.233	25.4484
	1.03478	-0.177089	A0A2R8YFS5;A0A2R8Y4A4;A0A2R8Y5G6;A0A0D9SFB3;A0A2R8YF78;A0A2R8YCW1;A0A0D9SG12;A0A2R8YFR4;A0A0D9SF53;O00571;A0A2U3TZJ9;A0A2R8Y645;O00571-2;A0A2R8YDT5;F6S8Q4;A0A2R8Y7T2;A0A2R8YDH3;A0A0J9YVQ7;A0A087WVZ1;A0A2R8YCU0;A0A2R8Y650;A0A2R8Y4D2;A0A087WX09;D6RCM4;Q9NQI0-3;Q9NQI0-2;Q9NQI0-4;Q9NQI0;A0A2R8Y770;A0A2R8YF89;H0Y960	A0A2R8YFS5;A0A2R8Y4A4;A0A2R8Y5G6;A0A0D9SFB3;A0A2R8YF78;A0A2R8YCW1;A0A0D9SG12;A0A2R8YFR4;A0A0D9SF53;O00571;A0A2U3TZJ9;A0A2R8Y645;O00571-2;A0A2R8YDT5;F6S8Q4;A0A2R8Y7T2;A0A2R8YDH3	ATP-dependent RNA helicase DDX3X	DDX3X	167.09	3088800000	213	28.4174	28.31	28.1844	28.2135	28.0956	28.0714
	0.950423	-0.316769	A0A2R8Y7S2;A0A2R8Y4P4;Q9HBD4;P51532-5;P51532-2;P51532-3;P51532-4;P51532;A0A0A0MT49;A0A2R8YGG3;A0A2R8Y440;A0A2R8Y4C5;A0A2R8YG32;A0A2R8Y7F3;A0A2R8Y6N0;A0A2R8YDA1;A0A2R8YF58;A0A2R8YGP5;A0A2R8Y6V2;A0A2R8Y526;A0A2R8Y7Y7;A0A2R8YF80;A0A2R8Y523;A0A2R8YCY3;A0A2R8YFV8;A0A2R8Y5K3;A0A2R8Y4R6;K7EP28;A0A2R8YFK5;K7EQF0;A0A2R8Y7R0;A0A0U1RRF5;A0A2R8Y583;A0A0U1RRD6;A0A2R8Y866;A0A0U1RRF8;A0A0A0MSS5;F6UH26;A0A0U1RQU…	A0A2R8Y7S2;A0A2R8Y4P4;Q9HBD4;P51532-5;P51532-2;P51532-3;P51532-4;P51532;A0A0A0MT49;A0A2R8YGG3;A0A2R8Y440;A0A2R8Y4C5;A0A2R8YG32;A0A2R8Y7F3;A0A2R8Y6N0;A0A2R8YDA1;A0A2R8YF58;A0A2R8YGP5;A0A2R8Y6V2;A0A2R8Y526;A0A2R8Y7Y7;A0A2R8YF80	Transcription activator BRG1	SMARCA4	99.229	1282500000	140	27.1133	27.1444	27.1609	27.1331	26.6802	26.655
	0.338786	-0.628361	A0A2R8Y566;Q9P260;Q9P260-2;A0A075B785	A0A2R8Y566;Q9P260;Q9P260-2;A0A075B785	LisH domain and HEAT repeat-containing protein KIAA1468	KIAA1468	16.748	61003000	30	24.3197	22.9262	22.4924	21.9152	23.6624	22.2756
	0.268506	0.0642395	A0A2R8YCH5;A0A2R8Y5A3;P35222;A0A2R8Y804;A0A2R8Y543;B4DGU4;A0A2R8Y750;A0A2R8Y7Z0;A0A2R8Y5C3;A0A2R8Y5Z1;A0A2R8Y6G0;A0A2R8Y815;E7EMJ5;A0A2R8YG06;E9PDF9;E7EV28;C9IZ65	A0A2R8YCH5;A0A2R8Y5A3;P35222;A0A2R8Y804;A0A2R8Y543;B4DGU4;A0A2R8Y750;A0A2R8Y7Z0;A0A2R8Y5C3;A0A2R8Y5Z1	Catenin beta-1	CTNNB1	300.08	6891000000	324	29.2706	29.3777	29.2558	29.5346	29.3214	29.2408
	0.997314	0.414211	A0A2R8Y5S7;P35241;P35241-5;A0A2R8Y7M3;P35241-4;P35241-2;P35241-3;A0A2R8Y5P0;A0A2R8Y4H6;E9PKN5	A0A2R8Y5S7;P35241;P35241-5;A0A2R8Y7M3;P35241-4	Radixin	RDX	186.33	3836600000	179	28.1804	28.4947	28.3124	28.6653	28.492	29.0729
	0.717133	0.332727	A0A2R8YDQ9;A0A2R8Y6Y7;Q9P2R7-2;Q9P2R7;Q5T9Q5;A0A0U1RQF8;A0A2R8Y5P6;A0A2R8Y6E6;Q5T9Q8;A0A0U1RQL1;A0A0U1RRI1;A0A0U1RQU7;A0A2R8Y5P4	A0A2R8YDQ9;A0A2R8Y6Y7;Q9P2R7-2;Q9P2R7;Q5T9Q5	Succinyl-CoA ligase [ADP-forming] subunit beta, mitochondrial	SUCLA2	99.36	2030100000	104	27.3589	27.0993	27.4157	27.6243	27.2975	27.9503
	0.29085	-0.18234	A0A2R8Y811;P62263;E5RH77	A0A2R8Y811;P62263;E5RH77	40S ribosomal protein S14	RPS14	56.611	5624800000	88	28.9895	29.1268	29.2911	29.4295	28.7287	28.7023
	0.337268	0.311206	A0A2R8Y851;P62273;P62273-2;A0A2R8Y6P7;A0A087WTT6	A0A2R8Y851;P62273;P62273-2	40S ribosomal protein S29	RPS29	27.312	1046600000	58	25.9549	26.7171	26.9062	27.0363	26.3475	27.1281
	1.58096	-0.480709	A0A2R8Y855;Q969G3-2;Q969G3;A0A2R8Y765;A0A2R8Y7U4;A0A2U3TZQ7;A0A2R8Y7I9;A0A2R8Y4T4;B4DGM3;Q969G3-6;Q969G3-5;Q969G3-3;Q969G3-4;J3QKS7;A0A2R8YES3;J3QR61;K7EMQ8;H7C048;J3KT85;A0A2R8YD78;J3QKX6;A0A2R8YFC8;A0A2R8YEB8;A0A2R8YDQ4;J3QL66	A0A2R8Y855;Q969G3-2;Q969G3;A0A2R8Y765;A0A2R8Y7U4;A0A2U3TZQ7;A0A2R8Y7I9;A0A2R8Y4T4;B4DGM3;Q969G3-6;Q969G3-5;Q969G3-3;Q969G3-4;J3QKS7;A0A2R8YES3;J3QR61;K7EMQ8	SWI/SNF-related matrix-associated actin-dependent regulator of chromatin subfamily E member 1	SMARCE1	77.668	666710000	76	26.1274	26.258	26.2575	25.5751	25.9973	25.6284
	0.584999	0.217072	A0A2R8Y891;P08237;P08237-3;P08237-2;F8VZI0;F8VX13;F8VNX2;F8VZQ1;F8VP00;F8VW30;F8VSL1;H0YHB8;F8W1J8;H0YIS9;F8VSF7;F8VUB8;F8VYK8;F8VTQ3;F8VVE3	A0A2R8Y891;P08237;P08237-3;P08237-2;F8VZI0	ATP-dependent 6-phosphofructokinase, muscle type	PFKM	323.31	6240200000	245	29.1829	29.068	29.0358	29.5928	29.0408	29.3043
	0.12725	0.0889238	A0A2R8YDE6;Q9UBN7;Q9UBN7-2;E7EP63;E7ER52;A6NDI8;E7EPS2;A0A2R8Y5Z4;A0A2R8YD35;C9J172;Q9BRX7;A0A2R8Y4G2	A0A2R8YDE6;Q9UBN7;Q9UBN7-2	Histone deacetylase 6	HDAC6	53.108	226830000	38	24.2335	24.8459	24.3095	24.7465	24.2156	24.6935
	1.279	0.761606	A0A2R8YDT1;P15104	A0A2R8YDT1;P15104	Glutamine synthetase	GLUL	292.31	948030000	66	25.8831	26.1602	26.6027	27.2668	26.6339	27.0301
	0.550657	-0.562366	A0A2R8YEL6;P48506;E1CEI4;B4E2I4;A0A0C4DGB2;A0A2R8Y648;D6RGF8	A0A2R8YEL6;P48506;E1CEI4;B4E2I4;A0A0C4DGB2	Glutamate--cysteine ligase catalytic subunit	GCLC	12.868	182400000	28	24.058	23.9265	24.7285	23.07	24.3695	23.5863
	0.911934	-0.290813	B1ALK7;A0A2R8YG42;Q14155-1;Q14155-5;Q14155-6;Q14155-2;Q14155-3;Q14155;E7EUY6;E9PDQ5;Q15052-2;Q15052;C9JDI6;B1ANY6;E7ENL8;E7EU80;C9JAD7;F6SJA5	B1ALK7;A0A2R8YG42;Q14155-1;Q14155-5;Q14155-6;Q14155-2;Q14155-3;Q14155;E7EUY6;E9PDQ5	Rho guanine nucleotide exchange factor 7	ARHGEF7	85.184	817970000	94	26.5311	26.5002	26.3807	26.107	26.4534	25.9792
	0.134069	-0.0678495	A0A2R8YGD1;O14773-2;O14773;A0A2R8Y7U1;A0A2R8YD45;A0A2R8Y7I4;A0A2R8YD72;A0A2R8YDY1	A0A2R8YGD1;O14773-2;O14773;A0A2R8Y7U1;A0A2R8YD45	Tripeptidyl-peptidase 1	TPP1	65.212	2621800000	60	27.9853	27.7688	28.0169	27.8983	27.5435	28.1256
	1.05783	0.51945	A0A2U3TZH3;Q05639;A0A2R8Y488;A0A2R8Y660;A0A2R8YDN5	A0A2U3TZH3;Q05639	Elongation factor 1-alpha 2	EEF1A2	100.61	3663900000	87	27.7069	28.4018	28.3416	28.7935	28.6083	28.6069
	0.375574	-0.0512943	A0A3B3IRT8;P43307;C9J3L8;C9J5W0;E9PAL7;C9IZQ1;P43307-2;C9JBX5	A0A3B3IRT8;P43307;C9J3L8;C9J5W0;E9PAL7;C9IZQ1;P43307-2	Translocon-associated protein subunit alpha	SSR1	27.801	1358200000	42	27.2177	27.0748	27.1115	27.008	27.1294	27.1128
	0.447954	-1.02079	A0A3B3IRV5;Q9NRV9;H0YG71;F5GWX2	A0A3B3IRV5;Q9NRV9;H0YG71;F5GWX2	Heme-binding protein 1	HEBP1	46.234	340600000	36	25.7376	25.2801	25.0536	25.3926	22.421	25.1954
	0.0694228	-0.0819721	A0A3B3IRX8;E7EV01;O15484	A0A3B3IRX8;E7EV01;O15484	Calpain-5	CAPN5	7.083	57826000	17	23.2678	22.4313	23.8239	23.1245	23.214	22.9387
	0.0110864	-0.0390231	A0A3B3ISS6;Q14956-2;Q14956	A0A3B3ISS6;Q14956-2;Q14956	Transmembrane glycoprotein NMB	GPNMB	12.552	628900000	19	26.7275	23.7117	23.9602	24.6982	25.9047	23.6795
	0.111057	0.0694695	A0A3B3ISZ0;Q53H12;E9PC15;A0A3B3ITD0;E9PG39;A0A3B3ISY9;A0A3B3ITX7;A0A3B3ITV0;A0A0G2JLG5;A0A0G2JLD0;A0A3B3IUC9;A0A3B3IS09;F8WDD1;A0A3B3IRM6;Q53H12-2	A0A3B3ISZ0;Q53H12;E9PC15;A0A3B3ITD0;E9PG39;A0A3B3ISY9;A0A3B3ITX7	Acylglycerol kinase, mitochondrial	AGK	30.395	912070000	63	26.3579	26.6514	26.2561	26.7676	26.5865	26.1197
	0.653714	1.12685	A0A3B3IUA1;A0A3B3IU40;A0A3B3IT28;A0A3B3ITE5;A0A3B3ITF7;A0A3B3ITW6;Q12756;Q12756-3;Q12756-2;A0A3B3ITK3;F8W8V9;H7C3Y8;H7C0K6	A0A3B3IUA1;A0A3B3IU40;A0A3B3IT28;A0A3B3ITE5;A0A3B3ITF7;A0A3B3ITW6;Q12756;Q12756-3;Q12756-2;A0A3B3ITK3;F8W8V9	Kinesin-like protein KIF1A;Kinesin-like protein	KIF1A	50.446	305110000	57	23.104	24.7477	24.2299	26.222	25.1326	24.1076
	0.607722	-1.63557	A0A3B3IU45;A0A3B3IT92;P33991;A0A3B3IS57;A0A3B3ITP6;E5RG31;A0A3B3IRR8;Q9UJA3-2;Q9UJA3-3;Q9UJA3;Q9UJA3-4	A0A3B3IU45;A0A3B3IT92;P33991;A0A3B3IS57;A0A3B3ITP6;E5RG31	DNA replication licensing factor MCM4	MCM4	114.23	916430000	116	26.8819	27.418	26.4637	26.4541	26.4665	22.9363
	0.703075	0.370839	A0A3B3ITT5;P47914	A0A3B3ITT5;P47914	60S ribosomal protein L29	RPL29	6.8416	2516800000	35	27.6904	27.7614	27.7151	28.1589	27.649	28.4715
	0.766327	-0.386286	E9PN17;A0A3B3ITX4;O75964;A0A3B3IRW3	E9PN17;A0A3B3ITX4;O75964	ATP synthase subunit g, mitochondrial	ATP5L	20.464	1750700000	51	27.215	27.3191	27.7156	27.1077	27.2869	26.6962
	0.803829	0.379354	A0A3B3IU24;Q92743;H0Y7G9	A0A3B3IU24;Q92743;H0Y7G9	Serine protease HTRA1	HTRA1	12.5	74498000	18	22.8428	23.3652	23.1191	23.1843	23.7125	23.5684
	1.09044	0.586697	F8W717;A0A3B3IU69;O00423;O00423-3;G3V3N9;G3V500;G3V497;G3V4H6;G3V538;G3V4U5;G3V3J1;G3V5C8;H0YJK4;H0YJY3	F8W717;A0A3B3IU69;O00423;O00423-3;G3V3N9;G3V500	Echinoderm microtubule-associated protein-like 1	EML1	25.219	484610000	57	25.3471	25.2398	24.726	25.905	25.3662	25.8018
	0.0666868	-0.0343463	A0A3B3IUA2;B1AHD1;P55769;A0A3B3IRU2;A0A3B3ISH1;A0A3B3ISK4	A0A3B3IUA2;B1AHD1;P55769;A0A3B3IRU2	NHP2-like protein 1;NHP2-like protein 1, N-terminally processed	NHP2L1	17.077	1873300000	39	27.1176	27.3405	27.3278	27.4184	26.9002	27.3641
	0.34373	0.487555	A0A3B3IUB1;Q13144;A0A3B3ITG6;A0A3B3ISX3;A0A3B3ISV1;A0A3B3ITQ2;A0A3B3IUF2;A0A3B3ISM8	A0A3B3IUB1;Q13144;A0A3B3ITG6	Translation initiation factor eIF-2B subunit epsilon	EIF2B5	10.473	173470000	32	22.5336	24.1473	24.1508	24.3693	23.6309	24.2943
	1.56835	0.807196	A0A3B3IUB5;Q8TCT9-5;Q8TCT9;A0A0S2Z6F0;A0A075B6F6;A0A3B3IT72;A0A0C4DGU3	A0A3B3IUB5;Q8TCT9-5;Q8TCT9;A0A0S2Z6F0;A0A075B6F6;A0A3B3IT72	Minor histocompatibility antigen H13	HM13	43.571	463170000	37	25.184	24.6633	24.9258	26.0946	25.5881	25.512
	0.332157	-0.135563	A0AVT1;A0AVT1-2;A0AVT1-3;H0Y8S8;A0AVT1-4;H0Y9U5	A0AVT1;A0AVT1-2	Ubiquitin-like modifier-activating enzyme 6	UBA6	125	2383200000	229	27.7253	28.0035	27.8399	27.8621	27.8743	27.4257
	0.893605	0.406567	A0MZ66;A0MZ66-3;A0MZ66-4;A0MZ66-6;A0MZ66-5;A0MZ66-8;A0MZ66-2;A0MZ66-7	A0MZ66;A0MZ66-3;A0MZ66-4;A0MZ66-6;A0MZ66-5;A0MZ66-8;A0MZ66-2	Shootin-1	KIAA1598	128.55	939080000	96	25.686	26.0677	26.0265	26.479	26.5346	25.9862
	1.08646	-0.460768	A1L0T0;M0R026;E9PJS0;M0R1B5;E9PL44;M0QZX5	A1L0T0;M0R026	Acetolactate synthase-like protein	ILVBL	162.05	1428300000	113	27.5368	27.3163	27.5239	26.7073	27.3449	26.9426
	1.39736	-0.447844	A1X283;G3V144;A0A1B0GUF2;H0Y507;Q5TCZ1-3;Q5TCZ1;Q5TCZ1-2	A1X283;G3V144;A0A1B0GUF2	SH3 and PX domain-containing protein 2B	SH3PXD2B	40.394	323610000	50	25.226	25.18	25.1487	24.5071	25.0127	24.6914
	1.04197	-0.491219	A2RRP1;A2RRP1-2;H0Y5G7;H7C1U4;H7BZU5;C9JCM7	A2RRP1;A2RRP1-2;H0Y5G7	Neuroblastoma-amplified sequence	NBAS	39.12	187780000	52	24.8036	24.3846	24.0765	23.8142	24.0501	23.9268
	0.47639	-0.0708205	A5YKK6;A5YKK6-2;A5YKK6-3;A5YKK6-4;H3BVC9;H3BMZ2;H3BNB1;H3BR89;H3BMH0;H3BTH2	A5YKK6;A5YKK6-2;A5YKK6-3;A5YKK6-4	CCR4-NOT transcription complex subunit 1	CNOT1	102.75	946140000	181	26.6429	26.7277	26.5959	26.6861	26.5518	26.5162
	0.568765	0.467578	H3BTL1;Q9GZQ8;A6NCE7;H3BTE7	H3BTL1;Q9GZQ8;A6NCE7	Microtubule-associated proteins 1A/1B light chain 3B;Microtubule-associated proteins 1A/1B light chain 3 beta 2	MAP1LC3B;MAP1LC3B2	4.6374	3887300000	33	27.8356	28.6847	28.8053	28.534	28.972	29.2223
	0.363331	-0.575944	A6NDG6;H3BV17	A6NDG6	Phosphoglycolate phosphatase	PGP	13.05	151000000	19	23.8526	24.3133	23.7906	23.4944	24.4746	22.2597
	0.0291781	0.0312557	A6NE02	A6NE02	BTB/POZ domain-containing protein 17	BTBD17	22.303	164150000	25	24.2548	23.808	23.7512	24.4324	24.1279	23.3474
	0.103778	0.285288	K7EIJ0;K7ENL2;A6NG10;K7EMC9;Q969T9-2;Q969T9;K7EIN1;K7ESN4	K7EIJ0;K7ENL2;A6NG10;K7EMC9;Q969T9-2;Q969T9	WW domain-binding protein 2	WBP2	9.2147	235320000	14	23.1544	24.6318	22.4773	22.1905	24.4409	24.4879
	1.71965	-0.438564	A6NHR9-2;A6NHR9;J3KTL8;A6NHR9-3;A0A2R8YE92;A0A2R8YCU7;J3QSH1;J3KRK8	A6NHR9-2;A6NHR9;J3KTL8	Structural maintenance of chromosomes flexible hinge domain-containing protein 1	SMCHD1	115.46	712220000	142	26.3155	26.5473	26.4654	26.1625	26.0105	25.8396
	0.454525	-0.209687	A6NMH6;Q92599-2;Q92599-4;Q92599;A6NFQ9;F8W8I8;A0A087X142;Q92599-3;C9J4G8;C9JV02;A0A0A0MRP8	A6NMH6;Q92599-2;Q92599-4;Q92599;A6NFQ9;F8W8I8;A0A087X142;Q92599-3	Septin-8	2008-09-01	47.131	636130000	54	26.2884	25.9698	25.9382	25.5532	25.8955	26.1186
	0.377953	-0.174873	E9PJK1;E9PRJ8;H0YDL9;H0YDJ9;E9PIF1;A6NMH8;P60033;E9PM31;H0YEE2	E9PJK1;E9PRJ8;H0YDL9;H0YDJ9;E9PIF1;A6NMH8;P60033;E9PM31;H0YEE2	Tetraspanin;CD81 antigen	CD81	82.131	506990000	40	25.6718	25.663	25.7616	25.1427	25.7493	25.6798
	0.0161775	-0.0772222	A6NMQ3;Q5T5H1;O43768-2;O43768;O43768-9;O43768-3;O43768-4;A0A1W2PRU0;O43768-6;O43768-5;O43768-7;O43768-8	A6NMQ3;Q5T5H1;O43768-2;O43768;O43768-9;O43768-3;O43768-4;A0A1W2PRU0;O43768-6;O43768-5;O43768-7;O43768-8	Alpha-endosulfine	ENSA	150.97	877660000	37	26.7435	23.4404	26.4982	26.8492	26.4539	23.1473
	0.366889	0.113847	A8K878;P55145;H7C2D6	A8K878;P55145	Mesencephalic astrocyte-derived neurotrophic factor	MANF	101.33	3256400000	108	28.1457	28.0025	28.3066	28.4561	28.1786	28.1617
	0.234305	-0.0641276	A8MQB8;G3V0J0;Q06787-8;Q06787-2;Q06787-9;Q06787-6;Q06787-4;Q06787-5;Q06787-7;Q06787-3;Q06787;R9WNI0;A0A087WXI3;Q06787-11;Q06787-10;Q8IXW7;A0A087WY29;A0A087X1M7;A0A087WWU4;A0A087WWR6	A8MQB8;G3V0J0;Q06787-8;Q06787-2;Q06787-9;Q06787-6;Q06787-4;Q06787-5;Q06787-7;Q06787-3;Q06787;R9WNI0;A0A087WXI3;Q06787-11;Q06787-10;Q8IXW7	Fragile X mental retardation protein 1	FMR1	59.183	551040000	72	25.8073	25.8591	25.6959	25.617	25.6376	25.9152
	0.863137	0.534586	A8MT40;Q8NCN5;H3BQG3;B7ZAR9;Q8NCN5-2;H3BUH3	A8MT40;Q8NCN5;H3BQG3	Pyruvate dehydrogenase phosphatase regulatory subunit, mitochondrial	PDPR	23.218	104360000	37	22.5186	23.0461	23.5089	23.4936	23.5796	23.6042
	0.643051	0.775699	A8MUA9;A8MU27;P55854;P55854-2	A8MUA9;A8MU27;P55854;P55854-2	Small ubiquitin-related modifier 3	SUMO3	18.774	207790000	20	23.5406	24.7674	23.3191	24.6644	24.1147	25.1752
	0.279244	0.215949	H7BY10;K7EJV9;K7ERT8;A8MUS3;P62750;K7EMA7	H7BY10;K7EJV9;K7ERT8;A8MUS3;P62750;K7EMA7	60S ribosomal protein L23a	RPL23A	50.957	5944800000	103	28.6954	29.2336	29.2979	29.4853	28.804	29.5854
	0.298307	0.288451	A8MXP9;A0A0R4J2E8;P43243;D6REM6;D6R991;H0Y8T4;B3KM87;P43243-2;Q68E03;D6RCM3;D6REK4;D6R8Z5;D6RBI2;D6RBK5;D6RE02;D6RIA2;D6RB45;A0A1B0GX04;D6R9F3;D6RBS2;D6RAM9;D6RAY2	A8MXP9;A0A0R4J2E8;P43243;D6REM6;D6R991	Matrin-3	MATR3	323.31	11779000000	283	29.3075	30.2277	30.2224	30.5721	29.7392	30.3116
	0.128901	0.132504	A9Z1X7;Q8IYB3;Q8IYB3-2;E9PCT1;M0R088;M0R1E7;M0QXG5	A9Z1X7;Q8IYB3;Q8IYB3-2;E9PCT1;M0R088	Serine/arginine repetitive matrix protein 1	SRRM1	35.653	435470000	64	24.7015	25.8871	25.3179	25.5876	25.1174	25.5989
	0.183778	0.0600643	B0QY89;Q9Y262-2;Q9Y262;B0QY90;C9JHP4;C9K0Q7;H7C3A0;H0Y7E6	B0QY89;Q9Y262-2;Q9Y262;B0QY90	Eukaryotic translation initiation factor 3 subunit L	EIF3L	121.21	3506400000	179	28.7032	28.3377	28.3983	28.5761	28.4367	28.6066
	0.230696	0.159488	B0QYK0;Q01844-6;Q01844-3;Q01844;Q01844-5;H7BY36;A0A0D9SFL3;C9JGE3;Q01844-2;Q01844-4	B0QYK0;Q01844-6;Q01844-3;Q01844;Q01844-5;H7BY36;A0A0D9SFL3;C9JGE3;Q01844-2	RNA-binding protein EWS	EWSR1	35.076	2163000000	41	27.2399	27.786	27.5838	28.1266	27.553	27.4087
	0.541961	0.286212	B1AHL2;P23142-4;P23142-2;P23142-3;B1AHM7;H7C1M6;B1AHM9;B1AHN3;B1AHM8;B1AHM6	B1AHL2;P23142-4;P23142-2;P23142-3	Fibulin-1	FBLN1	278.88	7039900000	198	29.544	29.1975	29.0658	29.3748	29.3667	29.9245
	0.165574	0.172373	B1AJY7;O75832;B1AJY5;O75832-2;B1AJY6	B1AJY7;O75832;B1AJY5;O75832-2	26S proteasome non-ATPase regulatory subunit 10	PSMD10	39.154	1084400000	69	26.084	26.4801	26.6962	27.051	26.8186	25.9078
	0.0426223	0.0148977	B1AK81;Q92643-2;Q92643;A6NEM5	B1AK81;Q92643-2;Q92643;A6NEM5	GPI-anchor transamidase	PIGK	14.798	166480000	30	24.1723	24.0101	24.1709	24.1937	23.9258	24.2784
	0.0780733	-0.0347366	B1ALA9;P60891;P60891-2;A0A2R8Y7H4;B7ZB02	B1ALA9;P60891;P60891-2;A0A2R8Y7H4	Ribose-phosphate pyrophosphokinase 1	PRPS1	221.66	4284600000	167	28.6445	28.7355	28.6782	28.3493	28.8585	28.7463
	0.607597	0.258303	B1AMS2;Q14141-2;Q14141-4;Q14141;Q14141-3	B1AMS2;Q14141-2;Q14141-4;Q14141	Septin-6	2006-09-01	98.123	789230000	72	25.7591	26.1365	26.1756	26.5501	26.1951	26.101
	0.98807	0.472808	B1ANH5;Q16774;B1ANH0;Q16774-2;B1ANG9;B1ANH6;B1ANH2;B1ANH3;Q16774-3	B1ANH5;Q16774;B1ANH0;Q16774-2;B1ANG9;B1ANH6;B1ANH2;B1ANH3;Q16774-3	Guanylate kinase	GUK1	51.033	639460000	38	25.3496	25.946	25.6893	25.9931	25.9894	26.4208
	0.0541383	-0.0340474	B1ANR0;Q13310-2;Q13310;Q13310-3;H0Y5F5;B1ANR1;H0YCC8;H0YEU6;H0YEQ8;H0Y6X6;H0YER0;P0CB38	B1ANR0;Q13310-2;Q13310;Q13310-3;H0Y5F5	Polyadenylate-binding protein;Polyadenylate-binding protein 4	PABPC4	36.461	1211500000	77	26.9143	26.7724	26.9025	27.1108	26.4139	26.9625
	0.26614	0.244096	G3V4W0;B4DY08;B2R5W2;P07910-2;G3V4C1;P07910-4;G3V2D6;P07910-3;G3V251;G3V5X6;G3V3K6;G3V5V7;B4DSU6;A0A0G2JPF8;A0A0G2JNQ3;P0DMR1;O60812;B7ZW38;B2RXH8;G3V4M8;G3V2H6	G3V4W0;B4DY08;B2R5W2;P07910-2;G3V4C1;P07910-4;G3V2D6;P07910-3;G3V251		HNRNPC	82.146	15660000000	229	29.7494	30.8074	30.6386	30.8344	30.3181	30.7752
	1.11548	-0.221677	B3KS98;O15372;A0A087WZK9;E5RJT0;E5RGU4;E5RFH0;E5RFW7	B3KS98;O15372;A0A087WZK9;E5RJT0	Eukaryotic translation initiation factor 3 subunit H	EIF3H	73.988	1718400000	97	27.4114	27.5159	27.6444	27.3629	27.3709	27.1727
	1.37407	0.59017	B4DJV2;O75390;A0A0C4DGI3;H0YIC4;F8VPA1;H0YH82;F8VRP1;F8VX68;F8VPF9;F8W1S4;F8W4S1;F8VRI6;F8VTT8;F8VZK9;F8VX07;F8VR34;F8W642;F8VWQ5;F8VU34	B4DJV2;O75390;A0A0C4DGI3	Citrate synthase;Citrate synthase, mitochondrial	CS	190.95	8545900000	214	29.0958	29.4181	29.4123	29.8422	29.6371	30.2174
	0.95067	0.408962	B4DKY1;P49589-2;P49589;P49589-3;C9JLN0;E9PRS8;E9PLP0	B4DKY1;P49589-2;P49589;P49589-3	Cysteine--tRNA ligase, cytoplasmic	CARS	99.765	1637300000	139	26.7465	27.2018	27.2147	27.421	27.2628	27.7061
	0.203445	0.133204	B4DLN1;Q9UBX3;Q9UBX3-2;I3L1E8	B4DLN1			41.759	1081900000	55	26.6555	26.5793	26.7542	27.1068	26.307	26.9749
	0.162341	0.123538	B4DR61;P61619;P61619-3;F8W776;Q8TC24;Q9H9S3-2;Q9H9S3-3;Q9H9S3;H7C1Q9;C9JXC6;H7C069;A6NK38;F2Z2C7;A6NIF9;C9JJV4	B4DR61;P61619;P61619-3	Protein transport protein Sec61 subunit alpha isoform 1	SEC61A1	29.383	1042300000	49	27.0258	26.3252	26.7216	26.9222	26.4238	27.0972
	0.0462265	0.0261885	H0Y630;B4DR80;Q9Y6E0-2;Q9Y6E0;Q5JV98;Q5JV99	H0Y630;B4DR80;Q9Y6E0-2;Q9Y6E0;Q5JV98	Serine/threonine-protein kinase 24;Serine/threonine-protein kinase 24 36 kDa subunit;Serine/threonine-protein kinase 24 12 kDa subunit	STK24	21.492	171450000	39	24.4859	24.0201	23.9913	24.0056	24.3828	24.1874
	2.44892	-0.383643	B4DUC8;Q13126;Q13126-4;Q13126-3;Q13126-2;J3QSB7;Q13126-7;Q13126-6;Q13126-5;F2Z2F3;F8WES2;A0A2R8Y4K0;J3KRN1	B4DUC8;Q13126;Q13126-4;Q13126-3;Q13126-2;J3QSB7;Q13126-7;Q13126-6;Q13126-5	S-methyl-5-thioadenosine phosphorylase;Purine nucleoside phosphorylase	MTAP	149.26	2002400000	112	27.9021	27.7641	27.8448	27.3588	27.487	27.5142
	0.0507285	-0.0297235	B4DUT8;Q99439;B4DDF4;Q99439-2;A0A087X271;A0A087X1X5;H3BVI6;K7ES69;H3BQH0;U3KPS3;A0A087WV51	B4DUT8;Q99439;B4DDF4;Q99439-2;A0A087X271;A0A087X1X5;H3BVI6	Calponin;Calponin-2	CNN2	26.04	1157800000	66	27.0568	26.4796	27.0555	26.9074	26.8798	26.7156
	0.762248	0.175868	B4DXZ6;P51114;P51114-2;P51114-3;E9PFF5;E7EU85;C9JAJ4;C9JY20;C9JZE0;H7C4S4;C9IZ22	B4DXZ6;P51114;P51114-2;P51114-3;E9PFF5;E7EU85	Fragile X mental retardation syndrome-related protein 1	FXR1	57.458	1452100000	111	26.9807	27.0261	26.9867	26.9663	27.2469	27.3079
	2.08004	-0.786952	B4E0Y9;Q9P289;Q8NBY1;Q9P289-2;Q9P289-3;C9JJV0	B4E0Y9;Q9P289;Q8NBY1;Q9P289-2;Q9P289-3	Serine/threonine-protein kinase 26	STK26	25.632	559990000	55	26.3744	26.0798	26.0967	25.1828	25.6347	25.3726
	0.0861966	-0.0555274	B5MDU6;Q9H6V9;Q9H6V9-2;B5MCU4;A0A0A0MSH6;Q9H6V9-4;Q9H6V9-3;C9JHU6;C9JUM0;B4DRG3;B5MCE2	B5MDU6;Q9H6V9;Q9H6V9-2;B5MCU4;A0A0A0MSH6;Q9H6V9-4;Q9H6V9-3;C9JHU6;C9JUM0;B4DRG3	UPF0554 protein C2orf43	LDAH;C2orf43;FLJ21820	21.77	188760000	27	23.9793	24.3949	24.5326	23.9485	24.3121	24.4796
	1.60628	-0.703701	E7EW69;E7EX04;B5ME97;Q9P0V9;Q9P0V9-2;Q9P0V9-3;F5H1F2;C9JEW2;C9JNR7;F5GYV2;C9JEQ7	E7EW69;E7EX04;B5ME97;Q9P0V9;Q9P0V9-2;Q9P0V9-3	Septin-10	2010-09-01	86.184	489110000	59	26.0805	25.9132	25.6158	25.0919	25.4509	24.9556
	0.385738	-0.700452	B7Z3Z9;E7EPM6;P33121;P33121-2;P33121-3;H0Y9U7;D6RER0	B7Z3Z9;E7EPM6;P33121;P33121-2;P33121-3;H0Y9U7	Long-chain-fatty-acid--CoA ligase 1	ACSL1	7.739	118200000	8	23.6084	23.5638	23.6841	23.547	23.8096	21.3985
	0.647754	0.526341	B7Z4W5;Q16773-2;Q16773;Q5T278;Q16773-3;Q5T277;Q5T276	B7Z4W5;Q16773-2;Q16773	Kynurenine--oxoglutarate transaminase 1	CCBL1	15.445	203930000	27	23.952	24.7329	23.4912	24.6573	24.6301	24.4677
	0.0132499	0.0363178	B7Z6J7;O75175;H7C148;A0A2R8Y7Z8;A0A0G2JNJ7;H7C3F5;A0A2H2FJL5;A0A087X0F9;A0A2R8Y4W0;H0Y5X7	B7Z6J7;O75175;H7C148;A0A2R8Y7Z8;A0A0G2JNJ7	CCR4-NOT transcription complex subunit 3	CNOT3	15.514	145400000	25	24.4653	24.1328	21.6604	23.8032	23.4388	23.1255
	0.0942746	0.048872	B7Z7F3;Q9H6Z4-3;Q9H6Z4-2;Q9H6Z4;K7EIJ4;K7ESQ0;K7ENJ2;K7EID7;K7ENB9;K7EPW1;K7EN31;K7EMH9;K7EMT3	B7Z7F3;Q9H6Z4-3;Q9H6Z4-2;Q9H6Z4	Ran-binding protein 3	RANBP3	64.65	1193400000	98	26.7987	26.8954	26.8973	27.0501	26.5515	27.1364
	0.672875	0.151381	B7Z9I1;Q5T4U5;P11310;P11310-2;E9PJM9;H0YDT5;E9PRX4	B7Z9I1;Q5T4U5;P11310;P11310-2	Medium-chain specific acyl-CoA dehydrogenase, mitochondrial	ACADM	168.69	1713400000	107	27.1841	27.4947	27.2691	27.5505	27.407	27.4446
	0.0415989	0.0128613	B7ZC38;Q9NR46;B7ZC39;Q9NR46-2;F8WFB9;G5E9J1;H7C1Z6	B7ZC38;Q9NR46;B7ZC39;Q9NR46-2	Endophilin-B2	SH3GLB2	40.622	574890000	61	25.8343	25.8423	25.7909	25.6883	25.7812	26.0364
	1.10082	0.564668	B7ZM87;O75044;A0A075B7B5;A0A286YEY3;P0DMP2;Q5VZB4;P0DJJ0;E9PDX4;A0A075B7C8;A0A075B743;A0A075B7E9;A0A087WW56;G5EA48;Q7Z6B7-2;Q7Z6B7;A0A087X1G6;A0A075B7E6;A0A087X0L1	B7ZM87;O75044;A0A075B7B5	SLIT-ROBO Rho GTPase-activating protein 2	SRGAP2	37.956	312690000	55	24.3007	24.5594	24.9282	25.3071	24.8447	25.3306
	1.65777	-0.731681	B8ZZ77;Q9H2H8;Q9H2H8-2;H7BZ14;C9K058;F8WC82;C9J4N2	B8ZZ77;Q9H2H8;Q9H2H8-2;H7BZ14;C9K058	Peptidyl-prolyl cis-trans isomerase-like 3;Peptidyl-prolyl cis-trans isomerase	PPIL3	25.594	313990000	31	25.1209	25.0853	25.5065	24.5217	24.756	24.24
	1.07203	-0.513638	B8ZZ87;Q6NZ67;H7C173;Q6P582;H7BZ50;H7C202;H7C293	B8ZZ87;Q6NZ67;H7C173;Q6P582;H7BZ50;H7C202	Mitotic-spindle organizing protein 2B;Mitotic-spindle organizing protein 2A	MZT2B;MZT2A	16.563	235050000	31	24.5389	25.0764	24.8486	24.3331	24.5758	24.0141
	0.066537	0.0538909	B8ZZN6;P63165;B8ZZJ0;B9A032;B8ZZ67;G2XKQ0;P63165-2	B8ZZN6;P63165;B8ZZJ0;B9A032	Small ubiquitin-related modifier 1	SUMO1	38.59	702470000	37	25.7129	26.2082	26.3968	26.3245	25.7707	26.3844
	0.392222	-2.22045	B8ZZQ6;P06454-2;P06454	B8ZZQ6;P06454-2;P06454	Prothymosin alpha;Prothymosin alpha, N-terminally processed;Thymosin alpha-1	PTMA	66.911	8141300000	34	29.5361	29.6893	29.6304	30.0868	22.6337	29.474
	1.03746	-0.408987	C9IYN3;D6W592;Q8WVV9-4;Q8WVV9;B7WPG3;Q8WVV9-5;Q8WVV9-3;Q8WVV9-2;H7BXH8;H7C464;C9JJZ7	C9IYN3;D6W592;Q8WVV9-4;Q8WVV9;B7WPG3;Q8WVV9-5;Q8WVV9-3;Q8WVV9-2	Heterogeneous nuclear ribonucleoprotein L-like	HNRNPLL;HNRPLL	65.188	581230000	84	26.1546	25.9985	26.0465	26.0109	25.4279	25.5337
	0.297737	0.30433	C9J0A7;Q9UQN3;A0A087WW88;Q9UQN3-2	C9J0A7;Q9UQN3;A0A087WW88;Q9UQN3-2	Charged multivesicular body protein 2b	CHMP2B	4.2956	85539000	13	23.5393	23.7101	23.5121	24.3446	24.2571	23.0728
	1.24322	0.711237	C9J0K6;P30626-2;P30626;P30626-3;B4DHQ6;E9PG82	C9J0K6;P30626-2;P30626;P30626-3;B4DHQ6	Sorcin	SRI	41.037	4040800000	121	27.7764	28.3357	28.3093	29.0027	28.4603	29.0921
	0.508421	0.852926	C9J5D1;Q9GZZ1;A0A087WWJ2;E7EQ69;Q9GZZ1-2;F8WCK0;C9JZU6;A0A0D9SF32;B0AZT5;C9J5J3	C9J5D1;Q9GZZ1;A0A087WWJ2;E7EQ69;Q9GZZ1-2	N-alpha-acetyltransferase 50	NAA50	8.5254	264470000	28	23.3526	22.6422	24.762	24.9758	24.6578	23.6819
	0.19209	0.0697753	C9JBI3;P78330	C9JBI3;P78330	Phosphoserine phosphatase	PSPH	17.043	602980000	40	25.6158	25.7809	25.9648	26.0108	25.8795	25.6804
	0.315082	0.126252	C9JCC6;Q14919;Q14919-2;E9PNC7;E9PQX9;E9PMW2	C9JCC6;Q14919;Q14919-2;E9PNC7;E9PQX9	Dr1-associated corepressor	DRAP1	41.031	617370000	32	26.1409	25.671	25.6389	25.9398	25.9849	25.9048
	0.37589	0.342319	C9JE82;C9JVC9;Q9NY47-4;Q9NY47-2;Q9NY47-3;Q9NY47;Q9NY47-5	C9JE82;C9JVC9;Q9NY47-4;Q9NY47-2;Q9NY47-3;Q9NY47;Q9NY47-5	Voltage-dependent calcium channel subunit alpha-2/delta-2;Voltage-dependent calcium channel subunit alpha-2-2;Voltage-dependent calcium channel subunit delta-2	CACNA2D2	21.244	191370000	33	23.523	24.6975	24.3715	24.6852	24.234	24.6998
	0.323976	0.0534814	C9JFE4;Q13098-5;Q13098-7;Q13098;A0A096LP07;A8K070;A0A096LPJ3;Q13098-6;J3KSA5;J3KRJ4;J3QS88;J3KTB0;J3QLT0;J3QS84;J3QLE8;J3QL53;J3KRE8;J3QQX0	C9JFE4;Q13098-5;Q13098-7;Q13098;A0A096LP07;A8K070;A0A096LPJ3;Q13098-6;J3KSA5	COP9 signalosome complex subunit 1	GPS1	57.053	1361700000	118	27.0205	27.1248	27.0798	27.0201	27.1355	27.2299
	2.6401	0.910683	C9JFR7;P99999;CON__P62894	C9JFR7;P99999	Cytochrome c	CYCS	68.473	1431800000	60	26.4134	26.6424	26.3495	27.2498	27.3184	27.5691
	0.140529	-0.0409934	C9JIF9;P13798;H7C393;H7C1U0;C9JLK2;F8WEH5;H0YFE5	C9JIF9;P13798	Acylamino-acid-releasing enzyme	APEH	116.51	3386100000	188	28.5017	28.3229	28.4038	28.4581	28.4684	28.1789
	0.489992	0.273034	C9JLU1;P52434;P52434-3;P52434-2;P52434-4;P52434-5	C9JLU1;P52434;P52434-3;P52434-2;P52434-4	DNA-directed RNA polymerases I, II, and III subunit RPABC3	POLR2H	18.095	666230000	38	26.1223	26.0469	25.5449	26.367	25.8564	26.3098
	0.766566	-0.381469	C9JXB8;C9JNW5;P83731	C9JXB8;C9JNW5;P83731	60S ribosomal protein L24	RPL24	12.388	4569100000	51	29.018	28.8624	29.0298	28.8832	28.7305	28.1522
	0.853471	1.03164	C9JR52;P21246	C9JR52;P21246	Pleiotrophin	PTN	6.7953	103560000	18	21.7095	23.1429	23.2984	23.7012	23.351	24.1935
	0.894607	1.33062	C9JRZ6;Q9NX63;F8WAR4;A0A286YEX5	C9JRZ6;Q9NX63;F8WAR4;A0A286YEX5	MICOS complex subunit MIC19	CHCHD3	42.626	534260000	37	23.332	25.3141	25.4974	26.066	26.0621	26.0072
	0.283483	0.166937	C9JTE9;H7C5E2;Q9UHQ4;Q9UHQ4-2;C9JGJ9;B7Z2L0;H0Y7N8;F8WB99;C9IYK6	C9JTE9;H7C5E2;Q9UHQ4;Q9UHQ4-2;C9JGJ9;B7Z2L0;H0Y7N8;F8WB99;C9IYK6	B-cell receptor-associated protein 29	BCAP29	4.0831	96469000	19	23.3576	23.8295	23.357	23.6968	23.3667	23.9815
	0.260125	-0.113403	C9JVE2;Q96GG9;C9JRU6;C9J0B2;C9JUW4;C9J8R4	C9JVE2;Q96GG9;C9JRU6;C9J0B2;C9JUW4;C9J8R4	DCN1-like protein;DCN1-like protein 1	DCUN1D1	8.5194	256560000	33	24.7148	24.8247	24.5251	24.276	24.7473	24.7011
	0.960354	-1.00114	C9JW74;Q5EB52-2;Q5EB52;Q5EB52-3;C9JWU9;C9JSW2;R4GN52;C9JRA9;C9JCM6;C9JUD2	C9JW74;Q5EB52-2;Q5EB52;Q5EB52-3;C9JWU9;C9JSW2;R4GN52	Mesoderm-specific transcript homolog protein	MEST	166.29	705230000	52	27.5142	26.0657	26.417	25.3259	26.0744	25.5933
	1.09656	-0.540789	C9JY26;Q9BZG1-4;Q9BZG1;Q9BZG1-2;J3QLC6;C9JBG0;Q96PJ7;E7ES60;K7EIF2;H7C0Y7	C9JY26;Q9BZG1-4;Q9BZG1;Q9BZG1-2;J3QLC6;C9JBG0;Q96PJ7;E7ES60	Ras-related protein Rab-34	RAB34	15.635	164650000	22	24.7539	24.4997	24.6822	24.1273	24.4722	23.714
	0.781994	-0.630147	C9JYN0;Q16563-2;Q16563;A0A0U1RQT9;H7C4J8	C9JYN0;Q16563-2;Q16563	Synaptophysin-like protein 1	SYPL1	7.3453	160390000	22	23.4346	23.6044	24.3744	23.2021	22.7569	23.5641
	1.32612	-0.700771	C9JZG9;C9JZY6;P62256;H7C4M9;P62256-2;C9J8Q9	C9JZG9;C9JZY6;P62256;H7C4M9;P62256-2	Ubiquitin-conjugating enzyme E2 H	UBE2H	7.8873	132930000	22	24.4749	24.2517	23.8668	23.1581	23.7191	23.6139
	0.29835	0.153049	C9JZR2;O60716-5;O60716-3;O60716-2;O60716;O60716-21;O60716-19;O60716-18;O60716-17;O60716-13;O60716-11;O60716-10;O60716-9;O60716-8;O60716-7;O60716-6;O60716-4;O60716-24;O60716-23;O60716-22;O60716-20;O60716-16;O60716-15;O60716-14;O60716-12;O60716-29;O60716-27;O60716-26;O60716-25;O60716-32;O60716-31;O60716-30;O60716-28;E9PKY0;E9PRE2;H0YC95	C9JZR2;O60716-5;O60716-3;O60716-2;O60716;O60716-21;O60716-19;O60716-18;O60716-17;O60716-13;O60716-11;O60716-10;O60716-9;O60716-8;O60716-7;O60716-6;O60716-4;O60716-24;O60716-23;O60716-22;O60716-20;O60716-16;O60716-15;O60716-14;O60716-12;O60716-29;O60716-27;O60716-26;O60716-25;O60716-32;O60716-31;O60716-30;O60716-28	Catenin delta-1	CTNND1	220.46	2885400000	258	28.295	27.8608	28.0352	28.3405	27.8887	28.4209
	0.231613	0.167937	D3DQ64;P27144	D3DQ64;P27144	Adenylate kinase 4, mitochondrial	AK4	13.956	391910000	31	24.6316	25.2371	25.3706	25.4926	25.3318	24.9187
	0.860453	0.424473	D3DTX6;Q96SB3	D3DTX6;Q96SB3	Neurabin-2	PPP1R9B	21.301	169340000	31	23.5781	23.8447	23.7667	24.5683	23.8449	24.0497
	1.74649	0.413486	F6U1T9;D3YTA9;H7BYZ3;P63098;A0A1B0GUC7;Q96LZ3	F6U1T9;D3YTA9;H7BYZ3;P63098	Calcineurin subunit B type 1	PPP3R1	75.181	1227900000	49	26.8903	26.5935	26.7044	27.0182	27.2093	27.2012
	0.0233623	-0.0188128	D3YTB1;F8W727;P62910;D3YTI8	D3YTB1;F8W727;P62910	60S ribosomal protein L32	RPL32	31.086	3360500000	77	28.1842	28.3567	28.499	28.7107	27.8491	28.4237
	1.60102	0.47988	D6R938;E9PBG7;E9PF82;Q13557-8;Q13557-10;Q13557;Q13557-6;Q13557-11;Q13557-12;Q13557-9;Q13557-5;Q13557-3;Q13557-4;H0Y9J2;H0Y9C2	D6R938;E9PBG7;E9PF82;Q13557-8;Q13557-10;Q13557;Q13557-6;Q13557-11;Q13557-12;Q13557-9;Q13557-5;Q13557-3;Q13557-4	Calcium/calmodulin-dependent protein kinase type II subunit delta	CAMK2D	75.42	1664000000	109	27.2312	27.1609	27.0863	27.5564	27.4658	27.8958
	0.48889	0.277639	D6R9P3;D6RD18;D6RBZ0;Q99729-3;Q99729-2;Q99729-4;Q99729	D6R9P3;D6RD18;D6RBZ0;Q99729-3;Q99729-2;Q99729-4;Q99729	Heterogeneous nuclear ribonucleoprotein A/B	HNRNPAB	27.367	3624900000	74	27.9066	28.6497	28.3927	28.7745	28.3748	28.6326
	0.209786	0.389377	D6RDV0;D6RA37;D6RIY7;Q13454-2;Q13454;A0A0A0MTC2	D6RDV0;D6RA37;D6RIY7;Q13454-2;Q13454;A0A0A0MTC2	Tumor suppressor candidate 3	TUSC3	12.293	174720000	19	23.2826	23.0272	23.4019	24.8991	22.4427	23.538
	0.566956	-0.378123	D6RAA6;P57088;H0Y8N0	D6RAA6;P57088;H0Y8N0	Transmembrane protein 33	TMEM33	28.468	380410000	24	25.3935	25.0571	26.0031	25.0018	25.3178	24.9998
	0.355051	0.413205	D6RB01;Q9Y6X4;D6RC41;D6R953;Q9Y6X4-2	D6RB01;Q9Y6X4	Soluble lamin-associated protein of 75 kDa	FAM169A	20.474	93225000	25	23.8548	22.7643	23.2664	23.7278	23.0622	24.3351
	0.615492	-1.01091	D6RBJ9;P32321;P32321-2;D6R9S0;D6RBN2;D6RC36;D6RAD7;D6RAR9	D6RBJ9;P32321;P32321-2;D6R9S0;D6RBN2	Deoxycytidylate deaminase	DCTD	17.77	363330000	29	25.7503	25.5957	25.5887	25.2307	25.5004	23.1709
	0.611561	0.192753	D6RGI3;D6RER5;Q9NVA2;Q9NVA2-2;D6RDU5;H0Y961;D6RDP1;D6R9Y6;H0Y9G8	D6RGI3;D6RER5;Q9NVA2;Q9NVA2-2;D6RDU5	Septin-11	2011-09-01	323.31	10529000000	345	29.8836	29.9104	29.9414	30.2527	29.8238	30.2372
	0.354052	0.116052	D6REX3;O94979-3;O94979-9;O94979-2;O94979;O94979-8;O94979-6;O94979-10;O94979-4;D6RHZ5;H7BXG7;O94979-7;O94979-5;H0YAB3;H0Y8V7;H0Y9T9;H0Y9K1;H0Y8W8;D6RE64;D6RCQ9;H0YAF5;H0Y9V3;D6RBT0;D6RHE8	D6REX3;O94979-3;O94979-9;O94979-2;O94979;O94979-8;O94979-6;O94979-10;O94979-4;D6RHZ5;H7BXG7;O94979-7;O94979-5	Protein transport protein Sec31A	SEC31A	218.81	4268200000	288	28.8715	28.5171	28.5877	28.8474	28.6097	28.8673
	0.667971	0.968332	D6RFG8;P27707;D6RCP9;D6RG38	D6RFG8;P27707;D6RCP9	Deoxycytidine kinase	DCK	17.348	219150000	30	24.2022	22.4528	24.4956	25.0054	24.5288	24.5214
	1.55454	-0.640606	E5RFU2;P34913;P34913-2;P34913-3;E5RFH6;H0YAW7;E5RI53	E5RFU2;P34913;P34913-2;P34913-3;E5RFH6	Bifunctional epoxide hydrolase 2;Cytosolic epoxide hydrolase 2;Lipid-phosphate phosphatase	EPHX2	70.616	564400000	75	26.4133	26.0333	26.2304	25.6767	25.7954	25.2831
	0.944468	-0.273385	E5RGN3;E5RIM7;O00244	E5RGN3;E5RIM7;O00244	Copper transport protein ATOX1	ATOX1	18.553	697370000	39	26.2741	26.1748	25.9232	25.6859	25.977	25.889
	0.821023	0.385062	E5RHG8;Q15369;Q15369-2;R4GMY8	E5RHG8;Q15369;Q15369-2;R4GMY8	Transcription elongation factor B polypeptide 1	TCEB1	74.519	2948800000	111	27.909	27.8346	28.0909	28.456	27.9318	28.6019
	0.722857	-0.200661	E5RHW4;O94905;E5RJ09;O94905-2;O94905-3	E5RHW4;O94905	Erlin-2	ERLIN2	98.476	3526800000	136	28.6267	28.314	28.7026	28.2627	28.3643	28.4143
	0.488989	0.151278	E5RI99;P62888;A0A0B4J213;E5RJH3;A0A0C4DH44	E5RI99;P62888	60S ribosomal protein L30	RPL30	66.088	2559800000	77	27.7674	27.9419	28.002	28.205	27.8292	28.1309
	0.936169	0.598473	E5RIW3;E5RJD8;O75347;E5RHG6;O75347-2;E5RIX8	E5RIW3;E5RJD8;O75347;E5RHG6;O75347-2	Tubulin-specific chaperone A	TBCA	37.8	5118200000	79	28.3892	28.6339	28.7817	29.4104	28.6526	29.5371
	0.535404	-0.460948	E5RIZ4;Q9P015	E5RIZ4;Q9P015	39S ribosomal protein L15, mitochondrial	MRPL15	7.4335	77760000	19	23.1187	23.5914	23.2485	22.3472	23.5346	22.6939
	0.657132	-0.354622	E7EM64;Q7L5N1;H7C3T0	E7EM64;Q7L5N1	COP9 signalosome complex subunit 6	COPS6	43.291	930250000	57	26.6165	26.7439	26.6479	26.7682	26.231	25.9452
	1.18471	0.494623	J3QLD9;E7EMK3;Q14254;K7EKW9	J3QLD9;E7EMK3;Q14254	Flotillin-2	FLOT2	35.028	1019300000	85	25.9232	26.5467	26.4604	26.7713	26.8463	26.7967
	1.14159	0.56691	E7EMN6;P41236;E7EUI7;Q6NXS1	E7EMN6;P41236;E7EUI7;Q6NXS1	Protein phosphatase inhibitor 2;Protein phosphatase inhibitor 2-like protein 3	PPP1R2;PPP1R2P3	23.203	629090000	50	25.5634	25.8442	25.6032	26.0937	25.9552	26.6626
	0.126365	0.0509421	J3KMY5;G3V3E8;E7EMS2;G3V3D1;P61916;H0YIZ1;G3V2V8;P61916-2	J3KMY5;G3V3E8;E7EMS2;G3V3D1;P61916;H0YIZ1;G3V2V8;P61916-2	Epididymal secretory protein E1	NPC2	43.198	1208600000	46	27.0879	26.7532	26.8821	26.8324	26.8637	27.1799
	0.238953	0.167506	E7EPB3;P50914	E7EPB3;P50914	60S ribosomal protein L14	RPL14	13.461	4047800000	55	28.3659	28.4779	28.7881	28.778	28.2568	29.0996
	0.264009	0.128049	E7EPN9;Q9Y520-3;Q9Y520-4;Q9Y520-5;Q9Y520;Q9Y520-7;Q9Y520-6;Q9Y520-2;A0A2R8Y7F4;A0A2R8YET2;H7C5N8;A0A0A0MS30;A0A2R8Y424	E7EPN9;Q9Y520-3;Q9Y520-4;Q9Y520-5;Q9Y520;Q9Y520-7;Q9Y520-6;Q9Y520-2	Protein PRRC2C	PRRC2C	51.648	410350000	71	25.1537	25.1101	25.1493	25.5598	24.9019	25.3355
	1.6998	-1.29062	E7EPT4;P19404	E7EPT4;P19404	NADH dehydrogenase [ubiquinone] flavoprotein 2, mitochondrial	NDUFV2	6.298	310130000	16	25.7004	25.3157	25.4422	24.8369	23.7826	23.9669
	1.08976	0.719517	E7EPV7;P37840-2;P37840;D6RA31;H6UYS7;P37840-3	E7EPV7;P37840-2;P37840;D6RA31;H6UYS7;P37840-3	Alpha-synuclein	SNCA	57.719	719930000	36	25.9161	25.1733	25.6861	26.0111	26.7388	26.1841
	0.899849	1.81426	E7EQM8;P43146;J3QS93;H0Y2Q5;J3QQJ6;J3QRM6;J3QLT8	E7EQM8;P43146;J3QS93;H0Y2Q5	Netrin receptor DCC	DCC	68.904	452230000	66	22.6744	25.8366	23.8262	26.2418	25.9015	25.6368
	1.25887	0.377836	E7EQR4;P15311;E9PNP4	E7EQR4;P15311	Ezrin	EZR	280.43	16042000000	358	30.4764	30.3093	30.3303	30.8008	30.5024	30.9464
	0.576631	0.385731	E9PES6;E7ES08;E7EQU1;O15347	E9PES6;E7ES08;E7EQU1;O15347	High mobility group protein B3	HMGB3	44.503	3805300000	96	27.917	28.5887	28.5439	29.1417	28.4933	28.5717
	0.859297	0.421431	E7ERI8;E7EW49;O75122-3;E3W994;J3KR49;A0A0U1RQI6;O75122;B3KR06;E7ENG2;O75122-2;H7C4I5;C9J668;H7C5M8;D6RBU8;H7C4X8;H7C4M5	E7ERI8;E7EW49;O75122-3;E3W994;J3KR49;A0A0U1RQI6;O75122	CLIP-associating protein 2	CLASP2	193.05	1664500000	199	26.6346	27.3977	26.9886	27.4325	27.3257	27.527
	1.1229	0.58809	E7ESP9;P07197;E7EMV2;P07197-2	E7ESP9;P07197;E7EMV2	Neurofilament medium polypeptide	NEFM	226.61	2636400000	216	27.6759	27.4977	28.032	28.6187	27.9693	28.3818
	1.39065	-0.196975	E7ESY4;Q13330-3;Q13330;H0Y4T7;Q13330-2;F8W9Y9;H7C3F3	E7ESY4;Q13330-3;Q13330;H0Y4T7;Q13330-2	Metastasis-associated protein MTA1	MTA1	50.043	881720000	85	26.5393	26.6693	26.6082	26.3333	26.5142	26.3784
	0.112001	0.0602779	E7ETZ4;Q9Y6E2;B5MCH7;B5MCE7;E9PFD4;Q75MG1;E7EMS9;E9PFE3;C9JF98;F8WDX8;Q9Y6E2-2	E7ETZ4;Q9Y6E2;B5MCH7;B5MCE7;E9PFD4;Q75MG1	Basic leucine zipper and W2 domain-containing protein 2	BZW2	42.727	705320000	64	25.9593	25.9861	26.2058	26.4608	25.9977	25.8735
	1.19491	-0.580774	E7EU96;A0A2R8YD58;P68400;A0A2R8YF43;A0A2R8Y5A0;Q8NEV1;A0A2R8YDP2;A0A2R8YFU2;A0A2R8Y4D6;A0A2R8Y4H0;V9GYA2;P68400-2;A0A2R8YEW1;A0A2R8YCK2;A0A2R8YDY7;A0A087WY74;A0A2R8Y3W6;A0A2R8Y797;A0A2R8YEL7;V9GY80;A0A2R8YF47;A0A2R8Y7T1;A0A2R8YCC9;V9GYW6	E7EU96;A0A2R8YD58;P68400;A0A2R8YF43;A0A2R8Y5A0;Q8NEV1;A0A2R8YDP2;A0A2R8YFU2;A0A2R8Y4D6;A0A2R8Y4H0	Casein kinase II subunit alpha;Casein kinase II subunit alpha 3	CSNK2A1;CSNK2A3	110.74	1973500000	146	28.124	27.8025	27.7217	27.2079	27.6725	27.0255
	1.10138	0.262142	E7EX73;E9PGM1;E7EUU4;Q04637-5;Q04637-4;Q04637-3;Q04637;Q04637-8;Q04637-9;Q04637-6;Q04637-7;C9JF13;C9J6B6;C9K073;C9J2Z7;H7C044;H7C0V6;F8WCF2;C9JHW9	E7EX73;E9PGM1;E7EUU4;Q04637-5;Q04637-4;Q04637-3;Q04637;Q04637-8;Q04637-9;Q04637-6;Q04637-7	Eukaryotic translation initiation factor 4 gamma 1	EIF4G1	173.22	2938000000	248	28.0382	27.9506	28.0392	28.3732	28.0556	28.3856
	0.73729	0.197192	E7EVA0;P27816;P27816-6;P27816-2;P27816-5;P27816-4;H7C4C5;B5MEG9;H7C456;A0A0J9YVV8;A0A0J9YW37;P27816-7	E7EVA0;P27816;P27816-6;P27816-2;P27816-5	Microtubule-associated protein;Microtubule-associated protein 4	MAP4	190.94	7844000000	348	29.6755	29.3764	29.5002	29.8411	29.5487	29.7538
	1.35333	0.410229	E7EVJ5;Q96F07-2;Q96F07;H7C229;E7EW33;A0A087WWZ1;A0A087WTQ3;A0A087WVE1;H0YL50;A0A087WZL7	E7EVJ5;Q96F07-2;Q96F07;H7C229;E7EW33	Cytoplasmic FMR1-interacting protein 2	CYFIP2	139.31	2494100000	227	27.6046	27.7858	27.5023	28.1326	27.8128	28.178
	0.318504	0.38887	E7EVQ6;Q14534;H0YBN7;E5RJH9	E7EVQ6;Q14534	Squalene monooxygenase	SQLE	20.35	158590000	32	23.8849	23.7812	22.6346	23.2595	24.2808	23.9271
	0.482354	-0.135879	E7EVX8;Q8WWY3;Q8WWY3-4;E7EU94;E7ESX0;E7EN72;Q8WWY3-3;Q8WWY3-2	E7EVX8;Q8WWY3;Q8WWY3-4;E7EU94;E7ESX0;E7EN72;Q8WWY3-3;Q8WWY3-2	U4/U6 small nuclear ribonucleoprotein Prp31	PRPF31	39.956	1029000000	80	26.6828	26.9122	26.6698	26.659	26.7579	26.4404
	0.649027	-0.142969	E7EWR4;P33240-2;P33240;E9PID8;A0A0A0MT56	E7EWR4;P33240-2;P33240;E9PID8;A0A0A0MT56	Cleavage stimulation factor subunit 2	CSTF2	66.506	959250000	82	26.5898	26.7626	26.7288	26.3859	26.6642	26.6022
	0.772029	0.3696	E7EX17;P23588;P23588-2;F8VX11;F8VYE9;F8VSC7;F8VP89;F8W0K0;F8VRU1	E7EX17;P23588;P23588-2;F8VX11	Eukaryotic translation initiation factor 4B	EIF4B	107.18	2523900000	131	27.7856	27.6124	27.7346	28.1767	27.6704	28.3943
	0.404343	-0.190477	E9PAV3;F8VZJ2;H0YHX9;Q13765;E9PAV3-2;F8W0W4;F8W1N5;F8VNW4;F8VZ58;Q9BZK3	E9PAV3;F8VZJ2;H0YHX9;Q13765;E9PAV3-2;F8W0W4;F8W1N5;F8VNW4	Nascent polypeptide-associated complex subunit alpha, muscle-specific form;Nascent polypeptide-associated complex subunit alpha	NACA	179.91	4664100000	91	28.7279	28.9129	28.8735	28.9199	28.745	28.278
	1.37463	-1.15405	E9PBP6;P55157;D6REL9;P55157-2	E9PBP6;P55157	Microsomal triglyceride transfer protein large subunit	MTTP	115.99	688120000	97	27.3339	26.3654	26.6358	25.2691	26.1432	25.4606
	0.625861	-1.69704	E9PC52;Q16576;Q16576-2;Q5JP01;Q5JP02;C9J7L0;Q5JNZ6	E9PC52;Q16576;Q16576-2	Histone-binding protein RBBP7	RBBP7	66.17	768830000	36	26.4213	26.7073	26.4797	22.4139	25.8698	26.2334
	0.946492	-1.59436	E9PD53;Q9NTJ3;Q9NTJ3-2;C9JR83;C9J9E4;C9JVD8;C9J578;C9JWF0;C9IYK2;C9JJ64	E9PD53;Q9NTJ3;Q9NTJ3-2	Structural maintenance of chromosomes protein;Structural maintenance of chromosomes protein 4	SMC4	60.075	175130000	50	24.4	26.0419	24.082	23.0722	24.1911	22.4775
	1.70934	-0.635859	E9PDF6;O43795-2;O43795;E7EQD9;H7C2Y7;Q9UBC5;C9JYW1;A0A0U1RRI3;C9JUP5;G3V342	E9PDF6;O43795-2;O43795	Unconventional myosin-Ib	MYO1B	79.526	602840000	98	26.3062	26.3126	26.1213	25.7644	25.2981	25.77
	1.76214	0.548766	E9PDR0;P05166;E7EUY3;C9JQS9;E7EX59;P05166-2;E7ETT1;E7ETT4;E9PEC3;F8WBI9;E7ENC1;H7C5C9;C9JVW9;C9JVY9;C9JAW3	E9PDR0;P05166;E7EUY3;C9JQS9;E7EX59;P05166-2;E7ETT1;E7ETT4;E9PEC3;F8WBI9	Propionyl-CoA carboxylase beta chain, mitochondrial	PCCB	128.76	1427600000	110	26.5841	26.9833	26.8536	27.4333	27.2034	27.4306
	1.19945	-0.953498	E9PE82;P16219	E9PE82;P16219	Short-chain specific acyl-CoA dehydrogenase, mitochondrial	ACADS	10.465	123400000	19	24.7628	24.652	24.5893	24.3556	23.0733	23.7148
	1.41682	-0.460381	E9PF10;O75694-2;O75694	E9PF10;O75694-2;O75694	Nuclear pore complex protein Nup155	NUP155	62.853	853330000	113	26.4897	26.7811	26.6442	26.0587	26.4293	26.0458
	0.488384	-0.392692	E9PF16;Q96CM8-3;Q96CM8;Q96CM8-2;Q96CM8-4;D6RF87	E9PF16;Q96CM8-3;Q96CM8;Q96CM8-2;Q96CM8-4	Acyl-CoA synthetase family member 2, mitochondrial	ACSF2	27.453	329170000	38	25.7417	25.1097	25.1524	24.3892	25.1007	25.3359
	0.0317166	-0.0299161	E9PF19;Q9Y4P3;Q96E41;A0A087WXC6	E9PF19;Q9Y4P3;Q96E41	Transducin beta-like protein 2	TBL2	42.52	660810000	65	26.3634	25.6773	26.1692	26.3373	26.2262	25.5567
	0.335327	-0.689922	E9PFN5;Q9Y2Q3;Q9Y2Q3-3;Q9Y2Q3-2;C9JNT3;Q9Y2Q3-4	E9PFN5;Q9Y2Q3;Q9Y2Q3-3;Q9Y2Q3-2;C9JNT3;Q9Y2Q3-4	Glutathione S-transferase kappa 1	GSTK1	43.538	327060000	28	25.2605	24.9787	25.0346	24.8507	25.5869	22.7664
	0.983954	-0.401013	E9PGC0;P20936-2;P20936-4;P20936;P20936-3	E9PGC0;P20936-2;P20936-4;P20936	Ras GTPase-activating protein 1	RASA1	27.106	224120000	43	24.6431	24.7092	24.6957	24.217	24.6382	23.9897
	0.751159	0.355435	E9PGC8;P78559;P78559-2	E9PGC8;P78559;P78559-2	Microtubule-associated protein 1A;MAP1A heavy chain;MAP1 light chain LC2	MAP1A	144.33	1004400000	185	25.9983	26.5523	26.6148	26.7131	26.5985	26.9201
	1.16051	-0.718685	E9PH64;Q9Y6M9;A0A3B3IT57;E7EWZ0;E9PF49	E9PH64;Q9Y6M9	NADH dehydrogenase [ubiquinone] 1 beta subcomplex subunit 9	NDUFB9	13.614	336810000	36	25.6575	25.4255	25.0565	24.6433	25.0729	24.2671
	0.56593	-0.385914	E9PHY0;P11117;E9PP23;E9PQY3;E9PKW9;E9PQW9;B7Z6U3;B7Z7D2;P11117-2	E9PHY0;P11117;E9PP23;E9PQY3;E9PKW9;E9PQW9;B7Z6U3;B7Z7D2;P11117-2	Lysosomal acid phosphatase	ACP2	45.868	479500000	50	25.8361	25.8083	25.6152	25.2428	25.9287	24.9303
	0.70524	-0.591621	Q5T6K7;E9PI99;Q5T6K5;Q13952-6;Q13952-7;Q13952-2;Q13952-5;Q13952-3;Q13952;A0A0A0MT00;Q13952-4;E9PJA8;E9PQR2;E9PL11	Q5T6K7;E9PI99;Q5T6K5;Q13952-6;Q13952-7;Q13952-2;Q13952-5;Q13952-3;Q13952;A0A0A0MT00;Q13952-4	Nuclear transcription factor Y subunit gamma	NFYC	10.123	198920000	21	24.6816	24.9446	24.258	23.6717	24.6877	23.7499
	0.526929	1.46261	E9PKN9;E9PS55;E9PMW4;E9PQ46;E9PIN5;E9PIK4;U3KQ32;E9PKZ4;E9PPM1;O14683;E9PN66;E9PNB3;E9PMY0	E9PKN9;E9PS55;E9PMW4;E9PQ46;E9PIN5;E9PIK4;U3KQ32;E9PKZ4;E9PPM1;O14683;E9PN66;E9PNB3;E9PMY0	Tumor protein p53-inducible protein 11	TP53I11	8.3462	334460000	15	23.3747	23.078	23.6897	25.9869	22.4275	26.1158
	2.11865	1.06333	E9PJH7;Q9H936;A0A0D9SFE1;K4DIA8;A0A0D9SEI9;K4DIB8;K4DIB6;K4DIB3;E9PS95;A0A0D9SFA8;K4DIB0;K4DIA2;A0A0D9SG84;E9PI74;E9PQ36;E9PJY0;A0A0A6YYN8;K4DIB4;Q9H1K4	E9PJH7;Q9H936;A0A0D9SFE1;K4DIA8;A0A0D9SEI9;K4DIB8	Mitochondrial glutamate carrier 1	SLC25A22	77.764	960360000	71	25.6654	25.6079	25.9355	27.1642	26.536	26.6986
	1.34502	1.95835	E9PJP2;Q5TF21;H3BRB8;J3QL92;Q9Y4B5-2;Q9Y4B5-3;Q9Y4B5	E9PJP2;Q5TF21	Protein SOGA3	SOGA3	66.264	336370000	53	22.7233	24.2651	23.3415	25.1769	24.6476	26.3805
	0.381109	-0.271718	H7BXH2;E9PKF6;Q5H9R7-6;Q5H9R7-2;Q5H9R7;Q5H9R7-5;Q5H9R7-4;Q5H9R7-3;E9PQP7;H0YEN2;E9PNN8;E9PK08;E9PJD8;E9PKG4;H0YDW1;H0YDK9	H7BXH2;E9PKF6;Q5H9R7-6;Q5H9R7-2;Q5H9R7;Q5H9R7-5;Q5H9R7-4;Q5H9R7-3;E9PQP7	Serine/threonine-protein phosphatase 6 regulatory subunit 3	PPP6R3	165.78	518440000	70	25.4006	25.4732	25.7532	25.4368	25.6501	24.7249
	0.0297158	-0.00791613	E9PLK3;P55786;P55786-2;A6NEC2;H0YDG0;E9PP11;A6NEC2-2;H0YCQ5;E9PJ74;E9PJY4;E9PPD4;E9PRQ5;A6NEC2-3;E9PI82;E9PJF9;E9PPZ2	E9PLK3;P55786;P55786-2	Puromycin-sensitive aminopeptidase	NPEPPS	309.24	13132000000	393	30.4127	30.1834	30.1454	30.1971	30.3035	30.2172
	0.354047	-0.662526	E9PPJ5;E9PLM6;P21741;P21741-2	E9PPJ5;E9PLM6;P21741;P21741-2	Midkine	MDK	16.062	182340000	35	24.6554	23.6877	24.8017	24.8569	23.8426	22.4578
	0.0509605	-0.0365423	E9PM92;O00193;E9PRZ9;E9PQA1	E9PM92;O00193;E9PRZ9	Small acidic protein	C11orf58;SMAP	186.11	1103800000	85	26.7303	27.046	26.5559	26.8927	26.3438	26.9861
	0.877357	-0.699249	E9PMI6;J3KN38;P54105;E9PJF4;E9PQ83	E9PMI6;J3KN38;P54105;E9PJF4	Methylosome subunit pICln	CLNS1A	51.261	834700000	44	26.5411	26.7503	26.6007	26.2863	26.3082	25.1999
	0.183388	-0.25082	E9PP21;P21291;E9PS42;E9PND2	E9PP21;P21291;E9PS42;E9PND2	Cysteine and glycine-rich protein 1	CSRP1	20.18	279060000	36	25.6428	24.242	24.6358	24.996	23.9745	24.7977
	0.147802	-0.105029	E9PQP6;P49354;P49354-2;B3KVN2;H0YCW1;E9PPM9;E9PN85	E9PQP6;P49354;P49354-2;B3KVN2;H0YCW1	Protein farnesyltransferase/geranylgeranyltransferase type-1 subunit alpha	FNTA	54.994	392860000	38	25.6725	24.949	25.3465	24.9103	25.2838	25.4589
	0.328021	-0.275528	E9PR30;P62861	E9PR30;P62861	40S ribosomal protein S30	FAU	6.9433	1394100000	28	26.8747	27.2397	27.2865	27.3118	27.0223	26.2402
	0.66889	-0.192133	E9PS17;Q96KG9-3;Q96KG9-2;Q96KG9;E9PK59;Q96KG9-5;Q96KG9-4;Q96KG9-6;E9PPN3;A0A0A0MQX4;H0YCI6;H0YDH0	E9PS17;Q96KG9-3;Q96KG9-2;Q96KG9;E9PK59;Q96KG9-5;Q96KG9-4;Q96KG9-6;E9PPN3	N-terminal kinase-like protein	SCYL1	44.666	483470000	70	25.8278	25.5161	25.6291	25.3777	25.6518	25.3672
	1.43228	1.49647	F1T0E5;Q9ULU8-2;Q9ULU8-3;Q9ULU8;Q9ULU8-4;Q9ULU8-5;H0YFP0;H7C4T6;H7C4P2;H7C4K9;A0A0C4DGY2;H7C538;H7BYR4;F8W8P5;C9IYE1;A0A087X1P3;Q86UW7-3;Q86UW7-2;Q86UW7	F1T0E5;Q9ULU8-2;Q9ULU8-3;Q9ULU8;Q9ULU8-4	Calcium-dependent secretion activator 1	CADPS	39.286	148630000	28	23.8857	22.4377	22.6839	24.119	24.6859	24.6918
	0.775289	1.2412	F1T0I1;O15027-2;O15027-4;O15027-3;O15027;O15027-5;X6RGP5;A0A0C4DH09;Q8N9G1	F1T0I1;O15027-2;O15027-4;O15027-3;O15027;O15027-5;X6RGP5;A0A0C4DH09	Protein transport protein Sec16A	SEC16A	71.515	415250000	88	22.9947	24.5941	25.5163	25.6835	25.5452	25.5999
	1.60342	0.404649	F2Z2V0;Q99829;B0QZ18;A6PVH9;E7ENH5;Q5JX56;Q5JX58;Q5JX59;Q5JX60;Q5JX44;Q5JX45;Q5JX55;Q5JX61;Q5JX52;Q5JX54;Q5JX57;E7EV27;Q5JX53;H0Y524	F2Z2V0;Q99829;B0QZ18;A6PVH9;E7ENH5;Q5JX56;Q5JX58;Q5JX59;Q5JX60;Q5JX44;Q5JX45;Q5JX55;Q5JX61;Q5JX52	Copine-1	CPNE1	279.18	1627600000	103	27.006	27.3157	27.0701	27.6514	27.5346	27.4198
	1.05193	0.379698	F5GWE5;Q00169;I3L4H1;I3L459;I3L4C0;I3L2X8;I3L471;I3L4U7;I3NI10;I3L3W1	F5GWE5;Q00169;I3L4H1;I3L459	Phosphatidylinositol transfer protein alpha isoform	PITPNA	176.22	1361300000	99	26.5637	26.8293	27.0082	27.3092	26.9613	27.2697
	0.0606273	-0.116816	F5GWT4;Q9H4A3-2;Q9H4A3;Q9H4A3-5;Q9H4A3-6;Q9H4A3-7;Q9H4A3-4;Q9Y3S1-3;A6PVV2;K7ENT7;A0A087WYK2;Q96J92-3;Q96J92;Q9BYP7-3;Q9BYP7-4;Q9BYP7-2;Q9BYP7;Q96J92-2	F5GWT4;Q9H4A3-2;Q9H4A3;Q9H4A3-5;Q9H4A3-6;Q9H4A3-7;Q9H4A3-4	Serine/threonine-protein kinase WNK1	WNK1	12.527	134350000	20	23.6351	23.467	23.7129	24.7305	23.2746	22.4594
	1.01103	-1.38208	F5GXJ9;Q13740-2;Q13740;H7C543;Q13740-3;Q13740-4	F5GXJ9;Q13740-2;Q13740	CD166 antigen	ALCAM	67.162	731010000	78	27.3493	26.8883	26.3878	24.3443	26.1842	25.9506
	0.349852	0.125168	F5GYN4;J3KR44;Q96FW1;F5GYJ8;F5H6Q1;Q96FW1-2;F5H3F0	F5GYN4;J3KR44;Q96FW1;F5GYJ8;F5H6Q1;Q96FW1-2	Ubiquitin thioesterase OTUB1	OTUB1	156.46	3678500000	116	28.0643	28.5047	28.2878	28.2711	28.425	28.5361
	0.17246	-0.0665429	F5GYQ1;P61421;J3QL14;R4GN72;H3BQJ1;H3BQB4;H3BSG7	F5GYQ1;P61421;J3QL14;R4GN72	V-type proton ATPase subunit d 1	ATP6V0D1	22.702	392490000	35	25.0764	25.4682	25.2369	25.1292	25.3748	25.0779
	1.52782	0.533141	F5GZS6;J3KPF3;P08195-2;P08195-3;P08195;P08195-4;F5GZI0;H0YFS2;F5H0E2;F5H867;H0YFX4;F5GZR9	F5GZS6;J3KPF3;P08195-2;P08195-3;P08195;P08195-4	4F2 cell-surface antigen heavy chain	SLC3A2	185.31	4633100000	236	28.6227	28.1183	28.546	28.8898	28.9919	29.0048
	0.910979	2.82587	Q49AN9;F5H013;P62308;A8MWD9;C9JVQ0	Q49AN9;F5H013;P62308;A8MWD9;C9JVQ0	Small nuclear ribonucleoprotein G;Putative small nuclear ribonucleoprotein G-like protein 15	SNRPG;SNRPGP15	12.755	1389900000	24	22.7048	27.482	23.8574	27.7895	27.2389	27.4933
	0.603015	1.23274	F5H039;Q9NQX3;Q9NQX3-2;G3V582;H0YJ30;H0YJR5	F5H039;Q9NQX3;Q9NQX3-2;G3V582;H0YJ30	Gephyrin;Molybdopterin adenylyltransferase;Molybdopterin molybdenumtransferase	GPHN	78.786	430390000	60	22.7063	25.5718	25.1472	25.5308	25.4797	26.1131
	0.866422	1.02466	F5H157;Q15286;Q15286-2;F5H7F8	F5H157;Q15286;Q15286-2	Ras-related protein Rab-35	RAB35	14.663	246670000	31	24.7329	23.2776	22.9579	24.6195	24.812	24.6109
	1.9301	0.942099	F5H1N7;Q6ZU35;A0A1B0GWF1;A0A2R8Y6P1	F5H1N7;Q6ZU35	Uncharacterized protein KIAA1211	KIAA1211	29.898	226920000	49	23.9414	23.991	24.085	25.1245	24.5292	25.19
	1.13081	-1.40866	F5H1Z6;F5H8H3;Q9Y365;H0YH17;H0YFF3;F5GY11;H0YGA9;F5H8G1;H0YGN8;F5H0V7;F5GWK5;F5H5A8;F5H3G8	F5H1Z6;F5H8H3;Q9Y365;H0YH17;H0YFF3;F5GY11;H0YGA9;F5H8G1	PCTP-like protein	STARD10	45.175	230580000	32	25.1794	24.9305	24.9535	22.8218	24.7439	23.2717
	0.085205	-0.0606848	F5H442;Q99816;Q99816-2;J3QRU6;J3QKS4	F5H442;Q99816;Q99816-2	Tumor susceptibility gene 101 protein	TSG101	23.531	438290000	58	25.0484	25.5768	25.2781	25.1057	25.6355	24.98
	1.27487	-0.741823	F8VY35;F5H4R6;P55209-2;P55209;F8VUX1;F8W0J6;H0YIV4;F8W020;F8VXI6;F8W543;F8VVB5;H0YH88;H0YHC3;B7Z4K9	F8VY35;F5H4R6;P55209-2;P55209;F8VUX1;F8W0J6;H0YIV4;F8W020;F8VXI6;F8W543	Nucleosome assembly protein 1-like 1	NAP1L1	219.16	5233500000	110	29.3955	29.4766	29.3878	28.4152	29.2209	28.3982
	3.48485	-0.559916	F5H5P2;P12694;P12694-2;F5GXU9;H0YH31	F5H5P2;P12694;P12694-2;F5GXU9	2-oxoisovalerate dehydrogenase subunit alpha, mitochondrial	BCKDHA	25.741	251790000	43	24.7938	24.8177	24.6789	24.1622	24.2425	24.2058
	0.0331423	-0.0163682	F5H669;Q8N684-2;Q8N684;Q8N684-3;F5H6M0;F5H047;J3QT54;C9J286;C9J323;C9JM38;F5H5B7;F5H1W4;F5H2K8;F5H6P5;F5H6A8;F5GXA3	F5H669;Q8N684-2;Q8N684;Q8N684-3;F5H6M0;F5H047;J3QT54	Cleavage and polyadenylation specificity factor subunit 7	CPSF7	68.564	716740000	63	26.1899	26.2801	25.9725	26.4083	25.9644	26.0207
	1.47864	-1.36333	F5H6E2;O00159-2;O00159-3;O00159;I3L204;I3L501;I3L3Y6;I3L3F5	F5H6E2;O00159-2;O00159-3;O00159	Unconventional myosin-Ic	MYO1C	82.701	533290000	94	26.943	26.2433	26.0514	24.492	25.6358	25.02
	0.894346	-1.01335	F5H6I7;Q6DD88	F5H6I7;Q6DD88	Atlastin-3	ATL3	21.772	132730000	36	24.8933	24.1155	24.3172	22.5432	24.1653	23.5774
	0.394066	0.213411	F5H7S7;Q13576;E7EWC2;Q13576-3;Q13576-2;D6R939;E9PDT6;D6RDK8;D6R999;D6RGC6	F5H7S7;Q13576;E7EWC2;Q13576-3;Q13576-2;D6R939	Ras GTPase-activating-like protein IQGAP2	IQGAP2	180.96	914350000	153	26.1077	26.4532	26.2702	26.5544	26.8105	26.1063
	0.719786	-0.444461	F5H7V9;J3QSU6;P24821-5;P24821-2;P24821-3;P24821-4;P24821;E9PC84;P24821-6;H0YGZ3	F5H7V9;J3QSU6;P24821-5;P24821-2;P24821-3;P24821-4;P24821;E9PC84;P24821-6	Tenascin	TNC	36.348	381580000	74	25.3805	25.8714	25.0755	24.6784	25.1956	25.1199
	0.690331	-0.360404	F5H8F7;Q9UBL3-3;Q9UBL3;Q9UBL3-2;H0YBF6;H0YAQ0	F5H8F7;Q9UBL3-3;Q9UBL3;Q9UBL3-2	Set1/Ash2 histone methyltransferase complex subunit ASH2	ASH2L	23.817	206950000	36	24.0765	24.6737	24.8212	24.2081	24.2527	24.0294
	0.345228	-0.682434	F5H8H2;Q03426;F5H092;F5GXC0;A0A1B0GWC2;F5H163;F5H368;A0A1W2PS16;A0A1B0GWF3	F5H8H2;Q03426;F5H092;F5GXC0;A0A1B0GWC2	Mevalonate kinase	MVK	15.104	136590000	28	24.0816	23.6424	23.7969	24.0993	23.8266	21.5477
	1.18467	-0.212985	H7C3P4;F6S8M0;P15586;P15586-2;F5H4C6;H0YFA9	H7C3P4;F6S8M0;P15586;P15586-2;F5H4C6;H0YFA9	N-acetylglucosamine-6-sulfatase	GNS	62.225	3233100000	97	28.4472	28.4137	28.2976	28.0378	28.28	28.2017
	0.0797038	-0.0458768	F6VRR5;Q9BY77;Q9BY77-2;F8WCX5;Q8WUT1;Q6R954;F8WEE2	F6VRR5;Q9BY77;Q9BY77-2;F8WCX5	Polymerase delta-interacting protein 3	POLDIP3	80.315	996250000	99	26.3349	26.6918	26.7696	26.8578	26.3853	26.4156
	1.62502	-0.58057	F8VPD4;P27708;H7C2E4;H7BZB3;H7C3Z5	F8VPD4;P27708	CAD protein;Glutamine-dependent carbamoyl-phosphate synthase;Aspartate carbamoyltransferase;Dihydroorotase	CAD	185.05	2797600000	274	28.4502	28.3722	28.2584	27.7091	28.0739	27.5561
	0.0229114	-0.018781	F8VRH0	F8VRH0		PCBP2	129.73	1705000000	84	27.1043	27.3791	27.4908	27.8026	27.0365	27.0788
	0.947698	0.435284	F8VUA2;Q9HD42;F8VVT7;F5H875	F8VUA2;Q9HD42;F8VVT7	Charged multivesicular body protein 1a	CHMP1A	10.779	460150000	40	25.1622	25.5269	25.0166	25.7997	25.3673	25.8446
	0.243625	0.342594	F8VVA7;P61923;F8VXB1;F8W156;F8VYZ4;P61923-5;P61923-4;F8VUC5;F8W651;F8VXR1;P61923-3;F8VYK5;F8VYE0;P61923-2	F8VVA7;P61923;F8VXB1;F8W156;F8VYZ4;P61923-5;P61923-4;F8VUC5;F8W651;F8VXR1	Coatomer subunit zeta-1	COPZ1	18.398	1230500000	27	27.3169	27.2975	25.7532	26.7828	27.4754	27.1371
	0.793111	0.409723	F8VVL1;O43583	F8VVL1;O43583	Density-regulated protein	DENR	76.323	318040000	32	24.9392	24.6161	24.7217	25.3876	24.7312	25.3874
	1.26649	-1.81654	F8VYE8;P36873;P36873-2;F8VR82;F8W0W8;A0A087WYY5	F8VYE8;P36873;P36873-2;F8VR82;F8W0W8;A0A087WYY5	Serine/threonine-protein phosphatase;Serine/threonine-protein phosphatase PP1-gamma catalytic subunit	PPP1CC	3.4619	345330000	14	25.3938	25.1865	23.6044	22.2133	23.4477	23.0739
	0.866276	-0.461028	F8W1A4;P54819-2;P54819;F8VY04;P54819-6;P54819-3;P54819-5;F8VZG5;P54819-4;G3V213;F8VPP1	F8W1A4;P54819-2;P54819;F8VY04;P54819-6;P54819-3;P54819-5;F8VZG5;P54819-4	Adenylate kinase 2, mitochondrial;Adenylate kinase 2, mitochondrial;Adenylate kinase 2, mitochondrial, N-terminally processed	AK2	82.056	3541900000	140	28.6959	28.7172	28.544	27.7361	28.5587	28.2793
	0.809123	-0.751364	F8W733;Q9NXR7-4;Q9NXR7-3;Q9NXR7;Q9NXR7-1;C9J2G0;A0A075B7D2	F8W733;Q9NXR7-4;Q9NXR7-3;Q9NXR7;Q9NXR7-1;C9J2G0;A0A075B7D2	BRCA1-A complex subunit BRE	BRE	8.5195	258290000	20	25.2549	24.7903	24.8041	24.4748	24.7132	23.4071
	0.378703	0.114442	F8W7Q4;Q96A26;E9PH05	F8W7Q4;Q96A26;E9PH05	Protein FAM162A	FAM162A	14.781	703750000	46	26.1342	25.7551	25.9758	26.1877	25.9708	26.05
	1.68853	-0.897173	F8W7U8;P49959-2;P49959;P49959-3;F5GXT0;F5H742;F5H256	F8W7U8;P49959-2;P49959;P49959-3	Double-strand break repair protein MRE11A	MRE11A	33.195	228090000	47	24.9743	25.0819	24.7714	23.6206	24.3776	24.1379
	0.137335	0.0698115	F8W930;Q9Y6M1-1;Q9Y6M1;Q9Y6M1-5;Q9Y6M1-6;Q9Y6M1-3;Q9Y6M1-4	F8W930;Q9Y6M1-1;Q9Y6M1;Q9Y6M1-5;Q9Y6M1-6;Q9Y6M1-3;Q9Y6M1-4	Insulin-like growth factor 2 mRNA-binding protein 2	IGF2BP2	140.1	3082700000	200	27.9834	28.1708	28.3103	28.4069	27.9013	28.3659
	0.0614288	-0.218138	F8W9S7;Q14C86-3;Q14C86-4;Q14C86-5;Q14C86-2;Q14C86;Q14C86-6;C9IZ08;B4DGD8;B0QZ65;H0Y7I9;A0A0A0MQV8;H0Y4E7;C9IZX9	F8W9S7;Q14C86-3;Q14C86-4;Q14C86-5;Q14C86-2;Q14C86;Q14C86-6;C9IZ08;B4DGD8;B0QZ65	GTPase-activating protein and VPS9 domain-containing protein 1	GAPVD1	25.747	327110000	31	24.5968	24.4564	22.6652	25.1083	21.6055	24.3501
	0.192825	-0.0724386	F8WA11;Q7Z460-2;Q7Z460-4;Q7Z460-5;Q7Z460-3;Q7Z460;H0Y5T1;C9J151;C9JP76	F8WA11;Q7Z460-2;Q7Z460-4;Q7Z460-5;Q7Z460-3;Q7Z460;H0Y5T1	CLIP-associating protein 1	CLASP1	77.706	926710000	151	26.3527	26.622	26.4974	26.196	26.6133	26.4454
	0.493812	-0.504269	F8WA39;Q13613-2;Q13613;Q8NEC6;H0YDX3;H7BZJ1;E9PIH9;H7C406;E9PPP8	F8WA39;Q13613-2;Q13613;Q8NEC6;H0YDX3	Myotubularin-related protein 1	MTMR1	13.881	109220000	26	23.4695	24.1293	23.881	24.0497	23.2538	22.6635
	1.75908	-0.861423	F8WBW1;Q86X83-2;Q86X83;F8WC41	F8WBW1;Q86X83-2;Q86X83;F8WC41	COMM domain-containing protein 2	COMMD2	17.554	82639000	16	24.0722	24.1884	24.1745	22.8756	23.358	23.6173
	0.480782	0.288743	J3QRU4;F8WCA0;L7N2F9;P63027;K7ENK9;K7EKX0	J3QRU4;F8WCA0;L7N2F9;P63027	Vesicle-associated membrane protein 2	VAMP2	51.33	1011600000	64	26.5648	26.232	26.5831	26.5524	27.216	26.4777
	0.387419	-0.29239	F8WCF6;P59998;P59998-3;F8WDD7;H7C0A3;A0A0A6YYG9;P59998-2;F8WE39;R4GN08;P59998-4;F8WDW3	F8WCF6;P59998;P59998-3;F8WDD7;H7C0A3;A0A0A6YYG9;P59998-2	Actin-related protein 2/3 complex subunit 4	ARPC4-TTLL3;ARPC4	42.093	2430300000	70	28.4348	27.9365	27.4145	27.5046	27.8752	27.5288
	1.31017	0.94005	F8WCN3;P12532;C9JSQ1;P12532-2;C9JJX8;C9J995;C9J8F6	F8WCN3;P12532;C9JSQ1;P12532-2	Creatine kinase U-type, mitochondrial	CKMT1B;CKMT1A	26.719	114450000	19	23.7567	23.4492	22.6667	24.3871	24.0839	24.2218
	0.199981	-0.593608	F8WF48;Q99442;F8WCJ7	F8WF48;Q99442;F8WCJ7	Translocation protein SEC62	SEC62	16.574	342060000	34	24.3636	25.0527	25.2722	22.1973	24.7456	25.9648
	1.66552	0.420127	F8WJN3;Q16630-3;Q16630;Q16630-2;F8W084;A0A3B3ISW1	F8WJN3;Q16630-3;Q16630;Q16630-2	Cleavage and polyadenylation specificity factor subunit 6	CPSF6	234.9	1685400000	88	27.0346	27.2358	27.0643	27.5619	27.352	27.6811
	0.672779	-1.12606	G3V0I5;P49821-2;P49821;B4DE93;E9PQP1;E9PMX3;E9PLC6;E9PPR0;E9PJL9;E9PPS5;E9PPD6;H0YD04;H0YE81	G3V0I5;P49821-2;P49821;B4DE93	NADH dehydrogenase [ubiquinone] flavoprotein 1, mitochondrial	NDUFV1	39.668	514420000	38	25.9506	26.0802	25.8645	24.8717	26.1338	23.5116
	0.644244	-1.12365	G3V198;Q12769;E9PR16;Q12769-2;E9PSI3;Q12769-3	G3V198;Q12769;E9PR16	Nuclear pore complex protein Nup160	NUP160	41.071	254210000	45	24.8104	24.9811	24.9042	24.6303	24.4897	22.2048
	0.438429	-0.222059	G5E9E7;G3V1L9;Q07157-2;Q07157;A0A087X0K9;H0YKB1;H0Y3R8	G5E9E7;G3V1L9;Q07157-2;Q07157;A0A087X0K9	Tight junction protein ZO-1	TJP1	94.438	643060000	112	25.9574	25.8049	26.1742	26.1057	25.7078	25.4567
	1.17142	1.78439	G3V394;Q9Y4I1-3;Q9Y4I1-2;Q9Y4I1;A0A087WY00;F8WE88;F8W6H6;E7ERV5;Q9UES5;O95317;G3V3C9;H0YMK3;Q9NQX4-2;H0YM93;H0YM96	G3V394;Q9Y4I1-3;Q9Y4I1-2;Q9Y4I1;A0A087WY00;F8WE88;F8W6H6	Unconventional myosin-Va	MYO5A	79.057	865700000	138	24.1509	24.4884	26.4187	27.0391	26.7021	26.6699
	0.234775	0.372285	G3V4K3;Q9H9C1-2;Q9H9C1;G3V549	G3V4K3;Q9H9C1-2;Q9H9C1	Spermatogenesis-defective protein 39 homolog	VIPAS39	29.729	72947000	28	23.5341	21.6228	23.4371	23.2315	23.3162	23.1631
	1.47808	-0.42594	G3V5T9;P24941-2;P24941;E7ESI2	G3V5T9;P24941-2;P24941;E7ESI2	Cyclin-dependent kinase 2	CDK2	36.174	304290000	50	25.0962	25.0439	25.2752	24.5772	24.9386	24.6217
	1.44948	-1.51821	G3XAG1;Q96ME7-3;Q96ME7;Q96ME7-2	G3XAG1;Q96ME7-3;Q96ME7;Q96ME7-2	Zinc finger protein 512	ZNF512	34.021	318380000	44	25.5978	25.962	25.2198	24.4557	23.2035	24.5657
	1.39955	1.5556	G3XAI2;P07942;E7EPA6;E9PCS6;C9J296	G3XAI2;P07942	Laminin subunit beta-1	LAMB1	158.23	18192000000	282	28.9699	30.4077	30.0526	31.4126	30.8495	31.8349
	0.599128	-0.74831	G5E975;Q12824-2;Q12824;A0A0G2JRV3;C9JTA6;A0A0G2JSE9;A0A2R8Y5N5;A0A0U1RQQ2;A0A0U1RRB8;B5MCL5;A0A2R8YEE8;A0A2R8YDN6	G5E975;Q12824-2;Q12824;A0A0G2JRV3;C9JTA6;A0A0G2JSE9;A0A2R8Y5N5	SWI/SNF-related matrix-associated actin-dependent regulator of chromatin subfamily B member 1	SMARCB1	32.472	425830000	53	25.48	25.7566	25.533	25.6499	23.7848	25.0899
	0.60732	-0.919845	G5E9A6;P51784;Q5JXD3;Q13107-2;Q13107	G5E9A6;P51784	Ubiquitin carboxyl-terminal hydrolase;Ubiquitin carboxyl-terminal hydrolase 11	USP11	38.811	170660000	36	24.1507	24.5522	24.74	23.2877	22.5858	24.8098
	0.406862	0.185824	P35080-2;G5E9Q6;C9J0J7;C9JQ45;C9J2N0;C9J5V8;F2Z3G0	P35080-2;G5E9Q6;C9J0J7;C9JQ45;C9J2N0	Profilin	PFN2	70.828	6093700000	90	29.0769	29.2028	28.9864	29.3859	29.5214	28.9163
	1.00717	0.476744	G5EA30;Q92879-2;Q92879-3;Q92879-6;Q92879;Q92879-4;Q92879-5;E9PQK4;E9PSH0;E9PKU1;F5H4Y5;F5H0D8;E9PKA1	G5EA30;Q92879-2;Q92879-3;Q92879-6;Q92879;Q92879-4;Q92879-5	CUGBP Elav-like family member 1	CELF1	82.91	1601100000	98	26.7539	27.3109	27.0872	27.6106	27.2323	27.7392
	0.375617	-0.13291	G8JLB6;P31943;E9PCY7;D6RIU0;D6RBM0;D6RFM3;D6RIT2;D6RAM1;E5RGV0;D6R9T0;D6RDU3;D6RJ04;D6RIH9;H0YB39;E7EQJ0;E5RGH4;H0YBD7;E7EN40;H0YBG7;D6RDL0;H0YAQ2;D6RF17;D6R9D3;E5RJ94	G8JLB6;P31943;E9PCY7;D6RIU0;D6RBM0;D6RFM3;D6RIT2;D6RAM1;E5RGV0;D6R9T0;D6RDU3;D6RJ04;D6RIH9	Heterogeneous nuclear ribonucleoprotein H;Heterogeneous nuclear ribonucleoprotein H, N-terminally processed	HNRNPH1	198.61	10596000000	256	30.079	30.2499	30.1136	30.2001	29.7427	30.101
	2.04993	-0.497243	Q5QPK2;H0Y368;O60762;Q5QPJ9	Q5QPK2;H0Y368;O60762;Q5QPJ9	Dolichol-phosphate mannosyltransferase subunit 1	DPM1	43.14	393690000	47	25.5178	25.4157	25.5953	24.9471	25.1914	24.8985
	0.944654	-0.497987	H0Y4B0;O43414-3;O43414-2;O43414;F6QUN3;A0A3B3ISV9;F6UGJ8	H0Y4B0;O43414-3;O43414-2;O43414;F6QUN3;A0A3B3ISV9	ERI1 exoribonuclease 3	ERI3	6.5959	142090000	26	24.0111	24.1473	23.9361	23.7263	23.8154	23.0588
	0.498184	0.0852013	H0Y4Z8;Q3YEC7;Q3YEC7-2;F2Z2T0;G3V154;Q3YEC7-3;Q3YEC7-4;Q3YEC7-5;Q3YEC7-6;H0Y7H6	H0Y4Z8;Q3YEC7;Q3YEC7-2;F2Z2T0;G3V154;Q3YEC7-3;Q3YEC7-4;Q3YEC7-5;Q3YEC7-6	Rab-like protein 6	RABL6	41.659	423700000	66	25.3747	25.3836	25.2213	25.3749	25.516	25.3442
	0.410077	0.245255	H0Y5B4;H7BZ11;J3KQN4;Q969Q0;P83881;R4GN19;H7BY91;H0Y3V9	H0Y5B4;H7BZ11;J3KQN4;Q969Q0;P83881	60S ribosomal protein L36a-like;60S ribosomal protein L36a	RPL36A;RPL36A-HNRNPH2;RPL36AL	11.474	1178800000	46	26.6223	26.806	26.8739	27.2119	26.5298	27.2962
	0.540054	0.188602	P0DP25;P0DP24;P0DP23;H0Y7A7;E7ETZ0;E7EMB3;G3V361;Q96HY3;F8WBR5;G3V226;M0QZ52;G3V479;P27482;C9J7T9;P02585	P0DP25;P0DP24;P0DP23;H0Y7A7;E7ETZ0;E7EMB3;G3V361;Q96HY3		CALM2;CALM1	183.11	28114000000	139	31.423	31.3932	31.2834	31.6288	31.2696	31.767
	0.319645	-0.126021	H0Y8G5;Q14103-3;Q14103;H0YA96;Q14103-4;Q14103-2;D6RAF8;D6RF44;D6RBQ9;D6RD83	H0Y8G5;Q14103-3;Q14103;H0YA96;Q14103-4;Q14103-2;D6RAF8;D6RF44	Heterogeneous nuclear ribonucleoprotein D0	HNRNPD	145.72	21095000000	207	30.6753	31.1799	31.0899	30.8699	30.9244	30.7728
	0.0399016	-0.131028	H0YEH2;Q14671;Q5T1Z4;Q5T1Z8;Q14671-2;Q14671-3;E9PR38;Q14671-4;H0YDK8;H0YDC5;H0YC97;E9PM68;E9PL65;E9PMX1	H0YEH2;Q14671;Q5T1Z4;Q5T1Z8;Q14671-2;Q14671-3;E9PR38;Q14671-4;H0YDK8	Pumilio homolog 1	PUM1	18.624	209250000	31	21.8496	25.0293	24.6822	24.5919	23.6475	22.9287
	0.193354	0.0836557	H0YEX9;P57087-2;P57087;P57087-3	H0YEX9;P57087-2;P57087;P57087-3	Junctional adhesion molecule B	JAM2	5.3398	104300000	14	23.2836	23.2569	23.7271	23.5717	23.3752	23.5718
	0.326215	0.119023	H0YFD6;P40939;A0A2R8Y4F5;A0A2R8YG21;A0A2R8Y688	H0YFD6;P40939;A0A2R8Y4F5;A0A2R8YG21	Trifunctional enzyme subunit alpha, mitochondrial;Long-chain enoyl-CoA hydratase;Long chain 3-hydroxyacyl-CoA dehydrogenase	HADHA	319.7	7519100000	288	29.6505	29.3303	29.3922	29.5221	29.7947	29.4132
	0.178048	0.601823	H0YG54;H0YGR4;Q9Y3B8-2;Q9Y3B8-3;Q9Y3B8;F5GYG5	H0YG54;H0YGR4;Q9Y3B8-2;Q9Y3B8-3;Q9Y3B8;F5GYG5	Oligoribonuclease, mitochondrial	REXO2	60.653	354370000	24	25.9714	25.2266	21.8019	24.9245	24.9696	24.9114
	0.359052	0.505793	H0YI09;Q9H8H3;F8VQX6	H0YI09;Q9H8H3;F8VQX6	Methyltransferase-like protein 7A	METTL7A	33.323	294200000	36	25.2875	23.3602	24.8837	25.0153	25.0424	24.9911
	0.118091	0.0813236	H0YKD8;P46779;P46779-2;P46779-3;H0YMF4;P46779-4;P46779-5;H0YLP6	H0YKD8;P46779;P46779-2;P46779-3;H0YMF4;P46779-4;P46779-5;H0YLP6	60S ribosomal protein L28	RPL28	20.356	3453100000	64	28.2269	28.3944	28.4611	28.4693	28.012	28.845
	1.23939	-1.89115	H0YLF5;P40424-2;P40424-3;P40424;H0YKH1;A0A087X0P4;A0A0A0MTI0;H0YLB0;H0YLD4;H0YLT4;F8WA05;H0YLM3;H0Y5D0	H0YLF5;P40424-2;P40424-3;P40424;H0YKH1;A0A087X0P4;A0A0A0MTI0;H0YLB0;H0YLD4;H0YLT4;F8WA05	Pre-B-cell leukemia transcription factor 1	PBX1	103.31	433900000	69	26.3497	25.8678	26.1239	23.0871	25.5081	24.0728
	0.565573	0.273251	H0YN26;P39687;H7BZ09;O43423;O95626	H0YN26;P39687	Acidic leucine-rich nuclear phosphoprotein 32 family member A	ANP32A	132.87	9673400000	143	29.5605	29.8099	29.7065	30.1751	29.5615	30.16
	0.983645	0.482687	H0YNE9;Q92930;H0YMN7	H0YNE9;Q92930;H0YMN7	Ras-related protein Rab-8B	RAB8B	33.455	462910000	42	25.0921	25.2698	25.3031	25.8974	25.2644	25.9512
	0.362703	0.188063	H0YNG3;P67812-4;P67812;P67812-3;H0YKT4;P67812-2;H0YNX5;H0YNA5;P0C7V7	H0YNG3;P67812-4;P67812;P67812-3;H0YKT4;P67812-2	Signal peptidase complex catalytic subunit SEC11;Signal peptidase complex catalytic subunit SEC11A	SEC11A	14.263	556630000	30	25.5643	26.0139	25.9627	26.0606	25.7405	26.304
	0.011638	0.0123997	H0YNT2;F5H7D6;A0A0D9SES8;H0YKT5;H0YKN8;H0YL70;Q04726-2;Q04726-7;Q04726-3;Q04726-6;Q04726-5;Q04726-4;Q04726;H0YNI7;H0YLI3;H0YKH0;H0YLW9;Q04725-2;K7EMK7;Q04727-2;Q04725;Q04727-4;Q04727;Q04727-3;H3BUH5;K7EK93;K7EQH5;Q5T3G2;H0YKH5;K7EJR7;Q04725-3	H0YNT2;F5H7D6;A0A0D9SES8;H0YKT5;H0YKN8;H0YL70;Q04726-2;Q04726-7;Q04726-3;Q04726-6;Q04726-5;Q04726-4;Q04726;H0YNI7;H0YLI3	Transducin-like enhancer protein 3	TLE3	14.137	178370000	23	23.5967	24.4439	24.56	24.5596	23.9756	24.1025
	0.0187103	0.013696	H3BLU2;Q13449;F5H5G1;C9J5G3	H3BLU2;Q13449;F5H5G1;C9J5G3	Limbic system-associated membrane protein	LSAMP	34.365	1041300000	65	26.7042	26.4048	26.6561	26.7902	26.1539	26.8622
	0.101505	-0.160556	H3BMD8;P56211;H3BTD3;P56211-2;H3BQ52	H3BMD8;P56211;H3BTD3;P56211-2;H3BQ52	cAMP-regulated phosphoprotein 19	ARPP19	4.9351	274740000	18	24.431	24.5937	24.5919	25.2081	23.2971	24.6296
	0.0713599	-0.0847702	H3BV80;H3BMS0;H3BMM9;H3BTC0;Q15287-3;Q15287-2;Q15287;H3BPG5	H3BV80;H3BMS0;H3BMM9;H3BTC0;Q15287-3;Q15287-2;Q15287;H3BPG5	RNA-binding protein with serine-rich domain 1	RNPS1	14.652	692600000	27	25.4322	26.2274	26.3377	25.496	26.5028	25.7442
	0.414388	-0.0790488	H3BNC9;P08708;H0YN88;A0A075B716;H0YN73;A0A0J9YYC4	H3BNC9;P08708;H0YN88;A0A075B716	40S ribosomal protein S17	RPS17	115.32	5067800000	60	29.1328	28.9625	29.0727	28.8794	28.9539	29.0975
	1.40485	-0.754124	H3BS10;H3BP20;P06865;H3BU85;H3BTD4;P06865-2;A0A087WUJ7	H3BS10;H3BP20;P06865;H3BU85;H3BTD4	Beta-hexosaminidase;Beta-hexosaminidase subunit alpha	HEXA	67.646	974830000	54	27.1595	26.5014	27.288	26.1276	26.3241	26.2348
	0.181936	0.0817922	H3BPE1;H3BQK9;Q9UPN3-2;Q9UPN3-3;Q9UPN3;Q9UPN3-4;H0Y390;Q9UPN3-5;E9PNZ4;E9PLY5;H0Y314;E9PLY0;H0Y4F5;A0A0A6YYJ5;H0Y6T5;H0Y7I1;E9PS75;H0YC65	H3BPE1;H3BQK9;Q9UPN3-2;Q9UPN3-3;Q9UPN3;Q9UPN3-4;H0Y390;Q9UPN3-5	Microtubule-actin cross-linking factor 1, isoforms 1/2/3/5	MACF1	323.31	2784200000	544	27.6611	28.0692	28.1062	28.1486	27.8406	28.0927
	0.831838	-0.498568	H3BRL3;O14562;H3BUM8	H3BRL3;O14562;H3BUM8	Ubiquitin domain-containing protein UBFD1	UBFD1	15.991	617280000	40	26.0248	26.1202	26.2435	25.65	26.0898	25.1529
	0.0418549	-0.0364545	H3BRN4;P80404;H3BNQ7;H3BMJ9;H3BPW8;H3BRJ1;H3BRT1	H3BRN4;P80404;H3BNQ7	4-aminobutyrate aminotransferase, mitochondrial	ABAT	140.81	3849600000	211	27.9583	28.8376	28.7936	28.3933	28.4385	28.6484
	0.0956296	-0.385619	H6UMI1;O95166;I3L3J4	H6UMI1;O95166	Gamma-aminobutyric acid receptor-associated protein	GABARAP	13.213	518510000	24	24.4826	25.9034	23.2496	23.2689	22.6354	26.5744
	0.186643	-0.35492	H7C2Z6;H7BXD5;P28676;C9JIZ3;C9JWQ8	H7C2Z6;H7BXD5;P28676	Grancalcin	GCA	15.434	405360000	41	25.1648	25.2037	25.2087	25.8535	25.2283	23.4307
	0.118369	-0.0655746	I1E4Y6;Q6Y7W6-4;Q6Y7W6-5;Q6Y7W6;Q6Y7W6-3;E7ESB6;C9JHW1;F8WCD5;C9JPV7;C9JXQ0;C9J0V6;C9JHT0;C9JRZ2;C9JW88;C9JH18	I1E4Y6;Q6Y7W6-4;Q6Y7W6-5;Q6Y7W6;Q6Y7W6-3;E7ESB6;C9JHW1	PERQ amino acid-rich with GYF domain-containing protein 2	GIGYF2	69.332	197530000	30	24.6353	23.9917	24.2804	24.3616	24.0939	24.2552
	0.43143	-0.219458	I3L0K2;I3L3M7;Q9BRA2;I3L2R6	I3L0K2;I3L3M7;Q9BRA2	Thioredoxin domain-containing protein 17	TXNDC17	19.202	830500000	43	26.2754	26.4283	26.3782	25.8347	26.5505	26.0383
	1.11936	0.482807	I3L0N3;P46459;P46459-2;I3L2G1;I3L0L3;K7EQD6;I3L338;I3L4Q9	I3L0N3;P46459;P46459-2	Vesicle-fusing ATPase	NSF	181.96	5459100000	301	28.7665	28.6185	28.7823	29.3314	28.8207	29.4636
	0.437205	-0.330132	J3QS48;I3L295;J3KT75;J3QW43;J3QRD5;O75352-2;O75352;J3KSI4;I3L1D2;I3L4E0;J3KTK8;J3QQZ4;I3L405;I3L261	J3QS48;I3L295;J3KT75;J3QW43;J3QRD5;O75352-2;O75352;J3KSI4;I3L1D2;I3L4E0;J3KTK8;J3QQZ4;I3L405;I3L261	Mannose-P-dolichol utilization defect 1 protein	MPDU1	5.8852	416810000	27	25.379	25.4599	25.33	24.6009	25.679	24.8986
	0.220737	-0.122131	J3KMZ8;Q92785;Q92785-2;E9PN04	J3KMZ8;Q92785;Q92785-2	Zinc finger protein ubi-d4	DPF2	13.766	241880000	43	24.4942	24.958	24.3211	24.2708	24.6092	24.5268
	1.22103	-0.676832	J3KN16;Q5VYK3;R4GMY1;R4GMY3;F6XAQ5	J3KN16;Q5VYK3;R4GMY1	Proteasome-associated protein ECM29 homolog	KIAA0368;ECM29	84.079	553530000	116	26.2596	26.0027	25.9549	25.0741	25.8711	25.2415
	1.16909	-0.510656	J3KNF8;H3BUX2;O43169;D6RFH4;J3QR91	J3KNF8;H3BUX2;O43169;D6RFH4	Cytochrome b5 type B	CYB5B	228.44	2301000000	104	28.2983	27.9568	27.8654	27.8301	27.4614	27.2971
	0.932702	-0.770297	J3KNQ4;Q9NVD7;E9PS97;Q9NVD7-2;A0A087WZB5;Q9HBI1-3;Q9HBI1;Q9HBI1-2	J3KNQ4;Q9NVD7;E9PS97	Alpha-parvin	PARVA	81.935	627430000	63	26.8893	25.9847	25.9957	25.3852	25.9919	25.1816
	0.0114329	-0.00792567	J3QL05;J3KP15;Q01130-2;Q01130;Q9BRL6-2;Q9BRL6	J3QL05;J3KP15;Q01130-2;Q01130	Serine/arginine-rich splicing factor 2	SRSF2	30.581	3547000000	76	28.2063	28.4821	28.4614	28.788	28.094	28.244
	0.508355	-0.107758	J3KPP4;O95232;D6RDI2;E7EN55;C9JL41;O95232-2;D6RHH0;U3KQT3	J3KPP4;O95232;D6RDI2	Luc7-like protein 3	LUC7L3	323.31	543120000	64	25.5773	25.8128	25.7243	25.7146	25.5018	25.5748
	0.0835661	0.0287596	J3KQ32;Q9NTK5;Q9NTK5-2;Q9NTK5-3;C9JCJ9;C9JTK6	J3KQ32;Q9NTK5;Q9NTK5-2	Obg-like ATPase 1	OLA1	117.28	4952000000	163	28.8051	29.0872	28.8932	28.9372	28.8144	29.1202
	0.300454	-0.0633462	J3KQJ1;Q8NBJ7;C9JL30;C9J660;Q8NBJ7-2;E9PBT8;H7C3B2;A8MXB9;F8WA42;Q8NBJ7-3;E9PG02;J3QT17;Q8NBJ7-5;F8WEX5;F8WEV7;F8WES7;Q8NBJ7-4	J3KQJ1;Q8NBJ7;C9JL30;C9J660;Q8NBJ7-2;E9PBT8;H7C3B2;A8MXB9;F8WA42;Q8NBJ7-3;E9PG02;J3QT17;Q8NBJ7-5	Sulfatase-modifying factor 2	SUMF2	17.536	335820000	29	25.2623	25.0356	24.9859	25.0182	25.0247	25.0509
	0.398632	0.185083	J3KR97;Q9BTW9;Q9BTW9-4;Q9BTW9-5;I3L439;I3L163;I3L143;I3L500;A0A0J9YWI5;A0A0J9YVR1;I3L0V3;I3L3H4;I3L131;I3L4D2;I3L1S3;Q9BTW9-3;A0A0J9YVU1;A0A0J9YYG2;I3L120;A0A0J9YXU4;A0A0J9YY08	J3KR97;Q9BTW9;Q9BTW9-4;Q9BTW9-5	Tubulin-specific chaperone D	TBCD	88.72	751000000	108	26.2673	26.055	25.9551	26.4973	26.4002	25.9352
	0.161655	0.145206	J3KS05;P83916;B5MD17;K7ELA4;C9JWS9	J3KS05;P83916;B5MD17;K7ELA4	Chromobox protein homolog 1	CBX1	233.44	1004600000	61	26.1422	26.5741	26.2663	26.9569	26.572	25.8894
	0.467114	-0.608651	J3KSJ8;Q9UD71;J3KT77;Q9UD71-2	J3KSJ8;Q9UD71;J3KT77;Q9UD71-2	Protein phosphatase 1 regulatory subunit 1B	PPP1R1B	8.9694	47451000	13	23.6948	22.5946	24.4599	23.0652	22.6678	23.1905
	0.254784	-0.205014	J3KTA4;P17844;P17844-2;J3QSF1;J3KRZ1;J3QRQ7;J3KRX8;J3KTQ4;J3QR02;X6RLV5;J3QLG9;J3QR62;J3QRN5	J3KTA4;P17844;P17844-2	Probable ATP-dependent RNA helicase DDX5	DDX5	80.586	4764100000	154	28.7839	29.1736	28.8861	29.0823	28.9965	28.1497
	0.176162	0.133627	J3QR09;J3KTE4;P84098	J3QR09;J3KTE4;P84098	Ribosomal protein L19;60S ribosomal protein L19	RPL19	70.484	4303500000	97	28.6466	28.6451	28.807	29.0287	28.276	29.195
	0.282732	0.444808	J3KTI2;Q9BRT3	J3KTI2;Q9BRT3	Migration and invasion enhancer 1	MIEN1	4.0946	208940000	13	22.467	24.295	22.8603	23.1746	23.5616	24.2204
	0.479475	0.440824	J3KTL2;Q07955;Q07955-3;Q07955-2;J3KSR8;J3QQV5;J3KSW7	J3KTL2;Q07955;Q07955-3;Q07955-2;J3KSR8	Serine/arginine-rich splicing factor 1	SRSF1	35.717	3660300000	113	27.5769	28.4003	28.5213	28.8899	28.0729	28.8582
	0.0221233	0.0323709	J3QK89;Q8IWX8	J3QK89;Q8IWX8	Calcium homeostasis endoplasmic reticulum protein	CHERP	34.148	212050000	45	24.4378	24.6677	23.7649	24.7969	24.6569	23.5138
	0.249852	-0.128236	J3QL71;Q96FV2-2;Q96FV2;J3QQM9;J3QRJ1;J3KT79;J3QR84;J3KS57	J3QL71;Q96FV2-2;Q96FV2;J3QQM9;J3QRJ1	Secernin-2	SCRN2	33.824	259570000	42	24.8724	24.9127	24.9081	25.1751	24.5798	24.5536
	1.04532	-2.98245	J3QLE5;P14678-2;P63162;P14678;P63162-2;P14678-3;J3KRY3;S4R3P3	J3QLE5;P14678-2;P63162;P14678;P63162-2;P14678-3;J3KRY3;S4R3P3	Small nuclear ribonucleoprotein-associated proteins B and B;Small nuclear ribonucleoprotein-associated protein N	SNRPN;SNRPB	8.2778	1431700000	25	26.9308	27.1966	27.4539	23.0124	26.8706	22.7509
	0.518979	0.198537	J3QQ67;Q07020;G3V203;H0YHA7;Q07020-2;F8VYV2;F8VUA6;A0A075B7A0;F8VXR6	J3QQ67;Q07020;G3V203;H0YHA7;Q07020-2;F8VYV2;F8VUA6;A0A075B7A0	60S ribosomal protein L18	RPL18	85.566	4712000000	123	28.6614	28.7131	28.7373	29.1442	28.5833	28.9799
	0.89395	0.508099	J3QRI7;J3QQQ9;J3QQV1;J3QRC4;P61254;J3KSS0	J3QRI7;J3QQQ9;J3QQV1;J3QRC4;P61254;J3KSS0	60S ribosomal protein L26	RPL26	4.6371	686250000	26	25.5124	26.0038	26.0778	26.5771	25.9792	26.562
	0.110215	0.0566133	J3QQY2;J9JIE6;Q9UM00-2;Q9UM00;J3KS45	J3QQY2;J9JIE6;Q9UM00-2;Q9UM00;J3KS45	Transmembrane and coiled-coil domain-containing protein 1	TMCO1	10.313	245540000	18	24.8298	24.4251	24.6822	24.7725	24.4264	24.908
	1.14645	-0.455763	J3QRS3;P19105;O14950	J3QRS3;P19105;O14950	Myosin regulatory light chain 12A;Myosin regulatory light chain 12B	MYL12A;MYL12B	155.82	4775800000	141	29.2696	28.9321	29.1893	28.361	28.8242	28.8384
	0.551771	1.07818	J3QRS9;X6R4W8;O43670-2;O43670;O43670-4;O43670-3;J3KS31;J3QS27;J3KTL1;J3KRB6;J3KRW6;H0Y3M2	J3QRS9;X6R4W8;O43670-2;O43670;O43670-4;O43670-3;J3KS31	BUB3-interacting and GLEBS motif-containing protein ZNF207	ZNF207	70.377	721490000	46	25.9243	26.4403	23.6647	26.2284	26.3222	26.7132
	0.627475	0.522341	J3QRU1;P07947;Q573B4;H0Y3C5;J3KPD6;F6SF04;P07948-2;P08631-3;P08631-2;P06239;P07948;P08631-4;P08631;P06239-3	J3QRU1;P07947	Non-specific protein-tyrosine kinase;Tyrosine-protein kinase Yes	YES1	22.82	236760000	46	23.8217	24.8634	24.2101	25.0345	24.3824	25.0453
	0.207612	-0.301568	J3QSB5;Q9Y3U8;J3KTD3	J3QSB5;Q9Y3U8	60S ribosomal protein L36	RPL36	4.3818	1978700000	33	27.3295	27.6186	27.7724	27.1118	26.4152	28.2889
	0.233232	0.256885	J3QSH4;Q14119;J9JIC7	J3QSH4;Q14119;J9JIC7	Vascular endothelial zinc finger 1	VEZF1	12.837	106410000	31	22.9122	23.7603	23.4715	24.1638	22.9656	23.7853
	0.28517	0.145568	J3QT28;O43684-2;O43684;J3QSX4	J3QT28;O43684-2;O43684	Mitotic checkpoint protein BUB3	BUB3	76.439	2414200000	98	27.7214	27.7737	27.896	28.0927	27.5478	28.1873
	0.971834	0.741098	J3QTB2;J3QTA6;Q9BRQ6;H0Y922	J3QTB2;J3QTA6;Q9BRQ6	MICOS complex subunit MIC25	CHCHD6	11.385	233120000	36	23.6334	24.2057	24.2808	24.7912	24.2686	25.2834
	0.599713	0.264837	K4DI93;Q13620-1;Q13620;Q13620-3;A6NE76	K4DI93;Q13620-1;Q13620;Q13620-3	Cullin-4B	CUL4B	139.84	1015100000	95	26.1549	26.4894	26.4632	26.9522	26.3931	26.5567
	0.816482	-0.329096	K7EJH8	K7EJH8		ACTN4	9.1829	486980000	23	25.6588	25.8635	25.7835	25.1972	25.7838	25.3375
	0.724499	0.637089	K7EK07;P84243;K7EMV3;B4DEB1;K7ES00;Q16695;Q6NXT2;K7EP01	K7EK07;P84243;K7EMV3;B4DEB1;K7ES00;Q16695;Q6NXT2	Histone H3;Histone H3.3;Histone H3.1t;Histone H3.3C	H3F3B;H3F3A;HIST3H3;H3F3C	85.741	7720300000	75	28.8804	29.0252	29.1044	30.0074	28.847	30.0668
	0.553165	-0.0419267	K7EQ55;K7EK33;Q96EP5-2;Q96EP5;K7EQ02	K7EQ55;K7EK33;Q96EP5-2;Q96EP5;K7EQ02	DAZ-associated protein 1	DAZAP1	37.192	916020000	65	26.49	26.5641	26.5832	26.4716	26.5066	26.5332
	0.100938	-0.0382093	K7EKE6;P36776-2;P36776;K7EJE8;P36776-3;K7ER27;K7ERR6;K7EQF8;K7ER56	K7EKE6;P36776-2;P36776;K7EJE8;P36776-3	Lon protease homolog, mitochondrial	LONP1	308.63	3087500000	228	28.3791	28.0852	28.1913	28.0639	28.3906	28.0864
	0.541066	0.191068	K7ELC2;P62841;K7EJ78;K7EQJ5	K7ELC2;P62841;K7EJ78;K7EQJ5	40S ribosomal protein S15	RPS15	289.9	3534600000	101	28.0824	28.5876	28.4937	28.5834	28.604	28.5494
	0.663766	-0.363528	K7ELG9;Q3MHD2;Q3MHD2-2	K7ELG9;Q3MHD2;Q3MHD2-2	Protein LSM12 homolog	LSM12	46.99	376120000	34	25.598	24.9469	24.9077	24.929	24.856	24.577
	0.275377	0.185533	K7ELL7;P14314-2;P14314;K7EPW7;K7EKX1;K7EJ70;A0A0C4DGP4;K7EIP3	K7ELL7;P14314-2;P14314	Glucosidase 2 subunit beta	PRKCSH	225.2	14859000000	193	30.4673	30.2835	30.6003	30.7513	30.149	31.0073
	0.190975	-0.178492	K7ER15;Q9H0R4;K7EMY7;K7EQD2;K7EJQ8;A0A1B0GXB1;Q9H0R4-2;K7EKX8	K7ER15;Q9H0R4;K7EMY7;K7EQD2;K7EJQ8;A0A1B0GXB1;Q9H0R4-2	Haloacid dehalogenase-like hydrolase domain-containing protein 2	HDHD2	45.737	1190400000	88	26.7575	27.2553	27.035	26.2754	27.4105	26.8264
	0.356814	-0.888673	K7ES70;P55083;P55083-2	K7ES70;P55083;P55083-2	Microfibril-associated glycoprotein 4	MFAP4	30.952	807300000	38	27.1683	26.262	25.8992	23.623	26.5326	26.5079
	0.468532	-0.741849	K7ESP4;Q8WVC6;Q8WVC6-2	K7ESP4;Q8WVC6;Q8WVC6-2	Dephospho-CoA kinase domain-containing protein	DCAKD	13.238	188690000	31	24.8743	24.5395	24.1104	24.2069	24.6028	22.4889
	0.269787	-0.645224	L0R6Q1	L0R6Q1		SLC35A4	9.2176	150690000	16	24.9145	23.8138	22.4252	22.3636	24.3309	22.5234
	1.01987	-0.717139	M0QWZ7;Q9NP81;M0R2C6;B4DJM9;Q9NP81-2;M0R259;M0QX29;M0R1C0;M0R2H5	M0QWZ7;Q9NP81;M0R2C6;B4DJM9;Q9NP81-2	Serine--tRNA ligase, mitochondrial	SARS2	49.622	124780000	27	23.6243	24.0051	24.0602	23.2794	22.6166	23.6423
	0.731222	-0.396177	M0QXB4;O14579;O14579-2;O14579-3;M0R061	M0QXB4;O14579;O14579-2;O14579-3	Coatomer subunit epsilon	COPE	115.06	1779900000	114	27.9835	27.4622	27.5507	26.9825	27.6255	27.1998
	0.622611	-0.661911	M0R0P1;M0R299;M0QXL5;M0R2Q4;P22087;M0R2U2;M0R1H0;M0R2B0;A6NHQ2	M0R0P1;M0R299;M0QXL5;M0R2Q4;P22087;M0R2U2;M0R1H0;M0R2B0;A6NHQ2	rRNA 2-O-methyltransferase fibrillarin;rRNA/tRNA 2-O-methyltransferase fibrillarin-like protein 1	FBL;FBLL1	10.767	297870000	22	24.6159	25.4547	25.008	23.9606	25.1886	23.9438
	0.154905	0.160154	M0R0N4;M0QYZ2;P53680;X6R390;P53680-2;M0QZ21;M0R1S0	M0R0N4;M0QYZ2;P53680;X6R390;P53680-2;M0QZ21	AP-2 complex subunit sigma	AP2S1	33.009	998310000	52	26.3797	26.3917	26.5851	27.2793	26.5976	25.96
	0.115982	-0.0517794	M0R0F0;P46782;M0R0R2;M0QZN2	M0R0F0;P46782;M0R0R2;M0QZN2	40S ribosomal protein S5;40S ribosomal protein S5, N-terminally processed	RPS5	135.9	3118400000	128	28.0802	28.2869	28.5849	28.3554	28.1281	28.3131
	0.713424	-0.134092	M0R165;Q9UBC2-3;Q9UBC2;Q9UBC2-2;Q9UBC2-4;M0R2S2;M0R3I1;M0R1V5;K7EJR2;M0R330;M0QX30	M0R165;Q9UBC2-3;Q9UBC2;Q9UBC2-2;Q9UBC2-4;M0R2S2	Epidermal growth factor receptor substrate 15-like 1	EPS15L1	174.82	1337300000	169	27.1083	26.9604	27.1124	26.7878	27.0113	26.9797
	2.07715	-1.0514	M0R2B7;P28340;M0QZR8;A0A2R8Y7K6;A0A2R8Y705;M0QZB4;M0QXE6;M0QXQ2;M0R3H8	M0R2B7;P28340;M0QZR8;A0A2R8Y7K6;A0A2R8Y705	DNA polymerase;DNA polymerase delta catalytic subunit	POLD1	25.732	233650000	34	25.4339	25.1116	24.9088	23.8397	24.0876	24.3728
	0.410611	0.225797	M0R2Z9;Q8IX01-4;Q8IX01;Q8IX01-3;M0R3F6;M0R2Y3;M0R065;M0R216	M0R2Z9;Q8IX01-4;Q8IX01;Q8IX01-3;M0R3F6	SURP and G-patch domain-containing protein 2	SUGP2	81.788	1191500000	160	26.1649	26.754	26.9315	26.7963	26.8329	26.8986
	0.593915	0.655853	M0R366;Q9BTV5;M0R2F6;M0R1R0	M0R366;Q9BTV5	Fibronectin type III and SPRY domain-containing protein 1	FSD1	37.14	259850000	39	23.2694	24.9003	24.2996	25.0668	24.7323	24.6379
	0.494185	-0.0944157	O00116;A0A1B0GWA2;A0A2R8YEL0;B8ZZ81	O00116;A0A1B0GWA2;A0A2R8YEL0	Alkyldihydroxyacetonephosphate synthase, peroxisomal	AGPS	43.077	489480000	63	25.6654	25.5677	25.7	25.4811	25.6965	25.4723
	0.700648	0.347615	O00139-4;O00139-2;O00139-1;O00139-5;O00139;D6R9M0;H0Y8H2;H0Y5Z9;D6RD93;Q8N4N8	O00139-4;O00139-2;O00139-1;O00139-5;O00139	Kinesin-like protein KIF2A	KIF2A	63.535	1125700000	132	26.2196	26.7819	26.6528	27.1974	26.7445	26.7553
	0.59446	-0.518931	O00148;O00148-2;O00148-3;K7EQN7;K7EPJ3;K7EN69;K7ENP6;K7EL56;K7EIL8;A0A0D9SEM9	O00148;O00148-2;O00148-3;K7EQN7	ATP-dependent RNA helicase DDX39A	DDX39A	18.326	138880000	27	23.5024	24.7526	24.4243	23.6551	23.9203	23.547
	0.366431	-0.351386	O00151	O00151	PDZ and LIM domain protein 1	PDLIM1	79.626	865240000	69	26.57	26.0418	26.9053	26.5118	26.4188	25.5323
	0.707566	0.31601	O00154-4;O00154-6;O00154-7;O00154;O00154-5;K7EKP8;O00154-2;O00154-3	O00154-4;O00154-6;O00154-7;O00154;O00154-5;K7EKP8;O00154-2;O00154-3	Cytosolic acyl coenzyme A thioester hydrolase	ACOT7	56.293	3262000000	148	27.7857	28.3563	28.1488	28.3025	28.6474	28.2889
	0.541276	0.190578	O00170;E9PMH2;V9GYQ3	O00170;E9PMH2;V9GYQ3	AH receptor-interacting protein	AIP	39.463	285920000	38	24.6895	24.947	24.6515	25.1644	24.9627	24.7325
	0.253332	-0.093413	O00178;B0QY59;F5H257;F5H716	O00178	GTP-binding protein 1	GTPBP1	89.793	603780000	79	25.8061	25.8478	26.0911	25.6332	26.0339	25.7977
	0.119713	-0.0793667	O00186	O00186	Syntaxin-binding protein 3	STXBP3	27.178	213980000	44	24.5014	24.4769	24.5233	24.0514	24.8746	24.3374
	0.399961	-0.156706	O00203-3;O00203;H0YBD0;F5GWU4	O00203-3;O00203	AP-3 complex subunit beta-1	AP3B1	75.678	842600000	116	26.6664	26.2525	26.1932	26.3445	26.2057	26.0917
	0.440305	-0.980169	O00217;E9PN51;F8W9K7;E9PPW7;E9PKH6;Q08E91	O00217;E9PN51;F8W9K7;E9PPW7;E9PKH6	NADH dehydrogenase [ubiquinone] iron-sulfur protein 8, mitochondrial	NDUFS8	15.131	320050000	28	25.5956	25.5419	24.6689	25.7351	22.6181	24.5126
	0.496781	-0.102724	O00231;O00231-2;J3QRY4;J3QS13;J3KSW3	O00231;O00231-2	26S proteasome non-ATPase regulatory subunit 11	PSMD11	137.93	5816100000	239	29.1916	29.1405	29.2002	29.212	29.1023	28.9098
	0.268341	0.0986423	O00232;O00232-2;J3KTJ5;J3KSK1	O00232;O00232-2	26S proteasome non-ATPase regulatory subunit 12	PSMD12	208.83	4684800000	198	28.6538	28.731	28.7713	28.9322	28.9866	28.5331
	0.442384	-0.255143	O00233;J3KN29;F5H5V4;F5GX23;O00233-2;F5H7X1;F5H169;O00233-3	O00233;J3KN29;F5H5V4;F5GX23;O00233-2	26S proteasome non-ATPase regulatory subunit 9	PSMD9	21.273	404210000	51	25.8288	25.1764	25.3945	25.0952	25.0175	25.5217
	0.447583	0.282819	O00264;O00264-2	O00264;O00264-2	Membrane-associated progesterone receptor component 1	PGRMC1	200.09	9009100000	159	29.5943	29.6287	29.7058	29.96	29.4423	30.3749
	0.728297	-1.09436	O00267-2;O00267;M0QYL9	O00267-2;O00267	Transcription elongation factor SPT5	SUPT5H	72.481	492720000	69	25.5752	26.0052	25.7319	25.6899	23.3934	24.9459
	0.0981381	-0.0461801	O00273;O00273-2;K7ERT1	O00273;O00273-2	DNA fragmentation factor subunit alpha	DFFA	29.89	313030000	43	25.2266	24.8169	25.1583	25.1563	24.8005	25.1064
	0.313449	-0.1189	O00291-4;O00291;O00291-3;C9JMG5	O00291-4;O00291;O00291-3	Huntingtin-interacting protein 1	HIP1	63.497	490930000	81	25.343	25.6758	25.7395	25.638	25.3119	25.4517
	0.897703	-0.203658	O00299	O00299	Chloride intracellular channel protein 1	CLIC1	137	9070700000	181	29.9881	29.9618	29.9507	29.5816	29.9461	29.7619
	1.08473	-0.472307	O00303;H0YDT6;E9PQV8;A0A1W2PP79	O00303	Eukaryotic translation initiation factor 3 subunit F	EIF3F	89.725	2393200000	104	28.1637	28.0386	28.1311	27.493	28.0366	27.3869
	1.08439	0.576013	O00330-3;O00330;E9PLU0;E9PRI6;O00330-2;H0YD97	O00330-3;O00330;E9PLU0;E9PRI6	Pyruvate dehydrogenase protein X component, mitochondrial	PDHX	55.957	294210000	45	24.4266	24.5077	24.2471	24.6607	24.8118	25.4368
	0.213234	-0.32846	O00399;E5RK00	O00399	Dynactin subunit 6	DCTN6	9.8709	188640000	21	23.1471	24.5016	24.8959	23.4787	23.6852	24.3955
	1.44569	-0.262089	O00410;O00410-3;H0Y8C6;O00410-2;E7ETV3;E7EQT5;C9JMV5;E7EV12;C9JZD8;E7EWK4;E7EX05;C9JZ53;C9JQT6;E7ESA1;E7ESZ1;E7ETV8;C9J875;C9JXE0	O00410;O00410-3;H0Y8C6;O00410-2	Importin-5	IPO5	323.31	14004000000	433	30.4487	30.7284	30.6068	30.3418	30.3672	30.2886
	0.00794501	-0.00366847	X6RAL5;O00422;U3KPY7;H7BZW6;U3KQ12	X6RAL5;O00422;U3KPY7;H7BZW6	Histone deacetylase complex subunit SAP18	SAP18	26.176	642460000	50	25.6751	26.0604	25.9333	25.7596	25.8128	26.0854
	1.21065	-0.419673	O00425;O00425-2;F8WD15	O00425	Insulin-like growth factor 2 mRNA-binding protein 3	IGF2BP3	130.69	2061500000	144	27.9164	27.7219	27.8849	27.1845	27.703	27.3768
	0.136807	-0.0658569	O00442;O00442-2;A6NIC1	O00442;O00442-2	RNA 3-terminal phosphate cyclase	RTCA	66.75	479400000	48	25.2389	25.7004	25.639	25.3828	25.6647	25.3332
	0.332782	-0.277627	O00461;F8W785	O00461;F8W785	Golgi integral membrane protein 4	GOLIM4	16.069	149880000	20	24.532	24.0446	24.35	24.5922	23.9917	23.5098
	0.538497	-0.931859	O00462;A0A2R8YEC9;E9PFW2;A0A2R8Y524;A0A2R8YCE9;A0A2R8Y4U7;A0A2R8YE79;A0A2R8Y211;A0A2R8Y7A0;A0A2R8Y7A7;A0A2R8Y7N1	O00462;A0A2R8YEC9;E9PFW2;A0A2R8Y524;A0A2R8YCE9;A0A2R8Y4U7;A0A2R8YE79	Beta-mannosidase	MANBA	23.627	214620000	35	25.9846	23.6473	24.5936	23.1107	24.134	24.1853
	0.0855826	0.0446994	O00468-6;O00468-7;O00468-3;O00468-5;O00468-4;O00468;A0A087X208;O00468-2;H0Y5U1	O00468-6;O00468-7;O00468-3;O00468-5;O00468-4;O00468;A0A087X208;O00468-2	Agrin;Agrin N-terminal 110 kDa subunit;Agrin C-terminal 110 kDa subunit;Agrin C-terminal 90 kDa fragment;Agrin C-terminal 22 kDa fragment	AGRN	64.389	676410000	89	26.0694	26.1598	26.2073	25.8425	26.2784	26.4497
	0.28675	-0.230318	O00469-2;E7ETU9;O00469;O00469-3;C9JXZ0;F8WEW3	O00469-2;E7ETU9;O00469;O00469-3	Procollagen-lysine,2-oxoglutarate 5-dioxygenase 2	PLOD2	60.489	975060000	104	27.209	26.2138	26.3234	26.3511	26.4847	26.2194
	0.0726603	-0.0524712	O00471;F8W9B8;A0A0A0MSI8;G3V377	O00471;F8W9B8;A0A0A0MSI8	Exocyst complex component 5	EXOC5	50.825	311850000	55	24.6781	25.281	24.9413	24.6472	25.2657	24.8302
	0.275536	-0.17425	O00487;C9JW37	O00487	26S proteasome non-ATPase regulatory subunit 14	PSMD14	56.229	2899800000	83	28.4814	27.9725	28.1971	28.3281	28.1595	27.6407
	0.754237	-0.204901	O00499-3;O00499-5;O00499;O00499-9;O00499-10;O00499-7;O00499-8;O00499-4;O00499-6;O00499-11;O00499-2;S4R418;A0A0A0MT10;A0A087X188;Q9UBW5-2;Q9UBW5-3;Q9UBW5	O00499-3;O00499-5;O00499;O00499-9;O00499-10;O00499-7;O00499-8;O00499-4;O00499-6;O00499-11;O00499-2	Myc box-dependent-interacting protein 1	BIN1	35.307	463050000	51	26.047	25.6871	25.7135	25.7015	25.5464	25.585
	0.618907	0.17903	O00505;H0Y4S9	O00505	Importin subunit alpha-4	KPNA3	153.97	1525300000	106	26.87	27.1915	27.2291	27.2171	27.4009	27.2097
	2.15578	0.433655	O00560-2;O00560;B4DHN5;E9PBU7;G5EA09;O00560-3	O00560-2;O00560;B4DHN5;E9PBU7;G5EA09;O00560-3	Syntenin-1	SDCBP	106.77	1083800000	85	26.3041	26.5102	26.4872	26.9094	26.7593	26.9338
	0.736539	-0.566062	O00567;Q5JXT2;H0YDU4;H0Y653	O00567;Q5JXT2	Nucleolar protein 56	NOP56	29.31	808280000	69	25.7538	26.7714	26.5968	25.5252	25.8212	26.0774
	0.16043	0.1475	O00592-2;O00592	O00592-2;O00592	Podocalyxin	PODXL	40.74	1425700000	35	27.0312	26.6613	27.6132	27.4459	27.4644	26.8377
	0.127435	-0.312676	O00625	O00625	Pirin	PIR	6.6173	167980000	22	23.6732	24.2342	23.2352	23.8725	21.7479	24.5842
	1.11142	0.42791	O00629;H7C4F6	O00629	Importin subunit alpha-3	KPNA4	58.342	1412000000	62	26.6428	27.015	26.962	27.4008	27.027	27.4758
	1.05018	0.504475	O00743;O00743-3;O00743-2;Q5T1S7	O00743;O00743-3;O00743-2	Serine/threonine-protein phosphatase 6 catalytic subunit;Serine/threonine-protein phosphatase 6 catalytic subunit, N-terminally processed	PPP6C	19.94	375360000	50	24.8241	24.9622	25.0346	25.5465	25.0284	25.7595
	0.681498	-0.380245	O00754-2;O00754;M0QZ24;M0R174;M0QZG6;M0R2P5	O00754-2;O00754	Lysosomal alpha-mannosidase;Lysosomal alpha-mannosidase A peptide;Lysosomal alpha-mannosidase B peptide;Lysosomal alpha-mannosidase C peptide;Lysosomal alpha-mannosidase D peptide;Lysosomal alpha-mannosidase E peptide	MAN2B1	68.412	1081000000	105	27.2304	26.5662	26.8146	26.278	26.8121	26.3803
	0.330162	0.156139	O00764;F2Z2Y4;O00764-2;O00764-3;A8MV33	O00764;F2Z2Y4;O00764-2;O00764-3	Pyridoxal kinase	PDXK	95.809	2017500000	117	27.9096	27.2839	27.4828	27.7928	27.5924	27.7596
	1.18582	-0.483518	O14497;O14497-2;H0Y488;A0A1B0GTU5;O14497-3;A0A087WUV6;H0YCU6;H0YEW5	O14497;O14497-2;H0Y488;A0A1B0GTU5;O14497-3	AT-rich interactive domain-containing protein 1A	ARID1A	101.36	503500000	106	25.6578	25.8329	25.8974	25.2066	25.0714	25.6595
	0.778135	0.421771	O14531;Q5T0Q6	O14531;Q5T0Q6	Dihydropyrimidinase-related protein 4	DPYSL4	219.41	6717400000	274	28.6384	29.4241	29.2312	29.6529	29.5324	29.3736
	0.389794	-0.492324	O14558;A0A1X7SC65;K7EP04	O14558;A0A1X7SC65;K7EP04	Heat shock protein beta-6	HSPB6	23.811	798290000	55	27.376	25.679	26.1081	25.9799	26.1118	25.5945
	0.48675	-0.221109	O14561;I3L505;H3BNK3	O14561;I3L505	Acyl carrier protein, mitochondrial;Acyl carrier protein	NDUFAB1	5.7078	607360000	18	26.4531	25.9896	26.0363	25.675	26.0654	26.0753
	0.0354491	-0.0262629	P47813;O14602;X6RAC9;A6NJH9	P47813;O14602;X6RAC9;A6NJH9	Eukaryotic translation initiation factor 1A, X-chromosomal;Eukaryotic translation initiation factor 1A, Y-chromosomal	EIF1AX;EIF1AY	32.418	1250500000	59	26.6568	27.2698	26.9035	26.7035	26.7806	27.2672
	0.243233	-0.14301	O14617-4;O14617;O14617-5;O14617-2;O14617-3;A0A2R8Y611;A0A2R8Y4J3;A0A087WYN6;K7ERW8	O14617-4;O14617;O14617-5;O14617-2;O14617-3;A0A2R8Y611	AP-3 complex subunit delta-1	AP3D1	65.014	998100000	125	26.737	26.5634	26.5007	26.0788	26.8446	26.4486
	0.158587	0.0934868	O14737;K7EQA1;O14737-2;K7ESJ4;Q3HM38;X6R2P6	O14737;K7EQA1;O14737-2	Programmed cell death protein 5	PDCD5	11.871	1363200000	38	26.8046	26.7136	26.8385	27.3134	26.6923	26.6315
	0.220342	-0.131632	O14744;O14744-2;O14744-5;O14744-3;O14744-4;H0YJX6;H0YJ77;G3V580;G3V2L6;G3V5L5;G3V2X6;C9JSX3;G3V5T6;H0YJD3;H7BZ44;G3V507;G3V2F5	O14744;O14744-2;O14744-5;O14744-3;O14744-4;H0YJX6	Protein arginine N-methyltransferase 5;Protein arginine N-methyltransferase 5, N-terminally processed	PRMT5	117.57	2214100000	157	27.6488	27.9111	27.9579	27.3697	28.0986	27.6547
	0.0828254	-0.063755	O14745;O14745-2;J3QRP6;J3QRA3	O14745;O14745-2;J3QRP6	Na(+)/H(+) exchange regulatory cofactor NHE-RF1	SLC9A3R1	93.464	3170100000	168	28.6203	27.8717	28.531	28.5486	28.144	28.139
	0.223523	0.135571	O14776-2;O14776;G3V220;Q5VWI1	O14776-2;O14776;G3V220	Transcription elongation regulator 1	TCERG1	85.742	1746700000	152	27.0839	27.3795	27.4073	27.5579	27.0089	27.7106
	1.67017	0.105118	O14787-2;O14787;A0A075B780;K7ESC1;K7ENW1;K7EMA3;K7ESG1	O14787-2;O14787;A0A075B780	Transportin-2	TNPO2	100.43	1132600000	115	26.7773	26.7717	26.7862	26.8335	26.8854	26.9316
	0.116686	0.0499757	O14818;O14818-2;H0Y586;O14818-4;Q8TAA3-2;Q8TAA3-5;Q8TAA3;A0A087WYS6;F5GY34	O14818;O14818-2;H0Y586	Proteasome subunit alpha type-7	PSMA7	232.3	8473700000	175	29.3479	29.6999	29.8588	29.655	29.6398	29.7617
	0.526871	0.237172	O14828-2;O14828	O14828-2;O14828	Secretory carrier-associated membrane protein 3	SCAMP3	21.92	285130000	38	24.3962	24.678	24.8273	24.8093	25.1605	24.6431
	0.664184	-0.983364	Q5VV89;O14880;Q5VV87	Q5VV89;O14880;Q5VV87	Microsomal glutathione S-transferase 3	MGST3	43.924	400160000	37	25.369	25.3057	25.7994	25.0914	23.2046	25.2279
	0.331667	-0.316967	O14910;H0YIA8;H0YI92;J3KN23;Q9HAP6;Q9HAP6-2	O14910;H0YIA8;H0YI92	Protein lin-7 homolog A	LIN7A	8.8396	111740000	17	24.7453	23.7269	23.7335	24.0923	23.3953	23.7671
	0.172772	0.101634	O14936;A0A2U3TZM1;A0A2R8YE77;O14936-3;O14936-4;O14936-6;O14936-2;A0A2U3TZN6;A0A2U3TZM4;A0A2R8Y6F8;A0A2R8YFN5;A0A2R8YEK3;Q5JS74;A0A2R8Y3B3;Q5JS72;O14936-5;Q5JS79;A0A2R8YEJ7;A0A2R8YGH2;A0A2R8Y4K4;A0A2R8Y6D8;A0A2R8Y472;A0A2R8Y7X6	O14936;A0A2U3TZM1;A0A2R8YE77;O14936-3;O14936-4;O14936-6;O14936-2;A0A2U3TZN6;A0A2U3TZM4;A0A2R8Y6F8;A0A2R8YFN5;A0A2R8YEK3;Q5JS74;A0A2R8Y3B3	Peripheral plasma membrane protein CASK	CASK	74.718	1371500000	123	27.2575	26.6207	26.9328	27.2079	27.115	26.7932
	1.25788	0.337239	O14964;O14964-2;I3L1P5;I3L1E3;I3L165;I3L2H4	O14964;O14964-2	Hepatocyte growth factor-regulated tyrosine kinase substrate	HGS	80.621	1254800000	94	26.5931	26.8186	26.7946	27.0853	26.8874	27.2454
	0.346667	0.175537	O14974;O14974-5;O14974-4;O14974-3;O14974-2;F8VZN8;H0YHI8;A0A3B3ISH4;H0YIM2;H0YIS3;H0YIS4;F8VW28;A0A0U1RQZ1;H0YHL8	O14974;O14974-5;O14974-4;O14974-3;O14974-2;F8VZN8	Protein phosphatase 1 regulatory subunit 12A	PPP1R12A	164.88	823580000	95	26.2626	26.1654	26.2129	26.5871	25.9732	26.6072
	0.642089	-0.155104	O14980;C9JKM9;C9J673;C9IZS4;C9JQ02;C9JV99;F8WF71;H7BZC5;C9JF49;C9IYM2	O14980	Exportin-1	XPO1	317.55	10517000000	443	30.0772	30.1483	29.9924	29.719	30.0152	30.0185
	0.542439	-0.749482	O14994;A0A0A0MR68;Q4TT46;A6ZJ82;A0A087WTG8	O14994;A0A0A0MR68	Synapsin-3	SYN3	14.041	54912000	20	23.6188	22.6438	23.7217	22.4157	23.5226	21.7976
	0.61135	0.292754	O15020;O15020-2;A4QPE4;E9PJZ2	O15020;O15020-2;A4QPE4	Spectrin beta chain, non-erythrocytic 2	SPTBN2	90.392	967520000	165	26.3291	26.3572	26.5232	27.1008	26.5608	26.4261
	0.0144579	0.0085125	O15031;A6QRG9;E2PU09;A0A087WU36;A6QRH1;H0YAM9;F5H3A2;Q9Y4D7;H0Y7X5;H0Y6J7	O15031	Plexin-B2	PLXNB2	141.08	907560000	132	26.2527	26.4106	26.664	26.6013	26.6081	26.1435
	0.477542	-0.395765	O15042-2;O15042;E7ET15;E7EW00;H0Y8D9;O15042-3;C9JDJ7;C9J5L1;H7C4V2;U3KPT1	O15042-2;O15042;E7ET15;E7EW00;H0Y8D9;O15042-3	U2 snRNP-associated SURP motif-containing protein	U2SURP	30.154	465670000	88	25.0626	25.7879	25.6003	25.5857	25.0849	24.5928
	1.34551	1.25824	O15066;O15066-2;F8WAR6;F8WER6;O14782	O15066	Kinesin-like protein KIF3B;Kinesin-like protein KIF3B, N-terminally processed	KIF3B	51.949	251190000	53	22.5777	23.8585	23.8885	24.8347	24.6258	24.6389
	1.69173	-0.422827	O15067;H0YGH1;J3QSG0;J3QSH6;J3KTL4;J3KT98;J3KTQ5	O15067	Phosphoribosylformylglycinamidine synthase	PFAS	216.79	2545800000	222	28.1671	28.2043	28.2362	27.6848	28.0022	27.6521
	1.08201	1.32396	O15075;O15075-2;O15075-4;Q5VZY9;O15075-3	O15075;O15075-2;O15075-4	Serine/threonine-protein kinase DCLK1	DCLK1	140.81	3725300000	155	26.5656	28.3486	28.0695	29.1895	28.6793	29.0867
	1.29795	-0.728454	O15116;E5RJ47;E5RH18	O15116;E5RJ47;E5RH18	U6 snRNA-associated Sm-like protein LSm1	LSM1	16.605	333160000	31	25.1823	25.1517	25.3716	24.1147	24.9822	24.4235
	0.214779	0.183075	O15118;K7EQ23;O15118-2	O15118;K7EQ23;O15118-2	Niemann-Pick C1 protein	NPC1	20.865	211030000	35	23.507	24.4223	24.3671	23.9881	24.3995	24.4581
	0.523227	-0.33392	O15143;C9JEY1;C9K057;C9JBJ7;C9J4Z7;F8VXW2;C9JQM8;C9JFG9;C9J6C8;C9JTT6;C9JM51;F8WEB3	O15143;C9JEY1;C9K057;C9JBJ7;C9J4Z7;F8VXW2;C9JQM8;C9JFG9;C9J6C8	Actin-related protein 2/3 complex subunit 1B	ARPC1B	29.118	417330000	37	25.8595	25.2036	25.5346	24.9437	25.6086	25.0437
	1.17376	0.298091	O15144;C9JTV5;G5E9J0;H7C3F9;G5E9S7	O15144	Actin-related protein 2/3 complex subunit 2	ARPC2	130.76	6083700000	183	28.9815	29.1246	28.9751	29.3873	29.1132	29.4751
	0.913076	0.178949	O15145;C9JZD1;F8VR50	O15145	Actin-related protein 2/3 complex subunit 3	ARPC3	114.22	3527000000	96	28.4029	28.2534	28.2507	28.3363	28.5117	28.5958
	0.644459	0.379279	O15173;O15173-2;U3KQM0	O15173;O15173-2	Membrane-associated progesterone receptor component 2	PGRMC2	93.274	1867200000	72	27.584	26.8496	27.3686	27.7508	27.3471	27.8422
	0.327206	0.0679932	O15212;A2AB88	O15212;A2AB88	Prefoldin subunit 6	PFDN6	66.043	1919400000	60	27.4584	27.4926	27.544	27.6619	27.4036	27.6335
	0.197593	-0.247723	O15217;O15217-2;Q5JW88	O15217;O15217-2	Glutathione S-transferase A4	GSTA4	24.761	550020000	37	25.912	26.3356	25.6552	25.8933	26.3793	24.887
	0.25728	-0.210908	Q5T8U5;O15260-2;O15260;O15260-3;B7Z1G8	Q5T8U5;O15260-2;O15260;O15260-3	Surfeit locus protein 4	SURF4	150.81	2386400000	39	28.5801	27.5342	27.9935	27.6387	27.7837	28.0526
	0.397723	0.642459	O15294;O15294-3;O15294-2;O15294-4;C9JZL3	O15294;O15294-3;O15294-2;O15294-4	UDP-N-acetylglucosamine--peptide N-acetylglucosaminyltransferase 110 kDa subunit	OGT	27.726	287760000	57	22.9801	25.1123	24.6223	24.5014	25.2818	24.8589
	0.386784	-0.297974	O15305-2;O15305;H3BR08;H3BM92;H3BV34;H3BT06;H3BNY9;H3BPH4;H3BRM0;H3BV55	O15305-2;O15305;H3BR08;H3BM92;H3BV34;H3BT06;H3BNY9;H3BPH4;H3BRM0;H3BV55	Phosphomannomutase 2;Phosphomannomutase	PMM2	10.974	140370000	18	24.2636	23.6566	24.7251	24.0972	23.8935	23.7608
	0.334639	-0.0467695	O15355	O15355	Protein phosphatase 1G	PPM1G	138.42	911720000	75	26.5087	26.6186	26.5307	26.5982	26.4742	26.4454
	0.171119	-0.0372162	O15371-3;O15371;O15371-2;B0QYA5;B0QYA6;B0QYA8;B0QYA4	O15371-3;O15371;O15371-2	Eukaryotic translation initiation factor 3 subunit D	EIF3D	182.7	1954200000	134	27.6312	27.4635	27.5802	27.426	27.6468	27.4904
	0.558727	0.146741	O15400-2;O15400	O15400-2;O15400	Syntaxin-7	STX7	176.2	1244600000	86	26.6898	26.884	26.7192	27.0222	26.9986	26.7124
	0.381105	-0.424014	O15460-2	O15460-2			139.23	3342800000	185	29.3116	28.0605	28.3579	28.1611	28.6267	27.6703
	0.183343	0.0883478	O15498;O15498-2	O15498;O15498-2	Synaptobrevin homolog YKT6	YKT6	47.634	1297900000	79	27.3002	27.0265	26.7812	26.9654	27.3257	27.0818
	0.0793288	-0.188177	O15511;B1ALC0;O15511-2	O15511;B1ALC0;O15511-2	Actin-related protein 2/3 complex subunit 5	ARPC5	13.779	910230000	25	26.1842	26.3597	26.276	26.7796	24.4226	27.0533
	0.255141	0.165888	O15523;O15523-2;O15523-3;C9J081;C9J8G5	O15523;O15523-2	ATP-dependent RNA helicase DDX3Y	DDX3Y	44.877	171520000	25	24.0318	24.0037	23.8906	23.7077	24.1264	24.5896
	0.0640983	0.0295404	O43143	O43143	Pre-mRNA-splicing factor ATP-dependent RNA helicase DHX15	DHX15	140.1	6511500000	329	28.9866	29.3156	29.4266	29.3751	29.0913	29.3511
	0.412216	-0.189419	O43148;O43148-2;K7EP06;K7ERH6	O43148;O43148-2;K7EP06	mRNA cap guanine-N7 methyltransferase	RNMT	18.508	291620000	28	25.1542	25.3209	24.676	24.8605	24.8123	24.9099
	0.133236	0.0834204	O43172-2;O43172	O43172-2;O43172	U4/U6 small nuclear ribonucleoprotein Prp4	PRPF4	27.164	331800000	57	24.563	24.9944	25.2968	24.9822	24.9148	25.2075
	1.03829	-1.99356	O43181;H0Y9M8	O43181	NADH dehydrogenase [ubiquinone] iron-sulfur protein 4, mitochondrial	NDUFS4	16.946	244980000	20	25.1082	25.1717	25.1625	24.8578	22.8129	21.791
	1.69202	0.363622	O43237;O43237-2;J3KRI4;B4E2E0;J3KRZ2;H3BUM4;J3KSD2	O43237;O43237-2	Cytoplasmic dynein 1 light intermediate chain 2	DYNC1LI2	222.76	1504300000	108	26.9199	27.1655	27.0016	27.4184	27.2684	27.4911
	0.261264	0.113173	O43242;O43242-2;H0YGV8;F5H8K4	O43242;O43242-2	26S proteasome non-ATPase regulatory subunit 3	PSMD3	141.1	5142400000	221	28.795	28.8191	28.8438	29.2761	28.7767	28.7446
	0.677374	-0.613235	O43251-6;O43251-8;I3L1D4;S4R469;F8VR27;F8VZY7;B0QYV1;B0QYY4;A0A087X2B1;A0A0G2JRA5;J3KNW3;B7Z1U7;F8VZG9;A0A286YEU2;O43251-9;Q9NWB1-3;O43251-4;O43251-5;O43251-10;O43251-2;O43251;Q9NWB1-4;Q9NWB1-5;Q9NWB1;O43251-7;Q9NWB1-2;A0A0G2JSB3;B0QYY7;A0A3B3ITL7;J3QQZ2;J3QRF4;A6NFN3;A6NFN3-2;B0QYY6;F8VRS4;O43251-3;A0A0G2JRD1;S4R3K7;F5H0M1	O43251-6;O43251-8;I3L1D4;S4R469;F8VR27;F8VZY7;B0QYV1;B0QYY4;A0A087X2B1;A0A0G2JRA5;J3KNW3;B7Z1U7;F8VZG9;A0A286YEU2;O43251-9;Q9NWB1-3;O43251-4;O43251-5;O43251-10;O43251-2;O43251;Q9NWB1-4;Q9NWB1-5;Q9NWB1;O43251-7;Q9NWB1-2;A0A0G2JSB3;B0QYY7;A0A3B3ITL7;J3QQZ2;J3QRF4;A6NFN3;A6NFN3-2	RNA binding protein fox-1 homolog 2;RNA binding protein fox-1 homolog;RNA binding protein fox-1 homolog 1;RNA binding protein fox-1 homolog 3	RBFOX2;RBFOX1;RBFOX3	10.849	125530000	23	24.112	23.9012	23.9584	23.115	24.1747	22.8421
	0.824992	-0.181301	O43252	O43252	Bifunctional 3-phosphoadenosine 5-phosphosulfate synthase 1;Sulfate adenylyltransferase;Adenylyl-sulfate kinase	PAPSS1	85.795	1436700000	123	27.3159	27.1554	27.0978	27.1321	27.0293	26.8637
	1.11372	-1.39108	O43264;O43264-2;F5H3C1	O43264;O43264-2	Centromere/kinetochore protein zw10 homolog	ZW10	16.01	146170000	19	24.3897	24.4578	24.6487	23.6559	23.7232	21.9438
	0.502981	0.241938	O43290;E9PQI8	O43290	U4/U6.U5 tri-snRNP-associated protein 1	SART1	73.353	458690000	76	25.076	25.5179	25.3798	25.666	25.2445	25.7891
	0.08876	-0.134909	O43295-2;O43295;O43295-3;A0A087WZH4	O43295-2;O43295;O43295-3	SLIT-ROBO Rho GTPase-activating protein 3	SRGAP3	61.419	456100000	73	24.5885	26.0204	25.8914	24.9988	25.9331	25.1637
	0.594366	-0.104781	O43324;D6RBD7;C9J1V9;O43324-2;H0YAL7;H0YAH9;D6RCQ0	O43324;D6RBD7;C9J1V9;O43324-2;H0YAL7	Eukaryotic translation elongation factor 1 epsilon-1	EEF1E1;EEF1E1-BLOC1S5	17.197	920030000	50	26.5766	26.5634	26.479	26.4883	26.5252	26.2912
	0.166024	0.164624	O43347	O43347	RNA-binding protein Musashi homolog 1	MSI1	98.459	2546800000	120	27.2354	28.2663	28.1989	28.3197	27.7436	28.1311
	0.2825	0.221206	O43390;O43390-3;B4DT28;A0A286YEZ8	O43390;O43390-3;B4DT28	Heterogeneous nuclear ribonucleoprotein R	HNRNPR	204.86	11931000000	330	29.4462	30.3249	30.2459	30.4003	29.941	30.3394
	0.578858	-0.174702	O43395;O43395-3	O43395	U4/U6 small nuclear ribonucleoprotein Prp3	PRPF3	35.832	270600000	47	24.6696	24.6219	24.8218	24.6663	24.2901	24.6328
	0.417997	0.140991	O43396;K7ER96;K7EML9;K7EPB7;K7EME7;K7EKG2	O43396;K7ER96	Thioredoxin-like protein 1	TXNL1	154.55	1470200000	103	27.0751	27.0752	26.9278	27.3758	26.9143	27.211
	0.685619	-0.272455	O43399;O43399-5;O43399-7;A0A087WYR3;A0A087WZ51	O43399;O43399-5;O43399-7;A0A087WYR3;A0A087WZ51	Tumor protein D54	TPD52L2	113.15	2210900000	109	28.1361	27.6444	27.819	27.8122	27.5001	27.4699
	0.0367111	0.0220712	O43447;C9JQD4;O43447-2;H0YEL5;A6NM32	O43447;C9JQD4;O43447-2;H0YEL5	Peptidyl-prolyl cis-trans isomerase H;Peptidyl-prolyl cis-trans isomerase	PPIH	39.97	399110000	53	25.0981	25.6278	25.5046	25.5311	25.182	25.5837
	1.32155	0.303595	O43488;H3BLU7;Q8NHP1;H7C5H7;Q8NHP1-3;O95154	O43488;H3BLU7	Aflatoxin B1 aldehyde reductase member 2	AKR7A2	68.387	3664200000	140	28.1474	28.3241	28.3713	28.5916	28.437	28.725
	0.499248	0.69591	O43504;R4GMU8;E9PLX3;A0A0C4DGV4	O43504;R4GMU8;E9PLX3;A0A0C4DGV4	Ragulator complex protein LAMTOR5	LAMTOR5	57.596	259210000	25	22.734	24.2176	24.7724	24.563	24.6283	24.6204
	0.780693	-0.327677	O43592;F8WDU6;F5GYW6	O43592	Exportin-T	XPOT	65.971	1347700000	127	27.4825	26.9931	27.0765	26.7204	27.0975	26.7512
	0.389394	0.170123	O43615;M0QXU7;M0R301;M0QXM9;M0R124	O43615;M0QXU7	Mitochondrial import inner membrane translocase subunit TIM44	TIMM44	21.858	476960000	58	25.409	25.2762	25.3718	25.37	25.8809	25.3165
	1.08851	-0.568978	O43617;A6NKE1;A0A087WWM0;O43617-2;A0A087WYS5	O43617;A6NKE1;A0A087WWM0;O43617-2	Trafficking protein particle complex subunit 3	TRAPPC3	9.2359	367200000	30	25.7329	25.3922	25.4714	24.6461	25.3938	24.8497
	0.0529773	-0.10434	O43660;O43660-2;D6RA26;B7Z982;H0YA24;H0YAA2	O43660;O43660-2;D6RA26	Pleiotropic regulator 1	PLRG1	42.234	190760000	38	22.7664	24.6193	24.6529	24.4421	23.6223	23.6612
	0.338521	-0.187717	O43681;A0A087WXS7;K7ERW9	O43681;A0A087WXS7	ATPase ASNA1	ASNA1	79.736	2093800000	136	27.45	27.9096	27.8935	27.3541	27.9059	27.4301
	0.691113	-0.149202	O43707;O43707-2;F5GXS2;O43707-3;H7C144;K7EP19	O43707;O43707-2;F5GXS2;O43707-3	Alpha-actinin-4	ACTN4	323.31	26512000000	613	31.5129	31.3088	31.3867	31.381	31.2688	31.1111
	0.228349	0.16611	O43719;Q5H919;Q5H918	O43719	HIV Tat-specific factor 1	HTATSF1	163.44	381770000	48	24.7343	25.3625	25.2554	25.2105	24.9643	25.6757
	0.82773	0.26586	O43747;O43747-2;H3BR36;H3BUN9;H3BNR4;H3BN75;H3BS13;H3BV30;H3BRM7;H3BN71;B4DGE1;B3KNW1;H3BNN2	O43747;O43747-2	AP-1 complex subunit gamma-1	AP1G1	96.497	1610800000	135	27.2909	26.9979	27.0038	27.4985	27.1385	27.4532
	0.794654	0.611621	O43765;K7EMD6;K7ERW5	O43765;K7EMD6	Small glutamine-rich tetratricopeptide repeat-containing protein alpha	SGTA	36.671	3422500000	108	27.5373	28.1146	28.088	28.7555	27.9269	28.8924
	0.632344	-0.220351	O43776;K7EJ19;K7EIU7;K7EQ35;O43776-2;K7EPK2;K7EMQ6	O43776	Asparagine--tRNA ligase, cytoplasmic	NARS	148.56	4095700000	192	28.4751	28.6981	28.9854	28.5153	28.5824	28.3999
	0.170715	-0.097875	O43809;H3BND3;H3BV41	O43809;H3BND3	Cleavage and polyadenylation specificity factor subunit 5	NUDT21	73.9	2461800000	66	27.8249	28.2083	27.8966	28.024	28.0951	27.5171
	0.711151	0.28409	O43813;E9PHS0;F8WDS9;H7C2E3	O43813;E9PHS0	LanC-like protein 1	LANCL1	40.027	1215700000	66	27.0106	26.6269	26.6617	27.1	26.7955	27.2559
	0.151384	-0.240025	O43815-2;O43815	O43815-2;O43815	Striatin	STRN	21.872	196880000	44	24.7781	24.6452	23.5879	23.3594	24.9311	24.0006
	1.0177	0.276632	O43852;O43852-3;O43852-6;O43852-15;O43852-10;O43852-5;H0Y875;O43852-9;O43852-13;O43852-14;O43852-11;O43852-12	O43852;O43852-3;O43852-6;O43852-15;O43852-10;O43852-5	Calumenin	CALU	323.31	20419000000	337	30.8221	30.574	30.8753	31.0407	30.8788	31.1818
	1.14819	0.288081	O43854-2;O43854	O43854-2;O43854	EGF-like repeat and discoidin I-like domain-containing protein 3	EDIL3	35.047	413150000	65	25.4716	25.2835	25.0873	25.5258	25.5318	25.6491
	0.859884	0.405127	O43865;O43865-2	O43865;O43865-2	Putative adenosylhomocysteinase 2	AHCYL1	60.616	1362500000	98	26.4612	26.7605	26.9883	27.3914	27.1823	26.8516
	1.39905	-0.455348	O60216;E5RG18;E5RJW1;E5RJK5;E5RI01;E5RFZ5;E5RFV8;E5RIN7;Q9H4I0;A0A140T8W2;Q9H4I0-2	O60216	Double-strand-break repair protein rad21 homolog	RAD21	16.448	399250000	60	25.5124	25.5183	25.3115	24.8111	25.2576	24.9075
	1.1693	0.749245	O60218	O60218	Aldo-keto reductase family 1 member B10	AKR1B10	24.798	278680000	37	24.504	23.8146	24.2816	24.5353	25.2976	25.0151
	0.0595284	0.0158621	O60256;O60256-2;O60256-4;O60256-3;E7EPA1;I3L0S1;C9JJS3;C9K0K7;C9JDU5;C9JDH0;I3L4G9;E7EW35;I3L331;I3L164;I3L1T1;I3L3B8;I3L2J4	O60256;O60256-2;O60256-4;O60256-3;E7EPA1;I3L0S1;C9JJS3;C9K0K7	Phosphoribosyl pyrophosphate synthase-associated protein 2	PRPSAP2	106.97	2155400000	143	27.5972	27.7347	27.5731	27.7823	27.6559	27.5144
	0.849583	0.681726	O60262;K7ESC6	O60262	Guanine nucleotide-binding protein G(I)/G(S)/G(O) subunit gamma-7	GNG7	7.1804	124710000	20	23.6931	23.4063	22.5369	24.0323	23.6248	24.0244
	0.617418	-0.385998	O60264;A0A0A0MRP6;B7ZLQ5;P28370-2;P28370	O60264	SWI/SNF-related matrix-associated actin-dependent regulator of chromatin subfamily A member 5	SMARCA5	122.19	605570000	81	25.7638	26.2303	26.109	26.1303	25.3455	25.4692
	1.79632	1.1259	O60282;A0A0G2JMZ6;O60282-2;C9JWB9	O60282;A0A0G2JMZ6;O60282-2	Kinesin heavy chain isoform 5C	KIF5C	323.31	3268000000	274	27.1755	27.8854	27.7948	28.8964	28.4043	28.9327
	0.992368	-1.04624	O60306;H0YH15	O60306	Intron-binding protein aquarius	AQR	14.491	102030000	28	23.683	24.2903	24.1348	22.7052	22.3751	23.8891
	1.7814	0.420192	O60313;O60313-2;A0A2R8YE78;C9JMB8;O60313-11;O60313-10;A0A2R8Y3X5;A0A2R8YDM2;E5KLJ9;O60313-13;O60313-9;A0A2R8YGE5;A0A2R8YD53;A0A2R8YFD1;A0A2R8Y4Q3;A0A2R8Y4G4;A0A2R8YE54;H7C141;A0A2R8Y5G3;C9JY58;H7C321;H7C3G2;A8MXB6;A0A2R8Y5E2	O60313;O60313-2;A0A2R8YE78;C9JMB8;O60313-11;O60313-10;A0A2R8Y3X5;A0A2R8YDM2;E5KLJ9;O60313-13;O60313-9;A0A2R8YGE5;A0A2R8YD53;A0A2R8YFD1;A0A2R8Y4Q3;A0A2R8Y4G4	Dynamin-like 120 kDa protein, mitochondrial;Dynamin-like 120 kDa protein, form S1	OPA1	116.2	1482200000	144	26.7401	26.8229	26.9128	27.4114	27.2365	27.0884
	0.614087	-0.152086	O60341;R4GMQ1;O60341-2;R4GMP9	O60341;R4GMQ1;O60341-2	Lysine-specific histone demethylase 1A	KDM1A	156.05	1665700000	160	27.3142	27.3484	27.4926	27.3593	27.2969	27.0427
	0.350719	-0.555213	O60427;A0A0A0MR51;H0YB97;H7C2V0;O60427-2;F5H8G5;F5H3P6;F5H852;F5GWE3;F5H3U5	O60427;A0A0A0MR51	Fatty acid desaturase 1	FADS1	54.935	250730000	26	25.0819	24.7272	24.7685	25.2728	24.5647	23.0745
	0.151522	-0.264046	O60443;C9JSR4;O60443-3;O60443-2;H7BZJ0;H7C147	O60443;C9JSR4;O60443-3	Non-syndromic hearing impairment protein 5	DFNA5	21.018	105890000	31	24.3198	23.5926	23.7923	22.9622	24.8613	23.0891
	0.486284	0.431805	O60488-2;O60488;D6RFW9;D6RDA8;D6RD96;D6RF95	O60488-2;O60488	Long-chain-fatty-acid--CoA ligase 4	ACSL4	13.643	145620000	35	23.5045	23.6419	23.4751	24.4463	24.2563	23.2142
	0.328511	0.107873	O60502;O60502-4;O60502-2;O60502-3;H7C3X0	O60502;O60502-4;O60502-2;O60502-3	Protein O-GlcNAcase	MGEA5	158.97	2192200000	168	27.7839	27.9188	27.6957	27.6968	28.1069	27.9183
	0.469965	0.488189	O60518;A0A096LPA6;A0A096LNS2	O60518	Ran-binding protein 6	RANBP6	11.187	99513000	23	22.0845	23.4205	23.2949	23.688	23.1902	23.3863
	0.106338	-0.0937074	O60568;H7C2V1;H7C0B8;C9JIX5;C9JU11;H7C2S8	O60568;H7C2V1	Procollagen-lysine,2-oxoglutarate 5-dioxygenase 3	PLOD3	21.916	250660000	47	24.538	24.1377	25.1708	24.727	24.4357	24.4028
	0.844873	-0.256832	O60664-4;O60664;O60664-3;K7ERZ3;O60664-2;K7EL96;K7ER39	O60664-4;O60664;O60664-3;K7ERZ3;O60664-2	Perilipin-3	PLIN3	258.07	5863600000	263	29.3049	29.1883	29.3742	29.2594	29.0295	28.8081
	0.462788	-0.715172	O60684;Q5TFJ7;S4R3E5	O60684;Q5TFJ7	Importin subunit alpha-7	KPNA6	27.636	287320000	31	24.7877	24.5675	24.9139	25.2994	23.066	23.7582
	0.728029	-0.358744	O60701;O60701-2;O60701-3;E7ER83;E7ETF4;E7EV97;E7ER95;D6RHF4;E9PBD2	O60701;O60701-2;O60701-3	UDP-glucose 6-dehydrogenase	UGDH	323.31	7826800000	307	30.1435	29.5472	29.7623	29.2687	29.7396	29.3684
	0.0704544	-0.0309429	O60739	O60739	Eukaryotic translation initiation factor 1b	EIF1B	50.568	645470000	45	26.1886	25.8134	25.984	25.9423	26.163	25.7879
	0.601284	-0.161447	O60749;O60749-2;D6RC15	O60749;O60749-2	Sorting nexin-2	SNX2	106.1	2564200000	145	28.1023	28.0048	28.1783	28.11	27.9571	27.7338
	1.2069	0.264193	O60763;O60763-2;REV__R4GMN2	O60763;O60763-2	General vesicular transport factor p115	USO1	323.31	5025800000	345	28.9256	28.6507	28.7529	29.0905	28.9128	29.1185
	0.242387	-0.148739	O60784;O60784-2;O60784-4;B0QY01;O60784-3;Q6UW50;V9GYF4;B0QY02;V9GZ68;H7BYN7;F8WAW7;F8WE29;F8WBB0;F8WB30	O60784;O60784-2;O60784-4;B0QY01;O60784-3;Q6UW50	Target of Myb protein 1	TOM1	44.066	604670000	66	26.3123	25.9789	25.4792	25.7692	25.7704	25.7846
	0.504187	-0.2454	O60831;A6NM71;A6NP52	O60831;A6NM71	PRA1 family protein 2	PRAF2	25.535	933500000	44	26.7802	26.7301	26.3255	26.0667	26.5962	26.4367
	0.639917	-0.357333	O60832;C9IYT0;O60832-2;H7C0M1;H7BZF2;H7C2Q9	O60832;C9IYT0;O60832-2;H7C0M1	H/ACA ribonucleoprotein complex subunit 4	DKC1	19.984	157620000	33	24.1133	24.3422	24.1511	23.4732	23.7627	24.2987
	0.161102	0.118101	O60869-2;O60869-3;O60869	O60869-2;O60869-3;O60869	Endothelial differentiation-related factor 1	EDF1	15.718	1229300000	57	26.7491	26.8404	26.8928	26.9976	26.4503	27.3887
	0.976488	0.123014	O60884;A0A087WT48;I3L320	O60884	DnaJ homolog subfamily A member 2	DNAJA2	123.07	2598100000	155	27.9104	27.8422	27.9059	27.9461	27.9631	28.1183
	0.0864506	-0.035916	O60888-3;O60888;O60888-2;C9IZG4;C9IZQ5	O60888-3;O60888;O60888-2;C9IZG4	Protein CutA	CUTA	79.932	3537800000	64	28.4595	28.5634	28.4352	28.1662	28.6024	28.5816
	0.191953	0.109541	O60925;E5RGS4;D6RGG5	O60925;E5RGS4	Prefoldin subunit 1	PFDN1	65.17	1619300000	59	27.2344	27.293	27.483	27.776	27.4939	27.0692
	0.996917	0.721845	O75027;O75027-2;B4DGL8;A0A087WW65;O75027-3;A0A2R8Y473;E9PJR8;A0A2R8Y3N2;E9PNQ5	O75027;O75027-2;B4DGL8;A0A087WW65;O75027-3;A0A2R8Y473	ATP-binding cassette sub-family B member 7, mitochondrial	ABCB7	9.2492	341240000	13	22.0783	22.9172	22.9432	23.3885	23.6797	23.0359
	1.13303	1.59033	O75054;O75054-2	O75054;O75054-2	Immunoglobulin superfamily member 3	IGSF3	30.908	251560000	60	23.0658	24.6561	22.6947	25.028	24.61	25.5496
	1.38697	-0.367467	O75083;O75083-3;D6RD66	O75083;O75083-3	WD repeat-containing protein 1	WDR1	218.26	6028600000	263	29.3551	29.2903	29.3002	28.7469	29.168	28.9284
	0.15058	0.193535	O75094-2;O75094-3;O75094;O75094-4;A0A0A0MSC8	O75094-2;O75094-3;O75094;O75094-4;A0A0A0MSC8	Slit homolog 3 protein	SLIT3	32.343	240280000	39	24.7429	23.5621	24.7764	24.0363	24.7141	24.9116
	1.37289	0.48285	O75116;E9PF63;Q14DU5;D6REE7;C9JFJ0	O75116;E9PF63;Q14DU5	Rho-associated protein kinase 2	ROCK2	35.467	396140000	72	24.9642	25.1925	24.9788	25.82	25.4068	25.3572
	0.156745	0.123377	O75131;A0A087WYQ3;E5RHZ0;H0YB26;A0A087WXR6;A0A087WUS8;E5RFT7;E7ENV7;Q86YQ8-2;Q9HCH3-2;Q8IYJ1;Q96A23;O95741;Q9UBL6-2;Q86YQ8;Q96A23-2;Q9HCH3;O95741-2;Q9UBL6	O75131;A0A087WYQ3	Copine-3	CPNE3	43.932	1680500000	92	27.0923	27.0715	27.2254	27.7856	27.1894	26.7843
	0.907138	-1.32141	O75165;A0A3B3IRM0;H0YA63	O75165	DnaJ homolog subfamily C member 13	DNAJC13	30.275	156620000	47	25.0793	23.7773	24.5491	22.3959	24.2539	22.7917
	0.351786	0.126399	O75223;B8ZZK2;M0QZK8;O75223-2;O75223-4;H7BZK5;O75223-3;A0A0B4J1Y4	O75223;B8ZZK2;M0QZK8;O75223-2;O75223-4	Gamma-glutamylcyclotransferase	GGCT	62.672	1446400000	61	27.0134	27.0964	27.0256	27.0676	26.9852	27.4617
	1.27061	-0.593116	O75306-2;O75306	O75306-2;O75306	NADH dehydrogenase [ubiquinone] iron-sulfur protein 2, mitochondrial	NDUFS2	48.524	753360000	61	26.0409	26.5793	26.3096	25.9644	25.7526	25.4335
	0.659058	0.173576	O75323;H7C333;C9K068;O75323-2;C9J7B1;F8WBI5	O75323;H7C333;C9K068;O75323-2	Protein NipSnap homolog 2	GBAS	43.553	740200000	44	25.8507	26.1069	26.102	26.1061	26.1127	26.3616
	0.0571787	0.015063	O75340;O75340-2;A0A024QZ42;H0Y9X3;A0A087WZ38;E7EPW6;O75340-3;D6RA21;Q86W51	O75340;O75340-2;A0A024QZ42	Programmed cell death protein 6	PDCD6	69.731	1555600000	59	27.152	27.4086	27.1721	27.2387	27.2048	27.3343
	0.574715	0.401363	O75348;O95670-2	O75348	V-type proton ATPase subunit G 1	ATP6V1G1	37.564	525220000	28	25.5602	25.1529	25.7108	25.8663	25.4263	26.3353
	0.0558432	0.0381381	O75351;K7EL71;K7EKZ3	O75351	Vacuolar protein sorting-associated protein 4B	VPS4B	24.649	498600000	32	25.2592	25.9023	25.7367	25.6962	25.4242	25.8922
	0.295476	0.172991	O75367-2;O75367-3;O75367;B4DJC3;D6RCF2	O75367-2;O75367-3;O75367;B4DJC3	Core histone macro-H2A.1;Histone H2A	H2AFY	39.208	1044000000	76	26.1288	26.6852	26.575	26.911	26.3391	26.6578
	0.823523	-0.327459	O75368	O75368	SH3 domain-binding glutamic acid-rich-like protein	SH3BGRL	25.082	1452600000	58	27.2575	27.3943	27.4892	27.3711	27.0048	26.7828
	1.05835	-0.334333	O75369-2;O75369-9;O75369;O75369-8;O75369-6;O75369-3;E7EN95;O75369-7;O75369-5;O75369-4;A0A0A0MT44;H7C5L4;A0A0C4DGA1	O75369-2;O75369-9;O75369;O75369-8;O75369-6;O75369-3;E7EN95;O75369-7;O75369-5;O75369-4	Filamin-B	FLNB	323.31	16502000000	938	31.1101	30.6003	30.7989	30.5013	30.5108	30.4942
	0.657711	-0.327354	O75396;A0A087X1A9	O75396	Vesicle-trafficking protein SEC22b	SEC22B	51.973	2948900000	75	28.4903	28.3687	28.1554	27.7725	28.4145	27.8452
	0.226242	0.19364	O75400-2;O75400;O75400-3;F5H578;H0YG38;H7C2N3	O75400-2;O75400;O75400-3;F5H578	Pre-mRNA-processing factor 40 homolog A	PRPF40A	42.675	955270000	78	25.6982	26.6837	26.5331	26.6164	26.23	26.6495
	2.09126	0.508462	O75431;C9JAZ1;O75431-2;C9JNK6;F8WE26	O75431;C9JAZ1;O75431-2;C9JNK6	Metaxin-2	MTX2	104.69	749730000	42	25.8212	26.0211	26.1366	26.4593	26.4473	26.5976
	1.49734	-0.636014	O75436;S4R3Q6;O75436-2;S4R2Y3	O75436;S4R3Q6;O75436-2	Vacuolar protein sorting-associated protein 26A	VPS26A	110.79	883470000	80	27.1361	26.7074	26.5681	26.0362	26.3574	26.11
	1.05051	-0.412778	O75439;G3V0E4;F8WAZ6;F8WEA6;F8WBE1	O75439;G3V0E4	Mitochondrial-processing peptidase subunit beta	PMPCB	33.136	477050000	61	26.0508	25.9057	25.5905	25.4135	25.6632	25.2321
	0.804873	-0.0935338	O75475;O75475-3;O75475-2;H3BPQ6	O75475;O75475-3;O75475-2	PC4 and SFRS1-interacting protein	PSIP1	40.418	1528400000	90	27.2551	27.4368	27.3338	27.2703	27.2372	27.2377
	0.241246	-0.197717	O75477;B0QZ43	O75477;B0QZ43	Erlin-1	ERLIN1	22.733	575290000	49	25.45	25.8686	26.2545	26.0713	25.611	25.2975
	0.683061	1.47322	O75487;O75487-2	O75487;O75487-2	Glypican-4;Secreted glypican-4	GPC4	47.687	421190000	48	22.2219	25.0307	24.8052	25.8703	24.7182	25.889
	1.45735	-0.439545	O75489;E9PS48;O75489-2	O75489	NADH dehydrogenase [ubiquinone] iron-sulfur protein 3, mitochondrial	NDUFS3	43.318	550810000	47	26.2789	26.0157	25.852	25.6532	25.6923	25.4825
	0.014565	-0.0172704	Q5JRI1;O75494-5;O75494-4;O75494-6;O75494-3;O75494-2;O75494;Q6IQ42	Q5JRI1;O75494-5;O75494-4;O75494-6;O75494-3;O75494-2;O75494	Serine/arginine-rich splicing factor 10	SRSF10	9.9745	654020000	41	25.2135	26.3715	26.3875	26.0037	25.8666	26.0503
	0.84917	0.416196	O75506	O75506	Heat shock factor-binding protein 1	HSBP1	176.74	2259600000	89	27.3365	27.3071	27.7735	27.5795	27.9182	28.1681
	0.988553	1.03398	O75525-2;O75525;E5RG12;E5RJZ9;E5RHD3;H0YAQ1;H0YAQ3	O75525-2;O75525;E5RG12;E5RJZ9	KH domain-containing, RNA-binding, signal transduction-associated protein 3	KHDRBS3	4.425	121390000	15	23.8353	22.6252	22.7274	24.6637	23.6402	23.986
	0.830202	-0.7941	O75531;E9PJJ8	O75531	Barrier-to-autointegration factor;Barrier-to-autointegration factor, N-terminally processed	BANF1	48.236	3841600000	104	28.5225	29.2085	28.8943	28.0267	28.7936	27.4227
	0.89765	-0.24198	O75533;H7C341;B4DGZ4;O75533-2	O75533	Splicing factor 3B subunit 1	SF3B1	323.31	5575400000	338	28.9896	29.422	29.246	28.9911	28.9715	28.9691
	0.0373894	0.0307477	O75534-2;O75534;O75534-3;O75534-4;E9PLT0;E9PNG3;E9PJK7;E9PLD4	O75534-2;O75534;O75534-3;O75534-4;E9PLT0	Cold shock domain-containing protein E1	CSDE1	54.767	652800000	92	26.1009	25.6955	26.0395	26.3396	26.0882	25.5003
	0.214562	-0.20898	O75569;O75569-3;O75569-2;G5E9Q4;F8WEG8;C9JMM3	O75569;O75569-3;O75569-2;G5E9Q4	Interferon-inducible double-stranded RNA-dependent protein kinase activator A	PRKRA	32.046	428580000	25	25.2138	25.764	25.7206	25.6524	24.6894	25.7297
	0.516958	0.297451	O75608;O75608-2;A0A087X1K9;B4DP64;E5RGR0;E5RJ48;E5RI35	O75608;O75608-2;A0A087X1K9;B4DP64;E5RGR0;E5RJ48	Acyl-protein thioesterase 1	LYPLA1	65.339	1105400000	56	26.2006	26.7321	26.9999	26.7899	27.1098	26.9252
	0.325951	-0.102516	O75643;O75643-2;B4E0P5	O75643	U5 small nuclear ribonucleoprotein 200 kDa helicase	SNRNP200	323.31	8015800000	497	29.4158	29.8504	29.6765	29.6002	29.5189	29.5161
	3.12783	0.386899	O75663;O75663-2	O75663;O75663-2	TIP41-like protein	TIPRL	77.866	2665600000	96	27.8761	27.8304	27.7482	28.2221	28.2247	28.1687
	0.705616	0.636417	O75688;B8ZZF0;C9JIR6;A0A3B3IS24;O75688-4;O75688-3;O75688-5	O75688;B8ZZF0;C9JIR6;A0A3B3IS24;O75688-4;O75688-3;O75688-5	Protein phosphatase 1B	PPM1B	26.046	380180000	31	24.4274	24.8703	24.8705	26.0425	25.3218	24.7132
	0.288133	-0.402554	O75695	O75695	Protein XRP2	RP2	9.0189	275700000	27	24.0495	24.9765	24.843	25.16	23.5451	23.9563
	1.04298	-0.462144	O75718;C9JP16	O75718;C9JP16	Cartilage-associated protein	CRTAP	29.861	974190000	62	27.1096	26.464	26.7526	26.289	26.4834	26.1674
	0.590549	-0.978032	O75746;O75746-2;F8W9J0;H0YFB2;B4DGK6	O75746;O75746-2	Calcium-binding mitochondrial carrier protein Aralar1	SLC25A12	33.734	274840000	53	24.9786	24.9865	24.8571	24.7682	22.4875	24.6324
	0.811648	0.52271	O75781;O75781-2;A0A087WTK8;A0A087WWY4	O75781;O75781-2	Paralemmin-1	PALM	210.37	1788400000	103	26.9213	27.4015	27.1417	27.796	27.1732	28.0634
	0.442444	-0.408971	O75821;K7EL20;K7ENA8;K7ER90;K7EL60;K7EP16;K7ENH0	O75821;K7EL20;K7ENA8;K7ER90	Eukaryotic translation initiation factor 3 subunit G	EIF3G	156.28	1286400000	114	27.3751	26.8053	26.9893	27.11	26.8935	25.9393
	1.00774	0.382171	O75822;O75822-3;O75822-2;H0YLP3;H0YGJ7	O75822;O75822-3;O75822-2;H0YLP3	Eukaryotic translation initiation factor 3 subunit J	EIF3J	78.709	1580900000	101	27.0626	26.9874	27.0984	27.6093	27.0818	27.6038
	0.159291	-0.0930468	O75844	O75844	CAAX prenyl protease 1 homolog	ZMPSTE24	29.07	551450000	62	25.858	25.7962	25.4544	25.3782	25.9635	25.4878
	0.433937	-0.181223	O75874;C9J4N6;C9JJE5;C9JLU6	O75874	Isocitrate dehydrogenase [NADP] cytoplasmic	IDH1	323.31	25074000000	369	31.6461	31.3094	31.1997	31.0166	31.4221	31.1727
	0.545497	-0.688719	O75880;J3QL56	O75880;J3QL56	Protein SCO1 homolog, mitochondrial	SCO1	29.37	253500000	25	25.0048	25.4357	24.7604	25.2331	23.4315	24.4701
	0.394703	0.222548	O75884;O75884-2	O75884;O75884-2	Putative hydrolase RBBP9	RBBP9	77.862	334960000	37	25.3014	24.9239	24.9583	25.586	24.8916	25.3737
	0.724649	-0.574761	O75886;O75886-2	O75886;O75886-2	Signal transducing adapter molecule 2	STAM2	11.009	152030000	27	24.1349	24.0303	23.8859	22.8372	24.069	23.4206
	0.0374764	-0.0424817	O75915;F8WF90;C9JQU6;F8WF33	O75915	PRA1 family protein 3	ARL6IP5	46.318	1535700000	51	27.8248	26.8242	27.3207	26.9141	27.1605	27.7677
	0.191425	-0.17899	O75934	O75934	Pre-mRNA-splicing factor SPF27	BCAS2	55.636	536630000	46	25.4294	25.8415	25.7967	26.1217	25.4354	24.9735
	0.573839	1.56031	O75935-3;O75935;X6RCK5;X6RLR1;X6RA56;A0A0A0MRV8;O75935-2	O75935-3;O75935;X6RCK5;X6RLR1;X6RA56;A0A0A0MRV8;O75935-2	Dynactin subunit 3	DCTN3	25.888	794430000	48	26.3075	22.6267	26.1333	26.9108	26.4372	26.4005
	0.503605	0.109144	O75937;S4R3J5	O75937	DnaJ homolog subfamily C member 8	DNAJC8	66.976	2179700000	83	27.5128	27.7123	27.6829	27.8704	27.6227	27.7423
	0.178802	0.300514	O75940	O75940	Survival of motor neuron-related-splicing factor 30	SMNDC1	31.502	275150000	39	23.2842	24.8369	25.2615	24.3868	25.1363	24.761
	0.471992	0.109834	O75947;O75947-2;F5H608	O75947;O75947-2	ATP synthase subunit d, mitochondrial	ATP5H	155.57	4061800000	114	28.5553	28.4757	28.4184	28.7085	28.6608	28.4096
	1.09111	0.340265	O75955;A0A140T9R1;O75955-2;A2AB10;A0A140T9X0;A2AB09;A2AB12;A0A140T959;A2AB13;A0A140T9W4;A0A0G2JJQ6;A2AB11;A0A140T9C3;A0A140T9B1;A0A140T957;A0A140T910;A0A140T974;A0A140T907;A0A140T905;A2ABJ5	O75955;A0A140T9R1;O75955-2;A2AB10;A0A140T9X0;A2AB09;A2AB12	Flotillin-1	FLOT1	214.49	2004200000	157	27.1348	27.4154	27.4665	27.7888	27.4708	27.7779
	0.353884	-0.0448157	O76003	O76003	Glutaredoxin-3	GLRX3	153.33	2602600000	125	27.9885	28.024	27.9022	27.8872	27.8897	28.0033
	0.857164	0.354196	O76070;F8W754	O76070	Gamma-synuclein	SNCG	85.273	863910000	48	26.2999	26.1427	26.6611	26.5126	26.7427	26.911
	1.45098	0.394545	O76094;O76094-2;D6RDY6;R4GNC1	O76094;O76094-2;D6RDY6	Signal recognition particle subunit SRP72	SRP72	192.49	2100200000	142	27.4006	27.333	27.5141	27.9258	27.581	27.9246
	0.890594	0.0933628	O94760;B4DYP1;O94760-2	O94760;B4DYP1;O94760-2	N(G),N(G)-dimethylarginine dimethylaminohydrolase 1	DDAH1	85.491	3259800000	172	28.1715	28.1849	28.0948	28.1731	28.2465	28.3116
	0.600378	-0.326814	O94763-3;O94763;O94763-2;O94763-4;I3L2V7;I3L104;I3NI51;I3L280	O94763-3;O94763;O94763-2;O94763-4	Unconventional prefoldin RPB5 interactor 1	URI1	10.274	87489000	17	23.5596	23.9314	23.9244	23.1508	23.413	23.8712
	1.0363	-0.433699	O94776;O94776-2	O94776;O94776-2	Metastasis-associated protein MTA2	MTA2	42.387	499260000	76	25.9025	25.7364	25.7911	25.3592	25.7143	25.0554
	0.120612	0.348584	O94811	O94811	Tubulin polymerization-promoting protein	TPPP	27.843	295430000	31	23.2479	25.1725	23.6629	25.494	22.6463	24.9888
	0.241228	0.272526	X6R3P0;O94813-3;O94813-2;O94813;A0A087WYV5;E9PCX4;H0Y9Z6;F5H0U4	X6R3P0;O94813-3;O94813-2;O94813;A0A087WYV5	Slit homolog 2 protein;Slit homolog 2 protein N-product;Slit homolog 2 protein C-product	SLIT2	36.288	524990000	86	25.9966	24.6962	25.6212	25.2949	26.0525	25.7842
	0.666092	0.72182	O94819	O94819	Kelch repeat and BTB domain-containing protein 11	KBTBD11	25.874	227560000	44	23.0184	24.5151	24.4525	24.6578	24.8162	24.6775
	2.00287	0.30028	O94826	O94826	Mitochondrial import receptor subunit TOM70	TOMM70A	136.43	2482900000	166	27.635	27.8077	27.7029	28.0584	27.9326	28.0553
	0.840734	-0.821182	O94855;O94855-2;E9PDM8;E9PC44	O94855;O94855-2;E9PDM8;E9PC44	Protein transport protein Sec24D	SEC24D	110.73	945500000	83	27.3906	26.4995	26.7727	25.6996	26.804	25.6955
	0.186093	-0.0415834	O94874;O94874-2;O94874-3	O94874;O94874-2;O94874-3	E3 UFM1-protein ligase 1	UFL1	83.329	1261000000	131	27.1457	26.9489	27.0667	27.1306	26.9918	26.9141
	0.230076	-0.0868587	O94888;C9JAT7;C9JD50;H7BYF4	O94888;C9JAT7	UBX domain-containing protein 7	UBXN7	124.73	578550000	64	25.7122	25.9822	26.0892	25.6604	25.9903	25.8723
	0.6013	0.157914	O94903;E5RFX7;E5RG77;H0YBG2;E5RFZ4	O94903;E5RFX7;E5RG77	Proline synthase co-transcribed bacterial homolog protein	PROSC	55.2	1439500000	88	26.8723	27.2252	27.0667	27.319	27.2015	27.1174
	0.0576618	-0.0239436	O94906;O94906-2	O94906;O94906-2	Pre-mRNA-processing factor 6	PRPF6	83.73	765240000	105	26.2842	26.2097	26.3632	26.4009	25.9886	26.3958
	0.0641131	-0.0720959	O94925-3;B8ZZA8;B8ZZC5	O94925-3			69.656	571400000	72	26.0748	25.5054	25.4752	24.9351	25.9347	25.9693
	0.593788	0.186052	O94973;O94973-2;A0A0G2JS82;O94973-3;A0A0G2JQM1;E9PR62;A0A0G2JRF9;A0A0G2JQA4;A0A0G2JRS3;A0A0G2JQT9;H0YEG0;E9PQP4;E9PNC4;A0A0G2JS17;H0YDE9;M0R2D9;E9PPZ3;E9PS94;E9PPY8	O94973;O94973-2;A0A0G2JS82;O94973-3;A0A0G2JQM1	AP-2 complex subunit alpha-2	AP2A2	231.59	4758800000	265	28.8109	28.6314	28.7967	28.699	29.1387	28.9595
	0.195513	-0.250644	O94985-2;O94985;Q5SR54;A0A3B3ITY6	O94985-2;O94985;Q5SR54	Calsyntenin-1;Soluble Alc-alpha;CTF1-alpha	CLSTN1	24.047	248680000	31	24.1126	25.0476	24.9039	23.6598	24.9687	24.6837
	1.06933	-0.60991	O94992	O94992	Protein HEXIM1	HEXIM1	17.34	119050000	26	24.0327	23.6846	24.1822	23.5942	23.5665	22.9091
	0.0121636	0.00602976	O95104;O95104-2;O95104-3	O95104;O95104-2;O95104-3	Splicing factor, arginine/serine-rich 15	SCAF4	21.788	356390000	35	24.9226	25.3526	25.0491	25.1937	25.2381	24.9106
	0.359829	0.560923	O95140;O95140-2	O95140;O95140-2	Mitofusin-2	MFN2	11.383	98593000	37	23.7888	21.7639	23.4725	23.4459	23.8931	23.369
	1.12759	0.67599	O95197-3;B7Z4M1;O95197-6;O95197-5;O95197-4;O95197-7;O95197-2;O95197;F5H891;F5GWG7;F5H617	O95197-3;B7Z4M1;O95197-6;O95197-5;O95197-4;O95197-7;O95197-2;O95197	Reticulon-3;Reticulon	RTN3	93.129	3034100000	58	27.7498	27.9101	27.9772	28.8157	28.0077	28.8416
	0.938138	0.280504	O95202;O95202-2;O95202-3	O95202	LETM1 and EF-hand domain-containing protein 1, mitochondrial	LETM1	74.981	1303500000	97	26.6862	26.9159	26.7133	27.1287	27.2104	26.8179
	2.10652	0.596591	O95218-2;O95218	O95218-2;O95218	Zinc finger Ran-binding domain-containing protein 2	ZRANB2	79.323	554020000	45	25.3975	25.4995	25.4872	26.1695	25.8252	26.1793
	2.45884	-0.468452	O95219;O95219-2;F8W9T3;F8WDD4	O95219;O95219-2	Sorting nexin-4	SNX4	27.34	198600000	47	24.4432	24.4192	24.3514	23.9835	23.7973	24.0278
	1.10253	0.329924	O95292;E5RK64;O95292-2	O95292	Vesicle-associated membrane protein-associated protein B/C	VAPB	34.282	2131400000	88	27.5362	27.4869	27.4904	27.8952	27.5677	28.0405
	0.98843	-2.32536	O95302;O95302-3;O95302-2;Q75LS8;C9J4P8	O95302;O95302-3;O95302-2	Peptidyl-prolyl cis-trans isomerase FKBP9	FKBP9	20.768	432870000	27	26.8937	25.8725	25.9946	23.2118	26.0052	22.5678
	4.72238	0.342398	O95336;M0R261;M0R0U3;M0R1L2	O95336;M0R261;M0R0U3	6-phosphogluconolactonase	PGLS	108.93	5261400000	167	28.762	28.7642	28.7941	29.1343	29.1139	29.0994
	1.49433	-1.38249	O95352;O95352-3;O95352-2;C9JFF4;C9J415;C9JE55;C9JNU2;C9JKA3;C9JGL2;F8WDY9;H7C2R3;H7BZ92;H7C2J8;H7C369	O95352;O95352-3;O95352-2;C9JFF4;C9J415	Ubiquitin-like modifier-activating enzyme ATG7	ATG7	24.675	158740000	34	24.7196	24.3594	24.7927	24.0319	22.6792	23.0133
	0.768175	0.376727	O95372;Q5QPQ0;Q5QPQ1;Q5QPQ3;Q5QPQ2;Q5QPN9;Q5QPN5	O95372;Q5QPQ0;Q5QPQ1;Q5QPQ3;Q5QPQ2	Acyl-protein thioesterase 2	LYPLA2	34.503	849670000	81	26.1177	26.0446	26.3983	26.5883	26.2083	26.8941
	1.59106	-0.291052	O95373;E9PLJ0;E9PLB2	O95373	Importin-7	IPO7	200.83	2987200000	183	28.3087	28.2515	28.442	28.076	28.1303	27.9228
	0.767409	-0.136425	O95394;O95394-3;O95394-4;J3KN95;A0A087WT27;D6RCQ8;D6RIS6;D6RF77;H0Y8I3;H0Y987;D6RCD1;D6RC77	O95394;O95394-3;O95394-4;J3KN95;A0A087WT27	Phosphoacetylglucosamine mutase	PGM3	123.11	3500900000	190	28.6493	28.4306	28.5602	28.5135	28.3609	28.3564
	0.346752	-0.844425	O95425-4;O95425-3;O95425;O95425-2;A0A0J9YWY6	O95425-4;O95425-3;O95425;O95425-2;A0A0J9YWY6	Supervillin	SVIL	65.716	176000000	54	26.182	24.0017	23.1681	23.5183	24.4443	22.856
	0.237815	0.116158	O95433;O95433-2;G3V438;H0YJG7;H0YJU2;H0YJ63;G3V3W9	O95433;O95433-2;G3V438;H0YJG7	Activator of 90 kDa heat shock protein ATPase homolog 1	AHSA1	97.281	2974000000	170	28.0122	28.1196	28.0656	27.8132	28.4439	28.2888
	1.81557	-1.01119	O95456-2;O95456;F8WBH7	O95456-2;O95456	Proteasome assembly chaperone 1	PSMG1	11.536	188460000	18	25.0685	24.7999	24.8989	24.3788	23.6206	23.7343
	1.04226	0.39382	O95470;H0Y3V8;H7BXL7	O95470	Sphingosine-1-phosphate lyase 1	SGPL1	54.275	671870000	78	25.7668	25.7726	25.8259	26.269	25.8426	26.4352
	0.710051	-0.546136	R4GMU1;O95479	R4GMU1;O95479	GDH/6PGL endoplasmic bifunctional protein;Glucose 1-dehydrogenase;6-phosphogluconolactonase	H6PD	52.304	854570000	81	27.2656	26.3133	26.7242	26.4039	26.4725	25.7883
	0.54413	-0.48614	O95486;O95486-2	O95486	Protein transport protein Sec24A	SEC24A	19.16	162160000	38	24.69	24.1781	24.4194	23.3429	24.6064	23.8799
	0.811953	-0.243011	O95487-2;O95487;O95487-3	O95487-2;O95487;O95487-3	Protein transport protein Sec24B	SEC24B	24.854	200390000	41	24.5789	24.3242	24.2583	23.9507	24.2695	24.2122
	0.478128	-0.416278	O95573;F5H062;F5GWH2;C9JC11	O95573	Long-chain-fatty-acid--CoA ligase 3	ACSL3	95.531	639600000	79	26.404	26.0337	25.9474	26.083	26.0428	25.0103
	0.237582	-0.152576	O95671-2;O95671;O95671-3	O95671-2;O95671;O95671-3	N-acetylserotonin O-methyltransferase-like protein	ASMTL	26.805	245450000	39	24.8685	24.882	24.4742	24.9424	24.6229	24.2017
	0.285162	-0.864713	O95674	O95674	Phosphatidate cytidylyltransferase 2	CDS2	39.688	517040000	26	23.8897	23.2082	25.0148	21.4835	25.2486	22.7864
	0.675476	1.38933	O95716	O95716	Ras-related protein Rab-3D	RAB3D	5.7564	274590000	12	24.7913	24.6876	22.039	25.6835	25.1709	24.8316
	0.0753125	0.101482	O95721;C9JAF7	O95721;C9JAF7	Synaptosomal-associated protein 29;Synaptosomal-associated protein	SNAP29	11.419	186110000	28	23.9059	23.5235	23.7855	23.0135	23.9029	24.6029
	0.26355	-0.172384	O95747;C9JIG9;F8WBK9	O95747;C9JIG9	Serine/threonine-protein kinase OSR1	OXSR1	73.28	1547100000	91	27.2727	27.5589	27.2402	26.8407	27.6482	27.0657
	0.620989	1.67481	O95757;E9PDE8;D6RJ96	O95757;E9PDE8;D6RJ96	Heat shock 70 kDa protein 4L	HSPA4L	89.396	1201300000	137	23.1287	26.7268	26.7676	26.9986	27.2233	27.4257
	2.31261	-0.550982	O95777;F2Z2Y6;C9JIZ0;C9JNV3	O95777;F2Z2Y6;C9JIZ0;C9JNV3	U6 snRNA-associated Sm-like protein LSm8	LSM8	58.782	1168400000	51	27.1802	27.2587	27.1727	26.4903	26.6532	26.8151
	0.402243	-0.169511	O95782-2;O95782	O95782-2;O95782	AP-2 complex subunit alpha-1	AP2A1	81.064	1619700000	132	27.5217	27.3646	27.3703	27.4103	27.4301	26.9077
	0.0663677	0.0608031	O95816;O95816-2	O95816;O95816-2	BAG family molecular chaperone regulator 2	BAG2	42.236	551540000	47	26.4366	25.4878	25.5406	26.0424	25.8528	25.7523
	0.0919782	-0.0941747	O95817;C9JFK9	O95817	BAG family molecular chaperone regulator 3	BAG3	20.576	91848000	37	23.5608	24.4157	23.3476	23.7137	23.3823	23.9457
	0.297653	-0.27597	O95825;A6NND8;A6NHJ8;A6NMA8;C9JAL0;O95825-2;C9K0F7;F8WF64;C9JZK8;H7C3I5;H7C3S0;C9JQD0;A0A0C4DG14;H7C338;H7C0X3	O95825;A6NND8;A6NHJ8;A6NMA8;C9JAL0;O95825-2;C9K0F7;F8WF64;C9JZK8;H7C3I5	Quinone oxidoreductase-like protein 1	CRYZL1	35.652	313020000	44	24.6858	25.0291	25.3965	24.5803	25.3748	24.3283
	0.362986	0.112744	O95831;O95831-3;O95831-4;O95831-6;O95831-2;E9PMA0;O95831-5	O95831;O95831-3;O95831-4	Apoptosis-inducing factor 1, mitochondrial	AIFM1	209.49	2607700000	174	27.7148	27.9729	28.0442	27.8924	28.0022	28.1755
	0.207346	-0.0299282	O95861;O95861-4;O95861-2;A6NF51;O95861-3;F8W1J0;F8VZG4;F8VVW8;F8VRY7	O95861;O95861-4;O95861-2;A6NF51;O95861-3;F8W1J0	3(2),5-bisphosphate nucleotidase 1	BPNT1	81.166	1818700000	120	27.4615	27.4997	27.4694	27.3445	27.4654	27.531
	0.375012	-0.536395	O95864;O95864-4;O95864-2;O95864-3;E5RGD8;E5RGZ5	O95864;O95864-4;O95864-2;O95864-3	Fatty acid desaturase 2	FADS2	9.9211	155560000	26	24.2539	23.8015	24.0725	23.9233	24.2447	22.3507
	0.0337583	0.014876	O95865;A0A140T971;Q5SSV3;Q5SRR8;H0Y7N1	O95865;A0A140T971;Q5SSV3;Q5SRR8;H0Y7N1	N(G),N(G)-dimethylarginine dimethylaminohydrolase 2	DDAH2	118.85	8114400000	146	29.6342	29.6918	29.8361	29.4698	29.8166	29.9204
	0.861388	-0.7697	O95881;V9GY50;V9GYV4	O95881	Thioredoxin domain-containing protein 12	TXNDC12	29.59	1232300000	64	27.4225	27.1562	27.4099	25.7939	27.1782	26.7074
	0.204083	0.469688	O96000;H3BPJ9;O96000-2;H3BV16	O96000;H3BPJ9;O96000-2;H3BV16	NADH dehydrogenase [ubiquinone] 1 beta subcomplex subunit 10	NDUFB10	10.416	396240000	32	22.8081	25.6906	25.1823	25.0285	25.065	24.9965
	0.235209	-0.115075	O96008;O96008-2;K7EKG4;K7EJ57	O96008;O96008-2	Mitochondrial import receptor subunit TOM40 homolog	TOMM40	100.9	885930000	49	26.3056	26.5667	26.6082	26.0671	26.6406	26.4276
	1.7068	-0.391289	O96019;O96019-2;H7C5S0;C9JQT2	O96019;O96019-2	Actin-like protein 6A	ACTL6A	148.6	2292000000	132	27.874	28.1907	28.0048	27.643	27.7095	27.543
	0.636007	-0.241397	P00338-3;P00338;P00338-4;P00338-5;P00338-2;F5GXY2;F5GYU2;F5GXH2;F5H5J4;F5H6W8;F5GZQ4;F5H8H6;F5GXC7;F5GWW2;A0A087WUM2;Q6ZMR3;F5GXU1	P00338-3;P00338;P00338-4;P00338-5;P00338-2	L-lactate dehydrogenase A chain	LDHA	290.95	32995000000	387	32.1199	31.6863	31.6958	31.4955	31.5016	31.7807
	1.70076	-1.13429	P00352;Q5SYQ9;Q5SYQ8;Q5SYQ7	P00352	Retinal dehydrogenase 1	ALDH1A1	94.484	3560300000	143	29.5041	28.8426	29.0711	27.6802	27.8806	28.4541
	2.04334	0.491297	P00367;P00367-3;P00367-2	P00367;P00367-3;P00367-2	Glutamate dehydrogenase 1, mitochondrial	GLUD1	136.89	9636500000	255	29.7195	29.5924	29.699	30.3152	29.9852	30.1843
	0.716035	-0.293869	P00387-2;P00387;P00387-3;B1AHF3	P00387-2;P00387;P00387-3;B1AHF3	NADH-cytochrome b5 reductase 3;NADH-cytochrome b5 reductase 3 membrane-bound form;NADH-cytochrome b5 reductase 3 soluble form	CYB5R3	117.55	3092200000	134	28.4754	28.1319	28.408	28.0223	28.3242	27.7873
	0.789826	0.250478	P00390-2;P00390;P00390-4;P00390-3;P00390-5;A0A2R8YF59;H0YC68	P00390-2;P00390;P00390-4;P00390-3;P00390-5	Glutathione reductase, mitochondrial	GSR	88.713	3251500000	144	28.1577	28.0987	28.2588	28.4975	28.1533	28.6159
	1.15423	-0.682489	P00403	P00403	Cytochrome c oxidase subunit 2	MT-CO2	14.243	1310100000	38	27.2919	27.349	27.3896	26.2871	27.2011	26.4948
	0.0105272	-0.00719833	P00441;H7BYH4	P00441;H7BYH4	Superoxide dismutase [Cu-Zn]	SOD1	177.05	7984000000	133	29.776	29.2562	29.6653	29.3366	29.4684	29.8708
	0.22229	-0.110914	P00491;G3V5M2;G3V2H3;G3V393	P00491;G3V5M2	Purine nucleoside phosphorylase	PNP	109.97	1803100000	119	27.2908	27.6193	27.5517	27.0429	27.5267	27.5594
	1.11961	-0.371537	P00492	P00492	Hypoxanthine-guanine phosphoribosyltransferase	HPRT1	22.326	1137500000	64	27.0157	26.9932	27.0103	26.4322	26.9414	26.531
	1.18281	0.473396	P00505;P00505-2	P00505;P00505-2	Aspartate aminotransferase, mitochondrial	GOT2	135.78	12805000000	284	29.5555	29.9375	30.1239	30.4736	30.1818	30.3817
	0.381463	-0.0723305	P00558;P00558-2	P00558;P00558-2	Phosphoglycerate kinase 1	PGK1	316.57	68823000000	384	32.6575	32.798	32.866	32.7656	32.6012	32.7378
	0.101296	0.0631714	Q5T9B7;P00568;H0YID2;Q9Y6K8-2;Q9Y6K8-3;Q9Y6K8	Q5T9B7;P00568	Adenylate kinase isoenzyme 1	AK1	59.022	6660400000	160	29.4177	29.0217	29.2935	29.477	29.5193	28.926
	0.810353	0.486306	P00813;F5GWI4;F5GXW0;F5GYD4	P00813;F5GWI4;F5GXW0	Adenosine deaminase	ADA	55.039	396280000	57	25.0318	25.0503	25.1919	25.2178	25.4019	26.1133
	0.983395	-1.15528	P00966;Q5T6L6;Q5T6L5	P00966	Argininosuccinate synthase	ASS1	43.479	659450000	74	26.3726	26.6319	26.5699	24.2928	26.056	25.7597
	0.1634	0.291061	P01111;G3V4K2;G3V5T7	P01111	GTPase NRas	NRAS	12.867	341690000	25	23.2266	25.1485	25.2658	24.6603	24.815	25.0388
	0.0414676	-0.0219822	P01116-2;P01116	P01116-2;P01116	GTPase KRas;GTPase KRas, N-terminally processed	KRAS	60.108	2207800000	68	27.4828	27.8178	27.9806	27.5923	27.943	27.68
	0.8472	-1.06769	P02452;CON__Q862S4;I3L3H7	P02452	Collagen alpha-1(I) chain	COL1A1	323.31	14492000000	428	31.9655	30.3033	30.5681	30.018	30.272	29.3439
	1.00129	-0.930893	P02461;P02461-2;H7C435	P02461;P02461-2	Collagen alpha-1(III) chain	COL3A1	323.31	37808000000	629	33.0252	31.7828	31.9996	31.482	31.6051	30.9278
	0.297523	0.197947	P02545;P02545-3;P02545-6;P02545-2;Q3BDU5;P02545-5;P02545-4;Q5TCI8;H0YAB0;A0A0C4DGC5	P02545;P02545-3;P02545-6;P02545-2;Q3BDU5;P02545-5;P02545-4;Q5TCI8	Prelamin-A/C;Lamin-A/C	LMNA	221.88	5691400000	263	29.0954	28.7806	29.1307	29.2699	28.7436	29.587
	0.327454	0.197634	P02647;F8W696	P02647;F8W696	Apolipoprotein A-I;Proapolipoprotein A-I;Truncated apolipoprotein A-I	APOA1	104.88	2514500000	87	27.68	28.2637	28.441	28.3968	28.4406	28.1403
	0.971201	0.978627	P02649;H0Y7L5;E9PEV4;E7ERP7;CON__Q03247	P02649;H0Y7L5;E9PEV4;E7ERP7	Apolipoprotein E	APOE	93.428	1643400000	97	26.0878	26.9528	27.0881	27.5607	27.1504	28.3534
	0.51354	-0.234832	P02751-17;P02751-3;P02751;P02751-7;P02751-15;P02751-6;P02751-5;P02751-10;P02751-9;P02751-14;P02751-13;P02751-8;P02751-11;P02751-4;P02751-12;H0Y7Z1;P02751-2;P02751-16;H0Y4K8	P02751-17;P02751-3;P02751;P02751-7;P02751-15;P02751-6;P02751-5;P02751-10;P02751-9;P02751-14;P02751-13;P02751-8;P02751-11;P02751-4;P02751-12;H0Y7Z1	Fibronectin;Anastellin;Ugl-Y1;Ugl-Y2;Ugl-Y3	FN1	323.31	5708500000	391	29.5257	28.9715	29.5357	28.9888	29.2433	29.0963
	0.19517	0.0990715	P02786;G3V0E5;H7C3V5;F8WBE5	P02786;G3V0E5	Transferrin receptor protein 1;Transferrin receptor protein 1, serum form	TFRC	184.29	2889300000	196	28.365	28.0556	27.9568	28.3083	28.435	27.9313
	1.29715	0.811057	P02787;F8WCI6;H7C5E8;C9JB55;F8WEK9;C9JVG0;F8WC57;CON__Q2HJF0;CON__Q29443;CON__Q0IIK2	P02787	Serotransferrin	TF	323.31	19189000000	417	30.9673	30.2561	30.2702	31.069	31.2073	31.6505
	1.75065	1.19168	P02790;Q9BS19	P02790	Hemopexin	HPX	13.819	165720000	31	23.0135	23.7224	23.0297	24.0505	24.6691	24.6209
	1.20763	1.03909	P02792	P02792	Ferritin light chain	FTL	21.413	1543100000	52	25.8517	26.8467	26.9596	27.5785	27.2539	27.943
	1.38709	1.31124	P02794;G3V192;G3V1D1;E9PRK8;E9PKY7;E9PQR3;E9PKM5;E9PK45;E9PPQ4	P02794;G3V192;G3V1D1	Ferritin heavy chain;Ferritin heavy chain, N-terminally processed;Ferritin	FTH1	74.464	1902400000	94	26.2561	26.8701	27.1704	28.4372	27.3781	28.4151
	0.779793	1.95272	P04004;H0YJW9;CON__Q3ZBS7	P04004	Vitronectin;Vitronectin V65 subunit;Vitronectin V10 subunit;Somatomedin-B	VTN	19.286	584510000	40	22.6041	26.1274	25.7631	26.726	26.3211	27.3056
	0.176065	-0.0779279	P04062-4;P04062-2;P04062;A0A0G2JNZ5;A0A0G2JLB3;P04062-5;A0A0G2JNZ0;P04062-3	P04062-4;P04062-2;P04062;A0A0G2JNZ5;A0A0G2JLB3;P04062-5;A0A0G2JNZ0;P04062-3	Glucosylceramidase	GBA	52.726	566000000	59	25.6539	25.8131	25.7296	25.4118	25.5907	25.9603
	0.387287	-0.225922	P04066	P04066	Tissue alpha-L-fucosidase	FUCA1	46.732	756600000	68	26.3514	26.4027	26.3623	25.6558	26.3981	26.3847
	0.748941	0.15055	P04075;H3BQN4;J3KPS3;P04075-2;H3BPS8;H3BUH7;H3BR04;H3BMQ8;H3BU78;H3BR68	P04075;H3BQN4;J3KPS3;P04075-2;H3BPS8;H3BUH7	Fructose-bisphosphate aldolase A;Fructose-bisphosphate aldolase	ALDOA	323.31	43326000000	414	31.8349	31.9393	32.0042	32.1893	31.9268	32.114
	0.145285	0.0556609	P04080;A0A1W2PQG6;A0A1W2PS52	P04080	Cystatin-B	CSTB	91.489	7857600000	118	29.4563	29.3285	29.676	29.672	29.3463	29.6094
	0.429148	0.309476	P04083;Q5T3N1;Q5T3N0	P04083	Annexin A1	ANXA1	320.81	8354100000	244	29.8897	29.0419	29.322	29.5983	30.0852	29.4986
	0.587876	0.274926	P04179;P04179-4;P04179-2;F5H4R2;F5GYZ5;F5H3C5;P04179-3;G8JLJ2;G5E9P6;F5GXZ9	P04179;P04179-4;P04179-2;F5H4R2;F5GYZ5;F5H3C5;P04179-3	Superoxide dismutase [Mn], mitochondrial	SOD2	246	3812300000	126	28.1258	28.4727	28.5758	28.5548	28.4655	28.9788
	1.54849	-0.593817	P04181;P04181-2	P04181;P04181-2	Ornithine aminotransferase, mitochondrial;Ornithine aminotransferase, hepatic form;Ornithine aminotransferase, renal form	OAT	100.77	2486900000	157	28.414	28.3107	28.0998	27.4374	27.9561	27.6495
	1.09951	1.38486	P04271;A8MRB1	P04271	Protein S100-B	S100B	16.231	159250000	13	23.1603	23.6223	22.1777	23.5583	24.6697	24.8868
	2.05626	1.14394	P04350;M0R278;M0QY85;M0QYM7;M0R042;M0QZL7;M0R0X0;M0QY37;M0QX14;M0R1I1	P04350	Tubulin beta-4A chain	TUBB4A	132.51	6351100000	90	27.9025	28.5575	28.6536	29.5243	29.5798	29.4414
	0.471838	0.0645587	P04406;E7EUT5	P04406;E7EUT5	Glyceraldehyde-3-phosphate dehydrogenase	GAPDH	323.31	192870000000	774	34.1119	34.1587	34.1637	34.213	34.3061	34.1089
	0.242127	0.246407	P04792;F8WE04;C9J3N8	P04792;F8WE04	Heat shock protein beta-1	HSPB1	239.77	5659600000	148	29.4858	28.1718	28.6433	28.8176	29.0025	29.2201
	1.04461	-0.278143	P04843;B7Z4L4;F8WF32	P04843;B7Z4L4	Dolichyl-diphosphooligosaccharide--protein glycosyltransferase subunit 1	RPN1	323.31	13705000000	389	30.6271	30.4507	30.5346	30.0635	30.4592	30.2552
	0.745858	-0.198821	P04844;P04844-2;Q5JYR7;Q5JYR4;F2Z3K5;Q5JYR3;H0Y5M1	P04844;P04844-2	Dolichyl-diphosphooligosaccharide--protein glycosyltransferase subunit 2	RPN2	323.31	8905100000	309	30.151	29.8292	29.7781	29.6742	29.7931	29.6945
	0.158614	0.0158354	P04899;P04899-6;P04899-3;P04899-5;P04899-2;P04899-4	P04899;P04899-6;P04899-3;P04899-5;P04899-2;P04899-4	Guanine nucleotide-binding protein G(i) subunit alpha-2	GNAI2	221.94	11393000000	278	30.2277	30.1533	30.115	30.1576	30.2154	30.1704
	0.49389	0.252171	Q93077;Q7L7L0;P04908;A0A0U1RR32;A0A0U1RRH7;Q99878;Q96KK5;Q9BTM1;Q16777;Q6FI13;P20671;P0C0S8;H0YFX9;A0A3B3IS11;Q9BTM1-2	Q93077;Q7L7L0;P04908;A0A0U1RR32;A0A0U1RRH7;Q99878;Q96KK5;Q9BTM1;Q16777;Q6FI13;P20671;P0C0S8;H0YFX9;A0A3B3IS11;Q9BTM1-2	Histone H2A type 1-C;Histone H2A type 3;Histone H2A type 1-B/E;Histone H2A type 1-J;Histone H2A type 1-H;Histone H2A.J;Histone H2A type 2-C;Histone H2A type 2-A;Histone H2A type 1-D;Histone H2A type 1;Histone H2A	HIST1H2AC;HIST3H2A;HIST1H2AB;HIST1H2AJ;HIST1H2AH;H2AFJ;HIST2H2AC;HIST2H2AA3;HIST1H2AD;HIST1H2AG	60.336	21172000000	59	30.4697	31.0046	31.0763	31.3089	30.9163	31.0818
	2.23147	0.466518	P05023-4;P05023;P05023-3;P05023-2;P20648;Q5TC01;Q5TC02;Q5TC05	P05023-4;P05023;P05023-3;P05023-2	Sodium/potassium-transporting ATPase subunit alpha-1	ATP1A1	323.31	12990000000	447	29.9848	29.9328	30.0065	30.551	30.2754	30.4973
	1.49521	0.612584	P05026-2;P05026;V9GYR2	P05026-2;P05026;V9GYR2	Sodium/potassium-transporting ATPase subunit beta-1	ATP1B1	44.289	2400700000	81	27.5287	27.3778	27.6462	28.2732	27.7858	28.3315
	0.280245	-0.152019	P05091;P05091-2;F8VP50;S4R3S4;H0YKL3	P05091;P05091-2	Aldehyde dehydrogenase, mitochondrial	ALDH2	91.945	4334300000	210	29.1398	28.6373	28.7678	28.4866	28.5962	29.006
	0.379216	0.252684	P05141;Q9H0C2	P05141	ADP/ATP translocase 2;ADP/ATP translocase 2, N-terminally processed	SLC25A5	25.786	2736100000	58	27.7646	27.6946	27.8186	28.3657	28.2055	27.4647
	0.212217	0.067887	P05165-2;P05165;P05165-3;A0A1B0GU58;A0A1B0GWI4;A0A1B0GUX9;A0A1B0GWA1;A0A1B0GTR1;H0Y5U0;Q5JTW6;H0Y4B9;H0Y798;Q5JVH2	P05165-2;P05165;P05165-3;A0A1B0GU58;A0A1B0GWI4;A0A1B0GUX9	Propionyl-CoA carboxylase alpha chain, mitochondrial	PCCA	50.414	1093800000	104	26.4923	26.7415	26.7806	26.8783	26.5846	26.7551
	0.596505	0.254962	P05198;G3V4T5;H0YJS4	P05198;G3V4T5;H0YJS4	Eukaryotic translation initiation factor 2 subunit 1	EIF2S1	55.074	2094700000	107	27.7786	27.5126	27.48	27.8636	27.5489	28.1236
	0.27528	-0.0609709	P05386	P05386	60S acidic ribosomal protein P1	RPLP1	102.68	7269600000	69	29.671	29.5168	29.5267	29.3638	29.5951	29.5727
	1.27553	-0.579402	P05387;H0YDD8;P05386-2	P05387	60S acidic ribosomal protein P2	RPLP2	121.49	11454000000	108	30.3016	30.3949	30.5947	29.5583	30.2199	29.7749
	0.718876	-0.266593	P05388;F8VWS0;P05388-2;F8VW21;F8VU65;F8VPE8;F8VZS0;G3V210;Q8NHW5;F8VQY6;F8VRK7;F8VS58;F8VWV4;F8W1K8	P05388;F8VWS0;P05388-2;F8VW21;F8VU65;F8VPE8;F8VZS0;G3V210;Q8NHW5;F8VQY6;F8VRK7	60S acidic ribosomal protein P0;60S acidic ribosomal protein P0-like	RPLP0;RPLP0P6	119.56	11475000000	222	30.2268	30.1902	30.456	30.1669	30.1775	29.7289
	0.214236	-0.231026	S4R371;P05413;S4R3A2	S4R371;P05413;S4R3A2	Fatty acid-binding protein, heart	FABP3	11.177	186560000	23	24.8597	24.1646	24.403	24.0036	23.7671	24.9636
	0.543168	0.102675	P05455;E7ERC4;E9PGX9;E9PFL9	P05455;E7ERC4	Lupus La protein	SSB	272.02	10707000000	287	29.8823	30.0778	30.04	30.0475	30.0414	30.2192
	0.490758	-0.270236	P05556;P05556-2;P05556-5;P05556-4;P05556-3;E7EQW5;C9JPK5;Q5T3E6;E9PLR6;E7EUI6;E7ERX5	P05556;P05556-2;P05556-5;P05556-4;P05556-3	Integrin beta-1	ITGB1	128.13	2388100000	114	28.2493	27.9275	27.6367	27.6586	27.9527	27.3915
	0.0559926	-0.0376104	P05783;F8VZY9;CON__H-INV:HIT000015463	P05783;F8VZY9	Keratin, type I cytoskeletal 18	KRT18	323.31	13999000000	373	30.8267	30.0576	30.619	30.5192	30.4629	30.4083
	1.00647	-0.44352	P05937;P05937-2;E5RIZ8;E5RG14	P05937;P05937-2;E5RIZ8	Calbindin	CALB1	105.68	739110000	58	26.7747	26.3266	26.6684	25.8608	26.1784	26.3999
	0.791538	-1.25662	P05997;A0A087WYX9;A0A3B3IRH9	P05997;A0A087WYX9	Collagen alpha-2(V) chain	COL5A2	229.11	1186800000	120	28.3157	26.6179	26.9726	26.0881	26.9232	25.1249
	2.20225	-0.554701	P06132;A0A1B0GVN9;A0A1B0GVZ4;H0Y5R6;Q5T446	P06132;A0A1B0GVN9;A0A1B0GVZ4;H0Y5R6	Uroporphyrinogen decarboxylase	UROD	85.251	634670000	83	26.2222	26.3026	26.2004	25.7334	25.8339	25.4938
	1.17553	1.3199	P06241;P06241-3;P06241-2;E5RFS5;E5RGT0;E5RH71;E5RIX5;E5RGM6;E5RI25;E5RFM0	P06241;P06241-3;P06241-2	Tyrosine-protein kinase Fyn	FYN	23.457	167060000	31	23.768	22.3858	23.8065	24.1529	24.8283	24.9388
	0.129444	0.0723731	P06396-2;A0A0A0MS51;A0A0A0MT01;P06396-4;P06396;CON__Q3SX14;Q5T0I0;REV__H0YJM7;REV__Q6TDU7-4;REV__Q6TDU7-2;REV__Q6TDU7-3;REV__Q6TDU7;REV__F8W8F9	P06396-2;A0A0A0MS51;A0A0A0MT01;P06396-4;P06396	Gelsolin	GSN	323.31	11183000000	419	30.4064	30.0011	29.953	30.0317	30.0607	30.4852
	0.298223	-0.0702031	P06576;H0YH81;F8W079;F8W0P7;H0YI37	P06576;H0YH81;F8W079	ATP synthase subunit beta, mitochondrial;ATP synthase subunit beta	ATP5B	323.31	59024000000	554	32.5187	32.4668	32.3963	32.3033	32.5678	32.3
	0.107134	-0.364484	R4GN98;P06703	R4GN98;P06703	Protein S100;Protein S100-A6	S100A6	4.1042	330160000	18	25.561	23.9999	24.0816	24.9486	21.9802	25.6202
	0.636435	0.0936871	P06730;P06730-2;D6RBW1;P06730-3;H0Y8J7;D6RFJ3;D6RHE2;H0Y8X3;A6NMX2	P06730;P06730-2;D6RBW1;P06730-3;H0Y8J7	Eukaryotic translation initiation factor 4E	EIF4E	44.293	1869100000	74	27.3895	27.4942	27.3427	27.567	27.4063	27.5342
	0.623766	-0.189257	P06733;A0A2R8Y6G6;P06733-2;K7EM90	P06733;A0A2R8Y6G6;P06733-2	Alpha-enolase	ENO1	323.31	160100000000	698	34.0674	34.2136	33.9564	33.675	34.0653	33.9294
	0.808464	-0.597824	P06737-2;P06737;E9PK47	P06737-2;P06737;E9PK47	Glycogen phosphorylase, liver form;Alpha-1,4 glucan phosphorylase	PYGL	82.79	726400000	78	26.1484	26.6486	26.582	25.5517	26.4698	25.564
	0.0148694	-0.0067482	P06744;A0A0A0MTS2;A0A2U3TZU2;P06744-2;K7EQ48;A0A0J9YXP8;A0A2R8Y6C7;A0A0J9YYH3;A0A0J9YX90;K7EPY4;K7ERC6;K7EP41;K7ENA0;A0A0J9YXM3;A0A2R8YF08;K7ELR7;K7EIL4;A0A0J9YXH9;K7ERK8;A0A0J9YYI8;K7ESF4	P06744;A0A0A0MTS2;A0A2U3TZU2;P06744-2;K7EQ48;A0A0J9YXP8;A0A2R8Y6C7;A0A0J9YYH3;A0A0J9YX90	Glucose-6-phosphate isomerase	GPI	323.31	18687000000	313	30.7948	30.8194	30.823	30.9885	30.5082	30.9202
	0.396824	-0.160634	P06748-2;P06748;P06748-3;E5RI98;E5RGW4	P06748-2;P06748;P06748-3	Nucleophosmin	NPM1	323.31	25781000000	233	31.3048	31.4817	31.5345	31.3093	30.9952	31.5345
	1.00435	-0.428577	P06756-3;P06756;P06756-2;H7BZG1	P06756-3;P06756;P06756-2	Integrin alpha-V;Integrin alpha-V heavy chain;Integrin alpha-V light chain	ITGAV	61.924	622070000	105	26.1323	26.2278	26.1694	25.5207	26.1429	25.5801
	0.55469	-0.893502	P07093-2;P07093;P07093-3;C9JN98	P07093-2;P07093;P07093-3;C9JN98	Glia-derived nexin	SERPINE2	10.57	122330000	17	23.8031	24.083	24.6426	22.1423	24.4612	23.2448
	0.534229	-0.84668	P07099;B1AQP9;B1AQP8	P07099	Epoxide hydrolase 1	EPHX1	27.804	1152700000	62	27.1197	26.7361	27.0043	24.7536	27.0124	26.554
	0.730466	0.320771	P07148;A8MW49	P07148;A8MW49	Fatty acid-binding protein, liver	FABP1	201.46	4632900000	75	29.2085	28.849	28.8137	29.4515	29.4169	28.9651
	1.09283	0.563046	P07195;A0A3B3IS95;A8MW50;C9J7H8;F5H793	P07195;A0A3B3IS95;A8MW50	L-lactate dehydrogenase B chain;L-lactate dehydrogenase	LDHB	323.31	89057000000	334	32.2987	32.945	32.725	33.3009	32.9273	33.4297
	1.66588	0.980054	P07196;A0A0S2Z436;A0A087X0W2	P07196;A0A0S2Z436;A0A087X0W2	Neurofilament light polypeptide	NEFL	126.65	1981700000	150	26.6619	27.0967	27.5412	28.0347	27.9601	28.2451
	0.18994	-0.0582956	P07237;H7BZ94;H0Y3Z3;I3L398;I3L312;I3NI03;I3L4M2;I3L3U6;I3L0S0;I3L3P5;I3L514;I3L1Y5	P07237;H7BZ94;H0Y3Z3	Protein disulfide-isomerase	P4HB	323.31	34332000000	513	31.8946	31.5459	31.7911	31.6986	31.5832	31.7749
	0.821418	0.475473	P07311;G3V2U7;G3V3F8;G3V597;P07311-2	P07311;G3V2U7	Acylphosphatase-1;Acylphosphatase	ACYP1	42.567	607210000	26	25.1964	25.8797	25.8984	25.9776	26.0182	26.4051
	1.51536	0.315075	P07355;P07355-2;H0YM50;H0YN42;H0YMD0;H0YMU9;A6NMY6;H0YKS4;H0YMM1;H0YKZ7;H0YLV6;H0YMT9;H0YKX9;H0YNP5;H0YKL9;H0YMW4;H0YN28;H0YL33;H0YKV8;H0YNA0;H0YN52;H0YMD9;H0YLE2;H0YNB8;H0YKN4	P07355;P07355-2;H0YM50;H0YN42;H0YMD0;H0YMU9;A6NMY6;H0YKS4	Annexin A2;Annexin;Putative annexin A2-like protein	ANXA2;ANXA2P2	323.31	24167000000	309	31.288	31.0196	31.1017	31.5518	31.3662	31.4366
	1.08467	-0.471682	P07384;E9PL37;E9PRM1;E9PLX0;E9PJJ3;E9PLC9;E9PMC6;E9PJA6;E9PSA6;E9PQB3;E9PIA9	P07384	Calpain-1 catalytic subunit	CAPN1	101.58	1439900000	125	27.655	27.2345	27.2968	26.7163	27.2315	26.8235
	0.695962	-0.137496	Q5JP53;P07437;Q5ST81;A6NNZ2	Q5JP53;P07437;Q5ST81	Tubulin beta chain	TUBB	154.7	73629000000	230	32.8209	32.9007	33.0741	32.7325	32.8938	32.7569
	0.436885	-0.314554	P07585;P07585-2;F8VXZ8;F8VUF6;F8VWU0;P07585-4;P07585-3;F8VX58;H0YI87;H0YIH3;F8VNV6	P07585;P07585-2	Decorin	DCN	110.68	8472700000	153	30.4864	29.551	29.6747	29.4245	29.7564	29.5875
	1.30926	-0.538366	P07686;Q5URX0;H0YA83;H0Y9B6;D6REQ8;H0Y9M3	P07686;Q5URX0	Beta-hexosaminidase subunit beta;Beta-hexosaminidase subunit beta chain B;Beta-hexosaminidase subunit beta chain A	HEXB	86.722	4486600000	165	29.0926	29.0038	29.2426	28.2814	28.9008	28.5417
	0.211627	-0.169746	P07711;Q5T8F0;Q5QP40;Q5NE16;P43235;O60911	P07711	Cathepsin L1;Cathepsin L1 heavy chain;Cathepsin L1 light chain	CTSL	16.589	262340000	29	25.5357	24.756	24.6261	24.8266	25.0096	24.5723
	0.481362	0.145945	P07737;K7EJ44;CON__P02584;I3L3D5	P07737;K7EJ44	Profilin-1	PFN1	147.34	32464000000	221	31.6519	31.4808	31.6686	31.8896	31.5139	31.8355
	0.771693	0.285608	P07741;P07741-2;H3BQF1;H3BQB1;H3BQZ9;H3BSW3	P07741;P07741-2;H3BQF1;H3BQB1;H3BQZ9	Adenine phosphoribosyltransferase	APRT	79.567	2224100000	76	27.7675	27.4785	27.5677	27.749	27.7364	28.1851
	0.0214202	0.00426038	P07814;V9GYZ6;V9GZ76	P07814;V9GYZ6	Bifunctional glutamate/proline--tRNA ligase;Glutamate--tRNA ligase;Proline--tRNA ligase	EPRS	323.31	9713200000	538	29.935	29.8057	29.8843	29.9862	29.8062	29.8454
	0.293724	-0.0813363	P07858;E9PKQ7;E9PNL5;E9PHZ5;E9PLY3;E9PSG5;E9PQM1;R4GMQ5;E9PR54;E9PJ67;E9PCB3	P07858	Cathepsin B;Cathepsin B light chain;Cathepsin B heavy chain	CTSB	140.41	5079600000	99	29.3476	29.0189	29.111	29.1023	28.9732	29.158
	1.12962	0.54078	P07900;P07900-2;G3V2J8;Q14568	P07900;P07900-2	Heat shock protein HSP 90-alpha	HSP90AA1	323.31	217270000000	1108	33.6153	34.0391	34.022	34.4872	34.102	34.7096
	1.70035	0.340281	P07954-2;P07954	P07954-2;P07954	Fumarate hydratase, mitochondrial	FH	323.31	7500400000	264	29.1653	29.4503	29.3804	29.7297	29.6308	29.6565
	0.307698	0.168468	P08133;P08133-2;E7EMC6;E5RI05;E5RJF5;E5RK63;E5RFF0;E5RJR0;E5RIU8	P08133;P08133-2;E7EMC6	Annexin A6;Annexin	ANXA6	323.31	18890000000	488	30.5249	30.7314	30.8173	31.035	30.4498	31.0942
	0.0346822	-0.0112368	Q5JR08;P08134;E9PQH6;Q5JR07;Q5JR05;E9PLA2;Q5JR06;E9PN11;U3KQA9;U3KQV3	Q5JR08;P08134;E9PQH6;Q5JR07;Q5JR05;E9PLA2;Q5JR06;E9PN11;U3KQA9;U3KQV3	Rho-related GTP-binding protein RhoC	RHOC	27.637	938960000	28	26.7766	26.4597	26.6209	26.6072	26.7125	26.5036
	1.64558	-0.555534	P08236-2;P08236;P08236-3;F8WBK6;F2Z3L6	P08236-2;P08236;P08236-3	Beta-glucuronidase	GUSB	84.901	437220000	67	25.8234	25.8926	25.7067	25.1661	25.5333	25.0566
	0.750423	0.132206	P08238;Q58FF7	P08238	Heat shock protein HSP 90-beta	HSP90AB1	323.31	66499000000	539	32.3164	32.4356	32.4694	32.6719	32.4701	32.4761
	1.34675	0.214652	P08240-2;P08240	P08240-2;P08240	Signal recognition particle receptor subunit alpha	SRPR	87.36	529330000	83	25.7491	25.6749	25.5933	25.9947	25.8768	25.7898
	0.66775	-0.801264	P08243-2;P08243;P08243-3;F8WEJ5;C9J057;C9JT45;C9JM09;C9JLN6	P08243-2;P08243;P08243-3;F8WEJ5	Asparagine synthetase [glutamine-hydrolyzing]	ASNS	67.583	840320000	75	27.567	26.0865	26.6507	26.0128	26.517	25.3707
	0.982176	-1.20439	P08473;C9JR96;C9J9X7;C9IYX7	P08473	Neprilysin	MME	132.34	1828900000	120	28.9781	27.6204	27.4093	26.6359	27.3758	26.3829
	0.822956	0.360875	P08559;P08559-2;P08559-4;P08559-3;Q5JPU3;Q5JPT9;Q5JPU0;Q5JPU1;P29803	P08559;P08559-2;P08559-4;P08559-3;Q5JPU3	Pyruvate dehydrogenase E1 component subunit alpha, somatic form, mitochondrial	PDHA1	79.166	1974300000	143	27.4769	27.2063	27.5195	27.9407	27.4059	27.9386
	0.0175381	-0.0128454	P08572;A0A3B3IS47;A0A087WY39	P08572	Collagen alpha-2(IV) chain;Canstatin	COL4A2	13.145	334990000	28	25.1873	25.3158	25.6062	25.1601	25.1353	25.7754
	0.815969	0.456557	P08574	P08574	Cytochrome c1, heme protein, mitochondrial	CYC1	64.164	1133200000	79	26.6421	26.9712	26.1026	26.9604	27.137	26.9882
	0.130345	-0.0663554	P08579	P08579	U2 small nuclear ribonucleoprotein B	SNRPB2	23.436	1184400000	56	26.8253	27.1115	26.8781	26.8781	26.5829	27.1548
	0.607428	0.539992	P08621-2;P08621;P08621-3;P08621-4;M0QYR1;M0QX04	P08621-2;P08621;P08621-3	U1 small nuclear ribonucleoprotein 70 kDa	SNRNP70	63.774	1840700000	86	26.6761	27.4707	27.4013	27.9077	27.1231	28.1374
	0.777146	0.113286	P08670;B0YJC4;B0YJC5;A0A1B0GTT5;A0A1B0GVG8	P08670;B0YJC4;B0YJC5	Vimentin	VIM	323.31	177150000000	920	33.9962	34.0729	33.9892	34.2049	34.0101	34.1832
	0.987842	0.26589	P08754;P11488;P19087;A8MTJ3;A0A3B3ITG4;A0A3B3IRK0;A0A3B3IU77;A0A3B3IS42;A0A3B3ITX3;P38405-3	P08754	Guanine nucleotide-binding protein G(k) subunit alpha	GNAI3	213.52	1345100000	91	26.9221	26.8463	26.8561	27.1551	26.9192	27.3478
	0.175209	0.0731023	P08758;D6RBL5;E9PHT9;D6RBE9;D6RCN3	P08758;D6RBL5;E9PHT9	Annexin A5;Annexin	ANXA5	321.49	36134000000	349	31.4067	31.9195	31.7555	31.7009	31.7433	31.8568
	0.411222	-0.218071	P09012;M0R268;M0QZG7;M0R0G9;M0QXK2;M0R221;M0R2B8	P09012;M0R268;M0QZG7	U1 small nuclear ribonucleoprotein A	SNRPA	38.431	1700300000	82	27.241	27.5158	27.6824	27.485	26.8946	27.4054
	0.731491	1.08058	P09067	P09067	Homeobox protein Hox-B5	HOXB5	72.122	110600000	20	22.5817	24.8507	24.0227	24.7091	24.8249	25.1628
	1.50844	0.805563	P09104;P09104-2;F5H0C8;F5H1C3;U3KQP4;U3KQQ1	P09104;P09104-2;F5H0C8	Gamma-enolase;Enolase	ENO2	323.31	25515000000	354	30.4106	31.1796	30.8923	31.6334	31.4542	31.8117
	1.3267	0.410508	P09110;C9JDE9;H7C131;P09110-2;B4DVF4;H0Y4D4;F2Z2Q6;F2Z3P7	P09110;C9JDE9;H7C131;P09110-2	3-ketoacyl-CoA thiolase, peroxisomal	ACAA1	27.459	312550000	51	24.8273	24.856	25.2697	25.4137	25.3483	25.4225
	0.873991	-0.473606	P09211;A8MX94;A0A087X2E9;A0A2R8Y5E5;A0A087X243	P09211;A8MX94	Glutathione S-transferase P	GSTP1	323.31	48766000000	322	32.6955	32.2462	32.4167	31.6905	32.4009	31.8461
	1.3395	-0.620136	P09382;F8WEI7	P09382	Galectin-1	LGALS1	155.64	5802400000	106	29.8543	29.2778	29.5972	29.0204	28.6915	29.1571
	2.21079	0.227121	P09417;P09417-2;B7Z415;D6RGG7;H0Y8F7;D6RHJ7	P09417;P09417-2;B7Z415;D6RGG7;H0Y8F7	Dihydropteridine reductase	QDPR	77.947	3844700000	107	28.2713	28.3894	28.3329	28.5701	28.5083	28.5967
	0.557466	0.454929	Q5T7C4;P09429;B2RPK0;P23497	Q5T7C4;P09429;B2RPK0	High mobility group protein B1;Putative high mobility group protein B1-like 1	HMGB1;HMGB1P1	304.33	28056000000	264	30.8683	31.1781	31.1926	31.6365	30.8909	32.0764
	0.555804	0.49004	P09486;F5GY03;E5RK62	P09486;F5GY03	SPARC	SPARC	102.24	2493000000	111	28.1858	26.8911	27.7639	27.9962	28.0416	28.2732
	0.0134464	-0.00761223	P09488;E7EWW9;P09488-2;B9ZVX7;H3BQT3	P09488;E7EWW9;P09488-2;B9ZVX7;H3BQT3	Glutathione S-transferase Mu 1	GSTM1	44.898	385780000	30	25.6875	25.2558	25.096	25.4588	25.3052	25.2524
	0.536824	-0.211264	P09496-2;P09496-4;P09496;F8WF69;P09496-5;C9J8P9	P09496-2;P09496-4;P09496;F8WF69;P09496-5	Clathrin light chain A	CLTA	259.1	1965600000	69	27.9897	27.5349	27.8439	27.7751	27.3937	27.5659
	2.24337	0.748311	P09497-2	P09497-2			121.47	1299700000	85	26.6413	26.4524	26.5504	27.4685	27.0473	27.3733
	0.426955	-0.155793	P09525;Q6P452;P09525-2;B4E1S2	P09525;Q6P452;P09525-2	Annexin A4;Annexin	ANXA4	82.97	2179800000	105	27.7208	27.7593	27.3946	27.2829	27.4802	27.6443
	0.0209318	-0.00754674	P09543-2;P09543;K7ERC4;C9K0L8;K7ERZ0;K7EN66	P09543-2;P09543	2,3-cyclic-nucleotide 3-phosphodiesterase	CNP	160.72	2261700000	139	27.7446	27.8855	27.7405	27.9282	27.5662	27.8535
	0.448461	-0.738067	P09619;E5RJ14;E5RH16;P09619-2	P09619	Platelet-derived growth factor receptor beta	PDGFRB	9.5994	215280000	23	25.051	25.1233	24.6859	22.8679	24.5936	25.1845
	1.37043	0.420088	P09622;E9PEX6;P09622-3;P09622-2;F8WDM5;A0A1W2PR83;F2Z2E3	P09622;E9PEX6;P09622-3;P09622-2	Dihydrolipoyl dehydrogenase, mitochondrial;Dihydrolipoyl dehydrogenase	DLD	205.34	5265700000	206	28.7017	28.657	28.688	29.1965	28.8222	29.2882
	0.103014	0.106493	P09651;F8W6I7;P09651-3;P09651-2;F8VZ49;Q32P51;F8VTQ5;A0A2R8Y4L2;F8VYN5;F8W646;H0YH80	P09651;F8W6I7;P09651-3;P09651-2;F8VZ49;Q32P51;F8VTQ5;A0A2R8Y4L2	Heterogeneous nuclear ribonucleoprotein A1;Heterogeneous nuclear ribonucleoprotein A1, N-terminally processed;Heterogeneous nuclear ribonucleoprotein A1-like 2	HNRNPA1;HNRNPA1L2	177	32497000000	383	30.926	31.8368	31.8469	31.9924	31.2592	31.6777
	0.997061	-0.382249	P09661;H0YKK0;H0YMA0;H0YLR3	P09661;H0YKK0	U2 small nuclear ribonucleoprotein A	SNRPA1	100.47	1603100000	90	27.5763	27.454	27.7248	27.5163	26.9761	27.116
	1.66301	-0.577728	P09874;Q5VX84;Q5VX85	P09874	Poly [ADP-ribose] polymerase 1	PARP1	99.47	2138900000	168	27.9552	28.0968	27.9788	27.7071	27.1822	27.4083
	1.72356	0.841759	P09936;D6RE83;D6R956;D6R974;D6RF53	P09936;D6RE83;D6R956;D6R974	Ubiquitin carboxyl-terminal hydrolase isozyme L1;Ubiquitin carboxyl-terminal hydrolase	UCHL1	323.31	29845000000	274	30.6192	30.9449	31.0074	31.9142	31.3305	31.8521
	0.13505	-0.0174567	P09960;P09960-4;P09960-2;P09960-3;B4DEH5	P09960;P09960-4;P09960-2;P09960-3	Leukotriene A-4 hydrolase	LTA4H	230.97	7488400000	304	29.3503	29.4737	29.4959	29.4044	29.4111	29.4521
	0.815639	0.274331	P09972;A8MVZ9;J3KSV6;J3QKP5;C9J8F3;J3QKK1;K7EKH5	P09972;A8MVZ9	Fructose-bisphosphate aldolase C;Fructose-bisphosphate aldolase	ALDOC	292.86	15624000000	309	30.0982	30.2964	30.5474	30.6691	30.4169	30.679
	1.19989	1.26264	Q71UI9;P0C0S5;C9J0D1;Q71UI9-2;Q71UI9-4;Q71UI9-3;C9J386;Q71UI9-5	Q71UI9;P0C0S5;C9J0D1;Q71UI9-2;Q71UI9-4;Q71UI9-3	Histone H2A.V;Histone H2A.Z;Histone H2A	H2AFV;H2AFZ	108.84	1860700000	60	25.8596	27.1724	27.132	28.1998	27.4997	28.2524
	0.4653	-0.232677	P0DN76;Q01081-2;Q01081;Q01081-4;A0A1B0GW87;M0QYK5;M0R2N4;Q01081-3;Q8WU68-3;Q8WU68-2;Q8WU68;K7EJH3;K7EJM7	P0DN76;Q01081-2;Q01081;Q01081-4	Splicing factor U2AF 35 kDa subunit	U2AF1	101.6	1922200000	74	27.3861	27.6396	27.874	27.6907	27.3883	27.1227
	1.16395	0.656315	P0DN79;P35520;P35520-2;C9JMA6;H7C2H4;H7C1W6;H7C2W0	P0DN79;P35520;P35520-2	Cystathionine beta-synthase	CBS	47.948	304220000	44	23.9294	24.7491	24.581	25.2324	24.9263	25.0697
	0.277049	-0.0645447	P10155;P10155-3;P10155-5;P10155-4;G5E9R9;P10155-2;H0Y9N5;D6RE09;D6RDN1	P10155;P10155-3;P10155-5;P10155-4	60 kDa SS-A/Ro ribonucleoprotein	TROVE2	169.13	4479000000	169	28.8487	28.8534	28.928	28.6379	28.8602	28.9384
	1.43282	-0.739815	P10253;I3L3L3;I3L0S5	P10253	Lysosomal alpha-glucosidase;76 kDa lysosomal alpha-glucosidase;70 kDa lysosomal alpha-glucosidase	GAA	132.91	3322900000	178	28.9344	28.6049	28.9155	27.7085	28.4536	28.0733
	0.376928	-0.586594	P10301	P10301	Ras-related protein R-Ras	RRAS	15.135	301300000	31	25.2529	24.9558	25.1409	25.1133	25.2391	23.2375
	0.605839	-0.24231	P10515;H0YDD4;E9PEJ4	P10515;H0YDD4;E9PEJ4	Dihydrolipoyllysine-residue acetyltransferase component of pyruvate dehydrogenase complex, mitochondrial;Acetyltransferase component of pyruvate dehydrogenase complex	DLAT	66.913	1828700000	128	27.4339	27.5639	27.793	27.1145	27.6164	27.3331
	0.110682	-0.0423463	P10586-2;P10586;H0Y6Z7;H0Y4H1;H0Y7Z9;H0Y380	P10586-2;P10586;H0Y6Z7;H0Y4H1;H0Y7Z9;H0Y380	Receptor-type tyrosine-protein phosphatase F	PTPRF	62.016	442550000	77	25.5917	25.2771	25.4949	25.3042	25.3151	25.6173
	0.533338	-0.146668	P10599;P10599-2	P10599;P10599-2	Thioredoxin	TXN	21.296	14081000000	80	30.3511	30.5174	30.5474	30.3126	30.5127	30.1506
	0.143295	0.0740388	P10606	P10606	Cytochrome c oxidase subunit 5B, mitochondrial	COX5B	13.887	1348400000	47	27.1454	27.0932	26.9459	27.3393	26.7722	27.2952
	0.767423	-0.338487	P10644;P10644-2;K7EM13;K7EPB2;K7EMZ6;K7EIE5;K7EID3;K7EJ40;K7EK41;K7EQK3;K7EMU2;K7EKR1;K7EPR5;X6RAV4;H7BYW5;C9JSK5;P31321	P10644;P10644-2;K7EM13;K7EPB2	cAMP-dependent protein kinase type I-alpha regulatory subunit;cAMP-dependent protein kinase type I-alpha regulatory subunit, N-terminally processed	PRKAR1A	55.17	883870000	87	26.8793	26.3068	26.5618	26.3083	26.4078	26.0163
	0.0506384	-0.112809	P10645;G5E968	P10645;G5E968	Chromogranin-A;Vasostatin-1;Vasostatin-2;EA-92;ES-43;Pancreastatin;SS-18;WA-8;WE-14;LF-19;Catestatin;AL-11;GV-19;GR-44;ER-37;GE-25;Serpinin-RRG;Serpinin;p-Glu serpinin precursor	CHGA	10.35	50042000	8	23.9527	23.6982	23.0178	24.573	22.126	23.6312
	1.56382	0.225686	P10768;X6RA14;H7BZT7;U3KQT1	P10768;X6RA14;H7BZT7	S-formylglutathione hydrolase	ESD	128.4	9185400000	218	29.6154	29.7764	29.6408	29.9012	29.8285	29.9799
	1.26266	0.34808	P10809;E7ESH4;E7EXB4;P10809-2;C9JL25;C9JL19;C9JCQ4;C9J0S9	P10809	60 kDa heat shock protein, mitochondrial	HSPD1	323.31	108940000000	875	32.8793	33.1641	33.0724	33.3785	33.2204	33.5611
	1.38486	1.09706	P10909-4;P10909;P10909-5;P10909-2;P10909-3;H0YC35;H0YLK8;H0YAS8;E7ERK6;E5RG36;E5RGB0;E5RH61;E5RJZ5;E7ETB4	P10909-4;P10909;P10909-5;P10909-2;P10909-3;H0YC35;H0YLK8	Clusterin;Clusterin beta chain;Clusterin alpha chain;Clusterin	CLU	93.78	2263700000	88	26.666	26.8963	26.5915	27.9795	27.1292	28.3364
	0.0135643	-0.00591787	P11021	P11021	78 kDa glucose-regulated protein	HSPA5	323.31	82555000000	833	33.1427	32.7127	33.0125	33.0787	32.9237	32.8479
	1.29449	1.29827	P11047;Q9Y6N6	P11047	Laminin subunit gamma-1	LAMC1	323.31	14444000000	333	29.0353	30.3064	30.0262	31.0652	30.6334	31.5641
	1.45233	1.18466	P11137-3;P11137;E7EV03;P11137-2;P11137-4;A8MZ31;H7BZB9	P11137-3;P11137	Microtubule-associated protein 2	MAP2	323.31	17332000000	774	29.2349	30.3276	30.1497	31.3662	30.7793	31.1207
	0.489124	0.0533511	P11142;E9PKE3;P11142-2;E9PNE6;E9PN89;A8K7Q2;E9PLF4;E9PQQ4;E9PQK7;E9PK54;E9PPY6;E9PN25;E9PI65;E9PS65;E9PM13	P11142;E9PKE3;P11142-2;E9PNE6;E9PN89;A8K7Q2	Heat shock cognate 71 kDa protein	HSPA8	323.31	90914000000	651	32.9287	33.0371	33.068	33.0251	33.1001	33.0686
	0.0445323	-0.0282822	P11166	P11166	Solute carrier family 2, facilitated glucose transporter member 1	SLC2A1	43.023	1326600000	81	27.1891	26.8435	27.2398	27.204	26.7096	27.2739
	0.413764	-0.523248	P11169;Q8TDB8-4;Q8TDB8-2;Q8TDB8;Q8TDB8-5	P11169;Q8TDB8-4;Q8TDB8-2;Q8TDB8;Q8TDB8-5	Solute carrier family 2, facilitated glucose transporter member 3;Solute carrier family 2, facilitated glucose transporter member 14	SLC2A3;SLC2A14	39.09	293620000	24	25.0992	24.8505	25.9882	25.0454	23.9826	25.3402
	0.377687	-0.246775	P11171;P11171-2;P11171-5;A0A2U3TZH6;A0A2R8YD30;P11171-3;Q4VB86;A0A2R8Y7Y3;P11171-6;P11171-4;A0A2R8YCW8;A0A2R8Y5G2;A0A2R8Y5Z6;P11171-7;A0A3B3IUD6;A0A2R8Y570;A0A3B3IU06;A0A2R8YFR9;A0A2R8Y6G5;A0A3B3ITP0;A0A2R8Y420;A0A2R8Y6D0;A0A2R8Y7N0;A0A2R8Y4N6;A0A1B0GWG0;A0A3B3ITC5;A0A2R8Y6T6;A0A2R8Y5C8;A0A2R8YFU8;A0A2R8Y783	P11171;P11171-2;P11171-5;A0A2U3TZH6;A0A2R8YD30;P11171-3;Q4VB86;A0A2R8Y7Y3;P11171-6;P11171-4;A0A2R8YCW8;A0A2R8Y5G2;A0A2R8Y5Z6;P11171-7;A0A3B3IUD6;A0A2R8Y570;A0A3B3IU06;A0A2R8YFR9;A0A2R8Y6G5;A0A3B3ITP0	Protein 4.1	EPB41	60.269	1381100000	113	27.5478	27.2096	27.2108	27.4741	26.6147	27.139
	1.18403	-0.614262	P11172;P11172-3;P11172-2;E9PFD2;P11172-4;F2Z3P2;F2Z303;F8WDG4	P11172;P11172-3;P11172-2	Uridine 5-monophosphate synthase;Orotate phosphoribosyltransferase;Orotidine 5-phosphate decarboxylase	UMPS	68.374	926380000	99	26.7175	26.805	26.6421	26.2275	26.4484	25.6459
	0.947203	-0.189465	P11177-2;P11177;P11177-3;C9J634;F8WF02	P11177-2;P11177;P11177-3;C9J634	Pyruvate dehydrogenase E1 component subunit beta, mitochondrial	PDHB	82.159	2828400000	138	28.1415	28.2353	28.1644	27.944	28.1635	27.8653
	0.739884	-0.36532	P11182;Q5VVL7	P11182;Q5VVL7	Lipoamide acyltransferase component of branched-chain alpha-keto acid dehydrogenase complex, mitochondrial	DBT	33.528	770700000	67	26.425	26.4193	26.4405	25.8533	26.5153	25.8202
	0.649333	0.300799	P11216;H0Y4Z6	P11216	Glycogen phosphorylase, brain form	PYGB	226.05	6503900000	310	28.8753	29.1087	29.15	29.6804	29.3376	29.0185
	1.39452	-0.771735	P11217;P11217-2	P11217;P11217-2	Glycogen phosphorylase, muscle form	PYGM	15.706	86967000	32	23.8343	23.3934	23.5561	22.8329	23.2051	22.4306
	0.182738	-0.127714	P11233;H7C3P7;F8WEQ6	P11233;H7C3P7	Ras-related protein Ral-A	RALA	24.509	880380000	39	25.7999	26.5826	26.3502	25.9154	26.3613	26.0728
	0.00210882	0.00110245	P11234;P11234-2;C9J6B1;P11234-3;C9JQB3;C9JPE8;C9JYR1	P11234;P11234-2;C9J6B1;P11234-3;C9JQB3;C9JPE8;C9JYR1	Ras-related protein Ral-B	RALB;RALA	132.91	1929300000	73	27.3256	27.7463	27.7549	27.4483	27.6039	27.7779
	1.1515	-0.652967	P11279;P11279-2	P11279;P11279-2	Lysosome-associated membrane glycoprotein 1	LAMP1	66.573	2776400000	59	28.8208	28.306	28.1871	27.7024	28.1341	27.5184
	0.202514	-0.0362542	P11413;P11413-2;P11413-3;E7EUI8;E9PD92;E7EM57	P11413;P11413-2;P11413-3;E7EUI8;E9PD92	Glucose-6-phosphate 1-dehydrogenase	G6PD	105.28	1976300000	174	27.6933	27.4976	27.7033	27.6278	27.5721	27.5854
	1.05235	-0.433867	P11498;E9PS68;P11498-2;E9PRE7	P11498	Pyruvate carboxylase, mitochondrial	PC	44.884	321030000	53	24.8855	25.3314	25.3634	24.5532	24.7666	24.959
	1.35511	-0.327323	P11586	P11586	C-1-tetrahydrofolate synthase, cytoplasmic;Methylenetetrahydrofolate dehydrogenase;Methenyltetrahydrofolate cyclohydrolase;Formyltetrahydrofolate synthetase;C-1-tetrahydrofolate synthase, cytoplasmic, N-terminally processed	MTHFD1	321.62	6530100000	344	29.4272	29.5639	29.4324	29.3276	29.1455	28.9685
	0.00383205	-0.0110232	P11717;S4R328	P11717	Cation-independent mannose-6-phosphate receptor	IGF2R	57.346	326450000	59	26.3781	25.0251	23.2501	24.4473	25.331	24.8419
	0.452774	-0.114061	P11766;H0YAG8;D6RFE4;D6R9G2;D6RAY0	P11766;H0YAG8	Alcohol dehydrogenase class-3	ADH5	246.02	12046000000	267	30.1323	30.2985	30.4179	30.0716	30.1299	30.3051
	0.799965	-1.51198	P11908;P11908-2;H7C540;D3YTJ7;A6NMS2	P11908;P11908-2;H7C540	Ribose-phosphate pyrophosphokinase 2	PRPS2	62.613	373040000	29	25.5062	25.2695	25.3964	22.2603	25.2451	24.1307
	0.137926	0.0551612	P11940;E7EQV3;E7ERJ7;P11940-2;A0A087WTT1;H0YAR2;H0YBN4;E5RJB9;H0YAS6;H0YB75;E5RGH3;E5RH24;H0YB86;H0YAS7;Q4VXU2;H0YAP2;E5RHG7;H0YC10;Q4VXU2-2;E5RGC4;E5RFD8;H0YAW6;E5RJM8;Q96DU9-2;Q96DU9	P11940;E7EQV3;E7ERJ7;P11940-2;A0A087WTT1	Polyadenylate-binding protein 1;Polyadenylate-binding protein	PABPC1	206.39	10011000000	273	29.9094	29.795	29.995	30.1188	29.6851	30.061
	2.32431	-0.859873	P12004	P12004	Proliferating cell nuclear antigen	PCNA	142.95	2874600000	133	28.5683	28.7506	28.467	27.575	27.9852	27.646
	0.44752	-0.132526	P12081;P12081-4;P12081-2;B3KWE1;P12081-3;B4DDD8;B4E1C5;E7ETE2;D6RF05;A0A2R8YCI2;A0A2R8YFR1	P12081;P12081-4;P12081-2;B3KWE1;P12081-3;B4DDD8;B4E1C5;E7ETE2	Histidine--tRNA ligase, cytoplasmic	HARS	82.569	1557200000	114	27.3645	27.3135	27.2966	27.1787	27.4166	26.9817
	0.74982	-0.696875	P12110;P12110-3;P12110-2;C9JH44;H7C0M5	P12110;P12110-3;P12110-2	Collagen alpha-2(VI) chain	COL6A2	94.689	1549700000	110	28.2	26.9114	27.4685	26.6906	27.2376	26.5609
	1.44326	-0.68048	P12111-2;P12111;E7ENL6;P12111-4;P12111-3;P12111-5;C9JNG9	P12111-2;P12111;E7ENL6;P12111-4;P12111-3;P12111-5	Collagen alpha-3(VI) chain	COL6A3	323.31	6922100000	529	30.1056	29.4241	29.8024	28.9068	29.2113	29.1726
	1.42738	0.585135	P12235;V9GYG0	P12235;V9GYG0	ADP/ATP translocase 1	SLC25A4	17.365	1208200000	45	26.0925	26.1088	26.5182	26.5798	27.0241	26.8712
	1.77643	0.409897	P12236	P12236	ADP/ATP translocase 3;ADP/ATP translocase 3, N-terminally processed	SLC25A6	121.46	18207000000	242	30.2809	30.414	30.4763	30.8441	30.6342	30.9226
	0.144864	-0.0590051	P12268;H0Y4R1;E7ETK5	P12268;H0Y4R1	Inosine-5-monophosphate dehydrogenase 2	IMPDH2	199.88	4762800000	240	28.9152	28.8078	28.9937	28.9945	28.9812	28.5639
	0.123242	-0.0570043	P12270;P12270-2;Q5SWX9	P12270	Nucleoprotein TPR	TPR	323.31	5182500000	477	28.9105	29.0443	29.0346	29.1707	28.6237	29.0241
	0.348218	0.245782	P12277;G3V4N7;H0YJG0;G3V461;H0YJK0;P06732;G3V2I1	P12277;G3V4N7	Creatine kinase B-type	CKB	323.31	112530000000	794	32.7896	33.5996	33.4027	33.5338	33.7777	33.2178
	0.559537	-0.221636	P12429;D6RA82;D6RFG5;D6RCA8;D6RAZ8;D6RFJ9	P12429;D6RA82	Annexin A3;Annexin	ANXA3	90.665	1601100000	104	27.6288	27.222	27.497	27.0702	27.4823	27.1305
	1.00188	-0.407179	P12814-2;P12814;P12814-3;P12814-4;H9KV75;G3V2N5;G3V2W4;H7C5W8;H0YJW3;H0YJ11;G3V2X9;G3V5M4;G3V2E8;G3V380	P12814-2;P12814;P12814-3;P12814-4;H9KV75	Alpha-actinin-1	ACTN1	302.76	5403900000	268	29.5625	28.9363	29.1522	28.7361	28.9081	28.7853
	1.16656	0.343799	P12931;P12931-2;H2E272;H7C3Z8;H7C074;P42685-2;Q9H3Y6;P42685;Q04912-7;Q04912-2;P08581;Q04912;P08581-2	P12931;P12931-2	Proto-oncogene tyrosine-protein kinase Src	SRC	54.22	1062900000	96	26.3535	26.712	26.4553	27.0235	26.731	26.7977
	0.0687971	-0.0205936	P12955;P12955-3;P12955-2;K7ES25;V9GYE4;V9GY89;V9GYL0	P12955;P12955-3;P12955-2	Xaa-Pro dipeptidase	PEPD	154.05	2338100000	111	27.7167	27.8263	27.7602	27.548	27.8524	27.841
	0.724132	-0.147271	P12956;P12956-2;B1AHC9	P12956;P12956-2;B1AHC9	X-ray repair cross-complementing protein 6	XRCC6	323.31	12555000000	360	30.2363	30.4544	30.3598	30.2835	30.0669	30.2582
	0.601514	-0.193434	P13010;C9JZ81;H7C0H9	P13010	X-ray repair cross-complementing protein 5	XRCC5	323.31	12814000000	413	30.2676	30.7096	30.3663	30.1565	30.269	30.3378
	0.0823239	-0.0492547	P13073;H3BN72;H3BNV9;H3BPG0;Q86WV2;H3BNI5	P13073;H3BN72;H3BNV9;H3BPG0	Cytochrome c oxidase subunit 4 isoform 1, mitochondrial	COX4I1	19.306	2525600000	97	27.988	27.9609	27.7815	28.238	27.795	27.5497
	0.109764	0.327332	P13473-2;P13473;P13473-3;H0YCG2	P13473-2;P13473;P13473-3;H0YCG2	Lysosome-associated membrane glycoprotein 2	LAMP2	30.403	574850000	39	26.5319	23.1939	25.8304	24.8247	26.0514	25.6621
	0.581104	-0.318556	P13489;E9PIM9;E9PMJ3;E9PLZ3;H0YCR7;E9PIK5;E9PMN0;E9PMA9;E9PR82;E9PMI1	P13489;E9PIM9	Ribonuclease inhibitor	RNH1	116.77	2784800000	163	28.2873	28.056	28.2169	27.9269	28.2419	27.4356
	0.0347662	-0.0307185	P13611;P13611-2;P13611-5;P13611-3;E9PF17;P13611-4;D6RGZ6;Q86W61	P13611;P13611-2;P13611-5;P13611-3;E9PF17;P13611-4;D6RGZ6;Q86W61	Versican core protein	VCAN	147.84	3853700000	163	29.0447	28.2969	28.1048	28.3688	28.3655	28.62
	1.77071	0.270711	P13639;M0R0I6	P13639	Elongation factor 2	EEF2	323.31	60729000000	736	32.3386	32.2771	32.3734	32.6748	32.4759	32.6506
	0.513778	0.201368	P13667;C9JMN9	P13667	Protein disulfide-isomerase A4	PDIA4	323.31	24369000000	499	31.2088	30.9765	31.1954	31.2999	31.076	31.6089
	0.153429	0.0742512	P13674;P13674-2;P13674-3	P13674;P13674-2;P13674-3	Prolyl 4-hydroxylase subunit alpha-1	P4HA1	323.31	9129800000	314	30.018	29.4345	29.8513	29.8717	29.7431	29.9117
	0.130758	-0.127282	P13797;A0A0A0MSQ0;P13797-2;P13797-3;U3KQI3;H7C4N2;F2Z2Z9	P13797;A0A0A0MSQ0;P13797-2;P13797-3	Plastin-3	PLS3	318.84	6353100000	300	29.9441	28.8015	29.2339	29.0214	29.4542	29.122
	1.06878	0.189831	P13804;P13804-2;H0YLU7;H0YK49;H0YNX6;H0YL12;H0YKF0;H0YL83;H0YM12;J3KN60	P13804;P13804-2;H0YLU7;H0YK49;H0YNX6;H0YL12;H0YKF0	Electron transfer flavoprotein subunit alpha, mitochondrial	ETFA	144.51	5909500000	167	29.0153	29.0394	29.0622	29.3005	29.0645	29.3214
	0.476741	-0.31978	P13807-2;P13807;M0QYU1	P13807-2;P13807	Glycogen [starch] synthase, muscle	GYS1	29.529	386570000	60	25.507	25.4024	25.5174	24.827	25.7314	24.9091
	0.960294	0.378608	P13861-2;P13861;H7C330;H7C1L0;C9J830;H7C4A9	P13861-2;P13861	cAMP-dependent protein kinase type II-alpha regulatory subunit	PRKAR2A	143.19	3373900000	151	28.4566	28.205	28.0186	28.5178	28.4297	28.8686
	0.402769	-0.937701	P13984	P13984	General transcription factor IIF subunit 2	GTF2F2	20.737	409270000	46	25.3603	25.4816	25.5444	25.716	25.2867	22.5704
	0.0378627	-0.0239576	P14174	P14174	Macrophage migration inhibitory factor	MIF	33.204	35219000000	133	31.8139	31.7055	31.2125	31.763	31.4986	31.3985
	0.0450247	-0.0458469	P14209;P14209-3;A8MQT7;A0A096LP69;P14209-2	P14209;P14209-3;A8MQT7;A0A096LP69;P14209-2	CD99 antigen	CD99	97.003	698070000	48	26.4609	25.6014	26.1835	26.3447	25.5668	26.1968
	0.085728	0.0643438	P14324-2;P14324;A0A087WVN4;A0A087X1D8;A0A087X090;A0A087WTP2	P14324-2;P14324;A0A087WVN4;A0A087X1D8	Farnesyl pyrophosphate synthase	FDPS	149.99	7837500000	135	29.278	29.6495	29.6257	29.9736	29.6193	29.1532
	1.17878	-2.03233	P14410	P14410	Sucrase-isomaltase, intestinal;Sucrase;Isomaltase	SI	30.909	160110000	30	26.3254	25.2643	23.6226	23.2519	23.2191	22.6443
	0.356908	0.502724	P14543;P14543-2	P14543;P14543-2	Nidogen-1	NID1	70.135	3748900000	133	27.2385	28.8768	28.834	29.0402	28.3576	29.0597
	0.953453	0.18326	P14550;Q5T621;V9GYG2;V9GYP9	P14550	Alcohol dehydrogenase [NADP(+)]	AKR1A1	209.71	8689600000	201	29.6345	29.6757	29.6906	29.8878	29.6818	29.981
	0.0151113	-0.00680669	P14618;B4DNK4;P14618-3	P14618;B4DNK4;P14618-3	Pyruvate kinase PKM;Pyruvate kinase	PKM	323.31	90034000000	660	32.9342	33.2121	33.0389	32.8649	33.2914	33.0084
	1.05267	1.06307	P14618-2;H3BTN5;H3BR70;H3BQ34;H3BUW1;H3BTJ2;H3BT25;H3BU13;H3BN34;H3BQZ3;P30613-2;P30613	P14618-2;H3BTN5;H3BR70	Pyruvate kinase PKM;Pyruvate kinase	PKM	53.86	1475900000	64	25.7957	26.9828	26.58	27.1393	27.252	28.1565
	0.242748	-0.0553487	P14625;Q96GW1;A0A1W2PRR1;H0YIV0;Q58FF3;F8W026	P14625	Endoplasmin	HSP90B1	323.31	98182000000	795	33.355	33.0907	33.2396	33.2494	33.0861	33.1837
	0.0238956	-0.00890732	P14649;F8W1I5;F8VSA2	P14649;F8W1I5	Myosin light chain 6B	MYL6B	27.134	4136200000	68	28.612	28.625	28.7962	28.7014	28.4648	28.8403
	0.254331	0.689887	P14854;K7EQD3	P14854	Cytochrome c oxidase subunit 6B1	COX6B1	19.432	695080000	35	23.1531	26.1721	26.1966	26.411	26.0308	25.1496
	0.429499	0.402288	P14866;M0QXS5;A0A3B3ITJ4;P14866-2;M0R1W6;B4DVF8;M0QYL7	P14866;M0QXS5;A0A3B3ITJ4;P14866-2	Heterogeneous nuclear ribonucleoprotein L	HNRNPL	323.31	9770300000	317	28.8963	29.9143	29.9541	30.3512	29.655	29.9653
	0.473516	0.223553	P14868;P14868-2;C9J7S3;C9JLC1;H7BZ35;H7C278;C9JQM9	P14868;P14868-2	Aspartate--tRNA ligase, cytoplasmic	DARS	177.81	5911400000	248	28.8924	29.0828	29.2527	29.3629	28.9675	29.5681
	0.921752	-0.412052	P14923;C9JK18;C9JKY1;C9JTX4;C9J826;C9JPI2;K7ERP3	P14923	Junction plakoglobin	JUP	94.089	1113300000	101	27.1591	26.8391	27.0255	26.9654	26.4615	26.3606
	0.759319	0.34708	P14927;B7Z2R2;P14927-2;E5RHG9	P14927;B7Z2R2;P14927-2	Cytochrome b-c1 complex subunit 7	UQCRB	26.209	1381700000	58	26.6712	27.1773	26.5401	27.2963	27.1085	27.025
	0.756006	0.300302	P15121;E9PCX2;E9PEF9	P15121;E9PCX2	Aldose reductase	AKR1B1	222.47	7623400000	203	29.2367	29.3753	29.3375	29.7051	29.2743	29.8711
	1.3776	-1.03829	P15144;H0YLZ8	P15144	Aminopeptidase N	ANPEP	8.3561	67307000	9	24.3794	24.4648	23.7944	22.6897	23.1684	23.6657
	1.19008	0.297703	P15170-2;P15170-3;P15170;H3BR35;H3BSV8	P15170-2;P15170-3;P15170;H3BR35	Eukaryotic peptide chain release factor GTP-binding subunit ERF3A	GSPT1	119.12	2677600000	158	27.7976	27.8744	27.7406	28.1557	27.8884	28.2616
	0.251315	0.206436	P15374;A0A087WTB8;Q5TBK7	P15374;A0A087WTB8;Q5TBK7	Ubiquitin carboxyl-terminal hydrolase isozyme L3;Ubiquitin carboxyl-terminal hydrolase	UCHL3	32.36	579540000	58	25.6303	25.2975	26.0776	26.136	25.4068	26.0819
	0.526379	0.333439	P15531;P15531-2	P15531;P15531-2	Nucleoside diphosphate kinase A	NME1	36.8	2262000000	21	27.2753	27.7886	27.8533	28.2756	27.5683	28.0736
	0.551881	-0.0566858	P15880;H0YEN5;E9PMM9;E9PQD7;I3L404;E9PPT0;E9PM36;H3BNG3;H0YE27	P15880;H0YEN5;E9PMM9;E9PQD7;I3L404;E9PPT0;E9PM36	40S ribosomal protein S2	RPS2	145.99	10408000000	140	29.9995	30.0642	30.0067	30.0445	29.9076	29.9482
	1.04276	0.385074	P15882-3;P15882;C9J3G1;F8W6K2;B8ZZ96;P15882-2;F8WCQ9;F8WAY4;C9J3V9;C9JR98	P15882-3;P15882;C9J3G1;F8W6K2;B8ZZ96;P15882-2	N-chimaerin	CHN1	9.9715	61701000	14	23.4373	23.0707	23.2639	23.4935	23.9169	23.5168
	1.05067	-0.374451	P15927;P15927-2;P15927-3;Q5TEJ7;Q5TEJ0	P15927;P15927-2;P15927-3;Q5TEJ7	Replication protein A 32 kDa subunit	RPA2	65.055	1821300000	70	27.3188	27.7517	27.8285	27.3654	27.1979	27.2123
	0.475958	-0.353418	Q5TD07;P16083;Q5TD05;A2A2U4	Q5TD07;P16083;Q5TD05	Ribosyldihydronicotinamide dehydrogenase [quinone]	NQO2	17.72	557430000	36	26.1932	25.8469	25.8321	25.1633	26.1764	25.4723
	0.0898315	0.0501836	P16152;E9PQ63;A8MTM1;P16152-2	P16152;E9PQ63;A8MTM1;P16152-2	Carbonyl reductase [NADPH] 1	CBR1	69.593	1516500000	102	26.895	26.8251	27.0549	27.1922	27.1301	26.6033
	1.07588	-0.522181	P16278-3;P16278;E7EQ29;P16278-2;C9J539;C9J4G9;F8WF40;C9JF15;C9JWX1	P16278-3;P16278;E7EQ29;P16278-2	Beta-galactosidase	GLB1	46.149	1600800000	113	27.5496	27.6823	27.4927	26.6186	27.3431	27.1964
	3.09432	0.791919	P16298;P16298-4;P16298-3;Q5F2F8;P16298-2;Q5F2G0	P16298;P16298-4;P16298-3;Q5F2F8;P16298-2	Serine/threonine-protein phosphatase 2B catalytic subunit beta isoform;Serine/threonine-protein phosphatase	PPP3CB	40.473	1344800000	93	26.5789	26.4405	26.4892	27.4025	27.1459	27.3359
	0.0213864	0.0303682	P16333;P16333-2;C9JAB9;C9JVV5;C9J869;C9J0K5;C9K098;H7C5C7	P16333;P16333-2;C9JAB9	Cytoplasmic protein NCK1	NCK1	11.944	176910000	29	23.8072	23.6792	24.9745	23.9409	24.6506	23.9605
	0.403735	0.295755	P16401	P16401	Histone H1.5	HIST1H1B	36.304	1121900000	30	26.8028	26.1014	26.6267	27.1041	26.3581	26.9559
	1.88192	0.234247	P16435;H0Y4R2;E7EMD0;E7EWU0;C9JU80	P16435;H0Y4R2;E7EMD0	NADPH--cytochrome P450 reductase	POR	138.32	2766500000	171	27.8249	27.9425	27.8966	28.0708	28.0879	28.208
	1.06828	0.24062	P16615;P16615-5;P16615-2;P16615-3;P16615-4;H7C5W9;O14983-2;O14983;O14983-3;H3BVB2;A0A0C4DH86;J3QSY6;H3BTW4	P16615;P16615-5;P16615-2;P16615-3;P16615-4;H7C5W9	Sarcoplasmic/endoplasmic reticulum calcium ATPase 2	ATP2A2	190.26	5856700000	266	29.0751	28.9938	29.0353	29.4019	29.0708	29.3532
	0.124875	0.20295	P16870-2;P16870;D6RF88;C9JE88;D6R930	P16870-2;P16870	Carboxypeptidase E	CPE	17.701	189850000	29	23.2228	24.6803	24.8789	25.0245	24.2699	24.0964
	0.21766	0.191054	P16930;P16930-2;H0YLC7;H3BNP8	P16930;P16930-2;H0YLC7	Fumarylacetoacetase	FAH	45.147	770490000	68	26.5839	25.808	26.1112	25.8677	26.7321	26.4766
	0.163671	0.132483	P16949;P16949-2;A2A2D0	P16949;P16949-2;A2A2D0	Stathmin	STMN1	14.416	20861000000	76	30.5255	31.1288	30.8162	31.4078	30.915	30.5453
	1.35761	-0.64938	P17050	P17050	Alpha-N-acetylgalactosaminidase	NAGA	91.178	1084700000	64	27.1363	26.8108	27.2472	26.2201	26.7773	26.2487
	0.440525	0.433721	P17066;P48741	P17066;P48741	Heat shock 70 kDa protein 6;Putative heat shock 70 kDa protein 7	HSPA6;HSPA7	7.3128	4276800000	23	27.7204	28.2735	28.8714	29.2133	28.3241	28.6291
	3.40097	0.24811	P17174;P17174-2	P17174;P17174-2	Aspartate aminotransferase, cytoplasmic	GOT1	177.02	5464900000	185	28.9225	28.9542	28.887	29.1766	29.1464	29.185
	1.38618	0.670591	P17252;J3KRN5;P05771;P05771-2;H3BV73;M0R0I9;P05129-2;P05129	P17252;J3KRN5	Protein kinase C alpha type	PRKCA	47.363	577540000	61	25.5382	25.3704	24.9059	25.8044	25.8339	26.1879
	0.713062	1.28503	P17301;D6RG08	P17301	Integrin alpha-2	ITGA2	32.541	321040000	53	22.6792	23.5457	25.2377	25.5855	24.4562	25.276
	0.697366	0.932102	P17600;P17600-2;A0A1W2PS00;A0A087WW91	P17600;P17600-2	Synapsin-1	SYN1	23.642	144030000	35	22.8106	22.4972	23.2135	24.8683	22.9352	23.514
	0.553227	0.246313	P17612-2;P17612;Q15136;K7ERP6	P17612-2;P17612;Q15136;K7ERP6	cAMP-dependent protein kinase catalytic subunit alpha	PRKACA;KIN27	15.421	522090000	27	25.5691	25.7011	25.7258	25.6923	25.7502	26.2924
	0.412153	-0.222928	P17655;P17655-2;C9JWY7	P17655;P17655-2	Calpain-2 catalytic subunit	CAPN2	167.74	2560500000	176	28.4792	28.1505	27.7119	27.7889	27.8913	27.9926
	0.335253	0.171532	P17812;A0A3B3IRI2;A0A3B3IRQ8;A0A3B3ITF6;B4E1E0;P17812-2;A0A3B3ITB8;A0A3B3ISY3;A0A3B3ITH9	P17812;A0A3B3IRI2;A0A3B3IRQ8;A0A3B3ITF6;B4E1E0;P17812-2;A0A3B3ITB8	CTP synthase 1;CTP synthase	CTPS1	80.064	1609000000	113	26.9342	27.3565	27.2788	27.6648	27.3285	27.0907
	0.140619	-0.0339006	P17858;P17858-2;F8WEU2	P17858;P17858-2	ATP-dependent 6-phosphofructokinase, liver type	PFKL	292.35	4623800000	276	28.9709	28.7588	28.7201	28.7647	28.8653	28.7181
	1.01566	-0.482377	P17900;H0YBY3;E5RJD0	P17900	Ganglioside GM2 activator;Ganglioside GM2 activator isoform short	GM2A	26.494	560390000	29	26.5053	26.1046	25.8581	25.4938	25.8982	25.6288
	1.65648	-1.28291	P17931;G3V3R6	P17931;G3V3R6	Galectin-3;Galectin	LGALS3	28.078	1587900000	59	28.0615	28.0211	27.9766	27.1298	27.0464	26.0344
	1.60266	0.2831	P17987;E7EQR6;E7ERF2;F5H282;F5GZ03;F5GZI8;F5H136;F5H676;F5GYL4;F5H726;F5H7Y1	P17987;E7EQR6;E7ERF2;F5H282	T-complex protein 1 subunit alpha	TCP1	323.31	22209000000	500	30.9276	30.8192	30.9222	31.2472	31.027	31.244
	0.430408	0.531115	P18031;B4DSN5	P18031;B4DSN5	Tyrosine-protein phosphatase non-receptor type 1;Tyrosine-protein phosphatase non-receptor type	PTPN1	23.162	212120000	32	22.88	24.3163	24.4491	24.3773	24.7092	24.1523
	0.406168	0.277074	P18077;F8WBS5;F8WB72;C9K025	P18077;F8WBS5;F8WB72;C9K025	60S ribosomal protein L35a	RPL35A	10.05	1089800000	32	26.3148	26.9878	26.6214	27.3371	26.6306	26.7876
	0.659738	0.148579	P18085;C9JAK5;U3KQF2;C9JPM4	P18085;C9JAK5;U3KQF2;C9JPM4	ADP-ribosylation factor 4	ARF4	119.49	11093000000	119	30.1898	29.8692	30.0079	30.2455	30.1678	30.0992
	0.403871	-0.180279	P18124;A8MUD9;C9JIJ5;C9JZ88	P18124;A8MUD9	60S ribosomal protein L7	RPL7	37.952	8391100000	136	29.6845	29.6511	29.8621	29.822	29.2176	29.6173
	0.185894	-0.0756652	P18206-2;P18206;P18206-3;A0A096LPE1	P18206-2;P18206	Vinculin	VCL	323.31	12979000000	471	30.5405	30.1847	30.3234	30.2519	30.085	30.4846
	0.334536	0.600725	P18583-2;P18583-7;P18583;P18583-5;P18583-9;P18583-10;P18583-4;P18583-3;P18583-6;H7C1M2;J3QSZ5;P18583-8;H7C2G8;H7C1S4;H7C257	P18583-2;P18583-7;P18583;P18583-5;P18583-9;P18583-10;P18583-4;P18583-3;P18583-6;H7C1M2;J3QSZ5	Protein SON	SON	59.479	599380000	83	23.8396	26.0699	26.0094	25.8689	26.1013	25.751
	0.765263	0.156128	P18669;P15259;Q8N0Y7	P18669	Phosphoglycerate mutase 1	PGAM1	323.31	19072000000	264	30.7702	30.7021	30.7836	31.0224	30.7296	30.9723
	1.51324	-0.700712	P18754;P18754-2;C9JW69;C9JRH2;C9J3R0;C9JMJ4;C9JQZ4	P18754;P18754-2;C9JW69;C9JRH2;C9J3R0;C9JMJ4;C9JQZ4	Regulator of chromosome condensation	RCC1	47.737	285920000	34	25.4303	25.1678	25.2446	24.7216	24.8323	24.1867
	0.399584	-0.148361	P18859;P18859-2;A8MUH2	P18859;P18859-2;A8MUH2	ATP synthase-coupling factor 6, mitochondrial	ATP5J	34.459	1491700000	59	27.2507	27.0159	27.2923	26.7778	27.1349	27.2011
	0.116153	-0.0898711	P19022-2;P19022;C9J8J8;C9J126;A0A0G2JRA4;A0A087WX99;P55283-2;P55283	P19022-2;P19022	Cadherin-2	CDH2	142.56	1790600000	111	27.0475	27.784	27.6464	27.0799	27.6405	27.4878
	0.129156	0.0854212	P19174;P19174-2;V9GY63;V9GY71;V9GYH5;A0A0D9SEK2;M0QX77	P19174;P19174-2	1-phosphatidylinositol 4,5-bisphosphate phosphodiesterase gamma-1	PLCG1	107.3	691400000	115	25.7256	26.4897	26.2076	26.4089	26.1863	26.0839
	0.90639	-0.422555	P19338;H7BY16;C9JYW2;C9JLB1;C9J1H7;C9JWL1	P19338;H7BY16	Nucleolin	NCL	323.31	15685000000	209	31.0236	30.8754	30.4364	30.3964	30.5536	30.1177
	2.30538	0.748447	P19367;P19367-4;P19367-2;P19367-3;B1AR63;B1AR62;Q2TB90;A0A2R8Y626;Q2TB90-2;Q2TB90-3	P19367;P19367-4;P19367-2;P19367-3	Hexokinase-1	HK1	205.06	6774800000	286	28.6022	28.8637	28.9211	29.3651	29.654	29.6132
	0.49762	-0.23827	P19525-2;P19525;F8WBH4;C9JZT2	P19525-2;P19525	Interferon-induced, double-stranded RNA-activated protein kinase	EIF2AK2	23.358	485500000	49	25.9143	25.6542	25.5593	25.4988	25.7681	25.1461
	0.568037	-0.412192	P19623;K7EQ47;K7EKM4;K7EL89;K7ESL0	P19623	Spermidine synthase	SRM	74.293	1034600000	79	27.3818	26.6341	26.7512	26.2787	26.9578	26.294
	0.297573	-0.17803	P19784;H3BSA1;H3BV19;H3BNI9	P19784;H3BSA1	Casein kinase II subunit alpha	CSNK2A2	26.625	368740000	56	25.6471	25.2152	24.891	24.8795	25.2392	25.1005
	0.615922	-0.280428	P20020-6;P20020;P20020-4;P20020-1;P20020-5;P20020-2;E7ERY9;A0A0U1RQU3;F8W1V5	P20020-6;P20020;P20020-4;P20020-1;P20020-5;P20020-2;E7ERY9	Plasma membrane calcium-transporting ATPase 1;Calcium-transporting ATPase	ATP2B1	42.939	453160000	51	25.7851	25.6627	25.6642	25.0385	25.52	25.7124
	2.03592	0.600437	P20042	P20042	Eukaryotic translation initiation factor 2 subunit 2	EIF2S2	138.08	708300000	102	25.7527	25.8006	25.8031	26.298	26.2248	26.6349
	1.2782	0.26132	P20073-2;P20073	P20073-2;P20073	Annexin A7	ANXA7	22.109	434390000	48	25.4502	25.2549	25.2352	25.6502	25.4412	25.633
	2.20511	-0.750264	P20290-2;P20290;H0Y9Y1;D6RDG3	P20290-2;P20290	Transcription factor BTF3	BTF3	132.93	1021800000	65	26.887	27.2515	27.079	26.4451	26.3888	26.1329
	1.80073	0.899275	P20336;S4R3Q3;M0R257	P20336;S4R3Q3	Ras-related protein Rab-3A	RAB3A	76.158	1057700000	47	25.822	26.1578	26.2827	27.0082	26.6714	27.2807
	1.94293	1.17759	P20337	P20337	Ras-related protein Rab-3B	RAB3B	12.227	154470000	21	23.6971	23.4332	22.9818	24.8342	24.2651	24.5456
	0.00482723	0.00998561	P20338;A0A087WYT5	P20338	Ras-related protein Rab-4A	RAB4A	31.835	186430000	26	24.3144	22.9025	25.082	23.7869	24.5482	23.9939
	0.0555209	0.039053	P20339-2;P20339;F8VWU4;F8WCY6;F8WD79;F8VPW9;F8VSF8;F8VWZ7;A0A1B0GWA9;A0A1B0GVC3	P20339-2;P20339	Ras-related protein Rab-5A	RAB5A	50.022	981950000	50	26.4937	26.7991	26.3	26.3592	26.9585	26.3922
	0.0251795	-0.0127697	P20618	P20618	Proteasome subunit beta type-1	PSMB1	161.69	6518400000	127	29.2832	29.5285	29.1053	29.0581	29.4093	29.4113
	0.969027	-1.18148	P20645;F5GX30;H0YF90;F5GXE0;H0YGE9;F5GXU0;H0YGT2;F5H883	P20645;F5GX30;H0YF90	Cation-dependent mannose-6-phosphate receptor	M6PR	13.201	179860000	24	24.8099	24.2004	24.3564	23.6493	23.9655	22.2074
	1.09055	-0.554708	P20674;H3BNX8;H3BRM5;H3BV69;H3BRI0	P20674;H3BNX8;H3BRM5;H3BV69	Cytochrome c oxidase subunit 5A, mitochondrial	COX5A	22.524	2326800000	59	28.1033	27.8739	28.024	27.4402	27.8459	27.051
	0.549199	0.417074	P20700;E9PBF6;A0A0D9SFE5;A0A0D9SFY5	P20700;E9PBF6;A0A0D9SFE5	Lamin-B1	LMNB1	323.31	36665000000	633	31.0316	31.8444	31.746	32.1698	31.5227	32.1807
	0.227693	-0.339553	Q5TBF5;P20774	Q5TBF5;P20774	Mimecan	OGN	36.664	77794000	11	24.3432	23.7958	23.5411	24.3156	23.8203	22.5256
	0.577131	-0.699479	P20908;P20908-2;H7BY82	P20908;P20908-2	Collagen alpha-1(V) chain	COL5A1	323.31	2732800000	130	29.111	27.5787	28.2864	27.4335	28.2304	27.2138
	0.702447	-0.479771	P21266;A0A0A0MTN3	P21266;A0A0A0MTN3	Glutathione S-transferase Mu 3	GSTM3	193.64	4164400000	118	29.3727	28.6203	28.5919	28.2713	28.7302	28.144
	1.61781	0.416325	P21281;H0YC04;C9JL73;P15313;E5RGH6;C9JNS9;H0YAT8;H0YC45;C9JZ02	P21281	V-type proton ATPase subunit B, brain isoform	ATP6V1B2	223.73	4472300000	239	28.5006	28.7042	28.6191	29.0585	28.8332	29.1811
	1.62422	0.506915	P21283;E7EV59	P21283;E7EV59	V-type proton ATPase subunit C 1	ATP6V1C1	47.439	891270000	89	26.29	26.3162	26.0258	26.72	26.5285	26.9043
	0.0541432	0.0316957	P21333-2;P21333;Q60FE5;A0A087WWY3;F8WE98;H0Y5C6;H0Y5F3;H7C2E7	P21333-2;P21333;Q60FE5;A0A087WWY3	Filamin-A	FLNA	323.31	49684000000	1420	32.6089	31.998	32.1291	32.3128	32.126	32.3923
	1.21281	-0.330868	P21399	P21399	Cytoplasmic aconitate hydratase	ACO1	201.48	3609500000	250	28.6793	28.6202	28.6443	28.1502	28.2346	28.5664
	0.448103	0.352475	P21796;C9JI87	P21796;C9JI87	Voltage-dependent anion-selective channel protein 1	VDAC1	323.31	20064000000	292	29.8814	30.8418	30.8557	30.7063	31.0606	30.8695
	0.306987	0.141776	P21912;A0A087WWT1;A0A087WXX8	P21912;A0A087WWT1;A0A087WXX8	Succinate dehydrogenase [ubiquinone] iron-sulfur subunit, mitochondrial	SDHB	17.563	683060000	43	26.2394	25.9319	25.6961	26.0931	26.2788	25.9208
	0.208658	0.182694	P21964-2;P21964;E7EMS6;E7EUU8;F8WBW9;H7BZ45	P21964-2;P21964;E7EMS6;E7EUU8;F8WBW9	Catechol O-methyltransferase	COMT	53.732	871940000	75	26.4032	26.0564	26.0469	25.8024	26.9042	26.348
	0.834516	0.181033	P22033	P22033	Methylmalonyl-CoA mutase, mitochondrial	MUT	153.09	1145500000	102	26.4798	26.7007	26.7025	26.9164	26.8276	26.6822
	0.60137	-0.131035	P22059;H0YCV6;H7C1R2;H7C368;H7C428;A0A0A0MSB4;Q6ZN50;Q969R2-5;Q969R2-4;Q969R2-6;Q969R2-3;Q969R2-2;Q969R2	P22059	Oxysterol-binding protein 1	OSBP	71.005	1172800000	120	27.0894	26.764	26.9246	26.7884	26.8434	26.753
	0.375644	-0.0976702	P22102;P22102-2;F8WD69;C9JBJ1;C9JTV6;C9JZG2;C9JKQ7;H7C366;A0A140TA71	P22102;P22102-2	Trifunctional purine biosynthetic protein adenosine-3;Phosphoribosylamine--glycine ligase;Phosphoribosylformylglycinamidine cyclo-ligase;Phosphoribosylglycinamide formyltransferase	GART	188.84	3905300000	217	28.5841	28.6253	28.6784	28.6515	28.6222	28.3211
	0.0907588	0.0272732	P22234;P22234-2;E9PBS1;D6RF62	P22234;P22234-2;E9PBS1;D6RF62	Multifunctional protein ADE2;Phosphoribosylaminoimidazole-succinocarboxamide synthase;Phosphoribosylaminoimidazole carboxylase	PAICS	281.17	14740000000	313	30.352	30.6777	30.4657	30.4328	30.5961	30.5483
	0.243229	0.123894	P22307-8;P22307;P22307-4;P22307-7;P22307-6;P22307-2;H0YF61;E9PLD1;H0YCB0;P22307-3	P22307-8;P22307;P22307-4;P22307-7;P22307-6;P22307-2	Non-specific lipid-transfer protein	SCP2	94.276	2598200000	94	27.841	28.0513	28.1371	28.3927	27.7856	28.2228
	1.36496	0.159816	P22314-2;P22314;Q5JRR6;Q5JRR9;Q5JRS0;Q5JRS1;Q5JRS3;Q5JRS2	P22314-2;P22314	Ubiquitin-like modifier-activating enzyme 1	UBA1	323.31	42247000000	712	31.8553	31.9391	32.0155	32.1517	32.0851	32.0526
	0.459313	0.19788	Q32Q12;P22392-2;J3KPD9;P22392;E7ERL0;O60361;F6XY72;E5RHP0;C9K028	Q32Q12;P22392-2;J3KPD9;P22392;E7ERL0;O60361	Nucleoside diphosphate kinase;Nucleoside diphosphate kinase B;Putative nucleoside diphosphate kinase	NME1-NME2;NME2;NME1;NME2P1	67.217	18526000000	212	30.6841	30.6372	30.8078	31.1115	30.5511	31.0601
	0.438357	0.460286	P22626;P22626-2;A0A087WUI2	P22626;P22626-2;A0A087WUI2	Heterogeneous nuclear ribonucleoproteins A2/B1	HNRNPA2B1	323.31	41208000000	471	30.8672	32.1008	31.888	32.3272	31.5982	32.3113
	1.16722	0.525454	P22694-5;P22694-7;A0A0A0MS54;P22694-4;P22694-3;P22694;P22694-6;P22694-9;P22694-2;A0A087WVC4;P22694-10;B1APG0;B1APG2;B1APF8;B1APF9;B1APG3;P22694-8;B1APF7;B1APG1	P22694-5;P22694-7;A0A0A0MS54;P22694-4;P22694-3;P22694;P22694-6;P22694-9;P22694-2;A0A087WVC4;P22694-10;B1APG0;B1APG2;B1APF8;B1APF9;B1APG3;P22694-8;B1APF7;B1APG1	cAMP-dependent protein kinase catalytic subunit beta	PRKACB	53.363	2903900000	126	27.8294	28.0595	27.8559	28.4383	28.097	28.7857
	1.22882	0.458494	P22695;H3BRG4;H3BSJ9;H3BP04;H3BUE4;H3BUI9;A0A087WVZ4	P22695;H3BRG4;H3BSJ9;H3BP04	Cytochrome b-c1 complex subunit 2, mitochondrial	UQCRC2	133.88	3681500000	162	27.8463	28.2173	28.2216	28.8002	28.4192	28.4414
	0.638034	-0.712867	P23142;CON__ENSEMBL:ENSBTAP00000016046	P23142	Fibulin-1	FBLN1	26.749	939670000	25	27.1494	26.6175	26.7204	25.2431	26.8854	26.2202
	0.393819	0.538263	P23246;P23246-2;H0Y9K7;H0Y9U2	P23246;P23246-2	Splicing factor, proline- and glutamine-rich	SFPQ	279.34	9215300000	269	28.5216	29.7376	29.7045	30.1424	29.0402	30.3959
	0.0732312	-0.0367686	P23258;Q9NRH3;K7EIS0;K7EKE5	P23258;Q9NRH3	Tubulin gamma-1 chain;Tubulin gamma-2 chain	TUBG1;TUBG2	74.233	741650000	79	26.227	26.251	26.1826	25.8476	26.4365	26.2662
	0.177666	-0.0717659	P23284	P23284	Peptidyl-prolyl cis-trans isomerase B	PPIB	87.767	13034000000	141	30.4203	30.165	30.4667	30.3284	30.4599	30.0483
	0.926831	1.20616	P23297;Q5T7Y5;Q5T7Y4;Q5T7Y6	P23297;Q5T7Y5;Q5T7Y4;Q5T7Y6	Protein S100-A1;Protein S100	S100A1	20.552	173980000	17	22.4695	23.9282	24.0773	24.4528	25.3451	24.2957
	0.0375817	-0.029295	P23378;A0A1W2PP74;A0A1W2PQV3;A0A1W2PPB1;A0A1W2PQU6;A0A1W2PPE1;A0A1W2PPK8;A0A1W2PPH6	P23378	Glycine dehydrogenase (decarboxylating), mitochondrial	GLDC	52.031	737260000	81	25.5911	26.4442	26.2062	26.0523	26.1767	25.9247
	0.408229	-0.300443	P23381;P23381-2;G3V3H8;G3V3Y5;G3V277;G3V423;G3V5U1;G3V456;G3V3P2;G3V227;G3V2Y7;H0YJP3;G3V4C7;G3V4N8;G3V5W1;G3V3S7;G3V3X0;G3V2F2;G3V3R3;G3V4S4;G3V313;G3V339;G3V2C0;G3V5H5;P78534;G3V4A3;G3V4Q0;G3V4N0	P23381;P23381-2;G3V3H8;G3V3Y5	Tryptophan--tRNA ligase, cytoplasmic;T1-TrpRS;T2-TrpRS	WARS	323.31	6630300000	251	30.0214	29.0284	29.4131	29.179	29.3963	28.9862
	0.16009	-0.113686	P23396;P23396-2;E9PL09;F2Z2S8;H0YCJ7;E9PPU1;H0YF32;H0YEU2	P23396;P23396-2;E9PL09;F2Z2S8;H0YCJ7;E9PPU1;H0YF32;H0YEU2	40S ribosomal protein S3	RPS3	88.422	10660000000	161	29.8308	29.9848	30.1829	30.3427	29.817	29.4978
	1.01322	0.337304	P23526;P23526-2	P23526;P23526-2	Adenosylhomocysteinase	AHCY	147.39	13293000000	172	30.0445	30.0674	30.1965	30.7	30.1842	30.4361
	1.68628	0.380934	P23528;G3V1A4;E9PK25;E9PP50;E9PQB7;E9PLJ3;E9PS23	P23528;G3V1A4;E9PK25;E9PP50;E9PQB7;E9PLJ3	Cofilin-1	CFL1	141.47	58295000000	250	32.1423	32.3351	32.1656	32.7243	32.4412	32.6202
	0.051087	0.0257696	P23634-7;P23634-6;P23634-8;P23634;P23634-5;P23634-4;P23634-3;P23634-2;H0YDG5;H7BZS8;H7BY13	P23634-7;P23634-6;P23634-8;P23634;P23634-5;P23634-4;P23634-3;P23634-2	Plasma membrane calcium-transporting ATPase 4	ATP2B4	237.62	3302600000	228	28.5943	28.1177	28.1732	28.4928	28.2415	28.2281
	0.473059	-0.254183	P23921;E9PL69;E9PP77;H0YCY7	P23921;E9PL69	Ribonucleoside-diphosphate reductase large subunit	RRM1	164.02	2061300000	149	27.434	27.9666	27.9264	27.7521	27.593	27.2194
	0.124839	-0.0585931	P24534;F2Z2G2;C9JZW3;F8WF65	P24534	Elongation factor 1-beta	EEF1B2	102.08	4537700000	95	28.7961	28.8507	28.8451	28.7891	29.0591	28.4679
	1.10264	0.407257	P24539;Q5QNZ2	P24539;Q5QNZ2	ATP synthase F(0) complex subunit B1, mitochondrial	ATP5F1	317.26	7340500000	160	29.1461	29.2661	29.0563	29.6788	29.2422	29.7692
	0.0825479	0.0567519	P24593;C9JXX4	P24593;C9JXX4	Insulin-like growth factor-binding protein 5	IGFBP5	7.7967	288130000	23	24.5069	24.3648	24.9009	24.9016	24.293	24.7483
	0.734423	0.376012	P24666;G5E9R5;P24666-4;P24666-3;F2Z2Q9	P24666;G5E9R5;P24666-4;P24666-3	Low molecular weight phosphotyrosine protein phosphatase	ACP1	92.708	2592000000	116	27.7503	27.9846	27.8051	28.34	27.7901	28.538
	1.18497	0.340178	P24752;H0YEL7;P24752-2;E9PRQ6;E9PKF3	P24752	Acetyl-CoA acetyltransferase, mitochondrial	ACAT1	226.04	3523300000	175	27.9077	28.0096	28.1766	28.5167	28.1561	28.4416
	1.09725	-0.459783	P24928;P24928-2	P24928	DNA-directed RNA polymerase II subunit RPB1	POLR2A	76.204	421330000	78	25.5169	25.6857	25.5414	25.493	25.0044	24.8674
	0.812159	0.713865	P25098;E9PRV7;P35626;Q8N433	P25098;E9PRV7	Beta-adrenergic receptor kinase 1	ADRBK1	9.9302	74015000	18	22.7685	22.6872	23.8614	24.0649	23.551	23.8428
	0.685747	-1.62304	P25205;P25205-2;J3KQ69;Q7Z6P5	P25205;P25205-2;J3KQ69	DNA replication licensing factor MCM3	MCM3	153.28	811990000	102	26.8193	27.083	26.5717	25.8693	26.6223	23.1134
	0.00829437	0.0145473	P25208;F8VSL3	P25208;F8VSL3	Nuclear transcription factor Y subunit beta	NFYB	12.899	128960000	12	23.3207	24.4373	23.0932	23.4504	23.0472	24.3971
	1.12763	-0.613397	P25325;P25325-2;B1AH49	P25325;P25325-2;B1AH49	3-mercaptopyruvate sulfurtransferase;Sulfurtransferase	MPST	51.184	1031200000	70	27.4017	26.7591	26.6852	26.1019	26.4382	26.4658
	0.394971	0.209433	P25398	P25398	40S ribosomal protein S12	RPS12	114.67	6181100000	96	29.0112	29.0994	29.3598	29.5383	28.9712	29.5892
	0.424174	0.178003	P25685;P25685-2;M0R080;M0QYT3;M0QXK0;M0R1D6;M0QZD0;M0R128;A0A1B0GX60	P25685;P25685-2;M0R080	DnaJ homolog subfamily B member 1	DNAJB1	74.684	1034500000	106	26.5836	26.39	26.7261	26.8406	26.4499	26.9432
	0.99152	0.454795	P25686;C9JRD2;P25686-2;C9JXB9;C9J1G2;E7ETU0;C9JX00	P25686;C9JRD2;P25686-2;C9JXB9	DnaJ homolog subfamily B member 2	DNAJB2	13.489	81195000	20	23.0214	23.6206	23.1153	23.6856	23.5321	23.904
	0.374284	0.0715853	P25705;P25705-2;P25705-3;K7EK77;K7ERX7;K7ENJ4;K7EJP1;K7EQH4;K7ESA0	P25705;P25705-2;P25705-3	ATP synthase subunit alpha, mitochondrial	ATP5A1	323.31	55535000000	548	32.4431	32.2081	32.3141	32.4253	32.4457	32.309
	0.809346	0.425238	P25786;P25786-2;F5GX11;B4DEV8	P25786;P25786-2;F5GX11	Proteasome subunit alpha type-1	PSMA1	131.97	6793700000	156	28.9635	29.2868	29.1936	29.6765	29.1453	29.8978
	0.178621	0.076889	P25788-2;P25788;G3V4X5;G3V3W4;G3V5N4;H0YJ03	P25788-2;P25788;G3V4X5	Proteasome subunit alpha type-3	PSMA3	70.432	6397300000	112	29.0312	29.2629	29.2052	29.5387	29.1133	29.078
	0.986021	0.146736	P25789;H0YL69;H0YMZ1;H0YMA1;H0YN18;H0YLC2;H0YMI6;P25789-2;H0YKT8;H0YKS0;H0YLS6;H0YMV3	P25789;H0YL69;H0YMZ1;H0YMA1;H0YN18;H0YLC2;H0YMI6;P25789-2;H0YKT8	Proteasome subunit alpha type-4;Proteasome subunit alpha type;Proteasome subunit beta type	PSMA4	123.67	5964200000	149	28.9658	29.0923	29.1421	29.1897	29.1484	29.3023
	0.963641	0.3354	P26038	P26038	Moesin	MSN	323.31	27928000000	490	31.2941	31.2124	31.2854	31.6685	31.2926	31.837
	0.567288	-0.160158	P26196;Q8IV96	P26196	Probable ATP-dependent RNA helicase DDX6	DDX6	268.14	2937300000	204	28.4136	28.2375	28.1327	27.974	28.287	28.0423
	0.418372	0.483777	P26232-2;P26232-5;P26232;P26232-3;P26232-4;P26232-6;A0A0A0MRI5;A0A0A0MTJ6;B9A010;C9IZ88;C9J144	P26232-2;P26232-5;P26232;P26232-3;P26232-4;P26232-6;A0A0A0MRI5	Catenin alpha-2	CTNNA2	145.35	1217400000	126	25.5946	27.2344	26.7617	27.001	26.897	27.144
	2.13109	-1.08169	P26358;P26358-2;P26358-3;K7ENW7;K7EP77;K7EMU8;K7EJL0	P26358;P26358-2;P26358-3	DNA (cytosine-5)-methyltransferase 1	DNMT1	34.348	146100000	36	24.0986	24.8052	24.4757	23.2492	23.4862	23.3991
	0.421716	-0.231546	P26368-2;P26368;K7ENG2;K7ELP8	P26368-2;P26368;K7ENG2	Splicing factor U2AF 65 kDa subunit	U2AF2	116.1	3980500000	169	28.304	29.0094	28.8268	28.2933	28.6374	28.5148
	0.243003	0.164683	P26373;P26373-2;J3QSB4;H3BTH3	P26373;P26373-2;J3QSB4	60S ribosomal protein L13	RPL13	51.703	4322300000	71	28.6603	28.5883	28.8779	29.1837	28.3723	29.0646
	0.319444	0.328799	P26583;D6R9A6	P26583;D6R9A6	High mobility group protein B2	HMGB2	69.164	12512000000	111	29.8385	30.1622	30.3141	30.6477	29.6631	30.9904
	1.05711	-0.290342	P26639;P26639-2;D6R9F8;D6RCA5;D6RDJ6;D6RBR8;D6RJ97;D6RHV7;D6RCS6	P26639;P26639-2	Threonine--tRNA ligase, cytoplasmic	TARS	130.78	3451100000	273	28.5582	28.4702	28.6069	28.0334	28.4572	28.2736
	1.67801	0.260184	P26640;A0A140T936;P26640-2;A0A140T954;A2ABF4;A0A0G2JJT9;A0A140T904;H0Y426	P26640;A0A140T936	Valine--tRNA ligase	VARS	188.08	3173800000	267	28.1832	28.0932	28.1306	28.4719	28.2655	28.4502
	0.793463	0.17763	P26641;P26641-2	P26641;P26641-2	Elongation factor 1-gamma	EEF1G	321.52	16119000000	319	30.7482	30.4689	30.5394	30.8284	30.6424	30.8186
	0.10024	0.0454375	P26885;F5H0N4	P26885;F5H0N4	Peptidyl-prolyl cis-trans isomerase FKBP2;Peptidyl-prolyl cis-trans isomerase	FKBP2	34.185	2054700000	62	27.6682	27.4853	27.5793	27.3302	27.8516	27.6874
	0.218684	-0.278147	P26992;Q5T8H6	P26992;Q5T8H6	Ciliary neurotrophic factor receptor subunit alpha	CNTFR	29.5	1375100000	62	26.21	27.824	27.518	26.8692	26.9335	26.915
	1.37134	-1.29967	P27105;P27105-2;F8VSL7	P27105	Erythrocyte band 7 integral membrane protein	STOM	48.203	767920000	59	26.7135	26.6484	26.9432	24.6022	25.8814	25.9225
	1.38018	0.609309	P27348;E9PG15	P27348	14-3-3 protein theta	YWHAQ	323.31	30741000000	215	31.0675	31.2553	31.212	31.9131	31.3994	32.0502
	0.948052	0.427023	P27361;E9PQW4;P27361-3;E9PJF0;P27361-2;E9PBK7;B3KR49;E9PRH7;H0YDH9;H0YEX6;K7ELV1;K7EN18;P31152;Q16659	P27361;E9PQW4;P27361-3;E9PJF0;P27361-2;E9PBK7;B3KR49	Mitogen-activated protein kinase 3;Mitogen-activated protein kinase	MAPK3	30.964	713590000	61	25.561	26.0787	26.1626	26.5493	26.29	26.2441
	0.0906274	-0.0449766	X1WI28;P27635;Q96L21;B8A6G2;A6QRI9	X1WI28;P27635;Q96L21	60S ribosomal protein L10;60S ribosomal protein L10-like	RPL10;RPL10L	67.421	5043400000	127	28.8383	29.0453	29.0704	29.2495	28.7108	28.8586
	2.05826	-0.610928	P27694;I3L4R8;I3L524;I3L2M5	P27694	Replication protein A 70 kDa DNA-binding subunit;Replication protein A 70 kDa DNA-binding subunit, N-terminally processed	RPA1	104.11	1708700000	164	27.5871	27.8971	27.7763	26.9816	27.2942	27.1518
	0.649816	-0.126994	P27695;G3V3M6;G3V5Q1;A0A0C4DGK8;G3V3C7;G3V5M0;G3V359;G3V5D9;H7C4A8;G3V3Y6	P27695;G3V3M6;G3V5Q1;A0A0C4DGK8;G3V3C7	DNA-(apurinic or apyrimidinic site) lyase;DNA-(apurinic or apyrimidinic site) lyase, mitochondrial	APEX1	285.33	8077000000	211	29.558	29.7187	29.7702	29.6443	29.583	29.4385
	0.300916	0.0993633	P27797;K7EJB9;K7EL50	P27797;K7EJB9	Calreticulin	CALR	323.31	43256000000	401	32.2061	31.8882	32.0424	32.1018	32.001	32.3318
	0.0812932	0.0312322	P27824;P27824-2;P27824-3;H0Y9Q7;D6RDP7;D6RGY2;D6RB85;D6RFL1;D6RAU8;H0Y9H1;D6RAQ8;D6RHJ3;D6RD16	P27824;P27824-2;P27824-3	Calnexin	CANX	317.47	24825000000	345	31.2082	31.0944	31.3855	31.3356	31.0513	31.3949
	0.987431	0.374603	P28066;P28066-2	P28066;P28066-2	Proteasome subunit alpha type-5	PSMA5	274.26	7639700000	134	29.1928	29.4047	29.4885	29.6658	29.5114	30.0326
	0.00689866	0.00341098	P28070	P28070	Proteasome subunit beta type-4	PSMB4	119.52	5188500000	118	29.0524	29.0294	28.9311	28.801	28.904	29.3181
	0.61216	0.243664	P28072;A0A087X2I4;I3L3X7	P28072;A0A087X2I4	Proteasome subunit beta type-6;Proteasome subunit beta type	PSMB6	119.15	4358400000	94	28.5965	28.7293	28.4725	28.7831	28.5964	29.1497
	0.570107	0.330221	P28074;P28074-3;H0YJM8;P28074-2	P28074;P28074-3;H0YJM8;P28074-2	Proteasome subunit beta type-5	PSMB5	92.405	6754100000	193	29.1026	29.1714	29.2925	29.5832	29.0549	29.9191
	1.06034	-0.537001	P28161;E9PHN7;E9PHN6;F6XZQ7;P28161-2;E9PLF1;E9PGV1	P28161;E9PHN7;E9PHN6;F6XZQ7;P28161-2;E9PLF1	Glutathione S-transferase Mu 2	GSTM2	113.59	6588500000	148	29.8958	29.41	29.3464	29.0027	29.3012	28.7373
	0.303469	-0.156663	P28288-2;P28288;P28288-3	P28288-2;P28288	ATP-binding cassette sub-family D member 3	ABCD3	19.151	283960000	27	24.8101	24.9401	24.8817	25.0742	24.7292	24.3585
	2.2781	-0.29891	P28331;P28331-2;P28331-4;P28331-5;B4DJ81;P28331-3;C9JPQ5;F8WDL5	P28331;P28331-2;P28331-4;P28331-5;B4DJ81;P28331-3	NADH-ubiquinone oxidoreductase 75 kDa subunit, mitochondrial	NDUFS1	99.508	1632400000	164	27.3682	27.5116	27.5347	27.1511	27.2013	27.1655
	1.21829	0.42246	P28482;P28482-2	P28482;P28482-2	Mitogen-activated protein kinase 1	MAPK1	137.2	5244100000	230	28.5583	28.7342	28.7984	29.3691	28.8626	29.1267
	1.12493	-0.573138	P28838-2;P28838;H0Y9Q1;H0Y983	P28838-2;P28838;H0Y9Q1	Cytosol aminopeptidase	LAP3	96.435	1424300000	133	27.4537	27.3351	27.3487	26.9035	27.1585	26.3562
	0.995195	-0.2806	P29144;Q5VZU9	P29144;Q5VZU9	Tripeptidyl-peptidase 2	TPP2	108.1	1158000000	147	26.9458	27.0828	26.7609	26.6472	26.8126	26.488
	1.19703	0.503628	P29218;P29218-3;H0YBL1;E5RG13;E5RIP7;E5RI82;P29218-2;E5RG94;E5RHE9;E5RGY4;E5RIF4	P29218;P29218-3;H0YBL1;E5RG13;E5RIP7;E5RI82;P29218-2;E5RG94;E5RHE9;E5RGY4	Inositol monophosphatase 1	IMPA1	47.824	1595800000	89	26.7776	27.0248	27.1498	27.7817	27.2118	27.4695
	1.06645	-0.157036	P29323-2;P29323-3;P29323;B1AKC9;Q6NVW1	P29323-2;P29323-3;P29323;B1AKC9	Ephrin type-B receptor 2;Receptor protein-tyrosine kinase	EPHB2	23.253	388510000	55	25.1987	25.3204	25.3915	25.2208	25.0827	25.1359
	1.04696	0.639592	P29373;Q5SYZ4	P29373;Q5SYZ4	Cellular retinoic acid-binding protein 2	CRABP2	119.52	4292600000	92	28.0107	28.2341	28.7934	29.2464	28.6722	29.0384
	0.886072	0.210824	P29401;P29401-2;A0A0B4J1R6;E9PFF2;F8W888;F8WAX4	P29401;P29401-2;A0A0B4J1R6	Transketolase	TKT	323.31	30087000000	495	31.1425	31.443	31.4646	31.5074	31.5396	31.6356
	1.33812	0.670755	P29762;B5MCB5	P29762;B5MCB5	Cellular retinoic acid-binding protein 1	CRABP1	152.97	44472000000	252	31.8241	31.5462	32.1231	32.6023	32.1793	32.724
	0.536664	0.43791	P29966	P29966	Myristoylated alanine-rich C-kinase substrate	MARCKS	323.31	27729000000	202	30.8655	31.4611	31.2352	31.799	31.0133	32.0632
	2.2515	0.5783	P29992;K7EL62;O95837;A0A087WVZ3	P29992;K7EL62	Guanine nucleotide-binding protein subunit alpha-11	GNA11	30.394	464730000	58	25.0105	25.1078	25.3441	25.7935	25.6585	25.7453
	0.127602	0.0963211	P30038;P30038-2;P30038-3;Q5TF55	P30038;P30038-2;P30038-3	Delta-1-pyrroline-5-carboxylate dehydrogenase, mitochondrial	ALDH4A1	53.037	644240000	83	25.4934	26.121	25.9563	26.039	25.5662	26.2547
	0.0366423	0.0234178	P30040;F8VY02;F8W1G0;P30040-2	P30040;F8VY02	Endoplasmic reticulum resident protein 29	ERP29	84.354	6346400000	114	29.0794	29.1151	29.3886	28.8386	29.3424	29.4723
	1.04613	-0.550843	P30041	P30041	Peroxiredoxin-6	PRDX6	152.8	19606000000	270	31.3858	30.9561	31.3313	30.3672	31.0685	30.5849
	0.415545	-0.22128	P30043;A0A2R8YEP4;M0R192;A0A2R8Y7Y9;M0QZL1	P30043;A0A2R8YEP4;M0R192;A0A2R8Y7Y9;M0QZL1	Flavin reductase (NADPH)	BLVRB	95.572	2464500000	131	28.4792	27.9738	27.9622	28.164	27.9392	27.6482
	0.089049	0.0386817	P30044-2;P30044;P30044-3;P30044-4	P30044-2;P30044;P30044-3;P30044-4	Peroxiredoxin-5, mitochondrial	PRDX5	141.28	12640000000	171	30.3562	30.0283	30.1814	30.2864	30.4028	29.9927
	0.958099	-0.32483	P30046;J3KQ18;B5MC82;P30046-2;A6NHG4;H7C342	P30046;J3KQ18;B5MC82;P30046-2;A6NHG4	D-dopachrome decarboxylase;D-dopachrome decarboxylase-like protein	DDT;DDTL	34.135	1478300000	47	27.5599	27.3104	27.2381	27.211	26.7992	27.1238
	0.0704099	-0.017999	P30048-2;P30048	P30048-2;P30048	Thioredoxin-dependent peroxide reductase, mitochondrial	PRDX3	161.11	9041300000	141	29.5587	29.7584	29.6983	29.5226	29.7437	29.6951
	0.26941	0.268058	P30049	P30049	ATP synthase subunit delta, mitochondrial	ATP5D	35.78	745410000	28	26.6078	25.4189	26.2592	26.6134	26.003	26.4736
	0.927306	-0.3428	P30050;P30050-2	P30050;P30050-2	60S ribosomal protein L12	RPL12	26.043	4542600000	62	28.8713	28.977	29.0426	28.6708	28.8791	28.3127
	0.524759	0.134545	P30084	P30084	Enoyl-CoA hydratase, mitochondrial	ECHS1	261.95	4862700000	140	28.8671	28.6906	28.8435	29.0785	28.747	28.9794
	0.0732819	0.032095	P30085;Q5T0D2;P30085-2;E9PJD2	P30085;Q5T0D2;P30085-2	UMP-CMP kinase	CMPK1	108.88	2451500000	121	27.8067	27.941	27.805	27.5896	28.0435	28.0158
	0.10471	-0.0498695	P30086	P30086	Phosphatidylethanolamine-binding protein 1;Hippocampal cholinergic neurostimulating peptide	PEBP1	232.8	28994000000	224	31.1734	31.6189	31.7166	31.4963	31.3761	31.4869
	0.106686	-0.0545883	P30101	P30101	Protein disulfide-isomerase A3	PDIA3	323.31	52683000000	505	32.5622	32.1616	32.5293	32.4019	32.1164	32.571
	1.51508	0.299664	P30153;B3KQV6;C9J9C1;P30154-4;P30154;P30154-2;P30154-5;E9PH38;P30154-3;E9PPI5;E9PNM7;E9PHZ6;H0YDG7;M0QXG4;M0R0K6	P30153;B3KQV6;C9J9C1	Serine/threonine-protein phosphatase 2A 65 kDa regulatory subunit A alpha isoform	PPP2R1A	323.31	16423000000	289	30.5258	30.5313	30.3709	30.7166	30.6862	30.9242
	0.042573	0.0258757	P30419-2;P30419;K7EN82;B7Z8J4	P30419-2;P30419	Glycylpeptide N-tetradecanoyltransferase 1	NMT1	153.13	1593900000	93	27.3427	27.3285	27.2085	27.1228	27.1101	27.7246
	0.188626	-0.077879	P30519;A0A087WT44;P30519-2;I3L159;I3L1F5;I3L4P8;A0A1B0GXH0;I3L463;I3L276;I3L1Y2	P30519;A0A087WT44;P30519-2;I3L159;I3L1F5;I3L4P8;A0A1B0GXH0;I3L463	Heme oxygenase 2	HMOX2	120.68	678810000	94	25.992	25.9745	26.0271	25.8711	26.2133	25.6757
	0.543543	-0.289173	P30520	P30520	Adenylosuccinate synthetase isozyme 2	ADSS	27.671	748080000	85	26.4235	26.2894	26.4749	25.832	26.5604	25.928
	0.548214	0.368975	P30533;A0A3B3IRQ7;D6REW6	P30533;A0A3B3IRQ7	Alpha-2-macroglobulin receptor-associated protein	LRPAP1	14.82	631820000	57	25.8169	25.6968	25.9997	26.2953	25.6758	26.6491
	1.20128	-0.246576	P30711;A0A0G2JRQ5;P30711-2;A0A0G2JQD2;A0A0G2JQM0;A0A0G2JRN4;A0A0G2JMS2;A0A0G2JQD8;A0A0G2JRG0;A0A1B0GXB6;A0A0G2JRJ5	P30711;A0A0G2JRQ5	Glutathione S-transferase theta-1	GSTT1	46.077	485940000	48	25.7878	25.6771	25.4948	25.3352	25.4894	25.3954
	1.83239	-0.825341	P30837;A0A0U1RQK9	P30837	Aldehyde dehydrogenase X, mitochondrial	ALDH1B1	73.729	523120000	46	25.9386	26.3032	25.9042	25.2924	25.4503	24.9272
	0.359024	0.138522	P31040;D6RFM5;P31040-2;A0A087X1I3;P31040-3;H0Y8X1	P31040;D6RFM5;P31040-2;A0A087X1I3;P31040-3	Succinate dehydrogenase [ubiquinone] flavoprotein subunit, mitochondrial	SDHA	164.14	3204700000	161	28.4698	28.0654	28.1299	28.4249	28.1629	28.4928
	0.337354	0.274081	P31146;H3BRY3;H3BTU6;H3BRJ0;H3BNA2;H3BU76;H3BSL1	P31146;H3BRY3;H3BTU6	Coronin-1A;Coronin	CORO1A	65.136	586300000	48	25.8439	25.6858	25.3738	26.0409	25.3253	26.3596
	1.76008	0.611804	P31150;G5E9U5	P31150	Rab GDP dissociation inhibitor alpha	GDI1	323.31	21586000000	285	30.4308	30.8339	30.8037	31.4611	31.1593	31.2834
	0.247306	-0.248851	P31153;P31153-2;Q00266	P31153;P31153-2	S-adenosylmethionine synthase isoform type-2	MAT2A	51.041	2083500000	95	27.3991	27.8312	27.5606	27.9239	27.4835	26.6369
	1.7243	1.04159	P31323	P31323	cAMP-dependent protein kinase type II-beta regulatory subunit	PRKAR2B	123.63	2011100000	161	26.7339	27.4554	26.6738	27.9899	27.8132	28.1848
	0.648377	0.193937	P31689;P31689-2	P31689;P31689-2	DnaJ homolog subfamily A member 1	DNAJA1	145.38	3292500000	172	27.8683	28.1168	28.1759	28.4359	28.1932	28.1137
	0.0971893	-0.0482845	P31749-2;P31749;A0A087WY56;G3V3X1;G3V2I6;J3KTC6	P31749-2;P31749;A0A087WY56	RAC-alpha serine/threonine-protein kinase	AKT1	16.809	286080000	39	25.053	24.8458	24.666	24.5383	24.9994	24.8822
	1.46104	0.281225	P31930;F8WEF1;F8WER5	P31930	Cytochrome b-c1 complex subunit 1, mitochondrial	UQCRC1	161.13	2929500000	190	27.7697	27.9636	27.992	28.2457	28.0782	28.245
	0.619191	-0.30038	P31937;H7BZL2	P31937	3-hydroxyisobutyrate dehydrogenase, mitochondrial	HIBADH	280.66	2208900000	117	27.9015	27.8584	27.9886	27.198	27.91	27.7394
	1.60833	-0.325593	P31939;P31939-2;H7C1S2;C9JLK0;F8WEF0	P31939;P31939-2	Bifunctional purine biosynthesis protein PURH;Phosphoribosylaminoimidazolecarboxamide formyltransferase;IMP cyclohydrolase	ATIC	260.55	9887300000	398	30.1005	30.1576	30.2093	29.7737	30.0014	29.7155
	0.0245603	0.0159715	P31942;P31942-2;P31942-3;P31942-4;P31942-5;P31942-6	P31942;P31942-2;P31942-3;P31942-4	Heterogeneous nuclear ribonucleoprotein H3	HNRNPH3	188.76	3896500000	136	28.4584	28.5846	28.9123	28.8985	28.335	28.7697
	0.519513	0.160264	P31946-2;P31946;Q4VY20;Q4VY19;A0A0J9YWE8;A0A0J9YWZ2	P31946-2;P31946	14-3-3 protein beta/alpha;14-3-3 protein beta/alpha, N-terminally processed	YWHAB	323.31	16618000000	183	30.5969	30.6203	30.527	30.8163	30.484	30.9246
	0.224537	0.313527	P31949	P31949	Protein S100-A11;Protein S100-A11, N-terminally processed	S100A11	68.326	4597600000	35	29.5273	28.6423	27.6995	28.6783	29.1524	28.9789
	0.771087	0.432063	P32119;A6NIW5;P32119-2	P32119;A6NIW5	Peroxiredoxin-2	PRDX2	167.56	37423000000	198	31.3738	31.6553	31.7603	32.2095	31.5702	32.3058
	0.0134703	0.00495084	P32322;E2QRB3;P32322-3;P32322-2;J3KQ22;J3QL24;J3QKT4;J3QLK9;J3QL32;J3QL23;J3KTA8;J3QKT3;J3QRZ0;J3QR88;J3KSA9	P32322;E2QRB3;P32322-3;P32322-2;J3KQ22	Pyrroline-5-carboxylate reductase 1, mitochondrial;Pyrroline-5-carboxylate reductase	PYCR1	134.13	2956800000	134	28.237	27.9507	28.1743	27.9821	28.1185	28.2762
	0.25257	0.108747	P32969;D6RAN4;A0A2R8Y5Y7;E7ESE0;H0Y9V9;H0Y9R4	P32969;D6RAN4;A0A2R8Y5Y7;E7ESE0;H0Y9V9	60S ribosomal protein L9	RPL9	115.43	5314300000	150	28.8134	28.9217	29.1062	29.1933	28.7602	29.214
	0.972795	0.301558	P33176	P33176	Kinesin-1 heavy chain	KIF5B	323.31	9347000000	455	29.7301	29.6728	29.7227	30.2186	29.7335	30.0781
	0.825133	-1.7364	P33992;B1AHB1;B1AHA9;B1AHB2;F8WFD7	P33992;B1AHB1	DNA replication licensing factor MCM5;DNA helicase	MCM5	33.06	617550000	59	26.5798	26.6741	26.0794	25.7396	25.5896	22.7949
	0.679061	-1.85959	P33993;P33993-3;P33993-2;C9J8M6	P33993;P33993-3	DNA replication licensing factor MCM7	MCM7	69.617	672980000	73	26.5212	26.8979	26.2156	26.035	25.7888	22.2322
	0.0797325	-0.186569	P34059;H3BP66	P34059	N-acetylgalactosamine-6-sulfatase	GALNS	19.981	127300000	23	22.4928	23.946	23.5294	21.7341	23.9378	23.7366
	1.10201	-0.88226	P34896-2;P34896;P34896-4;P34896-3;J3KRZ5;J3KRK5	P34896-2;P34896;P34896-4;P34896-3	Serine hydroxymethyltransferase, cytosolic	SHMT1	13.534	116420000	27	24.0771	24.1806	23.7352	23.8167	22.7215	22.8078
	1.28924	-0.366454	P34897-3;P34897;P34897-2;H0YIZ0;G3V2Y4;G3V5L0;G3V4W5;G3V540;G3V2W0;G3V241;G3V3Y8;G3V4T0;G3V4X0;G3V2E4;G3V2D2;G3V2Y1;G3V3C6	P34897-3;P34897;P34897-2;H0YIZ0;G3V2Y4	Serine hydroxymethyltransferase, mitochondrial;Serine hydroxymethyltransferase	SHMT2	152.42	5412200000	218	29.2557	29.1875	29.3177	28.6858	29.1243	28.8513
	1.15633	0.519619	P34932;A0A087WYC1;A0A087WTS8;P34932-2	P34932;A0A087WYC1;A0A087WTS8	Heat shock 70 kDa protein 4	HSPA4	323.31	17571000000	577	30.1807	30.3843	30.5105	30.994	30.51	31.1304
	0.849744	0.162469	P34949;H3BPB8;F5GX71;P34949-2;H3BMZ9;H3BPP3;H3BUZ9;H3BP57;H3BT48;H3BPM5;H3BQX0;H3BNY8;H3BPU7;H3BU66;H3BN01;H3BT46;H3BUG1;B4DYB8	P34949;H3BPB8;F5GX71;P34949-2;H3BMZ9;H3BPP3;H3BUZ9;H3BP57;H3BT48	Mannose-6-phosphate isomerase	MPI	93.317	1016200000	104	26.5265	26.5148	26.6302	26.5678	26.8439	26.7473
	0.944559	1.57621	P35052;H7C410;H7BZL4;H7C024;P35052-2;C9J4Y6;H7BZE9	P35052;H7C410;H7BZL4	Glypican-1;Secreted glypican-1	GPC1	51.833	815590000	67	25.8299	23.4307	25.466	26.7344	26.6917	26.0291
	0.63972	-0.0984739	P35221;P35221-2;G3XAM7;P35221-3;E5RIB1;E5RG03;E5RHV7;E5RGY6;E5RJ41;E5RJL0;E5RIE0;E5RFM3;E5RGY7;E5RFG3;E5RFK9;E5RFM5;E5RJP7;E5RGD2;H0YBB8;A0A087WZL6;E5RGU3;E5RHJ5;E5RJZ2;E5RGG4;E5RJ43;E5RGS1;E5RIT8;Q9UI47	P35221;P35221-2;G3XAM7;P35221-3	Catenin alpha-1	CTNNA1	323.31	6434300000	324	29.43	29.3168	29.2471	29.3173	29.2151	29.1661
	0.0684298	0.01887	P35232;C9JW96;C9JZ20;E7ESE2;E9PCW0;P35232-2;D6RBK0	P35232;C9JW96;C9JZ20;E7ESE2;E9PCW0;P35232-2	Prohibitin	PHB	232.3	14590000000	255	30.3491	30.4804	30.6551	30.5865	30.4947	30.46
	0.302492	-0.213924	P35237;A0A024QZX5;A0A087X1N8;A0A2R8YD12;A0A2R8Y6A7;A0A2R8YDD0;A0A2R8Y517;A0A2R8Y5S1;A0A2R8Y6N4;C9JTJ8;C9JVA8	P35237;A0A024QZX5;A0A087X1N8;A0A2R8YD12;A0A2R8Y6A7	Serpin B6	SERPINB6	265.42	3167300000	191	28.7133	28.1228	28.2604	27.7095	28.4509	28.2944
	1.28488	-0.663893	P35244;B5MC59	P35244;B5MC59	Replication protein A 14 kDa subunit	RPA3	138.68	1094200000	80	26.9231	27.0254	27.1991	26.0354	26.8148	26.3056
	0.703313	-0.425762	P35249;C9JZI1;P35249-2;C9JTT7;C9J8M3;C9JXZ7;C9JGY5;F8WE44;H7C1P0;C9JW34	P35249;C9JZI1;P35249-2;C9JTT7;C9J8M3;C9JXZ7	Replication factor C subunit 4	RFC4	24.012	194340000	30	24.4323	24.7176	24.7121	24.3865	24.5171	23.6812
	1.08367	-1.7822	P35250;P35250-2;A0A087WVY3;H7C5P4;H7C5Q7;F8WC37;H7C5A0;H7C5G4;H7C596	P35250;P35250-2;A0A087WVY3	Replication factor C subunit 2	RFC2	34.425	265690000	30	25.2462	25.4784	25.386	25.0868	23.1467	22.5306
	0.0111238	-0.00900078	P35268;K7ERI7;K7ELC4;K7EMH1;K7EJT5;K7EP65;K7EKS7;C9JYQ9;H0Y8C2;Q6P5R6	P35268;K7ERI7;K7ELC4;K7EMH1	60S ribosomal protein L22	RPL22	37.795	4874800000	39	28.8721	28.8549	28.823	29.3268	28.7881	28.4081
	0.393953	0.210318	P35269;M0QXD6;M0R0Z3;M0R0R9	P35269;M0QXD6;M0R0Z3;M0R0R9	General transcription factor IIF subunit 1	GTF2F1	42.288	510670000	73	25.035	25.7729	25.5848	25.7541	25.6614	25.6083
	0.257625	-0.276683	P35555;F6U495	P35555	Fibrillin-1	FBN1	9.5239	460670000	35	25.5619	25.7353	25.9408	25.178	24.9457	26.2844
	0.189886	-0.101268	P35573;P35573-2;P35573-3;A0A1C7CYW1	P35573;P35573-2;P35573-3	Glycogen debranching enzyme;4-alpha-glucanotransferase;Amylo-alpha-1,6-glucosidase	AGL	53.74	614620000	105	26.0529	25.7786	25.7695	25.9532	25.9416	25.4024
	1.75503	-0.372789	P35579;P35579-2;Q5BKV1;B1AH99;A0A2R8Y4C3;REV__S4R3H4;REV__E7EQT4;REV__Q9UKV3-5;REV__Q9UKV3	P35579;P35579-2	Myosin-9	MYH9	323.31	25267000000	1038	31.5905	31.3036	31.5699	31.0754	31.1095	31.1606
	0.440838	0.16174	P35606;P35606-2;D6R997;H0Y938;D6RBZ7;D6RCL6;D6RBG7;D6RBT6;H0YAC7	P35606;P35606-2	Coatomer subunit beta	COPB2	206.24	5914300000	332	29.2627	28.8074	29.0901	29.3448	29.0558	29.2447
	0.173414	0.0683428	P35611;P35611-3;E7EV99;E7ENY0;P35611-2;P35611-6;P35611-4;P35611-5;A0A0A0MSR2;H0Y9H2;D6RF25;D6RAH3;D6RJE2;H0YFD8;H0YG19	P35611;P35611-3;E7EV99;E7ENY0;P35611-2;P35611-6;P35611-4;P35611-5;A0A0A0MSR2;H0Y9H2	Alpha-adducin	ADD1	115.04	3916500000	195	28.8483	28.5175	28.4302	28.7795	28.5175	28.704
	1.02876	1.70817	P35612;P35612-4;P35612-3;P35612-2;P35612-8;P35612-9;C9JTM0;C9J080;A0A1C7CYY0;P35612-5;P35612-6;C9J299;P35612-7	P35612;P35612-4;P35612-3;P35612-2;P35612-8;P35612-9	Beta-adducin	ADD2	140.78	1190500000	97	24.2093	26.6205	26.1094	27.7072	26.8376	27.5188
	0.0193355	-0.0165291	P35637-2;P35637;H3BPE7	P35637-2;P35637;H3BPE7	RNA-binding protein FUS	FUS	77.23	6088800000	79	28.9524	29.457	29.3577	29.4706	28.7613	29.4856
	3.46078	-0.727615	P35658-2;P35658-4;P35658;P35658-3;P35658-5;A0A0A0MSW3;H0Y837;B7ZAV2;H0YF36;E9PKD2	P35658-2;P35658-4;P35658;P35658-3;P35658-5;A0A0A0MSW3	Nuclear pore complex protein Nup214	NUP214	71.591	355750000	77	25.3849	25.4348	25.4817	24.5913	24.7521	24.7752
	0.0610685	0.04212	P35659;H0Y8X0;B4DFG0;P35659-2;D6R9L5;D6RDA2;H0Y993	P35659;H0Y8X0;B4DFG0;P35659-2;D6R9L5	Protein DEK	DEK	123.89	3484700000	111	28.0339	28.5211	28.49	28.4734	28.0453	28.6526
	0.314788	-0.262065	P35749-4;P35749-3;P35749;P35749-2	P35749-4;P35749-3;P35749;P35749-2	Myosin-11	MYH11	35.015	2004600000	60	27.5713	27.7149	27.593	27.8554	27.52	26.7176
	0.915302	0.663914	P35754	P35754	Glutaredoxin-1	GLRX	69.209	611790000	39	25.2547	25.3068	25.3973	26.5601	25.9945	25.3959
	0.996282	0.570797	P35813;P35813-3;P35813-2;E9PKB5;E9PJN3;E9PL75	P35813;P35813-3;P35813-2;E9PKB5	Protein phosphatase 1A	PPM1A	20.278	467100000	44	24.8621	25.1411	25.3574	25.8945	25.2372	25.9412
	0.608609	-0.345388	P35914;P35914-3;P35914-2;H0Y2L7;G5E9S9;B7Z4D4;B7Z212;Q8TB92-5;Q8TB92-2;Q8TB92	P35914;P35914-3;P35914-2	Hydroxymethylglutaryl-CoA lyase, mitochondrial	HMGCL	34.742	446520000	42	25.9489	25.3064	25.5127	24.9209	25.4973	25.3135
	1.12322	-0.299233	P35998;A0A1W2PQS1;P35998-2;C9JLS9	P35998;A0A1W2PQS1;P35998-2	26S protease regulatory subunit 7	PSMC2	160.7	4487500000	252	29.1462	28.798	29.0145	28.669	28.8223	28.5698
	0.70535	-1.05315	P36404;V9GYD0;P36404-2	P36404;V9GYD0;P36404-2	ADP-ribosylation factor-like protein 2	ARL2;ARL2-SNX15	12.623	368240000	27	25.4267	25.2639	25.4912	25.1675	22.9966	24.8582
	0.256236	-0.146471	P36405	P36405	ADP-ribosylation factor-like protein 3	ARL3	57.466	2025800000	83	27.4002	27.8502	27.8375	27.2865	27.8743	27.4877
	0.797619	0.340279	P36507;G5E9C7;M0R1B6	P36507;G5E9C7	Dual specificity mitogen-activated protein kinase kinase 2	MAP2K2	141.92	1570400000	97	27.0329	27.1486	27.1131	27.4679	27.0885	27.759
	1.87065	0.664724	P36543;P36543-3;P36543-2;C9J8H1	P36543;P36543-3;P36543-2;C9J8H1	V-type proton ATPase subunit E 1	ATP6V1E1	60.64	1637600000	95	26.7708	26.944	26.9336	27.841	27.4196	27.3819
	0.298052	0.146688	P36578;H3BM89;H3BTP7;H3BU31	P36578;H3BM89	60S ribosomal protein L4	RPL4	83.458	10999000000	194	29.8723	30.0079	30.1264	30.3011	29.7793	30.3663
	0.441226	-0.184721	P36871;A0A3B3ITK7;P36871-2;P36871-3	P36871;A0A3B3ITK7;P36871-2;P36871-3	Phosphoglucomutase-1	PGM1	174.87	4446200000	236	29.022	28.6215	28.727	28.8071	28.6571	28.3521
	0.42059	0.230178	P36915;A0A140T8Y2;P36915-2;A2AB27	P36915;A0A140T8Y2;P36915-2	Guanine nucleotide-binding protein-like 1	GNL1	45.127	369140000	57	24.8059	25.5382	25.1474	25.4252	25.2102	25.5466
	0.153348	-0.345094	P36955;I3L4Z0;I3L4N7;I3L107;CON__Q95121;I3L4F9;I3L2R7;I3L425;I3L3Z3;I3L1U4	P36955	Pigment epithelium-derived factor	SERPINF1	35.595	762350000	53	26.942	25.3825	25.3811	24.6348	26.8374	25.1981
	1.42351	0.352427	P36957;P36957-2;Q86SW4;H0YJF9;G3V3F0;G3V5M3	P36957;P36957-2	Dihydrolipoyllysine-residue succinyltransferase component of 2-oxoglutarate dehydrogenase complex, mitochondrial	DLST	153.81	3363300000	136	28.0408	28.0522	28.192	28.6149	28.2555	28.4718
	0.106385	0.235118	P37059;H3BS44;H3BRZ6;H3BNN1;H3BQY3	P37059;H3BS44	Estradiol 17-beta-dehydrogenase 2	HSD17B2	40.844	180480000	30	23.0336	22.0005	22.7694	21.7275	24.2254	22.556
	0.00489593	0.00217183	P37108;H0YLA2;H0YLW0	P37108;H0YLA2	Signal recognition particle 14 kDa protein	SRP14	127.72	3625000000	94	28.3895	28.4493	28.4829	28.71	28.2223	28.3959
	0.134047	0.0608298	P37198;M0QXN5;M0QX10;M0QYY0;M0QX13;M0QZL5;M0R1S1;M0QX64;M0R302	P37198;M0QXN5	Nuclear pore glycoprotein p62	NUP62	170.07	972460000	78	26.2925	26.6444	26.6403	26.6744	26.3496	26.7358
	0.419597	-0.330603	P37268;E9PNM1;A0A1W2PQ47;P37268-2;P37268-3;P37268-5;P37268-4;E9PS69;E9PJG4;E9PQ90;E9PNJ2;E9PSH1	P37268;E9PNM1;A0A1W2PQ47;P37268-2;P37268-3;P37268-5;P37268-4	Squalene synthase	FDFT1	100.19	2157000000	114	27.6547	27.939	28.2989	27.966	27.8561	27.0787
	0.156589	-0.0776183	P37802;P37802-2;X6RJP6	P37802;P37802-2;X6RJP6	Transgelin-2	TAGLN2	257.19	4672900000	152	29.2347	28.6651	28.8233	28.7457	28.7648	28.9798
	1.34355	0.595925	P37837;F2Z393	P37837;F2Z393	Transaldolase	TALDO1	33.605	6834300000	95	28.7882	29.0948	29.2545	29.6498	29.3678	29.9077
	0.171397	0.0781352	P38117;P38117-2;M0QY67	P38117;P38117-2;M0QY67	Electron transfer flavoprotein subunit beta	ETFB	54.949	2531500000	119	28.149	27.5654	27.952	27.9406	28.0025	27.9577
	0.273499	0.279202	P38159;H0Y6E7;H3BT71;P38159-2;H3BR27;H3BUY5;P38159-3;O75526;H3BNC1	P38159;H0Y6E7;H3BT71;P38159-2	RNA-binding motif protein, X chromosome;RNA-binding motif protein, X chromosome, N-terminally processed	RBMX	58.354	4981100000	115	28.0134	29.1447	29.0573	29.3822	28.7514	28.9195
	1.33266	0.461154	P38606;P38606-2;C9JVW8;C9JA17	P38606;P38606-2	V-type proton ATPase catalytic subunit A	ATP6V1A	268.59	6487800000	272	28.9241	29.2402	29.0159	29.3661	29.414	29.7836
	0.107104	0.0252355	P38646;A0A3B3ITI4;D6RJI2;H0Y8S0;D6RA73;H0YBG6;A0A3B3ITN1	P38646	Stress-70 protein, mitochondrial	HSPA9	323.31	14219000000	491	30.4907	30.225	30.4103	30.3727	30.3639	30.4651
	0.484032	0.281591	P38919;I3L3H2	P38919;I3L3H2	Eukaryotic initiation factor 4A-III;Eukaryotic initiation factor 4A-III, N-terminally processed	EIF4A3	118.14	4644700000	189	28.3675	28.7829	28.9318	29.1557	28.599	29.1723
	0.0760108	0.0418987	P39019;A0A075B6E2;M0R2L9;M0QXK4;M0QYF7;M0R140	P39019;A0A075B6E2	40S ribosomal protein S19	RPS19	15.23	4437900000	58	28.6807	28.7215	28.7901	29.1521	28.6238	28.5421
	0.234272	0.0963567	P39023;H7C422;G5E9G0;H7C3M2;B5MCW2;F8WCR1;Q92901	P39023;H7C422;G5E9G0;H7C3M2;B5MCW2	60S ribosomal protein L3	RPL3	154.65	11811000000	244	30.0318	30.138	30.2695	30.351	29.9534	30.424
	0.29932	0.148176	P39060-2;P39060-1;P39060;H7BXV5;H7C457	P39060-2;P39060-1;P39060;H7BXV5;H7C457	Collagen alpha-1(XVIII) chain;Endostatin	COL18A1	57.635	1705600000	113	27.2679	27.1194	27.5275	27.6529	27.1327	27.5738
	0.817451	-0.493022	P39748;P39748-2;I3L3E9;F5H1Y3	P39748;P39748-2;I3L3E9	Flap endonuclease 1	FEN1	168.87	1357500000	74	26.991	27.4988	27.5029	27.2544	26.7607	26.4986
	0.0790413	-0.0504265	P40121;P40121-2;E7ENU9;B8ZZL6;H7C0X8	P40121;P40121-2;E7ENU9	Macrophage-capping protein	CAPG	55.498	583110000	61	25.9906	25.6575	25.8266	25.7969	26.1149	25.4115
	1.18522	0.386936	P40123;E9PDI2;A0A087WZ15;A0A087X0J3;P40123-2;F8WDB9;B7Z385;P40123-3;F8WEW0	P40123;E9PDI2;A0A087WZ15;A0A087X0J3;P40123-2;F8WDB9;B7Z385	Adenylyl cyclase-associated protein 2;Adenylyl cyclase-associated protein	CAP2	62.791	2405800000	110	27.3167	27.7036	27.6896	27.947	28.1117	27.812
	1.85732	0.351149	P40227;P40227-2;Q92526;Q92526-2;Q92526-3;J3KRI6	P40227;P40227-2	T-complex protein 1 subunit zeta	CCT6A	323.31	24783000000	417	30.8639	30.9824	31.0318	31.3105	31.1935	31.4276
	0.359796	0.144553	P40429;M0QYS1;Q8J015;Q6NVV1;M0QZU1;A0A096LPE0	P40429;M0QYS1;Q8J015	60S ribosomal protein L13a	RPL13A;RPL13a	23.102	5576100000	106	29.0784	28.917	29.1142	29.3164	28.8698	29.357
	0.351691	-0.357271	P40616-2;P40616;B4DZG7;F8VYN9;F8VP99;F8VP63	P40616-2;P40616;B4DZG7;F8VYN9	ADP-ribosylation factor-like protein 1	ARL1	26.094	833050000	40	26.5324	26.5453	26.2825	25.4899	26.8859	25.9126
	0.35144	-0.206267	P40763-3;P40763-2;P40763;G8JLH9;K7EP08	P40763-3;P40763-2;P40763;G8JLH9	Signal transducer and activator of transcription 3;Signal transducer and activator of transcription	STAT3	104.22	550420000	75	26.2248	25.6057	25.5924	25.3723	25.624	25.8077
	0.424874	0.646599	P40855;Q5QNY5;P40855-5;E9PS71;B7Z8B3;H0YJ60;H0YDY4;A0A3B3IRZ1	P40855;Q5QNY5;P40855-5	Peroxisomal biogenesis factor 19	PEX19	166.91	217500000	35	22.7731	24.462	24.7835	25.0011	24.3835	24.5739
	1.15671	0.345646	P40925;P40925-3;B9A041;P40925-2;C9JF79;B8ZZ51;C9JRL4;C9JLV6;F8WFC2;C9IZI0	P40925;P40925-3;B9A041;P40925-2;C9JF79;B8ZZ51	Malate dehydrogenase, cytoplasmic;Malate dehydrogenase	MDH1	80.88	18171000000	163	30.2502	30.5367	30.6705	30.9521	30.7239	30.8183
	0.0481814	-0.0201785	P40926;P40926-2;G3XAL0	P40926;P40926-2;G3XAL0	Malate dehydrogenase, mitochondrial;Malate dehydrogenase	MDH2	160.09	25466000000	216	31.1747	31.2393	31.3474	30.9891	31.4526	31.2591
	1.3635	-1.12903	P40937-2;P40937;F5H304;E9PEP3;F5H5S0;C9JH72;F5H0U6	P40937-2;P40937	Replication factor C subunit 5	RFC5	22.223	142240000	17	24.5795	24.6424	24.5192	22.7812	24.1154	23.4574
	0.969561	0.4127	P41091;Q2VIR3;Q2VIR3-2;H7BZU1	P41091;Q2VIR3;Q2VIR3-2	Eukaryotic translation initiation factor 2 subunit 3;Putative eukaryotic translation initiation factor 2 subunit 3-like protein	EIF2S3;EIF2S3L	126	2929000000	143	27.842	27.7975	28.027	28.4245	27.9349	28.5452
	0.00615155	0.0048542	P41208;Q12798	P41208	Centrin-2	CETN2	109.98	678810000	45	25.8962	26.1365	25.746	25.8173	25.5976	26.3785
	1.97554	-1.16173	P41219;P41219-2;F8W835;H7C5W5	P41219;P41219-2	Peripherin	PRPH	55.084	1140400000	86	27.4611	27.0932	27.8974	26.1613	26.2768	26.5284
	0.521384	0.28179	P41227;P41227-2;F8W808;A8MWP7;C9JN83;C9JW55;Q9BSU3;H0Y8T0	P41227;P41227-2;F8W808;A8MWP7;C9JN83	N-alpha-acetyltransferase 10	NAA10	31.942	664740000	48	25.6746	25.9674	25.9783	26.0772	25.8269	26.5616
	0.733452	-0.334782	P41240;H3BUM9;H3BN15;K7ENL8;K7ES68;K7EQY5;P42679-3;P42679;P42679-2	P41240	Tyrosine-protein kinase CSK	CSK	22.93	292090000	45	24.7596	25.0664	25.3183	24.968	24.5203	24.6517
	0.234639	-0.106944	P41250;H7C443;F8WCK4	P41250	Glycine--tRNA ligase	GARS	316.13	5781300000	237	29.5933	29.0076	29.2746	29.1599	29.2963	29.0985
	1.23348	-0.365722	P41252;A0A0A0MSX9;J3KR24;Q5TCD1;Q5TCC6;Q5TCC9	P41252;A0A0A0MSX9;J3KR24	Isoleucine--tRNA ligase, cytoplasmic	IARS	271.53	4915000000	365	29.1411	29.0999	29.0269	28.7279	28.9555	28.4872
	0.247505	-0.0470956	P42025	P42025	Beta-centractin	ACTR1B	47.116	1531800000	67	27.282	27.2752	27.0922	27.0976	27.2445	27.1659
	1.47876	0.219072	P42126;P42126-2;Q96DC0;H3BS70	P42126;P42126-2;Q96DC0;H3BS70	Enoyl-CoA delta isomerase 1, mitochondrial	ECI1;DCI	113.41	3280400000	109	28.2787	28.1471	28.2596	28.4218	28.3677	28.5531
	0.141484	0.0845642	P42167;G5E972;P42167-2;H0YJH7;P42167-3	P42167;G5E972;P42167-2;H0YJH7;P42167-3	Lamina-associated polypeptide 2, isoforms beta/gamma;Thymopoietin;Thymopentin	TMPO	269.75	10094000000	197	29.7008	30.023	30.027	30.148	29.6184	30.2381
	0.89917	-0.36309	P42224;P42224-2;J3KPM9;E7EPD2;D2KFR9;E7ENM1;E9PH66;H7BZ88;H7BZB5	P42224;P42224-2;J3KPM9	Signal transducer and activator of transcription 1-alpha/beta;Signal transducer and activator of transcription	STAT1	72.321	629480000	105	26.3092	26.1262	25.9727	26.0828	25.6958	25.5402
	1.17769	-0.97846	P42285;H0YAC4;H0Y8U3;D6REC7	P42285	Superkiller viralicidic activity 2-like 2	SKIV2L2	51.551	621600000	79	26.475	26.3386	26.1958	25.7141	25.7657	24.5941
	0.154521	0.301893	P42345;B1AKP8;B1AKQ2	P42345	Serine/threonine-protein kinase mTOR	MTOR	57.053	150320000	58	22.797	21.9943	23.192	21.8807	24.0957	22.9125
	0.839798	-1.02588	P42566;B1AUU8;P42566-2	P42566;B1AUU8	Epidermal growth factor receptor substrate 15	EPS15	19.341	217790000	37	24.6808	24.7163	25.2541	23.6022	24.8868	23.0846
	0.400041	0.18102	P42574;C9JXR7;A8MVM1	P42574	Caspase-3;Caspase-3 subunit p17;Caspase-3 subunit p12	CASP3	81.367	1026600000	84	26.3582	26.8209	26.4322	26.5303	26.6644	26.9597
	0.0490419	-0.0194772	P42704;B8ZZ38;A0A0C4DG06;C9JCA9;H7C3W8	P42704	Leucine-rich PPR motif-containing protein, mitochondrial	LRPPRC	323.31	5499800000	481	29.1208	28.9999	29.1106	29.0434	29.2907	28.8389
	0.700549	0.319269	P42765;A0A0B4J2A4;K7EME0;K7EJ68;K7EJB1;K7ER88	P42765;A0A0B4J2A4;K7EME0	3-ketoacyl-CoA thiolase, mitochondrial	ACAA2	266.4	6755700000	225	29.2174	29.1586	29.2239	29.6184	29.122	29.8174
	0.259167	0.194485	P42766;F2Z388	P42766;F2Z388	60S ribosomal protein L35	RPL35	4.5705	3052700000	22	27.9872	28.1776	28.4074	28.5544	27.8511	28.7502
	0.645686	-0.304187	P42785;P42785-2;E9PIG4;E9PQN3;E9PKN6;E9PQB5;E9PL85;E9PLY4;E9PNF7;E9PNJ1;E9PL49;E9PR42	P42785;P42785-2;E9PIG4;E9PQN3;E9PKN6;E9PQB5;E9PL85	Lysosomal Pro-X carboxypeptidase	PRCP	118.92	3382700000	122	28.4725	28.4402	28.6693	27.9616	28.0909	28.617
	0.966599	0.450374	P43034;I3L3N5;P43034-2;I3L495	P43034	Platelet-activating factor acetylhydrolase IB subunit alpha	PAFAH1B1	323.31	4945800000	180	28.4592	28.7566	28.6227	29.1333	28.6861	29.3703
	0.741774	0.82033	P43155-2;P43155;P43155-3;H0Y4Z7;B7ZBP5;A6PVN3	P43155-2;P43155;P43155-3	Carnitine O-acetyltransferase	CRAT	32.242	213140000	53	24.1374	22.9888	24.4049	24.2746	25.163	24.5546
	1.8204	-0.723388	P43246;P43246-2;A0A2R8YFH0;E9PHA6;A0A2R8Y6P0;A0A2R8YG02;A0A2R8Y7S8;C9J809;A0A2R8Y713	P43246;P43246-2;A0A2R8YFH0;E9PHA6;A0A2R8Y6P0;A0A2R8YG02;A0A2R8Y7S8	DNA mismatch repair protein Msh2	MSH2	142.06	2296300000	183	28.0456	28.2914	28.3308	27.705	27.5931	27.1995
	0.166336	0.0881367	P43304-2;P43304;F5GYK7	P43304-2;P43304	Glycerol-3-phosphate dehydrogenase, mitochondrial	GPD2	67.99	446940000	75	25.6059	25.0535	25.3583	25.243	25.6522	25.387
	1.06408	-0.278659	P43487-2;P43487;F6WQW2;C9JXG8;C9JJ34;C9JGV6;C9JDM3;C9JIC6	P43487-2;P43487;F6WQW2;C9JXG8;C9JJ34;C9JGV6	Ran-specific GTPase-activating protein	RANBP1	63.685	4988300000	110	29.0611	29.0588	29.3169	29.0127	28.8807	28.7074
	0.0319434	-0.01614	P43490;A0A0C4DFS8;C9JG65;C9JF35	P43490;A0A0C4DFS8	Nicotinamide phosphoribosyltransferase	NAMPT	235.81	2179600000	135	27.5272	27.75	27.8956	27.5116	27.9603	27.6525
	0.0641668	0.0290661	P43686;P43686-2	P43686;P43686-2	26S protease regulatory subunit 6B	PSMC4	323.31	5033900000	235	29.1891	29.035	28.6777	28.9096	29.0336	29.0458
	0.0426166	0.105085	P45877	P45877	Peptidyl-prolyl cis-trans isomerase C	PPIC	9.7269	266440000	23	25.623	24.7071	23.0428	24.1945	25.3005	24.1932
	0.784517	-0.402461	P45973;F8VNY3	P45973	Chromobox protein homolog 5	CBX5	82.335	798910000	58	26.5128	26.5902	26.3629	26.394	26.2214	25.6431
	1.25634	-0.390954	P45974-2;P45974;F5H571	P45974-2;P45974	Ubiquitin carboxyl-terminal hydrolase 5	USP5	323.31	7152600000	403	29.841	29.702	29.5658	29.3866	29.4769	29.0725
	0.467716	0.240739	P45983-3;P45983-2;P45983-4;P45983;P45983-5;C9J762;A0A3B3IRW7	P45983-3;P45983-2;P45983-4;P45983;P45983-5	Mitogen-activated protein kinase 8	MAPK8	11.841	188230000	41	24.0627	24.2633	24.0036	24.2646	24.0403	24.7468
	0.402282	-0.254255	P45985;P45985-2;R4GN37	P45985;P45985-2	Dual specificity mitogen-activated protein kinase kinase 4	MAP2K4	28.924	358800000	53	25.2508	25.1403	25.4506	25.0986	25.4219	24.5585
	0.1091	-0.0370471	P46060;H0Y4Q3;B0QYT5;B0QYT4	P46060	Ran GTPase-activating protein 1	RANGAP1	120.7	1203900000	118	26.7491	26.9103	26.9033	26.9994	26.6165	26.8357
	1.25441	-1.16545	P46063;F5H2L2;F8WA66;F8WD97;F5H4P4;F5H3W0	P46063	ATP-dependent DNA helicase Q1	RECQL	50.991	452630000	65	26.2614	25.6937	25.6497	24.5327	25.4455	24.1302
	0.158398	0.0844421	P46108;I3L297	P46108	Adapter molecule crk	CRK	103.57	1027800000	96	26.7508	26.7349	26.5212	26.4376	26.7423	27.0804
	0.0831423	-0.0356503	P46109	P46109	Crk-like protein	CRKL	79.109	2226400000	129	27.619	27.9688	27.6217	27.7537	27.8371	27.5117
	0.398722	0.250439	P46776;E9PJD9;E9PLL6;E9PLX7	P46776;E9PJD9;E9PLL6	60S ribosomal protein L27a	RPL27A	22.726	3159700000	59	27.9815	28.1726	28.3295	28.5673	27.9297	28.7378
	0.478153	0.171655	P46777;A0A2R8Y6J3;Q5T7N0;A0A2R8Y4A2;R4GNJ2	P46777;A0A2R8Y6J3	60S ribosomal protein L5	RPL5	96.433	8723500000	193	29.5089	29.6466	29.809	30.0121	29.5773	29.89
	0.0148936	0.0100028	P46778;M0R181;G3V1B3	P46778;M0R181	60S ribosomal protein L21	RPL21	40.637	5771100000	89	29.3263	29.0998	29.079	29.4199	28.7646	29.3507
	0.683654	0.293025	P46783;Q9NQ39	P46783	40S ribosomal protein S10	RPS10	33.033	3420300000	71	28.1606	28.3677	28.4297	28.6971	28.2721	28.8679
	2.2426	0.897104	P46821;D6RA32;D6RA40;D6RGJ3;D6RCL2	P46821	Microtubule-associated protein 1B;MAP1B heavy chain;MAP1 light chain LC1	MAP1B	323.31	78519000000	1544	32.1146	32.5127	32.4152	33.4724	33.0985	33.1628
	0.560317	-0.104596	P46926;D6R9P4;P46926-2;D6RFF8;D6RAY7;D6RB13;D6R917;D6RFK5	P46926;D6R9P4;P46926-2;D6RFF8;D6RAY7	Glucosamine-6-phosphate isomerase 1;Glucosamine-6-phosphate isomerase	GNPDA1	89.637	2729500000	141	28.1001	28.1225	28.0392	28.0558	28.0673	27.8248
	1.29761	-1.31321	P46937-5;P46937-3;P46937-6;P46937-7;P46937-2;P46937-8;P46937;P46937-9;P46937-4;H0YCI3	P46937-5;P46937-3;P46937-6;P46937-7;P46937-2;P46937-8;P46937;P46937-9;P46937-4;H0YCI3	Transcriptional coactivator YAP1	YAP1	85.4	461050000	67	26.1963	25.6983	25.9508	23.8306	25.3943	24.6808
	0.671553	-0.314007	P46940;A0A0J9YXZ5;H0YLE8;H0YKA5;A0A087X225;A0A087WWP1	P46940;A0A0J9YXZ5;H0YLE8	Ras GTPase-activating-like protein IQGAP1	IQGAP1	323.31	12211000000	648	30.7264	30.103	30.2764	29.9944	30.2545	29.9149
	1.00578	0.350229	P46976-2;P46976;G5E9W8;C9JQ42;P46976-3;C9J8R8;C9J7C7	P46976-2;P46976;G5E9W8;C9JQ42;P46976-3	Glycogenin-1	GYG1	106.14	747530000	54	25.7884	25.8853	26.0877	26.29	26.0234	26.4987
	0.516216	-0.194672	P46977;P46977-2;A0A0C4DH80;E9PN73;E9PI32	P46977;P46977-2	Dolichyl-diphosphooligosaccharide--protein glycosyltransferase subunit STT3A	STT3A	132.25	1444800000	88	27.464	27.009	27.1817	27.2112	26.9842	26.8753
	0.722831	-0.247768	P47755;F8W9N7;A0A0D9SET8;C9JUG7;P47755-2;F8WED3	P47755;F8W9N7;A0A0D9SET8;C9JUG7;P47755-2	F-actin-capping protein subunit alpha-2	CAPZA2	323.31	4693400000	168	28.9901	28.8604	28.8799	28.5052	28.9654	28.5164
	0.667412	0.19879	P47756-2;B1AK87;B1AK88;P47756;B1AK85	P47756-2;B1AK87;B1AK88;P47756;B1AK85	F-actin-capping protein subunit beta	CAPZB	72.753	6884700000	132	29.1887	29.2549	29.3495	29.7078	29.2833	29.3983
	0.145312	-0.0412312	P47897;P47897-2;A0A1B0GVU9;B4DDN1;A0A0U1RQT0;C9J165;A0A0U1RQM8;H7C0R3;A0A0U1RQU2;A0A0U1RQE9;A0A0U1RRI9;A0A0U1RQX5;A0A0U1RR66;A0A0U1RQL2;A0A0U1RRC8;A0A0U1RQQ5;F2Z2V6;A0A1B0GTT3;A0A0U1RQX9;A0A0U1RQJ6;A0A0U1RQC3;A0A0U1RRJ7;A0A0U1RR79	P47897;P47897-2;A0A1B0GVU9;B4DDN1	Glutamine--tRNA ligase	QARS	323.31	2277200000	169	27.8837	27.7427	27.824	27.8846	27.5818	27.8604
	1.22295	0.241299	P47985;P0C7P4	P47985;P0C7P4	Cytochrome b-c1 complex subunit Rieske, mitochondrial;Cytochrome b-c1 complex subunit 11;Putative cytochrome b-c1 complex subunit Rieske-like protein 1	UQCRFS1;UQCRFS1P1	143.82	1769700000	80	27.2289	27.1884	27.3717	27.3592	27.5502	27.6035
	0.112611	0.099898	P48047;H7C0C1;H7C068;H7C086	P48047;H7C0C1	ATP synthase subunit O, mitochondrial	ATP5O	72.186	5395100000	77	28.6164	28.798	28.7944	29.3614	28.8779	28.2693
	0.734948	-0.12705	P48147;H0Y5Y0	P48147	Prolyl endopeptidase	PREP	138.78	3159300000	285	28.5053	28.2893	28.3832	28.2516	28.1891	28.356
	0.621176	0.91887	P48431	P48431	Transcription factor SOX-2	SOX2	11.738	272800000	22	23.6439	25.2065	22.9768	24.8287	24.7493	25.0059
	0.689389	0.238852	P48444;B0YIW6;P48444-2;Q6P1Q5;E9PK34	P48444;B0YIW6;P48444-2	Coatomer subunit delta	ARCN1	124.85	3092500000	244	28.2142	28.1113	28.1437	28.344	28.1565	28.6852
	0.880021	-0.410201	P48449;P48449-2;P48449-3;A0A0G2JQD0;C9J315	P48449;P48449-2;P48449-3;A0A0G2JQD0	Lanosterol synthase	LSS	31.204	664170000	66	26.2312	26.1197	26.1612	25.7919	26.1155	25.374
	1.13537	-1.20238	P48634;P48634-2;P48634-3;P48634-4	P48634;P48634-2;P48634-3;P48634-4	Protein PRRC2A	PRRC2A	29.341	194550000	40	24.5563	24.35	24.9684	24.0391	22.5144	23.7141
	0.0730549	-0.0428715	P48637;A0A2R8Y430;A0A2R8Y5T7;P48637-2;A0A2R8Y7I7;A0A2R8Y6Q7;A0A2R8YF34;A0A2R8Y2X9;A0A2R8Y6Y6;A0A2R8Y4V9;A0A2R8Y790;A0A2R8Y446;A0A0S2Z4J7;A0A2R8Y2F2	P48637;A0A2R8Y430;A0A2R8Y5T7;P48637-2	Glutathione synthetase	GSS	77.002	2052600000	160	28.0729	27.5359	27.5112	27.5373	27.6072	27.8468
	1.32587	0.563821	P48643;B7ZAR1;E9PCA1;E7ENZ3;P48643-2;D6RIZ7;H0Y914	P48643;B7ZAR1;E9PCA1;E7ENZ3;P48643-2	T-complex protein 1 subunit epsilon	CCT5	323.31	28021000000	482	30.785	31.0849	31.0544	31.6981	31.1895	31.7282
	0.43505	0.245483	P48681	P48681	Nestin	NES	323.31	18471000000	695	30.3804	30.9823	30.9059	31.2989	30.8125	30.8937
	0.202615	-0.117347	P48723	P48723	Heat shock 70 kDa protein 13	HSPA13	29.002	390340000	43	25.2152	25.3654	25.1041	25.5298	24.931	24.8717
	0.974414	0.325357	P48735;P48735-2;H0YL11	P48735;P48735-2;H0YL11	Isocitrate dehydrogenase [NADP], mitochondrial	IDH2	279.92	13910000000	288	30.061	30.3408	30.2882	30.6493	30.297	30.7198
	0.248377	0.17688	P48739-2;A0A0A0MSW4;P48739	P48739-2;A0A0A0MSW4;P48739	Phosphatidylinositol transfer protein beta isoform	PITPNB	22.072	606590000	46	25.9258	25.8305	25.6249	25.9619	25.5116	26.4384
	0.968899	0.647879	P49006	P49006	MARCKS-related protein	MARCKSL1	243.19	4985600000	124	28.2287	28.6877	28.5464	29.4979	28.5794	29.329
	1.02823	0.350099	P49069;D6RIW3	P49069	Calcium signal-modulating cyclophilin ligand	CAMLG	80.617	289610000	43	24.2798	24.7052	24.487	24.7508	24.7266	25.045
	0.078699	0.0538019	P49189;P49189-2	P49189;P49189-2	4-trimethylaminobutyraldehyde dehydrogenase	ALDH9A1	125.17	5256700000	196	29.3251	28.5337	28.92	29.0845	28.8308	29.0248
	0.506639	0.152886	P49257	P49257	Protein ERGIC-53	LMAN1	186.26	5439600000	194	29.0255	28.7397	29.0233	29.1222	28.9072	29.2178
	0.966498	-0.354104	P49321;P49321-3;P49321-4;P49321-2;Q5T624;E9PI86;E9PPR5;H0YDS9;E9PRH9;H0YF33;E9PPQ8;E9PNB5	P49321;P49321-3;P49321-4;P49321-2;Q5T624	Nuclear autoantigenic sperm protein	NASP	323.31	9151700000	316	29.8551	30.2037	30.1291	29.8558	29.439	29.8309
	0.481191	-0.105029	P49327;A0A0U1RQF0;A0A0U1RRG3;A0A1B0GTR5;J3KTF0	P49327;A0A0U1RQF0	Fatty acid synthase;[Acyl-carrier-protein] S-acetyltransferase;[Acyl-carrier-protein] S-malonyltransferase;3-oxoacyl-[acyl-carrier-protein] synthase;3-oxoacyl-[acyl-carrier-protein] reductase;3-hydroxyacyl-[acyl-carrier-protein] dehydratase;Enoyl-[acyl-carrier-protein] reductase;Oleoyl-[acyl-carrier-protein] hydrolase	FASN	323.31	26873000000	1051	31.3727	31.4042	31.5183	31.4325	31.3866	31.161
	1.56641	0.993181	P49366;A0A087WZK0;P49366-2;Q5J8M5;P49366-3;M0R253;M0QX43;A0A3B3IU31;B4E3M2;M0R1T4;M0R1T2;M0R264;M0R0V2;M0QXT2;M0R0J4;M0QYZ7	P49366;A0A087WZK0;P49366-2;Q5J8M5;P49366-3	Deoxyhypusine synthase	DHPS	65.424	445390000	70	24.525	24.9259	25.2116	25.5107	25.8827	26.2488
	1.65445	0.294084	P49368;B4DUR8;P49368-2;E9PRC8;Q5SZX6;E9PQ35;E9PM09;Q5SZX9;Q5SZW8	P49368;B4DUR8;P49368-2	T-complex protein 1 subunit gamma	CCT3	251.19	18983000000	395	30.488	30.626	30.7307	30.9894	30.8639	30.8737
	1.30179	-1.7804	P49407-2;P49407;H0YET9;E9PM35	P49407-2;P49407;H0YET9	Beta-arrestin-1	ARRB1	15.262	218390000	25	25.385	24.8209	25.1119	22.8946	24.5476	22.5344
	1.00363	0.401923	P49411;H3BNU3	P49411	Elongation factor Tu, mitochondrial	TUFM	289.18	10534000000	341	29.3334	29.6918	29.8632	30.1162	29.8234	30.1546
	0.946607	1.25977	P49418-2;P49418;H0Y7T8	P49418-2;P49418	Amphiphysin	AMPH	29.159	250280000	40	24.264	24.4524	22.5636	25.3476	24.8477	24.864
	0.432263	-0.150253	P49419-2;A0A1B0GTG2;A0A1B0GW77;P49419;A0A1B0GUA1;A0A1B0GW82;A0A1B0GTY9;P49419-4;A0A1B0GTJ4;A0A1B0GV49;A0A0J9YWF7;A0A1B0GUY0;H0YHM6;F8WDY6;F8VVF2;A0A1B0GVU0	P49419-2;A0A1B0GTG2;A0A1B0GW77;P49419;A0A1B0GUA1;A0A1B0GW82;A0A1B0GTY9;P49419-4;A0A1B0GTJ4;A0A1B0GV49;A0A0J9YWF7	Alpha-aminoadipic semialdehyde dehydrogenase	ALDH7A1	208.48	8530500000	300	29.5758	29.8648	29.9456	29.6913	29.7863	29.4578
	0.295864	0.145311	P49458;E9PE20;P49458-2	P49458;E9PE20;P49458-2	Signal recognition particle 9 kDa protein	SRP9	49.281	3730400000	59	28.1624	28.5931	28.622	28.7961	28.35	28.6673
	0.639619	-0.116988	P49588;P49588-2;H3BPK7	P49588;P49588-2	Alanine--tRNA ligase, cytoplasmic	AARS	323.31	11324000000	470	30.375	30.1295	30.164	30.1288	30.0457	30.1431
	0.117249	0.060358	Q5T5C7;P49591	Q5T5C7;P49591	Serine--tRNA ligase, cytoplasmic	SARS	174.46	4268200000	237	28.5392	28.7861	28.7623	28.4662	29.0549	28.7476
	0.0913236	-0.0854257	P49674;B0QY36;B0QY35;B0QY34;H7BYT1;P48730-2;P48730;H0Y2N6;J3QQI9;H0Y645;H0Y5S9;B4DLF1;H0Y682	P49674;B0QY36;B0QY35;B0QY34;H7BYT1;P48730-2;P48730;H0Y2N6;J3QQI9;H0Y645	Casein kinase I isoform epsilon;Casein kinase I isoform delta	CSNK1E;CSNK1D	10.231	44016000	22	22.9286	22.1388	23.125	22.8209	22.3635	22.7517
	1.46688	-0.0934099	P49720;A0A087WXQ8;A0A087WY10;A0A087WUL2	P49720;A0A087WXQ8;A0A087WY10;A0A087WUL2	Proteasome subunit beta type-3	PSMB3	307.43	6654400000	131	29.3935	29.4722	29.398	29.3151	29.3109	29.3574
	0.428801	0.14568	P49721;A0A087WVV1	P49721	Proteasome subunit beta type-2	PSMB2	122.25	4111000000	145	28.6589	28.5645	28.5912	28.9666	28.4816	28.8035
	0.879698	-0.913435	P49736;H0Y8E6;H7C4N9;C9JZ21;F8WDM3	P49736;H0Y8E6	DNA replication licensing factor MCM2	MCM2	70.177	742300000	100	26.6623	26.8972	26.2313	26.379	25.8097	24.8618
	1.37387	-0.378442	P49748-2;P49748;P49748-3;G3V1M7;K7EQP4;K7EJW8;J3QRJ8;J3KSR4;J3KS89;J3QKU9;K7EMF8	P49748-2;P49748;P49748-3	Very long-chain specific acyl-CoA dehydrogenase, mitochondrial	ACADVL	124.57	1818400000	156	27.7563	27.6973	27.6772	27.1984	27.5845	27.2126
	0.559142	0.382877	P49750;P49750-1;P49750-3;F8VU51;H0YIQ2;H0YI23;U3KQT9	P49750;P49750-1;P49750-3;F8VU51;H0YIQ2	YLP motif-containing protein 1	YLPM1	71.091	595410000	103	25.1999	25.8639	25.4977	26.2353	25.4484	26.0264
	0.157843	-0.07083	P49755;G3V2K7	P49755;G3V2K7	Transmembrane emp24 domain-containing protein 10	TMED10	102.47	6719100000	137	29.5128	29.39	29.1927	29.0566	29.2854	29.5411
	0.8178	0.519419	P49756;P49756-2;P49756-3;E9PQU5;H0YE46	P49756;P49756-2;P49756-3	RNA-binding protein 25	RBM25	58.352	659830000	51	25.1909	25.9711	25.9164	26.1439	25.9889	26.5039
	0.145611	-0.0651786	P49773;D6REP8;D6RE99;D6RD60;D6RC06	P49773	Histidine triad nucleotide-binding protein 1	HINT1	133.56	5364900000	109	28.8986	29.1216	29.2064	29.14	28.7331	29.1578
	0.130043	0.127216	P49790;P49790-3;P49790-2	P49790;P49790-3;P49790-2	Nuclear pore complex protein Nup153	NUP153	88.411	253810000	64	24.2904	24.4425	24.7798	25.0505	24.8613	23.9825
	1.19504	-0.171848	P49792;F8WBP7	P49792	E3 SUMO-protein ligase RanBP2	RANBP2	255.07	1612000000	261	27.2736	27.2825	27.3317	27.2228	27.0011	27.1483
	0.132633	0.0912107	P49840;A8MT37;M0QYV0	P49840;A8MT37;M0QYV0	Glycogen synthase kinase-3 alpha	GSK3A	38.024	362000000	54	24.839	24.6545	25.3747	25.001	25.2956	24.8453
	0.766487	0.194954	P49902;P49902-2;Q5JUV4;Q5JUV6;Q5JUV3;H0YHR8;S4R3E7;S4R3A6	P49902;P49902-2;Q5JUV4	Cytosolic purine 5-nucleotidase	NT5C2	28.497	386270000	47	25.0583	25.0873	24.8908	25.0717	25.1478	25.4018
	0.208554	-0.0604165	P49903;P49903-4;P49903-2;P49903-3;Q5T5U6;Q5T5U7	P49903;P49903-4;P49903-2;P49903-3	Selenide, water dikinase 1	SEPHS1	201.64	2255700000	126	27.6497	27.9953	27.8448	27.677	27.8516	27.7799
	0.0757323	0.0350787	P49915;P49915-2	P49915;P49915-2	GMP synthase [glutamine-hydrolyzing]	GMPS	246.57	4382400000	237	28.6754	28.7631	28.7835	29.0584	28.5066	28.7623
	1.73299	-0.693211	P50120;D6RB89;D6RGE6	P50120;D6RB89	Retinol-binding protein 2	RBP2	30.178	492510000	23	26.223	26.4151	26.1898	25.3553	25.486	25.9069
	1.00176	0.332625	P50148;B1AM21	P50148	Guanine nucleotide-binding protein G(q) subunit alpha	GNAQ	123.5	2318600000	131	27.7682	27.6995	27.5007	27.9043	27.8116	28.2504
	1.74893	0.818103	P50213;H0YL72;P50213-2;H0YLI6;H0YMU3;H0YKD0;H0YM64;H0YNF5;H0YM46	P50213;H0YL72;P50213-2;H0YLI6;H0YMU3;H0YKD0	Isocitrate dehydrogenase [NAD] subunit alpha, mitochondrial	IDH3A	109.68	1269900000	64	26.1184	26.4678	26.3848	27.1342	26.8294	27.4617
	1.22268	-1.45618	P50225;H3BRY5;P50226;H3BQX5;E9PKR8;A0A0A6YYL2;P0DMN0;P0DMM9;P0DMM9-3;E9PM76;E9PKW4;P50225-2;H3BNY7;P0DMM9-2;H3BPL6	P50225;H3BRY5;P50226;H3BQX5;E9PKR8;A0A0A6YYL2;P0DMN0;P0DMM9;P0DMM9-3	Sulfotransferase 1A1;Sulfotransferase;Sulfotransferase 1A2;Sulfotransferase 1A4;Sulfotransferase 1A3	SULT1A1;SULT1A2;SULT1A4;SULT1A3	36.097	179550000	24	25.9638	24.8756	24.6645	23.0287	24.3744	23.7323
	1.33561	0.185013	P50395;P50395-2;Q5SX87;Q5SX86;Q5SX91;V9GYF8;Q5SX90;V9GYJ7	P50395;P50395-2;Q5SX87	Rab GDP dissociation inhibitor beta	GDI2	323.31	45167000000	450	31.996	32.0509	32.0938	32.3093	32.1177	32.2688
	1.0854	0.387161	P50402;Q5HY57;F8WEQ1	P50402;Q5HY57	Emerin	EMD	73.35	764370000	90	26.3232	26.1228	25.8152	26.3246	26.5949	26.5031
	0.388228	0.236207	P50440-3;P50440-2;P50440;H0YMX4;H0YN43;H0YLC6	P50440-3;P50440-2;P50440	Glycine amidinotransferase, mitochondrial	GATM	31.312	399500000	62	25.3283	25.5579	25.1511	25.168	25.6243	25.9536
	0.425606	-0.260714	P50453;P50452-3;C9J7N5;A0A0C4DGW9;P30740-2;P30740;O75830	P50453	Serpin B9	SERPINB9	166.57	4046200000	179	29.2213	28.5187	28.8719	28.801	28.7477	28.2811
	0.970454	-0.641883	P50454;E9PPV6;E9PR70;E9PKH2;E9PK86;E9PMI5;E9PNX1;E9PQ34;E9PJH8;E9PIG2;E9PRS3;H0YEP8;E9PLA6	P50454;E9PPV6;E9PR70;E9PKH2;E9PK86;E9PMI5	Serpin H1	SERPINH1	269.95	76079000000	454	33.4762	32.768	33.1648	32.1801	32.9481	32.3551
	0.793285	0.339387	P50502;Q3KNR6;H7C3I1;Q8NFI4;F6VDH7;Q8IZP2;F8WAQ7	P50502;Q3KNR6;H7C3I1;Q8NFI4;F6VDH7;Q8IZP2	Hsc70-interacting protein;Putative protein FAM10A5;Putative protein FAM10A4	ST13;ST13P5;ST13P4	149.15	12900000000	183	29.9076	29.9496	30.2509	30.5706	30.0466	30.5091
	0.24053	-0.237094	P50552;K7ENL7;K7ENR7;K7EQD0;K7EIG8;K7EM16	P50552;K7ENL7	Vasodilator-stimulated phosphoprotein	VASP	13.836	238390000	23	24.7317	24.5759	24.6761	24.5647	23.6967	25.0112
	0.941473	-0.30725	P50570-2;P50570-5;P50570;H7C5U0;K7EPK9	P50570-2;P50570-5;P50570	Dynamin-2	DNM2	111.42	2077600000	168	27.8357	27.7073	27.9115	27.4178	27.7871	27.3278
	0.459623	0.765275	P50583	P50583	Bis(5-nucleosyl)-tetraphosphatase [asymmetrical]	NUDT2	26.416	302810000	21	23.132	25.0754	25.345	25.0127	25.6116	25.2239
	1.60374	-0.862518	P50895;A0A087WXM8;K7ENU8;K7ERB7	P50895;A0A087WXM8	Basal cell adhesion molecule	BCAM	43.382	494210000	56	26.1469	25.6375	26.1396	24.8452	25.0371	25.4542
	1.35497	0.308055	P50990;P50990-2;P50990-3;H7C4C8;H7C2U0	P50990;P50990-2;P50990-3	T-complex protein 1 subunit theta	CCT8	293.91	26200000000	413	30.9381	31.0058	31.1827	31.4844	31.2167	31.3496
	1.25716	0.452877	P50991;P50991-2	P50991;P50991-2	T-complex protein 1 subunit delta	CCT4	323.31	20591000000	408	30.3404	30.7173	30.8383	31.1798	30.9298	31.145
	0.289043	-0.180068	P50995-2;P50995;H0Y6E1;E5RIN3;P27216;P27216-2	P50995-2;P50995	Annexin A11	ANXA11	21.317	190630000	41	24.4198	24.3601	24.5081	24.6896	24.2269	23.8312
	0.721318	0.467075	P51116;I3L1Z2	P51116	Fragile X mental retardation syndrome-related protein 2	FXR2	26.099	110160000	32	23.2937	23.3239	23.3305	24.0737	23.1911	24.0845
	0.428664	-0.214437	P51148;P51148-2;K7ERI8;K7ERQ8;K7ENY4;F8VVK3;F8VVZ0	P51148;P51148-2;K7ERI8;K7ERQ8;K7ENY4;F8VVK3;F8VVZ0	Ras-related protein Rab-5C	RAB5C;RAB5B	81.502	3777400000	103	28.7444	28.4269	28.3686	28.1832	28.6504	28.0631
	0.843941	-0.209639	P51149;C9J592;C9J8S3;C9IZZ0;C9J4V0;C9J4S4;C9J7D1	P51149;C9J592;C9J8S3	Ras-related protein Rab-7a	RAB7A	323.31	7845200000	167	29.8025	29.6814	29.7703	29.3823	29.7515	29.4915
	0.443692	-0.181882	P51397;B4DQ75	P51397	Death-associated protein 1	DAP	13.77	324080000	20	24.8952	25.3234	25.2529	24.8217	24.9016	25.2025
	2.63284	-0.825254	P51398-2;P51398-3;P51398;V9GZ03;V9GYL9;V9GYW1;V9GYA7;V9GZ61;V9GYC9;V9GYJ9;V9GYF7;V9GY11	P51398-2;P51398-3;P51398;V9GZ03;V9GYL9;V9GYW1;V9GYA7	28S ribosomal protein S29, mitochondrial	DAP3	16.265	102780000	24	23.8986	23.9394	23.5962	22.8944	23.072	22.992
	2.85888	0.851027	P51452;P51452-2;K7ES89;K7ELG5	P51452;P51452-2;K7ES89	Dual specificity protein phosphatase 3	DUSP3	30.919	913640000	67	25.9645	25.901	25.8077	26.7236	26.5832	26.9195
	1.11925	0.687204	P51513-5;P51513-3;P51513-4;P51513;I3L2B5;F8W659;J3KQU3;P51513-2;F8VYI3;F8VWX1;G8JLA5	P51513-5;P51513-3;P51513-4;P51513;I3L2B5;F8W659;J3KQU3;P51513-2	RNA-binding protein Nova-1	NOVA1	19.414	218210000	42	24.7934	24.173	24.204	24.8678	24.8739	25.4903
	0.230116	0.111534	P51553;P51553-2;G5E9Q7;E7EQB8;H0Y5Q7;E9PF84;H7C1W2	P51553;P51553-2;G5E9Q7;E7EQB8	Isocitrate dehydrogenase [NAD] subunit gamma, mitochondrial;Isocitrate dehydrogenase [NAD] subunit, mitochondrial	IDH3G	31.317	145800000	37	23.69	23.3507	23.8364	23.5831	23.6458	23.9828
	1.09778	-0.248119	P51570;P51570-2;K7ERJ9;K7EII7;K7ERN9	P51570;P51570-2	Galactokinase	GALK1	131.43	1480500000	119	27.3279	27.2752	27.2806	27.1595	27.1431	26.8368
	0.116524	-0.110776	P51571;A6NLM8	P51571	Translocon-associated protein subunit delta	SSR4	24.003	1403600000	69	27.8443	26.7918	26.9353	27.2248	26.8769	27.1373
	0.945104	0.662831	P51572;P51572-2;A0A2R8Y5M6;C9JQ75;C9J0M4;C9JSP1;C9JMD7;C9JM14	P51572;P51572-2;A0A2R8Y5M6;C9JQ75;C9J0M4;C9JSP1	B-cell receptor-associated protein 31	BCAP31	67.16	2928800000	143	27.4969	27.6826	27.8724	28.3808	27.7942	28.8653
	1.35226	-0.246195	P51580	P51580	Thiopurine S-methyltransferase	TPMT	7.0599	175560000	28	24.0092	23.8874	24.0655	23.8652	23.7228	23.6356
	0.108271	0.056804	P51610;A6NEM2;P51610-4;P51610-2;P51610-3;H7C1C4	P51610;A6NEM2;P51610-4;P51610-2	Host cell factor 1;HCF N-terminal chain 1;HCF N-terminal chain 2;HCF N-terminal chain 3;HCF N-terminal chain 4;HCF N-terminal chain 5;HCF N-terminal chain 6;HCF C-terminal chain 1;HCF C-terminal chain 2;HCF C-terminal chain 3;HCF C-terminal chain 4;HCF C-terminal chain 5;HCF C-terminal chain 6	HCFC1	178.82	3059800000	262	28.0251	28.2417	28.3308	28.3311	27.9377	28.4993
	0.339559	-0.133753	P51648;P51648-2;J3QRD1;I3L1M4;J3KTD9;I3L2W1;J3QS00;J3QKK9;K7EN73;J3KTG1;E9PJV0;C9JGJ2;I3L0X1;C9JKT2;C9JMC5;I3L3I9;A8MYB8;E9PNN6;P48448;P43353-2;P30838;P43353	P51648;P51648-2;J3QRD1	Fatty aldehyde dehydrogenase	ALDH3A2	53.608	1301400000	92	27.2397	27.0425	27.0467	26.9239	26.7473	27.2565
	1.7469	0.886197	P51649;P51649-2;C9J8Q5	P51649;P51649-2;C9J8Q5	Succinate-semialdehyde dehydrogenase, mitochondrial	ALDH5A1	113.89	1309400000	90	26.0965	26.6482	26.453	27.302	26.9971	27.5572
	0.155069	-0.0545858	P51659;A0A2R8YD50;E7EWE5;P51659-3;P51659-2;G5E9S2;E7ET17;A0A2R8Y7L2;E7EPL9;E7ER27;A0A2R8YDT8;A0A2R8YF45;A0A2R8Y7W2;A0A2R8YF39;A0A2R8YEG2	P51659;A0A2R8YD50;E7EWE5;P51659-3;P51659-2;G5E9S2;E7ET17;A0A2R8Y7L2;E7EPL9;E7ER27	Peroxisomal multifunctional enzyme type 2;(3R)-hydroxyacyl-CoA dehydrogenase;Enoyl-CoA hydratase 2	HSD17B4	293.62	5562000000	303	29.0979	29.1131	29.2206	29.2565	28.8427	29.1687
	0.637007	0.262881	P51665;H3BNT7;H3BTM8;H3BQV2	P51665;H3BNT7;H3BTM8	26S proteasome non-ATPase regulatory subunit 7	PSMD7	149.86	3504000000	136	28.0278	28.315	28.3131	28.7387	28.1886	28.5172
	1.40443	1.61447	P51674;P51674-3;P51674-2;D6R9D2;D6R9T7	P51674;P51674-3;P51674-2	Neuronal membrane glycoprotein M6-a	GPM6A	57.586	703210000	47	23.8851	25.3368	24.7795	26.7013	25.633	26.5105
	0.698368	-1.60277	P51688;I3NI22;I3L4B7;I3L2L4;I3L2I6	P51688	N-sulphoglucosamine sulphohydrolase	SGSH	28.538	417120000	29	25.744	25.6409	25.6494	22.7306	23.3607	26.1348
	1.12465	-0.704625	P51812;B1AXG1;B7ZB17;B4DG22;A0A2R8Y603;F2Z2J1;Q15349;Q15349-3;Q9UK32-2;Q9UK32;Q15349-2;B7Z3B5;A0A2R8Y7S9;B1AXG2;A0A2R8YGB7;D6RHW7;D6R910;D6RA62;D6RE03;Q5SVM6;V9GXZ1;E7ERL6;Q96GX5-2;Q96GX5-3;Q96GX5;O60307;Q9Y2H9;Q6P0Q8-2;Q6P0Q8;O15021-2;O15021-3;O15021-6;O15021	P51812;B1AXG1;B7ZB17;B4DG22	Ribosomal protein S6 kinase alpha-3	RPS6KA3	47.763	888070000	94	27.0593	26.5445	26.9213	25.9282	26.6374	25.8456
	0.237405	-0.0320791	P51858;P51858-2;P51858-3	P51858;P51858-2;P51858-3	Hepatoma-derived growth factor	HDGF	193.92	8136400000	130	29.5462	29.6937	29.6579	29.6581	29.5627	29.5809
	0.456973	-0.49254	P51884;CON__Q05443	P51884	Lumican	LUM	75.554	4058000000	122	29.5968	28.4654	28.3055	28.0875	28.7479	28.0547
	0.0150104	-0.00807254	P51970	P51970	NADH dehydrogenase [ubiquinone] 1 alpha subcomplex subunit 8	NDUFA8	40.898	602550000	37	25.8456	26.0567	25.952	26.21	25.6347	25.9854
	0.33977	0.342901	P51991;H7C1J8	P51991	Heterogeneous nuclear ribonucleoprotein A3	HNRNPA3	283.47	11113000000	239	29.2517	30.1493	30.2372	30.5168	29.6753	30.4748
	0.476928	0.209152	P52209-2;P52209;K7EM49;K7EPF6;K7EMN2;K7ELN9	P52209-2;P52209	6-phosphogluconate dehydrogenase, decarboxylating	PGD	323.31	23890000000	291	30.8618	31.3329	31.0694	31.318	31.0574	31.5161
	0.656368	-0.744143	P52292;J3QLL0;J3KS65	P52292	Importin subunit alpha-1	KPNA2	27.792	317780000	40	24.934	25.3763	25.5906	24.549	23.7364	25.383
	0.244636	-0.164034	P52294;C9JYI4;C9J352;C9JWD9;F2Z3G4;C9J4U1	P52294;C9JYI4	Importin subunit alpha-5;Importin subunit alpha-5, N-terminally processed	KPNA1	60.269	868220000	71	26.3737	26.4219	26.3209	26.6203	26.2859	25.7182
	0.196499	0.0886841	P52306;P52306-2;P52306-5;P52306-6;P52306-3;P52306-4;H0Y8M2;D6RHH8;D6RHZ7;D6RB97;D6RBC6;D6REZ0;D6RC12	P52306;P52306-2;P52306-5;P52306-6;P52306-3;P52306-4	Rap1 GTPase-GDP dissociation stimulator 1	RAP1GDS1	156.07	1551600000	139	27.3077	27.1732	27.0331	27.0445	27.559	27.1766
	0.456896	0.335782	P52564;P52564-2;K7EIW3;A0A0A0MRF7;K7ELM6	P52564;P52564-2	Dual specificity mitogen-activated protein kinase kinase 6	MAP2K6	37.954	493690000	49	25.0584	25.3844	25.4491	26.0357	25.0629	25.8007
	0.520815	0.138016	P52565;J3KTF8;J3QQX2;J3KRE2;P52565-2;J3KRY1;J3KS60	P52565;J3KTF8;J3QQX2;J3KRE2;P52565-2;J3KRY1	Rho GDP-dissociation inhibitor 1	ARHGDIA	110.07	5539100000	156	29.1768	28.9629	29.0876	29.0243	29.2617	29.3553
	1.03222	0.326235	P52594-2;P52594-3;P52594;P52594-4;B8ZZY2;C9J2I0;A0A0C4DG34;O95081-2;O95081	P52594-2;P52594-3;P52594;P52594-4;B8ZZY2	Arf-GAP domain and FG repeat-containing protein 1	AGFG1	134.95	509650000	72	25.2627	25.4189	25.6939	25.9359	25.7451	25.6733
	0.471067	-0.111701	P52597;A0A1B0GW42	P52597	Heterogeneous nuclear ribonucleoprotein F;Heterogeneous nuclear ribonucleoprotein F, N-terminally processed	HNRNPF	160.65	2184700000	115	27.7691	27.8725	27.6276	27.6484	27.5143	27.7715
	3.2929	-0.582748	P52701;P52701-2;P52701-3;A0A087WWJ1;P52701-4;C9JH55;C9J8Y8;C9J7Y7;F8WAX8;A0A087WYT6;U3KQ72;F8W7G9	P52701;P52701-2;P52701-3;A0A087WWJ1;P52701-4	DNA mismatch repair protein Msh6	MSH6	116.91	1875900000	179	27.7607	27.8124	27.8361	27.3162	27.2083	27.1363
	1.32114	0.700392	P52758;H0YB34;H0YBX3	P52758;H0YB34;H0YBX3	Ribonuclease UK114	HRSP12	43.533	1977800000	57	26.6068	27.2382	27.1424	27.6459	27.4622	27.9804
	0.0737209	0.0555649	P52788;P52788-2;H7C2R7	P52788;P52788-2;H7C2R7	Spermine synthase	SMS	133.65	1454500000	123	27.1382	27.2281	27.178	26.7478	27.3132	27.65
	0.0998785	-0.0897586	P52888;K7EP46;K7EKB6;K7EIK4;K7EMU4;K7EL32;K7EL02;P52888-2	P52888;K7EP46	Thimet oligopeptidase	THOP1	19.455	392250000	55	24.8386	25.2262	25.2109	25.4776	25.0715	24.4574
	0.443462	-0.117043	P52907	P52907	F-actin-capping protein subunit alpha-1	CAPZA1	310.57	5970300000	167	29.5033	29.2093	29.2404	29.2634	29.2668	29.0717
	1.29418	0.464009	P52943;P52943-2;H0YFA4;H0YHD8	P52943;P52943-2;H0YFA4	Cysteine-rich protein 2	CRIP2	71.952	2076400000	76	26.9849	27.4667	27.365	27.8678	27.5853	27.7556
	1.51565	-0.684006	P52948-2;P52948-5;P52948;P52948-6;A0A3B3ITD8;H7C3P6;P52948-4;P52948-3;H0YEN4;H0YCT1;H0YCR0;H0YDA1	P52948-2;P52948-5;P52948;P52948-6;A0A3B3ITD8;H7C3P6	Nuclear pore complex protein Nup98-Nup96;Nuclear pore complex protein Nup98;Nuclear pore complex protein Nup96	NUP98	57.453	284720000	60	25.4037	25.3937	25.003	24.9056	24.4125	24.4302
	2.19698	0.538001	P53004;C9J1E1	P53004	Biliverdin reductase A	BLVRA	117.24	1756500000	90	27.2554	27.0221	26.9836	27.5765	27.5584	27.7402
	0.641262	0.36602	P53007;B4DP62	P53007;B4DP62	Tricarboxylate transport protein, mitochondrial	SLC25A1	75.605	2830100000	91	27.7259	27.8295	27.9128	28.4337	27.6851	28.4475
	0.866953	0.203379	P53041;H0YDU8;A8MU39	P53041;H0YDU8;A8MU39	Serine/threonine-protein phosphatase 5;Serine/threonine-protein phosphatase	PPP5C	133.64	1832400000	121	27.1789	27.3393	27.3555	27.5407	27.3147	27.6285
	0.904995	-0.7165	P53367;P53367-2;P53367-3	P53367;P53367-2	Arfaptin-1	ARFIP1	34.942	193110000	39	24.5766	24.307	24.3948	24.3797	23.1428	23.6064
	0.0369369	-0.0142136	P53396;P53396-2;P53396-3;K7ESG8;K7EIE7	P53396;P53396-2;P53396-3	ATP-citrate synthase	ACLY	231.39	7933600000	438	29.6004	29.369	29.6374	29.4446	29.7193	29.4002
	0.0645964	-0.0701822	P53582;H0YAI3;H0Y903;H0Y955	P53582	Methionine aminopeptidase 1	METAP1	9.086	168510000	20	23.8421	24.1347	24.3689	24.7307	23.7847	23.6199
	0.35143	0.167936	P53597;H7C233	P53597	Succinyl-CoA ligase [ADP/GDP-forming] subunit alpha, mitochondrial	SUCLG1	59.899	2540300000	132	27.974	27.6301	27.6771	27.9321	27.6376	28.2153
	0.231411	0.0806802	P53602;H3BP35;H3BQ47;H3BRZ1;H3BVC4	P53602;H3BP35	Diphosphomevalonate decarboxylase	MVD	96.307	1719600000	138	27.5386	27.144	27.3205	27.3138	27.5624	27.369
	0.236955	-0.0823415	P53618;E9PP73;E9PP63;E9PKQ1	P53618;E9PP73	Coatomer subunit beta	COPB1	261.09	6756700000	314	29.5859	29.181	29.3905	29.4445	29.2205	29.2454
	0.755848	-0.283578	P53621;P53621-2;A0A3B3IT15;A0A3B3IS84;A0A3B3ISC6;A0A3B3IU89;A0A3B3ISK1;A0A3B3ITI7	P53621;P53621-2;A0A3B3IT15;A0A3B3IS84;A0A3B3ISC6;A0A3B3IU89	Coatomer subunit alpha;Xenin;Proxenin	COPA	223.7	5769500000	341	29.5845	29.0421	29.2589	29.0489	29.1097	28.8761
	1.33141	-0.610188	P53634;H0YCY8;P53634-2;P53634-3	P53634	Dipeptidyl peptidase 1;Dipeptidyl peptidase 1 exclusion domain chain;Dipeptidyl peptidase 1 heavy chain;Dipeptidyl peptidase 1 light chain	CTSC	176.81	3712000000	178	28.8205	28.8376	28.933	27.8935	28.2407	28.6262
	0.127669	-0.336246	P53985;Q5T8R3;Q5T8R5;P53985-2	P53985	Monocarboxylate transporter 1	SLC16A1	32.642	302210000	32	24.5918	24.9252	24.8696	25.0091	22.5906	25.7782
	0.49662	0.256202	P53990;P53990-2;P53990-4;P53990-5;H3BMU1;H3BUI0;P53990-3;H3BQF7;J3KR23;F5GXM3;P53990-6;H3BPP6;H3BRE2;H3BQ38;E9PF00	P53990;P53990-2;P53990-4;P53990-5;H3BMU1;H3BUI0;P53990-3;H3BQF7;J3KR23	IST1 homolog	IST1	66.307	1988100000	72	27.5282	27.4616	27.5057	27.7376	27.375	28.1515
	0.205375	0.0903479	P53992;G5EA31;P53992-2;A0A0U1RR49	P53992;G5EA31	Protein transport protein Sec24C	SEC24C	70.731	1868300000	131	27.398	27.2857	27.5983	27.7828	27.4794	27.2908
	0.635999	-0.302387	P53999;D6RC37;D6R970	P53999	Activated RNA polymerase II transcriptional coactivator p15	SUB1	46.553	2121900000	68	28.1142	27.4135	27.8963	27.4023	27.5927	27.5218
	0.39523	-0.113421	P54136;P54136-2;E5RJM9;E5RH09	P54136;P54136-2	Arginine--tRNA ligase, cytoplasmic	RARS	177.45	5475600000	341	29.2832	29.0614	29.0689	29.1908	29.0277	28.8547
	1.20284	1.60351	P54289-3;P54289-2;P54289-4;P54289-5;P54289;H0Y715;E7ERK3	P54289-3;P54289-2;P54289-4;P54289-5;P54289	Voltage-dependent calcium channel subunit alpha-2/delta-1;Voltage-dependent calcium channel subunit alpha-2-1;Voltage-dependent calcium channel subunit delta-1	CACNA2D1	92.72	591790000	81	25.0273	25.8179	23.7385	26.3423	26.2716	26.7804
	0.894661	0.216543	P54577;A0A0C4DGZ5	P54577;A0A0C4DGZ5	Tyrosine--tRNA ligase, cytoplasmic;Tyrosine--tRNA ligase, cytoplasmic, N-terminally processed;Tyrosine--tRNA ligase	YARS	169.1	8378000000	271	29.7282	29.4545	29.5777	29.8772	29.6426	29.8903
	0.795756	-0.170537	P54578;P54578-2;A6NJA2;P54578-3;J3QQT6;J3KS55	P54578;P54578-2;A6NJA2;P54578-3	Ubiquitin carboxyl-terminal hydrolase 14;Ubiquitin carboxyl-terminal hydrolase	USP14	323.31	4299100000	217	28.8559	28.86	28.8617	28.5134	28.856	28.6965
	0.527581	-0.345418	P54619;P54619-2;P54619-3;F8VYY9;H0YIC9;H0YHF8;F8VPF5;F8VVA3;F8VZX1;F8VSH3;F8VRY2;F8VSL2;E9PGP6;Q9UGJ0-2;Q9UGJ0-3;Q9UGJ0;F8W046;C9JUG1	P54619;P54619-2;P54619-3;F8VYY9	5-AMP-activated protein kinase subunit gamma-1	PRKAG1	53.476	691800000	73	26.2897	26.1826	26.1627	25.8689	26.3593	25.3706
	2.61488	-0.877132	P54687-4;P54687;P54687-5;P54687-3;P54687-2;F5H2F2;A0A087WYF2	P54687-4;P54687;P54687-5;P54687-3;P54687-2	Branched-chain-amino-acid aminotransferase, cytosolic	BCAT1	47.401	2147900000	63	28.4361	28.2247	28.1718	27.3346	27.5974	27.2692
	0.436803	0.106752	P54709;P54709-2;C9JA36;C9JXZ1;H7C4L9;H7C547;F8WBY4	P54709;P54709-2;C9JA36;C9JXZ1	Sodium/potassium-transporting ATPase subunit beta-3	ATP1B3	39.688	1422400000	91	27.1062	26.9167	26.976	27.2166	27.1713	26.9312
	0.553458	0.391008	P54725-3;P54725;P54725-2;K7ENJ0;K7ELW1;K7EQ16	P54725-3;P54725;P54725-2;K7ENJ0;K7ELW1	UV excision repair protein RAD23 homolog A	RAD23A	40.954	732050000	43	26.0688	25.8575	25.7889	26.4707	25.7091	26.7083
	0.550083	0.27666	P54727;P54727-2;Q5W0S5;Q5W0S4;H0Y579	P54727;P54727-2	UV excision repair protein RAD23 homolog B	RAD23B	196.92	4065600000	122	28.8248	28.3143	28.3276	28.9109	28.4734	28.9123
	0.993369	-0.31599	P54803-4;P54803;P54803-5;A0A087WX10;P54803-3;G3V5E8;G3V4M2;G3V255	P54803-4;P54803;P54803-5;A0A087WX10;P54803-3;G3V5E8	Galactocerebrosidase	GALC	17.622	516560000	49	25.9513	25.8129	25.7128	25.6066	25.6743	25.2483
	1.56423	-0.687874	P54886;P54886-2	P54886;P54886-2	Delta-1-pyrroline-5-carboxylate synthase;Glutamate 5-kinase;Gamma-glutamyl phosphate reductase	ALDH18A1	188.71	2382800000	182	28.2742	28.1347	28.1799	27.1832	27.867	27.475
	1.65623	0.470911	P54920;M0R0Y2;M0R2M1;M0R058;M0R027;M0R0I4;M0R213;M0QZM9;M0QZN5;M0R031	P54920;M0R0Y2;M0R2M1	Alpha-soluble NSF attachment protein	NAPA	213.88	2260100000	160	27.2863	27.5714	27.692	28.0785	27.9691	27.915
	0.269007	0.131282	P55010;H0YLZ1;H0YN40;H0YMJ8;H0YM54;H0YK11;H0YK29	P55010	Eukaryotic translation initiation factor 5	EIF5	63.313	1556600000	110	27.0865	27.5806	27.1016	27.2983	27.2604	27.6038
	0.0134371	0.00617091	P55036;Q5VWC4;P55036-2;A6PVX3;H0Y3Y9;H0Y561	P55036;Q5VWC4;P55036-2;A6PVX3	26S proteasome non-ATPase regulatory subunit 4	PSMD4	172.92	2847400000	117	28.1103	27.9985	28.1914	28.3801	27.9095	28.0292
	0.469025	-0.120646	P55060;P55060-3;P55060-4;P55060-2	P55060;P55060-3;P55060-4	Exportin-2	CSE1L	323.31	8712100000	334	29.6898	29.9333	29.5855	29.5609	29.587	29.6988
	0.823315	0.0916354	P55072;C9JUP7;C9IZA5	P55072	Transitional endoplasmic reticulum ATPase	VCP	323.31	39487000000	752	31.857	31.9176	31.7692	31.9861	31.9444	31.8882
	0.39103	0.164407	P55084-2;P55084;F5GZQ3;B5MD38;C9JEY0;C9JE81;C9K0M0	P55084-2;P55084;F5GZQ3;B5MD38	Trifunctional enzyme subunit beta, mitochondrial;3-ketoacyl-CoA thiolase	HADHB	227.41	4434400000	250	28.8065	28.6062	28.6527	28.538	29.1053	28.9154
	1.18143	-0.314908	P55196;P55196-5;A8MQ02;J3KN01;P55196-3;Q5TIG5;P55196-2;P55196-6;P55196-1;H0Y7R8;F8W9I4;E9PFY5;H0Y8L4;H0Y9I0;H0Y8U8;H0Y948;H0YA98	P55196;P55196-5;A8MQ02;J3KN01;P55196-3;Q5TIG5;P55196-2;P55196-6;P55196-1	Afadin	MLLT4	102.5	1723000000	193	27.4183	27.5143	27.5846	27.1665	27.4022	27.0037
	1.83994	-0.878483	P55212;D6RHU3;D6RBM3;P55212-2	P55212;D6RHU3;D6RBM3;P55212-2	Caspase-6;Caspase-6 subunit p18;Caspase-6 subunit p11	CASP6	12.036	210390000	22	25.3342	24.7845	24.8932	23.898	24.3487	24.1297
	0.571462	0.100565	P55263;P55263-3	P55263;P55263-3	Adenosine kinase	ADK	247.95	1940600000	133	27.5738	27.5912	27.7014	27.7237	27.6056	27.8388
	0.514784	-0.288537	P55265-5;P55265;P55265-4;H0YCK3;P55265-2;A0A3B3IRQ9;P55265-3;A0A3B3ISX1;A0A3B3ITG9;A0A3B3ISU1	P55265-5;P55265;P55265-4;H0YCK3;P55265-2;A0A3B3IRQ9;P55265-3;A0A3B3ISX1	Double-stranded RNA-specific adenosine deaminase	ADAR	77.045	1329000000	143	26.8706	27.236	27.1615	27.1272	26.8909	26.3844
	0.81908	-0.922625	P55287-2;P55287;H3BUU9;H3BQH2;J3KTG8;J3QKW5;J3QLE6;F5H5X9;J3KRI5;X6R3Y6;Q9ULB5;P55286	P55287-2;P55287;H3BUU9	Cadherin-11	CDH11	85.38	462620000	60	26.5478	25.3107	25.6906	25.0625	25.4927	24.2261
	0.429673	0.208611	P55735;P55735-4;P55735-3;P55735-2;A8MXL6;E7ERC8	P55735;P55735-4;P55735-3;P55735-2;A8MXL6	Protein SEC13 homolog	SEC13	182.29	1547500000	91	27.291	26.9419	27.4583	27.4589	27.185	27.6732
	0.145629	-0.0540403	P55795	P55795	Heterogeneous nuclear ribonucleoprotein H2	HNRNPH2	70.316	980580000	59	26.4853	26.7186	26.5648	26.4938	26.7605	26.3522
	1.94603	0.839614	P55809;E9PDW2;P55809-2;Q9BYC2	P55809;E9PDW2	Succinyl-CoA:3-ketoacid coenzyme A transferase 1, mitochondrial	OXCT1	213.96	1854200000	132	26.8579	27.2989	26.8571	27.9375	27.6086	27.9867
	1.02383	-0.246839	P55884;P55884-2;C9JZG1;C9JQN7	P55884;P55884-2	Eukaryotic translation initiation factor 3 subunit B	EIF3B	138.32	3803700000	206	28.7736	28.6656	28.6526	28.3119	28.6598	28.3796
	0.507592	-0.22365	P56134-3;P56134;C9JJT5;C9JU26;G3V325;P56134-4;P56134-2	P56134-3;P56134;C9JJT5;C9JU26;G3V325;P56134-4;P56134-2	ATP synthase subunit f, mitochondrial	ATP5J2;ATP5J2-PTCD1	11.752	832820000	35	26.7003	26.0541	26.5095	26.2179	26.1546	26.2205
	0.206369	-0.047554	P56192;P56192-2;H0YIP0;H0YHV5;F5H2V6;H0YI94;F8VS26;F8W0M7;F8W0S4;F8VZZ9;F8VPL7;H0YHL6;H0YI27	P56192;P56192-2	Methionine--tRNA ligase, cytoplasmic	MARS	170.81	3042800000	264	28.3848	28.0869	28.179	28.1423	28.1848	28.1809
	0.441647	-0.867029	P56199	P56199	Integrin alpha-1	ITGA1	26.38	273140000	38	26.1094	24.7062	24.3809	24.0616	25.3951	23.1388
	0.135402	-0.0692787	P56385	P56385	ATP synthase subunit e, mitochondrial	ATP5I	15.359	1421700000	64	27.429	27.1483	26.8739	27.2495	27.0892	26.9046
	1.23282	-0.557224	P56537;P56537-2;B7ZBH1;A0A0U1RQV5;F8WD20;A0A0B4J1Y7;F8WDS6	P56537;P56537-2	Eukaryotic translation initiation factor 6	EIF6	62.617	767800000	52	26.6644	26.2115	26.4453	26.0511	26.0498	25.5487
	0.327566	-0.187492	Q5SQP8;P56545;P56545-3;P56545-2;A0A087WYL1	Q5SQP8;P56545;P56545-3;P56545-2	C-terminal-binding protein 2	CTBP2	28.754	742090000	42	25.9493	26.3644	26.2657	26.1588	26.2479	25.6103
	0.31623	-0.215639	P57740;P57740-2;P57740-3;G3V1T4;H0YG15	P57740;P57740-2;P57740-3	Nuclear pore complex protein Nup107	NUP107	74.181	389180000	56	25.0855	25.7345	25.0162	25.3644	25.0048	24.8201
	0.164659	0.122127	P58546;C9JL85	P58546	Myotrophin	MTPN	68.614	2068000000	46	27.8779	27.3099	27.5508	28.1456	27.5497	27.4097
	1.36264	0.772097	P59768;G3V3J9;G3V2N0;G3V2C9;G3V415	P59768;G3V3J9;G3V2N0	Guanine nucleotide-binding protein G(I)/G(S)/G(O) subunit gamma-2;Guanine nucleotide-binding protein subunit gamma	GNG2	78.67	2217500000	76	26.9231	27.6301	27.3786	28.0542	27.812	28.3818
	0.612038	1.46216	P60059	P60059	Protein transport protein Sec61 subunit gamma	SEC61G	14.883	718470000	31	22.7767	26.1821	25.5715	25.9101	26.3186	26.6881
	2.32606	0.270583	P60174-1;P60174;P60174-4;U3KPZ0;U3KQF3;U3KPS5	P60174-1;P60174;P60174-4;U3KPZ0	Triosephosphate isomerase	TPI1	156.81	79323000000	348	32.6332	32.7037	32.7477	33.0313	32.9468	32.9183
	0.598961	-0.317755	P60228;E5RGA2;H0YBR5;E5RHS5;H0YAW4;E5RII3;E5RIT4;E5RIP5;E5RJ25;H0YBP5	P60228;E5RGA2	Eukaryotic translation initiation factor 3 subunit E	EIF3E	164.48	2717400000	145	28.6702	28.1954	27.9712	28.098	27.7264	28.0591
	0.174655	0.15403	P60468;S4R3B5	P60468	Protein transport protein Sec61 subunit beta	SEC61B	40.271	1386700000	42	27.2777	26.6728	27.2084	27.3191	26.6861	27.6159
	1.18185	0.607909	P60520;H3BSM5;H3BQ50;H3BU36	P60520;H3BSM5	Gamma-aminobutyric acid receptor-associated protein-like 2	GABARAPL2	22.562	948270000	52	25.8111	26.5999	26.4215	26.9553	26.8764	26.8244
	1.14745	0.182453	P60842;J3KT12;P60842-2;J3QS69;J3KTB5;J3QL43;J3QR64;J3QLN6;J3KSZ0;J3QKZ9;J3KS25;J3KTN0;J3KS93;J3QL52;J3KT04;J3QQP0	P60842;J3KT12;P60842-2;J3QS69;J3KTB5;J3QL43;J3QR64	Eukaryotic initiation factor 4A-I	EIF4A1	323.31	15702000000	345	30.6013	30.4244	30.4957	30.7963	30.654	30.6185
	0.208257	0.172951	P60866;P60866-2;E5RJX2;E5RIP1;G3XAN0	P60866;P60866-2;E5RJX2	40S ribosomal protein S20	RPS20	30.775	4543600000	74	28.5686	28.6154	28.906	29.2128	28.2642	29.1319
	0.586776	0.180396	P60900;G3V5Z7;G3V295;P60900-2;G3V3I1;G3V3U4;P60900-3;G3V4S5;G3V2S7;H0YJC4	P60900;G3V5Z7;G3V295;P60900-2;G3V3I1	Proteasome subunit alpha type-6;Proteasome subunit alpha type	PSMA6	91.965	8373300000	175	29.3216	29.5877	29.6722	29.8662	29.5639	29.6925
	0.144638	0.0801582	P60903	P60903	Protein S100-A10	S100A10	12.073	880220000	39	26.1359	26.436	26.4653	26.2093	26.7763	26.292
	0.061832	-0.028546	P60953;Q5JYX0;A0A3B3IRV0;F8WET9;B1AH79;G3V4H1;G3V476;Q9H4E5-2;P17081;Q9H4E5	P60953;Q5JYX0	Cell division control protein 42 homolog	CDC42	93.533	3265000000	112	28.5278	28.206	28.2158	28.1716	28.1634	28.529
	1.19153	0.333959	P60981;F6RFD5;P60981-2	P60981;F6RFD5;P60981-2	Destrin	DSTN	90.946	5594400000	133	29.0458	28.9003	28.7209	29.4039	29.1002	29.1648
	1.51147	0.358565	P60983;G3V4P8;G3V3X4;M0QYG8;M0R1D2;M0R0C1;M0QYJ8;O60234	P60983;G3V4P8	Glia maturation factor beta	GMFB	40.138	1514600000	42	27.0449	26.8517	27.1208	27.3733	27.2304	27.4895
	0.715333	0.110214	P61006;P61006-2	P61006;P61006-2	Ras-related protein Rab-8A	RAB8A	29.849	1039200000	70	26.6129	26.6191	26.5714	26.5818	26.736	26.8163
	0.587888	-0.195946	P61009	P61009	Signal peptidase complex subunit 3	SPCS3	12.764	738530000	39	26.4063	26.4112	26.2862	25.9565	26.4428	26.1165
	1.21155	0.204352	P61011;P61011-2;G3V4F7;G3V480;G3V346;A0A0D9SFN7;G3V3L9	P61011;P61011-2;G3V4F7	Signal recognition particle 54 kDa protein	SRP54	90.196	1189900000	111	26.6611	26.9003	26.7494	26.9158	27.0443	26.9639
	0.492162	0.202606	P61019;P61019-2;E9PKL7;H7C125;H0YD31;E9PE37;A0A1D5RMT4;H0YDL5	P61019;P61019-2;E9PKL7	Ras-related protein Rab-2A	RAB2A	71.446	6085000000	161	29.1046	28.876	29.0591	29.4645	29.28	28.9029
	0.107359	-0.0507832	P61020;P61020-2;F8VUA5	P61020;P61020-2;F8VUA5	Ras-related protein Rab-5B	RAB5B	45.617	1025100000	63	26.7157	26.7178	26.538	26.2944	26.8243	26.7004
	0.879559	0.393457	P61026	P61026	Ras-related protein Rab-10	RAB10	102.73	4568900000	108	28.5835	28.4341	28.7002	29.119	28.5816	29.1977
	0.747104	0.268764	P61081;M0QX69;M0QYI6	P61081	NEDD8-conjugating enzyme Ubc12	UBE2M	24.752	1129900000	48	26.7054	26.6712	26.7294	27.1282	26.6422	27.1418
	0.0435059	0.013677	P61086;P61086-2;P61086-3;D6RDM7;D6RFX1	P61086;P61086-2;P61086-3	Ubiquitin-conjugating enzyme E2 K	UBE2K	91.226	1641200000	100	27.4889	27.2167	27.2341	27.2808	27.4484	27.2515
	0.566547	0.207663	P61088;F8VSD4;F8VV71;F8VQQ8;Q5JXB2;F8VZ29	P61088;F8VSD4;F8VV71;F8VQQ8;Q5JXB2	Ubiquitin-conjugating enzyme E2 N;Putative ubiquitin-conjugating enzyme E2 N-like	UBE2N;UBE2NL	104.92	7983200000	147	29.1218	29.5417	29.5698	29.7611	29.5101	29.5851
	1.62841	0.419034	P61106;X6RFL8	P61106;X6RFL8	Ras-related protein Rab-14	RAB14	100.11	4222800000	166	28.3177	28.3487	28.4928	29.0017	28.7697	28.6449
	0.504699	-0.202275	P61158;B4DXW1;F8WDR7;Q9P1U1-2;Q9P1U1;Q9P1U1-3;A0A0A0MTI9;H7C4J1;C9IZN3;Q9C0K3;F8WEW2;F8WE84	P61158;B4DXW1	Actin-related protein 3	ACTR3	143.82	4979400000	233	29.2654	28.9173	29.0245	28.6369	29.1259	28.8375
	0.337758	0.102558	P61160;P61160-2;F5H6T1;A0A1B0GWD0;A0A1B0GWH0	P61160;P61160-2;F5H6T1	Actin-related protein 2	ACTR2	122.15	4172800000	181	28.7689	28.4858	28.7176	28.9404	28.6639	28.6756
	1.37395	0.39034	P61163;R4GMT0;A0A1B0GVS3	P61163;R4GMT0;A0A1B0GVS3	Alpha-centractin	ACTR1A	221.84	8409100000	257	29.2617	29.5864	29.3683	29.7777	29.6463	29.9635
	0.195082	-0.0624072	P61201;P61201-2;B4DIH5;H0YKU5;H0YM03;H0YMC2	P61201;P61201-2;B4DIH5;H0YKU5	COP9 signalosome complex subunit 2	COPS2	82.336	1760300000	136	27.5496	27.4423	27.4023	27.3881	27.6077	27.2111
	0.349273	-0.17116	P61221;D6R9I9;D6RGF4;H0Y990	P61221;D6R9I9	ATP-binding cassette sub-family E member 1	ABCE1	225.62	1843400000	163	27.7311	27.539	27.4888	27.7937	27.2088	27.243
	0.0606057	0.0185687	P61224;E7ESV4;F5H7Y6;P61224-3;F5GX62;P61224-4;A6NIZ1;F5H823;B7ZB78;F5GZG1;F5H6R7;F5H004;P61224-2;F5GYB5;F5H077;F5GWU8;F5H491;F5H0B7;F5H500;F5H4H0;F5GYH7;F8WBC0	P61224;E7ESV4;F5H7Y6;P61224-3;F5GX62;P61224-4;A6NIZ1;F5H823;B7ZB78;F5GZG1;F5H6R7;F5H004;P61224-2	Ras-related protein Rap-1b;Ras-related protein Rap-1b-like protein	RAP1B	160.11	6575000000	128	29.2964	29.1957	29.2835	29.1103	29.4605	29.2605
	0.534683	-0.752661	P61225	P61225	Ras-related protein Rap-2b	RAP2B	8.1005	88387000	20	23.7375	23.7638	22.5409	23.3395	22.7241	21.7208
	0.388825	0.203636	P61247;D6RAT0;H0Y9Y4;H0Y8L7;E9PFI5;D6RG13;D6RB09;D6R9B6;D6RAS7;D6RI02;D6RED7;D6RGE0	P61247;D6RAT0;H0Y9Y4;H0Y8L7;E9PFI5;D6RG13;D6RB09;D6R9B6	40S ribosomal protein S3a	RPS3A	75.77	11944000000	204	29.8625	30.1484	30.2709	30.4781	29.9283	30.4864
	0.457109	-0.267228	P61289;P61289-3;P61289-2;A0A087WTV2;B3KQ25;K7ESG5;K9J957;K7ENH2;K7EMD0;K7EPX6;K7EKR3;B7Z8D3	P61289;P61289-3;P61289-2;A0A087WTV2;B3KQ25;K7ESG5;K9J957;K7ENH2	Proteasome activator complex subunit 3	PSME3	16.297	414180000	40	25.6971	25.4184	25.3397	25.5106	25.3736	24.7694
	0.247742	0.159955	P61313;A0A2R8YEM3;E7EQV9;E7ENU7;E7EX53;A0A2R8Y738;P61313-2;E7ERA2	P61313;A0A2R8YEM3;E7EQV9;E7ENU7	60S ribosomal protein L15;Ribosomal protein L15	RPL15	42.771	4628900000	142	28.7578	28.6976	28.6996	29.1628	28.37	29.1021
	0.468666	-0.282046	P61353;K7ELC7;K7EQQ9;K7ERY7	P61353;K7ELC7	60S ribosomal protein L27	RPL27	13.139	4108500000	57	28.9784	28.5156	28.9446	28.9385	28.2155	28.4385
	0.200031	-0.120142	P61513;C9J4Z3;Q6P4E4;E9PEL3;G5E9R3;M0R0A1;M0R2L6;A6NKH3	P61513;C9J4Z3;Q6P4E4;E9PEL3;G5E9R3;M0R0A1;M0R2L6	60S ribosomal protein L37a	RPL37A	26.905	818560000	31	26.3447	26.2396	26.3379	26.6349	26.0458	25.8811
	0.0311855	0.0140324	P61586;C9JNR4;C9JX21;C9JRM1	P61586;C9JNR4;C9JX21	Transforming protein RhoA	RHOA	72.21	4879000000	98	28.7324	28.8756	29.0153	29.137	28.7131	28.8153
	0.702461	0.448953	P61601;E5RGA9;E5RIZ1;E5RI95;A0A1B0GXG3;E5RHE8;E5RI78;E5RHC8;E5RIG4;E5RIA5;E5RK89;E5RFL9;E5RJT1;E5RJJ6;E5RGZ0;E5RIX3	P61601;E5RGA9;E5RIZ1;E5RI95;A0A1B0GXG3;E5RHE8;E5RI78;E5RHC8;E5RIG4;E5RIA5	Neurocalcin-delta	NCALD	62.424	1800100000	67	26.7312	27.5972	27.1183	27.3744	27.5383	27.8808
	0.865296	0.562155	P61604;B8ZZL8;B8ZZ54	P61604;B8ZZL8	10 kDa heat shock protein, mitochondrial	HSPE1	24.835	27933000000	132	30.362	31.2173	30.9184	31.1908	31.2635	31.7299
	0.932905	0.286565	P61758;B4DWR3	P61758;B4DWR3	Prefoldin subunit 3	VBP1	32.204	2980400000	81	27.9362	28.2466	28.0236	28.4794	28.4506	28.1361
	0.297423	-0.196291	P61769;H0YLF3;F5H6I0	P61769;H0YLF3;F5H6I0	Beta-2-microglobulin;Beta-2-microglobulin form pI 5.3	B2M	24.188	490200000	51	25.8788	25.549	25.668	25.2032	25.3053	25.9984
	0.0676942	0.119519	P61956-2;P61956;Q6EEV6	P61956-2;P61956	Small ubiquitin-related modifier 2	SUMO2	76.472	5972600000	41	29.4882	29.4211	28.1727	28.4159	29.0768	29.9478
	0.336513	-0.135796	P61960;H0Y614;P61960-2	P61960;H0Y614;P61960-2	Ubiquitin-fold modifier 1	UFM1	83.849	2562200000	85	28.2357	27.9176	28.292	27.7796	28.1712	28.0872
	0.358456	0.739234	P61962;A0A087WWI6;P61962-2	P61962;A0A087WWI6	DDB1- and CUL4-associated factor 7	DCAF7	16.104	754990000	62	23.9022	26.2315	26.603	26.1939	26.6248	26.1358
	0.640776	-0.229881	P61964;V9GZ59;Q86VZ2;V9GYQ5	P61964	WD repeat-containing protein 5	WDR5	20.843	409010000	57	25.3667	25.8087	25.2922	25.2778	25.2716	25.2286
	0.211853	0.0686652	P61970;H3BRV9	P61970;H3BRV9	Nuclear transport factor 2	NUTF2	36.542	6399100000	74	29.193	29.2258	29.444	29.257	29.5522	29.2596
	0.211792	-0.0905374	P61978-2;P61978;S4R457;S4R359	P61978-2;P61978	Heterogeneous nuclear ribonucleoprotein K	HNRNPK	23.958	961000000	44	26.3633	26.6968	26.7631	26.5329	26.7002	26.3186
	0.0261066	0.0142492	P61978-3;Q5T6W2	P61978-3;Q5T6W2	Heterogeneous nuclear ribonucleoprotein K	HNRNPK	323.31	35533000000	458	31.6553	31.8863	31.9112	32.0185	31.5054	31.9718
	1.32982	0.589896	P61981	P61981	14-3-3 protein gamma;14-3-3 protein gamma, N-terminally processed	YWHAG	323.31	29940000000	213	31.093	31.33	30.9662	31.7203	31.4108	32.0278
	0.77728	-0.446997	P62070;P62070-4;E9PK85;P62070-3;P62070-2;E9PQK5;E9PQC5;E9PQ87	P62070;P62070-4;E9PK85;P62070-3;P62070-2	Ras-related protein R-Ras2	RRAS2	18.278	134750000	32	24.482	23.9232	23.8253	23.8127	23.2931	23.7838
	0.0993722	-0.0304985	P62081;A0A2R8Y623;B5MCP9	P62081;A0A2R8Y623;B5MCP9	40S ribosomal protein S7	RPS7	186.06	11825000000	165	30.2263	30.1828	30.2143	30.2956	29.9589	30.2774
	0.251831	0.139653	P62136;P62136-2;E9PMD7;P62136-3;F5H1L6;F5H037;F8WE71;H0Y3Y6;F8W1A0;F8W0V8	P62136;P62136-2;E9PMD7;P62136-3	Serine/threonine-protein phosphatase PP1-alpha catalytic subunit;Serine/threonine-protein phosphatase	PPP1CA	16.356	832950000	43	26.181	26.2898	26.4861	26.6837	26.0576	26.6346
	0.486569	-0.149342	P62140;E7ETD8;C9J9S3;C9JP48	P62140;E7ETD8;C9J9S3;C9JP48	Serine/threonine-protein phosphatase PP1-beta catalytic subunit;Serine/threonine-protein phosphatase	PPP1CB	74.222	5129400000	150	29.0148	29.1924	28.9449	28.9909	29.0333	28.6799
	0.737134	-0.145656	P62191;P62191-2;G3V4X1	P62191;P62191-2	26S protease regulatory subunit 4	PSMC1	119.07	4342800000	190	28.8271	28.7646	28.8704	28.526	28.8212	28.678
	0.819411	0.112183	P62195;P62195-2;J3QQM1;J3KRP2;J3QSA9;J3QLH6;J3QSE0;J3QRW1;J3QRR3;J3KTQ9	P62195;P62195-2;J3QQM1;J3KRP2;J3QSA9;J3QLH6	26S protease regulatory subunit 8	PSMC5	238.19	5562200000	247	28.8713	28.9438	28.8564	29.1171	28.9375	28.9535
	0.522241	-0.157858	P62241;Q5JR95	P62241;Q5JR95	40S ribosomal protein S8	RPS8	101.25	8942800000	190	29.7941	29.7494	29.8985	29.8973	29.5942	29.4768
	0.568973	-0.343049	P62244;I3L3P7;I3L246;H3BV27;H3BT37;I3L303;H3BVC7	P62244;I3L3P7;I3L246	40S ribosomal protein S15a	RPS15A	33.608	6019800000	108	29.4059	29.1909	29.3818	29.4448	28.9567	28.5479
	0.338301	0.200263	P62249;M0R210;M0R3H0;M0R1M5;M0QX76;Q6IPX4	P62249;M0R210;M0R3H0;M0R1M5;M0QX76;Q6IPX4	40S ribosomal protein S16	RPS16	17.784	7631400000	82	29.3677	29.4128	29.5411	29.8271	29.1664	29.9289
	1.33337	0.531031	P62258;P62258-2;B4DJF2;I3L3T1;K7EIT4;K7EM20;I3L0W5	P62258;P62258-2	14-3-3 protein epsilon	YWHAE	323.31	130940000000	546	33.0614	33.398	33.3689	33.9523	33.5031	33.9661
	0.124142	-0.0797742	P62266;D6RD47;D6RDJ2;D6RIX0;D6R9I7	P62266;D6RD47	40S ribosomal protein S23	RPS23	31.485	3717600000	78	28.573	28.7137	28.3396	28.2066	28.3056	28.8748
	0.203761	-0.102754	P62269;J3JS69;A0A0G2JQH2;Q5GGW2	P62269	40S ribosomal protein S18	RPS18	103.52	7121500000	107	29.5816	29.4493	29.5232	29.5938	29.0338	29.6182
	0.308606	-0.182626	P62277;J3KMX5;E9PS50	P62277;J3KMX5	40S ribosomal protein S13	RPS13	33.252	5989300000	101	29.1183	29.2115	29.3793	29.4455	29.0633	28.6526
	0.209045	0.120248	P62280;M0QZC5;M0R1H5;M0R1H6	P62280;M0QZC5	40S ribosomal protein S11	RPS11	48.731	6276600000	115	29.1768	29.1576	29.2789	29.4051	28.9106	29.6582
	0.544527	-0.383287	P62304;A6NHK2	P62304;A6NHK2	Small nuclear ribonucleoprotein E	SNRPE	20.918	1426100000	26	27.0238	27.5723	27.4115	26.4958	27.4142	26.9477
	0.28754	-0.373111	P62306;A0A0B4J254;F8W0W6	P62306;A0A0B4J254;F8W0W6	Small nuclear ribonucleoprotein F	SNRPF	90.064	1503300000	53	27.2398	27.3782	27.0758	27.8552	26.5948	26.1245
	0.218606	0.121	P62310	P62310	U6 snRNA-associated Sm-like protein LSm3	LSM3	47.378	512930000	50	25.4856	25.4309	25.8156	25.4085	25.6615	26.0251
	0.15835	0.160573	P62312	P62312	U6 snRNA-associated Sm-like protein LSm6	LSM6	11.692	742720000	28	25.2384	26.3478	26.3021	26.3316	25.9356	26.1029
	0.421718	0.160842	P62314;J3QLI9;J3QLR7	P62314;J3QLI9	Small nuclear ribonucleoprotein Sm D1	SNRPD1	49.936	4988200000	58	28.8918	28.9896	28.5549	29.1583	28.8406	28.9199
	0.0851591	-0.0610453	P62316;P62316-2;K7ERG4;K7EJB5	P62316;P62316-2;K7ERG4	Small nuclear ribonucleoprotein Sm D2	SNRPD2	44.468	3996000000	107	28.3263	28.985	29.0344	28.5181	28.7412	28.9031
	0.0460473	0.0313396	P62318-2;P62318;H3BT13	P62318-2;P62318;H3BT13	Small nuclear ribonucleoprotein Sm D3	SNRPD3	45.378	3613200000	79	28.0132	28.6392	28.7024	28.5923	28.52	28.3365
	1.175	1.28214	P62328	P62328	Thymosin beta-4;Hematopoietic system regulatory peptide	TMSB4X	13.954	48873000000	75	30.2407	31.9327	30.8887	32.5257	32.3451	32.0377
	0.249926	-0.125491	P62330	P62330	ADP-ribosylation factor 6	ARF6	21.149	285020000	39	24.5998	25.0373	24.6617	24.4414	24.559	24.9218
	0.10806	0.0810483	P62424;Q5T8U3;Q5T8U2	P62424;Q5T8U3;Q5T8U2	60S ribosomal protein L7a	RPL7A	105.51	8704800000	117	29.6473	29.6077	29.7691	30.0161	29.2227	30.0284
	1.01261	-0.227734	P62495;B7Z7P8;P62495-2;I3L492;D6RJE8;D6RCB3	P62495;B7Z7P8;P62495-2	Eukaryotic peptide chain release factor subunit 1	ETF1	128.62	1979900000	142	27.704	27.801	27.5765	27.599	27.4863	27.313
	0.394011	0.19652	P62701	P62701	40S ribosomal protein S4, X isoform	RPS4X	98.871	12888000000	233	30.1348	30.1586	30.43	30.6277	30.0614	30.6239
	0.497776	-0.271296	P62753;A2A3R5;A2A3R7	P62753;A2A3R5;A2A3R7	40S ribosomal protein S6	RPS6	74.848	5219000000	95	28.8914	29.0871	29.1896	29.2255	28.5296	28.5993
	1.98603	1.03306	P62760;E7ER47	P62760	Visinin-like protein 1	VSNL1	13.218	193890000	25	23.9951	23.9795	23.4047	24.6258	24.8235	25.0291
	0.092177	0.0704962	P62805	P62805	Histone H4	HIST1H4A	32.387	12451000000	132	29.6372	30.097	30.175	30.4565	29.9251	29.739
	0.127055	0.0465965	P62820;E7END7;P62820-3;P62820-2;A0A2R8YDI9;H0YLJ8;H0YL94;G3V196;A0A2R8YFB8;P59190-2;P59190	P62820;E7END7;P62820-3;P62820-2	Ras-related protein Rab-1A	RAB1A	96.889	1594300000	54	27.2201	27.2754	27.1331	27.004	27.3449	27.4195
	0.558272	0.296865	P62826;B5MDF5;J3KQE5;F5H018;H0YFC6;B4DV51;A0A087X0W0	P62826;B5MDF5;J3KQE5;F5H018	GTP-binding nuclear protein Ran	RAN	85.859	30269000000	265	30.9552	31.4908	31.4997	31.9162	31.4443	31.4759
	0.914827	-0.386654	P62829;J3KT29;C9JD32;B9ZVP7;J3KTJ3;J3QQT9	P62829;J3KT29;C9JD32;B9ZVP7	60S ribosomal protein L23	RPL23	36.417	3356500000	82	28.5944	28.6587	28.4265	28.2837	28.4235	27.8125
	0.173715	-0.0915922	P62851	P62851	40S ribosomal protein S25	RPS25	7.9092	4598500000	43	28.5372	28.8973	28.7504	28.9296	28.6403	28.3402
	1.28073	-0.180872	P62854;Q5JNZ5	P62854;Q5JNZ5	40S ribosomal protein S26;Putative 40S ribosomal protein S26-like 1	RPS26;RPS26P11	15.032	1753500000	53	27.54	27.5579	27.4914	27.228	27.4413	27.3773
	0.454225	-0.291697	P62857	P62857	40S ribosomal protein S28	RPS28	10.43	2418800000	29	27.6054	27.7931	27.992	27.0841	27.9595	27.4718
	1.08875	0.584422	P62873;P62873-2;B3KVK2;F6UT28;F6X3N5;B1AKQ8	P62873;P62873-2;B3KVK2	Guanine nucleotide-binding protein G(I)/G(S)/G(T) subunit beta-1	GNB1	323.31	15884000000	257	29.976	30.4785	30.3782	31.0391	30.4623	31.0846
	1.28978	0.703373	P62877	P62877	E3 ubiquitin-protein ligase RBX1;E3 ubiquitin-protein ligase RBX1, N-terminally processed	RBX1	61.549	487010000	23	24.9032	25.0273	25.4559	26.1348	25.4727	25.889
	0.940785	0.237864	P62879;E7EP32;P62879-2;C9JXA5;C9JIS1;C9JZN1;F5H8J8;F5H100;F5H0S8;E9PCP0;P16520-2;P16520	P62879;E7EP32;P62879-2;C9JXA5;C9JIS1	Guanine nucleotide-binding protein G(I)/G(S)/G(T) subunit beta-2	GNB2	105.51	1786300000	100	27.2275	27.0875	27.3293	27.4828	27.2746	27.6004
	0.11672	0.0861708	P62899;C9JU56;B7Z4E3;B7Z4C8;P62899-3;P62899-2;B8ZZK4;H7C2W9	P62899;C9JU56;B7Z4E3;B7Z4C8;P62899-3;P62899-2;B8ZZK4;H7C2W9	60S ribosomal protein L31	RPL31	25.226	3011400000	87	27.9863	28.1483	28.4291	28.459	27.8069	28.5564
	0.410026	-0.355715	P62906	P62906	60S ribosomal protein L10a	RPL10A	145.98	5469000000	94	29.1796	28.9691	29.275	29.3919	28.8094	28.1552
	0.267372	-0.153018	P62913-2;P62913;Q5VVC8	P62913-2;P62913;Q5VVC8	60S ribosomal protein L11	RPL11	46.023	4471100000	84	28.6453	28.7272	28.9498	29.0274	28.51	28.3259
	0.484953	0.295523	P62917;E9PKU4;E9PKZ0;G3V1A1;E9PP36	P62917;E9PKU4;E9PKZ0;G3V1A1	60S ribosomal protein L8	RPL8	137.54	6557700000	159	28.9869	29.249	29.3259	29.6508	29.0012	29.7963
	0.343376	0.0805753	P62937;F8WE65;C9J5S7;P62937-2;P0DN26;A0A0H2UH34;A0A0B4J2A2;A0A075B767;A0A075B759;Q9Y536;F5H284;E5RIZ5;P0DN37	P62937;F8WE65;C9J5S7	Peptidyl-prolyl cis-trans isomerase A;Peptidyl-prolyl cis-trans isomerase A, N-terminally processed;Peptidyl-prolyl cis-trans isomerase	PPIA	214.8	73237000000	279	32.6664	32.8817	32.5793	32.7352	32.8602	32.7738
	0.923673	0.396175	P62942;Q5W0X3;Q1JUQ5;A0A087WZM5;Q1JUQ3;A0A087WTS4;Q5VVH2;A0A087WV48	P62942;Q5W0X3;Q1JUQ5	Peptidyl-prolyl cis-trans isomerase FKBP1A;Peptidyl-prolyl cis-trans isomerase	FKBP1A;FKBP12-Exip2	92.582	4843300000	108	28.3535	28.7294	28.6748	29.0909	28.6624	29.1929
	0.933687	0.458078	P62979;A0A2R8Y422	P62979;A0A2R8Y422	Ubiquitin-40S ribosomal protein S27a;Ubiquitin;40S ribosomal protein S27a	RPS27A	145.59	64311000000	113	32.4885	32.3045	32.2798	32.7365	32.481	33.2296
	1.33663	0.588538	P62993;P62993-2;J3KT38;J3QRL5;J3QLF6	P62993;P62993-2	Growth factor receptor-bound protein 2	GRB2	71.652	2412900000	131	27.2575	27.5119	27.7208	28.228	27.7727	28.255
	0.138966	0.0974801	P62995-3;P62995;H7BXF3;H7C2L4	P62995-3;P62995;H7BXF3	Transformer-2 protein homolog beta	TRA2B	16.284	1450200000	53	26.6734	27.434	27.4556	27.3526	27.2462	27.2567
	1.06974	0.401656	P63000;P63000-2;P15153;B1AH77;B1AH78;B1AH80	P63000;P63000-2;P15153	Ras-related C3 botulinum toxin substrate 1;Ras-related C3 botulinum toxin substrate 2	RAC1;RAC2	16.212	4137800000	67	28.3886	28.4578	28.4961	28.8399	28.5532	29.1545
	1.29481	0.168099	P63010;P63010-2;A0A087X253;P63010-3;A0A087WU93;A0A087WZQ6;A0A087WYD1;K7EN71;K7ERB2;K7EJX1;K7EJ01;A0A087WXS3;K7EKZ5	P63010;P63010-2;A0A087X253;P63010-3;A0A087WU93;A0A087WZQ6;A0A087WYD1	AP-2 complex subunit beta	AP2B1	217.54	8920000000	357	29.7523	29.5974	29.5567	29.7852	29.8269	29.7986
	1.17728	0.334252	P63096;P63096-2;A0A3B3ITM0;A0A3B3IUA8	P63096;P63096-2;A0A3B3ITM0	Guanine nucleotide-binding protein G(i) subunit alpha-1	GNAI1	50.231	686510000	50	25.9347	25.9269	25.9683	26.0195	26.3515	26.4617
	1.42484	0.51439	P63104;E7EX29;B0AZS6;P63104-2;B7Z2E6;H0YB80;E7ESK7;E5RIR4;E9PD24;E7EVZ2;E5RGE1	P63104;E7EX29;B0AZS6;P63104-2;B7Z2E6;H0YB80	14-3-3 protein zeta/delta	YWHAZ	323.31	80903000000	376	32.5199	32.7304	32.6321	33.2331	32.8367	33.3557
	0.283525	-0.176229	P63151;P63151-2;E5RIY1;A0A1W2PQI2;E5RFR9;Q00005-6;Q00005;Q00005-2;Q00005-3;Q00005-4;Q00005-5;Q00005-7;H0YB06;Q9Y2T4-3;Q9Y2T4-4;Q9Y2T4-2;Q9Y2T4;E5RHQ2;E5RJV2;H0YA16	P63151;P63151-2	Serine/threonine-protein phosphatase 2A 55 kDa regulatory subunit B alpha isoform	PPP2R2A	173.22	2270300000	141	28.3786	27.6163	27.8191	27.6072	27.9594	27.7187
	0.935198	0.349733	P63167;F8VXL2;F8VRV5;F8VXI7	P63167	Dynein light chain 1, cytoplasmic	DYNLL1	92.757	4078900000	62	28.4581	28.4823	28.5131	28.817	28.5417	29.1441
	1.1163	0.474985	P63172	P63172	Dynein light chain Tctex-type 1	DYNLT1	245.89	2335000000	68	27.3748	27.7253	27.9518	28.1584	27.9705	28.348
	0.623934	-0.215527	P63173;J3KT73;J3QL01;J3KSP2	P63173;J3KT73;J3QL01;J3KSP2	60S ribosomal protein L38	RPL38	5.9879	2122300000	28	27.8048	27.5564	27.8768	27.7547	27.4988	27.3379
	1.72798	0.418723	P63208;E5RJR5;E7ERH2;F8W8N3;P63208-2;E5RGM3;E5RHM3;E5RGM4	P63208;E5RJR5;E7ERH2;F8W8N3;P63208-2;E5RGM3	S-phase kinase-associated protein 1	SKP1	211.08	5496000000	129	28.7723	28.9494	29.0292	29.2873	29.2298	29.49
	0.730959	0.314304	Q8WVC2;P63220;Q9BYK1;Q9BYK2	Q8WVC2;P63220;Q9BYK1	40S ribosomal protein S21	RPS21	74.005	3563700000	64	28.174	28.4293	28.4061	28.7736	28.2975	28.8811
	0.182219	0.0854581	P63241;P63241-2;I3L397;I3L504;Q6IS14;F8WCJ1;C9J7B5;C9J4W5;Q9GZV4	P63241;P63241-2;I3L397;I3L504;Q6IS14	Eukaryotic translation initiation factor 5A-1;Eukaryotic translation initiation factor 5A;Eukaryotic translation initiation factor 5A-1-like	EIF5A;EIF5AL1	155.9	5822800000	104	29.2103	29.0619	29.0293	28.8677	29.4472	29.243
	0.053527	0.0249055	P63244;J3KPE3;D6RHH4;D6RAC2;H0YAF8;H0Y8W2;D6REE5;D6R9Z1;H0YAM7;D6R9L0;D6RFX4;D6RAU2;E9PD14;D6RFZ9;D6RBD0;D6RF23;H0Y8R5;D6RGK8;D6R909;D6RHJ5;D6RDI0;H0Y9P0	P63244;J3KPE3;D6RHH4;D6RAC2;H0YAF8;H0Y8W2;D6REE5;D6R9Z1;H0YAM7;D6R9L0;D6RFX4;D6RAU2;E9PD14;D6RFZ9	Guanine nucleotide-binding protein subunit beta-2-like 1;Guanine nucleotide-binding protein subunit beta-2-like 1, N-terminally processed	GNB2L1	210.43	12934000000	262	30.1311	30.3564	30.3168	30.575	30.0975	30.2065
	0.595891	-0.363457	P63279;H3BQQ9;B0QYN7;H3BPC4;H3BRD1	P63279;H3BQQ9;B0QYN7;H3BPC4	SUMO-conjugating enzyme UBC9	UBE2I	87.225	3602300000	92	28.4708	28.6109	28.7444	27.8888	28.7539	28.0929
	0.477021	0.304227	P67809;H0Y449;C9J5V9	P67809;H0Y449;C9J5V9	Nuclease-sensitive element-binding protein 1	YBX1	320.65	2971100000	124	27.8451	27.9663	28.0916	28.4155	27.7538	28.6464
	0.259302	0.102138	Q5SRQ6;P67870;Q5SRQ3;N0E472;A0A0G2JM12;N0E644;A0A0G2JM58	Q5SRQ6;P67870;Q5SRQ3	Casein kinase II subunit beta	CSNK2B;CSNK2B-LY6G5B-1181	18.131	1478900000	48	26.8841	27.2425	27.2842	27.4229	27.1559	27.1384
	0.11866	-0.0861524	P67936;A0A2R8YE05;K7ENT6;P67936-2;K7EPB9	P67936;A0A2R8YE05;K7ENT6;P67936-2	Tropomyosin alpha-4 chain	TPM4	105.46	12706000000	158	30.6583	30.1325	30.3265	30.4185	29.8652	30.5751
	0.23211	0.0567411	P68036;P68036-3;P68036-2;A0A1B0GUS4	P68036;P68036-3;P68036-2	Ubiquitin-conjugating enzyme E2 L3	UBE2L3	168.94	3887900000	100	28.5247	28.5731	28.7662	28.5677	28.6869	28.7797
	0.0355905	0.0163778	P68104;Q5VTE0;A0A087WVQ9;P68104-2;A0A087WV01;Q5JR01;A6PW80	P68104;Q5VTE0;A0A087WVQ9;P68104-2;A0A087WV01	Elongation factor 1-alpha 1;Putative elongation factor 1-alpha-like 3;Elongation factor 1-alpha	EEF1A1;EEF1A1P5	323.31	156060000000	616	33.9479	33.758	33.9317	34.1193	33.9392	33.6283
	1.20273	-0.954431	P68363;P68363-2;P68366-2;P68366;F8VVB9;F8VS66;F8VRZ4;C9JDS9;F8VX09;F8VWV9;F8VRK0;C9JDL2;F8W0F6;F8VXZ7;Q9H853	P68363;P68363-2;P68366-2;P68366	Tubulin alpha-1B chain;Tubulin alpha-4A chain	TUBA1B;TUBA4A	71.659	7591900000	58	30.2005	29.4873	30.2293	28.6131	29.5635	28.8773
	1.29947	0.238176	P68371;M0R2D3;M0R2T4;A0A075B724	P68371	Tubulin beta-4B chain	TUBB4B	323.31	436170000000	1447	35.0871	35.3288	35.3024	35.4464	35.4313	35.555
	0.309581	0.102642	P68402;P68402-2;P68402-4;P68402-3;J3KNE3	P68402;P68402-2;P68402-4;P68402-3	Platelet-activating factor acetylhydrolase IB subunit beta	PAFAH1B2	124.48	4441200000	109	28.7456	28.7105	28.6538	28.968	28.9068	28.5431
	1.59861	0.846965	P78310;P78310-7;P78310-2;P78310-6;P78310-5;P78310-4;P78310-3	P78310;P78310-7;P78310-2;P78310-6;P78310-5	Coxsackievirus and adenovirus receptor	CXADR	122.86	2096800000	98	26.8668	27.1957	27.2057	28.0036	27.5334	28.2722
	0.769832	0.727575	P78318;A0A1W2PR95	P78318	Immunoglobulin-binding protein 1	IGBP1	17.024	246930000	25	23.802	24.9549	23.7781	24.7618	24.6613	25.2945
	0.00336295	-0.00134277	P78344;D3DQV9;P78344-2;H0Y3P2;H0YCH5;H0YD77;E9PKF8;H0YEC5;H0YE22;H0YCF8;H0YE44;H0YEN8;H0YDC0;H0YEW3;H0YEI7;H0YD99	P78344;D3DQV9;P78344-2;H0Y3P2	Eukaryotic translation initiation factor 4 gamma 2	EIF4G2	162.15	3076600000	227	28.1894	28.162	28.1806	28.3626	28.2403	27.9251
	0.682984	-0.332175	P78347-2;P78347-4;P78347-3;P78347;P78347-5;C9J6M0;A0A087WW90;A0A0D9SF80;Q86UP8-3;Q86UP8;Q6EKJ0;Q86UP8-4;Q86UP8-2;Q6EKJ0-2;Q86UP8-5	P78347-2;P78347-4;P78347-3;P78347	General transcription factor II-I	GTF2I	237.6	6059300000	323	29.2356	29.445	29.2316	29.3157	29.0078	28.5922
	0.933447	0.456095	P78356;P78356-2;A0A087WT35;S4R320	P78356;P78356-2	Phosphatidylinositol 5-phosphate 4-kinase type-2 beta	PIP4K2B	20.004	406830000	47	24.8457	25.3645	24.7349	25.2077	25.4905	25.6151
	0.350483	0.346842	P78362;P78362-2;H7C5L6;H7C521;F8WBW4	P78362;P78362-2;H7C5L6	SRSF protein kinase 2;SRSF protein kinase 2 N-terminal;SRSF protein kinase 2 C-terminal	SRPK2	16.939	219520000	34	23.9078	24.3073	24.5006	24.8957	23.8446	25.016
	0.911175	0.247839	P78371;P78371-2;F5GWF6;F8VQ14	P78371;P78371-2;F5GWF6;F8VQ14	T-complex protein 1 subunit beta	CCT2	323.31	29603000000	488	31.3963	31.267	31.3224	31.5971	31.3566	31.7754
	0.237106	0.0561072	P78406;E9PQ57;E9PPG9;B0QZ36;B0QZ37	P78406;E9PQ57;E9PPG9	mRNA export factor	RAE1	42.448	758780000	91	26.0255	26.3132	26.1647	26.2943	26.2288	26.1486
	0.0109359	-0.00794792	Q5TA02;P78417-3;P78417;Q5TA01;P78417-2	Q5TA02;P78417-3;P78417;Q5TA01;P78417-2	Glutathione S-transferase omega-1	GSTO1	53.474	3274200000	102	28.41	28.2833	28.5367	28.5627	27.9517	28.6917
	2.3934	-0.396255	P78527;P78527-2;F5GX40;H0YG84	P78527;P78527-2	DNA-dependent protein kinase catalytic subunit	PRKDC	323.31	14514000000	982	30.7003	30.7888	30.6092	30.328	30.3605	30.2211
	1.36788	1.09366	P80723;P80723-2	P80723	Brain acid soluble protein 1	BASP1	323.31	29713000000	282	30.6155	30.9765	30.7499	31.9404	31.2234	32.4591
	0.00572283	0.00387828	P82663;E7EPW2;P82663-3;P82663-2	P82663;E7EPW2;P82663-3;P82663-2	28S ribosomal protein S25, mitochondrial	MRPS25	6.3414	114800000	23	23.3445	23.9021	23.9941	23.916	23.732	23.6044
	0.0608496	0.115757	P82909;D6R941	P82909;D6R941	28S ribosomal protein S36, mitochondrial	MRPS36	12.973	173940000	31	24.1581	23.7623	23.1881	23.7998	22.7946	24.8615
	0.7537	0.425654	P82979;H0YHG0;F8VZQ9;F8VS12	P82979;H0YHG0;F8VZQ9	SAP domain-containing ribonucleoprotein	SARNP	95.691	3509400000	91	27.78	28.423	28.3141	28.8091	28.2684	28.7166
	0.467561	0.704552	P83876;O14835;K7ES07;K7EPA6;K7EJU2;K7ESL1;K7EMX5	P83876;O14835;K7ES07	Thioredoxin-like protein 4A	TXNL4A	24.52	205350000	27	24.1256	24.6134	22.6394	24.9979	24.4218	24.0723
	0.422814	0.111359	P84077;P61204;F5H423;P61204-2;F5H0C7;H0YGG7;F5H1V1;F5H6T5;F8WDB3	P84077;P61204;F5H423;P61204-2	ADP-ribosylation factor 1;ADP-ribosylation factor 3	ARF1;ARF3	160.6	10214000000	91	29.9982	29.7719	29.9845	29.8634	30.0803	30.145
	0.156138	0.0959237	P84085;C9J1Z8	P84085;C9J1Z8	ADP-ribosylation factor 5	ARF5	37.312	1393200000	34	27.0016	27.0491	27.055	27.5765	27.0036	26.8134
	0.129669	0.11036	P84090;G3V279	P84090;G3V279	Enhancer of rudimentary homolog	ERH	42.032	2455800000	64	27.7001	27.979	27.6203	27.794	27.4157	28.4208
	0.305213	0.260696	P84103-2;P84103;A0A087X2D0	P84103-2;P84103;A0A087X2D0	Serine/arginine-rich splicing factor 3	SRSF3	22.242	2954400000	84	27.5269	28.0863	28.1069	28.3937	27.5893	28.5192
	0.81052	-0.20615	P85037;P85037-2;U3KQ26	P85037;P85037-2	Forkhead box protein K1	FOXK1	49.271	370050000	57	25.1525	25.1141	25.4591	25.1168	25.0246	24.9658
	0.842829	0.936066	P98160;A0A3B3IT11;A0A0U1RQT3	P98160	Basement membrane-specific heparan sulfate proteoglycan core protein;Endorepellin;LG3 peptide	HSPG2	323.31	2144500000	242	26.6733	27.6426	27.779	28.3478	27.6202	28.9352
	0.477856	1.12164	P98172	P98172	Ephrin-B1	EFNB1	20.028	233840000	28	22.0123	23.2087	24.4157	25.208	24.9444	22.8492
	0.045146	-0.0182304	P98175-2;P98175;P98175-5;P98175-4;P98175-3	P98175-2;P98175;P98175-5;P98175-4;P98175-3	RNA-binding protein 10	RBM10	57.294	676450000	88	25.9045	25.9845	26.1903	26.0923	26.1396	25.7928
	1.1244	0.563317	Q00059;H7BYN3;Q00059-2	Q00059;H7BYN3;Q00059-2	Transcription factor A, mitochondrial	TFAM	22.19	1676700000	92	26.5454	27.0326	27.0444	27.6095	27.0999	27.6029
	1.21552	0.533226	Q00325-2;Q00325;F8VVM2;F8VWQ0;F8VZL5;F8VWR4	Q00325-2;Q00325;F8VVM2	Phosphate carrier protein, mitochondrial	SLC25A3	93.592	11493000000	192	29.6776	29.8056	29.7636	30.1099	30.0506	30.686
	0.961324	0.105449	Q00535;Q00535-2;F8VXD2;A0A2R8YEB7;K7ELV5;F8VYH9;F8VZZ0;F8VTV8;F8VWX7;F8VZ51;K7EJ83;A0A2R8Y644;Q9BVE2;A0A2R8YD28;A0A2R8YF61;J3QSD7;P11802-2;P11802;Q00526;Q96Q40-6;Q96Q40-4;Q96Q40-3;Q96Q40-5;Q96Q40;Q07002;Q07002-3;Q9NYV4-3;Q9NYV4-2;Q9NYV4	Q00535;Q00535-2	Cyclin-dependent-like kinase 5	CDK5	28.019	824630000	74	26.2073	26.281	26.2314	26.4349	26.3229	26.2783
	2.10898	0.501174	Q00577	Q00577	Transcriptional activator protein Pur-alpha	PURA	11.939	207420000	37	24.0662	23.9234	24.1439	24.3975	24.6624	24.5771
	0.507146	0.237918	Q00688;G3V5F2	Q00688	Peptidyl-prolyl cis-trans isomerase FKBP3	FKBP3	91.863	6064700000	148	28.7688	29.0951	29.244	29.4717	28.9798	29.3701
	1.42284	1.00517	Q00765;E2QRG8;B7Z332;B7Z510;H0Y8J8;Q00765-2	Q00765	Receptor expression-enhancing protein 5	REEP5	18.758	929060000	32	25.8273	25.7236	25.8164	27.1096	26.1401	27.1332
	1.42388	-0.277318	Q00796;H0YLA4;H0YKB3;Q00796-2	Q00796;H0YLA4	Sorbitol dehydrogenase	SORD	96.842	1555100000	108	27.5346	27.5464	27.5276	27.0789	27.365	27.3327
	0.431579	0.2896	Q00839-2;Q00839;A0A1W2PP35;A0A1X7SBS1;A0A1W2PPS1;Q5RI18;A0A1W2PPH7;A0A1W2PPL4;A0A1W2PQL0;A0A1W2PP34;A0A1W2PQ74;A0A1W2PRZ7;A0A1W2PQD4;A0A1W2PRI6;A0A1W2PPE9;A0A1W2PNG3;A0A087WVI9;A0A1W2PP22	Q00839-2;Q00839;A0A1W2PP35;A0A1X7SBS1;A0A1W2PPS1;Q5RI18;A0A1W2PPH7;A0A1W2PPL4;A0A1W2PQL0;A0A1W2PP34;A0A1W2PQ74;A0A1W2PRZ7	Heterogeneous nuclear ribonucleoprotein U	HNRNPU	323.31	23640000000	399	30.5229	31.3569	31.07	31.3684	30.9783	31.4719
	0.0342169	-0.0123971	Q01082;A0A087WUZ3;Q01082-2;F8W6C1	Q01082;A0A087WUZ3;Q01082-2	Spectrin beta chain, non-erythrocytic 1	SPTBN1	323.31	22972000000	1257	31.097	31.0623	31.1556	31.2643	30.863	31.1504
	0.660557	-0.304667	Q01085;Q01085-2;E7ETJ9	Q01085;Q01085-2;E7ETJ9	Nucleolysin TIAR	TIAL1	34.549	698760000	57	26.0372	26.5718	26.4619	25.9434	26.3125	25.9011
	1.89069	0.79965	Q01433-5;Q01433-2;Q01433;H0Y360;Q01433-3;Q01433-4;E9PIJ1;H0YCL9;E9PJF6;H0YF16	Q01433-5;Q01433-2;Q01433;H0Y360;Q01433-3;Q01433-4	AMP deaminase 2	AMPD2	67.762	1156400000	102	26.2943	26.2139	26.0378	26.9589	26.6978	27.2883
	0.439689	-0.197262	Q01459	Q01459	Di-N-acetylchitobiase	CTBS	18.751	341090000	37	25.0595	24.8854	25.0778	24.536	25.1559	24.739
	0.731455	0.286224	Q01469;I6L8B7;A8MUU1	Q01469;I6L8B7	Fatty acid-binding protein, epidermal	FABP5	126.49	5540700000	98	28.6411	28.8068	28.8743	29.391	28.8913	28.8986
	0.372013	-0.18576	Q01484;Q01484-5;Q01484-2;E9PHW9;A0A0U1RQN6;B7Z651	Q01484;Q01484-5;Q01484-2;E9PHW9;A0A0U1RQN6	Ankyrin-2	ANK2	310.53	894780000	157	26.834	26.2563	26.5717	26.5268	26.4583	26.1196
	0.518169	0.341884	Q01581;D6RIW1	Q01581	Hydroxymethylglutaryl-CoA synthase, cytoplasmic	HMGCS1	226.38	5754300000	199	28.7633	29.109	29.2952	29.7289	29.543	28.9214
	0.206604	0.192501	Q01628;E9PS44;H7BYV1;E9PQN9;P13164;Q01629;C9JQL5	Q01628;E9PS44	Interferon-induced transmembrane protein 3	IFITM3	22.193	291890000	28	25.5315	24.6027	24.462	24.9448	25.3196	24.9093
	1.13323	0.294596	Q01813;Q01813-2;B1APP6;B1APP8;Q5VSR5;H0Y757;V9GY25;H0Y3Y3;V9GYV7	Q01813;Q01813-2	ATP-dependent 6-phosphofructokinase, platelet type	PFKP	151.85	1536100000	162	27.0138	26.8316	27.0703	27.2402	27.4492	27.1101
	0.983859	-1.99689	Q01995;H0YCU9;E9PJ32	Q01995;H0YCU9	Transgelin	TAGLN	24.295	431540000	47	26.8565	25.5221	25.3588	22.8483	25.5383	23.3602
	1.31296	0.188255	Q02218;E9PCR7;A0A0D9SFS3;E9PDF2;Q02218-2;E9PFG7;Q02218-3;C9J4G7;Q9ULD0;Q9ULD0-3;Q9ULD0-2	Q02218;E9PCR7;A0A0D9SFS3;E9PDF2;Q02218-2;E9PFG7	2-oxoglutarate dehydrogenase, mitochondrial	OGDH	114.28	2105500000	212	27.6242	27.5251	27.476	27.8173	27.6403	27.7324
	0.518866	0.129155	Q02252-2;Q02252;G3V4Z4	Q02252-2;Q02252;G3V4Z4	Methylmalonate-semialdehyde dehydrogenase [acylating], mitochondrial	ALDH6A1	114.74	3650000000	197	28.2023	28.4413	28.5482	28.4907	28.4851	28.6036
	0.136131	-0.078057	Q02543;M0R3D6;M0R1A7;M0R117;M0R0P7	Q02543;M0R3D6;M0R1A7;M0R117;M0R0P7	60S ribosomal protein L18a	RPL18A	17.169	1998800000	89	27.6712	27.5566	27.7182	27.7076	27.1654	27.8387
	1.32483	0.421258	Q02750;Q02750-2;H3BRW9	Q02750;Q02750-2	Dual specificity mitogen-activated protein kinase kinase 1	MAP2K1	87.912	827310000	66	26.0125	25.9338	26.0405	26.5928	26.1284	26.5294
	1.08137	0.441956	Q02790;H0YFG2;F5H1U3;F5H120	Q02790	Peptidyl-prolyl cis-trans isomerase FKBP4;Peptidyl-prolyl cis-trans isomerase FKBP4, N-terminally processed	FKBP4	303.9	14809000000	458	29.8468	30.2178	30.1905	30.3065	30.4596	30.8148
	0.465761	-0.267403	Q02809;Q02809-2;Q5JXB7;Q5JXB8	Q02809;Q02809-2	Procollagen-lysine,2-oxoglutarate 5-dioxygenase 1	PLOD1	173.79	2181700000	214	28.2711	27.5156	27.9178	27.4421	27.8503	27.6097
	0.946905	0.278278	Q02818;H7BZI1;C9JKZ2;C9JBD3;C9J3C1	Q02818;H7BZI1	Nucleobindin-1	NUCB1	75.078	2711200000	142	27.9731	27.8469	27.9553	28.3172	27.9407	28.3523
	0.242367	0.140999	Q02878;F8VZ45;U3KQR5;F8VR69;F8VZA3;F8VWR1;F8VU16	Q02878	60S ribosomal protein L6	RPL6	213.52	11552000000	180	29.8935	30.1442	30.2726	30.4475	29.8429	30.4429
	0.977208	-0.507989	Q02952-3;Q02952-2;Q02952	Q02952-3;Q02952-2;Q02952	A-kinase anchor protein 12	AKAP12	323.31	7365400000	525	30.1487	29.5157	29.7114	29.258	29.0277	29.5661
	1.36381	0.457605	Q02978;I3L1P8;Q02978-2	Q02978;I3L1P8;Q02978-2	Mitochondrial 2-oxoglutarate/malate carrier protein	SLC25A11	196.12	4488600000	172	28.2755	28.3013	28.5283	29.0948	28.6781	28.7051
	0.272646	0.214935	Q03252	Q03252	Lamin-B2	LMNB2	239.18	12395000000	363	29.6043	30.3451	30.3263	30.427	29.9144	30.579
	0.317548	0.407269	Q04446;E9PGM4	Q04446;E9PGM4	1,4-alpha-glucan-branching enzyme	GBE1	24.499	226410000	38	24.7915	23.2225	24.6057	24.263	24.7762	24.8024
	0.508479	-0.243828	Q04760;Q04760-2	Q04760;Q04760-2	Lactoylglutathione lyase	GLO1	90.999	9735400000	121	30.3865	30.1151	29.6793	29.762	29.8962	29.7912
	0.102235	0.0661837	Q04828;A6NHU4;S4R3Z2;A0A0A0MSS8;P42330;S4R3D5;P17516	Q04828;A6NHU4;S4R3Z2;A0A0A0MSS8;P42330	Aldo-keto reductase family 1 member C1;Aldo-keto reductase family 1 member C3	AKR1C1;AKR1C3	24.623	435190000	28	25.66	25.3321	25.3222	25.9009	25.393	25.2189
	0.231487	-0.125367	Q04837;A0A0G2JLD8;E7EUY5;C9K0U8	Q04837;A0A0G2JLD8;E7EUY5;C9K0U8	Single-stranded DNA-binding protein, mitochondrial	SSBP1	302.25	1927300000	92	28.0943	27.517	27.5122	27.4888	27.4997	27.7589
	1.14952	0.576244	Q04917;A2IDB2;F8WEB6;A2IDB1	Q04917;A2IDB2	14-3-3 protein eta	YWHAH	155.43	8746100000	179	29.2701	29.5715	29.3857	30.0675	29.5721	30.3165
	0.463492	-0.337361	Q05048;A0A0A0MSZ9;A3KFI9	Q05048;A0A0A0MSZ9	Cleavage stimulation factor subunit 1	CSTF1	30.655	299910000	39	24.8495	25.0956	24.9852	25.0187	24.8666	24.0328
	1.30468	-0.193457	Q05397-7;Q05397;Q05397-5;H0YBP1;E7ESA6;Q05397-2;H0YB16;H0YBZ1;E9PEI4;B4DWJ1;Q05397-6;Q05397-3;E5RHD8;Q05397-4;H0YB99;E5RI03;E5RIK4;E5RG54;E5RH48;E5RH01;E5RG66;E5RI72;E5RFW9;E5RJP0;E5RGA6;E5RH08;H0YAS0;H0YB33;E5RJQ2;E5RG80;Q14289-2;Q14289	Q05397-7;Q05397;Q05397-5;H0YBP1;E7ESA6;Q05397-2;H0YB16;H0YBZ1;E9PEI4	Focal adhesion kinase 1	PTK2	41.885	638030000	91	26.1958	26.276	26.1412	25.9144	26.113	26.0054
	0.712905	-0.285738	Q5T760;Q05519-2;Q05519;B4DWT1;Q5T757;S4R3C4	Q5T760;Q05519-2;Q05519;B4DWT1	Serine/arginine-rich splicing factor 11	SRSF11	16.696	662050000	53	25.8402	26.3013	26.2106	25.5993	25.927	25.9686
	0.807247	-0.390508	Q05682-4;Q05682-6;Q05682-2;Q05682;C9J813;C9JEK3;C9JE79;F8WE61	Q05682-4;Q05682-6;Q05682-2;Q05682;C9J813	Caldesmon	CALD1	264.53	3009500000	183	28.8572	28.2543	28.3246	28.0606	27.8997	28.3043
	0.307178	0.123473	Q06124-2;Q06124;Q06124-3;A0A1W2PPU4;A0A0U1RRI0;H0YF12	Q06124-2;Q06124;Q06124-3	Tyrosine-protein phosphatase non-receptor type 11	PTPN11	87.537	1557700000	166	26.936	27.3852	27.3422	27.1855	27.4328	27.4155
	0.367569	-0.171945	Q06203;D6RCC8;D6RE15	Q06203	Amidophosphoribosyltransferase	PPAT	96.171	998200000	91	26.4182	26.5965	26.6371	26.3988	26.6862	26.0509
	0.162047	-0.107991	Q06210-2;Q06210	Q06210-2;Q06210	Glutamine--fructose-6-phosphate aminotransferase [isomerizing] 1	GFPT1	253.46	3879900000	243	28.8603	28.2707	28.6558	28.715	28.6184	28.1293
	0.410532	-0.102693	Q06323;Q06323-3;Q06323-2;H0YLU2;H0YKK6	Q06323;Q06323-3;Q06323-2	Proteasome activator complex subunit 1	PSME1	143.05	7687600000	148	29.5249	29.6784	29.6038	29.691	29.4275	29.3806
	1.27311	0.559232	Q06830;A0A0A0MSI0;A0A0A0MRQ5	Q06830;A0A0A0MSI0	Peroxiredoxin-1	PRDX1	97.225	55400000000	274	31.5752	32.0526	32.1659	32.6095	32.295	32.567
	0.506497	-0.310736	Q07021;I3L3Q7;I3L3B0	Q07021;I3L3Q7;I3L3B0	Complement component 1 Q subcomponent-binding protein, mitochondrial	C1QBP	75.846	1652100000	65	27.5761	27.2028	27.574	26.8572	27.6134	26.9502
	0.0965845	-0.069795	Q07065	Q07065	Cytoskeleton-associated protein 4	CKAP4	323.31	23004000000	453	31.5652	30.8642	31.1928	31.1639	30.8468	31.4022
	0.432802	0.297509	Q07666;Q07666-3;Q07666-2	Q07666;Q07666-3;Q07666-2	KH domain-containing, RNA-binding, signal transduction-associated protein 1	KHDRBS1	323.31	8083500000	139	29.1967	29.6043	29.6055	30.003	29.2453	30.0506
	0.975467	-0.313709	Q07812-5;Q07812-8;Q07812;Q07812-2;Q07812-7;K4JQN1;I6LPK7;Q07812-6;Q07812-4;H0YA56	Q07812-5;Q07812-8;Q07812;Q07812-2;Q07812-7;K4JQN1	Apoptosis regulator BAX	BAX	45.234	786350000	59	26.4038	26.486	26.491	25.8628	26.2153	26.3615
	0.088143	-0.0541935	Q07954;H0YJI8;Q6PJ72;Q9NZR2	Q07954	Prolow-density lipoprotein receptor-related protein 1;Low-density lipoprotein receptor-related protein 1 85 kDa subunit;Low-density lipoprotein receptor-related protein 1 515 kDa subunit;Low-density lipoprotein receptor-related protein 1 intracellular domain	LRP1	268.08	2612600000	293	28.4745	27.9689	27.7561	27.9563	28.1087	27.972
	0.531807	-0.323831	Q07960;H0YE29;E9PNR6	Q07960;H0YE29	Rho GTPase-activating protein 1	ARHGAP1	131.73	2220500000	135	28.3047	27.7041	27.8515	27.5064	28.0176	27.3649
	0.0324591	-0.0216948	Q08211;Q08211-2;REV__H0YA90;REV__Q7Z6J0-3	Q08211	ATP-dependent RNA helicase A	DHX9	323.31	12852000000	496	29.9541	30.4426	30.3924	30.5344	29.9687	30.2209
	1.44676	-1.51776	Q08380;K7ESM3;K7EKQ5;K7EP36;K7EJY8;K7EQT9;K7ES75;K7EN99;K7ERZ6;K7EJD3	Q08380	Galectin-3-binding protein	LGALS3BP	70.425	1067000000	45	27.6016	27.8515	27.3377	25.9352	26.9457	25.3566
	0.634172	0.690528	Q08431-4;Q08431;X6R3G6;Q08431-3;Q08431-2;H0YKS8;A0A087WUV5	Q08431-4;Q08431;X6R3G6;Q08431-3;Q08431-2;H0YKS8	Lactadherin;Lactadherin short form;Medin	MFGE8	43.541	1059000000	94	24.8591	26.1837	26.4058	26.518	26.349	26.6532
	0.359999	-0.361553	Q08623;E7EVH9;Q08623-3;Q08623-4;Q08623-2	Q08623;E7EVH9;Q08623-3;Q08623-4;Q08623-2	Pseudouridine-5-phosphatase	HDHD1	52.285	737130000	69	26.1948	26.0891	26.5065	25.1188	26.4304	26.1565
	0.544308	0.842221	Q08722;A0A2R8Y484;Q08722-2;Q08722-3;Q08722-4;H7BYS8	Q08722;A0A2R8Y484;Q08722-2;Q08722-3;Q08722-4	Leukocyte surface antigen CD47	CD47	4.8288	742560000	22	23.9505	26.0062	25.9102	26.3878	25.9151	26.0907
	0.307851	0.109179	Q08752	Q08752	Peptidyl-prolyl cis-trans isomerase D	PPID	16.438	618150000	57	26.0109	25.8424	25.6459	25.7449	26.0529	26.0289
	0.0401728	-0.0911916	Q08945;A0A0U1RRK2	Q08945	FACT complex subunit SSRP1	SSRP1	10.325	208260000	29	23.0725	24.8013	24.6391	24.3201	23.0472	24.872
	0.432944	-0.266208	Q08AM6;H3BUU8;A0A087WT26;H3BQD9;Q08AM6-2;H3BN23	Q08AM6	Protein VAC14 homolog	VAC14	62.839	413670000	63	25.5976	25.1803	25.6667	24.8166	25.5539	25.2754
	0.386328	-0.207563	Q09028-3;Q09028;Q09028-2;Q09028-4;H0YF10;H0YCT5;H0YDK2;E9PNS6;H0YEU5;E9PNS2;C9JPP3;E9PIC4;E9PND5	Q09028-3;Q09028;Q09028-2;Q09028-4	Histone-binding protein RBBP4	RBBP4	131.17	4965400000	178	28.5608	29.2028	29.0121	28.6352	28.9583	28.5594
	0.185045	0.334861	Q09161;F2Z2T1	Q09161	Nuclear cap-binding protein subunit 1	NCBP1	26.644	325840000	37	23.0695	25.1134	25.0906	24.9891	24.7611	24.528
	0.738277	-0.594313	Q09666;E9PQE3;E9PJZ0;E9PKR9;E9PJC6;E9PLK4;Q09666-2	Q09666	Neuroblast differentiation-associated protein AHNAK	AHNAK	323.31	35998000000	1690	32.6127	31.6709	31.8878	31.4212	31.8889	31.0783
	0.530507	-0.611588	Q0VDG4-2;Q0VDG4;F8W0M9;C9JID8	Q0VDG4-2;Q0VDG4	Secernin-3	SCRN3	11.789	104230000	20	23.4795	23.6146	23.7412	23.2485	22.0334	23.7186
	0.273126	0.109847	Q10471;Q10471-2;F8VUJ3;Q8N4A0-2;Q8N4A0	Q10471	Polypeptide N-acetylgalactosaminyltransferase 2;Polypeptide N-acetylgalactosaminyltransferase 2 soluble form	GALNT2	52.67	525170000	75	25.725	25.472	25.5285	25.9353	25.4441	25.6757
	0.512436	0.237838	Q10713;Q10713-2;Q5SXN9	Q10713;Q10713-2	Mitochondrial-processing peptidase subunit alpha	PMPCA	76.708	873310000	86	26.2762	26.2159	26.362	26.582	26.152	26.8335
	1.45422	0.736861	Q12765;Q12765-2;Q12765-3;C9K052;C9J7U9;B8ZZP4	Q12765;Q12765-2;Q12765-3	Secernin-1	SCRN1	116.33	6559300000	197	28.7646	28.8299	28.8437	29.6653	29.0989	29.8845
	0.593004	-0.66884	Q12768;E7EQI7	Q12768;E7EQI7	WASH complex subunit strumpellin	KIAA0196	42.774	131900000	25	24.1421	23.9378	24.0424	23.9714	22.3776	23.7668
	1.05628	0.348394	Q12792;Q12792-3;Q12792-4;F8VS81;F8W1Q9;F8VRG3	Q12792;Q12792-3;Q12792-4;F8VS81	Twinfilin-1	TWF1	172.36	1131300000	116	26.464	26.6761	26.4463	26.9913	26.6058	27.0345
	0.341077	-0.112331	Q12797-10;Q12797;E5RHK2;E5RG29;E5RG56;Q12797-9;Q12797-6;Q12797-11;Q12797-5;Q12797-8;Q12797-2;E5RHJ2;G3XAN5;A0A087WUJ2;A0A087WW51;Q12797-7;Q12797-4;Q12797-3	Q12797-10;Q12797	Aspartyl/asparaginyl beta-hydroxylase	ASPH	42.539	1044300000	92	26.9468	26.5901	26.849	26.8507	26.5746	26.6237
	0.160567	0.266626	Q12841-2;Q12841;C9J5G4	Q12841-2;Q12841	Follistatin-related protein 1	FSTL1	14.274	196470000	24	24.5968	24.309	22.772	23.6885	24.588	24.2013
	0.37528	0.37392	Q12857-3;B1AKN5;B1AKN8;Q12857-2;Q12857;Q12857-4;B1AKN7;B1AKN6;P08651-4;P08651-3;P08651-2;S4R3W2;S4R3K4;A0A286YEX4;P08651-5;P08651-6;P08651;S4R3K5	Q12857-3;B1AKN5;B1AKN8;Q12857-2;Q12857;Q12857-4;B1AKN7;B1AKN6	Nuclear factor 1 A-type;Nuclear factor 1	NFIA	21.095	109550000	19	23.5526	23.1722	22.8421	23.984	23.8665	22.8382
	0.028662	-0.0214583	Q12874	Q12874	Splicing factor 3A subunit 3	SF3A3	109.01	2490800000	147	27.7985	28.105	27.9624	27.8149	28.388	27.5986
	0.109161	-0.0622317	Q12904;Q12904-2;D6R937	Q12904;Q12904-2	Aminoacyl tRNA synthase complex-interacting multifunctional protein 1;Endothelial monocyte-activating polypeptide 2	AIMP1	95.28	1624800000	123	27.1987	27.1073	27.3801	27.396	27.3137	26.7897
	0.0745717	-0.0361977	Q12905;B4DY09;X6R6Z1;A0A0A0MRL0	Q12905;B4DY09	Interleukin enhancer-binding factor 2	ILF2	317.43	10551000000	269	29.7126	30.2328	30.1208	30.1031	29.8835	29.971
	0.337532	-0.173598	Q12907;D6RBV2;D6RDX1;D6RIU4;D6RBH1	Q12907;D6RBV2;D6RDX1;D6RIU4	Vesicular integral-membrane protein VIP36	LMAN2	89.223	1771800000	114	27.7123	27.3636	27.5725	27.6891	27.3953	27.0432
	0.0941373	-0.0125739	Q12931-2;Q12931;I3L0K7;I3L239;I3L253;I3L2D5	Q12931-2;Q12931;I3L0K7	Heat shock protein 75 kDa, mitochondrial	TRAP1	113.66	2456400000	186	27.985	27.8653	27.9093	27.8424	27.9417	27.9376
	0.967299	-0.447786	Q12955-5;Q12955-4;Q12955;Q12955-7;Q12955-6;A0A087WTF3;A0A087WZ65;H0Y3A4;H0YA66;A0A087WTE8;A0A087WVC2;D6RBY7;A0A087WWI5;D6RFK6;B1AQT1;A0A087WZ26;H0YAH5;A0A087X0L3;D6RF31;H0Y8Z4;H0Y951;A0A087WY90	Q12955-5;Q12955-4;Q12955;Q12955-7;Q12955-6;A0A087WTF3;A0A087WZ65	Ankyrin-3	ANK3	36.84	268050000	42	24.9421	24.8664	24.9105	24.0374	24.5879	24.7503
	0.415894	-0.16887	Q12972;A0A0A0MT09;Q12972-2	Q12972	Nuclear inhibitor of protein phosphatase 1;Activator of RNA decay	PPP1R8	30.444	297470000	37	24.7203	24.9492	25.2506	24.9628	24.7193	24.7314
	0.485501	0.177267	Q12996;E9PLP8;E9PJ06;Q12996-3;Q12996-2;H0YE74	Q12996;E9PLP8	Cleavage stimulation factor subunit 3	CSTF3	80.309	758660000	85	25.996	26.2838	25.9633	26.3191	26.4324	26.0234
	2.13899	0.204862	Q13011;M0R248;M0QZW4	Q13011;M0R248	Delta(3,5)-Delta(2,4)-dienoyl-CoA isomerase, mitochondrial	ECH1	323.31	5787600000	202	29.0702	29.0453	28.9466	29.2156	29.206	29.2551
	1.14573	1.33552	Q13015	Q13015	Protein AF1q	MLLT11	78.016	294150000	36	23.8619	22.9411	24.721	24.8746	25.1264	25.5295
	1.07964	0.512128	Q13033-2;Q13033;G3V340;G3V3G7;H0YJZ4;H0YJT2	Q13033-2;Q13033;G3V340	Striatin-3	STRN3	60.998	330330000	66	24.8731	24.5384	24.7649	25.5599	24.8713	25.2815
	0.543416	0.466424	Q13045;Q13045-3;Q13045-2;J3KS54;J3QQQ2;J3QLR6;J3QQU5;K7EQZ7;J3KT47;J3KS39	Q13045;Q13045-3;Q13045-2	Protein flightless-1 homolog	FLII	55.258	291120000	64	24.5847	25.0691	23.8108	24.7595	25.0634	25.0411
	0.350858	-0.357807	Q13085-3;Q13085-2;Q13085;Q13085-4;Q59FY4;A0A087WYS8	Q13085-3;Q13085-2;Q13085;Q13085-4;Q59FY4	Acetyl-CoA carboxylase 1;Biotin carboxylase	ACACA	72.265	470430000	117	25.884	25.1974	26.0501	25.1178	26.0109	24.9294
	0.503235	-0.480721	Q13123;E7EQZ7;D6REL4;D6RAY9	Q13123;E7EQZ7	Protein Red	IK	13.978	209830000	30	23.9047	24.8937	24.9555	23.7427	24.5635	24.0055
	0.009997	0.0063235	Q13131;Q13131-2;Q96E92	Q13131;Q13131-2	5-AMP-activated protein kinase catalytic subunit alpha-1	PRKAA1	25.309	404580000	60	25.6546	25.3515	25.009	25.2095	25.3017	25.5228
	0.389281	0.225969	Q13148;A0A087WX29;B1AKP7;G3V162;A0A087X260;A0A087WYY0;A0A0A0N0M3;K7EN94;K7EJM5;A0A087WXQ5;A0A087WV68;A0A087WXV3;Q13148-4;A0A1W2PNU8;A0A087WW61;A0A087WX67;K7EJ99;A0A0A0MSV7;A0A087WZC9;A0A087WZM1;A0A087WYE7;A0A087WTZ4;K7EL26	Q13148;A0A087WX29;B1AKP7;G3V162;A0A087X260;A0A087WYY0;A0A0A0N0M3;K7EN94;K7EJM5;A0A087WXQ5;A0A087WV68	TAR DNA-binding protein 43	TARDBP;TDP43	147.73	3875400000	140	28.1889	28.5987	28.5583	28.7058	28.3013	29.0166
	0.0230115	-0.0131823	Q13151	Q13151	Heterogeneous nuclear ribonucleoprotein A0	HNRNPA0	150.78	9527700000	145	29.3096	29.4762	29.5315	29.6255	29.0679	29.5843
	0.460623	0.241421	Q13153;B3KNX7;Q13153-2;E9PM17;H0YCG5;H0YCM0;E9PKH9;E9PRP6;E9PMP2;E9PQW5	Q13153;B3KNX7;Q13153-2;E9PM17	Serine/threonine-protein kinase PAK 1;Non-specific serine/threonine protein kinase	PAK1	113.53	1367500000	117	26.7535	27.1656	26.9587	26.819	27.4359	27.3472
	0.914195	0.126562	Q13155;A8MU58;Q13155-2	Q13155;A8MU58;Q13155-2	Aminoacyl tRNA synthase complex-interacting multifunctional protein 2	AIMP2	182.44	1132400000	113	26.6621	26.7609	26.7899	26.7681	26.8788	26.9457
	0.0550557	-0.0138543	Q13162;H7C3T4;A6NJJ0;A6NG45	Q13162;H7C3T4	Peroxiredoxin-4	PRDX4	81.983	4207600000	135	28.5939	28.5165	28.656	28.7205	28.545	28.4593
	0.745875	0.253423	Q13177;H7C1X3	Q13177	Serine/threonine-protein kinase PAK 2;PAK-2p27;PAK-2p34	PAK2	214.86	4864700000	261	28.3946	28.8975	28.7909	28.98	28.9761	28.887
	0.563579	0.205627	Q13185;C9JMM0;B8ZZ43;S4R2Y4	Q13185	Chromobox protein homolog 3	CBX3	75.7	1923000000	67	27.3138	27.5174	27.4602	27.8587	27.6995	27.35
	0.185301	-0.101981	Q13190-4;Q13190;E9PNU4;Q13190-3;Q13190-2;H7C3X5;E9PP18;E9PRW9	Q13190-4;Q13190;E9PNU4;Q13190-3;Q13190-2;H7C3X5	Syntaxin-5	STX5	20.897	280800000	32	24.9092	24.7235	25.0006	24.8206	25.0864	24.4204
	0.86548	0.181849	Q13200;Q13200-3;Q13200-2;C9JPC0;H7C1H2;H7C2Q3;F8WBS8	Q13200;Q13200-3;Q13200-2	26S proteasome non-ATPase regulatory subunit 2	PSMD2	243.42	6154300000	336	29.0509	29.2807	29.1267	29.3899	29.1945	29.4194
	0.871494	0.238447	Q13217;X6R9L0	Q13217;X6R9L0	DnaJ homolog subfamily C member 3	DNAJC3	15.867	226360000	37	24.382	24.6928	24.3179	24.764	24.7469	24.5972
	0.8371	-0.596354	Q13228;Q13228-4;Q13228-2;Q13228-3;A6PVX1;H0Y532;F2Z2W8;F8WCR4;C9JVL0	Q13228;Q13228-4;Q13228-2;Q13228-3;A6PVX1	Selenium-binding protein 1	SELENBP1	74.806	2507100000	116	28.6122	28.0309	28.048	27.4815	28.1585	27.262
	0.0190952	0.0198816	Q13242;H0YIB4;S4R3G0	Q13242;H0YIB4	Serine/arginine-rich splicing factor 9	SRSF9	25.839	1023300000	91	26.1943	26.7221	26.9268	27.1193	26.19	26.5935
	1.18007	-0.233693	Q13263;Q13263-2;M0R0K9;M0R3C0;M0R2I3	Q13263;Q13263-2;M0R0K9	Transcription intermediary factor 1-beta	TRIM28	323.31	16979000000	451	30.7519	30.865	30.8637	30.7634	30.5009	30.5151
	1.16877	-0.3793	Q13283;E5RI46;E5RIF8;E5RH42;E5RIZ6;E5RJU8;Q13283-2;E5RH00	Q13283	Ras GTPase-activating protein-binding protein 1	G3BP1	53.308	1449700000	102	27.3264	27.3824	27.3097	26.8869	27.2505	26.743
	0.953807	-0.784953	Q13308;Q13308-6;Q13308-4;Q13308-2;Q13308-3;Q13308-5;H0Y8F1;C9JQR6;Q86X91;H7C5L0;F8WDG7;C9J9E8	Q13308;Q13308-6;Q13308-4;Q13308-2;Q13308-3;Q13308-5	Inactive tyrosine-protein kinase 7	PTK7	217.6	3256400000	201	29.2767	28.4023	28.5163	27.7702	28.4776	27.5927
	0.483542	0.153507	Q13347;Q5TFK1	Q13347	Eukaryotic translation initiation factor 3 subunit I	EIF3I	77.791	2383700000	112	27.5957	27.8019	27.9122	28.068	27.7259	27.9764
	0.345299	0.190772	Q13363-2;Q13363;D6RAX2;H0Y8W7;E7ESU7;E7EPF8;H0Y9M9;E9PGB1;H0Y8U5	Q13363-2;Q13363;D6RAX2;H0Y8W7	C-terminal-binding protein 1	CTBP1	66.106	2442900000	93	27.8172	27.9028	27.8968	28.2874	27.6085	28.2933
	2.07698	0.254133	Q13423;E9PCX7;D6RAI5;D6RHU2;H0Y8P5;D6RCR6	Q13423;E9PCX7	NAD(P) transhydrogenase, mitochondrial	NNT	202.78	5191100000	323	28.6812	28.7532	28.746	29.0495	28.8905	29.0028
	0.00744116	0.00747935	Q13428-2;Q13428-8;Q13428;Q13428-3;Q13428-4;A0A3B3IS06;J3KQ96;E7ETY2;Q13428-6;Q13428-7;H0Y8Y7;Q13428-5;H0YA99;A0A2R8Y857	Q13428-2;Q13428-8;Q13428;Q13428-3;Q13428-4;A0A3B3IS06;J3KQ96;E7ETY2;Q13428-6;Q13428-7;H0Y8Y7;Q13428-5	Treacle protein	TCOF1	32.385	644350000	62	26.0077	25.9157	25.9686	26.2057	25.3217	26.3871
	0.233654	-0.106253	Q13435;E9PPJ0;H0YCG1;E9PJ04;H0YEX5;E9PJT3	Q13435;E9PPJ0	Splicing factor 3B subunit 2	SF3B2	192.54	3716800000	216	28.2831	28.6088	28.6775	28.6109	28.168	28.4717
	0.222431	0.182864	Q13442;F8WBW6	Q13442	28 kDa heat- and acid-stable phosphoprotein	PDAP1	110.76	1861900000	70	26.9094	27.603	27.5904	27.9996	27.328	27.3237
	0.574579	-0.698344	Q13445;K7EIN4;K7EQ63	Q13445;K7EIN4;K7EQ63	Transmembrane emp24 domain-containing protein 1	TMED1	21.681	150290000	21	24.6901	24.2305	24.3184	24.0983	22.6813	24.3644
	0.978746	0.248323	Q13492-3;Q13492-2;Q13492-5;Q13492;Q13492-4;E9PI56;E9PKP6;E9PLJ8;E9PK13;H0YCY1;E9PJT1	Q13492-3;Q13492-2;Q13492-5;Q13492;Q13492-4	Phosphatidylinositol-binding clathrin assembly protein	PICALM	75.715	883320000	76	26.3105	26.3596	26.2166	26.3669	26.5156	26.7492
	0.323848	-0.447655	Q13501-2;Q13501;E7EMC7;E9PFW8;C9JRJ8;E3W990	Q13501-2;Q13501;E7EMC7;E9PFW8	Sequestosome-1	SQSTM1	37.588	200190000	40	24.2224	24.0431	24.4936	22.7951	24.6972	23.9239
	0.166089	-0.256225	Q13505-3;Q13505;A0A0C4DFQ1;Q13505-2	Q13505-3;Q13505;A0A0C4DFQ1;Q13505-2	Metaxin-1	MTX1	12.73	198880000	31	24.0189	23.9626	24.6785	24.7352	22.9383	24.2179
	1.35002	0.849887	Q13509;A0A0B4J269;Q13509-2;G3V2A3;G3V5W4;G3V2R8;G3V3R4;G3V2N6;G3V542;G3V3J6;G3V3W7	Q13509;A0A0B4J269;Q13509-2	Tubulin beta-3 chain	TUBB3	275.43	50738000000	380	31.1507	32.1178	31.8749	32.6086	32.6147	32.4696
	0.217055	0.155577	Q13523;H0YDJ3	Q13523;H0YDJ3	Serine/threonine-protein kinase PRP4 homolog	PRPF4B	32.024	409910000	51	24.9141	25.4495	25.0352	25.442	24.8419	25.5817
	0.0404496	0.0839068	Q13526;K7EN45;K7EMU7	Q13526;K7EN45;K7EMU7	Peptidyl-prolyl cis-trans isomerase NIMA-interacting 1	PIN1	45.229	314380000	39	25.1285	25.801	23.667	24.8903	25.5269	24.4308
	1.32583	-1.73883	Q13547;Q5TEE2	Q13547;Q5TEE2	Histone deacetylase 1	HDAC1	28.31	206800000	29	24.9952	25.0685	25.1717	24.4887	22.4012	23.129
	1.46371	0.414282	Q13561;Q13561-3;Q13561-2;F8W1I6;H0YI98;F8VW18;H0YHL1;F8VX93;F8VRV7;F8W0U6	Q13561;Q13561-3;Q13561-2;F8W1I6;H0YI98;F8VW18	Dynactin subunit 2	DCTN2	248.74	5299600000	216	28.696	28.8669	28.7818	29.3553	28.9568	29.2755
	0.0311605	0.0180111	Q13564-2;Q13564;Q13564-3;Q13564-4;J3QLH4;J3KTE3;J3KRK3;H3BMR3;J3QRA5;H3BQW6	Q13564-2;Q13564;Q13564-3;Q13564-4	NEDD8-activating enzyme E1 regulatory subunit	NAE1	92.148	1282300000	85	26.6199	27.0464	27.0104	26.6563	27.1347	26.9397
	0.141055	0.160938	Q13573;G3V3A4;G3V4X8;G3V5R3	Q13573;G3V3A4;G3V4X8	SNW domain-containing protein 1	SNW1	68.69	671250000	65	25.446	26.3419	26.0836	26.3437	25.4716	26.5391
	0.20625	0.482204	Q13596;Q13596-2;Q13596-3;H0YK42;H0YK43	Q13596;Q13596-2;Q13596-3;H0YK42	Sorting nexin-1	SNX1	43.805	443840000	44	25.416	25.9723	23.0932	25.2636	25.6739	24.9905
	0.326805	0.117796	Q13616;A0A0C4DGX4	Q13616;A0A0C4DGX4	Cullin-1	CUL1	49.213	617130000	73	26.0383	25.9063	25.8846	25.7937	26.2682	26.1208
	0.528823	0.1244	Q13618-2;Q13618;Q13618-3;A0A087WTG3;H7C1L6;H7C399;A0A087X1R9	Q13618-2;Q13618;Q13618-3	Cullin-3	CUL3	209.79	2717100000	210	28.0553	27.9144	27.8794	27.9672	28.2497	28.0054
	0.689176	0.622313	Q13630;E9PKL9;E9PP14;A0A0J9YX13;E9PLH9;H0YCP7;E9PP60	Q13630;E9PKL9;E9PP14;A0A0J9YX13	GDP-L-fucose synthase	TSTA3	34.476	331820000	32	23.8893	25.0982	24.7308	24.9775	25.5992	25.0086
	0.584096	0.328601	Q13641	Q13641	Trophoblast glycoprotein	TPBG	56.791	1048200000	60	26.4456	26.1667	26.9612	26.711	27.0306	26.8179
	0.255708	1.29373	Q13642-1;Q13642-5;Q13642-4;Q5JXI8;Q13642;A0A0D9SFI6;A0A0D9SFB0;Q5JXH9;A0A0D9SFZ9;Q5JXH8;Q5JXH7;Q5JXI3;Q5JXI2;Q13642-3;A0A0D9SG53;A0A0D9SGB2;Q5JXI0	Q13642-1;Q13642-5;Q13642-4;Q5JXI8;Q13642	Four and a half LIM domains protein 1	FHL1	6.2633	1472100000	19	23.0621	23.8186	27.2796	27.7354	22.9506	27.3554
	1.48367	-0.38839	Q13724;Q13724-2;A0A3B3IRK6;C9J8D4;A0A3B3IRW2;A0A3B3IS52;A0A3B3ITC1;C9JDQ1;A0A3B3ITU6;B8ZZE2;A0A3B3IRI7;B4E3B8	Q13724;Q13724-2;A0A3B3IRK6;C9J8D4;A0A3B3IRW2;A0A3B3IS52	Mannosyl-oligosaccharide glucosidase	MOGS	167.53	1974200000	170	27.9053	27.6794	27.8339	27.2155	27.5087	27.5293
	0.43797	-0.118605	Q13838;Q13838-2;Q5STU3;A0A0G2JJZ9;F6WLT2;A0A140T9X3;A0A0A0MT12;F6TRA5;F6S4E6;A0A140T9X9;A0A140T996;F6UJC5;A0A140TA18;A0A140T973;A0A140T9K1;F6R6M7;A0A140T9L4;H0Y400;F6QYI9;A0A0G2JJL7;A0A0G2JHN7;F6U6E2;F6S2B7;A0A140T9K2;A0A140T9N3;F6SXL5;H0YCC6	Q13838;Q13838-2;Q5STU3;A0A0G2JJZ9;F6WLT2;A0A140T9X3;A0A0A0MT12;F6TRA5;F6S4E6	Spliceosome RNA helicase DDX39B	DDX39B	322.31	12538000000	277	30.1694	30.5197	30.3085	30.2922	30.2435	30.106
	0.792443	-0.201209	Q13867;K7ES02;K7ESE8;J3KSD8;J3KS79;K7ENH5;K7EMJ3	Q13867;K7ES02;K7ESE8;J3KSD8	Bleomycin hydrolase	BLMH	94.56	4375900000	224	28.7183	28.8788	28.8294	28.4735	28.5298	28.8195
	0.312218	-0.305126	Q13868;A3KFL2;Q13868-3;A3KFL1;Q13868-2;A3KFL5	Q13868;A3KFL2;Q13868-3;A3KFL1;Q13868-2;A3KFL5	Exosome complex component RRP4	EXOSC2	38.736	187720000	38	23.788	24.7204	24.332	24.0892	24.4169	23.4189
	0.995337	0.583613	Q13885	Q13885	Tubulin beta-2A chain	TUBB2A	116.76	93921000000	372	32.2976	33.1087	32.88	33.1206	33.5763	33.3402
	0.417023	0.197723	Q13907;Q13907-2;C9JKM8;C9JD53;Q9BXS1	Q13907;Q13907-2	Isopentenyl-diphosphate Delta-isomerase 1	IDI1	33.601	2288300000	97	27.4161	27.8775	28.0362	27.8201	28.0767	28.0262
	0.358473	0.126322	Q14008;Q14008-3;Q14008-2;E9PQH5;H0YDX5;H0YEK7;H0YCF6	Q14008;Q14008-3;Q14008-2	Cytoskeleton-associated protein 5	CKAP5	189.25	4120500000	362	28.4479	28.6402	28.785	28.7435	28.944	28.5645
	0.305208	-0.146256	Q14011;K7EJV1;K7EMY9;K7EPM4;K7EQR7;D6W5Y5;Q14011-2;K7ENX8;K7ELV6;K7EJV5;K7ELT6;K7ER40;K7EQX4;K7ENN6;K7EIF7;K7EQL0;Q14011-3	Q14011;K7EJV1;K7EMY9;K7EPM4;K7EQR7;D6W5Y5;Q14011-2;K7ENX8;K7ELV6;K7EJV5;K7ELT6;K7ER40	Cold-inducible RNA-binding protein	CIRBP	62.469	2466600000	80	28.2649	28.4082	27.8899	28.1466	28.174	27.8037
	1.76921	-0.606872	Q14019;H3BT58	Q14019;H3BT58	Coactosin-like protein	COTL1	91.841	2833700000	53	28.6929	28.2366	28.482	27.9349	27.7041	27.9519
	1.32772	1.10349	Q14112-2;Q14112;A0A087WZP6;H0YJV3	Q14112-2;Q14112;A0A087WZP6;H0YJV3	Nidogen-2	NID2	218.56	2360800000	187	26.5839	27.4929	27.6446	28.4319	27.9549	28.6451
	1.81339	-0.672173	Q14118	Q14118	Dystroglycan;Alpha-dystroglycan;Beta-dystroglycan	DAG1	34.387	250750000	48	24.7274	25.0255	25.0441	24.1973	24.0732	24.5101
	0.709618	-1.48581	Q14126;J3KSI6	Q14126	Desmoglein-2	DSG2	70.594	642270000	83	26.8817	25.8464	26.3695	25.3545	26.1613	23.1243
	1.22465	-0.229692	Q14152;Q14152-2	Q14152;Q14152-2	Eukaryotic translation initiation factor 3 subunit A	EIF3A	323.31	5644900000	380	29.3376	29.2493	29.1883	28.8957	29.1614	29.029
	0.317313	0.11269	Q14157;Q14157-5;Q14157-1;Q14157-3;F8W726;Q14157-4;Q5VU77;Q5VU78;Q5VU81;Q5VU80;Q5VU79;H0Y5H6	Q14157;Q14157-5;Q14157-1;Q14157-3;F8W726;Q14157-4;Q5VU77	Ubiquitin-associated protein 2-like	UBAP2L	236.91	1507400000	157	26.9799	27.1433	27.0894	27.4214	27.1832	26.946
	0.629359	-0.136016	Q14165;F5H1S8;H0YG07;F5GX14	Q14165;F5H1S8	Malectin	MLEC	169.64	2180200000	139	27.7857	27.7462	27.8416	27.5003	27.8227	27.6424
	0.8708	0.216981	Q14166;V9GY16	Q14166	Tubulin--tyrosine ligase-like protein 12	TTLL12	66.733	801900000	77	25.9567	26.332	26.1649	26.3542	26.4448	26.3055
	1.48649	-0.729782	Q14185;A0A096LNH6	Q14185;A0A096LNH6	Dedicator of cytokinesis protein 1	DOCK1	31.662	171670000	45	24.7474	24.43	24.5037	23.8255	24.1902	23.4759
	1.42735	0.925046	Q14194-2	Q14194-2	Dihydropyrimidinase-related protein 1	CRMP1	323.31	31935000000	465	30.393	31.3913	31.1489	31.9195	31.9334	31.8555
	1.17698	0.598987	Q14195-2	Q14195-2			323.31	59293000000	587	31.7613	32.5478	32.1536	32.8357	32.6024	32.8214
	1.5278	0.456631	Q14203-6;Q14203;E7EX90;Q14203-3;Q14203-4;Q14203-2;Q14203-5;Q6AWB1;E7EWF7;C9JJD0;C9JKG6;E9PCY0;C9JZA4;C9JTE5;C9JJN7;C9J1B7	Q14203-6;Q14203;E7EX90;Q14203-3;Q14203-4;Q14203-2;Q14203-5;Q6AWB1	Dynactin subunit 1	DCTN1;DKFZp686E0752	323.31	4723600000	340	28.429	28.6516	28.5037	29.221	28.8176	28.9156
	1.5893	0.319814	Q14204;A0A2R8Y706;A0A2R8YFZ7;A0A2R8Y5T0;A0A2R8Y6H2;A0A2R8Y542;A0A2R8Y6I5;A0A2R8YGC7;H0YJ21	Q14204	Cytoplasmic dynein 1 heavy chain 1	DYNC1H1	323.31	69291000000	2352	32.4367	32.6411	32.595	32.9337	32.741	32.9575
	0.199461	0.603458	Q14232;H0YGG4;Q14232-2;F5H0D0	Q14232	Translation initiation factor eIF-2B subunit alpha	EIF2B1	16.562	333130000	51	25.6238	25.3422	22.0856	25.0512	25.3482	24.4626
	0.165789	0.0470473	Q14240;Q14240-2;E7EQG2;J3KSN7;E7EMV8;E9PBH4;C9JUF0;F8WE11	Q14240;Q14240-2;E7EQG2	Eukaryotic initiation factor 4A-II;Eukaryotic initiation factor 4A-II, N-terminally processed	EIF4A2	299.77	5370400000	172	28.9953	28.968	28.9176	29.0221	28.8195	29.1805
	0.0801225	0.0242259	Q14247;Q14247-3;Q14247-2;H0YCD9;H0YEV2	Q14247;Q14247-3;Q14247-2	Src substrate cortactin	CTTN	97.114	1624400000	137	27.2839	27.3534	27.3023	27.4675	27.1304	27.4145
	0.774691	-0.119749	Q14257;Q14257-2;A8MXP8;H0YL43	Q14257;Q14257-2;A8MXP8	Reticulocalbin-2	RCN2	263.05	5470100000	196	29.1339	29.3415	29.2262	29.1176	29.0461	29.1787
	0.0337266	0.0184015	Q14315-2;Q14315	Q14315-2;Q14315	Filamin-C	FLNC	323.31	14801000000	736	30.6686	30.1528	30.6232	30.4113	30.424	30.6645
	0.466359	-0.209497	Q14318;Q14318-2;U3KQ64;A0A0A0MTJ1;Q14318-3;M0R2K9;U3KQI1;M0R1Q0;M0R1S6;M0R2Q6	Q14318;Q14318-2;U3KQ64;A0A0A0MTJ1;Q14318-3	Peptidyl-prolyl cis-trans isomerase FKBP8	FKBP8	73.055	587030000	69	25.8545	26.1407	26.0868	25.505	25.8449	26.1038
	0.00117879	-0.00209363	Q14320;B0S8I6	Q14320;B0S8I6	Protein FAM50A	FAM50A	8.6145	220130000	19	23.1604	24.8208	24.9034	24.0702	24.3527	24.4554
	0.709232	-0.348021	Q14353;A0A1W2PR36;Q14353-2;K7EM34	Q14353;A0A1W2PR36;Q14353-2	Guanidinoacetate N-methyltransferase	GAMT	24.207	180730000	37	24.6776	23.9374	24.5083	24.0308	24.0107	24.0378
	0.725665	-0.450147	Q14376;Q5QPP1;Q5QPP3;Q5QPP4;Q14376-2;Q5QPP9	Q14376;Q5QPP1;Q5QPP3;Q5QPP4;Q14376-2	UDP-glucose 4-epimerase	GALE	81.41	334970000	53	25.7204	25.062	25.2458	24.4961	25.1835	24.9982
	0.0839573	-0.0363509	Q14444-2;Q14444;G3V153;E9PLA9	Q14444-2;Q14444;G3V153;E9PLA9	Caprin-1	CAPRIN1	118.41	2176700000	155	27.7248	27.7318	27.7004	27.9605	27.4326	27.6548
	0.360205	0.111254	Q14498-2;Q14498-3;Q14498;G3XAC6;A0A0U1RQH7;H0Y4X3;A0A0U1RQW2;Q5QP23;Q5QP22;F8WF24;F2Z2Z5;A8MYG5;F2Z3E6;F8WF73;Q86U06-3;Q86U06-4;Q86U06-5;Q86U06-2;Q86U06;A0A087X122;G3V546;G3V5Z6;H0YJJ3;G3XAP0	Q14498-2;Q14498-3;Q14498;G3XAC6;A0A0U1RQH7;H0Y4X3	RNA-binding protein 39	RBM39	161.16	2785600000	167	27.781	28.2109	27.9501	28.0714	28.1524	28.052
	1.24439	0.42793	Q14554;Q14554-2;C9JY10;H7C4F9	Q14554	Protein disulfide-isomerase A5	PDIA5	44.109	521520000	62	25.7077	25.31	25.6538	26.0499	25.7838	26.1215
	0.0399283	-0.0312621	Q14558;Q14558-2;B4DP31;C9JNQ3	Q14558;Q14558-2;B4DP31	Phosphoribosyl pyrophosphate synthase-associated protein 1	PRPSAP1	36.738	336530000	68	24.9179	25.2509	25.0561	25.3986	25.1665	24.5661
	1.12191	-1.31032	Q14566	Q14566	DNA replication licensing factor MCM6	MCM6	196.39	793410000	98	26.8615	27.083	26.5721	26.2974	25.7735	24.5148
	0.640955	0.875804	Q14576-2;Q14576;K7EPB5	Q14576-2;Q14576	ELAV-like protein 3	ELAVL3	51.207	1378200000	107	25.3941	27.2505	26.7416	27.7836	26.8472	27.3829
	0.319174	-0.089468	Q14677-3;Q14677-2;Q14677;H0YD52	Q14677-3;Q14677-2;Q14677	Clathrin interactor 1	CLINT1	111.78	852250000	102	26.4549	26.2498	26.4874	26.1333	26.3848	26.4056
	0.293505	-0.139478	Q14683;G8JLG1;V9GY57;H0Y7K8;V9GYN9	Q14683;G8JLG1	Structural maintenance of chromosomes protein 1A;Structural maintenance of chromosomes protein	SMC1A	126.99	1824700000	183	27.2477	27.7305	27.415	27.5806	27.2416	27.1525
	0.832844	-0.509212	Q14694;Q14694-3;Q14694-2;H3BQP1;J3KT19;H3BNS8;H3BNA1;H3BNL0;Q68D90;H3BVF1	Q14694;Q14694-3;Q14694-2	Ubiquitin carboxyl-terminal hydrolase 10	USP10	45.316	412250000	73	25.1025	25.7569	25.8157	24.8925	25.3846	24.8705
	0.398699	0.156254	Q14696;H0YLI4;Q14696-2	Q14696	LDLR chaperone MESD	MESDC2	148.45	2007700000	102	27.5943	27.5736	27.4733	27.8157	27.3848	27.9094
	0.707182	0.342248	Q14738;E9PFR3;Q14738-2;Q14738-3;H0Y8C4;H7C5Q9;H0YJ49;H0YJ35	Q14738;E9PFR3;Q14738-2;Q14738-3;H0Y8C4	Serine/threonine-protein phosphatase 2A 56 kDa regulatory subunit delta isoform	PPP2R5D	71.948	1327600000	127	26.6358	26.8666	26.6698	27.3261	26.6531	27.2197
	1.41497	-0.432786	Q14739;C9JXK0;C9JES9	Q14739;C9JXK0	Lamin-B receptor	LBR	49.781	447450000	51	25.6309	25.4737	25.7325	25.2636	24.9411	25.3339
	0.217155	-0.136435	Q14789-4;Q14789-3;Q14789;Q14789-2;E7EU81;H0Y867	Q14789-4;Q14789-3;Q14789;Q14789-2;E7EU81	Golgin subfamily B member 1	GOLGB1	78.03	154860000	73	24.5484	24.194	23.9747	24.1363	24.3934	23.7781
	0.0560115	-0.0440858	Q14847;Q14847-2;C9J9W2;Q14847-3;F6S2S5;J3KSN1;K7ESD6	Q14847;Q14847-2;C9J9W2;Q14847-3	LIM and SH3 domain protein 1	LASP1	29.151	4441800000	91	29.238	28.4266	28.694	28.8999	28.4846	28.8419
	1.14244	-0.132425	Q14914;F2Z3J9;Q14914-2;Q5JVP2;F6XGT7	Q14914;F2Z3J9;Q14914-2	Prostaglandin reductase 1	PTGR1	121.86	2366500000	137	27.9588	27.8084	27.9435	27.7261	27.817	27.7703
	0.566757	-0.382973	Q14966;Q14966-3;Q14966-5;Q14966-4;Q14966-2;Q14966-6;A0A096LNS4;A0A096LPK8;C9JWN0	Q14966;Q14966-3;Q14966-5	Zinc finger protein 638	ZNF638	43.957	305220000	69	24.5399	25.3129	25.3101	24.4934	24.9799	24.5406
	1.49796	-0.221628	Q14974;Q14974-2;J3KTM9;J3QR48;J3QKQ5;J3QRG4;J3KS06	Q14974;Q14974-2;J3KTM9	Importin subunit beta-1	KPNB1	323.31	16828000000	402	30.8656	30.9524	30.7976	30.6766	30.7238	30.5503
	1.3674	0.365338	Q15007;A0A087X1R4;Q15007-2	Q15007	Pre-mRNA-splicing regulator WTAP	WTAP	29.082	309330000	54	24.7004	24.755	24.9236	25.3193	24.9606	25.1951
	0.978047	0.325482	Q15008;Q15008-4;Q15008-3;Q15008-2;C9J0E9;C9J7B7;H7C531	Q15008;Q15008-4;Q15008-3;Q15008-2	26S proteasome non-ATPase regulatory subunit 6	PSMD6	179.7	2636600000	136	27.9335	27.8461	27.7991	28.3205	27.8838	28.3509
	0.689003	-0.454416	Q15018	Q15018	BRISC complex subunit Abro1	FAM175B	19.149	213080000	43	24.4183	24.6835	24.6587	23.7237	24.6883	23.9852
	1.80053	-0.479266	Q15019;Q15019-2;Q15019-3;C9JB25;C9J938;C9IZU3;C9JQJ4;C9JZI2;A0A1B0GXJ2;C9JFT1;F8WB65;C9JT15;C9JSE7	Q15019;Q15019-2;Q15019-3;C9JB25	Septin-2	2002-09-01	302.51	11199000000	304	30.5543	30.1532	30.3917	29.8741	29.9355	29.8517
	0.301278	0.115566	Q15020;Q15020-4;F8VV04;Q15020-2;F8W667;F8VZM2;H0YHU8;F8VVK9;Q15020-3	Q15020;Q15020-4;F8VV04	Squamous cell carcinoma antigen recognized by T-cells 3	SART3	186.33	1467900000	134	27.0224	27.2192	27.035	27.3539	26.9231	27.3463
	0.0173334	-0.0291233	Q15021;E7EN77;F5H431;F5GZK7	Q15021;E7EN77	Condensin complex subunit 1	NCAPD2	10.689	41408000	12	23.2952	23.3719	23.2045	22.7253	22.686	24.3728
	0.0787766	0.0516211	Q15029-2;Q15029-3;Q15029;K7EP67;K7EJ74;K7EIT3;K7EIV5	Q15029-2;Q15029-3;Q15029	116 kDa U5 small nuclear ribonucleoprotein component	EFTUD2	196.34	4182700000	322	28.2789	28.7608	28.7928	28.7843	28.3445	28.8585
	0.449956	0.522623	Q15031;E9PHM2;C9JYR8	Q15031;E9PHM2	Probable leucine--tRNA ligase, mitochondrial	LARS2	16.107	103010000	24	24.0822	23.2423	22.4277	23.5607	23.7023	24.0571
	0.246975	-0.576403	Q15042;Q15042-3;Q15042-4;C9J1R5	Q15042;Q15042-3;Q15042-4	Rab3 GTPase-activating protein catalytic subunit	RAB3GAP1	29.003	246130000	57	24.8071	24.8539	24.3993	22.2885	24.9462	25.0962
	0.332514	0.10052	Q15046;Q15046-2;H3BVA8;J3KRL2;H3BPV7;H3BRC9	Q15046;Q15046-2	Lysine--tRNA ligase	KARS	160.97	4617100000	253	28.7545	28.7452	28.6515	29.0549	28.6657	28.7322
	0.311187	-0.117874	Q15056-2;Q15056	Q15056-2;Q15056	Eukaryotic translation initiation factor 4H	EIF4H	40.664	4040200000	96	28.6264	28.6452	28.7154	28.8095	28.5418	28.282
	0.456685	0.180812	Q15067-2;Q15067;Q15067-3;K7ENF1;K7ESC7;K7ELT1;I3L0T4;I3L2U4;I3L4S5	Q15067-2;Q15067;Q15067-3	Peroxisomal acyl-coenzyme A oxidase 1	ACOX1	71.87	576180000	87	25.5402	25.8188	25.9101	25.7246	26.1718	25.9151
	1.08977	0.261059	Q15075	Q15075	Early endosome antigen 1	EEA1	196.44	1053200000	196	26.5874	26.6806	26.7813	27.0562	26.7494	27.0267
	0.860033	-0.375148	Q15084-3;Q15084;Q15084-4;Q15084-5;Q15084-2	Q15084-3;Q15084;Q15084-4;Q15084-5;Q15084-2	Protein disulfide-isomerase A6	PDIA6	171.39	19253000000	230	31.24	31.0052	30.9465	30.3566	30.9834	30.7262
	1.08716	0.453985	Q15102;M0R389;M0R1K3;M0QZT2;M0QXS6;M0R323	Q15102;M0R389;M0R1K3;M0QZT2	Platelet-activating factor acetylhydrolase IB subunit gamma	PAFAH1B3	295.49	11057000000	229	29.7174	29.8595	29.8287	30.4066	29.8755	30.4854
	2.0043	0.743466	Q15121;Q15121-2;B1AKZ5	Q15121;Q15121-2;B1AKZ5	Astrocytic phosphoprotein PEA-15	PEA15	211.1	8007200000	104	28.8457	29.3326	29.2315	29.9977	29.8587	29.7839
	1.40843	-1.62187	Q15124;Q15124-2;Q5JTY7	Q15124;Q15124-2	Phosphoglucomutase-like protein 5	PGM5	47.894	754400000	68	27.4883	26.2981	26.373	25.1255	25.7312	24.4372
	0.0529911	0.0767148	Q15125;C9J719;C9JJ78	Q15125;C9J719;C9JJ78	3-beta-hydroxysteroid-Delta(8),Delta(7)-isomerase	EBP	53.218	524570000	26	25.2545	25.6057	25.7126	26.0412	24.6443	26.1175
	0.870157	-0.64537	Q15126	Q15126	Phosphomevalonate kinase	PMVK	65.068	783090000	67	26.3408	26.797	26.622	25.6107	26.5782	25.6348
	0.398195	-0.126409	Q15149;Q15149-7;Q15149-9;Q15149-5;Q15149-4;Q15149-6;Q15149-3;Q15149-2;H0YDN1;E9PMV1;E9PKG0;E9PQ28;E9PIA2	Q15149;Q15149-7;Q15149-9;Q15149-5;Q15149-4;Q15149-6;Q15149-3;Q15149-2;H0YDN1	Plectin	PLEC	323.31	6082100000	680	29.3841	29.0469	29.4186	29.1199	29.2795	29.0709
	0.189368	0.090915	Q15181;Q5SQT6	Q15181;Q5SQT6	Inorganic pyrophosphatase	PPA1	186.16	9182300000	256	29.4602	29.8865	29.6313	29.807	29.9516	29.4921
	0.251118	0.283733	Q15233;Q15233-2;H7C367;C9IZL7;C9JYS8;C9J4X2	Q15233;Q15233-2;H7C367;C9IZL7	Non-POU domain-containing octamer-binding protein	NONO	191.45	10160000000	284	29.1685	29.9791	29.9788	30.2731	29.283	30.4215
	0.138569	0.0427869	Q15257-2;Q15257;A6PVN5;Q15257-3;F6WIT2;Q15257-4;Q5T949;Q5T948;A6PVN9;Q68CR8;A6PVN6;A6PVN8;B7ZBQ0;A6PVN7;C9IZ76;H0Y6E5;B7ZBP9;B7ZBP7;B4DDQ6;H0Y562	Q15257-2;Q15257;A6PVN5;Q15257-3;F6WIT2;Q15257-4;Q5T949;Q5T948;A6PVN9	Serine/threonine-protein phosphatase 2A activator	PPP2R4	130.59	1795200000	107	27.3036	27.5811	27.5393	27.4364	27.6665	27.4495
	0.496064	-0.33582	Q15274;C9JCJ5;H3BP73	Q15274;C9JCJ5	Nicotinate-nucleotide pyrophosphorylase [carboxylating]	QPRT	59.202	3012600000	103	28.8087	28.1195	28.4255	27.867	27.9294	28.5499
	0.366281	-0.059405	Q15276;Q15276-2;K7ENJ9	Q15276;Q15276-2	Rab GTPase-binding effector protein 1	RABEP1	92.418	503330000	54	25.576	25.725	25.6036	25.67	25.5565	25.4999
	1.1376	0.397148	Q15293;Q15293-2;E9PP27	Q15293;Q15293-2	Reticulocalbin-1	RCN1	261.1	11739000000	181	29.8664	29.9712	30.0659	30.4432	30.0683	30.5833
	0.820857	0.513236	Q15363;F5GX39;E7EQ72	Q15363;F5GX39;E7EQ72	Transmembrane emp24 domain-containing protein 2	TMED2	65.042	4436900000	80	28.5396	28.4579	28.5667	29.0587	28.5246	29.5206
	1.42918	-0.364558	Q15365;C9K0A2;F8WC71;C9IZV9;C9J7A9;C9JSA6;C9J5V4	Q15365	Poly(rC)-binding protein 1	PCBP1	323.31	13426000000	299	30.4198	30.4604	30.5478	30.202	30.2446	29.8878
	0.340129	0.173393	Q15370;Q15370-2;A0A0B4J296;B8ZZU8;I3L0M9	Q15370;Q15370-2;A0A0B4J296;B8ZZU8;I3L0M9	Transcription elongation factor B polypeptide 2	TCEB2	45.304	2738700000	68	28.1765	27.8262	28.1272	28.3371	27.8624	28.4506
	0.204291	-0.123002	Q15382;C9J931;F8WBL3	Q15382;C9J931	GTP-binding protein Rheb	RHEB	6.6162	444450000	29	25.2083	25.3639	25.4701	25.4896	25.3953	24.7884
	0.144941	-0.301299	Q15388	Q15388	Mitochondrial import receptor subunit TOM20 homolog	TOMM20	13.733	378350000	16	25.5059	25.6664	24.6861	25.8002	23.5706	25.5837
	0.635467	-0.197261	Q15393;Q15393-3;Q15393-2;I3L4G7;H3BMB0;J3QRB2;J3QL37;J3QKV4	Q15393	Splicing factor 3B subunit 3	SF3B3	213.34	5915600000	339	29.1034	29.5521	29.2686	29.0157	29.1805	29.1361
	0.774161	-0.392191	Q15404;Q15404-2	Q15404;Q15404-2	Ras suppressor protein 1	RSU1	83.339	668220000	52	26.6217	26.1743	25.9652	25.6024	25.9667	26.0155
	0.290742	-0.0721957	Q15417;Q15417-2;Q15417-3;E9PDU6	Q15417;Q15417-2;Q15417-3;E9PDU6	Calponin-3;Calponin	CNN3	258.97	7935100000	206	29.4984	29.5426	29.7898	29.6165	29.4675	29.5301
	0.257225	0.202008	Q15424;Q15424-4;Q15424-3;Q15424-2;K7ES42	Q15424;Q15424-4;Q15424-3;Q15424-2	Scaffold attachment factor B1	SAFB	136.67	1149400000	108	26.1259	26.9234	26.8937	27.0335	26.5068	27.0087
	0.221977	0.138679	Q15427;Q5SZ64	Q15427;Q5SZ64	Splicing factor 3B subunit 4	SF3B4	169.04	1183500000	68	26.3918	27.182	26.6765	26.8029	26.8196	27.0438
	0.205555	-0.132505	Q15428;K7EMT0	Q15428	Splicing factor 3A subunit 2	SF3A2	61.234	1020500000	61	26.3658	27.0668	26.6867	26.447	26.863	26.4118
	0.087302	-0.0708307	Q15435;Q15435-2;C9JD73;C9J177;H7C003;Q15435-3;Q15435-5;Q15435-4;B5MBZ8;C9JRC4;H7C118;H7C3Q5	Q15435;Q15435-2;C9JD73;C9J177;H7C003;Q15435-3;Q15435-5;Q15435-4;B5MBZ8	Protein phosphatase 1 regulatory subunit 7	PPP1R7	93.442	1626200000	128	27.7321	27.5525	26.8104	27.2253	27.4105	27.2467
	0.384158	-0.159053	Q15436;F5H365;Q15436-2;G3V3G5;G3V2R6;G3V4V1;G3V1W4;G3V5X8;G3V4Q2;G3V5K1	Q15436;F5H365;Q15436-2	Protein transport protein Sec23A	SEC23A	302.12	4692700000	198	29.1952	28.6811	28.8896	28.8574	28.848	28.5833
	0.280027	-0.121218	Q15459;Q15459-2;H7C1L2;F8WB66;F8WC79	Q15459;Q15459-2	Splicing factor 3A subunit 1	SF3A1	323.31	3716900000	247	28.3372	28.6387	28.7551	28.6993	28.3344	28.3336
	0.999072	-0.794153	Q15477;H7C5N0;H7C4L3	Q15477	Helicase SKI2W	SKIV2L	19.723	215410000	43	24.9467	24.8817	24.564	23.8626	24.6739	23.4735
	1.51512	1.29597	Q15555;Q15555-5;Q15555-3;Q15555-4;Q15555-2;K7ERD8;K7EL66;M0QX52;K7ENB3	Q15555;Q15555-5;Q15555-3;Q15555-4;Q15555-2;K7ERD8	Microtubule-associated protein RP/EB family member 2	MAPRE2	65.576	1243200000	86	25.4774	26.5051	26.3677	27.4457	27.0004	27.792
	0.0488929	-0.0599689	Q15582;H0Y8L3;S4R3C6;H0Y9D7;H0YAB8;H0Y8M8	Q15582;H0Y8L3	Transforming growth factor-beta-induced protein ig-h3	TGFBI	158.09	1053500000	93	27.2362	26.3257	26.5888	26.0633	26.7369	27.1705
	0.457332	-0.281806	Q15631;E9PGT1;H7C1D4;Q15631-2;A0A0J9YVW2	Q15631;E9PGT1;H7C1D4	Translin	TSN	135.84	3648200000	135	28.8311	28.5898	28.7546	28.9345	28.3238	28.0718
	0.279946	0.0861835	Q15637-4;Q15637-6;Q15637-3;Q15637-2;Q15637;Q15637-5;Q15637-7;F8WEV5;C9J792;H7C561	Q15637-4;Q15637-6;Q15637-3;Q15637-2;Q15637;Q15637-5;Q15637-7	Splicing factor 1	SF1	67.811	2282700000	135	27.7353	28.0655	27.7569	27.83	27.9382	28.048
	0.615583	0.654763	Q15642-2;Q15642;W4VSQ9;Q15642-4;Q15642-3;M0R2H7;M0R0F9;Q15642-5;M0R070	Q15642-2;Q15642;W4VSQ9;Q15642-4;Q15642-3;M0R2H7;M0R0F9;Q15642-5	Cdc42-interacting protein 4	TRIP10	36.204	187160000	43	24.0496	23.0522	24.5736	24.4784	24.2914	24.8698
	2.68851	0.885171	Q15691	Q15691	Microtubule-associated protein RP/EB family member 1	MAPRE1	283.44	11175000000	237	29.6059	29.4824	29.4402	30.513	30.1671	30.5039
	0.512756	0.839124	Q15714;Q15714-4;A0A087X0H8;C9IZ15;Q15714-3	Q15714;Q15714-4	TSC22 domain family protein 1	TSC22D1	15.744	372620000	33	23.3353	24.7923	25.2673	26.1151	24.7057	25.0915
	0.408276	0.321231	Q15717;Q15717-2;M0QZR9;M0R055	Q15717;Q15717-2	ELAV-like protein 1	ELAVL1	123.37	6412400000	203	28.6713	29.2437	29.3877	29.7029	28.9186	29.6449
	0.232659	-0.0730178	Q15738;C9JDR0	Q15738;C9JDR0	Sterol-4-alpha-carboxylate 3-dehydrogenase, decarboxylating	NSDHL	70.1	1639300000	103	27.4754	27.3028	27.4035	27.5199	27.3124	27.1303
	1.19986	-1.01908	Q15750-2;Q15750	Q15750-2;Q15750	TGF-beta-activated kinase 1 and MAP3K7-binding protein 1	TAB1	24.433	126910000	33	23.9513	24.4129	23.9997	23.8344	22.8439	22.6283
	0.614073	0.503942	Q15758;M0QXM4;Q15758-3;Q15758-2;M0QX44	Q15758;M0QXM4;Q15758-3;Q15758-2	Neutral amino acid transporter B(0);Amino acid transporter	SLC1A5	50.505	419030000	50	25.5487	24.3396	25.2702	25.4997	25.5229	25.6476
	1.40405	0.802014	Q15768	Q15768	Ephrin-B3	EFNB3	33.184	650800000	49	25.6685	24.9962	25.8133	26.403	26.3576	26.1235
	0.22442	-0.120912	Q15813;A0A2R8YHI9;A0A2R8Y5Q8;Q15813-2;A0A2U3TZJ6;A0A2R8Y7E7;A0A2R8YFL4;A0A2R8Y6Q1;A0A2R8Y4V6;A0A2R8YER9;A0A2R8Y809;A0A2R8Y784;A0A2R8Y897;A0A2R8Y5H6;A0A2R8Y787;A0A2R8Y4P2;A0A2R8YFM3;A0A2R8Y6L2;A0A2R8Y6G3;A0A2R8YF12;A0A2R8Y7H8;A0A2R8YH53;A0A2R8Y597;A0A2R8Y4E7;A0A2R8Y3S1;A0A2R8YFG9	Q15813;A0A2R8YHI9;A0A2R8Y5Q8;Q15813-2;A0A2U3TZJ6;A0A2R8Y7E7;A0A2R8YFL4;A0A2R8Y6Q1	Tubulin-specific chaperone E	TBCE	44.657	696490000	86	26.0585	26.0074	26.4431	25.888	26.3675	25.8908
	1.17547	0.423699	Q15819;G3V113;H0YBX6;H0YBP9	Q15819;G3V113;H0YBX6;H0YBP9	Ubiquitin-conjugating enzyme E2 variant 2	UBE2V2	79.429	5816400000	107	28.8011	28.8779	28.995	29.2716	29.0625	29.611
	0.0445768	0.0504964	Q15904;A6QRJ1;A0A0C4DGX8;A6NLC6;H7C2Y8;H7C0T7;F2Z3L8	Q15904;A6QRJ1	V-type proton ATPase subunit S1	ATP6AP1	19.114	158000000	39	23.9779	23.4873	24.0622	23.2676	24.4492	23.9622
	1.74802	0.351221	Q15907;Q15907-2;P62491-2;P62491;H3BMH2;H3BSC1;B4DQU5;M0R2D0;M0R377;H3BN38	Q15907;Q15907-2;P62491-2;P62491;H3BMH2;H3BSC1	Ras-related protein Rab-11B;Ras-related protein Rab-11A	RAB11B;RAB11A	69.177	9104100000	150	29.6628	29.4383	29.5073	29.9863	29.7743	29.9014
	0.55131	0.289437	Q15942;H0Y2Y8;Q15942-2;H7C3D3;C9IZ41;H7C3R3;C9JJK5	Q15942;H0Y2Y8;Q15942-2	Zyxin	ZYX	123.35	1090500000	81	26.6726	26.4667	26.7618	27.1109	26.4935	27.165
	0.404586	0.649503	Q16143;G4Y816	Q16143	Beta-synuclein	SNCB	24.486	157330000	11	23.9453	22.7292	22.7295	24.853	23.0506	23.4488
	0.589694	-0.176807	Q16181;E7ES33;E7EPK1;Q16181-2;G3V1Q4;A0A0U1RRD1;A0A0U1RRM2;Q5JXL7;Q6ZU15	Q16181;E7ES33;E7EPK1;Q16181-2;G3V1Q4	Septin-7	2007-09-01	256.08	9862700000	247	29.7812	29.881	29.9211	29.4434	29.8761	29.7334
	0.146902	0.062891	Q16186;A0A087WX59;A0A087WUX6	Q16186;A0A087WX59	Proteasomal ubiquitin receptor ADRM1	ADRM1	19.048	481530000	57	25.7146	25.7328	25.3045	25.5018	25.7596	25.6792
	0.16344	-0.310547	Q16222-3;Q16222;Q16222-2;Q3KQV9;A0A087X226	Q16222-3;Q16222;Q16222-2	UDP-N-acetylhexosamine pyrophosphorylase;UDP-N-acetylgalactosamine pyrophosphorylase;UDP-N-acetylglucosamine pyrophosphorylase	UAP1	34.528	168910000	35	25.58	23.8176	23.2869	23.7087	24.2655	23.7787
	1.70409	-0.744603	Q16401-2;Q16401;F2Z3J2;Q4VXH0	Q16401-2;Q16401	26S proteasome non-ATPase regulatory subunit 5	PSMD5	125.48	1213500000	102	27.3157	27.0942	27.2688	26.1569	26.8018	26.4862
	0.315641	-0.238653	Q16527;F8VQR7;F8VW96	Q16527;F8VQR7;F8VW96	Cysteine and glycine-rich protein 2	CSRP2	23.679	945910000	52	26.812	26.4404	26.6991	26.7764	25.8409	26.6182
	0.920651	0.238039	Q16531;F5GY55;Q16531-2;F5H2L3;F5GWI0;F5GZY8;F5H198;F5GYG8	Q16531;F5GY55	DNA damage-binding protein 1	DDB1	167.73	6377900000	332	29.1644	29.2279	29.0391	29.5486	29.1815	29.4154
	0.265215	0.122004	Q16537-2;Q16537;Q16537-3	Q16537-2;Q16537;Q16537-3	Serine/threonine-protein phosphatase 2A 56 kDa regulatory subunit epsilon isoform	PPP2R5E	33.92	492760000	62	25.555	25.4019	25.3471	25.6909	25.7655	25.2136
	0.836652	-0.1528	Q16543;K7EQA9;K7EKQ2;K7EL68;K7EIU0;K7EJ06	Q16543;K7EQA9;K7EKQ2;K7EL68	Hsp90 co-chaperone Cdc37;Hsp90 co-chaperone Cdc37, N-terminally processed	CDC37	39.045	1523200000	59	27.3931	27.3193	27.3151	27.0284	27.2806	27.2601
	1.0543	0.334208	Q16643;Q16643-2;Q16643-3;D6R9W4;D6R9Q9;D6RFI1;D6RCR4	Q16643;Q16643-2;Q16643-3;D6R9W4	Drebrin	DBN1	288.34	7486200000	245	29.2052	29.3522	29.3663	29.804	29.3639	29.7585
	0.82633	-2.09188	Q16647	Q16647	Prostacyclin synthase	PTGIS	38.071	692390000	51	27.1834	26.0548	26.5598	22.2646	25.8219	25.4358
	0.126851	-0.0429255	Q16658;C9JFC0;A0A0A0MSB2;C9JPH9	Q16658	Fascin	FSCN1	323.31	22865000000	451	31.344	30.9975	31.1277	31.234	31.1212	30.9852
	0.00141258	-0.00130526	Q16698-2;Q16698;E5RFV2;E5RJG7;E5RJD2;E5RID6;H0YAW3	Q16698-2;Q16698;E5RFV2;E5RJG7	2,4-dienoyl-CoA reductase, mitochondrial	DECR1	99.682	3352400000	116	28.4045	28.2065	28.3258	28.6102	28.6035	27.7191
	0.0589561	0.0378259	Q16718;A0A087X1G1;H7BYD0;Q16718-2;F8WAS3;A0A087WXR5;C9IZN5	Q16718;A0A087X1G1;H7BYD0;Q16718-2;F8WAS3	NADH dehydrogenase [ubiquinone] 1 alpha subcomplex subunit 5	NDUFA5	35.298	632670000	57	25.4514	26.0155	26.0766	25.7376	25.8465	26.0729
	0.0594046	-0.146397	Q16740;M0R208;A0A2R8YEF5;M0QYV5	Q16740;M0R208	ATP-dependent Clp protease proteolytic subunit, mitochondrial;ATP-dependent Clp protease proteolytic subunit	CLPP	13.242	271290000	36	24.504	24.5529	25.0269	22.8743	25.3508	25.4195
	0.583393	-0.768403	Q16762;B1AH48	Q16762	Thiosulfate sulfurtransferase	TST	12.665	327450000	26	25.4086	25.2745	25.2986	25.2327	25.0523	23.3914
	1.22164	0.818714	Q16775-2;H3BPK3;H3BPQ4;Q16775;H3BQW8;H3BV79;Q16775-3	Q16775-2;H3BPK3;H3BPQ4;Q16775	Hydroxyacylglutathione hydrolase, mitochondrial	HAGH	51.035	1132000000	105	26.0473	26.2647	26.4208	27.1119	26.5282	27.5489
	0.497809	-0.159177	Q16795;A0A3B3ISG8;F5H0J3;F5GY40	Q16795;A0A3B3ISG8	NADH dehydrogenase [ubiquinone] 1 alpha subcomplex subunit 9, mitochondrial	NDUFA9	48.532	786570000	58	26.1382	26.3001	26.4833	26.088	26.0169	26.3391
	1.68957	1.1759	Q16799;Q2NKQ5;Q16799-2;A8MT72	Q16799;Q2NKQ5	Reticulon-1;Reticulon	RTN1	93.978	2926000000	121	26.6697	27.3289	27.5456	28.5177	28.0088	28.5454
	0.849437	1.28459	Q16799-3	Q16799-3	Reticulon-1	RTN1	5.8467	320040000	11	23.4942	23.1508	22.9849	23.1775	25.4875	24.8186
	0.605245	-0.701785	Q16822;H0YML5;Q16822-3;H0YM31;A0A0A0MS74;Q16822-2;H0YMU6;H0YMY3;H0YNG4;H0YMA5;P35558-2;P35558	Q16822;H0YML5;Q16822-3;H0YM31	Phosphoenolpyruvate carboxykinase [GTP], mitochondrial	PCK2	23.086	475080000	48	26.794	25.3773	25.7008	25.0423	25.8362	24.8882
	0.532804	-0.206267	Q16836;A0A0D9SFP2;E9PF18;Q16836-3;Q16836-2;A0A0A0MSE2;A0A1W2PNM1;A0A1W2PQV5;A0A1W2PQC2;A0A1W2PQ78;A0A1W2PRT2;A0A1W2PP40;A0A1W2PQ55	Q16836;A0A0D9SFP2;E9PF18;Q16836-3;Q16836-2;A0A0A0MSE2;A0A1W2PNM1;A0A1W2PQV5;A0A1W2PQC2;A0A1W2PQ78;A0A1W2PRT2	Hydroxyacyl-coenzyme A dehydrogenase, mitochondrial	HADH	257.08	4516500000	178	29.0589	28.8847	28.8049	28.4034	28.8638	28.8624
	2.32416	0.31989	Q16864;Q16864-2	Q16864;Q16864-2	V-type proton ATPase subunit F	ATP6V1F	49.282	391290000	37	25.0613	25.2335	25.1901	25.4536	25.5256	25.4654
	0.475341	0.351932	Q1KMD3;H3BQZ7	Q1KMD3;H3BQZ7	Heterogeneous nuclear ribonucleoprotein U-like protein 2	HNRNPUL2;HNRNPUL2-BSCL2	92.944	4331100000	187	27.973	28.8617	28.613	29.0953	28.4845	28.9235
	0.613049	-0.686445	Q27J81-2;Q27J81;A0A0A0MQU1;Q27J81-3	Q27J81-2;Q27J81;A0A0A0MQU1	Inverted formin-2	INF2	91.953	122120000	37	24.9819	24.5345	24.1512	23.5721	24.7383	23.2979
	1.07074	-1.02123	Q29RF7;Q29RF7-3;H0Y9L6;H0Y9L9;H0Y9X6	Q29RF7	Sister chromatid cohesion protein PDS5 homolog A	PDS5A	93.376	409140000	92	24.8275	26.1902	25.71	24.3418	24.963	24.3592
	0.806146	0.537786	Q2M2I8-2;Q2M2I8;E9PG46	Q2M2I8-2;Q2M2I8;E9PG46	AP2-associated protein kinase 1	AAK1	69.234	85319000	20	22.8649	23.002	22.4512	22.9486	23.8156	23.1672
	0.673448	-1.0759	Q2TAL8	Q2TAL8	Glutamine-rich protein 1	QRICH1	43.788	273340000	41	25.395	25.1204	24.9092	24.5388	24.9912	22.6668
	0.849081	-0.354282	Q2TAY7;Q2TAY7-2	Q2TAY7;Q2TAY7-2	WD40 repeat-containing protein SMU1;WD40 repeat-containing protein SMU1, N-terminally processed	SMU1	80.372	1089100000	116	26.7277	26.9857	26.9485	26.8586	26.4872	26.2531
	0.394109	0.272242	Q32MZ4-3;Q32MZ4-2;Q32MZ4	Q32MZ4-3;Q32MZ4-2;Q32MZ4	Leucine-rich repeat flightless-interacting protein 1	LRRFIP1	40.517	316520000	45	24.7135	24.8629	24.6099	25.4052	24.4575	25.1404
	0.0235305	-0.0147851	Q32P28;Q32P28-4;Q32P28-3;Q32P28-2;E2QRI1;H7C2W6	Q32P28;Q32P28-4;Q32P28-3	Prolyl 3-hydroxylase 1	LEPRE1	71.257	1198800000	116	27.1412	26.4982	26.9742	26.8067	26.7428	27.0198
	0.760456	0.531796	Q3KQU3-4;Q3KQU3;Q3KQU3-2;Q3KQU3-3;C9JIR3;H0YF21;E9PLH3	Q3KQU3-4;Q3KQU3;Q3KQU3-2	MAP7 domain-containing protein 1	MAP7D1	80.18	565880000	114	25.0726	25.715	25.6627	25.9812	25.6053	26.4591
	0.214538	-0.18818	Q3LXA3;H0YCY6;Q3LXA3-2;I3L252;E9PJG8	Q3LXA3;H0YCY6;Q3LXA3-2	Bifunctional ATP-dependent dihydroxyacetone kinase/FAD-AMP lyase (cyclizing);ATP-dependent dihydroxyacetone kinase;FAD-AMP lyase (cyclizing)	DAK;TKFC	56.451	713860000	105	26.0149	26.4413	25.9906	25.6595	26.5761	25.6465
	1.3408	1.00287	Q3SXM5;Q3SXM5-2;H3BQI7;H3BT52;H3BNH5	Q3SXM5;Q3SXM5-2	Inactive hydroxysteroid dehydrogenase-like protein 1	HSDL1	104.17	1824800000	87	26.1788	26.8709	27.0412	27.9843	27.2448	27.8704
[truncated: 781 more rows]

## Sheet: Y366Lfs vs CTRL
Significant	Significance	Fold change	Protein IDs	Majority protein IDs	Protein names	Gene names	Score	Intensity	MS/MS count	CTRL_1	CTRL_2	CTRL_3	Y366Lfs_1	Y366Lfs_2	Y366Lfs_3
[truncated: 2,638 more rows]

[truncated: 1 more sheets: E370K vs Y366Lfs]
