# Supplementary material for: Extracellular LGALS3BP regulates neural progenitor position and relates to human cortical complexity
Source: Nat Commun. 2021 Nov 2;12:6298. doi: 10.1038/s41467-021-26447-w (PMC8564519; doi:10.1038/s41467-021-26447-w)
Supplement: Supplementary file 7 — Supplementary Data 3. [file 41467_2021_26447_MOESM7_ESM.xlsx]

## Sheet: Key
Secretome mass spectrometry-based proteomics.
Decreasing abundance of the protein:
Increasing abundance of the protein:

## Sheet: E370K vs CTRL
Significance	Difference	Protein IDs	Majority protein IDs	Protein names	Gene names	Score	Intensity	MS/MS count	CTRL1	CTRL2	CTRL3	E370K_1	E370K_2	E370K_3
0.348477	0.0817184	P01023;H0YFH1;P20742-2;P20742	P01023	Alpha-2-macroglobulin	A2M	165.04	170520000	60	24.7705	24.5231	24.5564	24.7736	24.739	24.5825
1.19365	1.42658	P49588;P49588-2;H3BPK7	P49588;P49588-2;H3BPK7	Alanine--tRNA ligase, cytoplasmic	AARS	2.4912	11090000	3	21.0444	21.5103	21.3255	21.64	23.1298	23.3902
0.328265	0.336693	Q9BWD1;Q9BWD1-2	Q9BWD1;Q9BWD1-2	Acetyl-CoA acetyltransferase, cytosolic	ACAT2	33.123	84682000	31	22.3547	23.5795	23.5273	23.7197	23.4989	23.2529
0.0195719	-0.0726884	G5E9R5;P24666-4;P24666;F2Z2Q9;D3YTI2;P24666-3;P24666-2	G5E9R5;P24666-4;P24666;F2Z2Q9;D3YTI2;P24666-3;P24666-2	Low molecular weight phosphotyrosine protein phosphatase	ACP1	4.5674	6224500	8	22.2372	20.386	22.9567	23.4382	21.8462	20.0774
0.255616	1.4314	P68133;P68032;P63267;P62736;A6NL76;F8WB63;B8ZZJ2;C9JFL5;F6UVQ4;F6QUT6	P68133;P68032;P63267;P62736;A6NL76	Actin, alpha skeletal muscle;Actin, alpha cardiac muscle 1;Actin, gamma-enteric smooth muscle;Actin, aortic smooth muscle	ACTA1;ACTC1;ACTG2;ACTA2	18.088	756190000	14	20.905	22.8752	26.9282	25.8237	22.3715	26.8073
0.718939	-0.837228	P60709;A0A2R8Y793;P63267-2;Q6S8J3;A0A2R8YEA7;E7EVS6;A0A2R8YGF8;A5A3E0;G5E9R0;Q562R1;A0A2R8YFE2;C9JUM1;C9JZR7;Q9BYX7;P0CG38;C9JTX5;P0CG39;F8WCH0	P60709;A0A2R8Y793	Actin, cytoplasmic 1;Actin, cytoplasmic 1, N-terminally processed	ACTB	29.696	64633000	10	23.1259	23.9084	22.3878	21.7054	22.6681	22.5368
0.104043	0.0770092	P63261;I3L3I0;I3L1U9;I3L4N8;I3L3R2;K7EM38;J3KT65	P63261;I3L3I0;I3L1U9;I3L4N8	Actin, cytoplasmic 2;Actin, cytoplasmic 2, N-terminally processed	ACTG1	323.31	6375200000	209	29.4559	29.7504	29.5077	29.929	29.8676	29.1485
0.505675	-1.13014	H9KV75;P12814-2;P12814;P12814-3;P12814-4;G3V2W4;G3V2N5;P35609-2;P35609;F6THM6;G3V2E8;G3V5M4;G3V2X9;A0A087WSZ2;Q08043	H9KV75;P12814-2;P12814;P12814-3;P12814-4;G3V2W4	Alpha-actinin-1	ACTN1	2.5941	2539800	1	22.7355	21.5687	23.9037	20.5449	21.3232	22.9495
0.427574	0.332769	O43707;O43707-2;F5GXS2;O43707-3;H7C144;K7EJH8;H0YJ11;H0YJW3;H7C5W8;K7EP19;M0QZQ3;C9JY79;Q9H254-2;Q9H254-4;Q9H254	O43707;O43707-2	Alpha-actinin-4	ACTN4	56.941	203660000	57	24.1053	24.5014	24.4835	25.0703	24.9294	24.0887
0.212337	-0.473909	B4DXW1;P61158;F8WDR7;A0A0A0MTI9;H7C4J1;C9IZN3;Q9C0K3;Q9P1U1-2;Q9P1U1-3;Q9P1U1	B4DXW1;P61158;F8WDR7;A0A0A0MTI9;H7C4J1;C9IZN3;Q9C0K3;Q9P1U1-2;Q9P1U1-3;Q9P1U1	Actin-related protein 3;Actin-related protein 3C;Actin-related protein 3B	ACTR3;ACTR3C;ACTR3B	3.3983	13444000	2	22.0001	22.5655	22.5779	21.4152	20.7537	23.5529
0.473012	-1.40488	G3V3F8;G3V597;P07311-2;P07311	G3V3F8;G3V597;P07311-2;P07311	Acylphosphatase-1	ACYP1	4.4187	3859200	6	21.94	23.7813	21.8937	22.4391	22.0727	18.8886
0.106724	-0.172661	C9J6H5;C9JPM3;F8WC54;A0AVL1;Q13443-2;Q13443	C9J6H5;C9JPM3;F8WC54;A0AVL1;Q13443-2;Q13443	Disintegrin and metalloproteinase domain-containing protein 9	ADAM9	4.4522	30634000	6	23.6656	21.6943	22.4652	22.6404	22.3963	22.2704
0.316227	0.368894	Q9UHI8	Q9UHI8	A disintegrin and metalloproteinase with thrombospondin motifs 1	ADAMTS1	31.056	27083000	5	22.0127	23.2495	22.1368	23.3001	22.8433	22.3624
0.112182	-0.175552	Q8IUX7-2;Q8IUX7	Q8IUX7-2;Q8IUX7	Adipocyte enhancer-binding protein 1	AEBP1	9.1468	9622800	8	23.3364	21.4931	22.1029	22.4554	21.8965	22.0539
2.30652	0.963144	J3KMX3;P02771;CON__Q3SZ57	J3KMX3;P02771	Alpha-fetoprotein	AFP	323.31	25597000000	376	31.1609	31.2363	31.5506	32.4342	32.367	32.0359
0.253044	0.248154	O00468-6;O00468-3;O00468-5;O00468-4;O00468-7;O00468;A0A087X208;O00468-2;H0Y5U1	O00468-6;O00468-3;O00468-5;O00468-4;O00468-7;O00468;A0A087X208;O00468-2	Agrin;Agrin N-terminal 110 kDa subunit;Agrin C-terminal 110 kDa subunit;Agrin C-terminal 90 kDa fragment;Agrin C-terminal 22 kDa fragment	AGRN	27.614	43490000	19	22.0694	23.0183	22.834	23.3184	22.9246	22.4233
0.36365	0.382329	P23526-2;P23526	P23526-2;P23526	Adenosylhomocysteinase	AHCY	48.654	195330000	31	23.7633	24.9016	24.7164	25.3242	24.4259	24.7782
1.9626	1.63536	Q09666	Q09666	Neuroblast differentiation-associated protein AHNAK	AHNAK	4.7624	73744000	11	23.1053	22.0472	22.029	24.1332	23.8771	24.0772
2.06211	1.34707	C9JV77;P02765	C9JV77;P02765	Alpha-2-HS-glycoprotein;Alpha-2-HS-glycoprotein chain A;Alpha-2-HS-glycoprotein chain B	AHSG	18.664	212770000	18	23.5255	24.2398	24.3073	25.1883	25.3085	25.6171
0.0238557	0.104706	H0YID2;Q5T9B7;P00568	H0YID2;Q5T9B7;P00568	Adenylate kinase isoenzyme 1	AK1	2.2382	4179400	1	21.0879	22.578	20.8176	21.315	24.0873	19.3955
0.497219	-0.565968	P14550;V9GYG2;V9GYP9;Q5T621	P14550;V9GYG2;V9GYP9;Q5T621	Alcohol dehydrogenase [NADP(+)]	AKR1A1	2.6103	21591000	2	22.8607	22.8907	21.909	21.527	21.6983	22.7372
0.579743	-0.906399	E9PCX2;P15121	E9PCX2;P15121	Aldose reductase	AKR1B1	4.6357	26665000	6	22.4053	23.0641	24.1073	21.3343	22.5595	22.9638
0.519785	0.495139	P04075;P04075-2;J3KPS3;H3BQN4;H3BPS8;H3BR68;H3BUH7;H3BR04;H3BU78;H3BMQ8;A0A087WXX2;A0A3B3IS80;P05062	P04075;P04075-2;J3KPS3;H3BQN4;H3BPS8	Fructose-bisphosphate aldolase A;Fructose-bisphosphate aldolase	ALDOA	156.21	753780000	104	25.5486	26.8796	26.0375	26.5446	26.9552	26.4514
0.0175677	0.0314299	P09972;A8MVZ9;K7EKH5;J3KSV6;J3QKP5;C9J8F3	P09972;A8MVZ9	Fructose-bisphosphate aldolase C;Fructose-bisphosphate aldolase	ALDOC	14.415	8379400	7	22.0819	23.3346	21.9664	23.1714	21.7815	22.5243
0.102494	0.130341	E9PB61;Q86V81	E9PB61;Q86V81	THO complex subunit 4	ALYREF	2.0472	30185000	5	22.0763	21.4782	22.2389	21.7933	22.8382	21.553
0.4768	0.727607	H0YN26;P39687;H7BZ09;O95626;O43423	H0YN26;P39687	Acidic leucine-rich nuclear phosphoprotein 32 family member A	ANP32A	18.989	206610000	14	22.937	24.9243	24.7829	25.05	25.1671	24.6099
0.295927	0.294358	Q92688-2;Q92688	Q92688-2;Q92688	Acidic leucine-rich nuclear phosphoprotein 32 family member B	ANP32B	3.9594	14558000	4	22.768	21.853	21.7187	22.8722	22.1814	22.1692
0.61348	-0.433579	P04083;Q5T3N1;Q5T3N0	P04083;Q5T3N1;Q5T3N0	Annexin A1;Annexin	ANXA1	43.501	94113000	19	22.7579	23.6332	23.2394	22.8922	22.403	23.0346
0.672863	-0.112142	P07355;P07355-2;H0YN42;H0YKS4;H0YMD0;H0YMU9;A6NMY6;H0YMM1;H0YM50;H0YKZ7;H0YLV6;H0YMT9;H0YKX9;H0YMW4;H0YKL9;H0YNP5;H0YKV8;H0YN28;H0YL33;H0YN52;H0YMD9;H0YNA0;H0YLE2;H0YNB8;H0YKN4	P07355;P07355-2;H0YN42;H0YKS4;H0YMD0;H0YMU9;A6NMY6;H0YMM1;H0YM50;H0YKZ7;H0YLV6;H0YMT9;H0YKX9;H0YMW4	Annexin A2;Annexin;Putative annexin A2-like protein	ANXA2;ANXA2P2	91.478	630850000	58	26.7108	26.465	26.5307	26.4927	26.4391	26.4382
1.11926	-0.827649	P08758;D6RBE9;D6RBL5;E9PHT9	P08758;D6RBE9;D6RBL5	Annexin A5;Annexin	ANXA5	96.336	145450000	23	24.3584	25.0005	24.3052	23.786	24.1563	23.2388
0.941556	-0.713338	E5RK69;P08133-2;P08133;E7EMC6;H0YC77;E5RFF0	E5RK69;P08133-2;P08133;E7EMC6	Annexin;Annexin A6	ANXA6	8.1498	30271000	12	22.1617	22.7024	22.9764	22.353	21.4478	21.8998
0.787342	0.634185	F5GZ08;B7Z4G8;P51693;P51693-2;S4R3U6;K7EQJ4;K7ELK0;K7EMN4	F5GZ08;B7Z4G8;P51693;P51693-2;S4R3U6;K7EQJ4	Amyloid-like protein 1;C30	APLP1	50.069	55760000	18	23.2034	23.3756	22.2495	23.7684	23.6194	23.3431
0.519762	0.631315	P02647;F8W696	P02647;F8W696	Apolipoprotein A-I;Proapolipoprotein A-I;Truncated apolipoprotein A-I	APOA1	323.31	3849100000	105	28.3636	28.3084	29.9294	29.4715	29.5895	29.4343
0.202343	0.302741	Q8NCW5-2;Q8NCW5;Q5T3I4;Q5T3I3	Q8NCW5-2;Q8NCW5;Q5T3I4;Q5T3I3	NAD(P)H-hydrate epimerase	APOA1BP	2.4768	3862800	4	21.7991	21.1434	23.0156	21.9469	22.3659	22.5536
0.0630171	0.176383	V9GYM3;P02652;V9GYE3;V9GYG9;V9GYC1;V9GYS1	V9GYM3;P02652;V9GYE3;V9GYG9	Apolipoprotein A-II;Proapolipoprotein A-II;Truncated apolipoprotein A-II	APOA2	113.6	34404000	11	21.4699	23.5715	22.4529	22.4169	21.5059	24.1007
0.991977	1.26448	P06727;CON__Q32PJ2	P06727	Apolipoprotein A-IV	APOA4	29.063	185810000	26	23.7254	23.3347	25.1112	24.8499	25.7405	25.3742
0.140607	-0.301633	P04114;A8MUN2	P04114	Apolipoprotein B-100;Apolipoprotein B-48	APOB	38.422	9635200	9	22.5109	23.7443	21.834	21.3593	23.3002	22.5249
0.394025	-0.658154	B0YIW2;P02656	B0YIW2;P02656	Apolipoprotein C-III	APOC3	127.45	11982000	5	22.7114	22.2523	23.495	23.2032	22.1733	21.1077
0.377036	1.21232	P02649;E9PEV4;E7ERP7;H0Y7L5;CON__Q03247	P02649;E9PEV4;E7ERP7;H0Y7L5	Apolipoprotein E	APOE	193.47	265280000	22	21.9678	24.701	26.4984	25.9561	25.8276	25.0205
1.71769	0.687565	P05067-11;P05067-8;P05067;P05067-7;P05067-9;E9PG40;H7C0V9	P05067-11;P05067-8;P05067;P05067-7;P05067-9;E9PG40;H7C0V9	Amyloid beta A4 protein;N-APP;Soluble APP-alpha;Soluble APP-beta;C99;Beta-amyloid protein 42;Beta-amyloid protein 40;C83;P3(42);P3(40);C80;Gamma-secretase C-terminal fragment 59;Gamma-secretase C-terminal fragment 57;Gamma-secretase C-terminal fragment 50;C31	APP	151.01	1198500000	146	26.5715	27.1361	26.8214	27.6237	27.5928	27.3753
0.221833	0.641814	F5H423;P84077;P61204;F5H0C7;P61204-2	F5H423;P84077;P61204;F5H0C7;P61204-2	ADP-ribosylation factor 1;ADP-ribosylation factor 3	ARF1;ARF3	22.267	50697000	13	20.5286	21.6623	23.7606	23.7818	21.6861	22.4091
1.04103	-0.755243	J3KRE2;J3KTF8;J3QQX2;P52565	J3KRE2;J3KTF8;J3QQX2;P52565	Rho GDP-dissociation inhibitor 1	ARHGDIA	3.5863	21652000	5	22.7541	22.4314	23.2763	21.7255	22.5181	21.9525
1.16308	-1.15137	P25705-2;P25705;P25705-3;K7EK77;K7EJP1;K7ERX7;K7EQH4;K7ENJ4	P25705-2;P25705;P25705-3;K7EK77;K7EJP1;K7ERX7	ATP synthase subunit alpha, mitochondrial	ATP5A1	11.656	31001000	13	22.4286	23.9592	23.3516	22.0528	22.3502	21.8823
0.030305	0.0839888	P06576;F8W079;H0YH81;H0YI37;F8W0P7	P06576;F8W079;H0YH81	ATP synthase subunit beta, mitochondrial;ATP synthase subunit beta	ATP5B	59.048	44086000	14	23.0486	23.6337	21.3256	23.9717	21.9023	22.3859
0.230958	0.461773	A6QRJ1;Q15904;H7C2Y8;A6NLC6	A6QRJ1;Q15904;H7C2Y8;A6NLC6	V-type proton ATPase subunit S1	ATP6AP1	8.4508	14659000	9	22.8898	21.9204	21.3277	22.4341	23.6483	21.4408
0.751884	0.370813	B7Z1I9;A0A1B0GVB9;A0A1B0GVW0;A0A1C7CYW4;O75787-2;O75787;A0A1B0GWD6;A0A1B0GVI9;A0A1B0GVC7;A0A1B0GU12;B7Z413;A0A1B0GTU8;A0A1B0GUT7;A0A1B0GWJ8;H7C3E1;A0A1B0GTB0;A0A1B0GUV3;A0A1B0GV24;A0A1B0GW13;A0A1B0GV60	B7Z1I9;A0A1B0GVB9;A0A1B0GVW0;A0A1C7CYW4;O75787-2;O75787;A0A1B0GWD6;A0A1B0GVI9;A0A1B0GVC7;A0A1B0GU12;B7Z413;A0A1B0GTU8;A0A1B0GUT7;A0A1B0GWJ8;H7C3E1;A0A1B0GTB0	Renin receptor	ATP6AP2	9.7996	43502000	23	22.7239	22.4652	22.3837	23.2477	22.5478	22.8897
1.23817	-0.474502	P61769;H0YLF3;F5H6I0	P61769;H0YLF3;F5H6I0	Beta-2-microglobulin;Beta-2-microglobulin form pI 5.3	B2M	193.26	1679800000	67	28.1774	27.7683	28.1165	27.6545	27.6913	27.293
0.138491	-0.161478	P15291-2;P15291	P15291-2;P15291	Beta-1,4-galactosyltransferase 1;Lactose synthase A protein;N-acetyllactosamine synthase;Beta-N-acetylglucosaminylglycopeptide beta-1,4-galactosyltransferase;Beta-N-acetylglucosaminyl-glycolipid beta-1,4-galactosyltransferase;Processed beta-1,4-galactosyltransferase 1	B4GALT1	4.8877	57504000	7	22.8859	22.5399	23.0702	22.4001	22.15	23.4615
0.567032	0.399512	O43505	O43505	Beta-1,4-glucuronyltransferase 1	B4GAT1	18.689	64750000	20	22.4287	22.8929	22.8736	22.6087	23.5352	23.2498
1.51453	1.28631	P80723;P80723-2	P80723;P80723-2	Brain acid soluble protein 1	BASP1	156.55	122840000	46	22.8198	23.4524	22.6007	24.4768	24.6028	23.6522
0.486192	0.56218	P00918;E5RID5;E5RK37	P00918	Carbonic anhydrase 2	CA2	35.425	112720000	16	22.3345	22.9578	21.935	22.3704	23.744	22.7994
0.426872	-0.622437	Q9HB71-3;Q9HB71	Q9HB71-3;Q9HB71	Calcyclin-binding protein	CACYBP	3.2847	9842300	3	22.3762	21.1008	22.7048	20.7688	22.1047	21.441
0.882386	1.04527	F8WBR5;M0QZ52;G3V479;P0DP25;P0DP24;P0DP23;H0Y7A7;E7ETZ0;E7EMB3;P27482;C9J7T9;P02585	F8WBR5;M0QZ52;G3V479;P0DP25;P0DP24;P0DP23;H0Y7A7;E7ETZ0;E7EMB3;P27482	Calmodulin-like protein 3	CALM2;CALM3;CALM1;CALML3	18.125	55287000	14	21.5095	22.9916	21.4832	22.621	23.4401	23.059
0.17632	-0.12257	P27797;K7EJB9;K7EL50	P27797;K7EJB9	Calreticulin	CALR	89.334	285030000	47	24.9959	25.4171	25.0839	24.5983	25.1605	25.3704
0.419728	0.613184	O43852;O43852-3;O43852-2;O43852-4;H0Y875;O43852-15;O43852-10;O43852-6;O43852-9;O43852-5;O43852-13;O43852-14;O43852-11;O43852-12;O43852-7;O43852-8	O43852;O43852-3;O43852-2;O43852-4;H0Y875;O43852-15;O43852-10;O43852-6;O43852-9;O43852-5	Calumenin	CALU	32.991	84312000	22	21.885	23.5711	23.1096	23.6749	23.9748	22.7557
0.838231	1.00066	Q86VP6;Q86VP6-2;A0A0C4DGH5;H0YH27;Q86VP6-3	Q86VP6;Q86VP6-2;A0A0C4DGH5	Cullin-associated NEDD8-dissociated protein 1	CAND1	21.754	113330000	33	23.2474	23.9668	22.3158	24.4496	24.465	23.6174
0.0114891	0.0207138	Q5T0R7;Q5T0R6;Q5T0R5;Q5T0R4;Q5T0R3;Q5T0R2;Q5T0R1;Q01518;Q5T0R9;Q01518-2	Q5T0R7;Q5T0R6;Q5T0R5;Q5T0R4;Q5T0R3;Q5T0R2;Q5T0R1;Q01518;Q5T0R9;Q01518-2	Adenylyl cyclase-associated protein;Adenylyl cyclase-associated protein 1	CAP1	6.6797	27362000	4	21.8136	23.2593	21.4368	22.1575	21.8393	22.5752
0.121012	-0.0992686	P52907	P52907	F-actin-capping protein subunit alpha-1	CAPZA1	11.685	28612000	15	22.1648	22.5761	22.4919	21.7775	22.6659	22.4915
1.64172	1.30318	P47755;C9JUG7;F8W9N7;A0A0D9SET8;P47755-2	P47755;C9JUG7;F8W9N7;A0A0D9SET8;P47755-2	F-actin-capping protein subunit alpha-2	CAPZA2	3.4344	31694000	6	21.926	21.3789	22.2248	22.7382	23.0594	23.6417
0.233554	-0.397634	B1AK85;P47756-2;P47756;B1AK87;B1AK88	B1AK85;P47756-2;P47756;B1AK87;B1AK88	F-actin-capping protein subunit beta	CAPZB	8.1348	2516700	5	22.929	23.7923	21.6735	22.6765	21.8768	22.6486
0.586719	1.10613	Q9Y2V2;H3BSW7;H3BUY4;H3BPY5;H3BNU9	Q9Y2V2;H3BSW7;H3BUY4;H3BPY5;H3BNU9	Calcium-regulated heat stable protein 1	CARHSP1	2.3606	7905100	3	21.3229	21.8197	21.7496	24.3891	21.979	21.8426
0.446914	-0.330915	P04040	P04040	Catalase	CAT	18.224	126900000	28	24.0354	24.7237	23.7302	23.912	23.9933	23.5914
0.0399889	-0.0766608	B5MD17;J3KS05;P83916;K7ELA4;C9JWS9;Q13185	B5MD17;J3KS05;P83916;K7ELA4	Chromobox protein homolog 1	CBX1	20.615	75124000	11	23.0225	23.6748	23.5641	23.9171	24.0089	22.1053
0.549382	-0.503661	P45973;F8VNY3	P45973;F8VNY3	Chromobox protein homolog 5	CBX5	18.28	12345000	7	22.2807	23.4785	22.7507	22.0671	22.1893	22.7425
0.139125	-0.270924	A0A0A6YYA4;Q96M83	A0A0A6YYA4;Q96M83	Coiled-coil domain-containing protein 7	CCDC7	4.6027	53831000	4	22.3882	23.8636	21.6684	21.9167	22.2077	22.9832
0.0485003	0.135425	F8VQ14;F5GWF6;P78371	F8VQ14;F5GWF6;P78371	T-complex protein 1 subunit beta	CCT2	12.706	18149000	10	21.6126	22.7994	22.5248	23.2028	23.4613	20.679
0.0084932	-0.0281487	B4DUR8;P49368-2;P49368	B4DUR8;P49368-2;P49368	T-complex protein 1 subunit gamma	CCT3	3.2309	842410	2	22.3583	22.6863	21.9401	20.1828	23.1099	23.6076
0.0647551	0.107927	P50991-2;P50991	P50991-2;P50991	T-complex protein 1 subunit delta	CCT4	14.627	14498000	11	21.4711	21.6949	21.876	22.8308	21.6599	20.8751
0.113312	-0.162474	E7ENZ3;B7ZAR1;E9PCA1;P48643-2;P48643	E7ENZ3;B7ZAR1;E9PCA1;P48643-2;P48643	T-complex protein 1 subunit epsilon	CCT5	21.402	28517000	16	22.0111	22.6323	22.5993	22.9594	22.4582	21.3378
0.953936	0.812084	P40227;P40227-2	P40227;P40227-2	T-complex protein 1 subunit zeta	CCT6A	35.631	26111000	5	22.151	21.8792	21.2502	22.2076	22.3507	23.1584
0.0826829	-0.199442	P50990-2;P50990;H7C4C8;P50990-3	P50990-2;P50990;H7C4C8;P50990-3	T-complex protein 1 subunit theta	CCT8	2.5376	3085800	2	21.6511	22.6189	21.7082	22.3254	20.2325	22.822
0.0396561	-0.0359802	K7EIU0;K7EQA9;Q16543	K7EIU0;K7EQA9;Q16543	Hsp90 co-chaperone Cdc37;Hsp90 co-chaperone Cdc37, N-terminally processed	CDC37	2.0231	6652200	3	21.6297	21.5385	21.2599	21.9962	21.035	21.2889
0.221118	0.282712	P60953;Q5JYX0;P60953-1	P60953;Q5JYX0;P60953-1	Cell division control protein 42 homolog	CDC42	3.1586	15522000	5	22.0131	21.4535	22.8109	21.8921	22.9413	22.2922
1.02651	-0.819492	P55287-2;P55287;H3BUU9;H3BQH2;J3KTG8;J3QKW5;J3QLE6;F5H5X9;J3KRI5;X6R3Y6;Q9ULB5;P55286	P55287-2;P55287;H3BUU9	Cadherin-11	CDH11	258.26	222200000	52	25.4985	24.6556	25.5051	23.9066	24.6482	24.6459
1.71655	-0.634289	P19022;C9J8J8;P19022-2;C9JMH2;C9J126	P19022;C9J8J8;P19022-2	Cadherin-2	CDH2	12.195	397970000	42	25.6013	26.051	25.9174	25.1739	25.0768	25.4161
0.720508	-1.47675	P55283-2;P55283	P55283-2;P55283	Cadherin-4	CDH4	2.8209	4590800	1	23.1636	22.4151	22.7131	21.1302	22.9392	19.7921
0.0162648	-0.0141951	E7ETN3;B4E1Z4;P00751;H7C5H1;A0A0G2JH38;P00751-2	E7ETN3;B4E1Z4;P00751;H7C5H1;A0A0G2JH38	Complement factor B;Complement factor B Ba fragment;Complement factor B Bb fragment	CFB	73.162	54107000	19	22.9823	22.6551	22.3995	23.0153	22.7613	22.2176
0.50573	0.357132	G3XAM2;E7ETH0;P05156;A0A2R8Y3M9;A0A087X0I2;D6R9Z8;CON__Q32PI4	G3XAM2;E7ETH0;P05156;A0A2R8Y3M9	Complement factor I;Complement factor I heavy chain;Complement factor I light chain	CFI	286.66	797210000	78	25.9558	26.4036	26.7474	26.9386	26.9278	26.3116
0.0324148	0.0286681	P23528;G3V1A4;E9PP50;E9PK25;E9PQB7;E9PLJ3;E9PS23;Q9Y281-3;Q9Y281	P23528;G3V1A4;E9PP50;E9PK25;E9PQB7	Cofilin-1	CFL1	181.01	1133400000	80	26.7242	27.4644	27.1792	27.4305	27.2748	26.7486
0.0905649	-0.117505	P10645;G5E968	P10645;G5E968	Chromogranin-A;Vasostatin-1;Vasostatin-2;EA-92;ES-43;Pancreastatin;SS-18;WA-8;WE-14;LF-19;Catestatin;AL-11;GV-19;GR-44;ER-37;GE-25;Serpinin-RRG;Serpinin;p-Glu serpinin precursor	CHGA	2.3598	12196000	3	22.8653	23.2174	21.9989	23.0435	22.6316	22.0539
0.399568	0.863286	P05060;A0A0A0MT66	P05060;A0A0A0MT66	Secretogranin-1;PE-11;GAWK peptide;CCB peptide	CHGB	19.899	39369000	9	21.4493	22.1895	21.96	21.0066	23.962	23.22
0.528805	0.251053	Q70JA7	Q70JA7	Chondroitin sulfate synthase 3	CHSY3	17.245	1840100	1	22.7397	23.0817	22.5111	22.7905	23.2255	23.0696
1.08466	0.542978	P12277;G3V4N7;H0YJG0;G3V461;G3V2I1;H0YJK0	P12277;G3V4N7	Creatine kinase B-type	CKB	173.88	658760000	62	25.5408	26.0453	26.309	26.4251	26.6424	26.4565
0.139233	-0.139633	Q9Y240	Q9Y240	C-type lectin domain family 11 member A	CLEC11A	2.1952	14266000	3	21.9664	21.8202	22.6983	22.4681	21.5937	22.0042
0.0481756	-0.0429993	O00299	O00299	Chloride intracellular channel protein 1	CLIC1	40.336	137610000	29	24.3115	23.8086	24.6843	24.5252	23.9334	24.2169
0.569955	-0.631413	Q9Y696	Q9Y696	Chloride intracellular channel protein 4	CLIC4	16.899	38388000	10	22.4424	22.6072	23.334	22.5767	22.5684	21.3442
0.692235	0.326133	O94985-2;O94985;Q5SR54;A0A3B3ITY6	O94985-2;O94985;Q5SR54	Calsyntenin-1;Soluble Alc-alpha;CTF1-alpha	CLSTN1	104.4	661580000	80	25.7949	26.3363	26.1253	26.5774	26.1213	26.5362
0.661088	0.479969	Q9H4D0	Q9H4D0	Calsyntenin-2	CLSTN2	3.0196	11301000	4	21.2084	22.1594	22.1025	22.085	22.4775	22.3476
0.203376	-0.34988	Q9BQT9;Q9BQT9-2	Q9BQT9;Q9BQT9-2	Calsyntenin-3	CLSTN3	21.488	28710000	9	22.1182	24.266	22.5204	22.4633	22.6682	22.7235
0.157965	0.122703	A0A087WVQ6;Q00610-2;Q00610;J3KS13;A0A087WX41;P53675-2;P53675;J3KRF5;K7EJJ5	A0A087WVQ6;Q00610-2;Q00610	Clathrin heavy chain;Clathrin heavy chain 1	CLTC	15.99	43078000	13	22.0656	22.5865	22.814	22.9829	22.4851	22.3661
0.69008	0.342286	P10909-4;P10909;P10909-5;P10909-2;P10909-3;H0YAS8;H0YC35;H0YLK8;E5RG36;E5RGB0;E5RH61;E5RJZ5;E7ERK6;E7ETB4	P10909-4;P10909;P10909-5;P10909-2;P10909-3;H0YAS8	Clusterin;Clusterin beta chain;Clusterin alpha chain	CLU	123.43	730320000	37	26.5307	26.0556	26.0236	26.8288	26.5141	26.2937
0.608426	-1.34881	P30085-2;P30085	P30085-2;P30085	UMP-CMP kinase	CMPK1	6.5547	5628800	5	22.4135	23.1666	23.1406	22.9382	19.7046	22.0314
0.227118	0.540997	Q96KP4-2;Q96KP4;J3KSS4;J3QRP4;J3QQN6;J3QR27;J3QLU1;J3QKQ0;J3QRD0;J3QRA8;J3QL02;J3KSV5;A0A087WYZ1;J3QKT2	Q96KP4-2;Q96KP4;J3KSS4;J3QRP4;J3QQN6;J3QR27;J3QLU1;J3QKQ0;J3QRD0;J3QRA8;J3QL02;J3KSV5;A0A087WYZ1;J3QKT2	Cytosolic non-specific dipeptidase	CNDP2	2.041	4695000	2	22.0412	22.6036	21.5219	23.8578	20.9073	23.0245
0.304448	0.337513	E9PDU6;Q15417-3;Q15417-2;Q15417	E9PDU6;Q15417-3;Q15417-2;Q15417	Calponin;Calponin-3	CNN3	5.3822	6247400	2	22.0059	23.0812	22.0285	22.6609	22.2523	23.2149
0.950408	-1.19689	Q5T8H6;P26992	Q5T8H6;P26992	Ciliary neurotrophic factor receptor subunit alpha	CNTFR	2.4382	10480000	5	22.4377	23.3177	22.3031	22.3878	20.6757	21.4044
0.0195395	0.0313123	A0A1W2PQ86;A0A1W2PQ11;Q02246;A0A1B0GTL7;A0A1W2PQJ4;A0A1W2PPQ9;A0A1W2PR60	A0A1W2PQ86;A0A1W2PQ11;Q02246;A0A1B0GTL7	Contactin-2	CNTN2	13.462	36081000	14	23.5185	23.2384	22.2326	22.3674	23.0948	23.6212
1.47952	-2.04781	P12107-4;P12107-3;P12107;P12107-2;H7C381;C9JMN2;A0A2R8Y4M5;A0A2R8Y4I5;A0A2R8Y5N4;A0A2R8YDU3	P12107-4;P12107-3;P12107;P12107-2;H7C381;C9JMN2;A0A2R8Y4M5;A0A2R8Y4I5;A0A2R8Y5N4;A0A2R8YDU3	Collagen alpha-1(XI) chain	COL11A1	78.389	49786000	12	24.7606	23.5074	22.8963	22.2535	21.6652	21.1021
1.27161	-0.725946	A0A087X0K0;P39059	A0A087X0K0;P39059	Collagen alpha-1(XV) chain;Restin;Restin-2;Restin-3;Restin-4	COL15A1	139.22	1293100000	93	28.1924	27.6611	27.3393	26.8149	27.1503	27.0497
0.253123	0.593187	P39060-2;P39060-1;P39060;H7BXV5;H7C457	P39060-2;P39060-1;P39060;H7BXV5;H7C457	Collagen alpha-1(XVIII) chain;Endostatin	COL18A1	7.5982	8919300	9	21.93	20.1895	23.3512	22.2548	22.2368	22.7588
1.59498	-1.08173	P02452;CON__Q862S4;I3L3H7	P02452	Collagen alpha-1(I) chain	COL1A1	323.31	8547000000	306	31.0831	30.3216	30.0883	29.3064	29.3675	29.5739
0.944776	-0.73967	A0A087WTA8;P08123	A0A087WTA8;P08123	Collagen alpha-2(I) chain	COL1A2	323.31	11711000000	395	31.4394	30.4615	30.6036	29.9461	29.8432	30.4962
0.111986	-0.180799	P02458-1;P02458	P02458-1;P02458	Collagen alpha-1(II) chain;Collagen alpha-1(II) chain;Chondrocalcin	COL2A1	3.4107	0	1	22.6196	21.9959	23.165	22.6654	21.4885	23.0842
1.27453	-0.835171	P02461;P02461-2;H7C435	P02461;P02461-2	Collagen alpha-1(III) chain	COL3A1	323.31	16751000000	472	31.9684	31.0715	31.1772	30.4733	30.4292	30.8092
1.12855	-1.12413	A0A3B3ISV3;P02462	A0A3B3ISV3;P02462	Collagen alpha-1(IV) chain;Arresten	COL4A1	78.863	106320000	23	25.1868	23.6886	24.2278	23.5702	23.1297	23.0309
0.698662	-1.42838	P08572;A0A3B3IS47;A0A3B3IRV2;A0A3B3IT80;A0A3B3ITQ8	P08572	Collagen alpha-2(IV) chain;Canstatin	COL4A2	17.421	185490000	23	25.6482	24.4828	25.0583	21.9113	24.3001	24.6928
0.607017	-0.50665	P20908;P20908-2;H7BY82	P20908;P20908-2	Collagen alpha-1(V) chain	COL5A1	323.31	2629100000	181	29.0271	28.254	28.2838	27.7139	27.7653	28.5658
1.00623	-0.690573	P05997;A0A087WYX9;A0A3B3IRH9	P05997;A0A087WYX9	Collagen alpha-2(V) chain	COL5A2	323.31	1285800000	107	28.2006	27.1287	27.6321	26.8196	26.9459	27.1243
0.940556	-0.288397	A0A087X0S5;P12109	A0A087X0S5;P12109	Collagen alpha-1(VI) chain	COL6A1	323.31	3529500000	219	29.2034	28.9099	28.7364	28.6305	28.6045	28.7495
1.26771	-0.549061	P12110;P12110-3;P12110-2;C9JH44;H7C0M5	P12110;P12110-3;P12110-2	Collagen alpha-2(VI) chain	COL6A2	177.98	476160000	43	26.6057	26.0375	26.1512	25.6964	25.5431	25.9077
1.2856	-0.625573	P12111-2;P12111;E7ENL6;P12111-4;P12111-3;P12111-5;C9JNG9	P12111-2;P12111;E7ENL6;P12111-4	Collagen alpha-3(VI) chain	COL6A3	323.31	603490000	121	27.0572	26.3374	26.5369	26.0647	26.1233	25.8668
0.609639	-1.0481	M0QXB4;O14579-2;O14579	M0QXB4;O14579-2;O14579	Coatomer subunit epsilon	COPE	3.0262	2479500	1	22.58	22.8325	22.8866	21.8661	20.325	22.9637
0.219894	-0.776638	H0Y8X7;Q9Y678	H0Y8X7;Q9Y678	Coatomer subunit gamma-1	COPG1	2.4547	5005300	5	22.2334	22.7869	22.7397	22.6028	23.6758	19.1514
1.54686	-2.66772	F8VXB1;F8VUC5;F8W156;F8W651;F8VYZ4;F8VVA7;P61923-5;P61923	F8VXB1;F8VUC5;F8W156;F8W651;F8VYZ4;F8VVA7;P61923-5;P61923	Coatomer subunit zeta-1	COPZ1	2.1879	11081000	7	24.6308	23.2211	23.6651	21.6818	22.0022	19.8299
0.444921	-0.358154	Q9ULV4;Q9ULV4-2;Q9ULV4-3;B4E3S0;F8W1H8;F8VUX3;F8VSA4;F8VRE9;H0YHL7;F8VTT6;F8VVB7	Q9ULV4;Q9ULV4-2;Q9ULV4-3;B4E3S0	Coronin-1C;Coronin	CORO1C	1.9662	8405400	5	22.0642	22.8402	21.9998	22.0505	21.5268	22.2523
0.273941	-0.335825	H3BT58;Q14019	H3BT58;Q14019	Coactosin-like protein	COTL1	74.599	77526000	18	23.4826	24.3068	23.1652	24.0255	22.9815	22.9401
0.692393	0.551973	P16870-2;P16870;D6RF88;C9JE88;D6R930;H0YAM0	P16870-2;P16870	Carboxypeptidase E	CPE	93.046	594490000	86	25.3923	25.6372	26.3343	25.9205	26.3927	26.7065
0.34536	0.292585	P29762;B5MCB5	P29762	Cellular retinoic acid-binding protein 1	CRABP1	145.66	544840000	44	25.4542	26.3506	25.7595	26.3668	26.3925	25.6827
0.261313	0.434007	P29373;Q5SYZ4	P29373;Q5SYZ4	Cellular retinoic acid-binding protein 2	CRABP2	62.733	55009000	7	21.9379	22.7098	23.6866	24.0234	23.0371	22.5758
0.0828785	-0.2062	P46109	P46109	Crk-like protein	CRKL	1.8231	2862000	2	22.2892	21.9026	22.6069	20.8362	23.7094	21.6345
0.0432044	0.075587	E9PD68;Q14194;Q14194-2	E9PD68;Q14194;Q14194-2	Dihydropyrimidinase-related protein 1	CRMP1	3.4489	18987000	6	21.3574	22.4994	22.7437	22.4646	22.884	21.4787
0.627474	-2.04671	P55060-2;P55060-4;P55060-3;P55060	P55060-2;P55060-4;P55060-3;P55060	Exportin-2	CSE1L	7.6996	3566900	4	21.9524	22.7884	23.7617	22.4622	21.8328	18.0675
0.115357	0.0834306	P01034	P01034	Cystatin-C	CST3	65.464	938370000	35	26.4894	26.3583	26.9553	26.8336	26.9131	26.3065
0.139889	-0.24223	A0A1W2PS52;P04080	A0A1W2PS52;P04080	Cystatin-B	CSTB	7.2503	63115000	9	23.2269	22.3463	23.301	23.8411	22.1452	22.1613
0.252724	-0.774714	E5RGG4;E5RJ43;E5RGS1;A0A087WZL6;E5RGU3;E5RHJ5;E5RFG3;E5RFK9;E5RFM5;E5RJP7;E5RGD2;G3XAM7;P35221-3;P35221;P35221-2	E5RGG4;E5RJ43;E5RGS1;A0A087WZL6;E5RGU3;E5RHJ5;E5RFG3;E5RFK9;E5RFM5;E5RJP7;E5RGD2;G3XAM7;P35221-3;P35221;P35221-2	Catenin alpha-1	CTNNA1	3.3638	4619600	3	21.1649	22.3847	23.9936	21.4067	20.3755	23.4367
0.280956	0.336676	P07858;R4GMQ5	P07858	Cathepsin B;Cathepsin B light chain;Cathepsin B heavy chain	CTSB	11.341	75519000	19	23.3316	22.2966	23.4202	22.8039	23.3411	23.9134
0.177143	0.236088	P07711	P07711	Cathepsin L1;Cathepsin L1 heavy chain;Cathepsin L1 light chain	CTSL	4.1108	38439000	9	21.2994	22.3477	22.5313	22.955	21.9535	21.9782
1.49154	0.939139	O60888-3;O60888;O60888-2;C9IZG4;C9IZQ5	O60888-3;O60888;O60888-2;C9IZG4	Protein CutA	CUTA	155.71	285380000	34	24.7074	24.1935	24.4648	25.395	24.9593	25.8286
0.599582	0.832198	C9JFR7;P99999	C9JFR7;P99999	Cytochrome c	CYCS	3.1094	4895300	3	20.8672	22.5856	22.3225	22.6564	22.266	23.3495
2.27131	-0.829543	Q14118;C9JYS1;C9J196;C9JQL4	Q14118	Dystroglycan;Alpha-dystroglycan;Beta-dystroglycan	DAG1	32.332	325720000	36	25.8673	25.5694	25.8219	25.1253	24.9323	24.7125
1.40932	-1.04136	P07585;P07585-2;F8VXZ8;F8VUF6;F8VWU0;P07585-4;P07585-3;F8VX58;H0YI87;H0YIH3;F8VNV6	P07585;P07585-2	Decorin	DCN	323.31	3334700000	127	29.725	29.0947	28.8286	27.9	28.0172	28.607
0.450593	0.584806	O95865;A0A140T971;Q5SSV3;Q5SRR8;H0Y7N1	O95865;A0A140T971;Q5SSV3;Q5SRR8	N(G),N(G)-dimethylarginine dimethylaminohydrolase 2	DDAH2	18.548	36232000	11	22.0284	23.3765	22.3329	23.4967	23.5925	22.403
0.0357544	-0.0302938	A0A1X7SBZ2;A0A1W2PQ51;Q92841-1;Q92841-3;Q92841-2;Q92841	A0A1X7SBZ2;A0A1W2PQ51;Q92841-1;Q92841-3;Q92841-2;Q92841	Probable ATP-dependent RNA helicase DDX17	DDX17	16.676	2122500	10	22.3422	22.1523	22.3475	21.906	22.0411	22.804
0.678149	0.43148	H0Y400;A0A140T9X3;A0A0G2JJZ9;Q5STU3;O00148;Q13838;Q13838-2;H0YCC6;A0A140T9X9;A0A140T996;F6UJC5;A0A140TA18;F6WLT2;O00148-2	H0Y400;A0A140T9X3;A0A0G2JJZ9;Q5STU3;O00148;Q13838;Q13838-2;H0YCC6;A0A140T9X9;A0A140T996;F6UJC5;A0A140TA18;F6WLT2;O00148-2	ATP-dependent RNA helicase DDX39A;Spliceosome RNA helicase DDX39B	DDX39B;DDX39A	13.837	14885000	4	22.2527	22.2057	22.4297	22.7171	23.2192	22.2463
0.142755	-0.121684	Q5HYB6;P06753-5;P06753-2;A0A087WWU8;P06753-4;P06753-3;P06753-6;Q5VU61;J3KN67;D6R904;P06753-7;P06753;D6RFM2	Q5HYB6;P06753-5;P06753-2;A0A087WWU8;P06753-4;P06753-3;P06753-6;Q5VU61;J3KN67;D6R904;P06753-7;P06753	Tropomyosin alpha-3 chain	DKFZp686J1372;TPM3	69.341	152660000	24	23.991	24.9798	24.3071	24.4715	24.3747	24.0666
0.566752	-0.741756	H0Y7V4;A0A075B6F3;Q96JB1-2;Q96JB1	H0Y7V4;A0A075B6F3;Q96JB1-2;Q96JB1	Dynein heavy chain 8, axonemal	DNAH8	10.24	116870000	17	23.7506	22.531	23.7229	21.7554	23.0706	22.9533
0.0768552	0.107076	Q9C005	Q9C005	Protein dpy-30 homolog	DPY30	8.7647	26814000	9	21.5094	21.4684	21.9324	21.1813	21.3788	22.6715
0.383175	0.276406	A0A1C7CYX9;Q16555;Q16555-2;E5RFU4;D6RF19	A0A1C7CYX9;Q16555;Q16555-2	Dihydropyrimidinase-related protein 2	DPYSL2	69.588	251410000	55	24.6793	25.3196	24.5568	25.1257	25.4588	24.8004
0.335564	-0.578265	Q14195;Q14195-2;H0YBT4;H0YB87;Q14117	Q14195;Q14195-2;H0YBT4	Dihydropyrimidinase-related protein 3	DPYSL3	3.1235	4381000	4	22.3905	21.7864	22.3596	22.1362	22.422	20.2435
0.53106	0.579282	Q8NBI3	Q8NBI3	Draxin	DRAXIN	4.6245	42181000	7	22.3316	22.1798	22.0655	22.9912	21.8626	23.4609
0.0989437	-0.210238	Q02487-2;Q02487;A0A3B3ISU0	Q02487-2;Q02487;A0A3B3ISU0	Desmocollin-2	DSC2	20.992	46584000	11	22.7494	22.7077	23.8421	23.7031	21.571	23.3944
0.118715	-0.366653	Q14574-2;Q14574	Q14574-2;Q14574	Desmocollin-3	DSC3	13.317	134270000	13	22.0714	23.428	24.7619	22.4867	22.016	24.6587
1.56432	-0.74025	Q14126;J3KSI6	Q14126	Desmoglein-2	DSG2	205.73	659640000	70	26.9007	26.519	26.9173	25.9314	25.8047	26.3801
0.62887	-0.778058	E9PGG1;E7EU01;E7EUM4;E7ERR6;E7ERH4;E7ET01;E7ETL8;E7EQU2;E7ESD3;E7EMU4;E7EV09;E7EQL5;Q13409-6;Q13409-3;Q13409-7;Q13409-2;Q13409-5;Q13409	E9PGG1;E7EU01;E7EUM4;E7ERR6;E7ERH4;E7ET01;E7ETL8;E7EQU2;E7ESD3;E7EMU4;E7EV09;E7EQL5;Q13409-6;Q13409-3;Q13409-7;Q13409-2;Q13409-5;Q13409	Cytoplasmic dynein 1 intermediate chain 2	DYNC1I2	21.059	8245200	8	23.5821	22.0111	21.911	21.9465	21.7352	21.4883
0.282089	-0.542709	P30084	P30084	Enoyl-CoA hydratase, mitochondrial	ECHS1	2.49	9706400	2	21.9847	21.9323	23.1026	20.4601	22.312	22.6194
0.325041	-0.169178	Q5VTE0;P68104;A0A087WVQ9;P68104-2;A0A087WV01;A0A2U3TZH3;Q05639;A0A2R8Y488;A0A2R8Y660;Q5JR01;A6PW80;A0A2R8YDN5	Q5VTE0;P68104;A0A087WVQ9;P68104-2;A0A087WV01;A0A2U3TZH3;Q05639	Putative elongation factor 1-alpha-like 3;Elongation factor 1-alpha 1;Elongation factor 1-alpha;Elongation factor 1-alpha 2	EEF1A1P5;EEF1A1;EEF1A2	106.12	504940000	94	26.3693	26.05	25.9734	26.0904	26.1814	25.6134
0.447921	0.431887	F8WF65;F2Z2G2;C9JZW3;P24534	F8WF65;F2Z2G2;C9JZW3;P24534	Elongation factor 1-beta	EEF1B2	29.475	32681000	10	22.071	21.701	22.2374	23.199	21.9991	22.107
0.225154	-0.268003	E9PK01;A0A087X1X7;E9PRY8;P29692;P29692-2;E9PQZ1;P29692-3;P29692-4;E9PQC9;H0YE58;H0YE72;E9PPR1;E9PL12;E9PQ49;E9PI39;E9PMW7;E9PIZ1;E9PK06;E9PL71;H0YCK7	E9PK01;A0A087X1X7;E9PRY8;P29692;P29692-2;E9PQZ1;P29692-3;P29692-4;E9PQC9;H0YE58;H0YE72;E9PPR1;E9PL12;E9PQ49;E9PI39	Elongation factor 1-delta	EEF1D	25.467	24060000	14	22.9148	21.9412	21.9335	21.3391	22.413	22.2335
0.378106	-0.846595	P26641;P26641-2	P26641;P26641-2	Elongation factor 1-gamma	EEF1G	17.8	51309000	15	21.8197	23.9637	23.1003	23.5069	21.2362	21.6008
0.297155	0.341555	P13639	P13639	Elongation factor 2	EEF2	23.634	165150000	37	24.6852	23.5825	24.1413	24.8491	23.7974	24.7871
0.197551	-0.413584	A0A0U1RQV3;Q12805-5;Q12805-2;Q12805-4;Q12805-3;Q12805	A0A0U1RQV3;Q12805-5;Q12805-2;Q12805-4;Q12805-3;Q12805	EGF-containing fibulin-like extracellular matrix protein 1	EFEMP1	2.8592	23130000	6	22.4364	21.9721	24.3462	21.903	22.506	23.105
0.0732505	0.0517998	P60842;J3QR64;J3KTB5;J3QL43;J3QS69;J3KT12;P60842-2;J3KTN0;J3QLN6;J3KSZ0;E7EQG2;Q14240;Q14240-2;J3KT04;J3KS93;E7EMV8;J3KSN7;J3QKZ9;J3KS25	P60842;J3QR64;J3KTB5;J3QL43;J3QS69;J3KT12;P60842-2;J3KTN0;J3QLN6;J3KSZ0;E7EQG2;Q14240;Q14240-2	Eukaryotic initiation factor 4A-I;Eukaryotic initiation factor 4A-II;Eukaryotic initiation factor 4A-II, N-terminally processed	EIF4A1;EIF4A2	17.858	43439000	9	22.4544	22.0701	21.7414	22.3278	22.2226	21.8708
0.00062533	0.00240262	F8W0K0;F8VYE9;F8VSC7;F8VP89;F8VX11;E7EX17;P23588-2;P23588	F8W0K0;F8VYE9;F8VSC7;F8VP89;F8VX11;E7EX17;P23588-2;P23588	Eukaryotic translation initiation factor 4B	EIF4B	2.5807	7264900	2	21.2219	22.4209	23.2941	23.1425	23.6641	20.1376
0.417134	-1.11045	Q15056-2;Q15056	Q15056-2;Q15056	Eukaryotic translation initiation factor 4H	EIF4H	1.9503	4855900	2	22.796	21.8046	21.972	23.0937	20.8037	19.3439
0.0295966	-0.0537351	I3L397;I3L504;Q6IS14;P63241;F8WCJ1;C9J7B5;C9J4W5;Q9GZV4;P63241-2	I3L397;I3L504;Q6IS14;P63241;F8WCJ1;C9J7B5;C9J4W5;Q9GZV4;P63241-2	Eukaryotic translation initiation factor 5A;Eukaryotic translation initiation factor 5A-1-like;Eukaryotic translation initiation factor 5A-1;Eukaryotic translation initiation factor 5A-2	EIF5A;EIF5AL1;EIF5A2	4.8728	45956000	13	22.461	22.1509	23.8535	22.5113	23.3938	22.3991
0.4516	-0.99509	A0A0U1RQP7;Q8N8S7-3;Q8N8S7-2;Q8N8S7	A0A0U1RQP7;Q8N8S7-3;Q8N8S7-2;Q8N8S7	Protein enabled homolog	ENAH	19.357	6274000	10	21.415	21.5975	23.0723	21.5911	22.0356	19.4729
0.0133492	0.0123437	P06733;A0A2R8Y6G6;P06733-2;K7EM90;A0A2R8Y879;A0A2R8YEM5;K7ERS8;A0A2R8Y798;A0A2R8YEG5;A0A2R8Y6I8	P06733;A0A2R8Y6G6;P06733-2	Alpha-enolase	ENO1	323.31	3279900000	170	28.1036	29.0851	28.7179	28.4541	28.6653	28.8243
0.239011	0.431213	P09104-2;P09104;F5H0C8;P13929-3;P13929-2;P13929;E5RI09;E5RG95;K7EPM1;K7EKN2;E5RGZ4;F5H1C3	P09104-2;P09104;F5H0C8;P13929-3;P13929-2;P13929	Gamma-enolase;Enolase;Beta-enolase	ENO2;ENO3	78.348	91168000	17	22.5131	24.6151	22.8483	23.48	23.4681	24.322
0.579729	-0.79938	E7EUF1;Q13822;Q13822-3;Q13822-2;E5RJ49;E5RIA2	E7EUF1;Q13822;Q13822-3;Q13822-2;E5RJ49;E5RIA2	Ectonucleotide pyrophosphatase/phosphodiesterase family member 2	ENPP2	6.3219	36665000	12	22.1649	22.2564	23.4609	22.7294	21.3967	21.358
0.136738	-0.161722	Q9NZ08;Q9NZ08-2	Q9NZ08;Q9NZ08-2	Endoplasmic reticulum aminopeptidase 1	ERAP1	5.5562	3589200	2	22.9753	21.8262	22.0959	22.5471	22.2243	21.6409
0.429658	-0.657263	P84090;G3V279	P84090;G3V279	Enhancer of rudimentary homolog	ERH	125.19	93890000	10	22.4658	22.4533	24.17	21.7366	22.7617	22.619
0.0324013	0.0791225	P30040;F8VY02	P30040	Endoplasmic reticulum resident protein 29	ERP29	10.21	9314700	8	21.9181	23.3247	20.9969	21.7328	21.6471	23.0972
0.0726924	-0.124333	H7BY36;A0A0D9SFL3;B0QYK0;C9JGE3;Q01844-2;Q01844-6;Q01844-3;Q01844;Q01844-5	H7BY36;A0A0D9SFL3;B0QYK0;C9JGE3;Q01844-2;Q01844-6;Q01844-3;Q01844;Q01844-5	RNA-binding protein EWS	EWSR1	6.4202	16503000	3	23.0149	22.0621	22.2055	21.6249	23.3278	21.9568
0.193398	-0.13505	E7EQR4;P15311;E9PQ82;E9PNV3;A0A2R8Y5P0	E7EQR4;P15311	Ezrin	EZR	126.62	564670000	67	26.293	26.1457	26.4168	25.6422	26.3468	26.4614
0.51897	0.321565	P07148;A8MW49;Q9NQV6-6	P07148;A8MW49;Q9NQV6-6	Fatty acid-binding protein, liver	FABP1	112.05	133260000	24	23.7287	24.1285	24.6549	24.5724	24.414	24.4904
0.450116	1.13127	Q01469;I6L8B7;A8MUU1	Q01469;I6L8B7	Fatty acid-binding protein, epidermal	FABP5	57.099	63346000	19	21.3015	22.2052	22.231	25.1039	22.232	21.7956
1.48055	1.34567	O15540;O15540-2	O15540;O15540-2	Fatty acid-binding protein, brain	FABP7	28.599	171540000	22	22.5688	23.8957	23.4085	24.9471	24.5788	24.384
0.200451	-0.122336	Q92520;C9JP35;C9JMN4	Q92520;C9JP35;C9JMN4	Protein FAM3C	FAM3C	21.998	159500000	29	24.6363	23.9747	24.5554	24.0523	24.3392	24.4078
0.294082	-0.500953	A0A0U1RQF0;P49327	A0A0U1RQF0;P49327	Fatty acid synthase;[Acyl-carrier-protein] S-acetyltransferase;[Acyl-carrier-protein] S-malonyltransferase;3-oxoacyl-[acyl-carrier-protein] synthase;3-oxoacyl-[acyl-carrier-protein] reductase;3-hydroxyacyl-[acyl-carrier-protein] dehydratase;Enoyl-[acyl-carrier-protein] reductase;Oleoyl-[acyl-carrier-protein] hydrolase	FASN	9.3927	4523300	4	21.3251	22.3706	22.9778	22.6847	21.0511	21.4348
0.550381	-0.318972	B1AHL2;P23142-4;P23142-2;P23142-3;B1AHM7;H7C1M6;B1AHM9;B1AHN3;B1AHM8	B1AHL2;P23142-4	Fibulin-1	FBLN1	323.31	1934400000	86	28.1769	28.2237	27.9237	28.0504	28.0051	27.3119
1.22784	-1.86264	P23142;CON__ENSEMBL:ENSBTAP00000016046	P23142	Fibulin-1	FBLN1	20.562	273300000	21	25.5838	24.4989	25.8283	22.5557	23.2242	24.5431
0.461421	0.462437	P98095;P98095-2	P98095;P98095-2	Fibulin-2	FBLN2	2.4447	19855000	5	22.242	22.3649	22.0787	23.5369	22.1982	22.3378
1.90662	-1.91018	A0A087WYV8;P35556	A0A087WYV8;P35556	Fibrillin-2	FBN2	14.662	117870000	17	24.8662	24.4689	24.8106	21.9713	23.3542	23.0898
2.39077	2.89961	P02671-2;P02671;A0A087WUA0	P02671-2;P02671;A0A087WUA0	Fibrinogen alpha chain;Fibrinopeptide A;Fibrinogen alpha chain	FGA	30.224	143140000	21	21.7489	23.4059	22.4687	25.3311	25.6343	25.357
5.10582	2.64122	P02675;D6REL8	P02675;D6REL8	Fibrinogen beta chain;Fibrinopeptide B;Fibrinogen beta chain	FGB	65.776	159810000	22	22.5297	22.705	22.6593	25.3408	25.3492	25.1278
0.306165	0.31598	Q8TAT2	Q8TAT2	Fibroblast growth factor-binding protein 3	FGFBP3	103.89	34838000	7	23.0418	22.6513	21.7679	22.43	22.9927	22.9862
3.52963	3.44636	C9JEU5;C9JC84;P02679-2;P02679;C9JPQ9;C9JU00	C9JEU5;C9JC84;P02679-2;P02679	Fibrinogen gamma chain	FGG	49.243	148970000	29	22.464	21.8344	21.5771	25.4737	25.5808	25.16
0.940533	-1.11899	A0A1B0GVK0;Q14314	A0A1B0GVK0;Q14314	Fibroleukin	FGL2	3.2591	9198600	9	22.8398	21.4031	21.9848	21.5437	21.0489	20.2782
0.99713	-0.802813	P07954-2;P07954	P07954-2;P07954	Fumarate hydratase, mitochondrial	FH	2.0239	15994000	5	22.8664	23.0087	22.1333	21.4026	22.3122	21.8853
1.13441	-1.30979	Q5W0X3;A0A087WZM5;P62942	Q5W0X3;A0A087WZM5;P62942	Peptidyl-prolyl cis-trans isomerase;Peptidyl-prolyl cis-trans isomerase FKBP1A	FKBP1A	13.369	19980000	9	22.7742	24.0152	22.68	22.4669	21.7383	21.3348
0.605796	1.35884	Q00688;G3V5F2	Q00688	Peptidyl-prolyl cis-trans isomerase FKBP3	FKBP3	19.36	96794000	22	20.6968	23.8376	23.4481	24.1755	24.2291	23.6544
0.386148	-0.319436	Q02790	Q02790	Peptidyl-prolyl cis-trans isomerase FKBP4;Peptidyl-prolyl cis-trans isomerase FKBP4, N-terminally processed	FKBP4	4.8596	21353000	7	23.5324	23.1601	22.475	22.5338	22.6242	23.0512
0.224022	-0.139383	Q60FE5;P21333-2;P21333;A0A087WWY3;H0Y5F3;H0Y5C6;F8WE98;O75369-5;O75369-4;O75369-6;O75369-3;O75369-2;O75369-9;O75369;O75369-8	Q60FE5;P21333-2;P21333;A0A087WWY3	Filamin-A	FLNA	25.051	94103000	31	23.9028	23.7816	23.6035	23.7365	23.9474	23.1859
0.0824451	-0.252068	Q14315-2;Q14315	Q14315-2;Q14315	Filamin-C	FLNC	4.8272	11503000	6	22.8909	21.5796	22.3962	21.0305	24.0594	21.0205
0.173331	-0.250573	A0A3B3IRN5;Q06828	A0A3B3IRN5;Q06828	Fibromodulin	FMOD	8.871	9391100	4	23.1629	23.5987	21.8671	22.5987	22.3436	22.9345
0.366638	0.139091	P02751-17;P02751-3;P02751;P02751-6;P02751-5;P02751-10;P02751-9;P02751-14;P02751-8;P02751-4;P02751-12;H0Y7Z1;P02751-16;P02751-2;H0Y4K8	P02751-17;P02751-3;P02751;P02751-6;P02751-5;P02751-10;P02751-9;P02751-14;P02751-8;P02751-4;P02751-12;H0Y7Z1	Fibronectin;Anastellin;Ugl-Y1;Ugl-Y2;Ugl-Y3	FN1	323.31	3683400000	271	28.8935	28.6103	29.1383	29.1063	28.9756	28.9774
0.0270427	-0.0448863	C9JYK2;E9PGA7;Q9Y2L6-2;Q9Y2L6	C9JYK2;E9PGA7;Q9Y2L6-2;Q9Y2L6	FERM domain-containing protein 4B	FRMD4B	5.7359	88300000	4	22.5587	21.8126	22.1165	21.2532	22.0713	23.0287
0.131537	-0.119162	Q16658;C9JPH9;C9JFC0;A0A0A0MSB2	Q16658	Fascin	FSCN1	35.218	220700000	28	24.8481	24.6224	24.9527	25.161	24.8227	24.082
0.215207	-0.283455	Q12841-2;Q12841	Q12841-2;Q12841	Follistatin-related protein 1	FSTL1	5.972	105550000	10	23.396	23.2158	24.3794	22.9969	23.0395	24.1045
0.27214	-0.296902	E9PEB5;Q96AE4;Q96AE4-2;C9JSZ1	E9PEB5;Q96AE4;Q96AE4-2;C9JSZ1	Far upstream element-binding protein 1	FUBP1	40.535	2481000	5	22.796	21.8406	22.9596	22.7236	21.8196	22.1624
0.340337	-0.673868	H0YGU9;H0YFU9;A0A3B3ISG8;Q9NY28	H0YGU9;H0YFU9;A0A3B3ISG8;Q9NY28	Probable polypeptide N-acetylgalactosaminyltransferase 8	GALNT8	4.0644	13386000	0	22.1112	23.709	22.2731	22.9143	22.3807	20.7768
0.0289991	-0.0503578	Q14697;Q14697-2;F5H6X6;E9PKU7;E9PNH1	Q14697;Q14697-2;F5H6X6;E9PKU7	Neutral alpha-glucosidase AB	GANAB	54.294	43741000	13	22.0832	22.5571	23.455	22.0838	22.3841	23.4764
1.44756	1.55875	P17677;P17677-2	P17677;P17677-2	Neuromodulin	GAP43	106.87	54094000	27	21.1192	22.3491	21.4896	23.6128	23.4923	22.5291
0.0321085	-0.0192369	P04406;P04406-2;E7EUT5;O14556	P04406;P04406-2;E7EUT5	Glyceraldehyde-3-phosphate dehydrogenase	GAPDH	207.77	1451700000	139	27.488	27.9601	27.3416	27.6837	27.6217	27.4266
0.0306088	-0.0369873	A0A1W2PQV2;H3BUH9;P23434	A0A1W2PQV2;H3BUH9;P23434	Glycine cleavage system H protein, mitochondrial	GCSH	1.9881	0	1	23.1671	23.5476	22.2134	22.8208	22.8803	23.116
0.212776	-0.472735	Q99988	Q99988	Growth/differentiation factor 15	GDF15	3.7218	7414200	4	22.0909	22.9056	22.1812	23.3334	20.4835	21.9427
0.948157	0.760283	P31150;G5E9U5	P31150	Rab GDP dissociation inhibitor alpha	GDI1	216.31	668570000	91	25.717	26.5545	25.332	26.7035	26.7558	26.4251
0.8527	0.359538	P50395;P50395-2;Q5SX87;V9GYF8;Q5SX90;Q5SX91;Q5SX86;V9GYJ7	P50395;P50395-2;Q5SX87	Rab GDP dissociation inhibitor beta	GDI2	49.227	215790000	39	24.5838	24.4099	24.5141	25.1702	24.8986	24.5175
0.0193343	0.0267124	Q92820	Q92820	Gamma-glutamyl hydrolase	GGH	17.551	38831000	17	23.0938	21.8649	22.5632	22.3935	23.0936	22.1149
0.800477	-0.334914	Q04760-2;Q04760	Q04760-2;Q04760	Lactoylglutathione lyase	GLO1	9.5062	61317000	25	23.4758	23.3382	22.8526	22.9429	22.8078	22.9112
0.828431	0.429542	O76003	O76003	Glutaredoxin-3	GLRX3	9.1728	3008700	2	21.9968	21.984	22.6739	22.7555	22.688	22.4998
1.12319	1.4706	P00367-2;P00367-3;P49448;P00367	P00367-2;P00367-3;P49448;P00367	Glutamate dehydrogenase 1, mitochondrial;Glutamate dehydrogenase 2, mitochondrial	GLUD1;GLUD2	2.2318	0	1	22.1847	22.2524	21.37	24.482	23.0371	22.6998
0.854982	-0.545542	P17900	P17900	Ganglioside GM2 activator;Ganglioside GM2 activator isoform short	GM2A	5.3203	11606000	5	23.2815	22.3495	22.4697	22.2306	22.0672	22.1662
0.0746349	-0.104103	P63096-2;P04899-6;P04899-3;P04899-5;P04899-2;P63096;P04899;A0A3B3ITM0;P09471-2;P08754;P04899-4	P63096-2;P04899-6;P04899-3;P04899-5;P04899-2;P63096;P04899;A0A3B3ITM0;P09471-2;P08754;P04899-4	Guanine nucleotide-binding protein G(i) subunit alpha-1;Guanine nucleotide-binding protein G(i) subunit alpha-2;Guanine nucleotide-binding protein G(k) subunit alpha	GNAI1;GNAI2;GNAI3	5.6568	10910000	4	22.3215	21.5742	22.4263	22.7849	21.8262	21.3985
0.0810607	-0.153505	P62873-2;P62873;B1AKQ8;F6X3N5;F6UT28;C9JZN1;C9JIS1;C9JXA5;E7EP32;Q9HAV0;P62879;C9JD14;F5H8J8;F5H100;B3KVK2;F5H0S8;E9PCP0;P16520-2;P16520	P62873-2;P62873;B1AKQ8;F6X3N5;F6UT28;C9JZN1;C9JIS1;C9JXA5;E7EP32;Q9HAV0;P62879	Guanine nucleotide-binding protein G(I)/G(S)/G(T) subunit beta-1;Guanine nucleotide-binding protein subunit beta-4;Guanine nucleotide-binding protein G(I)/G(S)/G(T) subunit beta-2	GNB1;GNB2;GNB4	18.551	108710000	18	22.4687	24.768	23.7832	23.4043	23.5411	23.6139
0.674537	1.02957	Q9UBI6	Q9UBI6	Guanine nucleotide-binding protein G(I)/G(S)/G(O) subunit gamma-12	GNG12	2.4668	2038800	2	20.9593	22.5424	22.721	22.4051	23.0864	23.8199
0.218874	-0.293016	G3V2C9;P59768	G3V2C9;P59768	Guanine nucleotide-binding protein subunit gamma;Guanine nucleotide-binding protein G(I)/G(S)/G(O) subunit gamma-2	GNG2	4.3771	0	2	23.4362	22.2951	22.0874	21.9422	22.9287	22.0688
0.210951	-0.480853	D6RB13;D6RAY7;D6R9P4;D6RFF8;P46926	D6RB13;D6RAY7;D6R9P4;D6RFF8;P46926	Glucosamine-6-phosphate isomerase;Glucosamine-6-phosphate isomerase 1	GNPDA1	6.5166	6514600	2	22.4094	21.2816	23.1707	23.1733	21.3178	20.9281
0.424406	1.55007	Q14789-4;Q14789-3;Q14789;Q14789-2	Q14789-4;Q14789-3;Q14789;Q14789-2	Golgin subfamily B member 1	GOLGB1	1.8825	842390000	2	22.1961	22.0972	22.7083	21.5938	23.2263	26.8317
1.54172	-1.81575	Q8NBJ4-2;Q8NBJ4;F8WAT9;C9JYM4;C9J941	Q8NBJ4-2;Q8NBJ4;F8WAT9;C9JYM4	Golgi membrane protein 1	GOLM1	140.01	120270000	17	24.4907	24.9117	23.955	22.9946	23.2052	21.7105
0.0273381	-0.0171515	P17174-2;P17174	P17174-2;P17174	Aspartate aminotransferase, cytoplasmic	GOT1	8.0431	40924000	11	22.8361	23.2443	23.4635	23.1142	23.3616	23.0166
1.5329	0.885361	H7C410;P35052;H7BZL4;H7C024;P35052-2	H7C410;P35052;H7BZL4;H7C024	Glypican-1;Secreted glypican-1	GPC1	12.568	52547000	10	22.365	21.5312	21.8626	23.0253	22.6748	22.7147
0.163786	-0.549786	Q8N158;A0A0J9YXG7	Q8N158;A0A0J9YXG7	Glypican-2;Secreted glypican-2	GPC2	3.6022	2632000	6	20.9387	22.2683	23.3152	22.0526	19.6129	23.2075
0.474137	-0.564545	H0Y3U6;P51654-2;P51654;P51654-3	H0Y3U6;P51654-2;P51654;P51654-3	Glypican-3;Secreted glypican-3	GPC3	2.7383	13413000	10	23.0563	21.5406	21.5618	21.6316	21.2462	21.5873
1.7554	-0.583904	A0A0A0MTS2;A0A2U3TZU2;P06744;P06744-2;A0A0J9YXP8;A0A0J9YX90;A0A0J9YYH3;A0A2R8Y6C7;K7EQ48;CON__Q3ZBD7	A0A0A0MTS2;A0A2U3TZU2;P06744;P06744-2;A0A0J9YXP8;A0A0J9YX90;A0A0J9YYH3;A0A2R8Y6C7;K7EQ48	Glucose-6-phosphate isomerase	GPI	27.399	81785000	23	23.5391	23.9924	23.5511	23.1184	23.129	23.0835
0.285817	-0.736725	P51674-3;P51674-2;P51674	P51674-3;P51674-2;P51674	Neuronal membrane glycoprotein M6-a	GPM6A	4.9556	4638100	3	21.6526	20.963	22.2646	21.2224	22.3785	19.069
0.154827	-0.245193	P09210;P08263	P09210;P08263	Glutathione S-transferase A2;Glutathione S-transferase A1;Glutathione S-transferase A1, N-terminally processed	GSTA2;GSTA1	2.1795	0	2	23.2493	21.8711	22.5864	23.1796	22.0628	21.7288
0.7209	-0.728983	E9PLF1;E9PHN7;E9PHN6;F6XZQ7;P28161-2;P28161	E9PLF1;E9PHN7;E9PHN6;F6XZQ7;P28161-2;P28161	Glutathione S-transferase Mu 2	GSTM2	2.6814	12404000	7	21.8955	22.7762	22.4325	22.0699	21.9764	20.8708
0.0139053	-0.0796013	P09211;A8MX94;A0A087X2E9;A0A087X243	P09211;A8MX94	Glutathione S-transferase P	GSTP1	289.77	495140000	35	21.9292	26.6684	25.8807	26.3633	22.4048	25.4715
1.14712	-0.907241	Q92522	Q92522	Histone H1x	H1FX	2.3174	3274000	1	22.8985	21.8279	22.9637	21.7022	21.5515	21.7147
0.105254	0.187167	Q71UI9;P0C0S5;C9J0D1;Q71UI9-3;Q71UI9-4;Q71UI9-2;C9J386	Q71UI9;P0C0S5;C9J0D1;Q71UI9-3;Q71UI9-4;Q71UI9-2	Histone H2A.V;Histone H2A.Z;Histone H2A	H2AFV;H2AFZ	2.6685	14131000	3	21.6965	22.3413	22.8997	22.5641	21.5365	23.3984
1.17472	0.422571	K7EK07;Q71DI3;P84243;P68431;K7EMV3;B4DEB1;K7ES00;Q16695;Q5TEC6;Q6NXT2;K7EP01	K7EK07;Q71DI3;P84243;P68431;K7EMV3;B4DEB1;K7ES00;Q16695;Q5TEC6;Q6NXT2;K7EP01	Histone H3;Histone H3.2;Histone H3.3;Histone H3.1;Histone H3.1t;Histone H3.3C	H3F3B;HIST2H3A;H3F3A;HIST1H3A;HIST3H3;HIST2H3PS2;H3F3C	15.708	1089300000	30	26.3804	26.7036	26.6323	27.1567	27.1068	26.7205
0.239542	0.497637	P51858-2;P51858;P51858-3	P51858-2;P51858;P51858-3	Hepatoma-derived growth factor	HDGF	30.406	162290000	26	22.2048	24.8352	24.3271	24.0996	24.5722	24.1883
0.0367779	0.0741215	K7ER15;Q9H0R4-2;Q9H0R4	K7ER15;Q9H0R4-2;Q9H0R4	Haloacid dehalogenase-like hydrolase domain-containing protein 2	HDHD2	1.8183	0	1	21.3588	21.7918	22.9468	21.5055	21.7329	23.0813
0.378385	2.6232	Q5T3Q7;Q9H583	Q5T3Q7;Q9H583	HEAT repeat-containing protein 1;HEAT repeat-containing protein 1, N-terminally processed	HEATR1	3.5427	8267400000	6	22.5295	23.1923	21.4087	22.051	22.2223	30.7266
0.114733	0.229417	P07686;H0Y9B6;Q5URX0	P07686;H0Y9B6;Q5URX0	Beta-hexosaminidase subunit beta;Beta-hexosaminidase subunit beta chain B;Beta-hexosaminidase subunit beta chain A	HEXB	2.7801	14227000	6	22.9209	21.0222	22.1119	21.8614	23.1905	21.6913
0.794929	0.608191	P16401	P16401	Histone H1.5	HIST1H1B	4.638	80481000	8	21.7738	22.5846	21.9726	22.6847	22.2936	23.1773
0.0646236	-0.0757745	P16403;P10412;P16402;P22492;Q02539	P16403;P10412;P16402;P22492;Q02539	Histone H1.2;Histone H1.4;Histone H1.3;Histone H1t;Histone H1.1	HIST1H1C;HIST1H1E;HIST1H1D;HIST1H1T;HIST1H1A	14.843	573810000	13	25.7579	26.8301	26.3781	25.7374	26.3754	26.626
0.243653	0.330739	Q96QV6;P16104;Q8IUE6	Q96QV6;P16104;Q8IUE6	Histone H2A type 1-A;Histone H2AX;Histone H2A type 2-B	HIST1H2AA;H2AFX;HIST2H2AB	7.062	0	3	21.7532	22.8295	22.7177	23.5386	22.6259	22.128
0.262378	0.183702	Q93077;Q7L7L0;P04908;A0A0U1RR32;A0A0U1RRH7;Q99878;Q96KK5;Q9BTM1;Q16777;Q6FI13;P20671;P0C0S8;A0A3B3IS11;Q9BTM1-2;H0YFX9;Q71UI9-5	Q93077;Q7L7L0;P04908;A0A0U1RR32;A0A0U1RRH7;Q99878;Q96KK5;Q9BTM1;Q16777;Q6FI13;P20671;P0C0S8;A0A3B3IS11;Q9BTM1-2	Histone H2A type 1-C;Histone H2A type 3;Histone H2A type 1-B/E;Histone H2A type 1-J;Histone H2A type 1-H;Histone H2A.J;Histone H2A type 2-C;Histone H2A type 2-A;Histone H2A type 1-D;Histone H2A type 1	HIST1H2AC;HIST3H2A;HIST1H2AB;HIST1H2AJ;HIST1H2AH;H2AFJ;HIST2H2AC;HIST2H2AA3;HIST1H2AD;HIST1H2AG	122.31	2693500000	44	27.6948	28.5612	27.897	28.3981	28.2449	28.0611
0.340236	-0.22929	U3KQK0;Q99879;Q99877;Q93079;Q5QNW6;P62807;P58876;P57053;O60814;Q5QNW6-2;Q99880;Q16778;P33778;P23527;P06899;Q8N257;A0A2R8Y619;Q96A08	U3KQK0;Q99879;Q99877;Q93079;Q5QNW6;P62807;P58876;P57053;O60814;Q5QNW6-2;Q99880;Q16778;P33778;P23527;P06899	Histone H2B;Histone H2B type 1-M;Histone H2B type 1-N;Histone H2B type 1-H;Histone H2B type 2-F;Histone H2B type 1-C/E/F/G/I;Histone H2B type 1-D;Histone H2B type F-S;Histone H2B type 1-K;Histone H2B type 1-L;Histone H2B type 2-E;Histone H2B type 1-B;Histone H2B type 1-O;Histone H2B type 1-J	HIST1H2BN;HIST1H2BM;HIST1H2BH;HIST2H2BF;HIST1H2BC;HIST1H2BD;H2BFS;HIST1H2BK;HIST1H2BL;HIST2H2BE;HIST1H2BB;HIST1H2BO;HIST1H2BJ	19.121	2080800000	23	27.3853	28.2091	27.5742	27.3424	27.3972	27.7412
0.0422138	-0.0512784	P62805	P62805	Histone H4	HIST1H4A	25.265	1180800000	45	26.5011	27.7422	26.8335	27.264	26.6341	27.0249
1.13474	-1.73012	P17096-2;P17096	P17096-2;P17096	High mobility group protein HMG-I/HMG-Y	HMGA1	6.1887	3279400	3	22.3855	23.4689	23.0311	22.2097	20.016	21.4694
0.507533	0.563791	F5H2U8;F5H2A4;F5H6H0;P52926-3;P52926-6;P52926-4;P52926-5;P52926-2;P52926	F5H2U8;F5H2A4;F5H6H0;P52926-3;P52926-6;P52926-4;P52926-5;P52926-2;P52926	High mobility group protein HMGI-C	HMGA2	33.376	13634000	11	22.1857	21.9679	22.7439	23.4418	23.1193	22.0277
0.37523	1.39536	Q5T7C4;P09429;B2RPK0	Q5T7C4;P09429	High mobility group protein B1	HMGB1	38.386	405860000	32	21.3016	26.4163	25.3486	25.8597	25.6135	25.7794
0.0587623	-0.145927	P26583;D6R9A6	P26583;D6R9A6	High mobility group protein B2	HMGB2	17.952	67447000	16	21.9527	23.8597	23.3716	21.6341	23.6227	23.4895
0.0266463	-0.097079	P05204	P05204	Non-histone chromosomal protein HMG-17	HMGN2	25.112	32063000	12	24.0208	20.4845	21.4083	21.5833	23.0449	20.9941
0.657862	-0.780933	A0A087WZE9;Q15651-2;Q15651	A0A087WZE9;Q15651-2;Q15651	High mobility group nucleosome-binding domain-containing protein 3	HMGN3	2.1415	12621000	5	21.8186	23.1521	22.8755	21.5743	21.3985	22.5306
0.915273	-0.430062	F8W6I7;P09651-3;P09651-2;P09651;F8VZ49;Q32P51;F8VTQ5;F8VYN5;F8W646;H0YH80;A0A2R8Y4L2	F8W6I7;P09651-3;P09651-2;P09651;F8VZ49;Q32P51;F8VTQ5;F8VYN5;F8W646;H0YH80;A0A2R8Y4L2	Heterogeneous nuclear ribonucleoprotein A1;Heterogeneous nuclear ribonucleoprotein A1, N-terminally processed;Heterogeneous nuclear ribonucleoprotein A1-like 2	HNRNPA1;HNRNPA1L2	75.694	251350000	65	25.1327	25.391	24.9786	24.9159	24.9257	24.3705
0.0169805	0.0219269	P22626-2;P22626;A0A087WUI2	P22626-2;P22626;A0A087WUI2	Heterogeneous nuclear ribonucleoproteins A2/B1	HNRNPA2B1	37.228	271470000	37	24.7826	25.2704	24.6014	25.2904	25.2816	24.1483
0.86584	-1.65536	P51991;P51991-2;H7C1J8	P51991;P51991-2	Heterogeneous nuclear ribonucleoprotein A3	HNRNPA3	5.8361	5475500	4	23.5226	23.5333	22.2522	22.2975	19.8873	22.1574
0.318177	0.385995	D6R9P3;D6RD18;D6RBZ0;Q99729-3;Q99729-2;Q99729-4;Q99729	D6R9P3;D6RD18;D6RBZ0;Q99729-3;Q99729-2;Q99729-4;Q99729	Heterogeneous nuclear ribonucleoprotein A/B	HNRNPAB	6.1151	103130000	21	22.6197	24.0978	23.8952	24.2608	23.8698	23.64
0.205656	0.457464	G3V576;G3V4W0;B4DY08;B2R5W2;G3V4C1;G3V2Q1;P07910-4;P07910-2;P07910;G3V5X6;G3V3K6;G3V251;B4DSU6;G3V555;G3V575;G3V4M8	G3V576;G3V4W0;B4DY08;B2R5W2;G3V4C1;G3V2Q1;P07910-4;P07910-2;P07910;G3V5X6;G3V3K6;G3V251;B4DSU6;G3V555;G3V575;G3V4M8	Heterogeneous nuclear ribonucleoproteins C1/C2	HNRNPC	39.749	121180000	21	21.8745	24.6531	24.0588	23.6993	24.2496	24.0098
0.388531	-0.991873	H0Y8G5;Q14103-3;Q14103;H0YA96;D6RAF8;Q14103-4;Q14103-2;D6RF44;D6RD83;D6RBQ9	H0Y8G5;Q14103-3;Q14103;H0YA96;D6RAF8;Q14103-4;Q14103-2;D6RF44;D6RD83;D6RBQ9	Heterogeneous nuclear ribonucleoprotein D0	HNRNPD	112.03	236600000	29	23.9792	26.0031	24.7677	25.1221	24.4911	22.1613
0.435871	-0.884053	A0A087WUK2;O14979-3;O14979-2;O14979	A0A087WUK2;O14979-3;O14979-2;O14979	Heterogeneous nuclear ribonucleoprotein D-like	HNRNPDL	2.4289	14805000	3	23.9035	22.858	21.8478	23.1655	20.9894	21.8023
0.381638	-0.5037	E7EQJ0;D6RAM1;E5RGV0;D6R9T0;D6RFM3;D6RIT2;D6RIU0;D6RDU3;D6RJ04;D6RIH9;D6RBM0;E9PCY7;G8JLB6;P31943;E5RJ94;D6R9D3;D6RF17;D6RDL0;E5RGH4;H0YAQ2;E7EN40;P55795	E7EQJ0;D6RAM1;E5RGV0;D6R9T0;D6RFM3;D6RIT2;D6RIU0;D6RDU3;D6RJ04;D6RIH9;D6RBM0;E9PCY7;G8JLB6;P31943;E5RJ94;D6R9D3;D6RF17;D6RDL0;E5RGH4;H0YAQ2;E7EN40;P55795	Heterogeneous nuclear ribonucleoprotein H;Heterogeneous nuclear ribonucleoprotein H, N-terminally processed;Heterogeneous nuclear ribonucleoprotein H2	HNRNPH1;HNRNPH2	61.619	3208700	7	22.7822	23.0732	23.6822	23.5202	21.832	22.6743
0.231433	-0.365946	P61978-3;P61978;P61978-2;Q5T6W2;S4R457;S4R359	P61978-3;P61978;P61978-2;Q5T6W2	Heterogeneous nuclear ribonucleoprotein K	HNRNPK	102.78	1041000000	34	28.0963	26.2032	27.1613	26.2762	26.7945	27.2922
0.0358912	0.128421	P14866	P14866	Heterogeneous nuclear ribonucleoprotein L	HNRNPL	6.2852	4742100	5	23.1341	22.0412	21.5512	20.1678	23.1452	23.7988
0.607922	-0.763383	A0A1X7SBS1;A0A1W2PPS1;Q00839-2;Q00839;A0A1W2PP35;A0A1W2PQ74;A0A1W2PQL0;A0A1W2PP34;A0A1W2PPL4;A0A1W2PPH7;Q5RI18;A0A1W2PRZ7;A0A1W2PPE9;A0A1W2PNG3;A0A1W2PRI6;A0A1W2PP22;A0A1W2PQD4	A0A1X7SBS1;A0A1W2PPS1;Q00839-2;Q00839;A0A1W2PP35;A0A1W2PQ74;A0A1W2PQL0;A0A1W2PP34;A0A1W2PPL4;A0A1W2PPH7;Q5RI18	Heterogeneous nuclear ribonucleoprotein U	HNRNPU	27.717	68600000	23	22.6491	24.3977	23.5976	23.1096	22.2973	22.9474
0.816912	-0.686444	A0A087WU08;A0A0C4DGL8;J3QLC9;J3QR68;H0Y300;P00738-2;P00738;H3BS21;A0A0A0MRD9;P00739;P00739-2	A0A087WU08;A0A0C4DGL8;J3QLC9;J3QR68;H0Y300;P00738-2;P00738;H3BS21;A0A0A0MRD9;P00739;P00739-2	Haptoglobin;Haptoglobin alpha chain;Haptoglobin beta chain;Haptoglobin-related protein	HP;HPR	6.306	0	4	23.211	22.9885	22.5987	21.8243	21.9834	22.9311
0.122178	0.0431512	P02790;Q9BS19	P02790;Q9BS19	Hemopexin	HPX	323.31	26379000000	408	31.2585	31.6559	31.4578	31.4434	31.6185	31.4398
0.217969	-0.647316	O75506	O75506	Heat shock factor-binding protein 1	HSBP1	10.874	6663700	6	21.3369	22.0877	21.508	22.8959	21.1196	18.9752
0.576089	0.350911	P07900;P07900-2;Q14568;G3V2J8;Q58FF6;Q58FG0;Q58FG1	P07900;P07900-2	Heat shock protein HSP 90-alpha	HSP90AA1	306.98	1917900000	150	27.435	27.9327	27.4619	28.2049	28.1513	27.5262
0.184055	0.0735448	P08238;Q58FF7	P08238	Heat shock protein HSP 90-beta	HSP90AB1	96.415	335500000	69	24.9855	25.4489	25.2228	25.438	25.2098	25.2301
0.0489238	0.0690562	Q58FF8	Q58FF8	Putative heat shock protein HSP 90-beta 2	HSP90AB2P	3.5264	38790000	8	21.9239	22.6373	22.2522	21.4731	22.8818	22.6655
0.527059	-0.387008	P14625;Q96GW1;A0A1W2PRR1;F8W026;H0YIV0	P14625;Q96GW1;A0A1W2PRR1	Endoplasmin	HSP90B1	71.194	90651000	40	24.3554	23.6971	23.3741	23.6824	23.402	23.1812
0.0222597	0.0432021	A0A0G2JIW1;P0DMV8-2;P0DMV9;P0DMV8;V9GZ37	A0A0G2JIW1;P0DMV8-2;P0DMV9;P0DMV8;V9GZ37	Heat shock 70 kDa protein 1A;Heat shock 70 kDa protein 1B	HSPA1A;HSPA1B	48.892	32116000	7	21.7956	23.3836	21.2619	22.0792	22.0669	22.4245
0.765368	0.819784	P34932;A0A087WTS8;A0A087WYC1;P34932-2	P34932;A0A087WTS8;A0A087WYC1	Heat shock 70 kDa protein 4	HSPA4	3.4115	27586000	5	21.0645	22.371	22.3805	22.9267	23.0412	22.3074
0.26687	0.196621	P11021	P11021	78 kDa glucose-regulated protein	HSPA5	36.178	121480000	37	23.4468	24.2474	24.1728	24.4065	23.8981	24.1524
0.726451	-0.224606	E9PKE3;P11142;P11142-2;E9PNE6;E9PN89;E9PLF4;E9PQQ4;E9PQK7;E9PK54;E9PN25;E9PPY6;A8K7Q2;P54652;E9PI65;E9PS65;E9PM13;P17066	E9PKE3;P11142;P11142-2;E9PNE6;E9PN89;E9PLF4	Heat shock cognate 71 kDa protein	HSPA8	188.2	610000000	79	26.272	26.3215	26.551	26.0412	26.0476	26.3818
0.42592	0.29253	P04792;C9J3N8;F8WE04	P04792;C9J3N8;F8WE04	Heat shock protein beta-1	HSPB1	5.1	50149000	13	21.622	22.5362	22.4333	22.5712	22.4004	22.4974
0.508181	-0.332009	P10809;E7ESH4;E7EXB4;C9JL25;P10809-2;C9J0S9;C9JL19;C9JCQ4	P10809	60 kDa heat shock protein, mitochondrial	HSPD1	175.85	231650000	68	25.5977	24.9627	24.8608	24.7656	25.1208	24.5388
0.241876	0.626216	P61604;B8ZZ54;B8ZZL8;S4R3N1	P61604;B8ZZ54;B8ZZL8	10 kDa heat shock protein, mitochondrial	HSPE1	51.131	61330000	19	22.9991	19.9884	22.121	21.4834	23.1948	22.3088
0.809915	-0.646597	P98160;A0A3B3IT11	P98160	Basement membrane-specific heparan sulfate proteoglycan core protein;Endorepellin;LG3 peptide	HSPG2	19.41	175240000	29	24.6606	24.3422	24.9228	23.3373	24.3163	24.3322
0.180295	0.235828	H0Y7G9;A0A3B3IU24;Q92743	H0Y7G9;A0A3B3IU24;Q92743	Serine protease HTRA1	HTRA1	1.8522	0	1	22.7042	21.2763	21.995	22.3182	21.7061	22.6586
0.589685	0.89083	A0A087X054;Q9Y4L1	A0A087X054;Q9Y4L1	Hypoxia up-regulated protein 1	HYOU1	2.137	8152000	2	22.7443	22.2567	21.4838	22.0949	24.0548	23.0075
0.630058	0.22327	O75874;C9JJE5;C9JLU6;C9J4N6	O75874	Isocitrate dehydrogenase [NADP] cytoplasmic	IDH1	152.33	313810000	58	25.0424	25.4629	25.2232	25.2599	25.5751	25.5633
1.41929	-0.44095	H0YL11;P48735-2;P48735	H0YL11;P48735-2;P48735	Isocitrate dehydrogenase [NADP], mitochondrial	IDH2	6.4068	21215000	5	22.6957	22.518	22.525	21.897	22.1654	22.3535
1.25466	-0.649844	P01344;P01344-2;P01344-3	P01344;P01344-2;P01344-3	Insulin-like growth factor II;Insulin-like growth factor II;Insulin-like growth factor II Ala-25 Del;Preptin	IGF2	31.901	112540000	18	24.234	23.6799	24.3738	23.3206	23.3332	23.6844
0.196224	0.0845153	P18065;C9JMY1;C9JW52;H7C1H0	P18065;C9JMY1	Insulin-like growth factor-binding protein 2	IGFBP2	83.965	1388600000	95	27.092	27.4024	27.6095	27.4594	27.3295	27.5686
0.295757	0.0940806	H0Y485;H0Y5K2;B3KWK7;A6XND1;A6XND0;P17936;P17936-2;C9JMX4	H0Y485;H0Y5K2;B3KWK7;A6XND1;A6XND0;P17936;P17936-2;C9JMX4	Insulin-like growth factor-binding protein 3	IGFBP3	78.349	454740000	17	25.8914	25.6536	26.0246	26.0891	25.8673	25.8954
0.359056	-1.00764	P22692-2;P22692	P22692-2;P22692	Insulin-like growth factor-binding protein 4	IGFBP4	2.0243	12661000	3	23.4737	22.4472	22.3045	22.2236	23.3645	19.6142
0.736838	0.441972	P24593;C9JXX4	P24593;C9JXX4	Insulin-like growth factor-binding protein 5	IGFBP5	184.23	333150000	60	24.9724	25.0945	25.2241	25.8434	25.7629	25.0105
0.252443	0.391371	Q16270-2;Q16270	Q16270-2;Q16270	Insulin-like growth factor-binding protein 7	IGFBP7	22.787	89849000	21	23.3261	23.0431	21.7357	23.3385	23.5786	22.3619
0.143877	0.196381	Q8WX77	Q8WX77	Insulin-like growth factor-binding protein-like 1	IGFBPL1	98.146	825000000	45	26.4988	26.9483	25.8644	25.8409	27.0754	26.9842
0.749914	1.51536	A0A286YEY1;P01876;A0A0G2JMB2;A0A286YEY5;P01877	A0A286YEY1;P01876;A0A0G2JMB2	Ig alpha-1 chain C region	IGHA1	15.905	155880000	23	23.9547	21.3426	24.1506	25.0679	24.5307	24.3953
0.395704	-0.147273	A0A0A0MS08;P01857;A0A0A0MS07	A0A0A0MS08;P01857;A0A0A0MS07	Ig gamma-1 chain C region	IGHG1	133.44	274140000	25	25.0558	25.4481	25.3156	25.2333	25.2326	24.9118
0.411753	0.277552	P01834	P01834	Ig kappa chain C region	IGKC	124.64	330570000	42	24.544	25.3514	24.9243	25.4862	25.2531	24.9131
0.0699695	0.043204	P0DOY3;P0DOY2;A0A0B4J231;P0CG04;P0CF74;B9A064	P0DOY3;P0DOY2;A0A0B4J231;P0CG04;P0CF74;B9A064	Ig lambda-1 chain C regions;Ig lambda-6 chain C region;Immunoglobulin lambda-like polypeptide 5	IGLL5;IGLC1;IGLC6	16.301	32898000	18	21.7802	22.0306	21.9474	22.3666	21.7958	21.7254
0.180117	0.229411	B4DY09;Q12905;X6R6Z1;A0A0A0MRL0	B4DY09;Q12905;X6R6Z1	Interleukin enhancer-binding factor 2	ILF2	48.969	39340000	16	22.3041	22.1856	22.2814	21.6789	22.4308	23.3496
0.89023	0.833413	Q12906-5;Q12906-4;Q12906-2;Q12906-6;Q12906-3;Q12906;Q12906-7;K7EKJ9;K7ERM6;K7ENK6;K7EM82;K7EJ09;K7ER69;Q96SI9-2;Q96SI9;K7EQ75;K7EQR9	Q12906-5;Q12906-4;Q12906-2;Q12906-6;Q12906-3;Q12906;Q12906-7;K7EKJ9	Interleukin enhancer-binding factor 3	ILF3	10.918	64059000	18	22.5945	22.4468	22.6266	24.0438	23.5529	22.5714
0.00999035	-0.10909	A6XGL2;P01308;C9JNR5;F8WCM5	A6XGL2;P01308;C9JNR5;F8WCM5	Insulin;Insulin B chain;Insulin A chain;Insulin, isoform 2	INS;INS-IGF2	4.6562	5521500000	13	22.3105	30.757	29.2131	29.5097	30.0929	22.3507
0.27547	0.387294	O00410;H0Y8C6;O00410-2;O00410-3;C9JZD8;E7EQT5;E7ETV3	O00410;H0Y8C6;O00410-2;O00410-3	Importin-5	IPO5	23.437	19535000	14	21.909	21.7804	20.755	21.431	22.7295	21.4456
2.5508	1.17045	A0A0J9YXZ5;P46940	A0A0J9YXZ5;P46940	Ras GTPase-activating-like protein IQGAP1	IQGAP1	1.9938	4082900	0	22.1961	21.8942	21.7751	22.9866	23.0099	23.3802
0.369206	-0.926069	O14498;H0YN67;H0YL90	O14498;H0YN67;H0YL90	Immunoglobulin superfamily containing leucine-rich repeat protein	ISLR	23.994	28332000	9	23.4	22.744	23.0662	23.8036	20.251	22.3775
0.00831008	0.00456429	B7ZKJ8;Q14624-3;Q14624-2;Q14624;H7C0L5;Q14624-4	B7ZKJ8;Q14624-3;Q14624-2;Q14624;H7C0L5;Q14624-4	Inter-alpha-trypsin inhibitor heavy chain H4;70 kDa inter-alpha-trypsin inhibitor heavy chain H4;35 kDa inter-alpha-trypsin inhibitor heavy chain H4	ITIH4	131.5	1436900000	72	27.2807	27.6938	27.2406	27.4105	27.596	27.2223
0.0228555	0.081412	Q08881	Q08881	Tyrosine-protein kinase ITK/TSK	ITK	1.9748	232120000	2	21.9642	22.7721	23.441	22.3095	21.1813	24.9308
0.157886	-0.269589	A0A3B3IUC0;Q9Y287	A0A3B3IUC0;Q9Y287	Integral membrane protein 2B;BRI2, membrane form;BRI2 intracellular domain;BRI2C, soluble form;Bri23 peptide	ITM2B	2.0971	0	1	21.8658	23.1942	21.8099	21.8084	21.3643	22.8885
0.543478	0.947443	Q07666-3;Q07666-2;Q07666	Q07666-3;Q07666-2;Q07666	KH domain-containing, RNA-binding, signal transduction-associated protein 1	KHDRBS1	30.043	24223000	8	23.182	21.2396	21.7559	22.7141	23.9917	22.314
0.16318	-0.431118	H7C4F6;O00629	H7C4F6;O00629	Importin subunit alpha-3	KPNA4	3.3331	7193700	5	22.2069	22.1027	21.8488	23.24	21.7946	19.8305
0.0770396	-0.0393111	Q14974;J3QR48;Q14974-2	Q14974;J3QR48	Importin subunit beta-1	KPNB1	15.546	72322000	18	23.2843	23.2262	23.1476	23.4783	22.8717	23.1902
0.533394	-0.37578	F8VZY9;P05783;CON__H-INV:HIT000015463	F8VZY9;P05783	Keratin, type I cytoskeletal 18	KRT18	13.755	74548000	19	23.5413	22.8679	23.7243	23.0457	22.6897	23.2708
2.47437	0.74456	P25391	P25391	Laminin subunit alpha-1	LAMA1	2.4504	13502000	5	21.355	21.5343	21.5635	22.3761	22.0384	22.2721
1.51911	1.61355	G3XAI2;P07942;E7EPA6	G3XAI2;P07942	Laminin subunit beta-1	LAMB1	90.029	48287000	27	21.0511	22.3254	22.5146	23.5737	23.8769	23.2812
0.417233	0.499825	P11047;Q9Y6N6	P11047	Laminin subunit gamma-1	LAMC1	3.7037	13552000	5	22.0747	22.2011	21.6179	21.8246	22.1683	23.4003
0.474774	0.550791	F6S2S5;Q14847;Q14847-2;K7ESD6;C9J9W2;O76041-2	F6S2S5;Q14847;Q14847-2;K7ESD6;C9J9W2;O76041-2	LIM and SH3 domain protein 1	LASP1	9.055	27672000	18	21.6489	21.486	21.7442	22.689	22.6601	21.1824
0.552517	-0.331842	P00338;P00338-3;P00338-4;P00338-5;P00338-2;F5GXY2;F5H5J4;F5H6W8;F5GXH2;F5GYU2;F5GZQ4;F5H8H6;F5GXC7;F5GWW2;F5GXU1	P00338;P00338-3;P00338-4;P00338-5;P00338-2;F5GXY2	L-lactate dehydrogenase A chain	LDHA	66.116	327230000	65	25.7092	25.7397	25.4802	25.5418	25.586	24.8057
0.562683	0.45231	P07195;A0A3B3IS95;A8MW50;C9J7H8;F5H793;F5H5G7;F5H155;A0A087WUM2;G3XAP5;F5H245;Q6ZMR3;P07864	P07195;A0A3B3IS95;A8MW50	L-lactate dehydrogenase B chain;L-lactate dehydrogenase	LDHB	323.31	1872600000	100	26.8348	27.8939	27.5033	28.1158	27.9539	27.5193
0.147957	0.373311	P09382;F8WEI7	P09382	Galectin-1	LGALS1	6.0248	105080000	17	21.8726	23.9636	24.7776	24.6416	23.5398	23.5523
1.982	-0.866173	Q08380;K7ESM3;K7EKQ5;K7EP36;K7EJY8;K7EQT9;K7ES75;K7EN99;K7ERZ6;K7EJD3	Q08380	Galectin-3-binding protein	LGALS3BP	81.349	675250000	56	27.3043	27.123	26.8196	26.4491	26.1893	26.0099
0.421209	-0.799887	P49257	P49257	Protein ERGIC-53	LMAN1	1.9463	7842000	1	22.3951	22.12	22.5271	20.0521	22.7917	21.7986
0.00977935	-0.0243829	D6RBV2;Q12907;D6RDX1;D6RIU4;D6RBH1	D6RBV2;Q12907;D6RDX1;D6RIU4	Vesicular integral-membrane protein VIP36	LMAN2	16.583	58480000	10	24.3689	22.1079	23.4066	23.5467	23.9553	22.3084
0.0353856	0.0676924	P02545-2;P02545-6;P02545-3;P02545;Q3BDU5;Q5TCI8;P02545-5;P02545-4;H0YAB0;A0A0C4DGC5	P02545-2;P02545-6;P02545-3;P02545;Q3BDU5;Q5TCI8;P02545-5;P02545-4	Prelamin-A/C;Lamin-A/C	LMNA	11.249	48294000	17	22.0956	22.8639	22.8187	23.6944	21.6243	22.6625
0.237387	0.173155	P20700;E9PBF6;A0A0D9SFY5;A0A0D9SFE5	P20700;E9PBF6	Lamin-B1	LMNB1	26.035	135790000	28	23.3889	24.286	24.0412	24.2711	24.0482	23.9163
0.200521	-0.278589	Q03252	Q03252	Lamin-B2	LMNB2	8.592	16582000	7	23.2555	22.227	23.1168	21.9301	23.3894	22.4441
0.575519	1.04214	B8ZZF8;Q9Y4Y9	B8ZZF8;Q9Y4Y9	U6 snRNA-associated Sm-like protein LSm5	LSM5	2.1247	14532000	7	20.3764	20.7106	22.9291	22.198	22.4704	22.4742
0.0677895	-0.0542634	P09960-3;P09960-2;P09960-4;P09960	P09960-3;P09960-2;P09960-4;P09960	Leukotriene A-4 hydrolase	LTA4H	7.2774	29498000	7	22.5183	22.9287	22.6881	23.0669	22.1959	22.7095
0.674067	-0.270023	P51884;CON__Q05443	P51884	Lumican	LUM	323.31	10310000000	140	30.7825	30.2222	30.4816	30.3406	30.271	30.0646
0.977513	-0.752136	P33908;P33908-2	P33908;P33908-2	Mannosyl-oligosaccharide 1,2-alpha-mannosidase IA	MAN1A1	113.88	257710000	42	25.8617	25.1159	25.1862	24.7956	25.0046	24.1073
0.906623	1.30211	P46821;D6RA32;D6RA40	P46821;D6RA32	Microtubule-associated protein 1B;MAP1B heavy chain;MAP1 light chain LC1	MAP1B	141.24	175090000	61	22.3273	24.5462	23.5262	24.4133	24.8072	25.0855
0.624186	1.14108	F5H1X6;F5H4R1;J3KNB8;F5H538;Q9Y6R4-2;Q9Y6R4	F5H1X6;F5H4R1;J3KNB8;F5H538;Q9Y6R4-2;Q9Y6R4	Mitogen-activated protein kinase kinase kinase 4	MAP3K4	2.4837	66072000	6	21.2408	22.8397	20.9722	22.0151	22.5112	23.9497
0.0159921	-0.0384159	Q15691	Q15691	Microtubule-associated protein RP/EB family member 1	MAPRE1	3.1259	11403000	3	22.9477	21.6903	23.3983	22.392	21.7283	23.8007
0.519783	0.54273	P29966	P29966	Myristoylated alanine-rich C-kinase substrate	MARCKS	246.8	264180000	46	24.3074	24.9498	24.3006	25.6071	25.3082	24.2708
1.55852	1.07767	P49006	P49006	MARCKS-related protein	MARCKSL1	16.152	11029000	1	21.2551	22.2287	21.5401	22.6497	22.5905	23.0168
0.111461	0.185488	P48740-4;P48740-2;F8W876;P48740-3;P48740	P48740-4;P48740-2;F8W876;P48740-3;P48740	Mannan-binding lectin serine protease 1;Mannan-binding lectin serine protease 1 heavy chain;Mannan-binding lectin serine protease 1 light chain	MASP1	11.891	18099000	8	21.3705	22.7607	22.3112	22.9543	21.4772	22.5674
0.475194	0.827599	P40925;P40925-3;B9A041;P40925-2;B8ZZ51;C9JF79;C9JRL4;C9JLV6	P40925;P40925-3;B9A041;P40925-2;B8ZZ51;C9JF79	Malate dehydrogenase, cytoplasmic;Malate dehydrogenase	MDH1	25.818	197280000	32	22.4497	24.508	24.5777	25.0377	24.8781	24.1024
0.116559	0.183364	P40926-2;P40926;G3XAL0	P40926-2;P40926;G3XAL0	Malate dehydrogenase, mitochondrial;Malate dehydrogenase	MDH2	29.749	48333000	12	23.2179	22.4324	22.5636	23.8973	22.7337	22.1329
0.430394	-0.876996	E9PPJ5;E9PLM6;P21741-2;P21741	E9PPJ5;E9PLM6;P21741-2;P21741	Midkine	MDK	3.0402	7739200	5	22.5689	23.1051	21.2167	21.9952	22.1731	20.0915
0.0556768	-0.0394503	K7ES70;P55083;P55083-2	K7ES70;P55083;P55083-2	Microfibril-associated glycoprotein 4	MFAP4	95.262	1232000000	38	27.4963	27.1367	26.9745	27.404	27.2968	26.7884
0.0799177	-0.178969	P08493;P08493-2	P08493;P08493-2	Matrix Gla protein	MGP	22.253	181360000	10	23.0192	22.1053	23.0966	22.1925	21.5346	23.957
0.768305	1.69833	A0A0A0MTD5;Q8IYU8	A0A0A0MTD5;Q8IYU8	Calcium uptake protein 2, mitochondrial	MICU2	1.9093	318750000	7	22.3829	22.8816	20.7529	22.7731	23.0662	25.2731
0.55118	-0.234942	P14174	P14174	Macrophage migration inhibitory factor	MIF	84.964	998740000	37	26.706	27.0675	27.1545	26.9785	26.5331	26.7116
0.157251	-0.0961889	P08253;P08253-3;P08253-2;H3BR66;H3BS34;H3BV48	P08253;P08253-3;P08253-2	72 kDa type IV collagenase;PEX	MMP2	65.037	443270000	45	26.0747	25.708	25.6972	25.3451	25.9244	25.9217
0.0266836	0.0429694	Q9UBG0	Q9UBG0	C-type mannose receptor 2	MRC2	4.0934	14557000	6	21.5399	21.9466	21.7962	21.6295	22.791	20.9911
0.476279	0.71354	P26038;V9GZ54	P26038	Moesin	MSN	55.22	63021000	18	22.924	21.2634	23.2693	23.5429	22.857	23.1974
0.747791	-0.528913	J3KTJ1;J3QRS3;P24844-2;P19105;P24844;O14950	J3KTJ1;J3QRS3;P24844-2;P19105;P24844;O14950	Myosin regulatory light polypeptide 9;Myosin regulatory light chain 12A;Myosin regulatory light chain 12B	MYL12A;MYL9;MYL12B	15.934	7199500	9	23.3124	22.5726	22.615	21.9265	22.3018	22.685
0.11056	-0.119923	F8VPF3;F8W1R7;J3KND3;G8JLA2;G3V1V0;B7Z6Z4;P60660-2;P60660;F8VZU9;G3V1Y7;F8W1I5;F8W180;P14649	F8VPF3;F8W1R7;J3KND3;G8JLA2;G3V1V0;B7Z6Z4;P60660-2;P60660;F8VZU9;G3V1Y7;F8W1I5;F8W180;P14649	Myosin light polypeptide 6;Myosin light chain 6B	MYL6;MYL6B	39.627	103430000	12	23.9524	24.5549	23.5703	23.4502	24.3792	23.8885
0.581202	1.16967	H3BML9;H3BN54;H3BPK4;Q96A32	H3BML9;H3BN54;H3BPK4;Q96A32	Myosin regulatory light chain 2, skeletal muscle isoform	MYLPF	3.726	829070	2	21.9198	19.696	22.3889	22.0984	23.1783	22.237
0.00564348	0.0206738	F8VZJ2;H0YHX9;Q13765;E9PAV3-2;E9PAV3	F8VZJ2;H0YHX9;Q13765;E9PAV3-2;E9PAV3	Nascent polypeptide-associated complex subunit alpha;Nascent polypeptide-associated complex subunit alpha, muscle-specific form	NACA	7.2955	15339000	6	22.5712	21.6412	22.3812	23.4635	23.3056	19.8865
1.13575	-0.972784	H0YH88;H0YHC3;F8W020;F8W118;F8VXI6;F8VUX1;F8VY35;F8VV59;F8W543;B7Z9C2;F8W0J6;F5H4R6;H0YIV4;P55209-3;P55209-2;P55209	H0YH88;H0YHC3;F8W020;F8W118;F8VXI6;F8VUX1;F8VY35;F8VV59;F8W543;B7Z9C2;F8W0J6;F5H4R6;H0YIV4;P55209-3;P55209-2;P55209	Nucleosome assembly protein 1-like 1	NAP1L1	3.0398	44758000	8	22.2558	23.0195	23.294	21.3755	22.1983	22.0772
0.683707	-0.80364	A8MXH2;C9JZI7;Q99733;Q99733-2;E9PNW0;E9PJJ2;E9PS34;E9PNJ7;E9PKT8;C9J6D1;H0YCI4	A8MXH2;C9JZI7;Q99733;Q99733-2;E9PNW0;E9PJJ2;E9PS34;E9PNJ7;E9PKT8;C9J6D1;H0YCI4	Nucleosome assembly protein 1-like 4	NAP1L4	31.733	5250800	7	22.594	23.1438	22.364	22.5621	20.9604	22.1684
0.130703	-0.240854	P49321;P49321-3;E9PPR5;P49321-2;P49321-4;E9PPQ8;E9PI86;Q5T624;E9PNB5;H0YDS9;E9PRH9;H0YF33	P49321;P49321-3;E9PPR5;P49321-2;P49321-4	Nuclear autoantigenic sperm protein	NASP	4.6822	5620700	5	22.4631	21.8439	21.7892	20.7874	22.9864	21.5999
0.222619	0.324114	A0A087X1V2;A0A087WVU1;A0A0D9SF98;A0A087WWJ5;H7BYX6;A0A087WTE4;A0A087WTF6;A0A087WX77;A0A087WWD4;A0A087WV75;P13591-4;P13591-3;P13591-1;P13591;A0A0C4DGS4;P13591-5;A0A087WZS4	A0A087X1V2;A0A087WVU1;A0A0D9SF98;A0A087WWJ5;H7BYX6;A0A087WTE4;A0A087WTF6;A0A087WX77;A0A087WWD4;A0A087WV75;P13591-4;P13591-3;P13591-1;P13591;A0A0C4DGS4;P13591-5	Neural cell adhesion molecule 1	NCAM1	6.158	16875000	10	21.4406	20.919	22.8156	21.9411	22.1048	22.1016
0.24193	0.636431	O14594	O14594	Neurocan core protein	NCAN	7.5012	78073000	13	22.0216	24.2002	21.1893	22.2337	23.0509	24.0357
0.148369	-0.266732	P19338;H7BY16;C9JYW2;C9JLB1;C9J1H7;C9JWL1	P19338;H7BY16	Nucleolin	NCL	267.41	408070000	67	24.856	26.3759	25.8441	24.5062	25.545	26.2248
0.577212	0.512558	F8W1A2;F8VVB6;Q99435-4;Q99435;Q99435-2;Q99435-3;F8VXR5;F8VRQ0;H0YIT4;F8VZ72	F8W1A2;F8VVB6;Q99435-4;Q99435;Q99435-2;Q99435-3	Protein kinase C-binding protein NELL2	NELL2	48.876	42659000	22	21.5319	22.6934	22.2876	22.4827	22.4814	23.0866
0.957734	-0.950422	Q92859-3;Q92859-2;Q92859-4;Q92859;Q59FP8	Q92859-3;Q92859-2;Q92859-4;Q92859	Neogenin	NEO1	9.4672	7147700	8	23.3739	23.0767	21.8799	21.967	21.6708	21.8414
1.29674	-1.50295	P14543-2;P14543	P14543-2;P14543	Nidogen-1	NID1	10.624	13715000	4	22.6873	23.033	23.625	20.7106	22.2882	21.8377
0.02509	-0.0209605	Q14112-2;Q14112;A0A087WZP6;H0YJV3	Q14112-2;Q14112;A0A087WZP6	Nidogen-2	NID2	97.155	211870000	40	24.913	24.5037	25.0678	24.7679	25.2124	24.4414
1.25892	-0.15601	Q32Q12;P22392;P22392-2;O60361	Q32Q12;P22392;P22392-2;O60361	Nucleoside diphosphate kinase;Nucleoside diphosphate kinase B;Putative nucleoside diphosphate kinase	NME1-NME2;NME2;NME2P1	4.2488	165290000	15	24.3042	24.437	24.3366	24.2732	24.1272	24.2094
0.931531	1.16815	P15531;P15531-2;E7ERL0;J3KPD9;C9K028;F6XY72;E5RHP0	P15531;P15531-2;E7ERL0;J3KPD9	Nucleoside diphosphate kinase A	NME1;NME2	55.426	39306000	11	21.9898	21.2639	21.6632	23.5839	23.0866	21.7508
0.122393	0.0994479	H0YIZ1;P61916;J3KMY5;G3V3E8;E7EMS2;G3V3D1;G3V2V8;P61916-2	H0YIZ1;P61916;J3KMY5;G3V3E8;E7EMS2;G3V3D1;G3V2V8;P61916-2	Epididymal secretory protein E1	NPC2	12.163	213900000	21	24.9801	24.3309	24.5948	25.0952	24.8	24.309
0.242849	-0.283147	E9PLK3;P55786-2;P55786;A6NEC2;E9PJY4;E9PJ74;E9PPD4;H0YDG0;E9PRQ5;E9PP11;A6NEC2-3;A6NEC2-2	E9PLK3;P55786-2;P55786;A6NEC2	Puromycin-sensitive aminopeptidase;Puromycin-sensitive aminopeptidase-like protein	NPEPPS;NPEPPSL1	4.5683	14061000	4	23.3565	22.1747	22.5962	21.825	22.6504	22.8026
0.31262	0.246791	P06748-2;P06748;P06748-3;E5RI98;E5RGW4	P06748-2;P06748;P06748-3	Nucleophosmin	NPM1	110.78	550990000	58	25.639	26.4735	25.7335	25.8919	26.5322	26.1623
0.0759564	-0.167273	D6RH31;Q6UXI9-2;Q6UXI9-5;Q6UXI9;Q6UXI9-4;Q6UXI9-6;Q6UXI9-3	D6RH31;Q6UXI9-2;Q6UXI9-5;Q6UXI9;Q6UXI9-4;Q6UXI9-6;Q6UXI9-3	Nephronectin	NPNT	5.1815	22347000	3	22.0677	22.4204	22.9665	23.7583	21.4047	21.7898
0.15819	-0.218965	C9JYY6;F8W775;Q92823-3;Q92823-4;Q92823-6;Q92823-2;Q92823;Q92823-5;A0A087X2B3	C9JYY6;F8W775;Q92823-3;Q92823-4;Q92823-6;Q92823-2;Q92823;Q92823-5;A0A087X2B3	Neuronal cell adhesion molecule	NRCAM	4.3052	3508000	2	21.3025	22.4083	22.3356	22.4933	21.6953	21.2011
0.0339925	0.0683842	Q9UNZ2-6;Q9UNZ2;Q9UNZ2-5;F2Z2K0;Q9UNZ2-4	Q9UNZ2-6;Q9UNZ2;Q9UNZ2-5;F2Z2K0;Q9UNZ2-4	NSFL1 cofactor p47	NSFL1C	2.3588	6437700	3	21.6759	21.9729	21.3034	22.6581	22.0323	20.4669
0.433731	0.732456	Q02818;H7BZI1;C9JKZ2;C9JBD3;C9J3C1	Q02818;H7BZI1;C9JKZ2	Nucleobindin-1	NUCB1	7.065	99043000	15	22.7286	22.5197	24.7035	24.3148	24.1694	23.665
0.0155468	0.0275771	Q9H1E3;Q9H1E3-2	Q9H1E3;Q9H1E3-2	Nuclear ubiquitous casein and cyclin-dependent kinase substrate 1	NUCKS1	79.643	18094000	9	20.7766	21.6447	22.2778	21.3134	22.3744	21.094
0.0741746	0.156215	Q9Y266	Q9Y266	Nuclear migration protein nudC	NUDC	2.6666	24102000	5	22.4067	22.4321	23.0607	23.4066	23.584	21.3776
0.405781	-0.771094	O43809	O43809	Cleavage and polyadenylation specificity factor subunit 5	NUDT21	7.3001	6333600	7	21.5081	22.7408	21.8968	21.841	22.1416	19.8498
0.564691	0.978304	A6NFX8;Q9UKK9;A6NCQ0;A6NJU6;H0YEY4;C9JYY9	A6NFX8;Q9UKK9;A6NCQ0;A6NJU6	ADP-sugar pyrophosphatase	NUDT5	7.9411	24414000	7	21.2497	20.4021	23.0029	22.4005	22.5301	22.6589
0.0528767	0.0497405	P61970;H3BRV9	P61970;H3BRV9	Nuclear transport factor 2	NUTF2	12.325	264780000	25	24.4494	25.329	25.1027	25.0382	25.3208	24.6714
0.723067	-1.25884	A0A0G2JQK5;Q6DKJ4	A0A0G2JQK5;Q6DKJ4	Nucleoredoxin	NXN	2.1161	3172100	1	22.7438	21.7965	23.1265	19.9144	22.0306	21.9452
0.429971	-1.02878	Q86UD1;E9PJ29	Q86UD1;E9PJ29	Out at first protein homolog	OAF	4.1541	40795000	3	20.9651	23.3653	24.3981	22.0223	21.9632	21.6566
1.60494	-2.32266	P20774;Q5TBF5	P20774;Q5TBF5	Mimecan	OGN	104.23	318410000	34	27.0245	25.4093	25.612	24.1099	24.1276	22.8403
0.530077	0.652061	Q9NRN5;Q9NRN5-2;B4DNG0;Q9NRN5-3	Q9NRN5;Q9NRN5-2;B4DNG0	Olfactomedin-like protein 3	OLFML3	7.2915	50774000	11	21.8189	21.7102	23.1956	23.2706	22.4082	23.0022
0.224636	-0.203336	H7BZ94;P07237;I3L398;H0Y3Z3;I3L4M2;I3NI03;I3L3U6;I3L312;I3L514;I3L0S0;I3L1Y5;I3L3P5	H7BZ94;P07237;I3L398;H0Y3Z3	Protein disulfide-isomerase	P4HB	75.293	118050000	36	23.9141	24.2763	23.6339	23.1492	23.9254	24.1397
0.0986669	0.0971673	J3KNE3;P68402	J3KNE3;P68402	Platelet-activating factor acetylhydrolase IB subunit beta	PAFAH1B2	3.2363	22849000	9	21.7605	22.3755	21.9624	22.3584	21.5295	22.5021
0.360287	-1.18651	E9PBS1;P22234;P22234-2;D6RF62	E9PBS1;P22234;P22234-2;D6RF62	Multifunctional protein ADE2;Phosphoribosylaminoimidazole-succinocarboxamide synthase;Phosphoribosylaminoimidazole carboxylase	PAICS	2.9452	1445600	8	22.7107	22.2157	23.07	22.8585	22.8002	18.7782
0.363329	0.838626	K7ELW0;Q99497;K7EN27	K7ELW0;Q99497;K7EN27	Protein deglycase DJ-1	PARK7	55.818	230570000	43	24.6134	25.1511	22.2565	24.984	25.4088	24.144
0.310229	-0.32702	Q15365;F8VTZ0;F8W0G4;F8VXH9;F8W1G6;H3BRU6;F8VZX2;J3QT27;E9PFP8;Q15366-7;Q15366-8;Q15366-4;Q15366-5;P57721-2;P57721-3;P57721-5;Q15366-6;Q15366-3;Q15366;Q15366-2;P57721-4;P57721	Q15365	Poly(rC)-binding protein 1	PCBP1	16.017	33172000	3	22.9274	23.553	22.2094	22.5011	22.9197	22.288
0.433489	-0.487886	P12004	P12004	Proliferating cell nuclear antigen	PCNA	4.6306	0	3	22.0678	22.522	23.3307	22.136	22.6962	21.6246
0.079322	0.268442	Q15113	Q15113	Procollagen C-endopeptidase enhancer 1	PCOLCE	33.78	54661000	6	24.8023	20.9638	22.8507	22.3202	23.2606	23.8413
1.43037	1.38864	Q9UHG2;Q9NPY3	Q9UHG2	ProSAAS;KEP;Big SAAS;Little SAAS;Big PEN-LEN;PEN;Little LEN;Big LEN	PCSK1N	57.666	40162000	13	22.1785	22.2081	22.0523	24.355	23.4422	22.8076
0.612854	1.11103	K7EQA1;O14737;O14737-2	K7EQA1;O14737;O14737-2	Programmed cell death protein 5	PDCD5	10.461	147260000	8	21.4697	22.0823	23.8244	24.3274	23.4425	22.9396
0.0809769	0.150675	H7BZJ3	H7BZJ3		PDIA3	2.4476	33412000	2	22.6071	22.3459	20.547	22.0606	21.7637	22.1276
0.161824	0.223761	P30101	P30101	Protein disulfide-isomerase A3	PDIA3	13.659	120780000	25	24.0508	22.8878	24.3355	24.499	23.8684	23.578
0.866309	-0.643668	P13667	P13667	Protein disulfide-isomerase A4	PDIA4	11.471	41359000	10	23.154	23.4467	23.1847	21.9601	22.8591	23.0353
0.196976	-0.162739	Q15084-3;Q15084;Q15084-4;Q15084-5;Q15084-2	Q15084-3;Q15084;Q15084-4;Q15084-5;Q15084-2	Protein disulfide-isomerase A6	PDIA6	27.216	76261000	27	22.9625	23.6294	23.1968	22.6056	23.416	23.2789
0.971188	0.831813	B1AKZ5;Q15121	B1AKZ5;Q15121	Astrocytic phosphoprotein PEA-15	PEA15	48.183	12115000	5	21.6265	22.5843	21.3315	22.6643	22.9188	22.4547
0.131449	0.154435	P30086	P30086	Phosphatidylethanolamine-binding protein 1;Hippocampal cholinergic neurostimulating peptide	PEBP1	126.77	746390000	50	25.5158	27.0107	26.2926	26.4208	26.3979	26.4638
1.08213	0.852905	Q99471-2;Q99471;F8VNW6;F8VQZ2;H3BMQ1;H3BPF6;Q99471-3	Q99471-2;Q99471;F8VNW6;F8VQZ2;H3BMQ1;H3BPF6;Q99471-3	Prefoldin subunit 5	PFDN5	11.709	16025000	8	21.0323	21.7556	21.7486	22.0835	22.9298	22.082
0.127945	-0.1239	P07737;K7EJ44;CON__P02584;I3L3D5	P07737;K7EJ44	Profilin-1	PFN1	94.365	879020000	57	26.4794	26.7737	27.2078	26.8376	27.1046	26.1469
0.196327	-0.301817	C9JQ45;G5E9Q6;P35080-2;P35080;C9J712;C9J0J7;C9J2N0	C9JQ45;G5E9Q6;P35080-2;P35080;C9J712;C9J0J7;C9J2N0	Profilin;Profilin-2	PFN2	7.2992	38334000	8	21.7196	22.3915	21.7871	20.8662	21.4057	22.7208
0.359015	-0.581039	P18669;Q8N0Y7;P15259	P18669;Q8N0Y7	Phosphoglycerate mutase 1;Probable phosphoglycerate mutase 4	PGAM1;PGAM4	51.816	159600000	13	23.8946	24.4359	24.4045	24.4499	22.3716	24.1703
0.00990979	0.0120519	P52209-2;P52209;K7ELN9;K7EPF6;K7EMN2;K7EM49	P52209-2;P52209;K7ELN9	6-phosphogluconate dehydrogenase, decarboxylating	PGD	76.518	118610000	39	24.078	23.4762	23.5709	23.6294	23.1572	24.3746
0.382169	-0.409637	P00558;P00558-2;P07205	P00558;P00558-2	Phosphoglycerate kinase 1	PGK1	175.46	1021000000	85	26.6828	27.906	27.4123	26.3722	27.1525	27.2475
0.228258	-0.957089	P36871-3;P36871;P36871-2	P36871-3;P36871;P36871-2	Phosphoglucomutase-1	PGM1	2.6937	4244200	3	24.0834	22.1351	21.6258	21.9807	24.0114	18.9811
0.169185	-0.163482	Q96G03	Q96G03	Phosphoglucomutase-2	PGM2	2.2039	499390	1	22.6208	22.6889	22.4309	21.7243	22.9114	22.6144
0.268924	-0.304836	C9JW96;P35232;C9JZ20;E7ESE2;E9PCW0	C9JW96;P35232;C9JZ20;E7ESE2;E9PCW0	Prohibitin	PHB	3.0945	0	2	22.2549	23.3214	22.0704	22.6041	22.317	21.8112
0.541221	0.819735	A0A286YF22;A0A2C9F2M7;O43175;A0A286YFL2;A0A286YFA2;A0A286YER3;A0A286YFC8;A0A286YFB2;A0A286YFM8;A0A286YF34;A0A286YFF3;A0A286YFK5	A0A286YF22;A0A2C9F2M7;O43175;A0A286YFL2;A0A286YFA2;A0A286YER3;A0A286YFC8;A0A286YFB2;A0A286YFM8	D-3-phosphoglycerate dehydrogenase	PHGDH	4.671	34834000	8	22.451	21.3417	23.4334	23.6973	23.2806	22.7074
0.530672	-0.198327	Q9NRX4-2;Q9NRX4	Q9NRX4-2;Q9NRX4	14 kDa phosphohistidine phosphatase	PHPT1	15.509	63002000	13	23.3636	23.1868	23.2717	23.3692	22.8348	23.0231
0.0159485	0.0276197	B3KYB6;B3KYB7;A0A0A0MSW4;P48739;P48739-2;P48739-3	B3KYB6;B3KYB7;A0A0A0MSW4;P48739;P48739-2;P48739-3	Phosphatidylinositol transfer protein beta isoform	PITPNB	4.296	0	2	23.0206	21.8393	22.6341	21.625	22.8415	23.1105
0.190802	-0.102613	P14618;P14618-3;P14618-2;H3BTN5;B4DNK4;H3BQ34;H3BR70;H3BT25;H3BUW1;H3BTJ2;P30613-2;P30613	P14618;P14618-3;P14618-2;H3BTN5;B4DNK4;H3BQ34;H3BR70	Pyruvate kinase PKM;Pyruvate kinase	PKM	150.21	681430000	58	26.2935	26.8957	26.5295	26.2923	26.4524	26.6661
0.22259	-0.476672	K7ERZ3;O60664-2;O60664-4;O60664-3;O60664	K7ERZ3;O60664-2;O60664-4;O60664-3;O60664	Perilipin-3	PLIN3	3.8004	3406900	3	22.643	22.3229	22.1609	20.2643	22.8939	22.5386
0.468939	0.708843	Q02809;Q02809-2	Q02809;Q02809-2	Procollagen-lysine,2-oxoglutarate 5-dioxygenase 1	PLOD1	5.2031	23593000	10	22.4292	22.1385	21.8066	23.6722	21.6017	23.227
0.17355	-0.32082	H7C4N2;A0A0A0MSQ0;P13797-3;P13797-2;P13797	H7C4N2;A0A0A0MSQ0;P13797-3;P13797-2;P13797	Plastin-3	PLS3	4.696	9089700	5	21.6994	21.6386	23.2268	22.3243	22.3491	20.929
0.572242	-0.979027	P55058;P55058-3;P55058-2;P55058-4	P55058;P55058-3;P55058-2;P55058-4	Phospholipid transfer protein	PLTP	54.546	232730000	33	25.8091	24.8775	24.3058	24.8226	24.4394	22.7934
0.478983	-0.248245	Q6UX71-2;Q6UX71	Q6UX71-2;Q6UX71	Plexin domain-containing protein 2	PLXDC2	12.868	0	2	21.7696	22.234	22.0498	21.9508	21.4095	21.9484
0.225762	0.116606	E2PU09;O15031	E2PU09;O15031	Plexin-B2	PLXNB2	3.5113	0	2	22.3841	22.277	21.8292	22.2568	22.1038	22.4796
0.0639711	0.17605	O00592-2;O00592	O00592-2;O00592	Podocalyxin	PODXL	6.277	40067000	3	22.227	21.1735	24.4	22.7727	22.5723	22.9836
0.860684	1.4815	Q15063-5	Q15063-5	Periostin	POSTN	2.5535	191170000	5	23.074	22.6733	21.4808	23.1388	23.3665	25.1673
0.219444	-0.271793	Q15181;Q5SQT6	Q15181	Inorganic pyrophosphatase	PPA1	5.4305	12567000	6	23.4156	22.5328	22.0774	22.9472	22.0138	22.2494
1.10034	-0.823324	P62937;F8WE65;C9J5S7;P62937-2;P0DN26;A0A0H2UH34;A0A0B4J2A2;A0A075B767;A0A075B759;Q9Y536;F5H284;E5RIZ5;P0DN37	P62937;F8WE65;C9J5S7;P62937-2	Peptidyl-prolyl cis-trans isomerase A;Peptidyl-prolyl cis-trans isomerase A, N-terminally processed;Peptidyl-prolyl cis-trans isomerase	PPIA	256.81	1752900000	96	27.731	28.3727	28.276	26.8579	27.2051	27.8467
0.621523	0.711624	P23284	P23284	Peptidyl-prolyl cis-trans isomerase B	PPIB	9.204	123730000	18	22.9792	24.1258	24.5065	24.3281	25.0478	24.3705
0.152976	-0.448767	P45877	P45877	Peptidyl-prolyl cis-trans isomerase C	PPIC	2.1535	11581000	5	22.236	21.7859	22.6811	22.62	23.0652	19.6715
0.479843	0.667819	F8WE71;C9J9S3;C9JP48;A0A087WYY5;F5H1L6;E7ETD8;F5H037;E9PMD7;F8VR82;F8VYE8;F8W0W8;P36873;P62140;P62136;P36873-2;P62136-2	F8WE71;C9J9S3;C9JP48;A0A087WYY5;F5H1L6;E7ETD8;F5H037;E9PMD7;F8VR82;F8VYE8;F8W0W8;P36873;P62140;P62136;P36873-2;P62136-2	Serine/threonine-protein phosphatase;Serine/threonine-protein phosphatase PP1-gamma catalytic subunit;Serine/threonine-protein phosphatase PP1-beta catalytic subunit;Serine/threonine-protein phosphatase PP1-alpha catalytic subunit	PPP1CB;PPP1CC;PPP1CA	4.6318	27428000	7	20.2942	22.0904	21.7634	22.4406	21.597	22.1138
0.758321	-0.225073	P30153;B3KQV6;C9J9C1;E9PH38	P30153;B3KQV6	Serine/threonine-protein phosphatase 2A 65 kDa regulatory subunit A alpha isoform	PPP2R1A	7.5217	47826000	10	22.9203	22.746	22.7836	22.3985	22.5484	22.8278
0.0172292	0.0426826	A8MU39;H0YDU8;P53041	A8MU39;H0YDU8;P53041	Serine/threonine-protein phosphatase;Serine/threonine-protein phosphatase 5	PPP5C	2.62	2487200	2	22.0374	23.1192	23.6753	24.2444	21.9709	22.7447
0.381558	0.406394	Q06830;A0A0A0MSI0;A0A0A0MRQ5;H7C3T4;Q13162	Q06830;A0A0A0MSI0;A0A0A0MRQ5	Peroxiredoxin-1	PRDX1	61.183	974660000	62	25.9028	27.0494	26.773	27.4047	27.1	26.4397
0.733752	0.722263	P32119;A6NIW5;P32119-2	P32119;A6NIW5	Peroxiredoxin-2	PRDX2	24.323	594750000	35	25.4224	26.6109	25.3198	26.286	26.3742	26.8597
0.859828	1.24936	P30048-2;P30048	P30048-2;P30048	Thioredoxin-dependent peroxide reductase, mitochondrial	PRDX3	2.849	39128000	6	22.9528	20.743	22.0067	23.1201	22.792	23.5385
0.602899	0.769222	P30044-2;P30044-3;P30044;P30044-4	P30044-2;P30044-3;P30044;P30044-4	Peroxiredoxin-5, mitochondrial	PRDX5	27.983	58340000	13	22.5001	21.3908	23.314	23.4116	23.1157	22.9853
0.0573311	0.0786165	P30041	P30041	Peroxiredoxin-6	PRDX6	7.5234	47854000	9	21.4976	22.5584	22.2356	21.5449	22.774	22.2085
0.174683	0.207167	K7EPW7;K7ELL7;P14314-2;P14314;K7EIP3;K7EKX1;K7EJ70	K7EPW7;K7ELL7;P14314-2;P14314	Glucosidase 2 subunit beta	PRKCSH	5.2764	0	3	22.6254	22.2834	22.7305	22.6644	23.5368	22.0596
0.98989	0.602801	C9JIZ6;P07602;P07602-2;P07602-3;A0A0J9YXB8;Q5BJH1	C9JIZ6;P07602;P07602-2;P07602-3	Prosaposin;Saposin-A;Saposin-B-Val;Saposin-B;Saposin-C;Saposin-D	PSAP	29.263	328420000	32	24.9781	24.1881	25.0158	25.2792	25.5112	25.2001
1.22151	-1.13046	Q9Y617;Q9Y617-2	Q9Y617;Q9Y617-2	Phosphoserine aminotransferase	PSAT1	6.9059	15686000	6	23.2893	22.7678	24.1064	22.3341	22.5469	21.8912
0.138211	-0.269476	O75475-3;O75475-2;O75475	O75475-3;O75475-2;O75475	PC4 and SFRS1-interacting protein	PSIP1	2.4139	11607000	6	21.7539	22.7144	21.7647	22.6995	22.1738	20.5513
0.309098	-0.415686	A0A024RA52;P25787;H7C402;H3BT36;C9JCK5	A0A024RA52;P25787;H7C402;H3BT36;C9JCK5	Proteasome subunit alpha type;Proteasome subunit alpha type-2	PSMA2	9.7139	30454000	3	24.0411	22.3416	23.4793	22.6922	22.6023	23.3205
2.41852	-1.20905	P25788-2;P25788;G3V3W4;G3V5N4;G3V4X5	P25788-2;P25788	Proteasome subunit alpha type-3	PSMA3	5.1663	25150000	8	22.8484	22.5306	22.6216	21.1106	21.6901	21.5727
0.958265	-1.37245	P28066;P28066-2	P28066;P28066-2	Proteasome subunit alpha type-5	PSMA5	31.682	30003000	3	23.7015	23.6058	22.3422	20.8731	22.5867	22.0724
0.724866	1.22988	O14818;H0Y586;O14818-4;O14818-2;Q8TAA3-2;Q8TAA3-5;Q8TAA3;F5GY34;A0A087WYS6	O14818;H0Y586;O14818-4;O14818-2;Q8TAA3-2;Q8TAA3-5;Q8TAA3	Proteasome subunit alpha type-7;Proteasome subunit alpha type-7-like	PSMA7;PSMA8	6.4618	83055000	6	21.6299	21.4255	21.8016	22.0774	22.0825	24.3867
0.554814	0.900384	P20618	P20618	Proteasome subunit beta type-1	PSMB1	2.6556	3478500	6	22.3676	20.4255	22.0597	21.8287	22.5379	23.1872
1.47423	-2.22211	P28070	P28070	Proteasome subunit beta type-4	PSMB4	2.8805	9053300	5	23.6998	22.7459	22.4662	21.444	21.2281	19.5735
0.131215	0.163914	Q99436	Q99436	Proteasome subunit beta type-7	PSMB7	3.3041	38890000	10	22.996	22.3419	21.4136	22.3835	22.4281	22.4316
0.375152	-0.964116	Q13200;F8WBS8;C9JPC0;Q13200-2;Q13200-3	Q13200;F8WBS8;C9JPC0;Q13200-2;Q13200-3	26S proteasome non-ATPase regulatory subunit 2	PSMD2	4.02	2252400	2	22.5301	22.7711	21.8597	22.4475	22.4833	19.3378
0.208562	-0.369289	Q06323;H0YKK6;Q06323-3;Q06323-2	Q06323;H0YKK6;Q06323-3;Q06323-2	Proteasome activator complex subunit 1	PSME1	2.0029	15218000	5	22.3325	23.6243	22.8396	23.1818	21.4175	23.0892
0.0625182	0.129933	H0YM70;A0A087X1Z3;Q9UL46;H0YKU2	H0YM70;A0A087X1Z3;Q9UL46	Proteasome activator complex subunit 2	PSME2	9.3247	12303000	3	20.7421	22.1457	23.1886	22.3868	22.1682	21.9113
0.442429	-1.39766	K7ES59;K7EKJ7;A6NLN1;A0A0U1RRM4;P26599;P26599-2;P26599-3;K7ELW5	K7ES59;K7EKJ7;A6NLN1;A0A0U1RRM4;P26599;P26599-2;P26599-3;K7ELW5	Polypyrimidine tract-binding protein 1	PTBP1	30.133	192440000	23	24.0658	25.5196	24.5801	24.5244	24.6978	20.7502
0.707855	-0.622724	Q13308-5;Q13308-4;Q13308;Q13308-6;H7C5L0;Q13308-2;Q86X91;Q13308-3	Q13308-5;Q13308-4;Q13308;Q13308-6;H7C5L0;Q13308-2	Inactive tyrosine-protein kinase 7	PTK7	6.9721	24269000	5	22.6852	21.9036	22.9716	22.0704	22.2057	21.4162
0.167829	-0.330069	B8ZZQ6;P06454-2;P06454	B8ZZQ6;P06454-2;P06454	Prothymosin alpha;Prothymosin alpha, N-terminally processed;Thymosin alpha-1	PTMA	55.868	96520000	8	20.8571	22.2643	22.7392	21.9274	22.2618	20.6812
1.78868	1.37672	F5H7R9;F5GXR3;P20962	F5H7R9;F5GXR3;P20962	Parathymosin	PTMS	5.2657	21233000	8	21.9508	21.3852	21.69	22.4486	23.2909	23.4166
1.81838	1.01732	C9JR52;P21246	C9JR52;P21246	Pleiotrophin	PTN	3.6593	56852000	7	21.9963	22.385	22.7017	23.4054	23.6135	23.1161
1.5749	1.1648	P23471-3;P23471-2;P23471	P23471-3;P23471-2;P23471	Receptor-type tyrosine-protein phosphatase zeta	PTPRZ1	5.1336	71898000	9	21.5038	22.5113	21.7507	22.8897	23.3896	22.9808
0.70645	-1.31445	Q92626	Q92626	Peroxidasin homolog	PXDN	19.562	46447000	11	24.0777	21.5202	23.7591	21.5249	21.5414	22.3473
0.100799	0.111238	A0A0U1RQC3;F2Z2V6;A0A0U1RQM8;A0A0U1RQU2;A0A0U1RRI9;A0A0U1RQE9;C9J165;A0A0U1RQT0;P47897-2;P47897	A0A0U1RQC3;F2Z2V6;A0A0U1RQM8;A0A0U1RQU2;A0A0U1RRI9;A0A0U1RQE9;C9J165;A0A0U1RQT0;P47897-2;P47897	Glutamine--tRNA ligase	QARS	2.6508	0	1	22.3628	23.1336	22.1757	22.4363	23.2006	22.369
0.594165	-0.431326	O00391-2;O00391;A8MXT8	O00391-2;O00391	Sulfhydryl oxidase 1	QSOX1	7.6923	36827000	15	22.266	21.8565	22.7646	22.1603	21.5079	21.9251
0.604465	1.46519	B5MDF5;J3KQE5;P62826;F5H018;H0YFC6;B4DV51	B5MDF5;J3KQE5;P62826;F5H018;H0YFC6	GTP-binding nuclear protein Ran	RAN	5.6452	151970000	21	21.0313	24.2867	24.1172	24.8825	24.8274	24.1208
0.528465	-0.908663	C9JXG8;C9JGV6;F6WQW2;P43487-2;P43487	C9JXG8;C9JGV6;F6WQW2;P43487-2;P43487	Ran-specific GTPase-activating protein	RANBP1	2.8385	9066300	1	22.8561	22.2983	22.8857	22.5094	22.4981	20.3066
0.212802	-0.292144	P61224-2;P61224-3;P62834;P61224;A6NIZ1;F8WBC0;F5H4H0;F5GYH7;F5H077;F5GWU8;F5H491;F5H0B7;F5H500;F5H823;B7ZB78;F5GZG1;F5H6R7;F5H004;A0A075B6Q0;F5GYB5;F5GX62;E7ESV4;F5H7Y6;P61224-4	P61224-2;P61224-3;P62834;P61224;A6NIZ1;F8WBC0;F5H4H0;F5GYH7;F5H077;F5GWU8;F5H491;F5H0B7;F5H500;F5H823;B7ZB78;F5GZG1;F5H6R7;F5H004;A0A075B6Q0;F5GYB5;F5GX62;E7ESV4;F5H7Y6;P61224-4	Ras-related protein Rap-1b;Ras-related protein Rap-1A;Ras-related protein Rap-1b-like protein	RAP1B;RAP1A	18.986	18378000	9	21.7717	22.1046	22.7939	22.6906	21.1678	21.9355
0.900496	-1.19989	A0A0A0MTB9;H0YAK8;A0A0A0MQT0;P09455;P09455-2;P09455-3	A0A0A0MTB9;H0YAK8;A0A0A0MQT0;P09455;P09455-2;P09455-3	Retinol-binding protein 1	RBP1	3.8794	100420000	5	23.2727	24.6412	22.6011	22.2502	22.6077	22.0574
0.462676	0.789823	Q5VY30;P02753	Q5VY30;P02753	Retinol-binding protein 4;Plasma retinol-binding protein(1-182);Plasma retinol-binding protein(1-181);Plasma retinol-binding protein(1-179);Plasma retinol-binding protein(1-176)	RBP4	14.579	64385000	9	23.6155	21.6036	21.8803	23.8133	23.1734	22.4822
0.152796	0.233761	E9PP27;Q15293-2;Q15293	E9PP27;Q15293-2;Q15293	Reticulocalbin-1	RCN1	15.313	21440000	9	22.529	21.9657	20.893	22.6099	21.5494	21.9296
0.310044	-0.633939	A0A2R8Y5S7;P35241;P35241-5;A0A2R8Y7M3;P35241-4;P35241-3;P35241-2;A0A2R8Y4H6	A0A2R8Y5S7;P35241;P35241-5;A0A2R8Y7M3;P35241-4	Radixin	RDX	5.1607	15960000	7	21.0883	23.3123	21.1283	21.7549	20.4404	21.4318
0.441606	-0.779715	J3KQ66;P78509-3;P78509-2;P78509	J3KQ66;P78509-3;P78509-2;P78509	Reelin	RELN	5.3295	11797000	3	22.2523	21.8477	24.0255	22.1286	22.4218	21.2359
0.331412	-0.934309	C9JRM1;C9JNR4;C9JX21;P61586	C9JRM1;C9JNR4;C9JX21;P61586	Transforming protein RhoA	RHOA	4.5196	5373800	6	21.5422	22.8991	23.2377	22.5952	22.7329	19.548
0.352657	-0.778924	Q6F5E8-2;Q6F5E8	Q6F5E8-2;Q6F5E8	Leucine-rich repeat-containing protein 16C	RLTPR	1.7826	47102000	2	24.2095	21.2455	22.8677	22.6407	21.7869	21.5583
0.03649	0.0462004	P62906	P62906	60S ribosomal protein L10a	RPL10A	4.0423	43675000	12	22.4307	23.0277	22.7443	22.9275	22.0387	23.3752
0.25485	-0.697851	Q5VVC8;P62913-2;P62913	Q5VVC8;P62913-2;P62913	60S ribosomal protein L11	RPL11	1.8659	3624100	0	22.0397	21.7309	22.2513	21.2648	23.1973	19.4663
0.387336	-0.662072	P30050-2;P30050	P30050-2;P30050	60S ribosomal protein L12	RPL12	1.8262	10137000	1	22.7295	23.1788	22.9007	21.3434	23.6639	21.8154
0.157638	0.288642	J3KRB3;A0A087WWH0;J3QS96;A0A087WXM6;J3QQT2;J3QLC8;J3KRX5;A0A0A0MRF8;A0A0A6YYL6;P18621-2;P18621;P18621-3;A0A087WY81	J3KRB3;A0A087WWH0;J3QS96;A0A087WXM6;J3QQT2;J3QLC8;J3KRX5;A0A0A0MRF8;A0A0A6YYL6;P18621-2;P18621;P18621-3;A0A087WY81	60S ribosomal protein L17	RPL17;RPL17-C18orf32	3.2745	7648900	4	21.4474	22.1116	21.8517	23.368	21.7364	21.1722
0.0453767	0.102764	F8VUA6;G3V203;H0YHA7;J3QQ67;Q07020-2;Q07020	F8VUA6;G3V203;H0YHA7;J3QQ67;Q07020-2;Q07020	60S ribosomal protein L18	RPL18	2.3717	3695700	1	22.4556	21.8522	22.5726	23.3159	22.9432	20.9296
1.34833	-1.1131	C9JXB8;C9JNW5;P83731	C9JXB8;C9JNW5;P83731	60S ribosomal protein L24	RPL24	2.3859	5565200	1	23.3285	22.778	22.0645	21.849	21.5429	21.4398
0.703643	-0.580554	A0A3B3ITT5;P47914	A0A3B3ITT5;P47914	60S ribosomal protein L29	RPL29	2.1823	10783000	5	23.1275	22.7369	23.0709	22.5707	21.713	22.9099
0.730594	0.832895	G5E9G0;P39023;B5MCW2	G5E9G0;P39023;B5MCW2	60S ribosomal protein L3	RPL3	2.1365	16575000	2	22.7964	21.5467	21.5083	22.1991	22.9173	23.2336
0.00867834	-0.0329158	Q02878	Q02878	60S ribosomal protein L6	RPL6	8.7655	952790	3	22.544	22.2496	21.27	22.4933	23.7441	19.7274
0.136046	-0.0895259	F8VS58;F8VQY6;F8VRK7;G3V210;F8VZS0;F8VU65;F8VWS0;P05388-2;Q8NHW5;P05388;F8VWV4;F8VPE8;F8VW21	F8VS58;F8VQY6;F8VRK7;G3V210;F8VZS0;F8VU65;F8VWS0;P05388-2;Q8NHW5;P05388;F8VWV4;F8VPE8;F8VW21	60S acidic ribosomal protein P0;60S acidic ribosomal protein P0-like	RPLP0;RPLP0P6	8.2011	30950000	18	22.1051	22.4745	21.9329	21.9398	21.86	22.4442
0.261532	-0.28155	P05386	P05386	60S acidic ribosomal protein P1	RPLP1	27.69	127070000	11	24.4414	24.401	23.6123	24.3938	23.25	23.9664
0.344291	1.08268	P05387;H0YDD8	P05387	60S acidic ribosomal protein P2	RPLP2	6.3951	192940000	17	20.9917	24.8157	24.7901	24.0837	25.071	24.6909
0.224343	-0.239711	P25398	P25398	40S ribosomal protein S12	RPS12	31.541	20403000	19	22.0701	21.4315	20.9491	20.9699	21.7685	20.9931
0.0230114	0.0484365	J3KMX5;P62277	J3KMX5;P62277	40S ribosomal protein S13	RPS13	9.8039	4729400	6	22.3627	22.4429	20.9059	21.3298	21.5968	22.9303
0.642114	-0.886147	H3BNG3;H0YE27;H0YEN5;E9PPT0;E9PMM9;E9PQD7;P15880	H3BNG3;H0YE27;H0YEN5;E9PPT0;E9PMM9;E9PQD7;P15880	40S ribosomal protein S2	RPS2	10.174	14883000	6	22.0219	23.4526	21.7928	21.5698	20.9242	22.1149
1.73432	-1.40294	E5RIP1;E5RJX2;P60866;P60866-2	E5RIP1;E5RJX2;P60866;P60866-2	40S ribosomal protein S20	RPS20	9.0241	7164600	7	22.999	23.1705	23.0424	22.3908	21.298	21.3144
0.332831	-0.339599	P62081;B5MCP9	P62081;B5MCP9	40S ribosomal protein S7	RPS7	3.9519	42926000	13	22.9306	23.6494	22.7497	23.3672	22.6641	22.2796
0.328145	-0.338007	F8WD59;C9J9K3;A0A0C4DG17;P08865	F8WD59;C9J9K3;A0A0C4DG17;P08865	40S ribosomal protein SA	RPSA	5.7211	34604000	3	21.6031	22.4737	23.0428	22.1656	21.9578	21.9822
1.06781	-1.68791	P60903	P60903	Protein S100-A10	S100A10	7.7431	103330000	10	24.9228	24.3331	22.8171	22.9729	22.4329	21.6034
1.02891	1.09154	P31949	P31949	Protein S100-A11;Protein S100-A11, N-terminally processed	S100A11	22.856	74835000	10	21.7579	21.699	22.5658	22.4209	23.0322	23.8442
0.109074	-0.342588	P82979;F8VS12;F8VZQ9;H0YHG0	P82979;F8VS12;F8VZQ9;H0YHG0	SAP domain-containing ribonucleoprotein	SARNP	11.434	10915000	5	24.7975	21.1084	22.1558	21.9417	22.9091	22.1832
2.44464	-1.29206	P13521;C9JQI2	P13521;C9JQI2	Secretogranin-2;Secretoneurin;Manserin	SCG2	12.566	11877000	10	22.8898	22.9451	23.1894	21.8722	21.9374	21.3385
0.147453	0.236014	Q8WXD2;Q8WXD2-2	Q8WXD2	Secretogranin-3	SCG3	51.496	57176000	11	22.7847	22.1066	23.0697	23.5388	23.2744	21.8558
0.247956	0.327777	E5RJB8;E5RHU3;E7ESK6;E9PBI9;P34741	E5RJB8;E5RHU3;E7ESK6;E9PBI9;P34741	Syndecan;Syndecan-2	SDC2	1.9891	0	3	21.4949	21.9001	22.709	23.1173	21.8763	22.0938
0.623398	-0.635122	G5EA09;O00560-3;O00560-2;O00560	G5EA09;O00560-3;O00560-2;O00560	Syntenin-1	SDCBP	2.2789	15237000	3	22.0635	23.2485	22.034	22.1964	21.8221	21.4221
0.245812	0.294538	H0Y3T6;Q9BRK5-5;Q9BRK5-2;Q9BRK5-6;Q9BRK5	H0Y3T6;Q9BRK5-5;Q9BRK5-2;Q9BRK5-6;Q9BRK5	45 kDa calcium-binding protein	SDF4	12.061	4191300	4	21.7118	22.5445	21.3602	22.4548	21.5317	22.5137
2.48695	1.43272	A0A024R6I7;P01009;A0A0G2JRN3;P01009-2;P01009-3;G3V2B9;G3V544;G3V5R8;G3V387;A0A0B4J278	A0A024R6I7;P01009;A0A0G2JRN3;P01009-2;P01009-3	Alpha-1-antitrypsin;Short peptide from AAT	SERPINA1	323.31	1930800000	143	27.1503	27.2197	27.3485	28.9764	28.2445	28.7959
0.0822309	-0.24093	A0A2R8YD12;A0A024QZX5;A0A087X1N8;P35237;A0A2R8Y6A7	A0A2R8YD12;A0A024QZX5;A0A087X1N8;P35237;A0A2R8Y6A7	Serpin B6	SERPINB6	3.5239	2152100	5	22.5181	21.4094	22.715	22.4326	23.3453	20.1418
0.0475184	0.0903161	P50453;H7BXK7;C9J7N5;A0A1B0GU38;A0A0C4DGW9;P30740-2;P50452-2;P50452;P30740;O75830	P50453	Serpin B9	SERPINB9	2.0182	1856300	2	20.824	22.1674	23.0138	22.2757	22.1633	21.8372
0.423764	-0.553356	P01008;Q8TCE1	P01008;Q8TCE1	Antithrombin-III	SERPINC1	6.8397	17634000	9	22.9828	22.0662	21.0611	21.5845	21.4285	21.4371
0.159055	-0.182959	P07093-2;P07093;P07093-3;C9JN98	P07093-2;P07093;P07093-3;C9JN98	Glia-derived nexin	SERPINE2	2.8686	26026000	1	22.7531	21.6384	21.6481	21.4001	22.1406	21.9499
0.104893	-0.128986	P36955;I3L4N7;I3L107;I3L4F9;I3L4Z0;CON__Q95121;I3L2R7;I3L425;I3L3Z3;I3L1U4	P36955	Pigment epithelium-derived factor	SERPINF1	169.82	1953700000	108	28.4769	27.1299	27.4197	27.4537	27.8754	27.3104
0.230116	0.342045	P05155-2;P05155;P05155-3;H9KV48;E9PGN7	P05155-2;P05155;P05155-3;H9KV48;E9PGN7	Plasma protease C1 inhibitor	SERPING1	8.1656	50401000	7	23.4264	22.7498	21.7769	22.978	22.4255	23.5756
0.161222	-0.151104	P50454;E9PK86;E9PMI5;E9PR70;E9PPV6;E9PJH8;E9PIG2;E9PRS3;E9PNX1;E9PLA6;E9PKH2;H0YEP8;E9PQ34	P50454;E9PK86;E9PMI5;E9PR70;E9PPV6;E9PJH8;E9PIG2;E9PRS3;E9PNX1	Serpin H1	SERPINH1	171.99	249480000	36	25.688	25.0632	24.483	24.963	24.8212	24.9966
0.159548	0.245157	A0A0C4DFV9;Q01105-3;Q01105-4;Q01105-2;Q01105;A0A087X027;P0DME0	A0A0C4DFV9;Q01105-3;Q01105-4;Q01105-2;Q01105;A0A087X027;P0DME0	Protein SET;Protein SETSIP	SET;SETSIP	33.287	99230000	14	22.3933	24.1343	23.8482	23.5856	24.102	23.4237
0.291362	-0.207434	P23246;P23246-2;H0Y9K7	P23246;P23246-2	Splicing factor, proline- and glutamine-rich	SFPQ	7.2717	20747000	11	21.659	21.7917	22.2515	21.8798	21.9552	21.2449
0.544452	0.982523	Q8N474;Q6ZSL4	Q8N474;Q6ZSL4	Secreted frizzled-related protein 1	SFRP1	8.7605	72875000	17	23.3089	21.0553	23.185	23.0349	23.3541	24.1078
0.933251	-1.45715	Q5T123;Q9H299	Q5T123;Q9H299	SH3 domain-binding glutamic acid-rich-like protein 3	SH3BGRL3	1.9509	22590000	2	23.7495	21.4158	22.5146	21.0764	21.6007	20.6314
0.894379	1.00358	P63208;E7ERH2;F8W8N3;E5RJR5;P63208-2;E5RGM3	P63208;E7ERH2;F8W8N3;E5RJR5;P63208-2	S-phase kinase-associated protein 1	SKP1	9.2199	39524000	11	21.5509	22.765	22.0852	23.9124	22.7665	22.7329
0.448209	0.57299	F8VVM2;Q00325-2;Q00325	F8VVM2;Q00325-2;Q00325	Phosphate carrier protein, mitochondrial	SLC25A3	10.108	3185300	2	21.603	21.6901	22.1791	21.7855	21.9745	23.4311
0.0711578	-0.172064	O14745;J3QRP6;O14745-2	O14745;J3QRP6	Na(+)/H(+) exchange regulatory cofactor NHE-RF1	SLC9A3R1	18.408	30939000	12	21.2446	22.0077	23.6021	23.0463	21.4231	21.8687
0.309639	-0.431831	A0A0A0MSC8;O75094-3;O75094;O75094-4;O75094-2	A0A0A0MSC8;O75094-3;O75094;O75094-4;O75094-2	Slit homolog 3 protein	SLIT3	4.3272	4340700	5	22.0479	23.0357	21.9661	21.0369	22.1726	22.5447
2.49729	-1.25893	J3QLI9;P62314	J3QLI9;P62314	Small nuclear ribonucleoprotein Sm D1	SNRPD1	10.319	27728000	9	21.9735	22.5848	22.3807	21.0351	21.21	20.9173
0.463456	0.672321	P62318-2;P62318	P62318-2;P62318	Small nuclear ribonucleoprotein Sm D3	SNRPD3	3.1046	10862000	2	22.8284	23.2338	21.4211	22.8234	23.7696	22.9072
0.0666636	-0.0782032	P04179-4;P04179-2;P04179;F5H3C5;F5H4R2;F5GYZ5;P04179-3;G8JLJ2;G5E9P6;F5GXZ9	P04179-4;P04179-2;P04179;F5H3C5;F5H4R2;F5GYZ5;P04179-3	Superoxide dismutase [Mn], mitochondrial	SOD2	10.665	16195000	7	22.1905	22.8263	21.4787	22.3253	21.8976	22.0379
1.25413	0.601328	P09486;F5GY03;E5RK62	P09486;F5GY03	SPARC	SPARC	172.63	2845400000	93	28.3878	27.6932	28.301	28.8335	28.6981	28.6544
0.22577	-0.712189	Q14515-2;Q14515	Q14515-2;Q14515	SPARC-like protein 1	SPARCL1	10.782	4675800	7	22.763	21.5967	21.5924	22.8627	21.9632	18.9895
0.169725	-0.464743	P10451-4;P10451-5;P10451-2;P10451	P10451-4;P10451-5;P10451-2;P10451	Osteopontin	SPP1	3.1899	18269000	8	22.8982	22.1281	22.82	24.0108	20.5606	21.8807
0.217452	-0.287094	A0A0D9SF54;A0A0D9SGF6;Q13813-3;Q13813;Q13813-2	A0A0D9SF54;A0A0D9SGF6;Q13813-3;Q13813;Q13813-2	Spectrin alpha chain, non-erythrocytic 1	SPTAN1	4.7591	11149000	8	22.5661	21.7349	23.2971	21.809	22.6587	22.2691
0.11826	-0.135013	A0A087WUZ3;Q01082	A0A087WUZ3;Q01082	Spectrin beta chain, non-erythrocytic 1	SPTBN1	1.9974	6528200	2	22.2678	22.0697	23.2131	22.0565	22.2882	22.8008
0.539306	-1.22701	H0YLA2;P37108	H0YLA2;P37108	Signal recognition particle 14 kDa protein	SRP14	2.014	4955800	4	24.2549	22.6047	21.9623	22.9392	20.3934	21.8083
0.138307	-0.246075	P49458;E9PE20;P49458-2	P49458;E9PE20;P49458-2	Signal recognition particle 9 kDa protein	SRP9	3.4536	28281000	8	23.2425	23.1027	21.3687	22.55	22.6253	21.8005
0.99279	0.670207	J3KTL2;Q07955;Q07955-3;Q07955-2;J3QQV5;J3KSW7;S4R3G0;J3KSR8;Q13242	J3KTL2;Q07955;Q07955-3;Q07955-2	Serine/arginine-rich splicing factor 1	SRSF1	5.9358	24021000	12	21.9519	22.2832	22.9377	23.2073	23.1696	22.8065
0.462927	-0.47876	P05455;E9PFL9;E7ERC4;E9PGX9	P05455;E9PFL9;E7ERC4	Lupus La protein	SSB	2.1302	9882900	3	22.8388	22.1708	21.8435	21.6671	22.4472	21.3025
0.373758	-1.32245	O76061	O76061	Stanniocalcin-2	STC2	1.8768	1679600	1	21.811	21.5557	23.1358	22.8268	18.1418	21.5665
0.764948	0.775944	P31948;P31948-2;P31948-3;F5H783;F5GXD8;H0YGI8	P31948;P31948-2;P31948-3	Stress-induced-phosphoprotein 1	STIP1	22.702	78207000	33	21.9855	23.3397	23.3635	23.7629	23.4674	23.7863
0.345758	1.25304	A2A2D0;P16949;P16949-2	A2A2D0;P16949;P16949-2	Stathmin	STMN1	11.453	286150000	15	22.1867	24.8446	21.722	25.0924	21.8955	25.5246
0.129497	0.21612	E5RGX5;Q93045;Q93045-2	E5RGX5;Q93045;Q93045-2	Stathmin;Stathmin-2	STMN2	1.886	8798100	2	22.1188	21.9024	22.8767	22.5263	21.5799	23.4401
1.75411	-1.00603	P53999;D6RC37;D6R970	P53999;D6RC37;D6R970	Activated RNA polymerase II transcriptional coactivator p15	SUB1	4.3891	1327700	4	22.9354	22.0996	22.4633	21.489	21.339	21.6521
0.380804	1.02101	P61956-2;P61956;A8MUA9;A8MU27;Q6EEV6;P55854;P55854-2	P61956-2;P61956;A8MUA9;A8MU27;Q6EEV6;P55854;P55854-2	Small ubiquitin-related modifier 2;Small ubiquitin-related modifier 4;Small ubiquitin-related modifier 3	SUMO2;SUMO3;SUMO4	4.2851	170500000	13	24.0092	21.0761	22.1572	24.7145	22.1786	23.4124
0.568558	0.704131	O60506-4;O60506-3;O60506-2;O60506;F6UXX1;B7Z645;O60506-5	O60506-4;O60506-3;O60506-2;O60506;F6UXX1;B7Z645;O60506-5	Heterogeneous nuclear ribonucleoprotein Q	SYNCRIP	7.3975	19862000	16	22.7261	21.9069	21.5337	22.2525	22.4266	23.6
0.0383767	-0.114972	A0A075B7D9;H3BPE7;P35637-2;P35637;Q92804-2;Q92804	A0A075B7D9;H3BPE7;P35637-2;P35637;Q92804-2;Q92804	RNA-binding protein FUS;TATA-binding protein-associated factor 2N	TAF15;FUS	2.224	3741600	1	21.6618	21.8701	24.2369	23.1364	21.2908	22.9966
0.422902	-0.369118	H0YCU9;Q01995	H0YCU9;Q01995	Transgelin	TAGLN	2.5499	9191000	4	22.0679	22.6103	22.2981	21.4536	21.8174	22.598
0.0131655	0.0232372	X6RJP6;P37802;P37802-2	X6RJP6;P37802;P37802-2	Transgelin-2	TAGLN2	20.232	31412000	15	21.3729	21.1041	22.5761	20.9729	22.1201	22.0299
0.406245	-0.405689	H7C5N2;C9J5W6;Q9UI15	H7C5N2;C9J5W6;Q9UI15	Transgelin-3	TAGLN3	10.984	15533000	9	21.7108	21.9555	22.449	21.7779	22.1775	20.9428
0.524773	0.471512	F2Z393;P37837	F2Z393;P37837	Transaldolase	TALDO1	2.2651	45696000	4	22.699	22.0834	22.278	22.2424	23.4551	22.7774
0.577366	-0.979909	K7EJ99;A0A0A0MSV7;K7EJM5;A0A087WX29;A0A1W2PNU8;A0A0A0N0M3;K7EN94;B1AKP7;G3V162;A0A087X260;A0A087WYY0;Q13148	K7EJ99;A0A0A0MSV7;K7EJM5;A0A087WX29;A0A1W2PNU8;A0A0A0N0M3;K7EN94;B1AKP7;G3V162;A0A087X260;A0A087WYY0;Q13148	TAR DNA-binding protein 43	TARDBP;TDP43	4.3525	29123000	11	23.3191	23.4233	24.1678	21.8498	24.0662	22.0545
1.19873	1.03171	P17987;F5H726;F5H676;F5H136;F5H282;E7EQR6;E7ERF2	P17987;F5H726;F5H676;F5H136;F5H282;E7EQR6;E7ERF2	T-complex protein 1 subunit alpha	TCP1	2.975	12538000	8	21.1875	20.5885	21.3205	22.0301	21.4993	22.6621
0.702158	0.107957	P02787;H7C5E8;F8WCI6;C9JB55;F8WEK9;C9JVG0;F8WC57;CON__Q2HJF0	P02787	Serotransferrin	TF	323.31	528070000000	1661	35.6206	35.7959	35.7508	35.8737	35.8799	35.7376
0.466513	-0.267277	Q15582;H0Y8L3;S4R3C6;H0Y9D7;H0YAB8;H0Y8M8;D6RBX4;H0YAH8	Q15582;H0Y8L3	Transforming growth factor-beta-induced protein ig-h3	TGFBI	323.31	850580000	129	27.3787	26.7004	26.6353	26.7243	26.6901	26.4982
0.94643	0.710692	Q03167-2;Q03167	Q03167-2;Q03167	Transforming growth factor beta receptor type 3	TGFBR3	3.312	11549000	5	21.4801	22.1809	21.4127	21.9052	22.5847	22.7158
0.0161471	0.0104987	Q5H9A7;P01033;H0Y789;Q5H9B5;Q5H9B4	Q5H9A7;P01033;H0Y789	Metalloproteinase inhibitor 1	TIMP1	64.366	438590000	37	25.9842	25.868	25.5389	25.6863	26.1423	25.594
1.59754	0.8808	P16035;B4DFW2;K7EIX4;K7EL90	P16035;B4DFW2	Metalloproteinase inhibitor 2	TIMP2	94.956	380090000	32	24.4958	25.2085	24.948	25.9423	25.8713	25.481
0.285422	0.102859	P29401;P29401-2;A0A0B4J1R6;E9PFF2;F8W888;F8WAX4	P29401;P29401-2;A0A0B4J1R6;E9PFF2	Transketolase	TKT	81.06	208870000	47	24.5854	24.5747	24.2364	24.5463	24.7332	24.4257
0.311563	0.476348	Q9Y490	Q9Y490	Talin-1	TLN1	2.4307	0	1	21.2025	21.931	22.7089	22.9934	21.5401	22.7379
0.444503	0.656657	I3L0A0;Q13404-8;Q15819;Q13404;Q13404-7;Q13404-2;Q13404-1;E5RIF1;D6RG00;H0YBX6;G3V2F7;G3V113;A0A0A0MSL3;H0YBP9;Q13404-6	I3L0A0;Q13404-8;Q15819;Q13404;Q13404-7;Q13404-2;Q13404-1;E5RIF1;D6RG00;H0YBX6;G3V2F7;G3V113	Ubiquitin-conjugating enzyme E2 variant 1;Ubiquitin-conjugating enzyme E2 variant 2	TMEM189-UBE2V1;UBE2V1;UBE2V2	23.782	45214000	12	21.3312	23.2938	21.5962	22.8262	22.422	22.9429
0.5112	0.956626	G5E972;P42167-3;P42167-2;P42167;P42166;H0YJH7	G5E972;P42167-3;P42167-2;P42167;P42166	Lamina-associated polypeptide 2, isoforms beta/gamma;Thymopoietin;Thymopentin;Lamina-associated polypeptide 2, isoform alpha;Thymopoietin;Thymopentin	TMPO	10.091	81423000	21	21.0454	23.3324	23.5112	23.9606	23.5467	23.2516
0.0184156	0.0325915	P63313	P63313	Thymosin beta-10	TMSB10	1.9136	21300000	7	21.918	22.4038	22.6112	21.6714	21.9227	23.4368
0.575567	1.46188	P62328	P62328	Thymosin beta-4;Hematopoietic system regulatory peptide	TMSB4X	11.345	197780000	9	20.8196	22.1628	23.1939	22.5331	25.3135	22.7153
0.485572	-1.04983	E9PC84;P24821-4;P24821;F5H7V9;J3QSU6;P24821-6;P24821-5;P24821-2;P24821-3;H0YGZ3	E9PC84;P24821-4;P24821;F5H7V9;J3QSU6;P24821-6;P24821-5;P24821-2;P24821-3;H0YGZ3	Tenascin	TNC	10.362	35505000	8	23.3983	23.3768	21.4206	20.8618	23.0196	21.1648
0.551619	0.36717	P60174-1;P60174;P60174-4;U3KQF3;U3KPZ0;U3KPS5	P60174-1;P60174;P60174-4	Triosephosphate isomerase	TPI1	203.61	1591000000	104	26.8174	27.5617	27.6888	27.951	27.6085	27.6099
0.25852	0.362296	Q9BW30	Q9BW30	Tubulin polymerization-promoting protein family member 3	TPPP3	15.929	2470900	2	21.928	22.6642	22.5118	21.7445	22.9919	23.4545
0.43191	-0.847196	Q5W0H4;A0A0B4J2C3;P13693;J3KPG2;E9PJF7;P13693-2;Q56UQ5	Q5W0H4;A0A0B4J2C3;P13693	Translationally-controlled tumor protein	TPT1	4.7615	50139000	6	21.9113	23.5781	23.6937	21.7177	23.4284	21.4954
0.557502	-3.1991	H7BXY6;Q8NG11	H7BXY6;Q8NG11	Tetraspanin;Tetraspanin-14	TSPAN14	1.9977	3703100000	16	27.0972	28.8707	30.5018	21.4938	25.7595	29.6191
0.565288	1.09007	Q9H2G4	Q9H2G4	Testis-specific Y-encoded-like protein 2	TSPYL2	15.888	136290000	9	22.271	22.9672	22.4517	25.2671	22.5038	23.1893
2.35972	2.50419	P02766;A0A087WT59;A0A087WV45	P02766;A0A087WT59;A0A087WV45	Transthyretin	TTR	323.31	44303000000	250	29.6762	28.4475	29.7458	31.8284	31.9288	31.6249
0.0285905	-0.0270761	Q71U36-2;Q71U36;P68363;F5H5D3;Q9BQE3;P68363-2;P0DPH8;P0DPH7;P68366-2;P68366;A0A1W2PQM2;P0DPH7-2;Q6PEY2;F8VQQ4;F8VVB9;C9J2C0;Q9NY65-2;Q9NY65;F8VRZ4;F8VS66;F8VX09;F8VWV9;V9GZ17;C9JEV8;C9JDS9;C9JQ00;C9JJQ8;F8VRK0;A6NHL2-2;A6NHL2;C9K0S6;C9JDL2;F8VXZ7;F8W0F6	Q71U36-2;Q71U36;P68363;F5H5D3;Q9BQE3;P68363-2;P0DPH8;P0DPH7;P68366-2;P68366;A0A1W2PQM2;P0DPH7-2;Q6PEY2	Tubulin alpha-1A chain;Tubulin alpha-1B chain;Tubulin alpha-1C chain;Tubulin alpha-4A chain;Tubulin alpha-3E chain	TUBA1A;TUBA1B;TUBA1C;TUBA4A;TUBA3E	187.67	1802000000	115	27.613	28.1599	27.5351	27.4997	28.2427	27.4843
0.176194	-0.133485	Q5JP53;P07437;Q5ST81	Q5JP53;P07437;Q5ST81	Tubulin beta chain	TUBB	160.27	537320000	34	25.648	26.6103	26.2066	26.1076	26.0719	25.8849
0.380123	0.811295	Q9BVA1;Q13885	Q9BVA1;Q13885	Tubulin beta-2B chain;Tubulin beta-2A chain	TUBB2B;TUBB2A	4.214	77826000	11	23.6254	22.0561	21.7993	24.6317	22.3031	22.9798
1.11029	1.60911	Q13509;A0A0B4J269;Q13509-2;G3V5W4;G3V2R8;G3V3R4;G3V2N6;G3V2A3;G3V3J6;G3V3W7;CON__ENSEMBL:ENSBTAP00000025008;Q9H4B7	Q13509;A0A0B4J269;Q13509-2	Tubulin beta-3 chain	TUBB3	17.922	87290000	24	21.1484	23.1438	23.1746	24.3309	23.9129	24.0503
0.262858	0.128892	P68371	P68371	Tubulin beta-4B chain	TUBB4B	125.68	1422600000	94	27.2535	27.7256	27.3572	27.8084	27.5674	27.3471
0.0969767	0.216252	Q9BUF5;K7ESM5;K7ES63	Q9BUF5;K7ESM5	Tubulin beta-6 chain	TUBB6	5.0869	42010000	7	23.5349	22.3463	22.6886	24.3162	21.8364	23.0659
0.95217	1.19939	Q3ZCM7;A0A075B736;Q5SQY0	Q3ZCM7;A0A075B736;Q5SQY0	Tubulin beta-8 chain	TUBB8	1.9427	3255500	2	22.3118	20.8197	22.7094	23.0321	23.4043	23.0026
0.316674	0.284044	F8W1Q9;F8VS81;Q12792;Q12792-3	F8W1Q9;F8VS81;Q12792;Q12792-3	Twinfilin-1	TWF1	2.1962	769470	1	22.1433	21.7914	22.5486	22.3955	21.9611	22.9788
0.316588	0.198114	P10599;P10599-2	P10599;P10599-2	Thioredoxin	TXN	22.909	648890000	28	25.9338	26.4067	26.217	26.5861	26.6139	25.9519
0.373174	-0.733472	K7EJH3;A0A1B0GW87;K7EJM7;M0QYK5;M0R2N4;P0DN76;Q01081-3;Q8WU68-3;Q8WU68-2;Q8WU68;Q01081-2;Q01081	K7EJH3;A0A1B0GW87;K7EJM7;M0QYK5;M0R2N4;P0DN76;Q01081-3;Q8WU68-3;Q8WU68-2;Q8WU68;Q01081-2;Q01081	Splicing factor U2AF 35 kDa subunit;Splicing factor U2AF 26 kDa subunit	U2AF1L4;U2AF1	2.493	7408600	8	23.1153	22.4984	22.4624	22.407	23.057	20.4117
0.0685667	0.0835527	K7ENG2;P26368-2;P26368	K7ENG2;P26368-2;P26368	Splicing factor U2AF 65 kDa subunit	U2AF2	9.9619	69966000	25	22.2807	23.6363	23.1903	23.4125	22.9308	23.0147
0.0584582	-0.0739638	P22314-2;P22314;Q5JRR6	P22314-2;P22314	Ubiquitin-like modifier-activating enzyme 1	UBA1	13.378	49478000	13	22.8056	22.5198	22.6377	22.9707	23.0488	21.7217
0.0974691	-0.447765	J3QS39;J3QTR3;F5H6Q2;F5GYU3;F5H2Z3;F5H265;B4DV12;F5H388;F5H747;F5GXK7;J3QKN0;Q5PY61;Q96C32;P62987;P62979;P0CG47;P0CG48;M0R1V7;Q49A90;M0R1M6;M0R2S1;A0A2R8Y422;J3QSA3;F5GZ39	J3QS39;J3QTR3;F5H6Q2;F5GYU3;F5H2Z3;F5H265;B4DV12;F5H388;F5H747;F5GXK7;J3QKN0;Q5PY61;Q96C32;P62987;P62979;P0CG47;P0CG48;M0R1V7;Q49A90;M0R1M6;M0R2S1;A0A2R8Y422	Ubiquitin-60S ribosomal protein L40;Ubiquitin;60S ribosomal protein L40;Ubiquitin-40S ribosomal protein S27a;Ubiquitin;40S ribosomal protein S27a;Polyubiquitin-B;Ubiquitin;Polyubiquitin-C;Ubiquitin	UBB;RPS27A;UBC;UBA52	125.17	386850000	23	25.4022	26.474	22.1142	25.388	25.0183	22.2409
0.370221	-0.688964	P61086-2;P61086-3;P61086	P61086-2;P61086-3;P61086	Ubiquitin-conjugating enzyme E2 K	UBE2K	1.9501	0	1	21.4037	23.5163	22.3582	20.8493	22.512	21.85
0.776268	-0.913464	P68036;P68036-3;P68036-2;A0A1B0GUS4	P68036;P68036-3;P68036-2	Ubiquitin-conjugating enzyme E2 L3	UBE2L3	9.2466	73011000	6	21.5451	23.2741	22.9938	21.5251	21.7963	21.7512
0.125609	-0.180024	F8VQQ8;P61088;Q5JXB2	F8VQQ8;P61088;Q5JXB2	Ubiquitin-conjugating enzyme E2 N;Putative ubiquitin-conjugating enzyme E2 N-like	UBE2N;UBE2NL	3.1194	58443000	9	21.8951	22.8571	23.2384	21.9101	23.0871	22.4534
0.0567132	0.106023	X6REH9	X6REH9		UBE2W	1.8438	73404000	0	21.332	22.9644	22.5389	21.7357	22.2408	23.1768
0.753248	-1.56869	A0A087WTZ5;E9PJ81;E9PRQ7;Q04323;Q04323-2	A0A087WTZ5;E9PJ81;E9PRQ7;Q04323;Q04323-2	UBX domain-containing protein 1	UBXN1	213.72	3219400	8	22.5938	22.4448	22.9664	21.4591	22.5256	19.3143
0.749831	0.554171	P09936;D6RE83;D6R956;D6R974;D6RF53	P09936;D6RE83;D6R956;D6R974	Ubiquitin carboxyl-terminal hydrolase isozyme L1;Ubiquitin carboxyl-terminal hydrolase	UCHL1	52.128	542290000	40	25.3065	26.0917	25.563	26.5829	26.3031	25.7377
0.814587	1.01495	P61960;H0Y614;P61960-2	P61960;H0Y614	Ubiquitin-fold modifier 1	UFM1	7.5345	45130000	6	21.9117	22.1527	21.4925	23.6103	23.1828	21.8086
0.368171	0.922909	Q9NYU2-2;Q9NYU2	Q9NYU2-2;Q9NYU2	UDP-glucose:glycoprotein glucosyltransferase 1	UGGT1	2.2642	2201700	2	21.5328	22.2135	18.9201	21.895	21.2512	22.2889
0.774098	-0.88316	C9JWG0;C9JVG3;C9JQU9;C9JNZ1;A0A087WYS1;E7EUC7;Q16851-2;Q16851;F2Z3H1;C9JTZ5;C9JUW1	C9JWG0;C9JVG3;C9JQU9;C9JNZ1;A0A087WYS1;E7EUC7;Q16851-2;Q16851;F2Z3H1;C9JTZ5;C9JUW1	UTP--glucose-1-phosphate uridylyltransferase	UGP2	6.2471	11915000	5	23.1521	22.4605	23.0007	22.7965	22.0381	21.1293
0.702033	-0.516157	M0QZZ6;M0QZE0;G8JLK1;Q9NZ43-3;Q9NZ43-2;Q9NZ43	M0QZZ6;M0QZE0;G8JLK1;Q9NZ43-3;Q9NZ43-2;Q9NZ43	Vesicle transport protein USE1	USE1	2.6594	0	2	22.2753	21.8522	22.575	21.8957	21.2028	22.0556
0.259205	0.265013	Q9P0L0;Q9P0L0-2;E5RK64;O95292-2;O95292	Q9P0L0;Q9P0L0-2;E5RK64;O95292-2;O95292	Vesicle-associated membrane protein-associated protein A;Vesicle-associated membrane protein-associated protein B/C	VAPA;VAPB	4.5167	33647000	8	22.6948	21.4542	22.2886	22.1983	22.2657	22.7686
1.19907	-2.15747	Q6EMK4	Q6EMK4	Vasorin	VASN	2.0897	13442000	2	23.656	23.501	23.9828	22.3649	22.4138	19.8886
1.4024	-0.588319	P13611-2;P13611;E9PF17;P13611-4;P13611-3;P13611-5;D6RGZ6;Q86W61	P13611-2;P13611;E9PF17;P13611-4;P13611-3;P13611-5;D6RGZ6;Q86W61	Versican core protein	VCAN	98.663	898360000	73	27.3622	27.0091	26.8017	26.2686	26.6341	26.5054
0.615079	0.511736	P18206-2;P18206;A0A096LPE1;P18206-3	P18206-2;P18206	Vinculin	VCL	13.132	51239000	13	22.0558	22.7637	22.6782	23.4722	23.1119	22.4489
0.434415	0.475536	P55072;C9JUP7;C9IZA5	P55072	Transitional endoplasmic reticulum ATPase	VCP	38.347	167880000	45	23.9952	24.5815	23.8756	25.1	24.9796	23.7993
0.0510847	-0.053929	P08670;B0YJC4;B0YJC5;A0A1B0GTT5;P17661;H7C5W5;E7EMV2;E7ESP9;P41219;P41219-2;Q16352;P07197-2;P07197;A0A1B0GVG8;F8W835;P07196;P12036-2;P12036	P08670;B0YJC4	Vimentin	VIM	129.46	977930000	68	26.9676	27.628	26.4717	26.8168	27.2472	26.8416
0.138883	-0.233377	P23381-2;P23381;H0YJP3;G3V3H8;G3V3Y5;G3V277	P23381-2;P23381;H0YJP3	Tryptophan--tRNA ligase, cytoplasmic;T1-TrpRS;T2-TrpRS	WARS	10.359	48404000	15	23.6046	22.2811	22.4666	21.6514	22.8048	23.196
0.824764	1.14462	O14980;C9JKM9;H7BZC5;C9IZS4;C9JQ02;C9JV99;C9J673	O14980;C9JKM9	Exportin-1	XPO1	4.5695	4493600	4	22.3542	20.2742	21.5574	22.6445	22.1253	22.8498
0.337879	-0.564413	P13010;C9JZ81	P13010;C9JZ81	X-ray repair cross-complementing protein 5	XRCC5	19.122	9905400	10	21.3347	21.8524	22.0071	22.481	20.4129	20.6069
0.314377	-0.639847	B1AHC9;P12956;P12956-2	B1AHC9;P12956;P12956-2	X-ray repair cross-complementing protein 6	XRCC6	10.483	15242000	12	21.8923	23.0873	22.4345	21.2437	23.334	20.9169
0.68653	-1.33993	H0Y449;P67809;A0A0D9SEI8;P16989-2;P16989-3;P16989;C9J5V9;Q9Y2T7	H0Y449;P67809;A0A0D9SEI8;P16989-2;P16989-3;P16989	Nuclease-sensitive element-binding protein 1;Y-box-binding protein 3	YBX1;YBX3	53.216	63705000	17	22.5152	24.08	23.875	23.5985	21.6884	21.1635
0.556195	0.631158	P31946-2;P31946;Q4VY20;Q4VY19;A0A0J9YWE8;A0A0J9YWZ2	P31946-2;P31946	14-3-3 protein beta/alpha;14-3-3 protein beta/alpha, N-terminally processed	YWHAB	89.506	214760000	46	24.1133	24.8254	23.8875	24.1826	24.9132	25.6239
0.733583	0.605967	P62258;P62258-2;K7EIT4;B4DJF2;I3L3T1;K7EM20;I3L0W5	P62258;P62258-2	14-3-3 protein epsilon	YWHAE	323.31	2628900000	154	27.4567	28.4659	27.7772	28.7591	28.7197	28.0389
0.26294	0.277273	P61981;P31947-2;P31947	P61981	14-3-3 protein gamma;14-3-3 protein gamma, N-terminally processed	YWHAG	146.38	326940000	43	24.9401	25.8656	24.4705	25.5003	25.4227	25.1851
0.123127	0.0722968	Q04917;A2IDB2	Q04917;A2IDB2	14-3-3 protein eta	YWHAH	9.5538	50101000	19	22.3151	23.0154	22.6161	22.7002	22.6116	22.8517
0.398569	0.449725	P27348;E9PG15	P27348;E9PG15	14-3-3 protein theta	YWHAQ	323.31	472620000	60	24.8539	26.2815	25.2891	25.9374	26.3027	25.5335
1.16793	0.647254	P63104;E7EX29;B0AZS6;P63104-2;B7Z2E6;H0YB80;E7ESK7;E5RIR4;E9PD24;E7EVZ2;E5RGE1	P63104;E7EX29;B0AZS6;P63104-2;B7Z2E6;H0YB80	14-3-3 protein zeta/delta	YWHAZ	323.31	2420500000	95	27.3875	28.1296	27.9177	28.7131	28.427	28.2364
0.137442	-0.229862	Q4KWH8-2	Q4KWH8-2			2.6954	0	3	22.4984	22.5379	22.1993	21.3324	23.3614	21.8522
0.580543	0.850569	Q96MC5-2	Q96MC5-2			1.771	35909000	9	21.7505	21.9102	21.9716	21.6898	22.5704	23.9239

## Sheet: Y366Lfs vs CTRL
Significance	Difference	Protein IDs	Majority protein IDs	Protein names	Gene names	Score	Intensity	MS/MS count	CTRL1	CTRL2	CTRL3	Y366Lfs_1	Y366Lfs_2	Y366Lfs_3
0.740757	-1.36461	P01023;H0YFH1;P20742-2;P20742	P01023	Alpha-2-macroglobulin	A2M	165.04	170520000	60	24.7705	24.5231	24.5564	21.6241	24.4355	23.6966
2.13477	0.960779	P49588;P49588-2;H3BPK7	P49588;P49588-2;H3BPK7	Alanine--tRNA ligase, cytoplasmic	AARS	2.4912	11090000	3	21.0444	21.5103	21.3255	22.5095	22.0524	22.2007
0.591147	0.724881	Q9BWD1;Q9BWD1-2	Q9BWD1;Q9BWD1-2	Acetyl-CoA acetyltransferase, cytosolic	ACAT2	33.123	84682000	31	22.3547	23.5795	23.5273	23.6013	23.4148	24.62
0.214988	0.457148	G5E9R5;P24666-4;P24666;F2Z2Q9;D3YTI2;P24666-3;P24666-2	G5E9R5;P24666-4;P24666;F2Z2Q9;D3YTI2;P24666-3;P24666-2	Low molecular weight phosphotyrosine protein phosphatase	ACP1	4.5674	6224500	8	22.2372	20.386	22.9567	21.7524	22.8235	22.3755
0.327918	1.88371	P68133;P68032;P63267;P62736;A6NL76;F8WB63;B8ZZJ2;C9JFL5;F6UVQ4;F6QUT6	P68133;P68032;P63267;P62736;A6NL76	Actin, alpha skeletal muscle;Actin, alpha cardiac muscle 1;Actin, gamma-enteric smooth muscle;Actin, aortic smooth muscle	ACTA1;ACTC1;ACTG2;ACTA2	18.088	756190000	14	20.905	22.8752	26.9282	22.7806	28.1903	25.3886
0.610684	-0.64743	P60709;A0A2R8Y793;P63267-2;Q6S8J3;A0A2R8YEA7;E7EVS6;A0A2R8YGF8;A5A3E0;G5E9R0;Q562R1;A0A2R8YFE2;C9JUM1;C9JZR7;Q9BYX7;P0CG38;C9JTX5;P0CG39;F8WCH0	P60709;A0A2R8Y793	Actin, cytoplasmic 1;Actin, cytoplasmic 1, N-terminally processed	ACTB	29.696	64633000	10	23.1259	23.9084	22.3878	22.2849	22.8579	22.3368
0.23164	-0.149807	P63261;I3L3I0;I3L1U9;I3L4N8;I3L3R2;K7EM38;J3KT65	P63261;I3L3I0;I3L1U9;I3L4N8	Actin, cytoplasmic 2;Actin, cytoplasmic 2, N-terminally processed	ACTG1	323.31	6375200000	209	29.4559	29.7504	29.5077	28.9979	29.8172	29.4495
0.232505	-0.562702	H9KV75;P12814-2;P12814;P12814-3;P12814-4;G3V2W4;G3V2N5;P35609-2;P35609;F6THM6;G3V2E8;G3V5M4;G3V2X9;A0A087WSZ2;Q08043	H9KV75;P12814-2;P12814;P12814-3;P12814-4;G3V2W4	Alpha-actinin-1	ACTN1	2.5941	2539800	1	22.7355	21.5687	23.9037	23.3236	21.0054	22.1908
0.294058	0.47952	O43707;O43707-2;F5GXS2;O43707-3;H7C144;K7EJH8;H0YJ11;H0YJW3;H7C5W8;K7EP19;M0QZQ3;C9JY79;Q9H254-2;Q9H254-4;Q9H254	O43707;O43707-2	Alpha-actinin-4	ACTN4	56.941	203660000	57	24.1053	24.5014	24.4835	24.3972	24.0121	26.1193
0.0784678	-0.0514412	B4DXW1;P61158;F8WDR7;A0A0A0MTI9;H7C4J1;C9IZN3;Q9C0K3;Q9P1U1-2;Q9P1U1-3;Q9P1U1	B4DXW1;P61158;F8WDR7;A0A0A0MTI9;H7C4J1;C9IZN3;Q9C0K3;Q9P1U1-2;Q9P1U1-3;Q9P1U1	Actin-related protein 3;Actin-related protein 3C;Actin-related protein 3B	ACTR3;ACTR3C;ACTR3B	3.3983	13444000	2	22.0001	22.5655	22.5779	22.442	22.4778	22.0694
0.425036	-0.775607	G3V3F8;G3V597;P07311-2;P07311	G3V3F8;G3V597;P07311-2;P07311	Acylphosphatase-1	ACYP1	4.4187	3859200	6	21.94	23.7813	21.8937	22.5394	21.8317	20.9172
0.246175	0.437044	C9J6H5;C9JPM3;F8WC54;A0AVL1;Q13443-2;Q13443	C9J6H5;C9JPM3;F8WC54;A0AVL1;Q13443-2;Q13443	Disintegrin and metalloproteinase domain-containing protein 9	ADAM9	4.4522	30634000	6	23.6656	21.6943	22.4652	22.4969	22.804	23.8353
0.0831705	0.102815	Q9UHI8	Q9UHI8	A disintegrin and metalloproteinase with thrombospondin motifs 1	ADAMTS1	31.056	27083000	5	22.0127	23.2495	22.1368	22.6744	22.8357	22.1975
0.00687307	-0.0180066	Q8IUX7-2;Q8IUX7	Q8IUX7-2;Q8IUX7	Adipocyte enhancer-binding protein 1	AEBP1	9.1468	9622800	8	23.3364	21.4931	22.1029	23.2577	21.011	22.6097
0.685358	-1.89563	J3KMX3;P02771;CON__Q3SZ57	J3KMX3;P02771	Alpha-fetoprotein	AFP	323.31	25597000000	376	31.1609	31.2363	31.5506	27.8141	31.8881	28.5587
0.377604	-0.493383	O00468-6;O00468-3;O00468-5;O00468-4;O00468-7;O00468;A0A087X208;O00468-2;H0Y5U1	O00468-6;O00468-3;O00468-5;O00468-4;O00468-7;O00468;A0A087X208;O00468-2	Agrin;Agrin N-terminal 110 kDa subunit;Agrin C-terminal 110 kDa subunit;Agrin C-terminal 90 kDa fragment;Agrin C-terminal 22 kDa fragment	AGRN	27.614	43490000	19	22.0694	23.0183	22.834	21.4009	23.0014	22.0393
0.158553	0.224964	P23526-2;P23526	P23526-2;P23526	Adenosylhomocysteinase	AHCY	48.654	195330000	31	23.7633	24.9016	24.7164	24.7609	23.9608	25.3346
0.813405	1.02637	Q09666	Q09666	Neuroblast differentiation-associated protein AHNAK	AHNAK	4.7624	73744000	11	23.1053	22.0472	22.029	22.8882	23.0295	24.3429
0.242892	-0.739941	C9JV77;P02765	C9JV77;P02765	Alpha-2-HS-glycoprotein;Alpha-2-HS-glycoprotein chain A;Alpha-2-HS-glycoprotein chain B	AHSG	18.664	212770000	18	23.5255	24.2398	24.3073	21.2231	25.2968	23.3329
0.20822	0.614154	H0YID2;Q5T9B7;P00568	H0YID2;Q5T9B7;P00568	Adenylate kinase isoenzyme 1	AK1	2.2382	4179400	1	21.0879	22.578	20.8176	20.106	23.0569	23.1632
0.430569	-0.668881	P14550;V9GYG2;V9GYP9;Q5T621	P14550;V9GYG2;V9GYP9;Q5T621	Alcohol dehydrogenase [NADP(+)]	AKR1A1	2.6103	21591000	2	22.8607	22.8907	21.909	22.7722	22.0903	20.7913
0.307344	-0.558443	E9PCX2;P15121	E9PCX2;P15121	Aldose reductase	AKR1B1	4.6357	26665000	6	22.4053	23.0641	24.1073	23.497	21.6105	22.7939
0.329097	0.556056	P04075;P04075-2;J3KPS3;H3BQN4;H3BPS8;H3BR68;H3BUH7;H3BR04;H3BU78;H3BMQ8;A0A087WXX2;A0A3B3IS80;P05062	P04075;P04075-2;J3KPS3;H3BQN4;H3BPS8	Fructose-bisphosphate aldolase A;Fructose-bisphosphate aldolase	ALDOA	156.21	753780000	104	25.5486	26.8796	26.0375	26.0617	26.211	27.8612
0.369053	-0.516375	P09972;A8MVZ9;K7EKH5;J3KSV6;J3QKP5;C9J8F3	P09972;A8MVZ9	Fructose-bisphosphate aldolase C;Fructose-bisphosphate aldolase	ALDOC	14.415	8379400	7	22.0819	23.3346	21.9664	21.9058	21.2924	22.6356
0.222694	0.462688	E9PB61;Q86V81	E9PB61;Q86V81	THO complex subunit 4	ALYREF	2.0472	30185000	5	22.0763	21.4782	22.2389	23.752	21.0597	22.3697
0.186456	0.460162	H0YN26;P39687;H7BZ09;O95626;O43423	H0YN26;P39687	Acidic leucine-rich nuclear phosphoprotein 32 family member A	ANP32A	18.989	206610000	14	22.937	24.9243	24.7829	23.3262	25.6167	25.0817
0.284707	0.419017	Q92688-2;Q92688	Q92688-2;Q92688	Acidic leucine-rich nuclear phosphoprotein 32 family member B	ANP32B	3.9594	14558000	4	22.768	21.853	21.7187	22.5624	23.3716	21.6627
0.603678	-0.569321	P04083;Q5T3N1;Q5T3N0	P04083;Q5T3N1;Q5T3N0	Annexin A1;Annexin	ANXA1	43.501	94113000	19	22.7579	23.6332	23.2394	22.762	22.0038	23.1567
0.658906	-0.470099	P07355;P07355-2;H0YN42;H0YKS4;H0YMD0;H0YMU9;A6NMY6;H0YMM1;H0YM50;H0YKZ7;H0YLV6;H0YMT9;H0YKX9;H0YMW4;H0YKL9;H0YNP5;H0YKV8;H0YN28;H0YL33;H0YN52;H0YMD9;H0YNA0;H0YLE2;H0YNB8;H0YKN4	P07355;P07355-2;H0YN42;H0YKS4;H0YMD0;H0YMU9;A6NMY6;H0YMM1;H0YM50;H0YKZ7;H0YLV6;H0YMT9;H0YKX9;H0YMW4	Annexin A2;Annexin;Putative annexin A2-like protein	ANXA2;ANXA2P2	91.478	630850000	58	26.7108	26.465	26.5307	25.5404	26.1268	26.6291
0.485459	-1.37204	P08758;D6RBE9;D6RBL5;E9PHT9	P08758;D6RBE9;D6RBL5	Annexin A5;Annexin	ANXA5	96.336	145450000	23	24.3584	25.0005	24.3052	20.7875	24.0914	24.669
0.127627	-0.19847	E5RK69;P08133-2;P08133;E7EMC6;H0YC77;E5RFF0	E5RK69;P08133-2;P08133;E7EMC6	Annexin;Annexin A6	ANXA6	8.1498	30271000	12	22.1617	22.7024	22.9764	23.4478	21.9614	21.836
0.21043	0.32971	F5GZ08;B7Z4G8;P51693;P51693-2;S4R3U6;K7EQJ4;K7ELK0;K7EMN4	F5GZ08;B7Z4G8;P51693;P51693-2;S4R3U6;K7EQJ4	Amyloid-like protein 1;C30	APLP1	50.069	55760000	18	23.2034	23.3756	22.2495	22.3414	23.4415	24.0346
1.18366	-3.96222	P02647;F8W696	P02647;F8W696	Apolipoprotein A-I;Proapolipoprotein A-I;Truncated apolipoprotein A-I	APOA1	323.31	3849100000	105	28.3636	28.3084	29.9294	22.8087	27.766	24.14
0.0299545	0.0667127	Q8NCW5-2;Q8NCW5;Q5T3I4;Q5T3I3	Q8NCW5-2;Q8NCW5;Q5T3I4;Q5T3I3	NAD(P)H-hydrate epimerase	APOA1BP	2.4768	3862800	4	21.7991	21.1434	23.0156	21.9627	22.9791	21.2165
0.12864	-0.229019	V9GYM3;P02652;V9GYE3;V9GYG9;V9GYC1;V9GYS1	V9GYM3;P02652;V9GYE3;V9GYG9	Apolipoprotein A-II;Proapolipoprotein A-II;Truncated apolipoprotein A-II	APOA2	113.6	34404000	11	21.4699	23.5715	22.4529	22.1894	22.7214	21.8964
0.414461	-0.689789	P06727;CON__Q32PJ2	P06727	Apolipoprotein A-IV	APOA4	29.063	185810000	26	23.7254	23.3347	25.1112	23.9469	23.6941	22.4609
0.177453	-0.307376	P04114;A8MUN2	P04114	Apolipoprotein B-100;Apolipoprotein B-48	APOB	38.422	9635200	9	22.5109	23.7443	21.834	23.0317	22.291	21.8444
0.384234	-0.463207	B0YIW2;P02656	B0YIW2;P02656	Apolipoprotein C-III	APOC3	127.45	11982000	5	22.7114	22.2523	23.495	21.6607	22.823	22.5853
0.789474	-2.29368	P02649;E9PEV4;E7ERP7;H0Y7L5;CON__Q03247	P02649;E9PEV4;E7ERP7;H0Y7L5	Apolipoprotein E	APOE	193.47	265280000	22	21.9678	24.701	26.4984	21.9473	21.7518	22.5871
1.26593	0.533743	P05067-11;P05067-8;P05067;P05067-7;P05067-9;E9PG40;H7C0V9	P05067-11;P05067-8;P05067;P05067-7;P05067-9;E9PG40;H7C0V9	Amyloid beta A4 protein;N-APP;Soluble APP-alpha;Soluble APP-beta;C99;Beta-amyloid protein 42;Beta-amyloid protein 40;C83;P3(42);P3(40);C80;Gamma-secretase C-terminal fragment 59;Gamma-secretase C-terminal fragment 57;Gamma-secretase C-terminal fragment 50;C31	APP	151.01	1198500000	146	26.5715	27.1361	26.8214	27.5006	27.154	27.4757
0.117873	0.422147	F5H423;P84077;P61204;F5H0C7;P61204-2	F5H423;P84077;P61204;F5H0C7;P61204-2	ADP-ribosylation factor 1;ADP-ribosylation factor 3	ARF1;ARF3	22.267	50697000	13	20.5286	21.6623	23.7606	20.7537	23.8338	22.6304
0.827332	-0.739038	J3KRE2;J3KTF8;J3QQX2;P52565	J3KRE2;J3KTF8;J3QQX2;P52565	Rho GDP-dissociation inhibitor 1	ARHGDIA	3.5863	21652000	5	22.7541	22.4314	23.2763	22.7144	21.5859	21.9444
0.928543	-1.25594	P25705-2;P25705;P25705-3;K7EK77;K7EJP1;K7ERX7;K7EQH4;K7ENJ4	P25705-2;P25705;P25705-3;K7EK77;K7EJP1;K7ERX7	ATP synthase subunit alpha, mitochondrial	ATP5A1	11.656	31001000	13	22.4286	23.9592	23.3516	22.824	21.2843	21.8634
0.00312031	-0.00794156	P06576;F8W079;H0YH81;H0YI37;F8W0P7	P06576;F8W079;H0YH81	ATP synthase subunit beta, mitochondrial;ATP synthase subunit beta	ATP5B	59.048	44086000	14	23.0486	23.6337	21.3256	22.8043	23.3782	21.8015
0.89018	1.23513	A6QRJ1;Q15904;H7C2Y8;A6NLC6	A6QRJ1;Q15904;H7C2Y8;A6NLC6	V-type proton ATPase subunit S1	ATP6AP1	8.4508	14659000	9	22.8898	21.9204	21.3277	22.4132	23.4545	23.9756
0.137599	0.167203	B7Z1I9;A0A1B0GVB9;A0A1B0GVW0;A0A1C7CYW4;O75787-2;O75787;A0A1B0GWD6;A0A1B0GVI9;A0A1B0GVC7;A0A1B0GU12;B7Z413;A0A1B0GTU8;A0A1B0GUT7;A0A1B0GWJ8;H7C3E1;A0A1B0GTB0;A0A1B0GUV3;A0A1B0GV24;A0A1B0GW13;A0A1B0GV60	B7Z1I9;A0A1B0GVB9;A0A1B0GVW0;A0A1C7CYW4;O75787-2;O75787;A0A1B0GWD6;A0A1B0GVI9;A0A1B0GVC7;A0A1B0GU12;B7Z413;A0A1B0GTU8;A0A1B0GUT7;A0A1B0GWJ8;H7C3E1;A0A1B0GTB0	Renin receptor	ATP6AP2	9.7996	43502000	23	22.7239	22.4652	22.3837	22.8203	21.8783	23.3757
1.09917	-0.620241	P61769;H0YLF3;F5H6I0	P61769;H0YLF3;F5H6I0	Beta-2-microglobulin;Beta-2-microglobulin form pI 5.3	B2M	193.26	1679800000	67	28.1774	27.7683	28.1165	27.7441	27.5006	26.9568
0.0550734	0.0852915	P15291-2;P15291	P15291-2;P15291	Beta-1,4-galactosyltransferase 1;Lactose synthase A protein;N-acetyllactosamine synthase;Beta-N-acetylglucosaminylglycopeptide beta-1,4-galactosyltransferase;Beta-N-acetylglucosaminyl-glycolipid beta-1,4-galactosyltransferase;Processed beta-1,4-galactosyltransferase 1	B4GALT1	4.8877	57504000	7	22.8859	22.5399	23.0702	22.371	23.9388	22.4422
0.634031	0.778728	O43505	O43505	Beta-1,4-glucuronyltransferase 1	B4GAT1	18.689	64750000	20	22.4287	22.8929	22.8736	23.9199	24.157	22.4544
0.999983	1.56298	P80723;P80723-2	P80723;P80723-2	Brain acid soluble protein 1	BASP1	156.55	122840000	46	22.8198	23.4524	22.6007	24.0354	23.6494	25.877
1.70428	2.93188	P00918;E5RID5;E5RK37	P00918	Carbonic anhydrase 2	CA2	35.425	112720000	16	22.3345	22.9578	21.935	26.1366	23.9027	25.9836
0.0741303	0.103938	Q9HB71-3;Q9HB71	Q9HB71-3;Q9HB71	Calcyclin-binding protein	CACYBP	3.2847	9842300	3	22.3762	21.1008	22.7048	22.1158	22.1042	22.2736
1.19304	1.36525	F8WBR5;M0QZ52;G3V479;P0DP25;P0DP24;P0DP23;H0Y7A7;E7ETZ0;E7EMB3;P27482;C9J7T9;P02585	F8WBR5;M0QZ52;G3V479;P0DP25;P0DP24;P0DP23;H0Y7A7;E7ETZ0;E7EMB3;P27482	Calmodulin-like protein 3	CALM2;CALM3;CALM1;CALML3	18.125	55287000	14	21.5095	22.9916	21.4832	23.1233	23.1946	23.7622
0.659897	-0.388161	P27797;K7EJB9;K7EL50	P27797;K7EJB9	Calreticulin	CALR	89.334	285030000	47	24.9959	25.4171	25.0839	24.4061	25.2083	24.7181
0.897333	1.14179	O43852;O43852-3;O43852-2;O43852-4;H0Y875;O43852-15;O43852-10;O43852-6;O43852-9;O43852-5;O43852-13;O43852-14;O43852-11;O43852-12;O43852-7;O43852-8	O43852;O43852-3;O43852-2;O43852-4;H0Y875;O43852-15;O43852-10;O43852-6;O43852-9;O43852-5	Calumenin	CALU	32.991	84312000	22	21.885	23.5711	23.1096	24.3404	23.3685	24.2823
0.242898	0.800027	Q86VP6;Q86VP6-2;A0A0C4DGH5;H0YH27;Q86VP6-3	Q86VP6;Q86VP6-2;A0A0C4DGH5	Cullin-associated NEDD8-dissociated protein 1	CAND1	21.754	113330000	33	23.2474	23.9668	22.3158	21.6059	24.7493	25.5748
0.192199	0.455367	Q5T0R7;Q5T0R6;Q5T0R5;Q5T0R4;Q5T0R3;Q5T0R2;Q5T0R1;Q01518;Q5T0R9;Q01518-2	Q5T0R7;Q5T0R6;Q5T0R5;Q5T0R4;Q5T0R3;Q5T0R2;Q5T0R1;Q01518;Q5T0R9;Q01518-2	Adenylyl cyclase-associated protein;Adenylyl cyclase-associated protein 1	CAP1	6.6797	27362000	4	21.8136	23.2593	21.4368	21.2256	23.6064	23.0438
0.0470106	-0.0372779	P52907	P52907	F-actin-capping protein subunit alpha-1	CAPZA1	11.685	28612000	15	22.1648	22.5761	22.4919	22.0071	22.2866	22.8273
0.277596	0.359833	P47755;C9JUG7;F8W9N7;A0A0D9SET8;P47755-2	P47755;C9JUG7;F8W9N7;A0A0D9SET8;P47755-2	F-actin-capping protein subunit alpha-2	CAPZA2	3.4344	31694000	6	21.926	21.3789	22.2248	21.639	21.8595	23.1108
0.42019	-1.05624	B1AK85;P47756-2;P47756;B1AK87;B1AK88	B1AK85;P47756-2;P47756;B1AK87;B1AK88	F-actin-capping protein subunit beta	CAPZB	8.1348	2516700	5	22.929	23.7923	21.6735	23.3739	21.4841	20.3681
1.58341	1.18149	Q9Y2V2;H3BSW7;H3BUY4;H3BPY5;H3BNU9	Q9Y2V2;H3BSW7;H3BUY4;H3BPY5;H3BNU9	Calcium-regulated heat stable protein 1	CARHSP1	2.3606	7905100	3	21.3229	21.8197	21.7496	23.1068	22.2015	23.1285
0.313303	-0.266426	P04040	P04040	Catalase	CAT	18.224	126900000	28	24.0354	24.7237	23.7302	24.1871	23.5511	23.9519
0.0871945	-0.201045	B5MD17;J3KS05;P83916;K7ELA4;C9JWS9;Q13185	B5MD17;J3KS05;P83916;K7ELA4	Chromobox protein homolog 1	CBX1	20.615	75124000	11	23.0225	23.6748	23.5641	21.6524	23.7854	24.2204
0.532176	-0.465484	P45973;F8VNY3	P45973;F8VNY3	Chromobox protein homolog 5	CBX5	18.28	12345000	7	22.2807	23.4785	22.7507	22.069	22.6358	22.4087
0.169782	-0.298815	A0A0A6YYA4;Q96M83	A0A0A6YYA4;Q96M83	Coiled-coil domain-containing protein 7	CCDC7	4.6027	53831000	4	22.3882	23.8636	21.6684	22.3421	22.6131	22.0687
0.406603	-0.376427	F8VQ14;F5GWF6;P78371	F8VQ14;F5GWF6;P78371	T-complex protein 1 subunit beta	CCT2	12.706	18149000	10	21.6126	22.7994	22.5248	21.6877	22.2347	21.8852
0.446896	0.270703	B4DUR8;P49368-2;P49368	B4DUR8;P49368-2;P49368	T-complex protein 1 subunit gamma	CCT3	3.2309	842410	2	22.3583	22.6863	21.9401	22.8321	22.331	22.6337
0.526276	0.368511	P50991-2;P50991	P50991-2;P50991	T-complex protein 1 subunit delta	CCT4	14.627	14498000	11	21.4711	21.6949	21.876	22.619	21.7651	21.7634
0.0314311	-0.0456874	E7ENZ3;B7ZAR1;E9PCA1;P48643-2;P48643	E7ENZ3;B7ZAR1;E9PCA1;P48643-2;P48643	T-complex protein 1 subunit epsilon	CCT5	21.402	28517000	16	22.0111	22.6323	22.5993	22.5764	23.0166	21.5127
0.174615	0.14725	P40227;P40227-2	P40227;P40227-2	T-complex protein 1 subunit zeta	CCT6A	35.631	26111000	5	22.151	21.8792	21.2502	21.5695	22.162	21.9906
0.239104	0.397815	P50990-2;P50990;H7C4C8;P50990-3	P50990-2;P50990;H7C4C8;P50990-3	T-complex protein 1 subunit theta	CCT8	2.5376	3085800	2	21.6511	22.6189	21.7082	21.2555	23.1239	22.7923
0.92027	1.21278	K7EIU0;K7EQA9;Q16543	K7EIU0;K7EQA9;Q16543	Hsp90 co-chaperone Cdc37;Hsp90 co-chaperone Cdc37, N-terminally processed	CDC37	2.0231	6652200	3	21.6297	21.5385	21.2599	21.5923	23.6821	22.792
0.409445	0.597862	P60953;Q5JYX0;P60953-1	P60953;Q5JYX0;P60953-1	Cell division control protein 42 homolog	CDC42	3.1586	15522000	5	22.0131	21.4535	22.8109	22.1259	23.6427	22.3024
0.972095	-2.30642	P55287-2;P55287;H3BUU9;H3BQH2;J3KTG8;J3QKW5;J3QLE6;F5H5X9;J3KRI5;X6R3Y6;Q9ULB5;P55286	P55287-2;P55287;H3BUU9	Cadherin-11	CDH11	258.26	222200000	52	25.4985	24.6556	25.5051	22.871	24.7964	21.0725
0.4184	-0.515711	P19022;C9J8J8;P19022-2;C9JMH2;C9J126	P19022;C9J8J8;P19022-2	Cadherin-2	CDH2	12.195	397970000	42	25.6013	26.051	25.9174	25.121	26.3095	24.5921
0.532682	-0.543127	P55283-2;P55283	P55283-2;P55283	Cadherin-4	CDH4	2.8209	4590800	1	23.1636	22.4151	22.7131	21.715	22.995	21.9525
0.928457	0.380472	E7ETN3;B4E1Z4;P00751;H7C5H1;A0A0G2JH38;P00751-2	E7ETN3;B4E1Z4;P00751;H7C5H1;A0A0G2JH38	Complement factor B;Complement factor B Ba fragment;Complement factor B Bb fragment	CFB	73.162	54107000	19	22.9823	22.6551	22.3995	23.2338	22.9286	23.0159
1.12735	0.701864	G3XAM2;E7ETH0;P05156;A0A2R8Y3M9;A0A087X0I2;D6R9Z8;CON__Q32PI4	G3XAM2;E7ETH0;P05156;A0A2R8Y3M9	Complement factor I;Complement factor I heavy chain;Complement factor I light chain	CFI	286.66	797210000	78	25.9558	26.4036	26.7474	27.3532	26.7301	27.129
0.0178816	-0.0193265	P23528;G3V1A4;E9PP50;E9PK25;E9PQB7;E9PLJ3;E9PS23;Q9Y281-3;Q9Y281	P23528;G3V1A4;E9PP50;E9PK25;E9PQB7	Cofilin-1	CFL1	181.01	1133400000	80	26.7242	27.4644	27.1792	26.5369	27.4694	27.3036
0.379552	-0.443816	P10645;G5E968	P10645;G5E968	Chromogranin-A;Vasostatin-1;Vasostatin-2;EA-92;ES-43;Pancreastatin;SS-18;WA-8;WE-14;LF-19;Catestatin;AL-11;GV-19;GR-44;ER-37;GE-25;Serpinin-RRG;Serpinin;p-Glu serpinin precursor	CHGA	2.3598	12196000	3	22.8653	23.2174	21.9989	22.8514	21.7058	22.193
1.02975	0.670202	P05060;A0A0A0MT66	P05060;A0A0A0MT66	Secretogranin-1;PE-11;GAWK peptide;CCB peptide	CHGB	19.899	39369000	9	21.4493	22.1895	21.96	22.1143	22.8023	22.6928
0.459077	-1.24485	Q70JA7	Q70JA7	Chondroitin sulfate synthase 3	CHSY3	17.245	1840100	1	22.7397	23.0817	22.5111	19.2632	23.0734	22.2613
0.151077	-0.451525	P12277;G3V4N7;H0YJG0;G3V461;G3V2I1;H0YJK0	P12277;G3V4N7	Creatine kinase B-type	CKB	173.88	658760000	62	25.5408	26.0453	26.309	24.1881	27.6791	24.6732
0.795114	0.532817	Q9Y240	Q9Y240	C-type lectin domain family 11 member A	CLEC11A	2.1952	14266000	3	21.9664	21.8202	22.6983	22.5055	22.9871	22.5908
1.22408	-0.803118	O00299	O00299	Chloride intracellular channel protein 1	CLIC1	40.336	137610000	29	24.3115	23.8086	24.6843	23.1365	23.7341	23.5244
0.28414	-0.397895	Q9Y696	Q9Y696	Chloride intracellular channel protein 4	CLIC4	16.899	38388000	10	22.4424	22.6072	23.334	22.5104	21.4904	23.1892
0.613022	0.392727	O94985-2;O94985;Q5SR54;A0A3B3ITY6	O94985-2;O94985;Q5SR54	Calsyntenin-1;Soluble Alc-alpha;CTF1-alpha	CLSTN1	104.4	661580000	80	25.7949	26.3363	26.1253	26.0855	26.9153	26.434
0.0996268	0.0901248	Q9H4D0	Q9H4D0	Calsyntenin-2	CLSTN2	3.0196	11301000	4	21.2084	22.1594	22.1025	21.9558	21.7188	22.066
0.146991	-0.352466	Q9BQT9;Q9BQT9-2	Q9BQT9;Q9BQT9-2	Calsyntenin-3	CLSTN3	21.488	28710000	9	22.1182	24.266	22.5204	22.9685	23.434	21.4446
0.59476	0.586635	A0A087WVQ6;Q00610-2;Q00610;J3KS13;A0A087WX41;P53675-2;P53675;J3KRF5;K7EJJ5	A0A087WVQ6;Q00610-2;Q00610	Clathrin heavy chain;Clathrin heavy chain 1	CLTC	15.99	43078000	13	22.0656	22.5865	22.814	23.0164	23.7633	22.4462
1.70933	0.854479	P10909-4;P10909;P10909-5;P10909-2;P10909-3;H0YAS8;H0YC35;H0YLK8;E5RG36;E5RGB0;E5RH61;E5RJZ5;E7ERK6;E7ETB4	P10909-4;P10909;P10909-5;P10909-2;P10909-3;H0YAS8	Clusterin;Clusterin beta chain;Clusterin alpha chain	CLU	123.43	730320000	37	26.5307	26.0556	26.0236	26.9274	26.8773	27.3686
1.18302	-1.43448	P30085-2;P30085	P30085-2;P30085	UMP-CMP kinase	CMPK1	6.5547	5628800	5	22.4135	23.1666	23.1406	20.55	21.5412	22.3261
0.540091	0.480811	Q96KP4-2;Q96KP4;J3KSS4;J3QRP4;J3QQN6;J3QR27;J3QLU1;J3QKQ0;J3QRD0;J3QRA8;J3QL02;J3KSV5;A0A087WYZ1;J3QKT2	Q96KP4-2;Q96KP4;J3KSS4;J3QRP4;J3QQN6;J3QR27;J3QLU1;J3QKQ0;J3QRD0;J3QRA8;J3QL02;J3KSV5;A0A087WYZ1;J3QKT2	Cytosolic non-specific dipeptidase	CNDP2	2.041	4695000	2	22.0412	22.6036	21.5219	22.1196	22.5436	22.9459
0.373684	-0.748696	E9PDU6;Q15417-3;Q15417-2;Q15417	E9PDU6;Q15417-3;Q15417-2;Q15417	Calponin;Calponin-3	CNN3	5.3822	6247400	2	22.0059	23.0812	22.0285	23.141	20.7655	20.963
0.588579	-0.428027	Q5T8H6;P26992	Q5T8H6;P26992	Ciliary neurotrophic factor receptor subunit alpha	CNTFR	2.4382	10480000	5	22.4377	23.3177	22.3031	22.1328	22.351	22.2906
0.070193	-0.102354	A0A1W2PQ86;A0A1W2PQ11;Q02246;A0A1B0GTL7;A0A1W2PQJ4;A0A1W2PPQ9;A0A1W2PR60	A0A1W2PQ86;A0A1W2PQ11;Q02246;A0A1B0GTL7	Contactin-2	CNTN2	13.462	36081000	14	23.5185	23.2384	22.2326	22.6257	23.5473	22.5094
1.55082	-2.11495	P12107-4;P12107-3;P12107;P12107-2;H7C381;C9JMN2;A0A2R8Y4M5;A0A2R8Y4I5;A0A2R8Y5N4;A0A2R8YDU3	P12107-4;P12107-3;P12107;P12107-2;H7C381;C9JMN2;A0A2R8Y4M5;A0A2R8Y4I5;A0A2R8Y5N4;A0A2R8YDU3	Collagen alpha-1(XI) chain	COL11A1	78.389	49786000	12	24.7606	23.5074	22.8963	21.3983	22.2087	21.2123
1.17287	-1.0196	A0A087X0K0;P39059	A0A087X0K0;P39059	Collagen alpha-1(XV) chain;Restin;Restin-2;Restin-3;Restin-4	COL15A1	139.22	1293100000	93	28.1924	27.6611	27.3393	27.0082	27.0625	26.0633
0.332687	1.25168	P39060-2;P39060-1;P39060;H7BXV5;H7C457	P39060-2;P39060-1;P39060;H7BXV5;H7C457	Collagen alpha-1(XVIII) chain;Endostatin	COL18A1	7.5982	8919300	9	21.93	20.1895	23.3512	25.4966	22.4215	21.3077
0.722049	-1.27186	P02452;CON__Q862S4;I3L3H7	P02452	Collagen alpha-1(I) chain	COL1A1	323.31	8547000000	306	31.0831	30.3216	30.0883	30.3072	29.5799	27.7904
0.755853	-0.982243	A0A087WTA8;P08123	A0A087WTA8;P08123	Collagen alpha-2(I) chain	COL1A2	323.31	11711000000	395	31.4394	30.4615	30.6036	30.5005	30.2189	28.8384
0.196356	-0.278192	P02458-1;P02458	P02458-1;P02458	Collagen alpha-1(II) chain;Collagen alpha-1(II) chain;Chondrocalcin	COL2A1	3.4107	0	1	22.6196	21.9959	23.165	22.2001	23.1057	21.6401
0.833108	-1.17941	P02461;P02461-2;H7C435	P02461;P02461-2	Collagen alpha-1(III) chain	COL3A1	323.31	16751000000	472	31.9684	31.0715	31.1772	30.9921	30.6264	29.0604
1.25933	-2.47804	A0A3B3ISV3;P02462	A0A3B3ISV3;P02462	Collagen alpha-1(IV) chain;Arresten	COL4A1	78.863	106320000	23	25.1868	23.6886	24.2278	20.8082	23.4819	21.3791
1.08291	-2.47646	P08572;A0A3B3IS47;A0A3B3IRV2;A0A3B3IT80;A0A3B3ITQ8	P08572	Collagen alpha-2(IV) chain;Canstatin	COL4A2	17.421	185490000	23	25.6482	24.4828	25.0583	21.6289	24.6275	21.5035
0.458539	-0.862633	P20908;P20908-2;H7BY82	P20908;P20908-2	Collagen alpha-1(V) chain	COL5A1	323.31	2629100000	181	29.0271	28.254	28.2838	28.7034	28.1205	26.1531
1.23988	-1.08807	P05997;A0A087WYX9;A0A3B3IRH9	P05997;A0A087WYX9	Collagen alpha-2(V) chain	COL5A2	323.31	1285800000	107	28.2006	27.1287	27.6321	26.6891	26.9628	26.0453
0.767515	-0.548132	A0A087X0S5;P12109	A0A087X0S5;P12109	Collagen alpha-1(VI) chain	COL6A1	323.31	3529500000	219	29.2034	28.9099	28.7364	28.709	28.6929	27.8035
0.921794	-0.970378	P12110;P12110-3;P12110-2;C9JH44;H7C0M5	P12110;P12110-3;P12110-2	Collagen alpha-2(VI) chain	COL6A2	177.98	476160000	43	26.6057	26.0375	26.1512	25.5198	25.9545	24.4091
1.61845	-1.50364	P12111-2;P12111;E7ENL6;P12111-4;P12111-3;P12111-5;C9JNG9	P12111-2;P12111;E7ENL6;P12111-4	Collagen alpha-3(VI) chain	COL6A3	323.31	603490000	121	27.0572	26.3374	26.5369	24.601	25.841	24.9786
2.76049	-1.04715	M0QXB4;O14579-2;O14579	M0QXB4;O14579-2;O14579	Coatomer subunit epsilon	COPE	3.0262	2479500	1	22.58	22.8325	22.8866	21.8546	21.7885	21.5145
0.689761	-0.621665	H0Y8X7;Q9Y678	H0Y8X7;Q9Y678	Coatomer subunit gamma-1	COPG1	2.4547	5005300	5	22.2334	22.7869	22.7397	21.2286	22.3973	22.2691
1.57098	-1.60173	F8VXB1;F8VUC5;F8W156;F8W651;F8VYZ4;F8VVA7;P61923-5;P61923	F8VXB1;F8VUC5;F8W156;F8W651;F8VYZ4;F8VVA7;P61923-5;P61923	Coatomer subunit zeta-1	COPZ1	2.1879	11081000	7	24.6308	23.2211	23.6651	22.5593	22.3251	21.8274
0.116148	0.0954189	Q9ULV4;Q9ULV4-2;Q9ULV4-3;B4E3S0;F8W1H8;F8VUX3;F8VSA4;F8VRE9;H0YHL7;F8VTT6;F8VVB7	Q9ULV4;Q9ULV4-2;Q9ULV4-3;B4E3S0	Coronin-1C;Coronin	CORO1C	1.9662	8405400	5	22.0642	22.8402	21.9998	22.2967	22.6501	22.2436
1.11535	-0.910791	H3BT58;Q14019	H3BT58;Q14019	Coactosin-like protein	COTL1	74.599	77526000	18	23.4826	24.3068	23.1652	23.0258	22.4132	22.7833
0.540749	0.383256	P16870-2;P16870;D6RF88;C9JE88;D6R930;H0YAM0	P16870-2;P16870	Carboxypeptidase E	CPE	93.046	594490000	86	25.3923	25.6372	26.3343	26.0372	26.4418	26.0345
0.252301	-1.14416	P29762;B5MCB5	P29762	Cellular retinoic acid-binding protein 1	CRABP1	145.66	544840000	44	25.4542	26.3506	25.7595	21.3007	27.3	25.5311
0.178119	0.385824	P29373;Q5SYZ4	P29373;Q5SYZ4	Cellular retinoic acid-binding protein 2	CRABP2	62.733	55009000	7	21.9379	22.7098	23.6866	22.0836	23.0812	24.3269
0.819243	0.667386	P46109	P46109	Crk-like protein	CRKL	1.8231	2862000	2	22.2892	21.9026	22.6069	23.4086	22.3309	23.0613
0.369437	-0.453017	E9PD68;Q14194;Q14194-2	E9PD68;Q14194;Q14194-2	Dihydropyrimidinase-related protein 1	CRMP1	3.4489	18987000	6	21.3574	22.4994	22.7437	22.2521	21.7204	21.2691
0.528611	-0.702576	P55060-2;P55060-4;P55060-3;P55060	P55060-2;P55060-4;P55060-3;P55060	Exportin-2	CSE1L	7.6996	3566900	4	21.9524	22.7884	23.7617	22.0312	21.7352	22.6284
0.45717	0.382584	P01034	P01034	Cystatin-C	CST3	65.464	938370000	35	26.4894	26.3583	26.9553	26.9534	27.5389	26.4584
0.727245	-0.507563	A0A1W2PS52;P04080	A0A1W2PS52;P04080	Cystatin-B	CSTB	7.2503	63115000	9	23.2269	22.3463	23.301	22.4052	22.3224	22.624
0.0093026	-0.0237122	E5RGG4;E5RJ43;E5RGS1;A0A087WZL6;E5RGU3;E5RHJ5;E5RFG3;E5RFK9;E5RFM5;E5RJP7;E5RGD2;G3XAM7;P35221-3;P35221;P35221-2	E5RGG4;E5RJ43;E5RGS1;A0A087WZL6;E5RGU3;E5RHJ5;E5RFG3;E5RFK9;E5RFM5;E5RJP7;E5RGD2;G3XAM7;P35221-3;P35221;P35221-2	Catenin alpha-1	CTNNA1	3.3638	4619600	3	21.1649	22.3847	23.9936	22.3665	22.8483	22.2571
0.119686	-0.191256	P07858;R4GMQ5	P07858	Cathepsin B;Cathepsin B light chain;Cathepsin B heavy chain	CTSB	11.341	75519000	19	23.3316	22.2966	23.4202	21.9288	23.4326	23.1132
0.143587	-0.229939	P07711	P07711	Cathepsin L1;Cathepsin L1 heavy chain;Cathepsin L1 light chain	CTSL	4.1108	38439000	9	21.2994	22.3477	22.5313	21.1561	21.6397	22.6928
1.36045	0.75831	O60888-3;O60888;O60888-2;C9IZG4;C9IZQ5	O60888-3;O60888;O60888-2;C9IZG4	Protein CutA	CUTA	155.71	285380000	34	24.7074	24.1935	24.4648	25.0547	24.9487	25.6371
0.160918	0.306538	C9JFR7;P99999	C9JFR7;P99999	Cytochrome c	CYCS	3.1094	4895300	3	20.8672	22.5856	22.3225	22.4276	22.9399	21.3275
1.28757	-0.885139	Q14118;C9JYS1;C9J196;C9JQL4	Q14118	Dystroglycan;Alpha-dystroglycan;Beta-dystroglycan	DAG1	32.332	325720000	36	25.8673	25.5694	25.8219	24.4182	25.459	24.726
1.80478	-1.33976	P07585;P07585-2;F8VXZ8;F8VUF6;F8VWU0;P07585-4;P07585-3;F8VX58;H0YI87;H0YIH3;F8VNV6	P07585;P07585-2	Decorin	DCN	323.31	3334700000	127	29.725	29.0947	28.8286	28.229	27.8599	27.54
0.145197	-0.179455	O95865;A0A140T971;Q5SSV3;Q5SRR8;H0Y7N1	O95865;A0A140T971;Q5SSV3;Q5SRR8	N(G),N(G)-dimethylarginine dimethylaminohydrolase 2	DDAH2	18.548	36232000	11	22.0284	23.3765	22.3329	22.0959	22.8032	22.3004
5.36754e-05	-3.87828e-05	A0A1X7SBZ2;A0A1W2PQ51;Q92841-1;Q92841-3;Q92841-2;Q92841	A0A1X7SBZ2;A0A1W2PQ51;Q92841-1;Q92841-3;Q92841-2;Q92841	Probable ATP-dependent RNA helicase DDX17	DDX17	16.676	2122500	10	22.3422	22.1523	22.3475	22.2049	22.7052	21.9318
0.552845	0.612391	H0Y400;A0A140T9X3;A0A0G2JJZ9;Q5STU3;O00148;Q13838;Q13838-2;H0YCC6;A0A140T9X9;A0A140T996;F6UJC5;A0A140TA18;F6WLT2;O00148-2	H0Y400;A0A140T9X3;A0A0G2JJZ9;Q5STU3;O00148;Q13838;Q13838-2;H0YCC6;A0A140T9X9;A0A140T996;F6UJC5;A0A140TA18;F6WLT2;O00148-2	ATP-dependent RNA helicase DDX39A;Spliceosome RNA helicase DDX39B	DDX39B;DDX39A	13.837	14885000	4	22.2527	22.2057	22.4297	22.0048	23.0511	23.6694
0.458126	-1.06304	Q5HYB6;P06753-5;P06753-2;A0A087WWU8;P06753-4;P06753-3;P06753-6;Q5VU61;J3KN67;D6R904;P06753-7;P06753;D6RFM2	Q5HYB6;P06753-5;P06753-2;A0A087WWU8;P06753-4;P06753-3;P06753-6;Q5VU61;J3KN67;D6R904;P06753-7;P06753	Tropomyosin alpha-3 chain	DKFZp686J1372;TPM3	69.341	152660000	24	23.991	24.9798	24.3071	21.4541	24.1761	24.4586
0.0514677	0.174311	H0Y7V4;A0A075B6F3;Q96JB1-2;Q96JB1	H0Y7V4;A0A075B6F3;Q96JB1-2;Q96JB1	Dynein heavy chain 8, axonemal	DNAH8	10.24	116870000	17	23.7506	22.531	23.7229	21.3793	24.1495	24.9987
1.60865	1.10418	Q9C005	Q9C005	Protein dpy-30 homolog	DPY30	8.7647	26814000	9	21.5094	21.4684	21.9324	22.7594	23.2115	22.2518
0.30982	0.206011	A0A1C7CYX9;Q16555;Q16555-2;E5RFU4;D6RF19	A0A1C7CYX9;Q16555;Q16555-2	Dihydropyrimidinase-related protein 2	DPYSL2	69.588	251410000	55	24.6793	25.3196	24.5568	24.8752	25.3166	24.9819
0.658805	0.744832	Q14195;Q14195-2;H0YBT4;H0YB87;Q14117	Q14195;Q14195-2;H0YBT4	Dihydropyrimidinase-related protein 3	DPYSL3	3.1235	4381000	4	22.3905	21.7864	22.3596	23.7656	22.8754	22.13
0.12661	0.1649	Q8NBI3	Q8NBI3	Draxin	DRAXIN	4.6245	42181000	7	22.3316	22.1798	22.0655	22.0962	23.2716	21.7038
0.329497	-0.488574	Q02487-2;Q02487;A0A3B3ISU0	Q02487-2;Q02487;A0A3B3ISU0	Desmocollin-2	DSC2	20.992	46584000	11	22.7494	22.7077	23.8421	21.6644	23.2623	22.9068
0.057664	0.204343	Q14574-2;Q14574	Q14574-2;Q14574	Desmocollin-3	DSC3	13.317	134270000	13	22.0714	23.428	24.7619	24.8154	24.3072	21.7518
1.17832	-1.06311	Q14126;J3KSI6	Q14126	Desmoglein-2	DSG2	205.73	659640000	70	26.9007	26.519	26.9173	25.5892	26.4699	25.0886
0.338056	-0.452513	E9PGG1;E7EU01;E7EUM4;E7ERR6;E7ERH4;E7ET01;E7ETL8;E7EQU2;E7ESD3;E7EMU4;E7EV09;E7EQL5;Q13409-6;Q13409-3;Q13409-7;Q13409-2;Q13409-5;Q13409	E9PGG1;E7EU01;E7EUM4;E7ERR6;E7ERH4;E7ET01;E7ETL8;E7EQU2;E7ESD3;E7EMU4;E7EV09;E7EQL5;Q13409-6;Q13409-3;Q13409-7;Q13409-2;Q13409-5;Q13409	Cytoplasmic dynein 1 intermediate chain 2	DYNC1I2	21.059	8245200	8	23.5821	22.0111	21.911	21.8291	22.2113	22.1062
0.0402635	-0.0541801	P30084	P30084	Enoyl-CoA hydratase, mitochondrial	ECHS1	2.49	9706400	2	21.9847	21.9323	23.1026	21.8499	22.2828	22.7244
1.25092	-0.709649	Q5VTE0;P68104;A0A087WVQ9;P68104-2;A0A087WV01;A0A2U3TZH3;Q05639;A0A2R8Y488;A0A2R8Y660;Q5JR01;A6PW80;A0A2R8YDN5	Q5VTE0;P68104;A0A087WVQ9;P68104-2;A0A087WV01;A0A2U3TZH3;Q05639	Putative elongation factor 1-alpha-like 3;Elongation factor 1-alpha 1;Elongation factor 1-alpha;Elongation factor 1-alpha 2	EEF1A1P5;EEF1A1;EEF1A2	106.12	504940000	94	26.3693	26.05	25.9734	24.9936	25.8126	25.4575
0.331953	0.491212	F8WF65;F2Z2G2;C9JZW3;P24534	F8WF65;F2Z2G2;C9JZW3;P24534	Elongation factor 1-beta	EEF1B2	29.475	32681000	10	22.071	21.701	22.2374	23.4731	22.572	21.438
0.437068	0.597221	E9PK01;A0A087X1X7;E9PRY8;P29692;P29692-2;E9PQZ1;P29692-3;P29692-4;E9PQC9;H0YE58;H0YE72;E9PPR1;E9PL12;E9PQ49;E9PI39;E9PMW7;E9PIZ1;E9PK06;E9PL71;H0YCK7	E9PK01;A0A087X1X7;E9PRY8;P29692;P29692-2;E9PQZ1;P29692-3;P29692-4;E9PQC9;H0YE58;H0YE72;E9PPR1;E9PL12;E9PQ49;E9PI39	Elongation factor 1-delta	EEF1D	25.467	24060000	14	22.9148	21.9412	21.9335	23.2005	23.4803	21.9005
0.123116	-0.281701	P26641;P26641-2	P26641;P26641-2	Elongation factor 1-gamma	EEF1G	17.8	51309000	15	21.8197	23.9637	23.1003	22.0015	23.7864	22.2508
0.425819	0.31969	P13639	P13639	Elongation factor 2	EEF2	23.634	165150000	37	24.6852	23.5825	24.1413	24.4775	24.5083	24.3822
0.0545236	0.119297	A0A0U1RQV3;Q12805-5;Q12805-2;Q12805-4;Q12805-3;Q12805	A0A0U1RQV3;Q12805-5;Q12805-2;Q12805-4;Q12805-3;Q12805	EGF-containing fibulin-like extracellular matrix protein 1	EFEMP1	2.8592	23130000	6	22.4364	21.9721	24.3462	22.6593	23.3565	23.0968
1.29094	0.666803	P60842;J3QR64;J3KTB5;J3QL43;J3QS69;J3KT12;P60842-2;J3KTN0;J3QLN6;J3KSZ0;E7EQG2;Q14240;Q14240-2;J3KT04;J3KS93;E7EMV8;J3KSN7;J3QKZ9;J3KS25	P60842;J3QR64;J3KTB5;J3QL43;J3QS69;J3KT12;P60842-2;J3KTN0;J3QLN6;J3KSZ0;E7EQG2;Q14240;Q14240-2	Eukaryotic initiation factor 4A-I;Eukaryotic initiation factor 4A-II;Eukaryotic initiation factor 4A-II, N-terminally processed	EIF4A1;EIF4A2	17.858	43439000	9	22.4544	22.0701	21.7414	22.8197	22.9365	22.51
0.024932	-0.0448424	F8W0K0;F8VYE9;F8VSC7;F8VP89;F8VX11;E7EX17;P23588-2;P23588	F8W0K0;F8VYE9;F8VSC7;F8VP89;F8VX11;E7EX17;P23588-2;P23588	Eukaryotic translation initiation factor 4B	EIF4B	2.5807	7264900	2	21.2219	22.4209	23.2941	22.3173	22.184	22.3011
0.77393	-0.630813	Q15056-2;Q15056	Q15056-2;Q15056	Eukaryotic translation initiation factor 4H	EIF4H	1.9503	4855900	2	22.796	21.8046	21.972	21.9198	21.1695	21.5908
0.34802	-0.618935	I3L397;I3L504;Q6IS14;P63241;F8WCJ1;C9J7B5;C9J4W5;Q9GZV4;P63241-2	I3L397;I3L504;Q6IS14;P63241;F8WCJ1;C9J7B5;C9J4W5;Q9GZV4;P63241-2	Eukaryotic translation initiation factor 5A;Eukaryotic translation initiation factor 5A-1-like;Eukaryotic translation initiation factor 5A-1;Eukaryotic translation initiation factor 5A-2	EIF5A;EIF5AL1;EIF5A2	4.8728	45956000	13	22.461	22.1509	23.8535	23.2409	21.634	21.7336
0.615344	0.751947	A0A0U1RQP7;Q8N8S7-3;Q8N8S7-2;Q8N8S7	A0A0U1RQP7;Q8N8S7-3;Q8N8S7-2;Q8N8S7	Protein enabled homolog	ENAH	19.357	6274000	10	21.415	21.5975	23.0723	22.9251	22.4593	22.9563
0.01618	0.0177301	P06733;A0A2R8Y6G6;P06733-2;K7EM90;A0A2R8Y879;A0A2R8YEM5;K7ERS8;A0A2R8Y798;A0A2R8YEG5;A0A2R8Y6I8	P06733;A0A2R8Y6G6;P06733-2	Alpha-enolase	ENO1	323.31	3279900000	170	28.1036	29.0851	28.7179	28.2829	28.6208	29.0562
0.0638653	0.165178	P09104-2;P09104;F5H0C8;P13929-3;P13929-2;P13929;E5RI09;E5RG95;K7EPM1;K7EKN2;E5RGZ4;F5H1C3	P09104-2;P09104;F5H0C8;P13929-3;P13929-2;P13929	Gamma-enolase;Enolase;Beta-enolase	ENO2;ENO3	78.348	91168000	17	22.5131	24.6151	22.8483	23.503	22.4111	24.558
0.28525	0.310994	E7EUF1;Q13822;Q13822-3;Q13822-2;E5RJ49;E5RIA2	E7EUF1;Q13822;Q13822-3;Q13822-2;E5RJ49;E5RIA2	Ectonucleotide pyrophosphatase/phosphodiesterase family member 2	ENPP2	6.3219	36665000	12	22.1649	22.2564	23.4609	23.1251	22.669	23.0211
0.421022	0.460773	Q9NZ08;Q9NZ08-2	Q9NZ08;Q9NZ08-2	Endoplasmic reticulum aminopeptidase 1	ERAP1	5.5562	3589200	2	22.9753	21.8262	22.0959	22.2293	22.7408	23.3097
0.0964237	-0.35792	P84090;G3V279	P84090;G3V279	Enhancer of rudimentary homolog	ERH	125.19	93890000	10	22.4658	22.4533	24.17	20.6164	22.6276	24.7713
0.270633	0.467294	P30040;F8VY02	P30040	Endoplasmic reticulum resident protein 29	ERP29	10.21	9314700	8	21.9181	23.3247	20.9969	22.2669	22.7246	22.6501
0.262435	-0.286048	H7BY36;A0A0D9SFL3;B0QYK0;C9JGE3;Q01844-2;Q01844-6;Q01844-3;Q01844;Q01844-5	H7BY36;A0A0D9SFL3;B0QYK0;C9JGE3;Q01844-2;Q01844-6;Q01844-3;Q01844;Q01844-5	RNA-binding protein EWS	EWSR1	6.4202	16503000	3	23.0149	22.0621	22.2055	21.5064	22.4371	22.4809
1.41246	-0.473749	E7EQR4;P15311;E9PQ82;E9PNV3;A0A2R8Y5P0	E7EQR4;P15311	Ezrin	EZR	126.62	564670000	67	26.293	26.1457	26.4168	25.5711	26.0387	25.8245
1.08122	-1.16762	P07148;A8MW49;Q9NQV6-6	P07148;A8MW49;Q9NQV6-6	Fatty acid-binding protein, liver	FABP1	112.05	133260000	24	23.7287	24.1285	24.6549	23.0559	23.7218	22.2315
0.64722	1.51172	Q01469;I6L8B7;A8MUU1	Q01469;I6L8B7	Fatty acid-binding protein, epidermal	FABP5	57.099	63346000	19	21.3015	22.2052	22.231	22.2078	22.6356	25.4295
0.716918	1.27975	O15540;O15540-2	O15540;O15540-2	Fatty acid-binding protein, brain	FABP7	28.599	171540000	22	22.5688	23.8957	23.4085	23.4392	25.9027	24.3703
0.0781244	-0.0538902	Q92520;C9JP35;C9JMN4	Q92520;C9JP35;C9JMN4	Protein FAM3C	FAM3C	21.998	159500000	29	24.6363	23.9747	24.5554	24.5407	24.3549	24.109
0.598397	-0.829441	A0A0U1RQF0;P49327	A0A0U1RQF0;P49327	Fatty acid synthase;[Acyl-carrier-protein] S-acetyltransferase;[Acyl-carrier-protein] S-malonyltransferase;3-oxoacyl-[acyl-carrier-protein] synthase;3-oxoacyl-[acyl-carrier-protein] reductase;3-hydroxyacyl-[acyl-carrier-protein] dehydratase;Enoyl-[acyl-carrier-protein] reductase;Oleoyl-[acyl-carrier-protein] hydrolase	FASN	9.3927	4523300	4	21.3251	22.3706	22.9778	21.8739	20.6233	21.6879
0.501364	-0.271228	B1AHL2;P23142-4;P23142-2;P23142-3;B1AHM7;H7C1M6;B1AHM9;B1AHN3;B1AHM8	B1AHL2;P23142-4	Fibulin-1	FBLN1	323.31	1934400000	86	28.1769	28.2237	27.9237	28.238	27.4917	27.7809
1.06458	-1.7375	P23142;CON__ENSEMBL:ENSBTAP00000016046	P23142	Fibulin-1	FBLN1	20.562	273300000	21	25.5838	24.4989	25.8283	24.5274	22.3297	23.8413
0.192173	-0.254862	P98095;P98095-2	P98095;P98095-2	Fibulin-2	FBLN2	2.4447	19855000	5	22.242	22.3649	22.0787	22.8551	21.1184	21.9475
1.50899	-2.17435	A0A087WYV8;P35556	A0A087WYV8;P35556	Fibrillin-2	FBN2	14.662	117870000	17	24.8662	24.4689	24.8106	21.5122	23.7564	22.3541
0.205604	0.410617	P02671-2;P02671;A0A087WUA0	P02671-2;P02671;A0A087WUA0	Fibrinogen alpha chain;Fibrinopeptide A;Fibrinogen alpha chain	FGA	30.224	143140000	21	21.7489	23.4059	22.4687	22.008	24.0782	22.7691
0.140605	0.302139	P02675;D6REL8	P02675;D6REL8	Fibrinogen beta chain;Fibrinopeptide B;Fibrinogen beta chain	FGB	65.776	159810000	22	22.5297	22.705	22.6593	22.12	24.5211	22.1594
0.251952	-0.332139	Q8TAT2	Q8TAT2	Fibroblast growth factor-binding protein 3	FGFBP3	103.89	34838000	7	23.0418	22.6513	21.7679	21.4881	22.735	22.2414
0.453573	1.2227	C9JEU5;C9JC84;P02679-2;P02679;C9JPQ9;C9JU00	C9JEU5;C9JC84;P02679-2;P02679	Fibrinogen gamma chain	FGG	49.243	148970000	29	22.464	21.8344	21.5771	21.4721	25.3199	22.7516
0.365697	0.373034	A0A1B0GVK0;Q14314	A0A1B0GVK0;Q14314	Fibroleukin	FGL2	3.2591	9198600	9	22.8398	21.4031	21.9848	22.2799	22.498	22.5689
0.409849	-0.572604	P07954-2;P07954	P07954-2;P07954	Fumarate hydratase, mitochondrial	FH	2.0239	15994000	5	22.8664	23.0087	22.1333	21.0482	22.5176	22.7248
0.609348	-0.807993	Q5W0X3;A0A087WZM5;P62942	Q5W0X3;A0A087WZM5;P62942	Peptidyl-prolyl cis-trans isomerase;Peptidyl-prolyl cis-trans isomerase FKBP1A	FKBP1A	13.369	19980000	9	22.7742	24.0152	22.68	23.1694	21.9193	21.9567
0.361113	0.921605	Q00688;G3V5F2	Q00688	Peptidyl-prolyl cis-trans isomerase FKBP3	FKBP3	19.36	96794000	22	20.6968	23.8376	23.4481	22.9014	23.577	24.2688
0.11493	-0.31399	Q02790	Q02790	Peptidyl-prolyl cis-trans isomerase FKBP4;Peptidyl-prolyl cis-trans isomerase FKBP4, N-terminally processed	FKBP4	4.8596	21353000	7	23.5324	23.1601	22.475	21.6634	21.9418	24.6203
0.833837	0.48763	Q60FE5;P21333-2;P21333;A0A087WWY3;H0Y5F3;H0Y5C6;F8WE98;O75369-5;O75369-4;O75369-6;O75369-3;O75369-2;O75369-9;O75369;O75369-8	Q60FE5;P21333-2;P21333;A0A087WWY3	Filamin-A	FLNA	25.051	94103000	31	23.9028	23.7816	23.6035	24.4089	23.7477	24.5942
0.191364	-0.238502	Q14315-2;Q14315	Q14315-2;Q14315	Filamin-C	FLNC	4.8272	11503000	6	22.8909	21.5796	22.3962	21.798	22.6211	21.7321
0.0613173	-0.116948	A0A3B3IRN5;Q06828	A0A3B3IRN5;Q06828	Fibromodulin	FMOD	8.871	9391100	4	23.1629	23.5987	21.8671	21.9617	23.3183	22.9978
1.07745	-0.435992	P02751-17;P02751-3;P02751;P02751-6;P02751-5;P02751-10;P02751-9;P02751-14;P02751-8;P02751-4;P02751-12;H0Y7Z1;P02751-16;P02751-2;H0Y4K8	P02751-17;P02751-3;P02751;P02751-6;P02751-5;P02751-10;P02751-9;P02751-14;P02751-8;P02751-4;P02751-12;H0Y7Z1	Fibronectin;Anastellin;Ugl-Y1;Ugl-Y2;Ugl-Y3	FN1	323.31	3683400000	271	28.8935	28.6103	29.1383	28.2175	28.5641	28.5526
0.402503	0.510542	C9JYK2;E9PGA7;Q9Y2L6-2;Q9Y2L6	C9JYK2;E9PGA7;Q9Y2L6-2;Q9Y2L6	FERM domain-containing protein 4B	FRMD4B	5.7359	88300000	4	22.5587	21.8126	22.1165	22.8836	23.3998	21.736
0.266106	-0.267565	Q16658;C9JPH9;C9JFC0;A0A0A0MSB2	Q16658	Fascin	FSCN1	35.218	220700000	28	24.8481	24.6224	24.9527	24.0106	25.3003	24.3095
0.17583	-0.358908	Q12841-2;Q12841	Q12841-2;Q12841	Follistatin-related protein 1	FSTL1	5.972	105550000	10	23.396	23.2158	24.3794	23.2626	24.5112	22.1407
0.591458	-0.563606	E9PEB5;Q96AE4;Q96AE4-2;C9JSZ1	E9PEB5;Q96AE4;Q96AE4-2;C9JSZ1	Far upstream element-binding protein 1	FUBP1	40.535	2481000	5	22.796	21.8406	22.9596	22.2639	21.4845	22.157
0.476369	-0.775074	H0YGU9;H0YFU9;A0A3B3ISG8;Q9NY28	H0YGU9;H0YFU9;A0A3B3ISG8;Q9NY28	Probable polypeptide N-acetylgalactosaminyltransferase 8	GALNT8	4.0644	13386000	0	22.1112	23.709	22.2731	22.9001	21.5067	21.3614
0.692741	-0.919959	Q14697;Q14697-2;F5H6X6;E9PKU7;E9PNH1	Q14697;Q14697-2;F5H6X6;E9PKU7	Neutral alpha-glucosidase AB	GANAB	54.294	43741000	13	22.0832	22.5571	23.455	21.8878	22.5004	20.9473
1.3644	1.59438	P17677;P17677-2	P17677;P17677-2	Neuromodulin	GAP43	106.87	54094000	27	21.1192	22.3491	21.4896	23.5101	22.4492	23.7817
0.635742	-0.381231	P04406;P04406-2;E7EUT5;O14556	P04406;P04406-2;E7EUT5	Glyceraldehyde-3-phosphate dehydrogenase	GAPDH	207.77	1451700000	139	27.488	27.9601	27.3416	26.9357	27.5921	27.1181
0.949652	-0.823882	A0A1W2PQV2;H3BUH9;P23434	A0A1W2PQV2;H3BUH9;P23434	Glycine cleavage system H protein, mitochondrial	GCSH	1.9881	0	1	23.1671	23.5476	22.2134	22.1973	21.9863	22.2729
0.178353	-0.122598	Q99988	Q99988	Growth/differentiation factor 15	GDF15	3.7218	7414200	4	22.0909	22.9056	22.1812	22.1996	22.3438	22.2665
0.772723	0.76859	P31150;G5E9U5	P31150	Rab GDP dissociation inhibitor alpha	GDI1	216.31	668570000	91	25.717	26.5545	25.332	26.1037	26.7407	27.0649
1.07426	0.501691	P50395;P50395-2;Q5SX87;V9GYF8;Q5SX90;Q5SX91;Q5SX86;V9GYJ7	P50395;P50395-2;Q5SX87	Rab GDP dissociation inhibitor beta	GDI2	49.227	215790000	39	24.5838	24.4099	24.5141	24.8179	24.7645	25.4304
0.129743	0.183233	Q92820	Q92820	Gamma-glutamyl hydrolase	GGH	17.551	38831000	17	23.0938	21.8649	22.5632	22.2144	22.4213	23.4359
1.12663	-0.472183	Q04760-2;Q04760	Q04760-2;Q04760	Lactoylglutathione lyase	GLO1	9.5062	61317000	25	23.4758	23.3382	22.8526	22.8066	22.6383	22.8052
0.167533	-0.302386	O76003	O76003	Glutaredoxin-3	GLRX3	9.1728	3008700	2	21.9968	21.984	22.6739	21.7636	20.8884	23.0954
0.778649	0.795867	P00367-2;P00367-3;P49448;P00367	P00367-2;P00367-3;P49448;P00367	Glutamate dehydrogenase 1, mitochondrial;Glutamate dehydrogenase 2, mitochondrial	GLUD1;GLUD2	2.2318	0	1	22.1847	22.2524	21.37	23.4235	22.1291	22.6421
0.719903	-0.7918	P17900	P17900	Ganglioside GM2 activator;Ganglioside GM2 activator isoform short	GM2A	5.3203	11606000	5	23.2815	22.3495	22.4697	22.3023	22.3326	21.0904
0.302609	0.335522	P63096-2;P04899-6;P04899-3;P04899-5;P04899-2;P63096;P04899;A0A3B3ITM0;P09471-2;P08754;P04899-4	P63096-2;P04899-6;P04899-3;P04899-5;P04899-2;P63096;P04899;A0A3B3ITM0;P09471-2;P08754;P04899-4	Guanine nucleotide-binding protein G(i) subunit alpha-1;Guanine nucleotide-binding protein G(i) subunit alpha-2;Guanine nucleotide-binding protein G(k) subunit alpha	GNAI1;GNAI2;GNAI3	5.6568	10910000	4	22.3215	21.5742	22.4263	22.9072	21.7286	22.6927
0.232237	-0.625607	P62873-2;P62873;B1AKQ8;F6X3N5;F6UT28;C9JZN1;C9JIS1;C9JXA5;E7EP32;Q9HAV0;P62879;C9JD14;F5H8J8;F5H100;B3KVK2;F5H0S8;E9PCP0;P16520-2;P16520	P62873-2;P62873;B1AKQ8;F6X3N5;F6UT28;C9JZN1;C9JIS1;C9JXA5;E7EP32;Q9HAV0;P62879	Guanine nucleotide-binding protein G(I)/G(S)/G(T) subunit beta-1;Guanine nucleotide-binding protein subunit beta-4;Guanine nucleotide-binding protein G(I)/G(S)/G(T) subunit beta-2	GNB1;GNB2;GNB4	18.551	108710000	18	22.4687	24.768	23.7832	21.8437	24.6164	22.6829
0.136153	-0.209524	Q9UBI6	Q9UBI6	Guanine nucleotide-binding protein G(I)/G(S)/G(O) subunit gamma-12	GNG12	2.4668	2038800	2	20.9593	22.5424	22.721	21.7507	21.7892	22.0543
0.0339198	-0.10089	G3V2C9;P59768	G3V2C9;P59768	Guanine nucleotide-binding protein subunit gamma;Guanine nucleotide-binding protein G(I)/G(S)/G(O) subunit gamma-2	GNG2	4.3771	0	2	23.4362	22.2951	22.0874	22.1784	24.2253	21.1123
0.0288969	-0.071806	D6RB13;D6RAY7;D6R9P4;D6RFF8;P46926	D6RB13;D6RAY7;D6R9P4;D6RFF8;P46926	Glucosamine-6-phosphate isomerase;Glucosamine-6-phosphate isomerase 1	GNPDA1	6.5166	6514600	2	22.4094	21.2816	23.1707	21.0576	23.224	22.3647
0.176483	-0.219543	Q14789-4;Q14789-3;Q14789;Q14789-2	Q14789-4;Q14789-3;Q14789;Q14789-2	Golgin subfamily B member 1	GOLGB1	1.8825	842390000	2	22.1961	22.0972	22.7083	21.7308	22.9774	21.6349
0.481306	-1.09921	Q8NBJ4-2;Q8NBJ4;F8WAT9;C9JYM4;C9J941	Q8NBJ4-2;Q8NBJ4;F8WAT9;C9JYM4	Golgi membrane protein 1	GOLM1	140.01	120270000	17	24.4907	24.9117	23.955	22.3184	22.4845	25.2569
0.0558681	0.101387	P17174-2;P17174	P17174-2;P17174	Aspartate aminotransferase, cytoplasmic	GOT1	8.0431	40924000	11	22.8361	23.2443	23.4635	22.3797	23.0525	24.4158
1.12111	1.52534	H7C410;P35052;H7BZL4;H7C024;P35052-2	H7C410;P35052;H7BZL4;H7C024	Glypican-1;Secreted glypican-1	GPC1	12.568	52547000	10	22.365	21.5312	21.8626	23.3366	24.5204	22.4777
0.0545347	0.114054	Q8N158;A0A0J9YXG7	Q8N158;A0A0J9YXG7	Glypican-2;Secreted glypican-2	GPC2	3.6022	2632000	6	20.9387	22.2683	23.3152	22.5955	21.8686	22.4004
0.0544439	-0.0824909	H0Y3U6;P51654-2;P51654;P51654-3	H0Y3U6;P51654-2;P51654;P51654-3	Glypican-3;Secreted glypican-3	GPC3	2.7383	13413000	10	23.0563	21.5406	21.5618	22.2612	21.8237	21.8263
1.5246	-0.553059	A0A0A0MTS2;A0A2U3TZU2;P06744;P06744-2;A0A0J9YXP8;A0A0J9YX90;A0A0J9YYH3;A0A2R8Y6C7;K7EQ48;CON__Q3ZBD7	A0A0A0MTS2;A0A2U3TZU2;P06744;P06744-2;A0A0J9YXP8;A0A0J9YX90;A0A0J9YYH3;A0A2R8Y6C7;K7EQ48	Glucose-6-phosphate isomerase	GPI	27.399	81785000	23	23.5391	23.9924	23.5511	22.9983	23.1662	23.2588
1.00219	1.0036	P51674-3;P51674-2;P51674	P51674-3;P51674-2;P51674	Neuronal membrane glycoprotein M6-a	GPM6A	4.9556	4638100	3	21.6526	20.963	22.2646	23.0515	22.7437	22.0957
0.383182	-0.433823	P09210;P08263	P09210;P08263	Glutathione S-transferase A2;Glutathione S-transferase A1;Glutathione S-transferase A1, N-terminally processed	GSTA2;GSTA1	2.1795	0	2	23.2493	21.8711	22.5864	22.5583	22.1899	21.6572
0.18981	-0.312709	E9PLF1;E9PHN7;E9PHN6;F6XZQ7;P28161-2;P28161	E9PLF1;E9PHN7;E9PHN6;F6XZQ7;P28161-2;P28161	Glutathione S-transferase Mu 2	GSTM2	2.6814	12404000	7	21.8955	22.7762	22.4325	22.2611	22.9342	20.9707
0.235479	0.888643	P09211;A8MX94;A0A087X2E9;A0A087X243	P09211;A8MX94	Glutathione S-transferase P	GSTP1	289.77	495140000	35	21.9292	26.6684	25.8807	25.2695	26.0114	25.8634
0.0842108	-0.232316	Q92522	Q92522	Histone H1x	H1FX	2.3174	3274000	1	22.8985	21.8279	22.9637	24.1291	21.252	21.6121
0.129249	-0.238317	Q71UI9;P0C0S5;C9J0D1;Q71UI9-3;Q71UI9-4;Q71UI9-2;C9J386	Q71UI9;P0C0S5;C9J0D1;Q71UI9-3;Q71UI9-4;Q71UI9-2	Histone H2A.V;Histone H2A.Z;Histone H2A	H2AFV;H2AFZ	2.6685	14131000	3	21.6965	22.3413	22.8997	21.9715	21.1232	23.1278
1.05347	1.12845	K7EK07;Q71DI3;P84243;P68431;K7EMV3;B4DEB1;K7ES00;Q16695;Q5TEC6;Q6NXT2;K7EP01	K7EK07;Q71DI3;P84243;P68431;K7EMV3;B4DEB1;K7ES00;Q16695;Q5TEC6;Q6NXT2;K7EP01	Histone H3;Histone H3.2;Histone H3.3;Histone H3.1;Histone H3.1t;Histone H3.3C	H3F3B;HIST2H3A;H3F3A;HIST1H3A;HIST3H3;HIST2H3PS2;H3F3C	15.708	1089300000	30	26.3804	26.7036	26.6323	27.1443	27.2722	28.6851
0.340323	0.759813	P51858-2;P51858;P51858-3	P51858-2;P51858;P51858-3	Hepatoma-derived growth factor	HDGF	30.406	162290000	26	22.2048	24.8352	24.3271	24.0581	24.1388	25.4496
0.0438307	0.0992419	K7ER15;Q9H0R4-2;Q9H0R4	K7ER15;Q9H0R4-2;Q9H0R4	Haloacid dehalogenase-like hydrolase domain-containing protein 2	HDHD2	1.8183	0	1	21.3588	21.7918	22.9468	21.1919	23.276	21.9272
0.094647	0.155752	Q5T3Q7;Q9H583	Q5T3Q7;Q9H583	HEAT repeat-containing protein 1;HEAT repeat-containing protein 1, N-terminally processed	HEATR1	3.5427	8267400000	6	22.5295	23.1923	21.4087	22.0229	22.6154	22.9593
0.151275	0.224483	P07686;H0Y9B6;Q5URX0	P07686;H0Y9B6;Q5URX0	Beta-hexosaminidase subunit beta;Beta-hexosaminidase subunit beta chain B;Beta-hexosaminidase subunit beta chain A	HEXB	2.7801	14227000	6	22.9209	21.0222	22.1119	22.2113	22.1543	22.3629
0.103791	-0.131706	P16401	P16401	Histone H1.5	HIST1H1B	4.638	80481000	8	21.7738	22.5846	21.9726	21.2348	22.5308	22.1703
0.877352	-2.57715	P16403;P10412;P16402;P22492;Q02539	P16403;P10412;P16402;P22492;Q02539	Histone H1.2;Histone H1.4;Histone H1.3;Histone H1t;Histone H1.1	HIST1H1C;HIST1H1E;HIST1H1D;HIST1H1T;HIST1H1A	14.843	573810000	13	25.7579	26.8301	26.3781	23.1872	26.2797	21.7678
0.357844	-0.609868	Q96QV6;P16104;Q8IUE6	Q96QV6;P16104;Q8IUE6	Histone H2A type 1-A;Histone H2AX;Histone H2A type 2-B	HIST1H2AA;H2AFX;HIST2H2AB	7.062	0	3	21.7532	22.8295	22.7177	21.2685	21.1366	23.0656
0.552911	0.804314	Q93077;Q7L7L0;P04908;A0A0U1RR32;A0A0U1RRH7;Q99878;Q96KK5;Q9BTM1;Q16777;Q6FI13;P20671;P0C0S8;A0A3B3IS11;Q9BTM1-2;H0YFX9;Q71UI9-5	Q93077;Q7L7L0;P04908;A0A0U1RR32;A0A0U1RRH7;Q99878;Q96KK5;Q9BTM1;Q16777;Q6FI13;P20671;P0C0S8;A0A3B3IS11;Q9BTM1-2	Histone H2A type 1-C;Histone H2A type 3;Histone H2A type 1-B/E;Histone H2A type 1-J;Histone H2A type 1-H;Histone H2A.J;Histone H2A type 2-C;Histone H2A type 2-A;Histone H2A type 1-D;Histone H2A type 1	HIST1H2AC;HIST3H2A;HIST1H2AB;HIST1H2AJ;HIST1H2AH;H2AFJ;HIST2H2AC;HIST2H2AA3;HIST1H2AD;HIST1H2AG	122.31	2693500000	44	27.6948	28.5612	27.897	27.8443	28.8382	29.8834
1.13195	0.855384	U3KQK0;Q99879;Q99877;Q93079;Q5QNW6;P62807;P58876;P57053;O60814;Q5QNW6-2;Q99880;Q16778;P33778;P23527;P06899;Q8N257;A0A2R8Y619;Q96A08	U3KQK0;Q99879;Q99877;Q93079;Q5QNW6;P62807;P58876;P57053;O60814;Q5QNW6-2;Q99880;Q16778;P33778;P23527;P06899	Histone H2B;Histone H2B type 1-M;Histone H2B type 1-N;Histone H2B type 1-H;Histone H2B type 2-F;Histone H2B type 1-C/E/F/G/I;Histone H2B type 1-D;Histone H2B type F-S;Histone H2B type 1-K;Histone H2B type 1-L;Histone H2B type 2-E;Histone H2B type 1-B;Histone H2B type 1-O;Histone H2B type 1-J	HIST1H2BN;HIST1H2BM;HIST1H2BH;HIST2H2BF;HIST1H2BC;HIST1H2BD;H2BFS;HIST1H2BK;HIST1H2BL;HIST2H2BE;HIST1H2BB;HIST1H2BO;HIST1H2BJ	19.121	2080800000	23	27.3853	28.2091	27.5742	28.3406	28.3095	29.0848
0.204704	0.37099	P62805	P62805	Histone H4	HIST1H4A	25.265	1180800000	45	26.5011	27.7422	26.8335	26.8806	26.7286	28.5805
0.561094	-0.68191	P17096-2;P17096	P17096-2;P17096	High mobility group protein HMG-I/HMG-Y	HMGA1	6.1887	3279400	3	22.3855	23.4689	23.0311	23.1399	21.9939	21.7059
0.0216368	0.0420252	F5H2U8;F5H2A4;F5H6H0;P52926-3;P52926-6;P52926-4;P52926-5;P52926-2;P52926	F5H2U8;F5H2A4;F5H6H0;P52926-3;P52926-6;P52926-4;P52926-5;P52926-2;P52926	High mobility group protein HMGI-C	HMGA2	33.376	13634000	11	22.1857	21.9679	22.7439	22.3991	21.2649	23.3596
0.0664017	0.388506	Q5T7C4;P09429;B2RPK0	Q5T7C4;P09429	High mobility group protein B1	HMGB1	38.386	405860000	32	21.3016	26.4163	25.3486	22.277	25.179	26.7761
0.00173277	-0.00460498	P26583;D6R9A6	P26583;D6R9A6	High mobility group protein B2	HMGB2	17.952	67447000	16	21.9527	23.8597	23.3716	22.5672	22.2548	24.3483
0.206027	0.753566	P05204	P05204	Non-histone chromosomal protein HMG-17	HMGN2	25.112	32063000	12	24.0208	20.4845	21.4083	22.1686	21.4535	24.5522
0.918938	-0.967491	A0A087WZE9;Q15651-2;Q15651	A0A087WZE9;Q15651-2;Q15651	High mobility group nucleosome-binding domain-containing protein 3	HMGN3	2.1415	12621000	5	21.8186	23.1521	22.8755	22.009	21.1035	21.8313
0.798702	-0.512235	F8W6I7;P09651-3;P09651-2;P09651;F8VZ49;Q32P51;F8VTQ5;F8VYN5;F8W646;H0YH80;A0A2R8Y4L2	F8W6I7;P09651-3;P09651-2;P09651;F8VZ49;Q32P51;F8VTQ5;F8VYN5;F8W646;H0YH80;A0A2R8Y4L2	Heterogeneous nuclear ribonucleoprotein A1;Heterogeneous nuclear ribonucleoprotein A1, N-terminally processed;Heterogeneous nuclear ribonucleoprotein A1-like 2	HNRNPA1;HNRNPA1L2	75.694	251350000	65	25.1327	25.391	24.9786	24.1454	25.0685	24.7517
0.0640019	0.0780258	P22626-2;P22626;A0A087WUI2	P22626-2;P22626;A0A087WUI2	Heterogeneous nuclear ribonucleoproteins A2/B1	HNRNPA2B1	37.228	271470000	37	24.7826	25.2704	24.6014	24.285	25.576	25.0276
1.03572	-1.01891	P51991;P51991-2;H7C1J8	P51991;P51991-2	Heterogeneous nuclear ribonucleoprotein A3	HNRNPA3	5.8361	5475500	4	23.5226	23.5333	22.2522	21.8825	22.4442	21.9247
0.0391731	-0.089173	D6R9P3;D6RD18;D6RBZ0;Q99729-3;Q99729-2;Q99729-4;Q99729	D6R9P3;D6RD18;D6RBZ0;Q99729-3;Q99729-2;Q99729-4;Q99729	Heterogeneous nuclear ribonucleoprotein A/B	HNRNPAB	6.1151	103130000	21	22.6197	24.0978	23.8952	22.2155	24.173	23.9567
0.143983	0.353916	G3V576;G3V4W0;B4DY08;B2R5W2;G3V4C1;G3V2Q1;P07910-4;P07910-2;P07910;G3V5X6;G3V3K6;G3V251;B4DSU6;G3V555;G3V575;G3V4M8	G3V576;G3V4W0;B4DY08;B2R5W2;G3V4C1;G3V2Q1;P07910-4;P07910-2;P07910;G3V5X6;G3V3K6;G3V251;B4DSU6;G3V555;G3V575;G3V4M8	Heterogeneous nuclear ribonucleoproteins C1/C2	HNRNPC	39.749	121180000	21	21.8745	24.6531	24.0588	23.4097	24.5532	23.6852
0.137931	0.225809	H0Y8G5;Q14103-3;Q14103;H0YA96;D6RAF8;Q14103-4;Q14103-2;D6RF44;D6RD83;D6RBQ9	H0Y8G5;Q14103-3;Q14103;H0YA96;D6RAF8;Q14103-4;Q14103-2;D6RF44;D6RD83;D6RBQ9	Heterogeneous nuclear ribonucleoprotein D0	HNRNPD	112.03	236600000	29	23.9792	26.0031	24.7677	24.9427	25.4077	25.0772
0.793697	-1.02819	A0A087WUK2;O14979-3;O14979-2;O14979	A0A087WUK2;O14979-3;O14979-2;O14979	Heterogeneous nuclear ribonucleoprotein D-like	HNRNPDL	2.4289	14805000	3	23.9035	22.858	21.8478	21.9878	21.7353	21.8017
1.08053	-1.72465	E7EQJ0;D6RAM1;E5RGV0;D6R9T0;D6RFM3;D6RIT2;D6RIU0;D6RDU3;D6RJ04;D6RIH9;D6RBM0;E9PCY7;G8JLB6;P31943;E5RJ94;D6R9D3;D6RF17;D6RDL0;E5RGH4;H0YAQ2;E7EN40;P55795	E7EQJ0;D6RAM1;E5RGV0;D6R9T0;D6RFM3;D6RIT2;D6RIU0;D6RDU3;D6RJ04;D6RIH9;D6RBM0;E9PCY7;G8JLB6;P31943;E5RJ94;D6R9D3;D6RF17;D6RDL0;E5RGH4;H0YAQ2;E7EN40;P55795	Heterogeneous nuclear ribonucleoprotein H;Heterogeneous nuclear ribonucleoprotein H, N-terminally processed;Heterogeneous nuclear ribonucleoprotein H2	HNRNPH1;HNRNPH2	61.619	3208700	7	22.7822	23.0732	23.6822	22.1741	20.0509	22.1386
0.11772	-0.180728	P61978-3;P61978;P61978-2;Q5T6W2;S4R457;S4R359	P61978-3;P61978;P61978-2;Q5T6W2	Heterogeneous nuclear ribonucleoprotein K	HNRNPK	102.78	1041000000	34	28.0963	26.2032	27.1613	26.8217	26.895	27.2019
0.349564	-0.638936	P14866	P14866	Heterogeneous nuclear ribonucleoprotein L	HNRNPL	6.2852	4742100	5	23.1341	22.0412	21.5512	22.1278	20.4114	22.2705
0.459743	-0.571218	A0A1X7SBS1;A0A1W2PPS1;Q00839-2;Q00839;A0A1W2PP35;A0A1W2PQ74;A0A1W2PQL0;A0A1W2PP34;A0A1W2PPL4;A0A1W2PPH7;Q5RI18;A0A1W2PRZ7;A0A1W2PPE9;A0A1W2PNG3;A0A1W2PRI6;A0A1W2PP22;A0A1W2PQD4	A0A1X7SBS1;A0A1W2PPS1;Q00839-2;Q00839;A0A1W2PP35;A0A1W2PQ74;A0A1W2PQL0;A0A1W2PP34;A0A1W2PPL4;A0A1W2PPH7;Q5RI18	Heterogeneous nuclear ribonucleoprotein U	HNRNPU	27.717	68600000	23	22.6491	24.3977	23.5976	22.6718	22.9647	23.2943
2.50213	-1.56044	A0A087WU08;A0A0C4DGL8;J3QLC9;J3QR68;H0Y300;P00738-2;P00738;H3BS21;A0A0A0MRD9;P00739;P00739-2	A0A087WU08;A0A0C4DGL8;J3QLC9;J3QR68;H0Y300;P00738-2;P00738;H3BS21;A0A0A0MRD9;P00739;P00739-2	Haptoglobin;Haptoglobin alpha chain;Haptoglobin beta chain;Haptoglobin-related protein	HP;HPR	6.306	0	4	23.211	22.9885	22.5987	21.6636	21.3726	21.0806
1.15499	0.458552	P02790;Q9BS19	P02790;Q9BS19	Hemopexin	HPX	323.31	26379000000	408	31.2585	31.6559	31.4578	32.1938	31.6922	31.8619
0.355037	-0.33183	O75506	O75506	Heat shock factor-binding protein 1	HSBP1	10.874	6663700	6	21.3369	22.0877	21.508	21.6743	20.6837	21.5792
0.364848	0.43261	P07900;P07900-2;Q14568;G3V2J8;Q58FF6;Q58FG0;Q58FG1	P07900;P07900-2	Heat shock protein HSP 90-alpha	HSP90AA1	306.98	1917900000	150	27.435	27.9327	27.4619	27.1289	28.322	28.6765
0.077552	0.0826359	P08238;Q58FF7	P08238	Heat shock protein HSP 90-beta	HSP90AB1	96.415	335500000	69	24.9855	25.4489	25.2228	24.7099	25.9231	25.2722
0.500641	0.360924	Q58FF8	Q58FF8	Putative heat shock protein HSP 90-beta 2	HSP90AB2P	3.5264	38790000	8	21.9239	22.6373	22.2522	22.3964	23.1083	22.3914
0.786019	-1.00365	P14625;Q96GW1;A0A1W2PRR1;F8W026;H0YIV0	P14625;Q96GW1;A0A1W2PRR1	Endoplasmin	HSP90B1	71.194	90651000	40	24.3554	23.6971	23.3741	21.8144	23.0662	23.535
0.418924	0.856589	A0A0G2JIW1;P0DMV8-2;P0DMV9;P0DMV8;V9GZ37	A0A0G2JIW1;P0DMV8-2;P0DMV9;P0DMV8;V9GZ37	Heat shock 70 kDa protein 1A;Heat shock 70 kDa protein 1B	HSPA1A;HSPA1B	48.892	32116000	7	21.7956	23.3836	21.2619	22.2356	22.6027	24.1726
0.12898	0.18085	P34932;A0A087WTS8;A0A087WYC1;P34932-2	P34932;A0A087WTS8;A0A087WYC1	Heat shock 70 kDa protein 4	HSPA4	3.4115	27586000	5	21.0645	22.371	22.3805	21.5911	22.273	22.4945
0.415425	-0.391991	P11021	P11021	78 kDa glucose-regulated protein	HSPA5	36.178	121480000	37	23.4468	24.2474	24.1728	23.2392	23.2687	24.1832
0.928621	-0.300229	E9PKE3;P11142;P11142-2;E9PNE6;E9PN89;E9PLF4;E9PQQ4;E9PQK7;E9PK54;E9PN25;E9PPY6;A8K7Q2;P54652;E9PI65;E9PS65;E9PM13;P17066	E9PKE3;P11142;P11142-2;E9PNE6;E9PN89;E9PLF4	Heat shock cognate 71 kDa protein	HSPA8	188.2	610000000	79	26.272	26.3215	26.551	25.8529	26.2804	26.1104
0.729432	0.834037	P04792;C9J3N8;F8WE04	P04792;C9J3N8;F8WE04	Heat shock protein beta-1	HSPB1	5.1	50149000	13	21.622	22.5362	22.4333	22.1579	23.467	23.4686
0.531382	-0.31536	P10809;E7ESH4;E7EXB4;C9JL25;P10809-2;C9J0S9;C9JL19;C9JCQ4	P10809	60 kDa heat shock protein, mitochondrial	HSPD1	175.85	231650000	68	25.5977	24.9627	24.8608	24.5901	25.0074	24.8777
0.0547295	0.151674	P61604;B8ZZ54;B8ZZL8;S4R3N1	P61604;B8ZZ54;B8ZZL8	10 kDa heat shock protein, mitochondrial	HSPE1	51.131	61330000	19	22.9991	19.9884	22.121	22.0624	21.1931	22.3079
0.728364	-0.449708	P98160;A0A3B3IT11	P98160	Basement membrane-specific heparan sulfate proteoglycan core protein;Endorepellin;LG3 peptide	HSPG2	19.41	175240000	29	24.6606	24.3422	24.9228	23.8534	24.6246	24.0984
0.097785	-0.11667	H0Y7G9;A0A3B3IU24;Q92743	H0Y7G9;A0A3B3IU24;Q92743	Serine protease HTRA1	HTRA1	1.8522	0	1	22.7042	21.2763	21.995	22.0849	21.8429	21.6977
0.0538393	0.0777149	A0A087X054;Q9Y4L1	A0A087X054;Q9Y4L1	Hypoxia up-regulated protein 1	HYOU1	2.137	8152000	2	22.7443	22.2567	21.4838	22.4777	22.6637	21.5764
0.286321	0.166416	O75874;C9JJE5;C9JLU6;C9J4N6	O75874	Isocitrate dehydrogenase [NADP] cytoplasmic	IDH1	152.33	313810000	58	25.0424	25.4629	25.2232	25.3159	25.1182	25.7936
1.7041	-0.548422	H0YL11;P48735-2;P48735	H0YL11;P48735-2;P48735	Isocitrate dehydrogenase [NADP], mitochondrial	IDH2	6.4068	21215000	5	22.6957	22.518	22.525	22.0173	22.2695	21.8067
0.234385	-0.146021	P01344;P01344-2;P01344-3	P01344;P01344-2;P01344-3	Insulin-like growth factor II;Insulin-like growth factor II;Insulin-like growth factor II Ala-25 Del;Preptin	IGF2	31.901	112540000	18	24.234	23.6799	24.3738	24.0261	23.71	24.1136
0.153238	-0.0751425	P18065;C9JMY1;C9JW52;H7C1H0	P18065;C9JMY1	Insulin-like growth factor-binding protein 2	IGFBP2	83.965	1388600000	95	27.092	27.4024	27.6095	27.3849	27.4096	27.0841
0.188005	-0.0898101	H0Y485;H0Y5K2;B3KWK7;A6XND1;A6XND0;P17936;P17936-2;C9JMX4	H0Y485;H0Y5K2;B3KWK7;A6XND1;A6XND0;P17936;P17936-2;C9JMX4	Insulin-like growth factor-binding protein 3	IGFBP3	78.349	454740000	17	25.8914	25.6536	26.0246	25.5611	25.6879	26.0512
0.84518	-0.709691	P22692-2;P22692	P22692-2;P22692	Insulin-like growth factor-binding protein 4	IGFBP4	2.0243	12661000	3	23.4737	22.4472	22.3045	21.9773	21.8429	22.2761
0.142537	-0.631337	P24593;C9JXX4	P24593;C9JXX4	Insulin-like growth factor-binding protein 5	IGFBP5	184.23	333150000	60	24.9724	25.0945	25.2241	21.1848	26.0597	26.1524
1.64452	2.45727	Q16270-2;Q16270	Q16270-2;Q16270	Insulin-like growth factor-binding protein 7	IGFBP7	22.787	89849000	21	23.3261	23.0431	21.7357	26.1071	24.7042	24.6655
0.367587	-0.687844	Q8WX77	Q8WX77	Insulin-like growth factor-binding protein-like 1	IGFBPL1	98.146	825000000	45	26.4988	26.9483	25.8644	25.2912	27.1541	24.8026
0.390054	0.987786	A0A286YEY1;P01876;A0A0G2JMB2;A0A286YEY5;P01877	A0A286YEY1;P01876;A0A0G2JMB2	Ig alpha-1 chain C region	IGHA1	15.905	155880000	23	23.9547	21.3426	24.1506	24.3577	23.0639	24.9896
0.192295	-0.249104	A0A0A0MS08;P01857;A0A0A0MS07	A0A0A0MS08;P01857;A0A0A0MS07	Ig gamma-1 chain C region	IGHG1	133.44	274140000	25	25.0558	25.4481	25.3156	24.176	25.0476	25.8486
1.14256	0.611801	P01834	P01834	Ig kappa chain C region	IGKC	124.64	330570000	42	24.544	25.3514	24.9243	25.7405	25.4381	25.4766
0.917311	0.611612	P0DOY3;P0DOY2;A0A0B4J231;P0CG04;P0CF74;B9A064	P0DOY3;P0DOY2;A0A0B4J231;P0CG04;P0CF74;B9A064	Ig lambda-1 chain C regions;Ig lambda-6 chain C region;Immunoglobulin lambda-like polypeptide 5	IGLL5;IGLC1;IGLC6	16.301	32898000	18	21.7802	22.0306	21.9474	22.7923	21.9277	22.873
0.178458	0.225864	B4DY09;Q12905;X6R6Z1;A0A0A0MRL0	B4DY09;Q12905;X6R6Z1	Interleukin enhancer-binding factor 2	ILF2	48.969	39340000	16	22.3041	22.1856	22.2814	22.6433	23.2215	21.5838
0.819002	0.964222	Q12906-5;Q12906-4;Q12906-2;Q12906-6;Q12906-3;Q12906;Q12906-7;K7EKJ9;K7ERM6;K7ENK6;K7EM82;K7EJ09;K7ER69;Q96SI9-2;Q96SI9;K7EQ75;K7EQR9	Q12906-5;Q12906-4;Q12906-2;Q12906-6;Q12906-3;Q12906;Q12906-7;K7EKJ9	Interleukin enhancer-binding factor 3	ILF3	10.918	64059000	18	22.5945	22.4468	22.6266	23.0668	22.8934	24.6004
0.0188752	-0.207698	A6XGL2;P01308;C9JNR5;F8WCM5	A6XGL2;P01308;C9JNR5;F8WCM5	Insulin;Insulin B chain;Insulin A chain;Insulin, isoform 2	INS;INS-IGF2	4.6562	5521500000	13	22.3105	30.757	29.2131	30.5632	28.9493	22.145
0.00652683	0.0112712	O00410;H0Y8C6;O00410-2;O00410-3;C9JZD8;E7EQT5;E7ETV3	O00410;H0Y8C6;O00410-2;O00410-3	Importin-5	IPO5	23.437	19535000	14	21.909	21.7804	20.755	20.628	21.8741	21.9761
0.127877	0.12431	A0A0J9YXZ5;P46940	A0A0J9YXZ5;P46940	Ras GTPase-activating-like protein IQGAP1	IQGAP1	1.9938	4082900	0	22.1961	21.8942	21.7751	22.2976	21.4239	22.5168
0.371586	-0.245015	O14498;H0YN67;H0YL90	O14498;H0YN67;H0YL90	Immunoglobulin superfamily containing leucine-rich repeat protein	ISLR	23.994	28332000	9	23.4	22.744	23.0662	22.4234	23.0377	23.0141
0.95288	0.337135	B7ZKJ8;Q14624-3;Q14624-2;Q14624;H7C0L5;Q14624-4	B7ZKJ8;Q14624-3;Q14624-2;Q14624;H7C0L5;Q14624-4	Inter-alpha-trypsin inhibitor heavy chain H4;70 kDa inter-alpha-trypsin inhibitor heavy chain H4;35 kDa inter-alpha-trypsin inhibitor heavy chain H4	ITIH4	131.5	1436900000	72	27.2807	27.6938	27.2406	27.8	27.8429	27.5835
0.0750615	-0.159929	Q08881	Q08881	Tyrosine-protein kinase ITK/TSK	ITK	1.9748	232120000	2	21.9642	22.7721	23.441	22.6866	23.5654	21.4456
0.418084	-0.489367	A0A3B3IUC0;Q9Y287	A0A3B3IUC0;Q9Y287	Integral membrane protein 2B;BRI2, membrane form;BRI2 intracellular domain;BRI2C, soluble form;Bri23 peptide	ITM2B	2.0971	0	1	21.8658	23.1942	21.8099	21.5087	22.2068	21.6863
0.390478	0.639113	Q07666-3;Q07666-2;Q07666	Q07666-3;Q07666-2;Q07666	KH domain-containing, RNA-binding, signal transduction-associated protein 1	KHDRBS1	30.043	24223000	8	23.182	21.2396	21.7559	22.1026	23.385	22.6073
0.0494205	0.0880477	H7C4F6;O00629	H7C4F6;O00629	Importin subunit alpha-3	KPNA4	3.3331	7193700	5	22.2069	22.1027	21.8488	21.5303	21.5475	23.3448
0.0293167	0.0296377	Q14974;J3QR48;Q14974-2	Q14974;J3QR48	Importin subunit beta-1	KPNB1	15.546	72322000	18	23.2843	23.2262	23.1476	23.9181	22.994	22.8349
1.42495	-1.13093	F8VZY9;P05783;CON__H-INV:HIT000015463	F8VZY9;P05783	Keratin, type I cytoskeletal 18	KRT18	13.755	74548000	19	23.5413	22.8679	23.7243	21.7231	22.4987	22.519
2.10317	1.40369	P25391	P25391	Laminin subunit alpha-1	LAMA1	2.4504	13502000	5	21.355	21.5343	21.5635	22.5617	22.6627	23.4395
0.619557	1.0147	G3XAI2;P07942;E7EPA6	G3XAI2;P07942	Laminin subunit beta-1	LAMB1	90.029	48287000	27	21.0511	22.3254	22.5146	22.8952	22.0267	24.0133
0.776038	0.773829	P11047;Q9Y6N6	P11047	Laminin subunit gamma-1	LAMC1	3.7037	13552000	5	22.0747	22.2011	21.6179	23.5809	22.233	22.4013
0.375145	0.49124	F6S2S5;Q14847;Q14847-2;K7ESD6;C9J9W2;O76041-2	F6S2S5;Q14847;Q14847-2;K7ESD6;C9J9W2;O76041-2	LIM and SH3 domain protein 1	LASP1	9.055	27672000	18	21.6489	21.486	21.7442	22.2734	21.1074	22.9721
0.618491	-0.409782	P00338;P00338-3;P00338-4;P00338-5;P00338-2;F5GXY2;F5H5J4;F5H6W8;F5GXH2;F5GYU2;F5GZQ4;F5H8H6;F5GXC7;F5GWW2;F5GXU1	P00338;P00338-3;P00338-4;P00338-5;P00338-2;F5GXY2	L-lactate dehydrogenase A chain	LDHA	66.116	327230000	65	25.7092	25.7397	25.4802	24.9146	24.9807	25.8044
0.638365	0.919324	P07195;A0A3B3IS95;A8MW50;C9J7H8;F5H793;F5H5G7;F5H155;A0A087WUM2;G3XAP5;F5H245;Q6ZMR3;P07864	P07195;A0A3B3IS95;A8MW50	L-lactate dehydrogenase B chain;L-lactate dehydrogenase	LDHB	323.31	1872600000	100	26.8348	27.8939	27.5033	27.6373	27.8894	29.4634
0.126081	-0.301615	P09382;F8WEI7	P09382	Galectin-1	LGALS1	6.0248	105080000	17	21.8726	23.9636	24.7776	23.2007	23.0152	23.493
4.46781	-2.95329	Q08380;K7ESM3;K7EKQ5;K7EP36;K7EJY8;K7EQT9;K7ES75;K7EN99;K7ERZ6;K7EJD3	Q08380	Galectin-3-binding protein	LGALS3BP	81.349	675250000	56	27.3043	27.123	26.8196	24.1815	24.1308	24.0748
0.129481	-0.202461	P49257	P49257	Protein ERGIC-53	LMAN1	1.9463	7842000	1	22.3951	22.12	22.5271	22.2002	21.1458	23.0887
0.251701	-0.43052	D6RBV2;Q12907;D6RDX1;D6RIU4;D6RBH1	D6RBV2;Q12907;D6RDX1;D6RIU4	Vesicular integral-membrane protein VIP36	LMAN2	16.583	58480000	10	24.3689	22.1079	23.4066	22.5351	22.9192	23.1377
0.214717	0.487435	P02545-2;P02545-6;P02545-3;P02545;Q3BDU5;Q5TCI8;P02545-5;P02545-4;H0YAB0;A0A0C4DGC5	P02545-2;P02545-6;P02545-3;P02545;Q3BDU5;Q5TCI8;P02545-5;P02545-4	Prelamin-A/C;Lamin-A/C	LMNA	11.249	48294000	17	22.0956	22.8639	22.8187	22.3968	22.0811	24.7626
0.607245	0.434884	P20700;E9PBF6;A0A0D9SFY5;A0A0D9SFE5	P20700;E9PBF6	Lamin-B1	LMNB1	26.035	135790000	28	23.3889	24.286	24.0412	24.0823	24.2587	24.6797
0.188775	-0.231521	Q03252	Q03252	Lamin-B2	LMNB2	8.592	16582000	7	23.2555	22.227	23.1168	23.1483	21.9898	22.7667
0.804137	1.45053	B8ZZF8;Q9Y4Y9	B8ZZF8;Q9Y4Y9	U6 snRNA-associated Sm-like protein LSm5	LSM5	2.1247	14532000	7	20.3764	20.7106	22.9291	22.5109	23.2506	22.6062
0.787434	0.452332	P09960-3;P09960-2;P09960-4;P09960	P09960-3;P09960-2;P09960-4;P09960	Leukotriene A-4 hydrolase	LTA4H	7.2774	29498000	7	22.5183	22.9287	22.6881	22.7273	23.2236	23.5412
0.634617	-0.310696	P51884;CON__Q05443	P51884	Lumican	LUM	323.31	10310000000	140	30.7825	30.2222	30.4816	30.0966	30.4771	29.9805
0.81682	-0.914684	P33908;P33908-2	P33908;P33908-2	Mannosyl-oligosaccharide 1,2-alpha-mannosidase IA	MAN1A1	113.88	257710000	42	25.8617	25.1159	25.1862	25.015	24.8479	23.5568
0.195927	0.738234	P46821;D6RA32;D6RA40	P46821;D6RA32	Microtubule-associated protein 1B;MAP1B heavy chain;MAP1 light chain LC1	MAP1B	141.24	175090000	61	22.3273	24.5462	23.5262	21.7285	24.7699	26.1161
0.419751	0.631261	F5H1X6;F5H4R1;J3KNB8;F5H538;Q9Y6R4-2;Q9Y6R4	F5H1X6;F5H4R1;J3KNB8;F5H538;Q9Y6R4-2;Q9Y6R4	Mitogen-activated protein kinase kinase kinase 4	MAP3K4	2.4837	66072000	6	21.2408	22.8397	20.9722	22.203	22.8228	21.9206
0.09778	0.154914	Q15691	Q15691	Microtubule-associated protein RP/EB family member 1	MAPRE1	3.1259	11403000	3	22.9477	21.6903	23.3983	22.4825	23.3097	22.7089
0.379515	0.644969	P29966	P29966	Myristoylated alanine-rich C-kinase substrate	MARCKS	246.8	264180000	46	24.3074	24.9498	24.3006	24.1143	24.9391	26.4394
0.669507	0.836562	P49006	P49006	MARCKS-related protein	MARCKSL1	16.152	11029000	1	21.2551	22.2287	21.5401	22.637	21.6107	23.2859
0.658243	0.834171	P48740-4;P48740-2;F8W876;P48740-3;P48740	P48740-4;P48740-2;F8W876;P48740-3;P48740	Mannan-binding lectin serine protease 1;Mannan-binding lectin serine protease 1 heavy chain;Mannan-binding lectin serine protease 1 light chain	MASP1	11.891	18099000	8	21.3705	22.7607	22.3112	23.1591	22.2141	23.5717
0.597525	1.18443	P40925;P40925-3;B9A041;P40925-2;B8ZZ51;C9JF79;C9JRL4;C9JLV6	P40925;P40925-3;B9A041;P40925-2;B8ZZ51;C9JF79	Malate dehydrogenase, cytoplasmic;Malate dehydrogenase	MDH1	25.818	197280000	32	22.4497	24.508	24.5777	24.0036	25.2134	25.8717
0.372969	0.505729	P40926-2;P40926;G3XAL0	P40926-2;P40926;G3XAL0	Malate dehydrogenase, mitochondrial;Malate dehydrogenase	MDH2	29.749	48333000	12	23.2179	22.4324	22.5636	22.2302	23.6062	23.8947
0.179754	-0.324308	E9PPJ5;E9PLM6;P21741-2;P21741	E9PPJ5;E9PLM6;P21741-2;P21741	Midkine	MDK	3.0402	7739200	5	22.5689	23.1051	21.2167	22.0303	22.6239	21.2636
0.30233	0.19534	K7ES70;P55083;P55083-2	K7ES70;P55083;P55083-2	Microfibril-associated glycoprotein 4	MFAP4	95.262	1232000000	38	27.4963	27.1367	26.9745	27.3503	27.7879	27.0555
0.00438601	0.0049572	P08493;P08493-2	P08493;P08493-2	Matrix Gla protein	MGP	22.253	181360000	10	23.0192	22.1053	23.0966	22.7067	22.4397	23.0895
0.0825004	0.159967	A0A0A0MTD5;Q8IYU8	A0A0A0MTD5;Q8IYU8	Calcium uptake protein 2, mitochondrial	MICU2	1.9093	318750000	7	22.3829	22.8816	20.7529	22.6303	21.8373	22.0297
0.0679269	0.0704454	P14174	P14174	Macrophage migration inhibitory factor	MIF	84.964	998740000	37	26.706	27.0675	27.1545	26.6168	26.816	27.7065
0.246069	-0.192605	P08253;P08253-3;P08253-2;H3BR66;H3BS34;H3BV48	P08253;P08253-3;P08253-2	72 kDa type IV collagenase;PEX	MMP2	65.037	443270000	45	26.0747	25.708	25.6972	26.1685	25.5307	25.2027
0.430318	0.678588	Q9UBG0	Q9UBG0	C-type mannose receptor 2	MRC2	4.0934	14557000	6	21.5399	21.9466	21.7962	22.9053	21.1298	23.2834
0.165384	0.403987	P26038;V9GZ54	P26038	Moesin	MSN	55.22	63021000	18	22.924	21.2634	23.2693	21.6023	23.1495	23.9169
0.223483	-0.282529	J3KTJ1;J3QRS3;P24844-2;P19105;P24844;O14950	J3KTJ1;J3QRS3;P24844-2;P19105;P24844;O14950	Myosin regulatory light polypeptide 9;Myosin regulatory light chain 12A;Myosin regulatory light chain 12B	MYL12A;MYL9;MYL12B	15.934	7199500	9	23.3124	22.5726	22.615	23.408	22.036	22.2084
0.954133	-1.84101	F8VPF3;F8W1R7;J3KND3;G8JLA2;G3V1V0;B7Z6Z4;P60660-2;P60660;F8VZU9;G3V1Y7;F8W1I5;F8W180;P14649	F8VPF3;F8W1R7;J3KND3;G8JLA2;G3V1V0;B7Z6Z4;P60660-2;P60660;F8VZU9;G3V1Y7;F8W1I5;F8W180;P14649	Myosin light polypeptide 6;Myosin light chain 6B	MYL6;MYL6B	39.627	103430000	12	23.9524	24.5549	23.5703	20.6704	22.249	23.6352
0.279884	0.684937	H3BML9;H3BN54;H3BPK4;Q96A32	H3BML9;H3BN54;H3BPK4;Q96A32	Myosin regulatory light chain 2, skeletal muscle isoform	MYLPF	3.726	829070	2	21.9198	19.696	22.3889	22.2341	21.0158	22.8095
0.0621773	0.0779552	F8VZJ2;H0YHX9;Q13765;E9PAV3-2;E9PAV3	F8VZJ2;H0YHX9;Q13765;E9PAV3-2;E9PAV3	Nascent polypeptide-associated complex subunit alpha;Nascent polypeptide-associated complex subunit alpha, muscle-specific form	NACA	7.2955	15339000	6	22.5712	21.6412	22.3812	21.7234	22.2383	22.8658
0.00753124	0.010163	H0YH88;H0YHC3;F8W020;F8W118;F8VXI6;F8VUX1;F8VY35;F8VV59;F8W543;B7Z9C2;F8W0J6;F5H4R6;H0YIV4;P55209-3;P55209-2;P55209	H0YH88;H0YHC3;F8W020;F8W118;F8VXI6;F8VUX1;F8VY35;F8VV59;F8W543;B7Z9C2;F8W0J6;F5H4R6;H0YIV4;P55209-3;P55209-2;P55209	Nucleosome assembly protein 1-like 1	NAP1L1	3.0398	44758000	8	22.2558	23.0195	23.294	23.3944	22.9049	22.3006
0.250163	0.223132	A8MXH2;C9JZI7;Q99733;Q99733-2;E9PNW0;E9PJJ2;E9PS34;E9PNJ7;E9PKT8;C9J6D1;H0YCI4	A8MXH2;C9JZI7;Q99733;Q99733-2;E9PNW0;E9PJJ2;E9PS34;E9PNJ7;E9PKT8;C9J6D1;H0YCI4	Nucleosome assembly protein 1-like 4	NAP1L4	31.733	5250800	7	22.594	23.1438	22.364	23.1115	22.3965	23.2632
0.972808	0.670661	P49321;P49321-3;E9PPR5;P49321-2;P49321-4;E9PPQ8;E9PI86;Q5T624;E9PNB5;H0YDS9;E9PRH9;H0YF33	P49321;P49321-3;E9PPR5;P49321-2;P49321-4	Nuclear autoantigenic sperm protein	NASP	4.6822	5620700	5	22.4631	21.8439	21.7892	22.5726	23.1681	22.3675
0.109895	0.190943	A0A087X1V2;A0A087WVU1;A0A0D9SF98;A0A087WWJ5;H7BYX6;A0A087WTE4;A0A087WTF6;A0A087WX77;A0A087WWD4;A0A087WV75;P13591-4;P13591-3;P13591-1;P13591;A0A0C4DGS4;P13591-5;A0A087WZS4	A0A087X1V2;A0A087WVU1;A0A0D9SF98;A0A087WWJ5;H7BYX6;A0A087WTE4;A0A087WTF6;A0A087WX77;A0A087WWD4;A0A087WV75;P13591-4;P13591-3;P13591-1;P13591;A0A0C4DGS4;P13591-5	Neural cell adhesion molecule 1	NCAM1	6.158	16875000	10	21.4406	20.919	22.8156	21.4752	22.4184	21.8544
0.300055	-0.674497	O14594	O14594	Neurocan core protein	NCAN	7.5012	78073000	13	22.0216	24.2002	21.1893	21.6021	22.1297	21.6558
0.174715	-0.301226	P19338;H7BY16;C9JYW2;C9JLB1;C9J1H7;C9JWL1	P19338;H7BY16	Nucleolin	NCL	267.41	408070000	67	24.856	26.3759	25.8441	24.481	26.1018	25.5895
1.15717	0.917072	F8W1A2;F8VVB6;Q99435-4;Q99435;Q99435-2;Q99435-3;F8VXR5;F8VRQ0;H0YIT4;F8VZ72	F8W1A2;F8VVB6;Q99435-4;Q99435;Q99435-2;Q99435-3	Protein kinase C-binding protein NELL2	NELL2	48.876	42659000	22	21.5319	22.6934	22.2876	22.8825	23.3846	22.9971
0.690548	-1.03735	Q92859-3;Q92859-2;Q92859-4;Q92859;Q59FP8	Q92859-3;Q92859-2;Q92859-4;Q92859	Neogenin	NEO1	9.4672	7147700	8	23.3739	23.0767	21.8799	21.267	21.1945	22.757
1.49824	-0.973536	P14543-2;P14543	P14543-2;P14543	Nidogen-1	NID1	10.624	13715000	4	22.6873	23.033	23.625	22.2633	21.8929	22.2686
0.376567	-1.10233	Q14112-2;Q14112;A0A087WZP6;H0YJV3	Q14112-2;Q14112;A0A087WZP6	Nidogen-2	NID2	97.155	211870000	40	24.913	24.5037	25.0678	25.034	24.8486	21.295
0.535477	0.337399	Q32Q12;P22392;P22392-2;O60361	Q32Q12;P22392;P22392-2;O60361	Nucleoside diphosphate kinase;Nucleoside diphosphate kinase B;Putative nucleoside diphosphate kinase	NME1-NME2;NME2;NME2P1	4.2488	165290000	15	24.3042	24.437	24.3366	24.1847	24.779	25.1264
1.67965	1.81227	P15531;P15531-2;E7ERL0;J3KPD9;C9K028;F6XY72;E5RHP0	P15531;P15531-2;E7ERL0;J3KPD9	Nucleoside diphosphate kinase A	NME1;NME2	55.426	39306000	11	21.9898	21.2639	21.6632	23.4917	22.6643	24.1978
0.518232	0.4114	H0YIZ1;P61916;J3KMY5;G3V3E8;E7EMS2;G3V3D1;G3V2V8;P61916-2	H0YIZ1;P61916;J3KMY5;G3V3E8;E7EMS2;G3V3D1;G3V2V8;P61916-2	Epididymal secretory protein E1	NPC2	12.163	213900000	21	24.9801	24.3309	24.5948	25.6075	24.9141	24.6183
0.262828	-0.260026	E9PLK3;P55786-2;P55786;A6NEC2;E9PJY4;E9PJ74;E9PPD4;H0YDG0;E9PRQ5;E9PP11;A6NEC2-3;A6NEC2-2	E9PLK3;P55786-2;P55786;A6NEC2	Puromycin-sensitive aminopeptidase;Puromycin-sensitive aminopeptidase-like protein	NPEPPS;NPEPPSL1	4.5683	14061000	4	23.3565	22.1747	22.5962	22.2361	22.2827	22.8286
0.310219	0.267869	P06748-2;P06748;P06748-3;E5RI98;E5RGW4	P06748-2;P06748;P06748-3	Nucleophosmin	NPM1	110.78	550990000	58	25.639	26.4735	25.7335	25.8136	26.2131	26.623
0.914556	0.52869	D6RH31;Q6UXI9-2;Q6UXI9-5;Q6UXI9;Q6UXI9-4;Q6UXI9-6;Q6UXI9-3	D6RH31;Q6UXI9-2;Q6UXI9-5;Q6UXI9;Q6UXI9-4;Q6UXI9-6;Q6UXI9-3	Nephronectin	NPNT	5.1815	22347000	3	22.0677	22.4204	22.9665	23.1231	22.8917	23.0259
0.696782	0.614827	C9JYY6;F8W775;Q92823-3;Q92823-4;Q92823-6;Q92823-2;Q92823;Q92823-5;A0A087X2B3	C9JYY6;F8W775;Q92823-3;Q92823-4;Q92823-6;Q92823-2;Q92823;Q92823-5;A0A087X2B3	Neuronal cell adhesion molecule	NRCAM	4.3052	3508000	2	21.3025	22.4083	22.3356	22.9868	22.5372	22.367
2.11448	1.1181	Q9UNZ2-6;Q9UNZ2;Q9UNZ2-5;F2Z2K0;Q9UNZ2-4	Q9UNZ2-6;Q9UNZ2;Q9UNZ2-5;F2Z2K0;Q9UNZ2-4	NSFL1 cofactor p47	NSFL1C	2.3588	6437700	3	21.6759	21.9729	21.3034	22.7435	22.5836	22.9793
0.213321	0.437773	Q02818;H7BZI1;C9JKZ2;C9JBD3;C9J3C1	Q02818;H7BZI1;C9JKZ2	Nucleobindin-1	NUCB1	7.065	99043000	15	22.7286	22.5197	24.7035	23.0258	23.8894	24.35
0.871815	0.982335	Q9H1E3;Q9H1E3-2	Q9H1E3;Q9H1E3-2	Nuclear ubiquitous casein and cyclin-dependent kinase substrate 1	NUCKS1	79.643	18094000	9	20.7766	21.6447	22.2778	22.2012	22.3144	23.1305
0.0488128	-0.0664558	Q9Y266	Q9Y266	Nuclear migration protein nudC	NUDC	2.6666	24102000	5	22.4067	22.4321	23.0607	23.2157	22.6903	21.7942
0.134307	0.343989	O43809	O43809	Cleavage and polyadenylation specificity factor subunit 5	NUDT21	7.3001	6333600	7	21.5081	22.7408	21.8968	21.4314	24.1313	21.6149
0.206936	0.590911	A6NFX8;Q9UKK9;A6NCQ0;A6NJU6;H0YEY4;C9JYY9	A6NFX8;Q9UKK9;A6NCQ0;A6NJU6	ADP-sugar pyrophosphatase	NUDT5	7.9411	24414000	7	21.2497	20.4021	23.0029	20.7391	22.1943	23.494
0.0857379	0.111408	P61970;H3BRV9	P61970;H3BRV9	Nuclear transport factor 2	NUTF2	12.325	264780000	25	24.4494	25.329	25.1027	24.351	25.2354	25.629
0.420347	-0.811241	A0A0G2JQK5;Q6DKJ4	A0A0G2JQK5;Q6DKJ4	Nucleoredoxin	NXN	2.1161	3172100	1	22.7438	21.7965	23.1265	20.3847	22.0061	22.8423
0.357162	-0.892872	Q86UD1;E9PJ29	Q86UD1;E9PJ29	Out at first protein homolog	OAF	4.1541	40795000	3	20.9651	23.3653	24.3981	21.5804	22.3101	22.1593
0.972754	-2.44241	P20774;Q5TBF5	P20774;Q5TBF5	Mimecan	OGN	104.23	318410000	34	27.0245	25.4093	25.612	22.9286	25.646	22.144
0.750972	0.949544	Q9NRN5;Q9NRN5-2;B4DNG0;Q9NRN5-3	Q9NRN5;Q9NRN5-2;B4DNG0	Olfactomedin-like protein 3	OLFML3	7.2915	50774000	11	21.8189	21.7102	23.1956	23.7933	22.6566	23.1234
0.204894	-0.164318	H7BZ94;P07237;I3L398;H0Y3Z3;I3L4M2;I3NI03;I3L3U6;I3L312;I3L514;I3L0S0;I3L1Y5;I3L3P5	H7BZ94;P07237;I3L398;H0Y3Z3	Protein disulfide-isomerase	P4HB	75.293	118050000	36	23.9141	24.2763	23.6339	23.7388	23.3684	24.2241
0.0107192	0.0111383	J3KNE3;P68402	J3KNE3;P68402	Platelet-activating factor acetylhydrolase IB subunit beta	PAFAH1B2	3.2363	22849000	9	21.7605	22.3755	21.9624	22.3296	22.34	21.4623
0.375462	0.631685	E9PBS1;P22234;P22234-2;D6RF62	E9PBS1;P22234;P22234-2;D6RF62	Multifunctional protein ADE2;Phosphoribosylaminoimidazole-succinocarboxamide synthase;Phosphoribosylaminoimidazole carboxylase	PAICS	2.9452	1445600	8	22.7107	22.2157	23.07	24.6143	22.7304	22.5467
0.360647	0.966169	K7ELW0;Q99497;K7EN27	K7ELW0;Q99497;K7EN27	Protein deglycase DJ-1	PARK7	55.818	230570000	43	24.6134	25.1511	22.2565	23.9448	24.7258	26.2488
1.47341	-1.23858	Q15365;F8VTZ0;F8W0G4;F8VXH9;F8W1G6;H3BRU6;F8VZX2;J3QT27;E9PFP8;Q15366-7;Q15366-8;Q15366-4;Q15366-5;P57721-2;P57721-3;P57721-5;Q15366-6;Q15366-3;Q15366;Q15366-2;P57721-4;P57721	Q15365	Poly(rC)-binding protein 1	PCBP1	16.017	33172000	3	22.9274	23.553	22.2094	21.597	21.6559	21.7212
0.183485	-0.221468	P12004	P12004	Proliferating cell nuclear antigen	PCNA	4.6306	0	3	22.0678	22.522	23.3307	22.2073	22.0858	22.9629
0.105103	-0.328936	Q15113	Q15113	Procollagen C-endopeptidase enhancer 1	PCOLCE	33.78	54661000	6	24.8023	20.9638	22.8507	22.8033	22.6983	22.1283
0.575512	0.419066	Q9UHG2;Q9NPY3	Q9UHG2	ProSAAS;KEP;Big SAAS;Little SAAS;Big PEN-LEN;PEN;Little LEN;Big LEN	PCSK1N	57.666	40162000	13	22.1785	22.2081	22.0523	22.1715	23.2006	22.3239
0.136055	0.294716	K7EQA1;O14737;O14737-2	K7EQA1;O14737;O14737-2	Programmed cell death protein 5	PDCD5	10.461	147260000	8	21.4697	22.0823	23.8244	22.7339	22.1121	23.4145
0.0556393	0.117719	H7BZJ3	H7BZJ3		PDIA3	2.4476	33412000	2	22.6071	22.3459	20.547	21.7355	21.5047	22.6129
0.0357279	-0.0494525	P30101	P30101	Protein disulfide-isomerase A3	PDIA3	13.659	120780000	25	24.0508	22.8878	24.3355	23.6466	23.4799	23.9993
1.17332	-0.550388	P13667	P13667	Protein disulfide-isomerase A4	PDIA4	11.471	41359000	10	23.154	23.4467	23.1847	22.6448	22.4031	23.0864
0.177708	-0.294949	Q15084-3;Q15084;Q15084-4;Q15084-5;Q15084-2	Q15084-3;Q15084;Q15084-4;Q15084-5;Q15084-2	Protein disulfide-isomerase A6	PDIA6	27.216	76261000	27	22.9625	23.6294	23.1968	21.7812	23.7065	23.4162
0.162492	-0.170762	B1AKZ5;Q15121	B1AKZ5;Q15121	Astrocytic phosphoprotein PEA-15	PEA15	48.183	12115000	5	21.6265	22.5843	21.3315	21.8801	21.6659	21.484
0.0887657	0.157853	P30086	P30086	Phosphatidylethanolamine-binding protein 1;Hippocampal cholinergic neurostimulating peptide	PEBP1	126.77	746390000	50	25.5158	27.0107	26.2926	25.6434	26.4062	27.2432
1.46974	0.868443	Q99471-2;Q99471;F8VNW6;F8VQZ2;H3BMQ1;H3BPF6;Q99471-3	Q99471-2;Q99471;F8VNW6;F8VQZ2;H3BMQ1;H3BPF6;Q99471-3	Prefoldin subunit 5	PFDN5	11.709	16025000	8	21.0323	21.7556	21.7486	22.1465	22.3903	22.6051
0.0548199	-0.0364227	P07737;K7EJ44;CON__P02584;I3L3D5	P07737;K7EJ44	Profilin-1	PFN1	94.365	879020000	57	26.4794	26.7737	27.2078	26.937	26.632	26.7826
1.28892	0.74623	C9JQ45;G5E9Q6;P35080-2;P35080;C9J712;C9J0J7;C9J2N0	C9JQ45;G5E9Q6;P35080-2;P35080;C9J712;C9J0J7;C9J2N0	Profilin;Profilin-2	PFN2	7.2992	38334000	8	21.7196	22.3915	21.7871	22.616	22.4826	23.0382
0.177358	-0.461662	P18669;Q8N0Y7;P15259	P18669;Q8N0Y7	Phosphoglycerate mutase 1;Probable phosphoglycerate mutase 4	PGAM1;PGAM4	51.816	159600000	13	23.8946	24.4359	24.4045	21.8381	24.7502	24.7617
0.125396	0.152561	P52209-2;P52209;K7ELN9;K7EPF6;K7EMN2;K7EM49	P52209-2;P52209;K7ELN9	6-phosphogluconate dehydrogenase, decarboxylating	PGD	76.518	118610000	39	24.078	23.4762	23.5709	23.0972	24.4731	24.0125
1.20684	-0.97953	P00558;P00558-2;P07205	P00558;P00558-2	Phosphoglycerate kinase 1	PGK1	175.46	1021000000	85	26.6828	27.906	27.4123	26.6315	26.2287	26.2024
0.013094	0.0312093	P36871-3;P36871;P36871-2	P36871-3;P36871;P36871-2	Phosphoglucomutase-1	PGM1	2.6937	4244200	3	24.0834	22.1351	21.6258	22.293	22.5289	23.1162
0.891675	-1.39993	Q96G03	Q96G03	Phosphoglucomutase-2	PGM2	2.2039	499390	1	22.6208	22.6889	22.4309	21.3478	22.3487	19.8443
0.125744	-0.262062	C9JW96;P35232;C9JZ20;E7ESE2;E9PCW0	C9JW96;P35232;C9JZ20;E7ESE2;E9PCW0	Prohibitin	PHB	3.0945	0	2	22.2549	23.3214	22.0704	23.4059	22.3208	21.1338
0.162755	-0.323613	A0A286YF22;A0A2C9F2M7;O43175;A0A286YFL2;A0A286YFA2;A0A286YER3;A0A286YFC8;A0A286YFB2;A0A286YFM8;A0A286YF34;A0A286YFF3;A0A286YFK5	A0A286YF22;A0A2C9F2M7;O43175;A0A286YFL2;A0A286YFA2;A0A286YER3;A0A286YFC8;A0A286YFB2;A0A286YFM8	D-3-phosphoglycerate dehydrogenase	PHGDH	4.671	34834000	8	22.451	21.3417	23.4334	22.8623	21.3376	22.0554
0.382924	-0.323215	Q9NRX4-2;Q9NRX4	Q9NRX4-2;Q9NRX4	14 kDa phosphohistidine phosphatase	PHPT1	15.509	63002000	13	23.3636	23.1868	23.2717	22.2594	23.1885	23.4045
0.948031	-0.856858	B3KYB6;B3KYB7;A0A0A0MSW4;P48739;P48739-2;P48739-3	B3KYB6;B3KYB7;A0A0A0MSW4;P48739;P48739-2;P48739-3	Phosphatidylinositol transfer protein beta isoform	PITPNB	4.296	0	2	23.0206	21.8393	22.6341	21.8818	21.1597	21.8819
0.166109	-0.151433	P14618;P14618-3;P14618-2;H3BTN5;B4DNK4;H3BQ34;H3BR70;H3BT25;H3BUW1;H3BTJ2;P30613-2;P30613	P14618;P14618-3;P14618-2;H3BTN5;B4DNK4;H3BQ34;H3BR70	Pyruvate kinase PKM;Pyruvate kinase	PKM	150.21	681430000	58	26.2935	26.8957	26.5295	26.4475	25.8971	26.9199
2.04459	0.832935	K7ERZ3;O60664-2;O60664-4;O60664-3;O60664	K7ERZ3;O60664-2;O60664-4;O60664-3;O60664	Perilipin-3	PLIN3	3.8004	3406900	3	22.643	22.3229	22.1609	23.4162	23.1103	23.0991
0.40124	0.332521	Q02809;Q02809-2	Q02809;Q02809-2	Procollagen-lysine,2-oxoglutarate 5-dioxygenase 1	PLOD1	5.2031	23593000	10	22.4292	22.1385	21.8066	23.0598	22.1475	22.1646
0.409795	0.543271	H7C4N2;A0A0A0MSQ0;P13797-3;P13797-2;P13797	H7C4N2;A0A0A0MSQ0;P13797-3;P13797-2;P13797	Plastin-3	PLS3	4.696	9089700	5	21.6994	21.6386	23.2268	22.9079	22.3001	22.9867
0.105329	-0.148941	P55058;P55058-3;P55058-2;P55058-4	P55058;P55058-3;P55058-2;P55058-4	Phospholipid transfer protein	PLTP	54.546	232730000	33	25.8091	24.8775	24.3058	24.3624	25.2537	24.9295
0.189795	-0.166292	Q6UX71-2;Q6UX71	Q6UX71-2;Q6UX71	Plexin domain-containing protein 2	PLXDC2	12.868	0	2	21.7696	22.234	22.0498	21.3365	21.8197	22.3983
0.417959	-0.245893	E2PU09;O15031	E2PU09;O15031	Plexin-B2	PLXNB2	3.5113	0	2	22.3841	22.277	21.8292	22.2842	21.7644	21.7041
0.0708168	-0.233851	O00592-2;O00592	O00592-2;O00592	Podocalyxin	PODXL	6.277	40067000	3	22.227	21.1735	24.4	23.564	21.2931	22.2418
0.340926	-0.504907	Q15063-5	Q15063-5	Periostin	POSTN	2.5535	191170000	5	23.074	22.6733	21.4808	21.1615	22.4339	22.118
0.873226	-1.06125	Q15181;Q5SQT6	Q15181	Inorganic pyrophosphatase	PPA1	5.4305	12567000	6	23.4156	22.5328	22.0774	20.8893	22.2977	21.655
1.38471	-1.00343	P62937;F8WE65;C9J5S7;P62937-2;P0DN26;A0A0H2UH34;A0A0B4J2A2;A0A075B767;A0A075B759;Q9Y536;F5H284;E5RIZ5;P0DN37	P62937;F8WE65;C9J5S7;P62937-2	Peptidyl-prolyl cis-trans isomerase A;Peptidyl-prolyl cis-trans isomerase A, N-terminally processed;Peptidyl-prolyl cis-trans isomerase	PPIA	256.81	1752900000	96	27.731	28.3727	28.276	26.9384	27.6601	26.7709
0.352106	-0.391205	P23284	P23284	Peptidyl-prolyl cis-trans isomerase B	PPIB	9.204	123730000	18	22.9792	24.1258	24.5065	23.5413	23.5158	23.3807
0.187375	-0.347198	P45877	P45877	Peptidyl-prolyl cis-trans isomerase C	PPIC	2.1535	11581000	5	22.236	21.7859	22.6811	20.5822	22.3765	22.7027
0.805233	0.988452	F8WE71;C9J9S3;C9JP48;A0A087WYY5;F5H1L6;E7ETD8;F5H037;E9PMD7;F8VR82;F8VYE8;F8W0W8;P36873;P62140;P62136;P36873-2;P62136-2	F8WE71;C9J9S3;C9JP48;A0A087WYY5;F5H1L6;E7ETD8;F5H037;E9PMD7;F8VR82;F8VYE8;F8W0W8;P36873;P62140;P62136;P36873-2;P62136-2	Serine/threonine-protein phosphatase;Serine/threonine-protein phosphatase PP1-gamma catalytic subunit;Serine/threonine-protein phosphatase PP1-beta catalytic subunit;Serine/threonine-protein phosphatase PP1-alpha catalytic subunit	PPP1CB;PPP1CC;PPP1CA	4.6318	27428000	7	20.2942	22.0904	21.7634	22.3994	22.1319	22.5821
0.0813321	0.0967598	P30153;B3KQV6;C9J9C1;E9PH38	P30153;B3KQV6	Serine/threonine-protein phosphatase 2A 65 kDa regulatory subunit A alpha isoform	PPP2R1A	7.5217	47826000	10	22.9203	22.746	22.7836	23.6106	22.9609	22.1687
1.03592	-1.15073	A8MU39;H0YDU8;P53041	A8MU39;H0YDU8;P53041	Serine/threonine-protein phosphatase;Serine/threonine-protein phosphatase 5	PPP5C	2.62	2487200	2	22.0374	23.1192	23.6753	21.7563	21.4628	22.1606
0.554483	0.741902	Q06830;A0A0A0MSI0;A0A0A0MRQ5;H7C3T4;Q13162	Q06830;A0A0A0MSI0;A0A0A0MRQ5	Peroxiredoxin-1	PRDX1	61.183	974660000	62	25.9028	27.0494	26.773	26.4611	27.3619	28.1281
0.678557	0.714673	P32119;A6NIW5;P32119-2	P32119;A6NIW5	Peroxiredoxin-2	PRDX2	24.323	594750000	35	25.4224	26.6109	25.3198	26.3241	26.2005	26.9726
0.683344	0.964859	P30048-2;P30048	P30048-2;P30048	Thioredoxin-dependent peroxide reductase, mitochondrial	PRDX3	2.849	39128000	6	22.9528	20.743	22.0067	22.8578	22.7829	22.9564
0.0539602	-0.128493	P30044-2;P30044-3;P30044;P30044-4	P30044-2;P30044-3;P30044;P30044-4	Peroxiredoxin-5, mitochondrial	PRDX5	27.983	58340000	13	22.5001	21.3908	23.314	22.0286	23.4169	21.374
0.0676134	-0.0844447	P30041	P30041	Peroxiredoxin-6	PRDX6	7.5234	47854000	9	21.4976	22.5584	22.2356	21.5974	22.6011	21.8398
1.18898	-0.991809	K7EPW7;K7ELL7;P14314-2;P14314;K7EIP3;K7EKX1;K7EJ70	K7EPW7;K7ELL7;P14314-2;P14314	Glucosidase 2 subunit beta	PRKCSH	5.2764	0	3	22.6254	22.2834	22.7305	21.9228	20.8182	21.9228
1.78439	1.29052	C9JIZ6;P07602;P07602-2;P07602-3;A0A0J9YXB8;Q5BJH1	C9JIZ6;P07602;P07602-2;P07602-3	Prosaposin;Saposin-A;Saposin-B-Val;Saposin-B;Saposin-C;Saposin-D	PSAP	29.263	328420000	32	24.9781	24.1881	25.0158	26.328	26.0214	25.7042
0.750278	-1.28651	Q9Y617;Q9Y617-2	Q9Y617;Q9Y617-2	Phosphoserine aminotransferase	PSAT1	6.9059	15686000	6	23.2893	22.7678	24.1064	21.2122	23.4475	21.6444
0.373575	0.6693	O75475-3;O75475-2;O75475	O75475-3;O75475-2;O75475	PC4 and SFRS1-interacting protein	PSIP1	2.4139	11607000	6	21.7539	22.7144	21.7647	23.2353	23.602	21.4036
0.0679885	-0.16327	A0A024RA52;P25787;H7C402;H3BT36;C9JCK5	A0A024RA52;P25787;H7C402;H3BT36;C9JCK5	Proteasome subunit alpha type;Proteasome subunit alpha type-2	PSMA2	9.7139	30454000	3	24.0411	22.3416	23.4793	22.6529	22.2676	24.4517
0.206344	0.172131	P25788-2;P25788;G3V3W4;G3V5N4;G3V4X5	P25788-2;P25788	Proteasome subunit alpha type-3	PSMA3	5.1663	25150000	8	22.8484	22.5306	22.6216	22.9498	22.2582	23.309
0.608236	-0.77213	P28066;P28066-2	P28066;P28066-2	Proteasome subunit alpha type-5	PSMA5	31.682	30003000	3	23.7015	23.6058	22.3422	22.6366	21.741	22.9555
0.432931	1.06185	O14818;H0Y586;O14818-4;O14818-2;Q8TAA3-2;Q8TAA3-5;Q8TAA3;F5GY34;A0A087WYS6	O14818;H0Y586;O14818-4;O14818-2;Q8TAA3-2;Q8TAA3-5;Q8TAA3	Proteasome subunit alpha type-7;Proteasome subunit alpha type-7-like	PSMA7;PSMA8	6.4618	83055000	6	21.6299	21.4255	21.8016	21.632	21.6412	24.7693
0.180273	0.296477	P20618	P20618	Proteasome subunit beta type-1	PSMB1	2.6556	3478500	6	22.3676	20.4255	22.0597	22.2488	21.7218	21.7717
0.304299	-0.425237	P28070	P28070	Proteasome subunit beta type-4	PSMB4	2.8805	9053300	5	23.6998	22.7459	22.4662	23.2658	21.7814	22.5889
0.860364	0.974738	Q99436	Q99436	Proteasome subunit beta type-7	PSMB7	3.3041	38890000	10	22.996	22.3419	21.4136	23.5662	22.7186	23.3909
1.39087	1.28936	Q13200;F8WBS8;C9JPC0;Q13200-2;Q13200-3	Q13200;F8WBS8;C9JPC0;Q13200-2;Q13200-3	26S proteasome non-ATPase regulatory subunit 2	PSMD2	4.02	2252400	2	22.5301	22.7711	21.8597	23.9389	23.0102	24.08
0.0790198	0.164961	Q06323;H0YKK6;Q06323-3;Q06323-2	Q06323;H0YKK6;Q06323-3;Q06323-2	Proteasome activator complex subunit 1	PSME1	2.0029	15218000	5	22.3325	23.6243	22.8396	23.1181	21.9905	24.1826
0.623837	1.01016	H0YM70;A0A087X1Z3;Q9UL46;H0YKU2	H0YM70;A0A087X1Z3;Q9UL46	Proteasome activator complex subunit 2	PSME2	9.3247	12303000	3	20.7421	22.1457	23.1886	22.7209	23.0919	23.2942
0.21141	-0.587635	K7ES59;K7EKJ7;A6NLN1;A0A0U1RRM4;P26599;P26599-2;P26599-3;K7ELW5	K7ES59;K7EKJ7;A6NLN1;A0A0U1RRM4;P26599;P26599-2;P26599-3;K7ELW5	Polypyrimidine tract-binding protein 1	PTBP1	30.133	192440000	23	24.0658	25.5196	24.5801	22.2753	24.4717	25.6555
0.210204	0.227007	Q13308-5;Q13308-4;Q13308;Q13308-6;H7C5L0;Q13308-2;Q86X91;Q13308-3	Q13308-5;Q13308-4;Q13308;Q13308-6;H7C5L0;Q13308-2	Inactive tyrosine-protein kinase 7	PTK7	6.9721	24269000	5	22.6852	21.9036	22.9716	22.4431	23.287	22.5114
0.84299	1.70803	B8ZZQ6;P06454-2;P06454	B8ZZQ6;P06454-2;P06454	Prothymosin alpha;Prothymosin alpha, N-terminally processed;Thymosin alpha-1	PTMA	55.868	96520000	8	20.8571	22.2643	22.7392	22.8452	25.1634	22.976
1.34655	1.48474	F5H7R9;F5GXR3;P20962	F5H7R9;F5GXR3;P20962	Parathymosin	PTMS	5.2657	21233000	8	21.9508	21.3852	21.69	22.5295	24.1227	22.828
0.180958	0.397317	C9JR52;P21246	C9JR52;P21246	Pleiotrophin	PTN	3.6593	56852000	7	21.9963	22.385	22.7017	21.2777	22.928	24.0692
0.606249	0.867865	P23471-3;P23471-2;P23471	P23471-3;P23471-2;P23471	Receptor-type tyrosine-protein phosphatase zeta	PTPRZ1	5.1336	71898000	9	21.5038	22.5113	21.7507	22.9724	23.6651	21.7319
0.151474	-0.383806	Q92626	Q92626	Peroxidasin homolog	PXDN	19.562	46447000	11	24.0777	21.5202	23.7591	23.7058	22.4297	22.0701
0.0351796	0.0481491	A0A0U1RQC3;F2Z2V6;A0A0U1RQM8;A0A0U1RQU2;A0A0U1RRI9;A0A0U1RQE9;C9J165;A0A0U1RQT0;P47897-2;P47897	A0A0U1RQC3;F2Z2V6;A0A0U1RQM8;A0A0U1RQU2;A0A0U1RRI9;A0A0U1RQE9;C9J165;A0A0U1RQT0;P47897-2;P47897	Glutamine--tRNA ligase	QARS	2.6508	0	1	22.3628	23.1336	22.1757	23.1721	21.9418	22.7026
0.188353	-0.131256	O00391-2;O00391;A8MXT8	O00391-2;O00391	Sulfhydryl oxidase 1	QSOX1	7.6923	36827000	15	22.266	21.8565	22.7646	22.0745	22.2198	22.1992
0.413976	1.05937	B5MDF5;J3KQE5;P62826;F5H018;H0YFC6;B4DV51	B5MDF5;J3KQE5;P62826;F5H018;H0YFC6	GTP-binding nuclear protein Ran	RAN	5.6452	151970000	21	21.0313	24.2867	24.1172	23.8523	24.06	24.7009
1.43507	-0.808121	C9JXG8;C9JGV6;F6WQW2;P43487-2;P43487	C9JXG8;C9JGV6;F6WQW2;P43487-2;P43487	Ran-specific GTPase-activating protein	RANBP1	2.8385	9066300	1	22.8561	22.2983	22.8857	21.6653	21.7218	22.2286
0.682721	0.678181	P61224-2;P61224-3;P62834;P61224;A6NIZ1;F8WBC0;F5H4H0;F5GYH7;F5H077;F5GWU8;F5H491;F5H0B7;F5H500;F5H823;B7ZB78;F5GZG1;F5H6R7;F5H004;A0A075B6Q0;F5GYB5;F5GX62;E7ESV4;F5H7Y6;P61224-4	P61224-2;P61224-3;P62834;P61224;A6NIZ1;F8WBC0;F5H4H0;F5GYH7;F5H077;F5GWU8;F5H491;F5H0B7;F5H500;F5H823;B7ZB78;F5GZG1;F5H6R7;F5H004;A0A075B6Q0;F5GYB5;F5GX62;E7ESV4;F5H7Y6;P61224-4	Ras-related protein Rap-1b;Ras-related protein Rap-1A;Ras-related protein Rap-1b-like protein	RAP1B;RAP1A	18.986	18378000	9	21.7717	22.1046	22.7939	22.7618	23.5421	22.401
0.477982	-0.75565	A0A0A0MTB9;H0YAK8;A0A0A0MQT0;P09455;P09455-2;P09455-3	A0A0A0MTB9;H0YAK8;A0A0A0MQT0;P09455;P09455-2;P09455-3	Retinol-binding protein 1	RBP1	3.8794	100420000	5	23.2727	24.6412	22.6011	22.4192	22.4141	23.4147
0.134095	0.25112	Q5VY30;P02753	Q5VY30;P02753	Retinol-binding protein 4;Plasma retinol-binding protein(1-182);Plasma retinol-binding protein(1-181);Plasma retinol-binding protein(1-179);Plasma retinol-binding protein(1-176)	RBP4	14.579	64385000	9	23.6155	21.6036	21.8803	22.4908	22.2042	23.1578
0.286924	-0.596171	E9PP27;Q15293-2;Q15293	E9PP27;Q15293-2;Q15293	Reticulocalbin-1	RCN1	15.313	21440000	9	22.529	21.9657	20.893	22.3218	21.3285	19.9488
0.300196	0.730911	A0A2R8Y5S7;P35241;P35241-5;A0A2R8Y7M3;P35241-4;P35241-3;P35241-2;A0A2R8Y4H6	A0A2R8Y5S7;P35241;P35241-5;A0A2R8Y7M3;P35241-4	Radixin	RDX	5.1607	15960000	7	21.0883	23.3123	21.1283	23.3962	21.2635	23.0619
0.227859	-0.410786	J3KQ66;P78509-3;P78509-2;P78509	J3KQ66;P78509-3;P78509-2;P78509	Reelin	RELN	5.3295	11797000	3	22.2523	21.8477	24.0255	21.9417	22.7152	22.2361
0.117517	-0.203346	C9JRM1;C9JNR4;C9JX21;P61586	C9JRM1;C9JNR4;C9JX21;P61586	Transforming protein RhoA	RHOA	4.5196	5373800	6	21.5422	22.8991	23.2377	22.8106	21.6499	22.6084
0.163493	0.673902	Q6F5E8-2;Q6F5E8	Q6F5E8-2;Q6F5E8	Leucine-rich repeat-containing protein 16C	RLTPR	1.7826	47102000	2	24.2095	21.2455	22.8677	25.9608	22.7174	21.6662
0.536574	-0.548494	P62906	P62906	60S ribosomal protein L10a	RPL10A	4.0423	43675000	12	22.4307	23.0277	22.7443	21.854	21.6896	23.0136
0.319221	-0.260166	Q5VVC8;P62913-2;P62913	Q5VVC8;P62913-2;P62913	60S ribosomal protein L11	RPL11	1.8659	3624100	0	22.0397	21.7309	22.2513	21.7467	21.2315	22.2632
0.539912	-0.71528	P30050-2;P30050	P30050-2;P30050	60S ribosomal protein L12	RPL12	1.8262	10137000	1	22.7295	23.1788	22.9007	23.3379	21.4646	21.8607
1.47255	0.901564	J3KRB3;A0A087WWH0;J3QS96;A0A087WXM6;J3QQT2;J3QLC8;J3KRX5;A0A0A0MRF8;A0A0A6YYL6;P18621-2;P18621;P18621-3;A0A087WY81	J3KRB3;A0A087WWH0;J3QS96;A0A087WXM6;J3QQT2;J3QLC8;J3KRX5;A0A0A0MRF8;A0A0A6YYL6;P18621-2;P18621;P18621-3;A0A087WY81	60S ribosomal protein L17	RPL17;RPL17-C18orf32	3.2745	7648900	4	21.4474	22.1116	21.8517	22.3353	23.0551	22.725
0.0846809	-0.193669	F8VUA6;G3V203;H0YHA7;J3QQ67;Q07020-2;Q07020	F8VUA6;G3V203;H0YHA7;J3QQ67;Q07020-2;Q07020	60S ribosomal protein L18	RPL18	2.3717	3695700	1	22.4556	21.8522	22.5726	20.6632	22.296	23.3402
0.318045	-0.548947	C9JXB8;C9JNW5;P83731	C9JXB8;C9JNW5;P83731	60S ribosomal protein L24	RPL24	2.3859	5565200	1	23.3285	22.778	22.0645	23.2721	22.0669	21.1852
0.0380213	-0.0455672	A0A3B3ITT5;P47914	A0A3B3ITT5;P47914	60S ribosomal protein L29	RPL29	2.1823	10783000	5	23.1275	22.7369	23.0709	22.6578	22.4421	23.6987
0.386577	0.415124	G5E9G0;P39023;B5MCW2	G5E9G0;P39023;B5MCW2	60S ribosomal protein L3	RPL3	2.1365	16575000	2	22.7964	21.5467	21.5083	22.6234	22.3998	22.0735
0.308825	0.509057	Q02878	Q02878	60S ribosomal protein L6	RPL6	8.7655	952790	3	22.544	22.2496	21.27	21.9168	22.044	23.63
0.48723	-0.312178	F8VS58;F8VQY6;F8VRK7;G3V210;F8VZS0;F8VU65;F8VWS0;P05388-2;Q8NHW5;P05388;F8VWV4;F8VPE8;F8VW21	F8VS58;F8VQY6;F8VRK7;G3V210;F8VZS0;F8VU65;F8VWS0;P05388-2;Q8NHW5;P05388;F8VWV4;F8VPE8;F8VW21	60S acidic ribosomal protein P0;60S acidic ribosomal protein P0-like	RPLP0;RPLP0P6	8.2011	30950000	18	22.1051	22.4745	21.9329	21.405	22.0365	22.1345
0.0886514	-0.202427	P05386	P05386	60S acidic ribosomal protein P1	RPLP1	27.69	127070000	11	24.4414	24.401	23.6123	23.9833	22.6064	25.2578
0.195494	0.83632	P05387;H0YDD8	P05387	60S acidic ribosomal protein P2	RPLP2	6.3951	192940000	17	20.9917	24.8157	24.7901	22.345	24.9509	25.8106
0.354374	-0.381817	P25398	P25398	40S ribosomal protein S12	RPS12	31.541	20403000	19	22.0701	21.4315	20.9491	20.9311	21.7013	20.6728
0.305534	0.39057	J3KMX5;P62277	J3KMX5;P62277	40S ribosomal protein S13	RPS13	9.8039	4729400	6	22.3627	22.4429	20.9059	22.4756	22.4039	22.0038
0.556	0.773523	H3BNG3;H0YE27;H0YEN5;E9PPT0;E9PMM9;E9PQD7;P15880	H3BNG3;H0YE27;H0YEN5;E9PPT0;E9PMM9;E9PQD7;P15880	40S ribosomal protein S2	RPS2	10.174	14883000	6	22.0219	23.4526	21.7928	23.8311	23.0486	22.7081
0.3704	-0.423522	E5RIP1;E5RJX2;P60866;P60866-2	E5RIP1;E5RJX2;P60866;P60866-2	40S ribosomal protein S20	RPS20	9.0241	7164600	7	22.999	23.1705	23.0424	23.5971	22.2206	22.1237
1.46763	-0.956673	P62081;B5MCP9	P62081;B5MCP9	40S ribosomal protein S7	RPS7	3.9519	42926000	13	22.9306	23.6494	22.7497	22.0046	22.4044	22.0507
0.167572	0.34842	F8WD59;C9J9K3;A0A0C4DG17;P08865	F8WD59;C9J9K3;A0A0C4DG17;P08865	40S ribosomal protein SA	RPSA	5.7211	34604000	3	21.6031	22.4737	23.0428	22.0273	24.0478	22.0898
1.5667	-2.26747	P60903	P60903	Protein S100-A10	S100A10	7.7431	103330000	10	24.9228	24.3331	22.8171	21.3207	21.8931	22.0568
0.675863	-0.943145	P31949	P31949	Protein S100-A11;Protein S100-A11, N-terminally processed	S100A11	22.856	74835000	10	21.7579	21.699	22.5658	20.3573	20.6463	22.1896
0.210712	-0.636014	P82979;F8VS12;F8VZQ9;H0YHG0	P82979;F8VS12;F8VZQ9;H0YHG0	SAP domain-containing ribonucleoprotein	SARNP	11.434	10915000	5	24.7975	21.1084	22.1558	21.365	22.0215	22.7671
1.66613	-1.01215	P13521;C9JQI2	P13521;C9JQI2	Secretogranin-2;Secretoneurin;Manserin	SCG2	12.566	11877000	10	22.8898	22.9451	23.1894	21.5546	21.976	22.4572
1.72284	1.24033	Q8WXD2;Q8WXD2-2	Q8WXD2	Secretogranin-3	SCG3	51.496	57176000	11	22.7847	22.1066	23.0697	23.7233	24.2057	23.753
0.717642	0.676567	E5RJB8;E5RHU3;E7ESK6;E9PBI9;P34741	E5RJB8;E5RHU3;E7ESK6;E9PBI9;P34741	Syndecan;Syndecan-2	SDC2	1.9891	0	3	21.4949	21.9001	22.709	22.3274	22.6487	23.1576
0.113849	0.227548	G5EA09;O00560-3;O00560-2;O00560	G5EA09;O00560-3;O00560-2;O00560	Syntenin-1	SDCBP	2.2789	15237000	3	22.0635	23.2485	22.034	22.023	22.1208	23.8849
0.535459	0.646872	H0Y3T6;Q9BRK5-5;Q9BRK5-2;Q9BRK5-6;Q9BRK5	H0Y3T6;Q9BRK5-5;Q9BRK5-2;Q9BRK5-6;Q9BRK5	45 kDa calcium-binding protein	SDF4	12.061	4191300	4	21.7118	22.5445	21.3602	23.1897	21.804	22.5634
0.634601	-2.22375	A0A024R6I7;P01009;A0A0G2JRN3;P01009-2;P01009-3;G3V2B9;G3V544;G3V5R8;G3V387;A0A0B4J278	A0A024R6I7;P01009;A0A0G2JRN3;P01009-2;P01009-3	Alpha-1-antitrypsin;Short peptide from AAT	SERPINA1	323.31	1930800000	143	27.1503	27.2197	27.3485	22.5512	27.9568	24.5394
0.102485	-0.143014	A0A2R8YD12;A0A024QZX5;A0A087X1N8;P35237;A0A2R8Y6A7	A0A2R8YD12;A0A024QZX5;A0A087X1N8;P35237;A0A2R8Y6A7	Serpin B6	SERPINB6	3.5239	2152100	5	22.5181	21.4094	22.715	22.1256	21.5362	22.5517
0.327443	0.55336	P50453;H7BXK7;C9J7N5;A0A1B0GU38;A0A0C4DGW9;P30740-2;P50452-2;P50452;P30740;O75830	P50453	Serpin B9	SERPINB9	2.0182	1856300	2	20.824	22.1674	23.0138	23.0552	22.5104	22.0997
0.0944379	0.158389	P01008;Q8TCE1	P01008;Q8TCE1	Antithrombin-III	SERPINC1	6.8397	17634000	9	22.9828	22.0662	21.0611	22.1366	22.6123	21.8364
0.362732	0.454128	P07093-2;P07093;P07093-3;C9JN98	P07093-2;P07093;P07093-3;C9JN98	Glia-derived nexin	SERPINE2	2.8686	26026000	1	22.7531	21.6384	21.6481	23.1973	22.0094	22.1953
0.573015	0.759328	P36955;I3L4N7;I3L107;I3L4F9;I3L4Z0;CON__Q95121;I3L2R7;I3L425;I3L3Z3;I3L1U4	P36955	Pigment epithelium-derived factor	SERPINF1	169.82	1953700000	108	28.4769	27.1299	27.4197	29.1907	28.3915	27.7223
0.245789	-0.410409	P05155-2;P05155;P05155-3;H9KV48;E9PGN7	P05155-2;P05155;P05155-3;H9KV48;E9PGN7	Plasma protease C1 inhibitor	SERPING1	8.1656	50401000	7	23.4264	22.7498	21.7769	21.4716	22.2051	23.0451
0.23163	-0.21752	P50454;E9PK86;E9PMI5;E9PR70;E9PPV6;E9PJH8;E9PIG2;E9PRS3;E9PNX1;E9PLA6;E9PKH2;H0YEP8;E9PQ34	P50454;E9PK86;E9PMI5;E9PR70;E9PPV6;E9PJH8;E9PIG2;E9PRS3;E9PNX1	Serpin H1	SERPINH1	171.99	249480000	36	25.688	25.0632	24.483	24.6723	24.8227	25.0866
0.037775	0.12442	A0A0C4DFV9;Q01105-3;Q01105-4;Q01105-2;Q01105;A0A087X027;P0DME0	A0A0C4DFV9;Q01105-3;Q01105-4;Q01105-2;Q01105;A0A087X027;P0DME0	Protein SET;Protein SETSIP	SET;SETSIP	33.287	99230000	14	22.3933	24.1343	23.8482	22.1041	23.2122	25.4328
0.783947	0.498986	P23246;P23246-2;H0Y9K7	P23246;P23246-2	Splicing factor, proline- and glutamine-rich	SFPQ	7.2717	20747000	11	21.659	21.7917	22.2515	22.6647	21.9367	22.5979
0.352207	0.781242	Q8N474;Q6ZSL4	Q8N474;Q6ZSL4	Secreted frizzled-related protein 1	SFRP1	8.7605	72875000	17	23.3089	21.0553	23.185	22.542	24.3936	22.9574
0.25833	0.587451	Q5T123;Q9H299	Q5T123;Q9H299	SH3 domain-binding glutamic acid-rich-like protein 3	SH3BGRL3	1.9509	22590000	2	23.7495	21.4158	22.5146	22.7865	24.3261	22.3297
0.586601	0.916297	P63208;E7ERH2;F8W8N3;E5RJR5;P63208-2;E5RGM3	P63208;E7ERH2;F8W8N3;E5RJR5;P63208-2	S-phase kinase-associated protein 1	SKP1	9.2199	39524000	11	21.5509	22.765	22.0852	22.1428	22.8175	24.1897
0.57763	0.946283	F8VVM2;Q00325-2;Q00325	F8VVM2;Q00325-2;Q00325	Phosphate carrier protein, mitochondrial	SLC25A3	10.108	3185300	2	21.603	21.6901	22.1791	24.1588	22.3112	21.841
0.135923	-0.257667	O14745;J3QRP6;O14745-2	O14745;J3QRP6	Na(+)/H(+) exchange regulatory cofactor NHE-RF1	SLC9A3R1	18.408	30939000	12	21.2446	22.0077	23.6021	21.8843	22.173	22.0241
0.326914	0.334712	A0A0A0MSC8;O75094-3;O75094;O75094-4;O75094-2	A0A0A0MSC8;O75094-3;O75094;O75094-4;O75094-2	Slit homolog 3 protein	SLIT3	4.3272	4340700	5	22.0479	23.0357	21.9661	23.0889	22.7162	22.2487
0.200211	0.34657	J3QLI9;P62314	J3QLI9;P62314	Small nuclear ribonucleoprotein Sm D1	SNRPD1	10.319	27728000	9	21.9735	22.5848	22.3807	21.4529	22.8825	23.6434
0.16396	0.406076	P62318-2;P62318	P62318-2;P62318	Small nuclear ribonucleoprotein Sm D3	SNRPD3	3.1046	10862000	2	22.8284	23.2338	21.4211	23.0264	21.5379	24.1373
0.208764	0.223417	P04179-4;P04179-2;P04179;F5H3C5;F5H4R2;F5GYZ5;P04179-3;G8JLJ2;G5E9P6;F5GXZ9	P04179-4;P04179-2;P04179;F5H3C5;F5H4R2;F5GYZ5;P04179-3	Superoxide dismutase [Mn], mitochondrial	SOD2	10.665	16195000	7	22.1905	22.8263	21.4787	22.5451	22.1049	22.5156
0.615338	0.340884	P09486;F5GY03;E5RK62	P09486;F5GY03	SPARC	SPARC	172.63	2845400000	93	28.3878	27.6932	28.301	28.3759	28.3245	28.7042
0.582114	0.594025	Q14515-2;Q14515	Q14515-2;Q14515	SPARC-like protein 1	SPARCL1	10.782	4675800	7	22.763	21.5967	21.5924	22.7309	22.1163	22.8869
0.29517	-0.352641	P10451-4;P10451-5;P10451-2;P10451	P10451-4;P10451-5;P10451-2;P10451	Osteopontin	SPP1	3.1899	18269000	8	22.8982	22.1281	22.82	21.9627	23.0882	21.7375
0.263795	-0.376031	A0A0D9SF54;A0A0D9SGF6;Q13813-3;Q13813;Q13813-2	A0A0D9SF54;A0A0D9SGF6;Q13813-3;Q13813;Q13813-2	Spectrin alpha chain, non-erythrocytic 1	SPTAN1	4.7591	11149000	8	22.5661	21.7349	23.2971	21.476	22.3854	22.6087
0.191127	-0.26335	A0A087WUZ3;Q01082	A0A087WUZ3;Q01082	Spectrin beta chain, non-erythrocytic 1	SPTBN1	1.9974	6528200	2	22.2678	22.0697	23.2131	22.2813	21.5601	22.919
0.430365	-0.77135	H0YLA2;P37108	H0YLA2;P37108	Signal recognition particle 14 kDa protein	SRP14	2.014	4955800	4	24.2549	22.6047	21.9623	22.8614	21.7533	21.8932
0.282161	0.440056	P49458;E9PE20;P49458-2	P49458;E9PE20;P49458-2	Signal recognition particle 9 kDa protein	SRP9	3.4536	28281000	8	23.2425	23.1027	21.3687	23.1668	22.6578	23.2096
0.00011515	0.000293732	J3KTL2;Q07955;Q07955-3;Q07955-2;J3QQV5;J3KSW7;S4R3G0;J3KSR8;Q13242	J3KTL2;Q07955;Q07955-3;Q07955-2	Serine/arginine-rich splicing factor 1	SRSF1	5.9358	24021000	12	21.9519	22.2832	22.9377	22.5683	20.9624	23.6429
0.521855	0.455145	P05455;E9PFL9;E7ERC4;E9PGX9	P05455;E9PFL9;E7ERC4	Lupus La protein	SSB	2.1302	9882900	3	22.8388	22.1708	21.8435	22.5571	22.4326	23.2287
1.0594	1.33197	O76061	O76061	Stanniocalcin-2	STC2	1.8768	1679600	1	21.811	21.5557	23.1358	22.8386	23.8428	23.8169
0.482318	0.913186	P31948;P31948-2;P31948-3;F5H783;F5GXD8;H0YGI8	P31948;P31948-2;P31948-3	Stress-induced-phosphoprotein 1	STIP1	22.702	78207000	33	21.9855	23.3397	23.3635	22.8051	23.5035	25.1197
0.339937	1.61276	A2A2D0;P16949;P16949-2	A2A2D0;P16949;P16949-2	Stathmin	STMN1	11.453	286150000	15	22.1867	24.8446	21.722	21.1246	26.3	26.1669
0.671212	-1.09036	E5RGX5;Q93045;Q93045-2	E5RGX5;Q93045;Q93045-2	Stathmin;Stathmin-2	STMN2	1.886	8798100	2	22.1188	21.9024	22.8767	21.3434	22.3057	19.9777
0.0678761	0.145155	P53999;D6RC37;D6R970	P53999;D6RC37;D6R970	Activated RNA polymerase II transcriptional coactivator p15	SUB1	4.3891	1327700	4	22.9354	22.0996	22.4633	23.1198	23.5589	21.255
0.264575	0.932698	P61956-2;P61956;A8MUA9;A8MU27;Q6EEV6;P55854;P55854-2	P61956-2;P61956;A8MUA9;A8MU27;Q6EEV6;P55854;P55854-2	Small ubiquitin-related modifier 2;Small ubiquitin-related modifier 4;Small ubiquitin-related modifier 3	SUMO2;SUMO3;SUMO4	4.2851	170500000	13	24.0092	21.0761	22.1572	22.1293	22.3335	25.5776
0.37883	0.401952	O60506-4;O60506-3;O60506-2;O60506;F6UXX1;B7Z645;O60506-5	O60506-4;O60506-3;O60506-2;O60506;F6UXX1;B7Z645;O60506-5	Heterogeneous nuclear ribonucleoprotein Q	SYNCRIP	7.3975	19862000	16	22.7261	21.9069	21.5337	22.9957	22.2677	22.1091
0.422539	-0.827356	A0A075B7D9;H3BPE7;P35637-2;P35637;Q92804-2;Q92804	A0A075B7D9;H3BPE7;P35637-2;P35637;Q92804-2;Q92804	RNA-binding protein FUS;TATA-binding protein-associated factor 2N	TAF15;FUS	2.224	3741600	1	21.6618	21.8701	24.2369	21.907	21.5134	21.8664
0.27521	-0.397901	H0YCU9;Q01995	H0YCU9;Q01995	Transgelin	TAGLN	2.5499	9191000	4	22.0679	22.6103	22.2981	22.9784	21.0733	21.7309
0.24234	0.298958	X6RJP6;P37802;P37802-2	X6RJP6;P37802;P37802-2	Transgelin-2	TAGLN2	20.232	31412000	15	21.3729	21.1041	22.5761	21.6297	22.2123	22.108
1.23239	0.710378	H7C5N2;C9J5W6;Q9UI15	H7C5N2;C9J5W6;Q9UI15	Transgelin-3	TAGLN3	10.984	15533000	9	21.7108	21.9555	22.449	22.5039	22.6881	23.0544
0.819509	-0.512393	F2Z393;P37837	F2Z393;P37837	Transaldolase	TALDO1	2.2651	45696000	4	22.699	22.0834	22.278	21.6505	22.2903	21.5824
1.36051	-1.75134	K7EJ99;A0A0A0MSV7;K7EJM5;A0A087WX29;A0A1W2PNU8;A0A0A0N0M3;K7EN94;B1AKP7;G3V162;A0A087X260;A0A087WYY0;Q13148	K7EJ99;A0A0A0MSV7;K7EJM5;A0A087WX29;A0A1W2PNU8;A0A0A0N0M3;K7EN94;B1AKP7;G3V162;A0A087X260;A0A087WYY0;Q13148	TAR DNA-binding protein 43	TARDBP;TDP43	4.3525	29123000	11	23.3191	23.4233	24.1678	22.8179	20.9513	21.887
1.24712	1.63472	P17987;F5H726;F5H676;F5H136;F5H282;E7EQR6;E7ERF2	P17987;F5H726;F5H676;F5H136;F5H282;E7EQR6;E7ERF2	T-complex protein 1 subunit alpha	TCP1	2.975	12538000	8	21.1875	20.5885	21.3205	22.5549	23.7101	21.7356
1.60307	0.687692	P02787;H7C5E8;F8WCI6;C9JB55;F8WEK9;C9JVG0;F8WC57;CON__Q2HJF0	P02787	Serotransferrin	TF	323.31	528070000000	1661	35.6206	35.7959	35.7508	36.7448	36.089	36.3965
0.638509	-0.374137	Q15582;H0Y8L3;S4R3C6;H0Y9D7;H0YAB8;H0Y8M8;D6RBX4;H0YAH8	Q15582;H0Y8L3	Transforming growth factor-beta-induced protein ig-h3	TGFBI	323.31	850580000	129	27.3787	26.7004	26.6353	26.7587	26.3829	26.4503
0.240599	0.272411	Q03167-2;Q03167	Q03167-2;Q03167	Transforming growth factor beta receptor type 3	TGFBR3	3.312	11549000	5	21.4801	22.1809	21.4127	22.7087	21.5693	21.613
0.342578	-1.17347	Q5H9A7;P01033;H0Y789;Q5H9B5;Q5H9B4	Q5H9A7;P01033;H0Y789	Metalloproteinase inhibitor 1	TIMP1	64.366	438590000	37	25.9842	25.868	25.5389	21.8009	26.0766	25.9932
1.35858	0.892342	P16035;B4DFW2;K7EIX4;K7EL90	P16035;B4DFW2	Metalloproteinase inhibitor 2	TIMP2	94.956	380090000	32	24.4958	25.2085	24.948	26.1414	25.3645	25.8235
0.645391	0.600914	P29401;P29401-2;A0A0B4J1R6;E9PFF2;F8W888;F8WAX4	P29401;P29401-2;A0A0B4J1R6;E9PFF2	Transketolase	TKT	81.06	208870000	47	24.5854	24.5747	24.2364	24.5486	24.7867	25.864
0.0440288	0.0709941	Q9Y490	Q9Y490	Talin-1	TLN1	2.4307	0	1	21.2025	21.931	22.7089	21.3667	22.1936	22.495
0.321912	0.629741	I3L0A0;Q13404-8;Q15819;Q13404;Q13404-7;Q13404-2;Q13404-1;E5RIF1;D6RG00;H0YBX6;G3V2F7;G3V113;A0A0A0MSL3;H0YBP9;Q13404-6	I3L0A0;Q13404-8;Q15819;Q13404;Q13404-7;Q13404-2;Q13404-1;E5RIF1;D6RG00;H0YBX6;G3V2F7;G3V113	Ubiquitin-conjugating enzyme E2 variant 1;Ubiquitin-conjugating enzyme E2 variant 2	TMEM189-UBE2V1;UBE2V1;UBE2V2	23.782	45214000	12	21.3312	23.2938	21.5962	22.3116	22.0727	23.726
0.594814	1.19665	G5E972;P42167-3;P42167-2;P42167;P42166;H0YJH7	G5E972;P42167-3;P42167-2;P42167;P42166	Lamina-associated polypeptide 2, isoforms beta/gamma;Thymopoietin;Thymopentin;Lamina-associated polypeptide 2, isoform alpha;Thymopoietin;Thymopentin	TMPO	10.091	81423000	21	21.0454	23.3324	23.5112	23.2773	23.5431	24.6586
0.157652	0.138137	P63313	P63313	Thymosin beta-10	TMSB10	1.9136	21300000	7	21.918	22.4038	22.6112	22.4355	22.8995	22.0125
0.017005	-0.0378227	P62328	P62328	Thymosin beta-4;Hematopoietic system regulatory peptide	TMSB4X	11.345	197780000	9	20.8196	22.1628	23.1939	21.5147	22.1131	22.435
0.494921	-1.02402	E9PC84;P24821-4;P24821;F5H7V9;J3QSU6;P24821-6;P24821-5;P24821-2;P24821-3;H0YGZ3	E9PC84;P24821-4;P24821;F5H7V9;J3QSU6;P24821-6;P24821-5;P24821-2;P24821-3;H0YGZ3	Tenascin	TNC	10.362	35505000	8	23.3983	23.3768	21.4206	21.662	20.6572	22.8044
0.768211	0.664234	P60174-1;P60174;P60174-4;U3KQF3;U3KPZ0;U3KPS5	P60174-1;P60174;P60174-4	Triosephosphate isomerase	TPI1	203.61	1591000000	104	26.8174	27.5617	27.6888	27.8824	27.5996	28.5786
0.230461	0.222779	Q9BW30	Q9BW30	Tubulin polymerization-promoting protein family member 3	TPPP3	15.929	2470900	2	21.928	22.6642	22.5118	23.1779	22.4433	22.1511
0.385711	-0.700239	Q5W0H4;A0A0B4J2C3;P13693;J3KPG2;E9PJF7;P13693-2;Q56UQ5	Q5W0H4;A0A0B4J2C3;P13693	Translationally-controlled tumor protein	TPT1	4.7615	50139000	6	21.9113	23.5781	23.6937	21.675	23.3401	22.0672
0.913717	-4.45192	H7BXY6;Q8NG11	H7BXY6;Q8NG11	Tetraspanin;Tetraspanin-14	TSPAN14	1.9977	3703100000	16	27.0972	28.8707	30.5018	22.1919	28.4716	22.4504
0.497658	-0.785212	Q9H2G4	Q9H2G4	Testis-specific Y-encoded-like protein 2	TSPYL2	15.888	136290000	9	22.271	22.9672	22.4517	21.5639	23.007	20.7634
1.94317	4.11475	P02766;A0A087WT59;A0A087WV45	P02766;A0A087WT59;A0A087WV45	Transthyretin	TTR	323.31	44303000000	250	29.6762	28.4475	29.7458	34.9924	33.0115	32.2098
0.0736661	-0.0978082	Q71U36-2;Q71U36;P68363;F5H5D3;Q9BQE3;P68363-2;P0DPH8;P0DPH7;P68366-2;P68366;A0A1W2PQM2;P0DPH7-2;Q6PEY2;F8VQQ4;F8VVB9;C9J2C0;Q9NY65-2;Q9NY65;F8VRZ4;F8VS66;F8VX09;F8VWV9;V9GZ17;C9JEV8;C9JDS9;C9JQ00;C9JJQ8;F8VRK0;A6NHL2-2;A6NHL2;C9K0S6;C9JDL2;F8VXZ7;F8W0F6	Q71U36-2;Q71U36;P68363;F5H5D3;Q9BQE3;P68363-2;P0DPH8;P0DPH7;P68366-2;P68366;A0A1W2PQM2;P0DPH7-2;Q6PEY2	Tubulin alpha-1A chain;Tubulin alpha-1B chain;Tubulin alpha-1C chain;Tubulin alpha-4A chain;Tubulin alpha-3E chain	TUBA1A;TUBA1B;TUBA1C;TUBA4A;TUBA3E	187.67	1802000000	115	27.613	28.1599	27.5351	27.2561	28.5163	27.2422
0.621183	-0.565776	Q5JP53;P07437;Q5ST81	Q5JP53;P07437;Q5ST81	Tubulin beta chain	TUBB	160.27	537320000	34	25.648	26.6103	26.2066	25.2854	26.1886	25.2936
0.162972	-0.352035	Q9BVA1;Q13885	Q9BVA1;Q13885	Tubulin beta-2B chain;Tubulin beta-2A chain	TUBB2B;TUBB2A	4.214	77826000	11	23.6254	22.0561	21.7993	21.2432	21.9605	23.2211
0.207823	0.578119	Q13509;A0A0B4J269;Q13509-2;G3V5W4;G3V2R8;G3V3R4;G3V2N6;G3V2A3;G3V3J6;G3V3W7;CON__ENSEMBL:ENSBTAP00000025008;Q9H4B7	Q13509;A0A0B4J269;Q13509-2	Tubulin beta-3 chain	TUBB3	17.922	87290000	24	21.1484	23.1438	23.1746	21.3878	24.0211	23.7922
0.214096	-0.263561	P68371	P68371	Tubulin beta-4B chain	TUBB4B	125.68	1422600000	94	27.2535	27.7256	27.3572	26.3542	27.928	27.2634
0.390761	-0.497597	Q9BUF5;K7ESM5;K7ES63	Q9BUF5;K7ESM5	Tubulin beta-6 chain	TUBB6	5.0869	42010000	7	23.5349	22.3463	22.6886	22.2533	21.717	23.1066
0.554506	0.854417	Q3ZCM7;A0A075B736;Q5SQY0	Q3ZCM7;A0A075B736;Q5SQY0	Tubulin beta-8 chain	TUBB8	1.9427	3255500	2	22.3118	20.8197	22.7094	22.0882	23.3136	23.0023
0.153601	-0.300121	F8W1Q9;F8VS81;Q12792;Q12792-3	F8W1Q9;F8VS81;Q12792;Q12792-3	Twinfilin-1	TWF1	2.1962	769470	1	22.1433	21.7914	22.5486	22.5379	22.577	20.468
0.224371	-0.835611	P10599;P10599-2	P10599;P10599-2	Thioredoxin	TXN	22.909	648890000	28	25.9338	26.4067	26.217	22.4804	26.4415	27.1287
1.12026	-0.59001	K7EJH3;A0A1B0GW87;K7EJM7;M0QYK5;M0R2N4;P0DN76;Q01081-3;Q8WU68-3;Q8WU68-2;Q8WU68;Q01081-2;Q01081	K7EJH3;A0A1B0GW87;K7EJM7;M0QYK5;M0R2N4;P0DN76;Q01081-3;Q8WU68-3;Q8WU68-2;Q8WU68;Q01081-2;Q01081	Splicing factor U2AF 35 kDa subunit;Splicing factor U2AF 26 kDa subunit	U2AF1L4;U2AF1	2.493	7408600	8	23.1153	22.4984	22.4624	22.0392	21.918	22.3489
0.0362819	0.066054	K7ENG2;P26368-2;P26368	K7ENG2;P26368-2;P26368	Splicing factor U2AF 65 kDa subunit	U2AF2	9.9619	69966000	25	22.2807	23.6363	23.1903	22.1656	23.492	23.6478
0.338882	-0.462834	P22314-2;P22314;Q5JRR6	P22314-2;P22314	Ubiquitin-like modifier-activating enzyme 1	UBA1	13.378	49478000	13	22.8056	22.5198	22.6377	21.5855	23.3068	21.6823
0.0158042	0.070708	J3QS39;J3QTR3;F5H6Q2;F5GYU3;F5H2Z3;F5H265;B4DV12;F5H388;F5H747;F5GXK7;J3QKN0;Q5PY61;Q96C32;P62987;P62979;P0CG47;P0CG48;M0R1V7;Q49A90;M0R1M6;M0R2S1;A0A2R8Y422;J3QSA3;F5GZ39	J3QS39;J3QTR3;F5H6Q2;F5GYU3;F5H2Z3;F5H265;B4DV12;F5H388;F5H747;F5GXK7;J3QKN0;Q5PY61;Q96C32;P62987;P62979;P0CG47;P0CG48;M0R1V7;Q49A90;M0R1M6;M0R2S1;A0A2R8Y422	Ubiquitin-60S ribosomal protein L40;Ubiquitin;60S ribosomal protein L40;Ubiquitin-40S ribosomal protein S27a;Ubiquitin;40S ribosomal protein S27a;Polyubiquitin-B;Ubiquitin;Polyubiquitin-C;Ubiquitin	UBB;RPS27A;UBC;UBA52	125.17	386850000	23	25.4022	26.474	22.1142	25.2797	23.3589	25.5639
0.0135958	0.0333939	P61086-2;P61086-3;P61086	P61086-2;P61086-3;P61086	Ubiquitin-conjugating enzyme E2 K	UBE2K	1.9501	0	1	21.4037	23.5163	22.3582	23.2542	22.6841	21.4402
0.253644	-0.372565	P68036;P68036-3;P68036-2;A0A1B0GUS4	P68036;P68036-3;P68036-2	Ubiquitin-conjugating enzyme E2 L3	UBE2L3	9.2466	73011000	6	21.5451	23.2741	22.9938	21.7894	22.5635	22.3423
0.204416	-0.29361	F8VQQ8;P61088;Q5JXB2	F8VQQ8;P61088;Q5JXB2	Ubiquitin-conjugating enzyme E2 N;Putative ubiquitin-conjugating enzyme E2 N-like	UBE2N;UBE2NL	3.1194	58443000	9	21.8951	22.8571	23.2384	21.6009	22.7642	22.7447
0.36042	-0.487166	X6REH9	X6REH9		UBE2W	1.8438	73404000	0	21.332	22.9644	22.5389	22.2258	21.2672	21.8808
1.35558	-0.678158	A0A087WTZ5;E9PJ81;E9PRQ7;Q04323;Q04323-2	A0A087WTZ5;E9PJ81;E9PRQ7;Q04323;Q04323-2	UBX domain-containing protein 1	UBXN1	213.72	3219400	8	22.5938	22.4448	22.9664	21.979	21.6929	22.2986
0.308743	0.498645	P09936;D6RE83;D6R956;D6R974;D6RF53	P09936;D6RE83;D6R956;D6R974	Ubiquitin carboxyl-terminal hydrolase isozyme L1;Ubiquitin carboxyl-terminal hydrolase	UCHL1	52.128	542290000	40	25.3065	26.0917	25.563	24.9436	26.5434	26.9702
1.80221	0.941444	P61960;H0Y614;P61960-2	P61960;H0Y614	Ubiquitin-fold modifier 1	UFM1	7.5345	45130000	6	21.9117	22.1527	21.4925	22.9658	22.8813	22.5342
0.55522	1.42328	Q9NYU2-2;Q9NYU2	Q9NYU2-2;Q9NYU2	UDP-glucose:glycoprotein glucosyltransferase 1	UGGT1	2.2642	2201700	2	21.5328	22.2135	18.9201	22.2617	23.2574	21.4172
0.398764	-0.631344	C9JWG0;C9JVG3;C9JQU9;C9JNZ1;A0A087WYS1;E7EUC7;Q16851-2;Q16851;F2Z3H1;C9JTZ5;C9JUW1	C9JWG0;C9JVG3;C9JQU9;C9JNZ1;A0A087WYS1;E7EUC7;Q16851-2;Q16851;F2Z3H1;C9JTZ5;C9JUW1	UTP--glucose-1-phosphate uridylyltransferase	UGP2	6.2471	11915000	5	23.1521	22.4605	23.0007	21.0884	22.3471	23.2838
0.0171405	0.0300032	M0QZZ6;M0QZE0;G8JLK1;Q9NZ43-3;Q9NZ43-2;Q9NZ43	M0QZZ6;M0QZE0;G8JLK1;Q9NZ43-3;Q9NZ43-2;Q9NZ43	Vesicle transport protein USE1	USE1	2.6594	0	2	22.2753	21.8522	22.575	21.1989	22.6228	22.9708
0.667966	-0.681215	Q9P0L0;Q9P0L0-2;E5RK64;O95292-2;O95292	Q9P0L0;Q9P0L0-2;E5RK64;O95292-2;O95292	Vesicle-associated membrane protein-associated protein A;Vesicle-associated membrane protein-associated protein B/C	VAPA;VAPB	4.5167	33647000	8	22.6948	21.4542	22.2886	20.9845	21.9672	21.4422
1.03113	-1.18219	Q6EMK4	Q6EMK4	Vasorin	VASN	2.0897	13442000	2	23.656	23.501	23.9828	21.6158	22.5635	23.4139
0.984847	-0.774911	P13611-2;P13611;E9PF17;P13611-4;P13611-3;P13611-5;D6RGZ6;Q86W61	P13611-2;P13611;E9PF17;P13611-4;P13611-3;P13611-5;D6RGZ6;Q86W61	Versican core protein	VCAN	98.663	898360000	73	27.3622	27.0091	26.8017	25.7445	26.8844	26.2194
0.156908	0.352358	P18206-2;P18206;A0A096LPE1;P18206-3	P18206-2;P18206	Vinculin	VCL	13.132	51239000	13	22.0558	22.7637	22.6782	21.4054	22.9389	24.2105
0.0626409	-0.198254	P55072;C9JUP7;C9IZA5	P55072	Transitional endoplasmic reticulum ATPase	VCP	38.347	167880000	45	23.9952	24.5815	23.8756	22.0545	24.0167	25.7863
0.255203	-0.333488	P08670;B0YJC4;B0YJC5;A0A1B0GTT5;P17661;H7C5W5;E7EMV2;E7ESP9;P41219;P41219-2;Q16352;P07197-2;P07197;A0A1B0GVG8;F8W835;P07196;P12036-2;P12036	P08670;B0YJC4	Vimentin	VIM	129.46	977930000	68	26.9676	27.628	26.4717	26.4089	26.186	27.472
0.533777	-0.553291	P23381-2;P23381;H0YJP3;G3V3H8;G3V3Y5;G3V277	P23381-2;P23381;H0YJP3	Tryptophan--tRNA ligase, cytoplasmic;T1-TrpRS;T2-TrpRS	WARS	10.359	48404000	15	23.6046	22.2811	22.4666	22.5348	21.8703	22.2872
0.197187	0.432632	O14980;C9JKM9;H7BZC5;C9IZS4;C9JQ02;C9JV99;C9J673	O14980;C9JKM9	Exportin-1	XPO1	4.5695	4493600	4	22.3542	20.2742	21.5574	20.6638	22.2794	22.5405
1.08671	0.705757	P13010;C9JZ81	P13010;C9JZ81	X-ray repair cross-complementing protein 5	XRCC5	19.122	9905400	10	21.3347	21.8524	22.0071	22.0211	22.806	22.4843
0.0377338	-0.038737	B1AHC9;P12956;P12956-2	B1AHC9;P12956;P12956-2	X-ray repair cross-complementing protein 6	XRCC6	10.483	15242000	12	21.8923	23.0873	22.4345	22.3519	22.4435	22.5026
0.0670913	0.16436	H0Y449;P67809;A0A0D9SEI8;P16989-2;P16989-3;P16989;C9J5V9;Q9Y2T7	H0Y449;P67809;A0A0D9SEI8;P16989-2;P16989-3;P16989	Nuclease-sensitive element-binding protein 1;Y-box-binding protein 3	YBX1;YBX3	53.216	63705000	17	22.5152	24.08	23.875	22.2849	24.0923	24.5861
1.19759	0.791835	P31946-2;P31946;Q4VY20;Q4VY19;A0A0J9YWE8;A0A0J9YWZ2	P31946-2;P31946	14-3-3 protein beta/alpha;14-3-3 protein beta/alpha, N-terminally processed	YWHAB	89.506	214760000	46	24.1133	24.8254	23.8875	25.0527	24.8509	25.2981
0.489448	0.730797	P62258;P62258-2;K7EIT4;B4DJF2;I3L3T1;K7EM20;I3L0W5	P62258;P62258-2	14-3-3 protein epsilon	YWHAE	323.31	2628900000	154	27.4567	28.4659	27.7772	27.7268	28.4581	29.7072
0.277105	0.460135	P61981;P31947-2;P31947	P61981	14-3-3 protein gamma;14-3-3 protein gamma, N-terminally processed	YWHAG	146.38	326940000	43	24.9401	25.8656	24.4705	24.9713	25.0822	26.6031
0.00150122	-0.0016861	Q04917;A2IDB2	Q04917;A2IDB2	14-3-3 protein eta	YWHAH	9.5538	50101000	19	22.3151	23.0154	22.6161	22.115	22.6545	23.1722
0.274351	0.402743	P27348;E9PG15	P27348;E9PG15	14-3-3 protein theta	YWHAQ	323.31	472620000	60	24.8539	26.2815	25.2891	25.1355	25.9447	26.5526
1.10364	1.03497	P63104;E7EX29;B0AZS6;P63104-2;B7Z2E6;H0YB80;E7ESK7;E5RIR4;E9PD24;E7EVZ2;E5RGE1	P63104;E7EX29;B0AZS6;P63104-2;B7Z2E6;H0YB80	14-3-3 protein zeta/delta	YWHAZ	323.31	2420500000	95	27.3875	28.1296	27.9177	28.3922	28.5424	29.6051
0.118656	-0.155501	Q4KWH8-2	Q4KWH8-2			2.6954	0	3	22.4984	22.5379	22.1993	21.3394	22.8516	22.5781
0.233957	0.55578	Q96MC5-2	Q96MC5-2			1.771	35909000	9	21.7505	21.9102	21.9716	21.0986	24.2245	21.9766

## Sheet: E370K vs Y366Lfs
Significance	Difference	Protein IDs	Majority protein IDs	Protein names	Gene names	Score	Intensity	MS/MS count	Y366Lfs_1	Y366Lfs_2	Y366Lfs_3	E370K_1	E370K_2	E370K_3
0.791633	1.44633	P01023;H0YFH1;P20742-2;P20742	P01023	Alpha-2-macroglobulin	A2M	165.04	170520000	60	21.6241	24.4355	23.6966	24.7736	24.739	24.5825
0.34343	0.465799	P49588;P49588-2;H3BPK7	P49588;P49588-2;H3BPK7	Alanine--tRNA ligase, cytoplasmic	AARS	2.4912	11090000	3	22.5095	22.0524	22.2007	21.64	23.1298	23.3902
0.414909	-0.388189	Q9BWD1;Q9BWD1-2	Q9BWD1;Q9BWD1-2	Acetyl-CoA acetyltransferase, cytosolic	ACAT2	33.123	84682000	31	23.6013	23.4148	24.62	23.7197	23.4989	23.2529
0.200267	-0.529837	G5E9R5;P24666-4;P24666;F2Z2Q9;D3YTI2;P24666-3;P24666-2	G5E9R5;P24666-4;P24666;F2Z2Q9;D3YTI2;P24666-3;P24666-2	Low molecular weight phosphotyrosine protein phosphatase	ACP1	4.5674	6224500	8	21.7524	22.8235	22.3755	23.4382	21.8462	20.0774
0.0772456	-0.452304	P68133;P68032;P63267;P62736;A6NL76;F8WB63;B8ZZJ2;C9JFL5;F6UVQ4;F6QUT6	P68133;P68032;P63267;P62736;A6NL76	Actin, alpha skeletal muscle;Actin, alpha cardiac muscle 1;Actin, gamma-enteric smooth muscle;Actin, aortic smooth muscle	ACTA1;ACTC1;ACTG2;ACTA2	18.088	756190000	14	22.7806	28.1903	25.3886	25.8237	22.3715	26.8073
0.208357	-0.189798	P60709;A0A2R8Y793;P63267-2;Q6S8J3;A0A2R8YEA7;E7EVS6;A0A2R8YGF8;A5A3E0;G5E9R0;Q562R1;A0A2R8YFE2;C9JUM1;C9JZR7;Q9BYX7;P0CG38;C9JTX5;P0CG39;F8WCH0	P60709;A0A2R8Y793	Actin, cytoplasmic 1;Actin, cytoplasmic 1, N-terminally processed	ACTB	29.696	64633000	10	22.2849	22.8579	22.3368	21.7054	22.6681	22.5368
0.262301	0.226816	P63261;I3L3I0;I3L1U9;I3L4N8;I3L3R2;K7EM38;J3KT65	P63261;I3L3I0;I3L1U9;I3L4N8	Actin, cytoplasmic 2;Actin, cytoplasmic 2, N-terminally processed	ACTG1	323.31	6375200000	209	28.9979	29.8172	29.4495	29.929	29.8676	29.1485
0.227944	-0.567434	H9KV75;P12814-2;P12814;P12814-3;P12814-4;G3V2W4;G3V2N5;P35609-2;P35609;F6THM6;G3V2E8;G3V5M4;G3V2X9;A0A087WSZ2;Q08043	H9KV75;P12814-2;P12814;P12814-3;P12814-4;G3V2W4	Alpha-actinin-1	ACTN1	2.5941	2539800	1	23.3236	21.0054	22.1908	20.5449	21.3232	22.9495
0.0717341	-0.146751	O43707;O43707-2;F5GXS2;O43707-3;H7C144;K7EJH8;H0YJ11;H0YJW3;H7C5W8;K7EP19;M0QZQ3;C9JY79;Q9H254-2;Q9H254-4;Q9H254	O43707;O43707-2	Alpha-actinin-4	ACTN4	56.941	203660000	57	24.3972	24.0121	26.1193	25.0703	24.9294	24.0887
0.189076	-0.422468	B4DXW1;P61158;F8WDR7;A0A0A0MTI9;H7C4J1;C9IZN3;Q9C0K3;Q9P1U1-2;Q9P1U1-3;Q9P1U1	B4DXW1;P61158;F8WDR7;A0A0A0MTI9;H7C4J1;C9IZN3;Q9C0K3;Q9P1U1-2;Q9P1U1-3;Q9P1U1	Actin-related protein 3;Actin-related protein 3C;Actin-related protein 3B	ACTR3;ACTR3C;ACTR3B	3.3983	13444000	2	22.442	22.4778	22.0694	21.4152	20.7537	23.5529
0.198221	-0.629272	G3V3F8;G3V597;P07311-2;P07311	G3V3F8;G3V597;P07311-2;P07311	Acylphosphatase-1	ACYP1	4.4187	3859200	6	22.5394	21.8317	20.9172	22.4391	22.0727	18.8886
0.658709	-0.609705	C9J6H5;C9JPM3;F8WC54;A0AVL1;Q13443-2;Q13443	C9J6H5;C9JPM3;F8WC54;A0AVL1;Q13443-2;Q13443	Disintegrin and metalloproteinase domain-containing protein 9	ADAM9	4.4522	30634000	6	22.4969	22.804	23.8353	22.6404	22.3963	22.2704
0.330355	0.266079	Q9UHI8	Q9UHI8	A disintegrin and metalloproteinase with thrombospondin motifs 1	ADAMTS1	31.056	27083000	5	22.6744	22.8357	22.1975	23.3001	22.8433	22.3624
0.0808583	-0.157546	Q8IUX7-2;Q8IUX7	Q8IUX7-2;Q8IUX7	Adipocyte enhancer-binding protein 1	AEBP1	9.1468	9622800	8	23.2577	21.011	22.6097	22.4554	21.8965	22.0539
1.06761	2.85877	J3KMX3;P02771;CON__Q3SZ57	J3KMX3;P02771	Alpha-fetoprotein	AFP	323.31	25597000000	376	27.8141	31.8881	28.5587	32.4342	32.367	32.0359
0.626891	0.741538	O00468-6;O00468-3;O00468-5;O00468-4;O00468-7;O00468;A0A087X208;O00468-2;H0Y5U1	O00468-6;O00468-3;O00468-5;O00468-4;O00468-7;O00468;A0A087X208;O00468-2	Agrin;Agrin N-terminal 110 kDa subunit;Agrin C-terminal 110 kDa subunit;Agrin C-terminal 90 kDa fragment;Agrin C-terminal 22 kDa fragment	AGRN	27.614	43490000	19	21.4009	23.0014	22.0393	23.3184	22.9246	22.4233
0.120479	0.157365	P23526-2;P23526	P23526-2;P23526	Adenosylhomocysteinase	AHCY	48.654	195330000	31	24.7609	23.9608	25.3346	25.3242	24.4259	24.7782
0.577652	0.608993	Q09666	Q09666	Neuroblast differentiation-associated protein AHNAK	AHNAK	4.7624	73744000	11	22.8882	23.0295	24.3429	24.1332	23.8771	24.0772
0.816709	2.08701	C9JV77;P02765	C9JV77;P02765	Alpha-2-HS-glycoprotein;Alpha-2-HS-glycoprotein chain A;Alpha-2-HS-glycoprotein chain B	AHSG	18.664	212770000	18	21.2231	25.2968	23.3329	25.1883	25.3085	25.6171
0.108924	-0.509448	H0YID2;Q5T9B7;P00568	H0YID2;Q5T9B7;P00568	Adenylate kinase isoenzyme 1	AK1	2.2382	4179400	1	20.106	23.0569	23.1632	21.315	24.0873	19.3955
0.051017	0.102913	P14550;V9GYG2;V9GYP9;Q5T621	P14550;V9GYG2;V9GYP9;Q5T621	Alcohol dehydrogenase [NADP(+)]	AKR1A1	2.6103	21591000	2	22.7722	22.0903	20.7913	21.527	21.6983	22.7372
0.179542	-0.347956	E9PCX2;P15121	E9PCX2;P15121	Aldose reductase	AKR1B1	4.6357	26665000	6	23.497	21.6105	22.7939	21.3343	22.5595	22.9638
0.0344992	-0.0609175	P04075;P04075-2;J3KPS3;H3BQN4;H3BPS8;H3BR68;H3BUH7;H3BR04;H3BU78;H3BMQ8;A0A087WXX2;A0A3B3IS80;P05062	P04075;P04075-2;J3KPS3;H3BQN4;H3BPS8	Fructose-bisphosphate aldolase A;Fructose-bisphosphate aldolase	ALDOA	156.21	753780000	104	26.0617	26.211	27.8612	26.5446	26.9552	26.4514
0.417674	0.547805	P09972;A8MVZ9;K7EKH5;J3KSV6;J3QKP5;C9J8F3	P09972;A8MVZ9	Fructose-bisphosphate aldolase C;Fructose-bisphosphate aldolase	ALDOC	14.415	8379400	7	21.9058	21.2924	22.6356	23.1714	21.7815	22.5243
0.141233	-0.332348	E9PB61;Q86V81	E9PB61;Q86V81	THO complex subunit 4	ALYREF	2.0472	30185000	5	23.752	21.0597	22.3697	21.7933	22.8382	21.553
0.138844	0.267445	H0YN26;P39687;H7BZ09;O95626;O43423	H0YN26;P39687	Acidic leucine-rich nuclear phosphoprotein 32 family member A	ANP32A	18.989	206610000	14	23.3262	25.6167	25.0817	25.05	25.1671	24.6099
0.0806877	-0.124659	Q92688-2;Q92688	Q92688-2;Q92688	Acidic leucine-rich nuclear phosphoprotein 32 family member B	ANP32B	3.9594	14558000	4	22.5624	23.3716	21.6627	22.8722	22.1814	22.1692
0.128151	0.135742	P04083;Q5T3N1;Q5T3N0	P04083;Q5T3N1;Q5T3N0	Annexin A1;Annexin	ANXA1	43.501	94113000	19	22.762	22.0038	23.1567	22.8922	22.403	23.0346
0.495646	0.357957	P07355;P07355-2;H0YN42;H0YKS4;H0YMD0;H0YMU9;A6NMY6;H0YMM1;H0YM50;H0YKZ7;H0YLV6;H0YMT9;H0YKX9;H0YMW4;H0YKL9;H0YNP5;H0YKV8;H0YN28;H0YL33;H0YN52;H0YMD9;H0YNA0;H0YLE2;H0YNB8;H0YKN4	P07355;P07355-2;H0YN42;H0YKS4;H0YMD0;H0YMU9;A6NMY6;H0YMM1;H0YM50;H0YKZ7;H0YLV6;H0YMT9;H0YKX9;H0YMW4	Annexin A2;Annexin;Putative annexin A2-like protein	ANXA2;ANXA2P2	91.478	630850000	58	25.5404	26.1268	26.6291	26.4927	26.4391	26.4382
0.165657	0.544392	P08758;D6RBE9;D6RBL5;E9PHT9	P08758;D6RBE9;D6RBL5	Annexin A5;Annexin	ANXA5	96.336	145450000	23	20.7875	24.0914	24.669	23.786	24.1563	23.2388
0.371863	-0.514868	E5RK69;P08133-2;P08133;E7EMC6;H0YC77;E5RFF0	E5RK69;P08133-2;P08133;E7EMC6	Annexin;Annexin A6	ANXA6	8.1498	30271000	12	23.4478	21.9614	21.836	22.353	21.4478	21.8998
0.233818	0.304475	F5GZ08;B7Z4G8;P51693;P51693-2;S4R3U6;K7EQJ4;K7ELK0;K7EMN4	F5GZ08;B7Z4G8;P51693;P51693-2;S4R3U6;K7EQJ4	Amyloid-like protein 1;C30	APLP1	50.069	55760000	18	22.3414	23.4415	24.0346	23.7684	23.6194	23.3431
1.44083	4.59354	P02647;F8W696	P02647;F8W696	Apolipoprotein A-I;Proapolipoprotein A-I;Truncated apolipoprotein A-I	APOA1	323.31	3849100000	105	22.8087	27.766	24.14	29.4715	29.5895	29.4343
0.16409	0.236028	Q8NCW5-2;Q8NCW5;Q5T3I4;Q5T3I3	Q8NCW5-2;Q8NCW5;Q5T3I4;Q5T3I3	NAD(P)H-hydrate epimerase	APOA1BP	2.4768	3862800	4	21.9627	22.9791	21.2165	21.9469	22.3659	22.5536
0.195203	0.405402	V9GYM3;P02652;V9GYE3;V9GYG9;V9GYC1;V9GYS1	V9GYM3;P02652;V9GYE3;V9GYG9	Apolipoprotein A-II;Proapolipoprotein A-II;Truncated apolipoprotein A-II	APOA2	113.6	34404000	11	22.1894	22.7214	21.8964	22.4169	21.5059	24.1007
1.68492	1.95427	P06727;CON__Q32PJ2	P06727	Apolipoprotein A-IV	APOA4	29.063	185810000	26	23.9469	23.6941	22.4609	24.8499	25.7405	25.3742
0.00283591	0.00574366	P04114;A8MUN2	P04114	Apolipoprotein B-100;Apolipoprotein B-48	APOB	38.422	9635200	9	23.0317	22.291	21.8444	21.3593	23.3002	22.5249
0.0997581	-0.194948	B0YIW2;P02656	B0YIW2;P02656	Apolipoprotein C-III	APOC3	127.45	11982000	5	21.6607	22.823	22.5853	23.2032	22.1733	21.1077
3.08695	3.506	P02649;E9PEV4;E7ERP7;H0Y7L5;CON__Q03247	P02649;E9PEV4;E7ERP7;H0Y7L5	Apolipoprotein E	APOE	193.47	265280000	22	21.9473	21.7518	22.5871	25.9561	25.8276	25.0205
0.492071	0.153823	P05067-11;P05067-8;P05067;P05067-7;P05067-9;E9PG40;H7C0V9	P05067-11;P05067-8;P05067;P05067-7;P05067-9;E9PG40;H7C0V9	Amyloid beta A4 protein;N-APP;Soluble APP-alpha;Soluble APP-beta;C99;Beta-amyloid protein 42;Beta-amyloid protein 40;C83;P3(42);P3(40);C80;Gamma-secretase C-terminal fragment 59;Gamma-secretase C-terminal fragment 57;Gamma-secretase C-terminal fragment 50;C31	APP	151.01	1198500000	146	27.5006	27.154	27.4757	27.6237	27.5928	27.3753
0.0707481	0.219667	F5H423;P84077;P61204;F5H0C7;P61204-2	F5H423;P84077;P61204;F5H0C7;P61204-2	ADP-ribosylation factor 1;ADP-ribosylation factor 3	ARF1;ARF3	22.267	50697000	13	20.7537	23.8338	22.6304	23.7818	21.6861	22.4091
0.0131325	-0.0162042	J3KRE2;J3KTF8;J3QQX2;P52565	J3KRE2;J3KTF8;J3QQX2;P52565	Rho GDP-dissociation inhibitor 1	ARHGDIA	3.5863	21652000	5	22.7144	21.5859	21.9444	21.7255	22.5181	21.9525
0.0785079	0.104564	P25705-2;P25705;P25705-3;K7EK77;K7EJP1;K7ERX7;K7EQH4;K7ENJ4	P25705-2;P25705;P25705-3;K7EK77;K7EJP1;K7ERX7	ATP synthase subunit alpha, mitochondrial	ATP5A1	11.656	31001000	13	22.824	21.2843	21.8634	22.0528	22.3502	21.8823
0.0402622	0.0919304	P06576;F8W079;H0YH81;H0YI37;F8W0P7	P06576;F8W079;H0YH81	ATP synthase subunit beta, mitochondrial;ATP synthase subunit beta	ATP5B	59.048	44086000	14	22.8043	23.3782	21.8015	23.9717	21.9023	22.3859
0.418998	-0.773361	A6QRJ1;Q15904;H7C2Y8;A6NLC6	A6QRJ1;Q15904;H7C2Y8;A6NLC6	V-type proton ATPase subunit S1	ATP6AP1	8.4508	14659000	9	22.4132	23.4545	23.9756	22.4341	23.6483	21.4408
0.158554	0.203609	B7Z1I9;A0A1B0GVB9;A0A1B0GVW0;A0A1C7CYW4;O75787-2;O75787;A0A1B0GWD6;A0A1B0GVI9;A0A1B0GVC7;A0A1B0GU12;B7Z413;A0A1B0GTU8;A0A1B0GUT7;A0A1B0GWJ8;H7C3E1;A0A1B0GTB0;A0A1B0GUV3;A0A1B0GV24;A0A1B0GW13;A0A1B0GV60	B7Z1I9;A0A1B0GVB9;A0A1B0GVW0;A0A1C7CYW4;O75787-2;O75787;A0A1B0GWD6;A0A1B0GVI9;A0A1B0GVC7;A0A1B0GU12;B7Z413;A0A1B0GTU8;A0A1B0GUT7;A0A1B0GWJ8;H7C3E1;A0A1B0GTB0	Renin receptor	ATP6AP2	9.7996	43502000	23	22.8203	21.8783	23.3757	23.2477	22.5478	22.8897
0.21338	0.145739	P61769;H0YLF3;F5H6I0	P61769;H0YLF3;F5H6I0	Beta-2-microglobulin;Beta-2-microglobulin form pI 5.3	B2M	193.26	1679800000	67	27.7441	27.5006	26.9568	27.6545	27.6913	27.293
0.140484	-0.24677	P15291-2;P15291	P15291-2;P15291	Beta-1,4-galactosyltransferase 1;Lactose synthase A protein;N-acetyllactosamine synthase;Beta-N-acetylglucosaminylglycopeptide beta-1,4-galactosyltransferase;Beta-N-acetylglucosaminyl-glycolipid beta-1,4-galactosyltransferase;Processed beta-1,4-galactosyltransferase 1	B4GALT1	4.8877	57504000	7	22.371	23.9388	22.4422	22.4001	22.15	23.4615
0.251101	-0.379216	O43505	O43505	Beta-1,4-glucuronyltransferase 1	B4GAT1	18.689	64750000	20	23.9199	24.157	22.4544	22.6087	23.5352	23.2498
0.136317	-0.276676	P80723;P80723-2	P80723;P80723-2	Brain acid soluble protein 1	BASP1	156.55	122840000	46	24.0354	23.6494	25.877	24.4768	24.6028	23.6522
1.34048	-2.3697	P00918;E5RID5;E5RK37	P00918	Carbonic anhydrase 2	CA2	35.425	112720000	16	26.1366	23.9027	25.9836	22.3704	23.744	22.7994
0.867678	-0.726376	Q9HB71-3;Q9HB71	Q9HB71-3;Q9HB71	Calcyclin-binding protein	CACYBP	3.2847	9842300	3	22.1158	22.1042	22.2736	20.7688	22.1047	21.441
0.441262	-0.319979	F8WBR5;M0QZ52;G3V479;P0DP25;P0DP24;P0DP23;H0Y7A7;E7ETZ0;E7EMB3;P27482;C9J7T9;P02585	F8WBR5;M0QZ52;G3V479;P0DP25;P0DP24;P0DP23;H0Y7A7;E7ETZ0;E7EMB3;P27482	Calmodulin-like protein 3	CALM2;CALM3;CALM1;CALML3	18.125	55287000	14	23.1233	23.1946	23.7622	22.621	23.4401	23.059
0.333842	0.265591	P27797;K7EJB9;K7EL50	P27797;K7EJB9	Calreticulin	CALR	89.334	285030000	47	24.4061	25.2083	24.7181	24.5983	25.1605	25.3704
0.474309	-0.528602	O43852;O43852-3;O43852-2;O43852-4;H0Y875;O43852-15;O43852-10;O43852-6;O43852-9;O43852-5;O43852-13;O43852-14;O43852-11;O43852-12;O43852-7;O43852-8	O43852;O43852-3;O43852-2;O43852-4;H0Y875;O43852-15;O43852-10;O43852-6;O43852-9;O43852-5	Calumenin	CALU	32.991	84312000	22	24.3404	23.3685	24.2823	23.6749	23.9748	22.7557
0.0558077	0.200633	Q86VP6;Q86VP6-2;A0A0C4DGH5;H0YH27;Q86VP6-3	Q86VP6;Q86VP6-2;A0A0C4DGH5	Cullin-associated NEDD8-dissociated protein 1	CAND1	21.754	113330000	33	21.6059	24.7493	25.5748	24.4496	24.465	23.6174
0.226949	-0.434654	Q5T0R7;Q5T0R6;Q5T0R5;Q5T0R4;Q5T0R3;Q5T0R2;Q5T0R1;Q01518;Q5T0R9;Q01518-2	Q5T0R7;Q5T0R6;Q5T0R5;Q5T0R4;Q5T0R3;Q5T0R2;Q5T0R1;Q01518;Q5T0R9;Q01518-2	Adenylyl cyclase-associated protein;Adenylyl cyclase-associated protein 1	CAP1	6.6797	27362000	4	21.2256	23.6064	23.0438	22.1575	21.8393	22.5752
0.0591292	-0.0619907	P52907	P52907	F-actin-capping protein subunit alpha-1	CAPZA1	11.685	28612000	15	22.0071	22.2866	22.8273	21.7775	22.6659	22.4915
0.8263	0.943347	P47755;C9JUG7;F8W9N7;A0A0D9SET8;P47755-2	P47755;C9JUG7;F8W9N7;A0A0D9SET8;P47755-2	F-actin-capping protein subunit alpha-2	CAPZA2	3.4344	31694000	6	21.639	21.8595	23.1108	22.7382	23.0594	23.6417
0.290979	0.658609	B1AK85;P47756-2;P47756;B1AK87;B1AK88	B1AK85;P47756-2;P47756;B1AK87;B1AK88	F-actin-capping protein subunit beta	CAPZB	8.1348	2516700	5	23.3739	21.4841	20.3681	22.6765	21.8768	22.6486
0.0287276	-0.0753581	Q9Y2V2;H3BSW7;H3BUY4;H3BPY5;H3BNU9	Q9Y2V2;H3BSW7;H3BUY4;H3BPY5;H3BNU9	Calcium-regulated heat stable protein 1	CARHSP1	2.3606	7905100	3	23.1068	22.2015	23.1285	24.3891	21.979	21.8426
0.104376	-0.0644887	P04040	P04040	Catalase	CAT	18.224	126900000	28	24.1871	23.5511	23.9519	23.912	23.9933	23.5914
0.0420861	0.124384	B5MD17;J3KS05;P83916;K7ELA4;C9JWS9;Q13185	B5MD17;J3KS05;P83916;K7ELA4	Chromobox protein homolog 1	CBX1	20.615	75124000	11	21.6524	23.7854	24.2204	23.9171	24.0089	22.1053
0.0494052	-0.0381775	P45973;F8VNY3	P45973;F8VNY3	Chromobox protein homolog 5	CBX5	18.28	12345000	7	22.069	22.6358	22.4087	22.0671	22.1893	22.7425
0.0263425	0.0278905	A0A0A6YYA4;Q96M83	A0A0A6YYA4;Q96M83	Coiled-coil domain-containing protein 7	CCDC7	4.6027	53831000	4	22.3421	22.6131	22.0687	21.9167	22.2077	22.9832
0.22138	0.511852	F8VQ14;F5GWF6;P78371	F8VQ14;F5GWF6;P78371	T-complex protein 1 subunit beta	CCT2	12.706	18149000	10	21.6877	22.2347	21.8852	23.2028	23.4613	20.679
0.0994209	-0.298852	B4DUR8;P49368-2;P49368	B4DUR8;P49368-2;P49368	T-complex protein 1 subunit gamma	CCT3	3.2309	842410	2	22.8321	22.331	22.6337	20.1828	23.1099	23.6076
0.153133	-0.260585	P50991-2;P50991	P50991-2;P50991	T-complex protein 1 subunit delta	CCT4	14.627	14498000	11	22.619	21.7651	21.7634	22.8308	21.6599	20.8751
0.0619001	-0.116786	E7ENZ3;B7ZAR1;E9PCA1;P48643-2;P48643	E7ENZ3;B7ZAR1;E9PCA1;P48643-2;P48643	T-complex protein 1 subunit epsilon	CCT5	21.402	28517000	16	22.5764	23.0166	21.5127	22.9594	22.4582	21.3378
0.900546	0.664833	P40227;P40227-2	P40227;P40227-2	T-complex protein 1 subunit zeta	CCT6A	35.631	26111000	5	21.5695	22.162	21.9906	22.2076	22.3507	23.1584
0.240156	-0.597257	P50990-2;P50990;H7C4C8;P50990-3	P50990-2;P50990;H7C4C8;P50990-3	T-complex protein 1 subunit theta	CCT8	2.5376	3085800	2	21.2555	23.1239	22.7923	22.3254	20.2325	22.822
0.866705	-1.24876	K7EIU0;K7EQA9;Q16543	K7EIU0;K7EQA9;Q16543	Hsp90 co-chaperone Cdc37;Hsp90 co-chaperone Cdc37, N-terminally processed	CDC37	2.0231	6652200	3	21.5923	23.6821	22.792	21.9962	21.035	21.2889
0.215626	-0.315149	P60953;Q5JYX0;P60953-1	P60953;Q5JYX0;P60953-1	Cell division control protein 42 homolog	CDC42	3.1586	15522000	5	22.1259	23.6427	22.3024	21.8921	22.9413	22.2922
0.603845	1.48693	P55287-2;P55287;H3BUU9;H3BQH2;J3KTG8;J3QKW5;J3QLE6;F5H5X9;J3KRI5;X6R3Y6;Q9ULB5;P55286	P55287-2;P55287;H3BUU9	Cadherin-11	CDH11	258.26	222200000	52	22.871	24.7964	21.0725	23.9066	24.6482	24.6459
0.0808796	-0.118579	P19022;C9J8J8;P19022-2;C9JMH2;C9J126	P19022;C9J8J8;P19022-2	Cadherin-2	CDH2	12.195	397970000	42	25.121	26.3095	24.5921	25.1739	25.0768	25.4161
0.397561	-0.933619	P55283-2;P55283	P55283-2;P55283	Cadherin-4	CDH4	2.8209	4590800	1	21.715	22.995	21.9525	21.1302	22.9392	19.7921
0.715315	-0.394667	E7ETN3;B4E1Z4;P00751;H7C5H1;A0A0G2JH38;P00751-2	E7ETN3;B4E1Z4;P00751;H7C5H1;A0A0G2JH38	Complement factor B;Complement factor B Ba fragment;Complement factor B Bb fragment	CFB	73.162	54107000	19	23.2338	22.9286	23.0159	23.0153	22.7613	22.2176
0.553359	-0.344732	G3XAM2;E7ETH0;P05156;A0A2R8Y3M9;A0A087X0I2;D6R9Z8;CON__Q32PI4	G3XAM2;E7ETH0;P05156;A0A2R8Y3M9	Complement factor I;Complement factor I heavy chain;Complement factor I light chain	CFI	286.66	797210000	78	27.3532	26.7301	27.129	26.9386	26.9278	26.3116
0.0464322	0.0479946	P23528;G3V1A4;E9PP50;E9PK25;E9PQB7;E9PLJ3;E9PS23;Q9Y281-3;Q9Y281	P23528;G3V1A4;E9PP50;E9PK25;E9PQB7	Cofilin-1	CFL1	181.01	1133400000	80	26.5369	27.4694	27.3036	27.4305	27.2748	26.7486
0.302423	0.326311	P10645;G5E968	P10645;G5E968	Chromogranin-A;Vasostatin-1;Vasostatin-2;EA-92;ES-43;Pancreastatin;SS-18;WA-8;WE-14;LF-19;Catestatin;AL-11;GV-19;GR-44;ER-37;GE-25;Serpinin-RRG;Serpinin;p-Glu serpinin precursor	CHGA	2.3598	12196000	3	22.8514	21.7058	22.193	23.0435	22.6316	22.0539
0.0742514	0.193083	P05060;A0A0A0MT66	P05060;A0A0A0MT66	Secretogranin-1;PE-11;GAWK peptide;CCB peptide	CHGB	19.899	39369000	9	22.1143	22.8023	22.6928	21.0066	23.962	23.22
0.570775	1.4959	Q70JA7	Q70JA7	Chondroitin sulfate synthase 3	CHSY3	17.245	1840100	1	19.2632	23.0734	22.2613	22.7905	23.2255	23.0696
0.382253	0.994502	P12277;G3V4N7;H0YJG0;G3V461;G3V2I1;H0YJK0	P12277;G3V4N7	Creatine kinase B-type	CKB	173.88	658760000	62	24.1881	27.6791	24.6732	26.4251	26.6424	26.4565
1.07907	-0.672449	Q9Y240	Q9Y240	C-type lectin domain family 11 member A	CLEC11A	2.1952	14266000	3	22.5055	22.9871	22.5908	22.4681	21.5937	22.0042
1.44415	0.760119	O00299	O00299	Chloride intracellular channel protein 1	CLIC1	40.336	137610000	29	23.1365	23.7341	23.5244	24.5252	23.9334	24.2169
0.134171	-0.233518	Q9Y696	Q9Y696	Chloride intracellular channel protein 4	CLIC4	16.899	38388000	10	22.5104	21.4904	23.1892	22.5767	22.5684	21.3442
0.0838434	-0.0665938	O94985-2;O94985;Q5SR54;A0A3B3ITY6	O94985-2;O94985;Q5SR54	Calsyntenin-1;Soluble Alc-alpha;CTF1-alpha	CLSTN1	104.4	661580000	80	26.0855	26.9153	26.434	26.5774	26.1213	26.5362
1.18739	0.389844	Q9H4D0	Q9H4D0	Calsyntenin-2	CLSTN2	3.0196	11301000	4	21.9558	21.7188	22.066	22.085	22.4775	22.3476
0.00139247	0.00258636	Q9BQT9;Q9BQT9-2	Q9BQT9;Q9BQT9-2	Calsyntenin-3	CLSTN3	21.488	28710000	9	22.9685	23.434	21.4446	22.4633	22.6682	22.7235
0.47245	-0.463932	A0A087WVQ6;Q00610-2;Q00610;J3KS13;A0A087WX41;P53675-2;P53675;J3KRF5;K7EJJ5	A0A087WVQ6;Q00610-2;Q00610	Clathrin heavy chain;Clathrin heavy chain 1	CLTC	15.99	43078000	13	23.0164	23.7633	22.4462	22.9829	22.4851	22.3661
1.09382	-0.512192	P10909-4;P10909;P10909-5;P10909-2;P10909-3;H0YAS8;H0YC35;H0YLK8;E5RG36;E5RGB0;E5RH61;E5RJZ5;E7ERK6;E7ETB4	P10909-4;P10909;P10909-5;P10909-2;P10909-3;H0YAS8	Clusterin;Clusterin beta chain;Clusterin alpha chain	CLU	123.43	730320000	37	26.9274	26.8773	27.3686	26.8288	26.5141	26.2937
0.0263129	0.0856686	P30085-2;P30085	P30085-2;P30085	UMP-CMP kinase	CMPK1	6.5547	5628800	5	20.55	21.5412	22.3261	22.9382	19.7046	22.0314
0.0220739	0.0601858	Q96KP4-2;Q96KP4;J3KSS4;J3QRP4;J3QQN6;J3QR27;J3QLU1;J3QKQ0;J3QRD0;J3QRA8;J3QL02;J3KSV5;A0A087WYZ1;J3QKT2	Q96KP4-2;Q96KP4;J3KSS4;J3QRP4;J3QQN6;J3QR27;J3QLU1;J3QKQ0;J3QRD0;J3QRA8;J3QL02;J3KSV5;A0A087WYZ1;J3QKT2	Cytosolic non-specific dipeptidase	CNDP2	2.041	4695000	2	22.1196	22.5436	22.9459	23.8578	20.9073	23.0245
0.599818	1.08621	E9PDU6;Q15417-3;Q15417-2;Q15417	E9PDU6;Q15417-3;Q15417-2;Q15417	Calponin;Calponin-3	CNN3	5.3822	6247400	2	23.141	20.7655	20.963	22.6609	22.2523	23.2149
0.70077	-0.768862	Q5T8H6;P26992	Q5T8H6;P26992	Ciliary neurotrophic factor receptor subunit alpha	CNTFR	2.4382	10480000	5	22.1328	22.351	22.2906	22.3878	20.6757	21.4044
0.0977581	0.133666	A0A1W2PQ86;A0A1W2PQ11;Q02246;A0A1B0GTL7;A0A1W2PQJ4;A0A1W2PPQ9;A0A1W2PR60	A0A1W2PQ86;A0A1W2PQ11;Q02246;A0A1B0GTL7	Contactin-2	CNTN2	13.462	36081000	14	22.6257	23.5473	22.5094	22.3674	23.0948	23.6212
0.0510794	0.0671387	P12107-4;P12107-3;P12107;P12107-2;H7C381;C9JMN2;A0A2R8Y4M5;A0A2R8Y4I5;A0A2R8Y5N4;A0A2R8YDU3	P12107-4;P12107-3;P12107;P12107-2;H7C381;C9JMN2;A0A2R8Y4M5;A0A2R8Y4I5;A0A2R8Y5N4;A0A2R8YDU3	Collagen alpha-1(XI) chain	COL11A1	78.389	49786000	12	21.3983	22.2087	21.2123	22.2535	21.6652	21.1021
0.360965	0.293653	A0A087X0K0;P39059	A0A087X0K0;P39059	Collagen alpha-1(XV) chain;Restin;Restin-2;Restin-3;Restin-4	COL15A1	139.22	1293100000	93	27.0082	27.0625	26.0633	26.8149	27.1503	27.0497
0.200678	-0.658492	P39060-2;P39060-1;P39060;H7BXV5;H7C457	P39060-2;P39060-1;P39060;H7BXV5;H7C457	Collagen alpha-1(XVIII) chain;Endostatin	COL18A1	7.5982	8919300	9	25.4966	22.4215	21.3077	22.2548	22.2368	22.7588
0.0899622	0.190128	P02452;CON__Q862S4;I3L3H7	P02452	Collagen alpha-1(I) chain	COL1A1	323.31	8547000000	306	30.3072	29.5799	27.7904	29.3064	29.3675	29.5739
0.165512	0.242573	A0A087WTA8;P08123	A0A087WTA8;P08123	Collagen alpha-2(I) chain	COL1A2	323.31	11711000000	395	30.5005	30.2189	28.8384	29.9461	29.8432	30.4962
0.0523034	0.0973924	P02458-1;P02458	P02458-1;P02458	Collagen alpha-1(II) chain;Collagen alpha-1(II) chain;Chondrocalcin	COL2A1	3.4107	0	1	22.2001	23.1057	21.6401	22.6654	21.4885	23.0842
0.22223	0.34424	P02461;P02461-2;H7C435	P02461;P02461-2	Collagen alpha-1(III) chain	COL3A1	323.31	16751000000	472	30.9921	30.6264	29.0604	30.4733	30.4292	30.8092
0.749461	1.35391	A0A3B3ISV3;P02462	A0A3B3ISV3;P02462	Collagen alpha-1(IV) chain;Arresten	COL4A1	78.863	106320000	23	20.8082	23.4819	21.3791	23.5702	23.1297	23.0309
0.320471	1.04809	P08572;A0A3B3IS47;A0A3B3IRV2;A0A3B3IT80;A0A3B3ITQ8	P08572	Collagen alpha-2(IV) chain;Canstatin	COL4A2	17.421	185490000	23	21.6289	24.6275	21.5035	21.9113	24.3001	24.6928
0.163452	0.355983	P20908;P20908-2;H7BY82	P20908;P20908-2	Collagen alpha-1(V) chain	COL5A1	323.31	2629100000	181	28.7034	28.1205	26.1531	27.7139	27.7653	28.5658
0.625564	0.397499	P05997;A0A087WYX9;A0A3B3IRH9	P05997;A0A087WYX9	Collagen alpha-2(V) chain	COL5A2	323.31	1285800000	107	26.6891	26.9628	26.0453	26.8196	26.9459	27.1243
0.357583	0.259735	A0A087X0S5;P12109	A0A087X0S5;P12109	Collagen alpha-1(VI) chain	COL6A1	323.31	3529500000	219	28.709	28.6929	27.8035	28.6305	28.6045	28.7495
0.374062	0.421317	P12110;P12110-3;P12110-2;C9JH44;H7C0M5	P12110;P12110-3;P12110-2	Collagen alpha-2(VI) chain	COL6A2	177.98	476160000	43	25.5198	25.9545	24.4091	25.6964	25.5431	25.9077
1.10076	0.878066	P12111-2;P12111;E7ENL6;P12111-4;P12111-3;P12111-5;C9JNG9	P12111-2;P12111;E7ENL6;P12111-4	Collagen alpha-3(VI) chain	COL6A3	323.31	603490000	121	24.601	25.841	24.9786	26.0647	26.1233	25.8668
0.000397266	-0.000941594	M0QXB4;O14579-2;O14579	M0QXB4;O14579-2;O14579	Coatomer subunit epsilon	COPE	3.0262	2479500	1	21.8546	21.7885	21.5145	21.8661	20.325	22.9637
0.0371496	-0.154973	H0Y8X7;Q9Y678	H0Y8X7;Q9Y678	Coatomer subunit gamma-1	COPG1	2.4547	5005300	5	21.2286	22.3973	22.2691	22.6028	23.6758	19.1514
0.681996	-1.06599	F8VXB1;F8VUC5;F8W156;F8W651;F8VYZ4;F8VVA7;P61923-5;P61923	F8VXB1;F8VUC5;F8W156;F8W651;F8VYZ4;F8VVA7;P61923-5;P61923	Coatomer subunit zeta-1	COPZ1	2.1879	11081000	7	22.5593	22.3251	21.8274	21.6818	22.0022	19.8299
0.83842	-0.453573	Q9ULV4;Q9ULV4-2;Q9ULV4-3;B4E3S0;F8W1H8;F8VUX3;F8VSA4;F8VRE9;H0YHL7;F8VTT6;F8VVB7	Q9ULV4;Q9ULV4-2;Q9ULV4-3;B4E3S0	Coronin-1C;Coronin	CORO1C	1.9662	8405400	5	22.2967	22.6501	22.2436	22.0505	21.5268	22.2523
0.654844	0.574966	H3BT58;Q14019	H3BT58;Q14019	Coactosin-like protein	COTL1	74.599	77526000	18	23.0258	22.4132	22.7833	24.0255	22.9815	22.9401
0.25208	0.168718	P16870-2;P16870;D6RF88;C9JE88;D6R930;H0YAM0	P16870-2;P16870	Carboxypeptidase E	CPE	93.046	594490000	86	26.0372	26.4418	26.0345	25.9205	26.3927	26.7065
0.32949	1.43675	P29762;B5MCB5	P29762	Cellular retinoic acid-binding protein 1	CRABP1	145.66	544840000	44	21.3007	27.3	25.5311	26.3668	26.3925	25.6827
0.0206733	0.0481834	P29373;Q5SYZ4	P29373;Q5SYZ4	Cellular retinoic acid-binding protein 2	CRABP2	62.733	55009000	7	22.0836	23.0812	24.3269	24.0234	23.0371	22.5758
0.405652	-0.873586	P46109	P46109	Crk-like protein	CRKL	1.8231	2862000	2	23.4086	22.3309	23.0613	20.8362	23.7094	21.6345
0.451494	0.528604	E9PD68;Q14194;Q14194-2	E9PD68;Q14194;Q14194-2	Dihydropyrimidinase-related protein 1	CRMP1	3.4489	18987000	6	22.2521	21.7204	21.2691	22.4646	22.884	21.4787
0.408422	-1.34413	P55060-2;P55060-4;P55060-3;P55060	P55060-2;P55060-4;P55060-3;P55060	Exportin-2	CSE1L	7.6996	3566900	4	22.0312	21.7352	22.6284	22.4622	21.8328	18.0675
0.337919	-0.299153	P01034	P01034	Cystatin-C	CST3	65.464	938370000	35	26.9534	27.5389	26.4584	26.8336	26.9131	26.3065
0.176728	0.265333	A0A1W2PS52;P04080	A0A1W2PS52;P04080	Cystatin-B	CSTB	7.2503	63115000	9	22.4052	22.3224	22.624	23.8411	22.1452	22.1613
0.338215	-0.751001	E5RGG4;E5RJ43;E5RGS1;A0A087WZL6;E5RGU3;E5RHJ5;E5RFG3;E5RFK9;E5RFM5;E5RJP7;E5RGD2;G3XAM7;P35221-3;P35221;P35221-2	E5RGG4;E5RJ43;E5RGS1;A0A087WZL6;E5RGU3;E5RHJ5;E5RFG3;E5RFK9;E5RFM5;E5RJP7;E5RGD2;G3XAM7;P35221-3;P35221;P35221-2	Catenin alpha-1	CTNNA1	3.3638	4619600	3	22.3665	22.8483	22.2571	21.4067	20.3755	23.4367
0.400121	0.527931	P07858;R4GMQ5	P07858	Cathepsin B;Cathepsin B light chain;Cathepsin B heavy chain	CTSB	11.341	75519000	19	21.9288	23.4326	23.1132	22.8039	23.3411	23.9134
0.344148	0.466027	P07711	P07711	Cathepsin L1;Cathepsin L1 heavy chain;Cathepsin L1 light chain	CTSL	4.1108	38439000	9	21.1561	21.6397	22.6928	22.955	21.9535	21.9782
0.212782	0.180829	O60888-3;O60888;O60888-2;C9IZG4;C9IZQ5	O60888-3;O60888;O60888-2;C9IZG4	Protein CutA	CUTA	155.71	285380000	34	25.0547	24.9487	25.6371	25.395	24.9593	25.8286
0.387484	0.52566	C9JFR7;P99999	C9JFR7;P99999	Cytochrome c	CYCS	3.1094	4895300	3	22.4276	22.9399	21.3275	22.6564	22.266	23.3495
0.0581227	0.055596	Q14118;C9JYS1;C9J196;C9JQL4	Q14118	Dystroglycan;Alpha-dystroglycan;Beta-dystroglycan	DAG1	32.332	325720000	36	24.4182	25.459	24.726	25.1253	24.9323	24.7125
0.431684	0.298403	P07585;P07585-2;F8VXZ8;F8VUF6;F8VWU0;P07585-4;P07585-3;F8VX58;H0YI87;H0YIH3;F8VNV6	P07585;P07585-2	Decorin	DCN	323.31	3334700000	127	28.229	27.8599	27.54	27.9	28.0172	28.607
0.811938	0.764261	O95865;A0A140T971;Q5SSV3;Q5SRR8;H0Y7N1	O95865;A0A140T971;Q5SSV3;Q5SRR8	N(G),N(G)-dimethylarginine dimethylaminohydrolase 2	DDAH2	18.548	36232000	11	22.0959	22.8032	22.3004	23.4967	23.5925	22.403
0.0282521	-0.030255	A0A1X7SBZ2;A0A1W2PQ51;Q92841-1;Q92841-3;Q92841-2;Q92841	A0A1X7SBZ2;A0A1W2PQ51;Q92841-1;Q92841-3;Q92841-2;Q92841	Probable ATP-dependent RNA helicase DDX17	DDX17	16.676	2122500	10	22.2049	22.7052	21.9318	21.906	22.0411	22.804
0.117295	-0.180911	H0Y400;A0A140T9X3;A0A0G2JJZ9;Q5STU3;O00148;Q13838;Q13838-2;H0YCC6;A0A140T9X9;A0A140T996;F6UJC5;A0A140TA18;F6WLT2;O00148-2	H0Y400;A0A140T9X3;A0A0G2JJZ9;Q5STU3;O00148;Q13838;Q13838-2;H0YCC6;A0A140T9X9;A0A140T996;F6UJC5;A0A140TA18;F6WLT2;O00148-2	ATP-dependent RNA helicase DDX39A;Spliceosome RNA helicase DDX39B	DDX39B;DDX39A	13.837	14885000	4	22.0048	23.0511	23.6694	22.7171	23.2192	22.2463
0.414719	0.94136	Q5HYB6;P06753-5;P06753-2;A0A087WWU8;P06753-4;P06753-3;P06753-6;Q5VU61;J3KN67;D6R904;P06753-7;P06753;D6RFM2	Q5HYB6;P06753-5;P06753-2;A0A087WWU8;P06753-4;P06753-3;P06753-6;Q5VU61;J3KN67;D6R904;P06753-7;P06753	Tropomyosin alpha-3 chain	DKFZp686J1372;TPM3	69.341	152660000	24	21.4541	24.1761	24.4586	24.4715	24.3747	24.0666
0.320855	-0.916067	H0Y7V4;A0A075B6F3;Q96JB1-2;Q96JB1	H0Y7V4;A0A075B6F3;Q96JB1-2;Q96JB1	Dynein heavy chain 8, axonemal	DNAH8	10.24	116870000	17	21.3793	24.1495	24.9987	21.7554	23.0706	22.9533
0.85267	-0.9971	Q9C005	Q9C005	Protein dpy-30 homolog	DPY30	8.7647	26814000	9	22.7594	23.2115	22.2518	21.1813	21.3788	22.6715
0.109771	0.0703945	A0A1C7CYX9;Q16555;Q16555-2;E5RFU4;D6RF19	A0A1C7CYX9;Q16555;Q16555-2	Dihydropyrimidinase-related protein 2	DPYSL2	69.588	251410000	55	24.8752	25.3166	24.9819	25.1257	25.4588	24.8004
0.729109	-1.3231	Q14195;Q14195-2;H0YBT4;H0YB87;Q14117	Q14195;Q14195-2;H0YBT4	Dihydropyrimidinase-related protein 3	DPYSL3	3.1235	4381000	4	23.7656	22.8754	22.13	22.1362	22.422	20.2435
0.244994	0.414382	Q8NBI3	Q8NBI3	Draxin	DRAXIN	4.6245	42181000	7	22.0962	23.2716	21.7038	22.9912	21.8626	23.4609
0.123672	0.278336	Q02487-2;Q02487;A0A3B3ISU0	Q02487-2;Q02487;A0A3B3ISU0	Desmocollin-2	DSC2	20.992	46584000	11	21.6644	23.2623	22.9068	23.7031	21.571	23.3944
0.173037	-0.570996	Q14574-2;Q14574	Q14574-2;Q14574	Desmocollin-3	DSC3	13.317	134270000	13	24.8154	24.3072	21.7518	22.4867	22.016	24.6587
0.297861	0.322861	Q14126;J3KSI6	Q14126	Desmoglein-2	DSG2	205.73	659640000	70	25.5892	26.4699	25.0886	25.9314	25.8047	26.3801
0.866812	-0.325546	E9PGG1;E7EU01;E7EUM4;E7ERR6;E7ERH4;E7ET01;E7ETL8;E7EQU2;E7ESD3;E7EMU4;E7EV09;E7EQL5;Q13409-6;Q13409-3;Q13409-7;Q13409-2;Q13409-5;Q13409	E9PGG1;E7EU01;E7EUM4;E7ERR6;E7ERH4;E7ET01;E7ETL8;E7EQU2;E7ESD3;E7EMU4;E7EV09;E7EQL5;Q13409-6;Q13409-3;Q13409-7;Q13409-2;Q13409-5;Q13409	Cytoplasmic dynein 1 intermediate chain 2	DYNC1I2	21.059	8245200	8	21.8291	22.2113	22.1062	21.9465	21.7352	21.4883
0.271875	-0.488529	P30084	P30084	Enoyl-CoA hydratase, mitochondrial	ECHS1	2.49	9706400	2	21.8499	22.2828	22.7244	20.4601	22.312	22.6194
0.849926	0.540471	Q5VTE0;P68104;A0A087WVQ9;P68104-2;A0A087WV01;A0A2U3TZH3;Q05639;A0A2R8Y488;A0A2R8Y660;Q5JR01;A6PW80;A0A2R8YDN5	Q5VTE0;P68104;A0A087WVQ9;P68104-2;A0A087WV01;A0A2U3TZH3;Q05639	Putative elongation factor 1-alpha-like 3;Elongation factor 1-alpha 1;Elongation factor 1-alpha;Elongation factor 1-alpha 2	EEF1A1P5;EEF1A1;EEF1A2	106.12	504940000	94	24.9936	25.8126	25.4575	26.0904	26.1814	25.6134
0.0283712	-0.0593249	F8WF65;F2Z2G2;C9JZW3;P24534	F8WF65;F2Z2G2;C9JZW3;P24534	Elongation factor 1-beta	EEF1B2	29.475	32681000	10	23.4731	22.572	21.438	23.199	21.9991	22.107
0.665711	-0.865224	E9PK01;A0A087X1X7;E9PRY8;P29692;P29692-2;E9PQZ1;P29692-3;P29692-4;E9PQC9;H0YE58;H0YE72;E9PPR1;E9PL12;E9PQ49;E9PI39;E9PMW7;E9PIZ1;E9PK06;E9PL71;H0YCK7	E9PK01;A0A087X1X7;E9PRY8;P29692;P29692-2;E9PQZ1;P29692-3;P29692-4;E9PQC9;H0YE58;H0YE72;E9PPR1;E9PL12;E9PQ49;E9PI39	Elongation factor 1-delta	EEF1D	25.467	24060000	14	23.2005	23.4803	21.9005	21.3391	22.413	22.2335
0.249019	-0.564894	P26641;P26641-2	P26641;P26641-2	Elongation factor 1-gamma	EEF1G	17.8	51309000	15	22.0015	23.7864	22.2508	23.5069	21.2362	21.6008
0.0212693	0.0218646	P13639	P13639	Elongation factor 2	EEF2	23.634	165150000	37	24.4775	24.5083	24.3822	24.8491	23.7974	24.7871
0.592022	-0.532881	A0A0U1RQV3;Q12805-5;Q12805-2;Q12805-4;Q12805-3;Q12805	A0A0U1RQV3;Q12805-5;Q12805-2;Q12805-4;Q12805-3;Q12805	EGF-containing fibulin-like extracellular matrix protein 1	EFEMP1	2.8592	23130000	6	22.6593	23.3565	23.0968	21.903	22.506	23.105
1.51325	-0.615004	P60842;J3QR64;J3KTB5;J3QL43;J3QS69;J3KT12;P60842-2;J3KTN0;J3QLN6;J3KSZ0;E7EQG2;Q14240;Q14240-2;J3KT04;J3KS93;E7EMV8;J3KSN7;J3QKZ9;J3KS25	P60842;J3QR64;J3KTB5;J3QL43;J3QS69;J3KT12;P60842-2;J3KTN0;J3QLN6;J3KSZ0;E7EQG2;Q14240;Q14240-2	Eukaryotic initiation factor 4A-I;Eukaryotic initiation factor 4A-II;Eukaryotic initiation factor 4A-II, N-terminally processed	EIF4A1;EIF4A2	17.858	43439000	9	22.8197	22.9365	22.51	22.3278	22.2226	21.8708
0.0142179	0.047245	F8W0K0;F8VYE9;F8VSC7;F8VP89;F8VX11;E7EX17;P23588-2;P23588	F8W0K0;F8VYE9;F8VSC7;F8VP89;F8VX11;E7EX17;P23588-2;P23588	Eukaryotic translation initiation factor 4B	EIF4B	2.5807	7264900	2	22.3173	22.184	22.3011	23.1425	23.6641	20.1376
0.162013	-0.479632	Q15056-2;Q15056	Q15056-2;Q15056	Eukaryotic translation initiation factor 4H	EIF4H	1.9503	4855900	2	21.9198	21.1695	21.5908	23.0937	20.8037	19.3439
0.392665	0.5652	I3L397;I3L504;Q6IS14;P63241;F8WCJ1;C9J7B5;C9J4W5;Q9GZV4;P63241-2	I3L397;I3L504;Q6IS14;P63241;F8WCJ1;C9J7B5;C9J4W5;Q9GZV4;P63241-2	Eukaryotic translation initiation factor 5A;Eukaryotic translation initiation factor 5A-1-like;Eukaryotic translation initiation factor 5A-1;Eukaryotic translation initiation factor 5A-2	EIF5A;EIF5AL1;EIF5A2	4.8728	45956000	13	23.2409	21.634	21.7336	22.5113	23.3938	22.3991
1.01633	-1.74704	A0A0U1RQP7;Q8N8S7-3;Q8N8S7-2;Q8N8S7	A0A0U1RQP7;Q8N8S7-3;Q8N8S7-2;Q8N8S7	Protein enabled homolog	ENAH	19.357	6274000	10	22.9251	22.4593	22.9563	21.5911	22.0356	19.4729
0.0071267	-0.00538635	P06733;A0A2R8Y6G6;P06733-2;K7EM90;A0A2R8Y879;A0A2R8YEM5;K7ERS8;A0A2R8Y798;A0A2R8YEG5;A0A2R8Y6I8	P06733;A0A2R8Y6G6;P06733-2	Alpha-enolase	ENO1	323.31	3279900000	170	28.2829	28.6208	29.0562	28.4541	28.6653	28.8243
0.145061	0.266034	P09104-2;P09104;F5H0C8;P13929-3;P13929-2;P13929;E5RI09;E5RG95;K7EPM1;K7EKN2;E5RGZ4;F5H1C3	P09104-2;P09104;F5H0C8;P13929-3;P13929-2;P13929	Gamma-enolase;Enolase;Beta-enolase	ENO2;ENO3	78.348	91168000	17	23.503	22.4111	24.558	23.48	23.4681	24.322
1.10743	-1.11037	E7EUF1;Q13822;Q13822-3;Q13822-2;E5RJ49;E5RIA2	E7EUF1;Q13822;Q13822-3;Q13822-2;E5RJ49;E5RIA2	Ectonucleotide pyrophosphatase/phosphodiesterase family member 2	ENPP2	6.3219	36665000	12	23.1251	22.669	23.0211	22.7294	21.3967	21.358
0.69228	-0.622494	Q9NZ08;Q9NZ08-2	Q9NZ08;Q9NZ08-2	Endoplasmic reticulum aminopeptidase 1	ERAP1	5.5562	3589200	2	22.2293	22.7408	23.3097	22.5471	22.2243	21.6409
0.0854695	-0.299343	P84090;G3V279	P84090;G3V279	Enhancer of rudimentary homolog	ERH	125.19	93890000	10	20.6164	22.6276	24.7713	21.7366	22.7617	22.619
0.325004	-0.388172	P30040;F8VY02	P30040	Endoplasmic reticulum resident protein 29	ERP29	10.21	9314700	8	22.2669	22.7246	22.6501	21.7328	21.6471	23.0972
0.0946548	0.161715	H7BY36;A0A0D9SFL3;B0QYK0;C9JGE3;Q01844-2;Q01844-6;Q01844-3;Q01844;Q01844-5	H7BY36;A0A0D9SFL3;B0QYK0;C9JGE3;Q01844-2;Q01844-6;Q01844-3;Q01844;Q01844-5	RNA-binding protein EWS	EWSR1	6.4202	16503000	3	21.5064	22.4371	22.4809	21.6249	23.3278	21.9568
0.512697	0.338698	E7EQR4;P15311;E9PQ82;E9PNV3;A0A2R8Y5P0	E7EQR4;P15311	Ezrin	EZR	126.62	564670000	67	25.5711	26.0387	25.8245	25.6422	26.3468	26.4614
1.57839	1.48919	P07148;A8MW49;Q9NQV6-6	P07148;A8MW49;Q9NQV6-6	Fatty acid-binding protein, liver	FABP1	112.05	133260000	24	23.0559	23.7218	22.2315	24.5724	24.414	24.4904
0.0937984	-0.380458	Q01469;I6L8B7;A8MUU1	Q01469;I6L8B7	Fatty acid-binding protein, epidermal	FABP5	57.099	63346000	19	22.2078	22.6356	25.4295	25.1039	22.232	21.7956
0.0301086	0.0659186	O15540;O15540-2	O15540;O15540-2	Fatty acid-binding protein, brain	FABP7	28.599	171540000	22	23.4392	25.9027	24.3703	24.9471	24.5788	24.384
0.154351	-0.0684458	Q92520;C9JP35;C9JMN4	Q92520;C9JP35;C9JMN4	Protein FAM3C	FAM3C	21.998	159500000	29	24.5407	24.3549	24.109	24.0523	24.3392	24.4078
0.201466	0.328488	A0A0U1RQF0;P49327	A0A0U1RQF0;P49327	Fatty acid synthase;[Acyl-carrier-protein] S-acetyltransferase;[Acyl-carrier-protein] S-malonyltransferase;3-oxoacyl-[acyl-carrier-protein] synthase;3-oxoacyl-[acyl-carrier-protein] reductase;3-hydroxyacyl-[acyl-carrier-protein] dehydratase;Enoyl-[acyl-carrier-protein] reductase;Oleoyl-[acyl-carrier-protein] hydrolase	FASN	9.3927	4523300	4	21.8739	20.6233	21.6879	22.6847	21.0511	21.4348
0.050788	-0.0477435	B1AHL2;P23142-4;P23142-2;P23142-3;B1AHM7;H7C1M6;B1AHM9;B1AHN3;B1AHM8	B1AHL2;P23142-4	Fibulin-1	FBLN1	323.31	1934400000	86	28.238	27.4917	27.7809	28.0504	28.0051	27.3119
0.0491686	-0.125146	P23142;CON__ENSEMBL:ENSBTAP00000016046	P23142	Fibulin-1	FBLN1	20.562	273300000	21	24.5274	22.3297	23.8413	22.5557	23.2242	24.5431
0.473048	0.7173	P98095;P98095-2	P98095;P98095-2	Fibulin-2	FBLN2	2.4447	19855000	5	22.8551	21.1184	21.9475	23.5369	22.1982	22.3378
0.123885	0.26417	A0A087WYV8;P35556	A0A087WYV8;P35556	Fibrillin-2	FBN2	14.662	117870000	17	21.5122	23.7564	22.3541	21.9713	23.3542	23.0898
1.81571	2.48899	P02671-2;P02671;A0A087WUA0	P02671-2;P02671;A0A087WUA0	Fibrinogen alpha chain;Fibrinopeptide A;Fibrinogen alpha chain	FGA	30.224	143140000	21	22.008	24.0782	22.7691	25.3311	25.6343	25.357
1.37024	2.33908	P02675;D6REL8	P02675;D6REL8	Fibrinogen beta chain;Fibrinopeptide B;Fibrinogen beta chain	FGB	65.776	159810000	22	22.12	24.5211	22.1594	25.3408	25.3492	25.1278
0.727897	0.64812	Q8TAT2	Q8TAT2	Fibroblast growth factor-binding protein 3	FGFBP3	103.89	34838000	7	21.4881	22.735	22.2414	22.43	22.9927	22.9862
0.911934	2.22366	C9JEU5;C9JC84;P02679-2;P02679;C9JPQ9;C9JU00	C9JEU5;C9JC84;P02679-2;P02679	Fibrinogen gamma chain	FGG	49.243	148970000	29	21.4721	25.3199	22.7516	25.4737	25.5808	25.16
1.77199	-1.49203	A0A1B0GVK0;Q14314	A0A1B0GVK0;Q14314	Fibroleukin	FGL2	3.2591	9198600	9	22.2799	22.498	22.5689	21.5437	21.0489	20.2782
0.14504	-0.230209	P07954-2;P07954	P07954-2;P07954	Fumarate hydratase, mitochondrial	FH	2.0239	15994000	5	21.0482	22.5176	22.7248	21.4026	22.3122	21.8853
0.402965	-0.501797	Q5W0X3;A0A087WZM5;P62942	Q5W0X3;A0A087WZM5;P62942	Peptidyl-prolyl cis-trans isomerase;Peptidyl-prolyl cis-trans isomerase FKBP1A	FKBP1A	13.369	19980000	9	23.1694	21.9193	21.9567	22.4669	21.7383	21.3348
0.429561	0.437235	Q00688;G3V5F2	Q00688	Peptidyl-prolyl cis-trans isomerase FKBP3	FKBP3	19.36	96794000	22	22.9014	23.577	24.2688	24.1755	24.2291	23.6544
0.00185938	-0.00544612	Q02790	Q02790	Peptidyl-prolyl cis-trans isomerase FKBP4;Peptidyl-prolyl cis-trans isomerase FKBP4, N-terminally processed	FKBP4	4.8596	21353000	7	21.6634	21.9418	24.6203	22.5338	22.6242	23.0512
0.849552	-0.627013	Q60FE5;P21333-2;P21333;A0A087WWY3;H0Y5F3;H0Y5C6;F8WE98;O75369-5;O75369-4;O75369-6;O75369-3;O75369-2;O75369-9;O75369;O75369-8	Q60FE5;P21333-2;P21333;A0A087WWY3	Filamin-A	FLNA	25.051	94103000	31	24.4089	23.7477	24.5942	23.7365	23.9474	23.1859
0.00422469	-0.0135657	Q14315-2;Q14315	Q14315-2;Q14315	Filamin-C	FLNC	4.8272	11503000	6	21.798	22.6211	21.7321	21.0305	24.0594	21.0205
0.108851	-0.133624	A0A3B3IRN5;Q06828	A0A3B3IRN5;Q06828	Fibromodulin	FMOD	8.871	9391100	4	21.9617	23.3183	22.9978	22.5987	22.3436	22.9345
2.04049	0.575083	P02751-17;P02751-3;P02751;P02751-6;P02751-5;P02751-10;P02751-9;P02751-14;P02751-8;P02751-4;P02751-12;H0Y7Z1;P02751-16;P02751-2;H0Y4K8	P02751-17;P02751-3;P02751;P02751-6;P02751-5;P02751-10;P02751-9;P02751-14;P02751-8;P02751-4;P02751-12;H0Y7Z1	Fibronectin;Anastellin;Ugl-Y1;Ugl-Y2;Ugl-Y3	FN1	323.31	3683400000	271	28.2175	28.5641	28.5526	29.1063	28.9756	28.9774
0.320455	-0.555428	C9JYK2;E9PGA7;Q9Y2L6-2;Q9Y2L6	C9JYK2;E9PGA7;Q9Y2L6-2;Q9Y2L6	FERM domain-containing protein 4B	FRMD4B	5.7359	88300000	4	22.8836	23.3998	21.736	21.2532	22.0713	23.0287
0.106336	0.148403	Q16658;C9JPH9;C9JFC0;A0A0A0MSB2	Q16658	Fascin	FSCN1	35.218	220700000	28	24.0106	25.3003	24.3095	25.161	24.8227	24.082
0.0328803	0.0754528	Q12841-2;Q12841	Q12841-2;Q12841	Follistatin-related protein 1	FSTL1	5.972	105550000	10	23.2626	24.5112	22.1407	22.9969	23.0395	24.1045
0.302003	0.266703	E9PEB5;Q96AE4;Q96AE4-2;C9JSZ1	E9PEB5;Q96AE4;Q96AE4-2;C9JSZ1	Far upstream element-binding protein 1	FUBP1	40.535	2481000	5	22.2639	21.4845	22.157	22.7236	21.8196	22.1624
0.0426889	0.101206	H0YGU9;H0YFU9;A0A3B3ISG8;Q9NY28	H0YGU9;H0YFU9;A0A3B3ISG8;Q9NY28	Probable polypeptide N-acetylgalactosaminyltransferase 8	GALNT8	4.0644	13386000	0	22.9001	21.5067	21.3614	22.9143	22.3807	20.7768
0.633223	0.869601	Q14697;Q14697-2;F5H6X6;E9PKU7;E9PNH1	Q14697;Q14697-2;F5H6X6;E9PKU7	Neutral alpha-glucosidase AB	GANAB	54.294	43741000	13	21.8878	22.5004	20.9473	22.0838	22.3841	23.4764
0.0223648	-0.0356274	P17677;P17677-2	P17677;P17677-2	Neuromodulin	GAP43	106.87	54094000	27	23.5101	22.4492	23.7817	23.6128	23.4923	22.5291
0.794679	0.361994	P04406;P04406-2;E7EUT5;O14556	P04406;P04406-2;E7EUT5	Glyceraldehyde-3-phosphate dehydrogenase	GAPDH	207.77	1451700000	139	26.9357	27.5921	27.1181	27.6837	27.6217	27.4266
2.49512	0.786895	A0A1W2PQV2;H3BUH9;P23434	A0A1W2PQV2;H3BUH9;P23434	Glycine cleavage system H protein, mitochondrial	GCSH	1.9881	0	1	22.1973	21.9863	22.2729	22.8208	22.8803	23.116
0.159458	-0.350137	Q99988	Q99988	Growth/differentiation factor 15	GDF15	3.7218	7414200	4	22.1996	22.3438	22.2665	23.3334	20.4835	21.9427
0.0091008	-0.00830714	P31150;G5E9U5	P31150	Rab GDP dissociation inhibitor alpha	GDI1	216.31	668570000	91	26.1037	26.7407	27.0649	26.7035	26.7558	26.4251
0.190716	-0.142153	P50395;P50395-2;Q5SX87;V9GYF8;Q5SX90;Q5SX91;Q5SX86;V9GYJ7	P50395;P50395-2;Q5SX87	Rab GDP dissociation inhibitor beta	GDI2	49.227	215790000	39	24.8179	24.7645	25.4304	25.1702	24.8986	24.5175
0.119696	-0.15652	Q92820	Q92820	Gamma-glutamyl hydrolase	GGH	17.551	38831000	17	22.2144	22.4213	23.4359	22.3935	23.0936	22.1149
0.927401	0.137269	Q04760-2;Q04760	Q04760-2;Q04760	Lactoylglutathione lyase	GLO1	9.5062	61317000	25	22.8066	22.6383	22.8052	22.9429	22.8078	22.9112
0.49399	0.731928	O76003	O76003	Glutaredoxin-3	GLRX3	9.1728	3008700	2	21.7636	20.8884	23.0954	22.7555	22.688	22.4998
0.435623	0.674737	P00367-2;P00367-3;P49448;P00367	P00367-2;P00367-3;P49448;P00367	Glutamate dehydrogenase 1, mitochondrial;Glutamate dehydrogenase 2, mitochondrial	GLUD1;GLUD2	2.2318	0	1	23.4235	22.1291	22.6421	24.482	23.0371	22.6998
0.235001	0.246258	P17900	P17900	Ganglioside GM2 activator;Ganglioside GM2 activator isoform short	GM2A	5.3203	11606000	5	22.3023	22.3326	21.0904	22.2306	22.0672	22.1662
0.330927	-0.439625	P63096-2;P04899-6;P04899-3;P04899-5;P04899-2;P63096;P04899;A0A3B3ITM0;P09471-2;P08754;P04899-4	P63096-2;P04899-6;P04899-3;P04899-5;P04899-2;P63096;P04899;A0A3B3ITM0;P09471-2;P08754;P04899-4	Guanine nucleotide-binding protein G(i) subunit alpha-1;Guanine nucleotide-binding protein G(i) subunit alpha-2;Guanine nucleotide-binding protein G(k) subunit alpha	GNAI1;GNAI2;GNAI3	5.6568	10910000	4	22.9072	21.7286	22.6927	22.7849	21.8262	21.3985
0.224004	0.472102	P62873-2;P62873;B1AKQ8;F6X3N5;F6UT28;C9JZN1;C9JIS1;C9JXA5;E7EP32;Q9HAV0;P62879;C9JD14;F5H8J8;F5H100;B3KVK2;F5H0S8;E9PCP0;P16520-2;P16520	P62873-2;P62873;B1AKQ8;F6X3N5;F6UT28;C9JZN1;C9JIS1;C9JXA5;E7EP32;Q9HAV0;P62879	Guanine nucleotide-binding protein G(I)/G(S)/G(T) subunit beta-1;Guanine nucleotide-binding protein subunit beta-4;Guanine nucleotide-binding protein G(I)/G(S)/G(T) subunit beta-2	GNB1;GNB2;GNB4	18.551	108710000	18	21.8437	24.6164	22.6829	23.4043	23.5411	23.6139
1.37867	1.23909	Q9UBI6	Q9UBI6	Guanine nucleotide-binding protein G(I)/G(S)/G(O) subunit gamma-12	GNG12	2.4668	2038800	2	21.7507	21.7892	22.0543	22.4051	23.0864	23.8199
0.0696477	-0.192126	G3V2C9;P59768	G3V2C9;P59768	Guanine nucleotide-binding protein subunit gamma;Guanine nucleotide-binding protein G(I)/G(S)/G(O) subunit gamma-2	GNG2	4.3771	0	2	22.1784	24.2253	21.1123	21.9422	22.9287	22.0688
0.164492	-0.409047	D6RB13;D6RAY7;D6R9P4;D6RFF8;P46926	D6RB13;D6RAY7;D6R9P4;D6RFF8;P46926	Glucosamine-6-phosphate isomerase;Glucosamine-6-phosphate isomerase 1	GNPDA1	6.5166	6514600	2	21.0576	23.224	22.3647	23.1733	21.3178	20.9281
0.478159	1.76961	Q14789-4;Q14789-3;Q14789;Q14789-2	Q14789-4;Q14789-3;Q14789;Q14789-2	Golgin subfamily B member 1	GOLGB1	1.8825	842390000	2	21.7308	22.9774	21.6349	21.5938	23.2263	26.8317
0.270346	-0.716536	Q8NBJ4-2;Q8NBJ4;F8WAT9;C9JYM4;C9J941	Q8NBJ4-2;Q8NBJ4;F8WAT9;C9JYM4	Golgi membrane protein 1	GOLM1	140.01	120270000	17	22.3184	22.4845	25.2569	22.9946	23.2052	21.7105
0.0681109	-0.118539	P17174-2;P17174	P17174-2;P17174	Aspartate aminotransferase, cytoplasmic	GOT1	8.0431	40924000	11	22.3797	23.0525	24.4158	23.1142	23.3616	23.0166
0.458466	-0.639984	H7C410;P35052;H7BZL4;H7C024;P35052-2	H7C410;P35052;H7BZL4;H7C024	Glypican-1;Secreted glypican-1	GPC1	12.568	52547000	10	23.3366	24.5204	22.4777	23.0253	22.6748	22.7147
0.242186	-0.66384	Q8N158;A0A0J9YXG7	Q8N158;A0A0J9YXG7	Glypican-2;Secreted glypican-2	GPC2	3.6022	2632000	6	22.5955	21.8686	22.4004	22.0526	19.6129	23.2075
1.19475	-0.482054	H0Y3U6;P51654-2;P51654;P51654-3	H0Y3U6;P51654-2;P51654;P51654-3	Glypican-3;Secreted glypican-3	GPC3	2.7383	13413000	10	22.2612	21.8237	21.8263	21.6316	21.2462	21.5873
0.148225	-0.0308456	A0A0A0MTS2;A0A2U3TZU2;P06744;P06744-2;A0A0J9YXP8;A0A0J9YX90;A0A0J9YYH3;A0A2R8Y6C7;K7EQ48;CON__Q3ZBD7	A0A0A0MTS2;A0A2U3TZU2;P06744;P06744-2;A0A0J9YXP8;A0A0J9YX90;A0A0J9YYH3;A0A2R8Y6C7;K7EQ48	Glucose-6-phosphate isomerase	GPI	27.399	81785000	23	22.9983	23.1662	23.2588	23.1184	23.129	23.0835
0.796127	-1.74032	P51674-3;P51674-2;P51674	P51674-3;P51674-2;P51674	Neuronal membrane glycoprotein M6-a	GPM6A	4.9556	4638100	3	23.0515	22.7437	22.0957	21.2224	22.3785	19.069
0.136322	0.18863	P09210;P08263	P09210;P08263	Glutathione S-transferase A2;Glutathione S-transferase A1;Glutathione S-transferase A1, N-terminally processed	GSTA2;GSTA1	2.1795	0	2	22.5583	22.1899	21.6572	23.1796	22.0628	21.7288
0.236279	-0.416274	E9PLF1;E9PHN7;E9PHN6;F6XZQ7;P28161-2;P28161	E9PLF1;E9PHN7;E9PHN6;F6XZQ7;P28161-2;P28161	Glutathione S-transferase Mu 2	GSTM2	2.6814	12404000	7	22.2611	22.9342	20.9707	22.0699	21.9764	20.8708
0.326196	-0.968244	P09211;A8MX94;A0A087X2E9;A0A087X243	P09211;A8MX94	Glutathione S-transferase P	GSTP1	289.77	495140000	35	25.2695	26.0114	25.8634	26.3633	22.4048	25.4715
0.302841	-0.674925	Q92522	Q92522	Histone H1x	H1FX	2.3174	3274000	1	24.1291	21.252	21.6121	21.7022	21.5515	21.7147
0.207856	0.425484	Q71UI9;P0C0S5;C9J0D1;Q71UI9-3;Q71UI9-4;Q71UI9-2;C9J386	Q71UI9;P0C0S5;C9J0D1;Q71UI9-3;Q71UI9-4;Q71UI9-2	Histone H2A.V;Histone H2A.Z;Histone H2A	H2AFV;H2AFZ	2.6685	14131000	3	21.9715	21.1232	23.1278	22.5641	21.5365	23.3984
0.618894	-0.705879	K7EK07;Q71DI3;P84243;P68431;K7EMV3;B4DEB1;K7ES00;Q16695;Q5TEC6;Q6NXT2;K7EP01	K7EK07;Q71DI3;P84243;P68431;K7EMV3;B4DEB1;K7ES00;Q16695;Q5TEC6;Q6NXT2;K7EP01	Histone H3;Histone H3.2;Histone H3.3;Histone H3.1;Histone H3.1t;Histone H3.3C	H3F3B;HIST2H3A;H3F3A;HIST1H3A;HIST3H3;HIST2H3PS2;H3F3C	15.708	1089300000	30	27.1443	27.2722	28.6851	27.1567	27.1068	26.7205
0.215069	-0.262176	P51858-2;P51858;P51858-3	P51858-2;P51858;P51858-3	Hepatoma-derived growth factor	HDGF	30.406	162290000	26	24.0581	24.1388	25.4496	24.0996	24.5722	24.1883
0.0105654	-0.0251204	K7ER15;Q9H0R4-2;Q9H0R4	K7ER15;Q9H0R4-2;Q9H0R4	Haloacid dehalogenase-like hydrolase domain-containing protein 2	HDHD2	1.8183	0	1	21.1919	23.276	21.9272	21.5055	21.7329	23.0813
0.357136	2.46744	Q5T3Q7;Q9H583	Q5T3Q7;Q9H583	HEAT repeat-containing protein 1;HEAT repeat-containing protein 1, N-terminally processed	HEATR1	3.5427	8267400000	6	22.0229	22.6154	22.9593	22.051	22.2223	30.7266
0.00337498	0.00493368	P07686;H0Y9B6;Q5URX0	P07686;H0Y9B6;Q5URX0	Beta-hexosaminidase subunit beta;Beta-hexosaminidase subunit beta chain B;Beta-hexosaminidase subunit beta chain A	HEXB	2.7801	14227000	6	22.2113	22.1543	22.3629	21.8614	23.1905	21.6913
0.731913	0.739897	P16401	P16401	Histone H1.5	HIST1H1B	4.638	80481000	8	21.2348	22.5308	22.1703	22.6847	22.2936	23.1773
0.856116	2.50137	P16403;P10412;P16402;P22492;Q02539	P16403;P10412;P16402;P22492;Q02539	Histone H1.2;Histone H1.4;Histone H1.3;Histone H1t;Histone H1.1	HIST1H1C;HIST1H1E;HIST1H1D;HIST1H1T;HIST1H1A	14.843	573810000	13	23.1872	26.2797	21.7678	25.7374	26.3754	26.626
0.558573	0.940607	Q96QV6;P16104;Q8IUE6	Q96QV6;P16104;Q8IUE6	Histone H2A type 1-A;Histone H2AX;Histone H2A type 2-B	HIST1H2AA;H2AFX;HIST2H2AB	7.062	0	3	21.2685	21.1366	23.0656	23.5386	22.6259	22.128
0.447261	-0.620612	Q93077;Q7L7L0;P04908;A0A0U1RR32;A0A0U1RRH7;Q99878;Q96KK5;Q9BTM1;Q16777;Q6FI13;P20671;P0C0S8;A0A3B3IS11;Q9BTM1-2;H0YFX9;Q71UI9-5	Q93077;Q7L7L0;P04908;A0A0U1RR32;A0A0U1RRH7;Q99878;Q96KK5;Q9BTM1;Q16777;Q6FI13;P20671;P0C0S8;A0A3B3IS11;Q9BTM1-2	Histone H2A type 1-C;Histone H2A type 3;Histone H2A type 1-B/E;Histone H2A type 1-J;Histone H2A type 1-H;Histone H2A.J;Histone H2A type 2-C;Histone H2A type 2-A;Histone H2A type 1-D;Histone H2A type 1	HIST1H2AC;HIST3H2A;HIST1H2AB;HIST1H2AJ;HIST1H2AH;H2AFJ;HIST2H2AC;HIST2H2AA3;HIST1H2AD;HIST1H2AG	122.31	2693500000	44	27.8443	28.8382	29.8834	28.3981	28.2449	28.0611
1.73377	-1.08467	U3KQK0;Q99879;Q99877;Q93079;Q5QNW6;P62807;P58876;P57053;O60814;Q5QNW6-2;Q99880;Q16778;P33778;P23527;P06899;Q8N257;A0A2R8Y619;Q96A08	U3KQK0;Q99879;Q99877;Q93079;Q5QNW6;P62807;P58876;P57053;O60814;Q5QNW6-2;Q99880;Q16778;P33778;P23527;P06899	Histone H2B;Histone H2B type 1-M;Histone H2B type 1-N;Histone H2B type 1-H;Histone H2B type 2-F;Histone H2B type 1-C/E/F/G/I;Histone H2B type 1-D;Histone H2B type F-S;Histone H2B type 1-K;Histone H2B type 1-L;Histone H2B type 2-E;Histone H2B type 1-B;Histone H2B type 1-O;Histone H2B type 1-J	HIST1H2BN;HIST1H2BM;HIST1H2BH;HIST2H2BF;HIST1H2BC;HIST1H2BD;H2BFS;HIST1H2BK;HIST1H2BL;HIST2H2BE;HIST1H2BB;HIST1H2BO;HIST1H2BJ	19.121	2080800000	23	28.3406	28.3095	29.0848	27.3424	27.3972	27.7412
0.272419	-0.422269	P62805	P62805	Histone H4	HIST1H4A	25.265	1180800000	45	26.8806	26.7286	28.5805	27.264	26.6341	27.0249
0.602612	-1.04821	P17096-2;P17096	P17096-2;P17096	High mobility group protein HMG-I/HMG-Y	HMGA1	6.1887	3279400	3	23.1399	21.9939	21.7059	22.2097	20.016	21.4694
0.283712	0.521766	F5H2U8;F5H2A4;F5H6H0;P52926-3;P52926-6;P52926-4;P52926-5;P52926-2;P52926	F5H2U8;F5H2A4;F5H6H0;P52926-3;P52926-6;P52926-4;P52926-5;P52926-2;P52926	High mobility group protein HMGI-C	HMGA2	33.376	13634000	11	22.3991	21.2649	23.3596	23.4418	23.1193	22.0277
0.311804	1.00685	Q5T7C4;P09429;B2RPK0	Q5T7C4;P09429	High mobility group protein B1	HMGB1	38.386	405860000	32	22.277	25.179	26.7761	25.8597	25.6135	25.7794
0.0531931	-0.141322	P26583;D6R9A6	P26583;D6R9A6	High mobility group protein B2	HMGB2	17.952	67447000	16	22.5672	22.2548	24.3483	21.6341	23.6227	23.4895
0.310698	-0.850645	P05204	P05204	Non-histone chromosomal protein HMG-17	HMGN2	25.112	32063000	12	22.1686	21.4535	24.5522	21.5833	23.0449	20.9941
0.155963	0.186558	A0A087WZE9;Q15651-2;Q15651	A0A087WZE9;Q15651-2;Q15651	High mobility group nucleosome-binding domain-containing protein 3	HMGN3	2.1415	12621000	5	22.009	21.1035	21.8313	21.5743	21.3985	22.5306
0.0893573	0.082173	F8W6I7;P09651-3;P09651-2;P09651;F8VZ49;Q32P51;F8VTQ5;F8VYN5;F8W646;H0YH80;A0A2R8Y4L2	F8W6I7;P09651-3;P09651-2;P09651;F8VZ49;Q32P51;F8VTQ5;F8VYN5;F8W646;H0YH80;A0A2R8Y4L2	Heterogeneous nuclear ribonucleoprotein A1;Heterogeneous nuclear ribonucleoprotein A1, N-terminally processed;Heterogeneous nuclear ribonucleoprotein A1-like 2	HNRNPA1;HNRNPA1L2	75.694	251350000	65	24.1454	25.0685	24.7517	24.9159	24.9257	24.3705
0.0356464	-0.0560989	P22626-2;P22626;A0A087WUI2	P22626-2;P22626;A0A087WUI2	Heterogeneous nuclear ribonucleoproteins A2/B1	HNRNPA2B1	37.228	271470000	37	24.285	25.576	25.0276	25.2904	25.2816	24.1483
0.326332	-0.636456	P51991;P51991-2;H7C1J8	P51991;P51991-2	Heterogeneous nuclear ribonucleoprotein A3	HNRNPA3	5.8361	5475500	4	21.8825	22.4442	21.9247	22.2975	19.8873	22.1574
0.298847	0.475168	D6R9P3;D6RD18;D6RBZ0;Q99729-3;Q99729-2;Q99729-4;Q99729	D6R9P3;D6RD18;D6RBZ0;Q99729-3;Q99729-2;Q99729-4;Q99729	Heterogeneous nuclear ribonucleoprotein A/B	HNRNPAB	6.1151	103130000	21	22.2155	24.173	23.9567	24.2608	23.8698	23.64
0.097715	0.103548	G3V576;G3V4W0;B4DY08;B2R5W2;G3V4C1;G3V2Q1;P07910-4;P07910-2;P07910;G3V5X6;G3V3K6;G3V251;B4DSU6;G3V555;G3V575;G3V4M8	G3V576;G3V4W0;B4DY08;B2R5W2;G3V4C1;G3V2Q1;P07910-4;P07910-2;P07910;G3V5X6;G3V3K6;G3V251;B4DSU6;G3V555;G3V575;G3V4M8	Heterogeneous nuclear ribonucleoproteins C1/C2	HNRNPC	39.749	121180000	21	23.4097	24.5532	23.6852	23.6993	24.2496	24.0098
0.598137	-1.21768	H0Y8G5;Q14103-3;Q14103;H0YA96;D6RAF8;Q14103-4;Q14103-2;D6RF44;D6RD83;D6RBQ9	H0Y8G5;Q14103-3;Q14103;H0YA96;D6RAF8;Q14103-4;Q14103-2;D6RF44;D6RD83;D6RBQ9	Heterogeneous nuclear ribonucleoprotein D0	HNRNPD	112.03	236600000	29	24.9427	25.4077	25.0772	25.1221	24.4911	22.1613
0.0795244	0.144139	A0A087WUK2;O14979-3;O14979-2;O14979	A0A087WUK2;O14979-3;O14979-2;O14979	Heterogeneous nuclear ribonucleoprotein D-like	HNRNPDL	2.4289	14805000	3	21.9878	21.7353	21.8017	23.1655	20.9894	21.8023
0.64539	1.22095	E7EQJ0;D6RAM1;E5RGV0;D6R9T0;D6RFM3;D6RIT2;D6RIU0;D6RDU3;D6RJ04;D6RIH9;D6RBM0;E9PCY7;G8JLB6;P31943;E5RJ94;D6R9D3;D6RF17;D6RDL0;E5RGH4;H0YAQ2;E7EN40;P55795	E7EQJ0;D6RAM1;E5RGV0;D6R9T0;D6RFM3;D6RIT2;D6RIU0;D6RDU3;D6RJ04;D6RIH9;D6RBM0;E9PCY7;G8JLB6;P31943;E5RJ94;D6R9D3;D6RF17;D6RDL0;E5RGH4;H0YAQ2;E7EN40;P55795	Heterogeneous nuclear ribonucleoprotein H;Heterogeneous nuclear ribonucleoprotein H, N-terminally processed;Heterogeneous nuclear ribonucleoprotein H2	HNRNPH1;HNRNPH2	61.619	3208700	7	22.1741	20.0509	22.1386	23.5202	21.832	22.6743
0.23004	-0.185218	P61978-3;P61978;P61978-2;Q5T6W2;S4R457;S4R359	P61978-3;P61978;P61978-2;Q5T6W2	Heterogeneous nuclear ribonucleoprotein K	HNRNPK	102.78	1041000000	34	26.8217	26.895	27.2019	26.2762	26.7945	27.2922
0.238481	0.767358	P14866	P14866	Heterogeneous nuclear ribonucleoprotein L	HNRNPL	6.2852	4742100	5	22.1278	20.4114	22.2705	20.1678	23.1452	23.7988
0.248193	-0.192165	A0A1X7SBS1;A0A1W2PPS1;Q00839-2;Q00839;A0A1W2PP35;A0A1W2PQ74;A0A1W2PQL0;A0A1W2PP34;A0A1W2PPL4;A0A1W2PPH7;Q5RI18;A0A1W2PRZ7;A0A1W2PPE9;A0A1W2PNG3;A0A1W2PRI6;A0A1W2PP22;A0A1W2PQD4	A0A1X7SBS1;A0A1W2PPS1;Q00839-2;Q00839;A0A1W2PP35;A0A1W2PQ74;A0A1W2PQL0;A0A1W2PP34;A0A1W2PPL4;A0A1W2PPH7;Q5RI18	Heterogeneous nuclear ribonucleoprotein U	HNRNPU	27.717	68600000	23	22.6718	22.9647	23.2943	23.1096	22.2973	22.9474
1.06898	0.873994	A0A087WU08;A0A0C4DGL8;J3QLC9;J3QR68;H0Y300;P00738-2;P00738;H3BS21;A0A0A0MRD9;P00739;P00739-2	A0A087WU08;A0A0C4DGL8;J3QLC9;J3QR68;H0Y300;P00738-2;P00738;H3BS21;A0A0A0MRD9;P00739;P00739-2	Haptoglobin;Haptoglobin alpha chain;Haptoglobin beta chain;Haptoglobin-related protein	HP;HPR	6.306	0	4	21.6636	21.3726	21.0806	21.8243	21.9834	22.9311
1.2298	-0.415401	P02790;Q9BS19	P02790;Q9BS19	Hemopexin	HPX	323.31	26379000000	408	32.1938	31.6922	31.8619	31.4434	31.6185	31.4398
0.0959062	-0.315486	O75506	O75506	Heat shock factor-binding protein 1	HSBP1	10.874	6663700	6	21.6743	20.6837	21.5792	22.8959	21.1196	18.9752
0.0545601	-0.0816994	P07900;P07900-2;Q14568;G3V2J8;Q58FF6;Q58FG0;Q58FG1	P07900;P07900-2	Heat shock protein HSP 90-alpha	HSP90AA1	306.98	1917900000	150	27.1289	28.322	28.6765	28.2049	28.1513	27.5262
0.00834891	-0.00909106	P08238;Q58FF7	P08238	Heat shock protein HSP 90-beta	HSP90AB1	96.415	335500000	69	24.7099	25.9231	25.2722	25.438	25.2098	25.2301
0.22938	-0.291868	Q58FF8	Q58FF8	Putative heat shock protein HSP 90-beta 2	HSP90AB2P	3.5264	38790000	8	22.3964	23.1083	22.3914	21.4731	22.8818	22.6655
0.505585	0.616641	P14625;Q96GW1;A0A1W2PRR1;F8W026;H0YIV0	P14625;Q96GW1;A0A1W2PRR1	Endoplasmin	HSP90B1	71.194	90651000	40	21.8144	23.0662	23.535	23.6824	23.402	23.1812
0.601563	-0.813387	A0A0G2JIW1;P0DMV8-2;P0DMV9;P0DMV8;V9GZ37	A0A0G2JIW1;P0DMV8-2;P0DMV9;P0DMV8;V9GZ37	Heat shock 70 kDa protein 1A;Heat shock 70 kDa protein 1B	HSPA1A;HSPA1B	48.892	32116000	7	22.2356	22.6027	24.1726	22.0792	22.0669	22.4245
0.835454	0.638934	P34932;A0A087WTS8;A0A087WYC1;P34932-2	P34932;A0A087WTS8;A0A087WYC1	Heat shock 70 kDa protein 4	HSPA4	3.4115	27586000	5	21.5911	22.273	22.4945	22.9267	23.0412	22.3074
0.792721	0.588612	P11021	P11021	78 kDa glucose-regulated protein	HSPA5	36.178	121480000	37	23.2392	23.2687	24.1832	24.4065	23.8981	24.1524
0.17054	0.0756232	E9PKE3;P11142;P11142-2;E9PNE6;E9PN89;E9PLF4;E9PQQ4;E9PQK7;E9PK54;E9PN25;E9PPY6;A8K7Q2;P54652;E9PI65;E9PS65;E9PM13;P17066	E9PKE3;P11142;P11142-2;E9PNE6;E9PN89;E9PLF4	Heat shock cognate 71 kDa protein	HSPA8	188.2	610000000	79	25.8529	26.2804	26.1104	26.0412	26.0476	26.3818
0.544676	-0.541507	P04792;C9J3N8;F8WE04	P04792;C9J3N8;F8WE04	Heat shock protein beta-1	HSPB1	5.1	50149000	13	22.1579	23.467	23.4686	22.5712	22.4004	22.4974
0.0266523	-0.0166486	P10809;E7ESH4;E7EXB4;C9JL25;P10809-2;C9J0S9;C9JL19;C9JCQ4	P10809	60 kDa heat shock protein, mitochondrial	HSPD1	175.85	231650000	68	24.5901	25.0074	24.8777	24.7656	25.1208	24.5388
0.325675	0.474542	P61604;B8ZZ54;B8ZZL8;S4R3N1	P61604;B8ZZ54;B8ZZL8	10 kDa heat shock protein, mitochondrial	HSPE1	51.131	61330000	19	22.0624	21.1931	22.3079	21.4834	23.1948	22.3088
0.18818	-0.196889	P98160;A0A3B3IT11	P98160	Basement membrane-specific heparan sulfate proteoglycan core protein;Endorepellin;LG3 peptide	HSPG2	19.41	175240000	29	23.8534	24.6246	24.0984	23.3373	24.3163	24.3322
0.514113	0.352498	H0Y7G9;A0A3B3IU24;Q92743	H0Y7G9;A0A3B3IU24;Q92743	Serine protease HTRA1	HTRA1	1.8522	0	1	22.0849	21.8429	21.6977	22.3182	21.7061	22.6586
0.546153	0.813115	A0A087X054;Q9Y4L1	A0A087X054;Q9Y4L1	Hypoxia up-regulated protein 1	HYOU1	2.137	8152000	2	22.4777	22.6637	21.5764	22.0949	24.0548	23.0075
0.089724	0.0568536	O75874;C9JJE5;C9JLU6;C9J4N6	O75874	Isocitrate dehydrogenase [NADP] cytoplasmic	IDH1	152.33	313810000	58	25.3159	25.1182	25.7936	25.2599	25.5751	25.5633
0.222853	0.107471	H0YL11;P48735-2;P48735	H0YL11;P48735-2;P48735	Isocitrate dehydrogenase [NADP], mitochondrial	IDH2	6.4068	21215000	5	22.0173	22.2695	21.8067	21.897	22.1654	22.3535
1.37547	-0.503823	P01344;P01344-2;P01344-3	P01344;P01344-2;P01344-3	Insulin-like growth factor II;Insulin-like growth factor II;Insulin-like growth factor II Ala-25 Del;Preptin	IGF2	31.901	112540000	18	24.0261	23.71	24.1136	23.3206	23.3332	23.6844
0.56551	0.159658	P18065;C9JMY1;C9JW52;H7C1H0	P18065;C9JMY1	Insulin-like growth factor-binding protein 2	IGFBP2	83.965	1388600000	95	27.3849	27.4096	27.0841	27.4594	27.3295	27.5686
0.493154	0.183891	H0Y485;H0Y5K2;B3KWK7;A6XND1;A6XND0;P17936;P17936-2;C9JMX4	H0Y485;H0Y5K2;B3KWK7;A6XND1;A6XND0;P17936;P17936-2;C9JMX4	Insulin-like growth factor-binding protein 3	IGFBP3	78.349	454740000	17	25.5611	25.6879	26.0512	26.0891	25.8673	25.8954
0.0953379	-0.297953	P22692-2;P22692	P22692-2;P22692	Insulin-like growth factor-binding protein 4	IGFBP4	2.0243	12661000	3	21.9773	21.8429	22.2761	22.2236	23.3645	19.6142
0.256823	1.07331	P24593;C9JXX4	P24593;C9JXX4	Insulin-like growth factor-binding protein 5	IGFBP5	184.23	333150000	60	21.1848	26.0597	26.1524	25.8434	25.7629	25.0105
1.57516	-2.0659	Q16270-2;Q16270	Q16270-2;Q16270	Insulin-like growth factor-binding protein 7	IGFBP7	22.787	89849000	21	26.1071	24.7042	24.6655	23.3385	23.5786	22.3619
0.467066	0.884225	Q8WX77	Q8WX77	Insulin-like growth factor-binding protein-like 1	IGFBPL1	98.146	825000000	45	25.2912	27.1541	24.8026	25.8409	27.0754	26.9842
0.365656	0.527578	A0A286YEY1;P01876;A0A0G2JMB2;A0A286YEY5;P01877	A0A286YEY1;P01876;A0A0G2JMB2	Ig alpha-1 chain C region	IGHA1	15.905	155880000	23	24.3577	23.0639	24.9896	25.0679	24.5307	24.3953
0.0721324	0.101831	A0A0A0MS08;P01857;A0A0A0MS07	A0A0A0MS08;P01857;A0A0A0MS07	Ig gamma-1 chain C region	IGHG1	133.44	274140000	25	24.176	25.0476	25.8486	25.2333	25.2326	24.9118
0.806783	-0.334249	P01834	P01834	Ig kappa chain C region	IGKC	124.64	330570000	42	25.7405	25.4381	25.4766	25.4862	25.2531	24.9131
0.712697	-0.568408	P0DOY3;P0DOY2;A0A0B4J231;P0CG04;P0CF74;B9A064	P0DOY3;P0DOY2;A0A0B4J231;P0CG04;P0CF74;B9A064	Ig lambda-1 chain C regions;Ig lambda-6 chain C region;Immunoglobulin lambda-like polypeptide 5	IGLL5;IGLC1;IGLC6	16.301	32898000	18	22.7923	21.9277	22.873	22.3666	21.7958	21.7254
0.00170066	0.00354703	B4DY09;Q12905;X6R6Z1;A0A0A0MRL0	B4DY09;Q12905;X6R6Z1	Interleukin enhancer-binding factor 2	ILF2	48.969	39340000	16	22.6433	23.2215	21.5838	21.6789	22.4308	23.3496
0.0656733	-0.130809	Q12906-5;Q12906-4;Q12906-2;Q12906-6;Q12906-3;Q12906;Q12906-7;K7EKJ9;K7ERM6;K7ENK6;K7EM82;K7EJ09;K7ER69;Q96SI9-2;Q96SI9;K7EQ75;K7EQR9	Q12906-5;Q12906-4;Q12906-2;Q12906-6;Q12906-3;Q12906;Q12906-7;K7EKJ9	Interleukin enhancer-binding factor 3	ILF3	10.918	64059000	18	23.0668	22.8934	24.6004	24.0438	23.5529	22.5714
0.00905214	0.0986074	A6XGL2;P01308;C9JNR5;F8WCM5	A6XGL2;P01308;C9JNR5;F8WCM5	Insulin;Insulin B chain;Insulin A chain;Insulin, isoform 2	INS;INS-IGF2	4.6562	5521500000	13	30.5632	28.9493	22.145	29.5097	30.0929	22.3507
0.243024	0.376023	O00410;H0Y8C6;O00410-2;O00410-3;C9JZD8;E7EQT5;E7ETV3	O00410;H0Y8C6;O00410-2;O00410-3	Importin-5	IPO5	23.437	19535000	14	20.628	21.8741	21.9761	21.431	22.7295	21.4456
1.36733	1.04614	A0A0J9YXZ5;P46940	A0A0J9YXZ5;P46940	Ras GTPase-activating-like protein IQGAP1	IQGAP1	1.9938	4082900	0	22.2976	21.4239	22.5168	22.9866	23.0099	23.3802
0.257672	-0.681054	O14498;H0YN67;H0YL90	O14498;H0YN67;H0YL90	Immunoglobulin superfamily containing leucine-rich repeat protein	ISLR	23.994	28332000	9	22.4234	23.0377	23.0141	23.8036	20.251	22.3775
1.16313	-0.33257	B7ZKJ8;Q14624-3;Q14624-2;Q14624;H7C0L5;Q14624-4	B7ZKJ8;Q14624-3;Q14624-2;Q14624;H7C0L5;Q14624-4	Inter-alpha-trypsin inhibitor heavy chain H4;70 kDa inter-alpha-trypsin inhibitor heavy chain H4;35 kDa inter-alpha-trypsin inhibitor heavy chain H4	ITIH4	131.5	1436900000	72	27.8	27.8429	27.5835	27.4105	27.596	27.2223
0.066269	0.241341	Q08881	Q08881	Tyrosine-protein kinase ITK/TSK	ITK	1.9748	232120000	2	22.6866	23.5654	21.4456	22.3095	21.1813	24.9308
0.166075	0.219778	A0A3B3IUC0;Q9Y287	A0A3B3IUC0;Q9Y287	Integral membrane protein 2B;BRI2, membrane form;BRI2 intracellular domain;BRI2C, soluble form;Bri23 peptide	ITM2B	2.0971	0	1	21.5087	22.2068	21.6863	21.8084	21.3643	22.8885
0.187459	0.30833	Q07666-3;Q07666-2;Q07666	Q07666-3;Q07666-2;Q07666	KH domain-containing, RNA-binding, signal transduction-associated protein 1	KHDRBS1	30.043	24223000	8	22.1026	23.385	22.6073	22.7141	23.9917	22.314
0.169498	-0.519166	H7C4F6;O00629	H7C4F6;O00629	Importin subunit alpha-3	KPNA4	3.3331	7193700	5	21.5303	21.5475	23.3448	23.24	21.7946	19.8305
0.0629918	-0.0689487	Q14974;J3QR48;Q14974-2	Q14974;J3QR48	Importin subunit beta-1	KPNB1	15.546	72322000	18	23.9181	22.994	22.8349	23.4783	22.8717	23.1902
1.13884	0.755149	F8VZY9;P05783;CON__H-INV:HIT000015463	F8VZY9;P05783	Keratin, type I cytoskeletal 18	KRT18	13.755	74548000	19	21.7231	22.4987	22.519	23.0457	22.6897	23.2708
1.05072	-0.659132	P25391	P25391	Laminin subunit alpha-1	LAMA1	2.4504	13502000	5	22.5617	22.6627	23.4395	22.3761	22.0384	22.2721
0.426155	0.598859	G3XAI2;P07942;E7EPA6	G3XAI2;P07942	Laminin subunit beta-1	LAMB1	90.029	48287000	27	22.8952	22.0267	24.0133	23.5737	23.8769	23.2812
0.160993	-0.274004	P11047;Q9Y6N6	P11047	Laminin subunit gamma-1	LAMC1	3.7037	13552000	5	23.5809	22.233	22.4013	21.8246	22.1683	23.4003
0.0271089	0.0595512	F6S2S5;Q14847;Q14847-2;K7ESD6;C9J9W2;O76041-2	F6S2S5;Q14847;Q14847-2;K7ESD6;C9J9W2;O76041-2	LIM and SH3 domain protein 1	LASP1	9.055	27672000	18	22.2734	21.1074	22.9721	22.689	22.6601	21.1824
0.0714466	0.07794	P00338;P00338-3;P00338-4;P00338-5;P00338-2;F5GXY2;F5H5J4;F5H6W8;F5GXH2;F5GYU2;F5GZQ4;F5H8H6;F5GXC7;F5GWW2;F5GXU1	P00338;P00338-3;P00338-4;P00338-5;P00338-2;F5GXY2	L-lactate dehydrogenase A chain	LDHA	66.116	327230000	65	24.9146	24.9807	25.8044	25.5418	25.586	24.8057
0.319879	-0.467014	P07195;A0A3B3IS95;A8MW50;C9J7H8;F5H793;F5H5G7;F5H155;A0A087WUM2;G3XAP5;F5H245;Q6ZMR3;P07864	P07195;A0A3B3IS95;A8MW50	L-lactate dehydrogenase B chain;L-lactate dehydrogenase	LDHB	323.31	1872600000	100	27.6373	27.8894	29.4634	28.1158	27.9539	27.5193
0.797955	0.674926	P09382;F8WEI7	P09382	Galectin-1	LGALS1	6.0248	105080000	17	23.2007	23.0152	23.493	24.6416	23.5398	23.5523
4.04015	2.08711	Q08380;K7ESM3;K7EKQ5;K7EP36;K7EJY8;K7EQT9;K7ES75;K7EN99;K7ERZ6;K7EJD3	Q08380	Galectin-3-binding protein	LGALS3BP	81.349	675250000	56	24.1815	24.1308	24.0748	26.4491	26.1893	26.0099
0.240849	-0.597426	P49257	P49257	Protein ERGIC-53	LMAN1	1.9463	7842000	1	22.2002	21.1458	23.0887	20.0521	22.7917	21.7986
0.31629	0.406137	D6RBV2;Q12907;D6RDX1;D6RIU4;D6RBH1	D6RBV2;Q12907;D6RDX1;D6RIU4	Vesicular integral-membrane protein VIP36	LMAN2	16.583	58480000	10	22.5351	22.9192	23.1377	23.5467	23.9553	22.3084
0.151154	-0.419743	P02545-2;P02545-6;P02545-3;P02545;Q3BDU5;Q5TCI8;P02545-5;P02545-4;H0YAB0;A0A0C4DGC5	P02545-2;P02545-6;P02545-3;P02545;Q3BDU5;Q5TCI8;P02545-5;P02545-4	Prelamin-A/C;Lamin-A/C	LMNA	11.249	48294000	17	22.3968	22.0811	24.7626	23.6944	21.6243	22.6625
0.566581	-0.261729	P20700;E9PBF6;A0A0D9SFY5;A0A0D9SFE5	P20700;E9PBF6	Lamin-B1	LMNB1	26.035	135790000	28	24.0823	24.2587	24.6797	24.2711	24.0482	23.9163
0.0289449	-0.0470676	Q03252	Q03252	Lamin-B2	LMNB2	8.592	16582000	7	23.1483	21.9898	22.7667	21.9301	23.3894	22.4441
0.751424	-0.408397	B8ZZF8;Q9Y4Y9	B8ZZF8;Q9Y4Y9	U6 snRNA-associated Sm-like protein LSm5	LSM5	2.1247	14532000	7	22.5109	23.2506	22.6062	22.198	22.4704	22.4742
0.662662	-0.506596	P09960-3;P09960-2;P09960-4;P09960	P09960-3;P09960-2;P09960-4;P09960	Leukotriene A-4 hydrolase	LTA4H	7.2774	29498000	7	22.7273	23.2236	23.5412	23.0669	22.1959	22.7095
0.0840467	0.0406729	P51884;CON__Q05443	P51884	Lumican	LUM	323.31	10310000000	140	30.0966	30.4771	29.9805	30.3406	30.271	30.0646
0.110009	0.162549	P33908;P33908-2	P33908;P33908-2	Mannosyl-oligosaccharide 1,2-alpha-mannosidase IA	MAN1A1	113.88	257710000	42	25.015	24.8479	23.5568	24.7956	25.0046	24.1073
0.16143	0.563878	P46821;D6RA32;D6RA40	P46821;D6RA32	Microtubule-associated protein 1B;MAP1B heavy chain;MAP1 light chain LC1	MAP1B	141.24	175090000	61	21.7285	24.7699	26.1161	24.4133	24.8072	25.0855
0.328594	0.509819	F5H1X6;F5H4R1;J3KNB8;F5H538;Q9Y6R4-2;Q9Y6R4	F5H1X6;F5H4R1;J3KNB8;F5H538;Q9Y6R4-2;Q9Y6R4	Mitogen-activated protein kinase kinase kinase 4	MAP3K4	2.4837	66072000	6	22.203	22.8228	21.9206	22.0151	22.5112	23.9497
0.105787	-0.19333	Q15691	Q15691	Microtubule-associated protein RP/EB family member 1	MAPRE1	3.1259	11403000	3	22.4825	23.3097	22.7089	22.392	21.7283	23.8007
0.0440666	-0.102238	P29966	P29966	Myristoylated alanine-rich C-kinase substrate	MARCKS	246.8	264180000	46	24.1143	24.9391	26.4394	25.6071	25.3082	24.2708
0.181573	0.241109	P49006	P49006	MARCKS-related protein	MARCKSL1	16.152	11029000	1	22.637	21.6107	23.2859	22.6497	22.5905	23.0168
0.470186	-0.648684	P48740-4;P48740-2;F8W876;P48740-3;P48740	P48740-4;P48740-2;F8W876;P48740-3;P48740	Mannan-binding lectin serine protease 1;Mannan-binding lectin serine protease 1 heavy chain;Mannan-binding lectin serine protease 1 light chain	MASP1	11.891	18099000	8	23.1591	22.2141	23.5717	22.9543	21.4772	22.5674
0.225494	-0.356829	P40925;P40925-3;B9A041;P40925-2;B8ZZ51;C9JF79;C9JRL4;C9JLV6	P40925;P40925-3;B9A041;P40925-2;B8ZZ51;C9JF79	Malate dehydrogenase, cytoplasmic;Malate dehydrogenase	MDH1	25.818	197280000	32	24.0036	25.2134	25.8717	25.0377	24.8781	24.1024
0.16663	-0.322365	P40926-2;P40926;G3XAL0	P40926-2;P40926;G3XAL0	Malate dehydrogenase, mitochondrial;Malate dehydrogenase	MDH2	29.749	48333000	12	22.2302	23.6062	23.8947	23.8973	22.7337	22.1329
0.288548	-0.552688	E9PPJ5;E9PLM6;P21741-2;P21741	E9PPJ5;E9PLM6;P21741-2;P21741	Midkine	MDK	3.0402	7739200	5	22.0303	22.6239	21.2636	21.9952	22.1731	20.0915
0.340511	-0.234791	K7ES70;P55083;P55083-2	K7ES70;P55083;P55083-2	Microfibril-associated glycoprotein 4	MFAP4	95.262	1232000000	38	27.3503	27.7879	27.0555	27.404	27.2968	26.7884
0.0873929	-0.183926	P08493;P08493-2	P08493;P08493-2	Matrix Gla protein	MGP	22.253	181360000	10	22.7067	22.4397	23.0895	22.1925	21.5346	23.957
0.86824	1.53836	A0A0A0MTD5;Q8IYU8	A0A0A0MTD5;Q8IYU8	Calcium uptake protein 2, mitochondrial	MICU2	1.9093	318750000	7	22.6303	21.8373	22.0297	22.7731	23.0662	25.2731
0.353571	-0.305387	P14174	P14174	Macrophage migration inhibitory factor	MIF	84.964	998740000	37	26.6168	26.816	27.7065	26.9785	26.5331	26.7116
0.101022	0.0964158	P08253;P08253-3;P08253-2;H3BR66;H3BS34;H3BV48	P08253;P08253-3;P08253-2	72 kDa type IV collagenase;PEX	MMP2	65.037	443270000	45	26.1685	25.5307	25.2027	25.3451	25.9244	25.9217
0.305401	-0.635618	Q9UBG0	Q9UBG0	C-type mannose receptor 2	MRC2	4.0934	14557000	6	22.9053	21.1298	23.2834	21.6295	22.791	20.9911
0.164377	0.309553	P26038;V9GZ54	P26038	Moesin	MSN	55.22	63021000	18	21.6023	23.1495	23.9169	23.5429	22.857	23.1974
0.195574	-0.246384	J3KTJ1;J3QRS3;P24844-2;P19105;P24844;O14950	J3KTJ1;J3QRS3;P24844-2;P19105;P24844;O14950	Myosin regulatory light polypeptide 9;Myosin regulatory light chain 12A;Myosin regulatory light chain 12B	MYL12A;MYL9;MYL12B	15.934	7199500	9	23.408	22.036	22.2084	21.9265	22.3018	22.685
0.89408	1.72109	F8VPF3;F8W1R7;J3KND3;G8JLA2;G3V1V0;B7Z6Z4;P60660-2;P60660;F8VZU9;G3V1Y7;F8W1I5;F8W180;P14649	F8VPF3;F8W1R7;J3KND3;G8JLA2;G3V1V0;B7Z6Z4;P60660-2;P60660;F8VZU9;G3V1Y7;F8W1I5;F8W180;P14649	Myosin light polypeptide 6;Myosin light chain 6B	MYL6;MYL6B	39.627	103430000	12	20.6704	22.249	23.6352	23.4502	24.3792	23.8885
0.315682	0.484732	H3BML9;H3BN54;H3BPK4;Q96A32	H3BML9;H3BN54;H3BPK4;Q96A32	Myosin regulatory light chain 2, skeletal muscle isoform	MYLPF	3.726	829070	2	22.2341	21.0158	22.8095	22.0984	23.1783	22.237
0.0156561	-0.0572815	F8VZJ2;H0YHX9;Q13765;E9PAV3-2;E9PAV3	F8VZJ2;H0YHX9;Q13765;E9PAV3-2;E9PAV3	Nascent polypeptide-associated complex subunit alpha;Nascent polypeptide-associated complex subunit alpha, muscle-specific form	NACA	7.2955	15339000	6	21.7234	22.2383	22.8658	23.4635	23.3056	19.8865
1.13511	-0.982947	H0YH88;H0YHC3;F8W020;F8W118;F8VXI6;F8VUX1;F8VY35;F8VV59;F8W543;B7Z9C2;F8W0J6;F5H4R6;H0YIV4;P55209-3;P55209-2;P55209	H0YH88;H0YHC3;F8W020;F8W118;F8VXI6;F8VUX1;F8VY35;F8VV59;F8W543;B7Z9C2;F8W0J6;F5H4R6;H0YIV4;P55209-3;P55209-2;P55209	Nucleosome assembly protein 1-like 1	NAP1L1	3.0398	44758000	8	23.3944	22.9049	22.3006	21.3755	22.1983	22.0772
0.866887	-1.02677	A8MXH2;C9JZI7;Q99733;Q99733-2;E9PNW0;E9PJJ2;E9PS34;E9PNJ7;E9PKT8;C9J6D1;H0YCI4	A8MXH2;C9JZI7;Q99733;Q99733-2;E9PNW0;E9PJJ2;E9PS34;E9PNJ7;E9PKT8;C9J6D1;H0YCI4	Nucleosome assembly protein 1-like 4	NAP1L4	31.733	5250800	7	23.1115	22.3965	23.2632	22.5621	20.9604	22.1684
0.594643	-0.911516	P49321;P49321-3;E9PPR5;P49321-2;P49321-4;E9PPQ8;E9PI86;Q5T624;E9PNB5;H0YDS9;E9PRH9;H0YF33	P49321;P49321-3;E9PPR5;P49321-2;P49321-4	Nuclear autoantigenic sperm protein	NASP	4.6822	5620700	5	22.5726	23.1681	22.3675	20.7874	22.9864	21.5999
0.181546	0.133171	A0A087X1V2;A0A087WVU1;A0A0D9SF98;A0A087WWJ5;H7BYX6;A0A087WTE4;A0A087WTF6;A0A087WX77;A0A087WWD4;A0A087WV75;P13591-4;P13591-3;P13591-1;P13591;A0A0C4DGS4;P13591-5;A0A087WZS4	A0A087X1V2;A0A087WVU1;A0A0D9SF98;A0A087WWJ5;H7BYX6;A0A087WTE4;A0A087WTF6;A0A087WX77;A0A087WWD4;A0A087WV75;P13591-4;P13591-3;P13591-1;P13591;A0A0C4DGS4;P13591-5	Neural cell adhesion molecule 1	NCAM1	6.158	16875000	10	21.4752	22.4184	21.8544	21.9411	22.1048	22.1016
1.12656	1.31093	O14594	O14594	Neurocan core protein	NCAN	7.5012	78073000	13	21.6021	22.1297	21.6558	22.2337	23.0509	24.0357
0.0165456	0.0344944	P19338;H7BY16;C9JYW2;C9JLB1;C9J1H7;C9JWL1	P19338;H7BY16	Nucleolin	NCL	267.41	408070000	67	24.481	26.1018	25.5895	24.5062	25.545	26.2248
0.734686	-0.404514	F8W1A2;F8VVB6;Q99435-4;Q99435;Q99435-2;Q99435-3;F8VXR5;F8VRQ0;H0YIT4;F8VZ72	F8W1A2;F8VVB6;Q99435-4;Q99435;Q99435-2;Q99435-3	Protein kinase C-binding protein NELL2	NELL2	48.876	42659000	22	22.8825	23.3846	22.9971	22.4827	22.4814	23.0866
0.0582466	0.0869236	Q92859-3;Q92859-2;Q92859-4;Q92859;Q59FP8	Q92859-3;Q92859-2;Q92859-4;Q92859	Neogenin	NEO1	9.4672	7147700	8	21.267	21.1945	22.757	21.967	21.6708	21.8414
0.472789	-0.529418	P14543-2;P14543	P14543-2;P14543	Nidogen-1	NID1	10.624	13715000	4	22.2633	21.8929	22.2686	20.7106	22.2882	21.8377
0.365173	1.08137	Q14112-2;Q14112;A0A087WZP6;H0YJV3	Q14112-2;Q14112;A0A087WZP6	Nidogen-2	NID2	97.155	211870000	40	25.034	24.8486	21.295	24.7679	25.2124	24.4414
0.82159	-0.493408	Q32Q12;P22392;P22392-2;O60361	Q32Q12;P22392;P22392-2;O60361	Nucleoside diphosphate kinase;Nucleoside diphosphate kinase B;Putative nucleoside diphosphate kinase	NME1-NME2;NME2;NME2P1	4.2488	165290000	15	24.1847	24.779	25.1264	24.2732	24.1272	24.2094
0.384971	-0.644119	P15531;P15531-2;E7ERL0;J3KPD9;C9K028;F6XY72;E5RHP0	P15531;P15531-2;E7ERL0;J3KPD9	Nucleoside diphosphate kinase A	NME1;NME2	55.426	39306000	11	23.4917	22.6643	24.1978	23.5839	23.0866	21.7508
0.347691	-0.311953	H0YIZ1;P61916;J3KMY5;G3V3E8;E7EMS2;G3V3D1;G3V2V8;P61916-2	H0YIZ1;P61916;J3KMY5;G3V3E8;E7EMS2;G3V3D1;G3V2V8;P61916-2	Epididymal secretory protein E1	NPC2	12.163	213900000	21	25.6075	24.9141	24.6183	25.0952	24.8	24.309
0.0215218	-0.0231209	E9PLK3;P55786-2;P55786;A6NEC2;E9PJY4;E9PJ74;E9PPD4;H0YDG0;E9PRQ5;E9PP11;A6NEC2-3;A6NEC2-2	E9PLK3;P55786-2;P55786;A6NEC2	Puromycin-sensitive aminopeptidase;Puromycin-sensitive aminopeptidase-like protein	NPEPPS;NPEPPSL1	4.5683	14061000	4	22.2361	22.2827	22.8286	21.825	22.6504	22.8026
0.0236177	-0.0210787	P06748-2;P06748;P06748-3;E5RI98;E5RGW4	P06748-2;P06748;P06748-3	Nucleophosmin	NPM1	110.78	550990000	58	25.8136	26.2131	26.623	25.8919	26.5322	26.1623
0.40281	-0.695963	D6RH31;Q6UXI9-2;Q6UXI9-5;Q6UXI9;Q6UXI9-4;Q6UXI9-6;Q6UXI9-3	D6RH31;Q6UXI9-2;Q6UXI9-5;Q6UXI9;Q6UXI9-4;Q6UXI9-6;Q6UXI9-3	Nephronectin	NPNT	5.1815	22347000	3	23.1231	22.8917	23.0259	23.7583	21.4047	21.7898
0.929183	-0.833792	C9JYY6;F8W775;Q92823-3;Q92823-4;Q92823-6;Q92823-2;Q92823;Q92823-5;A0A087X2B3	C9JYY6;F8W775;Q92823-3;Q92823-4;Q92823-6;Q92823-2;Q92823;Q92823-5;A0A087X2B3	Neuronal cell adhesion molecule	NRCAM	4.3052	3508000	2	22.9868	22.5372	22.367	22.4933	21.6953	21.2011
0.726233	-1.04972	Q9UNZ2-6;Q9UNZ2;Q9UNZ2-5;F2Z2K0;Q9UNZ2-4	Q9UNZ2-6;Q9UNZ2;Q9UNZ2-5;F2Z2K0;Q9UNZ2-4	NSFL1 cofactor p47	NSFL1C	2.3588	6437700	3	22.7435	22.5836	22.9793	22.6581	22.0323	20.4669
0.271271	0.294683	Q02818;H7BZI1;C9JKZ2;C9JBD3;C9J3C1	Q02818;H7BZI1;C9JKZ2	Nucleobindin-1	NUCB1	7.065	99043000	15	23.0258	23.8894	24.35	24.3148	24.1694	23.665
0.905681	-0.954758	Q9H1E3;Q9H1E3-2	Q9H1E3;Q9H1E3-2	Nuclear ubiquitous casein and cyclin-dependent kinase substrate 1	NUCKS1	79.643	18094000	9	22.2012	22.3144	23.1305	21.3134	22.3744	21.094
0.0971746	0.222671	Q9Y266	Q9Y266	Nuclear migration protein nudC	NUDC	2.6666	24102000	5	23.2157	22.6903	21.7942	23.4066	23.584	21.3776
0.420895	-1.11508	O43809	O43809	Cleavage and polyadenylation specificity factor subunit 5	NUDT21	7.3001	6333600	7	21.4314	24.1313	21.6149	21.841	22.1416	19.8498
0.184945	0.387393	A6NFX8;Q9UKK9;A6NCQ0;A6NJU6;H0YEY4;C9JYY9	A6NFX8;Q9UKK9;A6NCQ0;A6NJU6	ADP-sugar pyrophosphatase	NUDT5	7.9411	24414000	7	20.7391	22.1943	23.494	22.4005	22.5301	22.6589
0.0501691	-0.0616678	P61970;H3BRV9	P61970;H3BRV9	Nuclear transport factor 2	NUTF2	12.325	264780000	25	24.351	25.2354	25.629	25.0382	25.3208	24.6714
0.169135	-0.447599	A0A0G2JQK5;Q6DKJ4	A0A0G2JQK5;Q6DKJ4	Nucleoredoxin	NXN	2.1161	3172100	1	20.3847	22.0061	22.8423	19.9144	22.0306	21.9452
0.211072	-0.135904	Q86UD1;E9PJ29	Q86UD1;E9PJ29	Out at first protein homolog	OAF	4.1541	40795000	3	21.5804	22.3101	22.1593	22.0223	21.9632	21.6566
0.0354429	0.119749	P20774;Q5TBF5	P20774;Q5TBF5	Mimecan	OGN	104.23	318410000	34	22.9286	25.646	22.144	24.1099	24.1276	22.8403
0.288321	-0.297483	Q9NRN5;Q9NRN5-2;B4DNG0;Q9NRN5-3	Q9NRN5;Q9NRN5-2;B4DNG0	Olfactomedin-like protein 3	OLFML3	7.2915	50774000	11	23.7933	22.6566	23.1234	23.2706	22.4082	23.0022
0.0338215	-0.039018	H7BZ94;P07237;I3L398;H0Y3Z3;I3L4M2;I3NI03;I3L3U6;I3L312;I3L514;I3L0S0;I3L1Y5;I3L3P5	H7BZ94;P07237;I3L398;H0Y3Z3	Protein disulfide-isomerase	P4HB	75.293	118050000	36	23.7388	23.3684	24.2241	23.1492	23.9254	24.1397
0.0717391	0.0860291	J3KNE3;P68402	J3KNE3;P68402	Platelet-activating factor acetylhydrolase IB subunit beta	PAFAH1B2	3.2363	22849000	9	22.3296	22.34	21.4623	22.3584	21.5295	22.5021
0.532973	-1.8182	E9PBS1;P22234;P22234-2;D6RF62	E9PBS1;P22234;P22234-2;D6RF62	Multifunctional protein ADE2;Phosphoribosylaminoimidazole-succinocarboxamide synthase;Phosphoribosylaminoimidazole carboxylase	PAICS	2.9452	1445600	8	24.6143	22.7304	22.5467	22.8585	22.8002	18.7782
0.057115	-0.127544	K7ELW0;Q99497;K7EN27	K7ELW0;Q99497;K7EN27	Protein deglycase DJ-1	PARK7	55.818	230570000	43	23.9448	24.7258	26.2488	24.984	25.4088	24.144
2.07053	0.911556	Q15365;F8VTZ0;F8W0G4;F8VXH9;F8W1G6;H3BRU6;F8VZX2;J3QT27;E9PFP8;Q15366-7;Q15366-8;Q15366-4;Q15366-5;P57721-2;P57721-3;P57721-5;Q15366-6;Q15366-3;Q15366;Q15366-2;P57721-4;P57721	Q15365	Poly(rC)-binding protein 1	PCBP1	16.017	33172000	3	21.597	21.6559	21.7212	22.5011	22.9197	22.288
0.256081	-0.266418	P12004	P12004	Proliferating cell nuclear antigen	PCNA	4.6306	0	3	22.2073	22.0858	22.9629	22.136	22.6962	21.6246
0.537585	0.597377	Q15113	Q15113	Procollagen C-endopeptidase enhancer 1	PCOLCE	33.78	54661000	6	22.8033	22.6983	22.1283	22.3202	23.2606	23.8413
0.813189	0.969578	Q9UHG2;Q9NPY3	Q9UHG2	ProSAAS;KEP;Big SAAS;Little SAAS;Big PEN-LEN;PEN;Little LEN;Big LEN	PCSK1N	57.666	40162000	13	22.1715	23.2006	22.3239	24.355	23.4422	22.8076
0.669439	0.816314	K7EQA1;O14737;O14737-2	K7EQA1;O14737;O14737-2	Programmed cell death protein 5	PDCD5	10.461	147260000	8	22.7339	22.1121	23.4145	24.3274	23.4425	22.9396
0.0312276	0.0329564	H7BZJ3	H7BZJ3		PDIA3	2.4476	33412000	2	21.7355	21.5047	22.6129	22.0606	21.7637	22.1276
0.36588	0.273213	P30101	P30101	Protein disulfide-isomerase A3	PDIA3	13.659	120780000	25	23.6466	23.4799	23.9993	24.499	23.8684	23.578
0.0851207	-0.0932802	P13667	P13667	Protein disulfide-isomerase A4	PDIA4	11.471	41359000	10	22.6448	22.4031	23.0864	21.9601	22.8591	23.0353
0.0712776	0.132209	Q15084-3;Q15084;Q15084-4;Q15084-5;Q15084-2	Q15084-3;Q15084;Q15084-4;Q15084-5;Q15084-2	Protein disulfide-isomerase A6	PDIA6	27.216	76261000	27	21.7812	23.7065	23.4162	22.6056	23.416	23.2789
2.32514	1.00258	B1AKZ5;Q15121	B1AKZ5;Q15121	Astrocytic phosphoprotein PEA-15	PEA15	48.183	12115000	5	21.8801	21.6659	21.484	22.6643	22.9188	22.4547
0.00241399	-0.00341733	P30086	P30086	Phosphatidylethanolamine-binding protein 1;Hippocampal cholinergic neurostimulating peptide	PEBP1	126.77	746390000	50	25.6434	26.4062	27.2432	26.4208	26.3979	26.4638
0.0165288	-0.0155379	Q99471-2;Q99471;F8VNW6;F8VQZ2;H3BMQ1;H3BPF6;Q99471-3	Q99471-2;Q99471;F8VNW6;F8VQZ2;H3BMQ1;H3BPF6;Q99471-3	Prefoldin subunit 5	PFDN5	11.709	16025000	8	22.1465	22.3903	22.6051	22.0835	22.9298	22.082
0.10561	-0.0874774	P07737;K7EJ44;CON__P02584;I3L3D5	P07737;K7EJ44	Profilin-1	PFN1	94.365	879020000	57	26.937	26.632	26.7826	26.8376	27.1046	26.1469
0.845348	-1.04805	C9JQ45;G5E9Q6;P35080-2;P35080;C9J712;C9J0J7;C9J2N0	C9JQ45;G5E9Q6;P35080-2;P35080;C9J712;C9J0J7;C9J2N0	Profilin;Profilin-2	PFN2	7.2992	38334000	8	22.616	22.4826	23.0382	20.8662	21.4057	22.7208
0.0344818	-0.119377	P18669;Q8N0Y7;P15259	P18669;Q8N0Y7	Phosphoglycerate mutase 1;Probable phosphoglycerate mutase 4	PGAM1;PGAM4	51.816	159600000	13	21.8381	24.7502	24.7617	24.4499	22.3716	24.1703
0.0932683	-0.140509	P52209-2;P52209;K7ELN9;K7EPF6;K7EMN2;K7EM49	P52209-2;P52209;K7ELN9	6-phosphogluconate dehydrogenase, decarboxylating	PGD	76.518	118610000	39	23.0972	24.4731	24.0125	23.6294	23.1572	24.3746
0.853976	0.569893	P00558;P00558-2;P07205	P00558;P00558-2	Phosphoglycerate kinase 1	PGK1	175.46	1021000000	85	26.6315	26.2287	26.2024	26.3722	27.1525	27.2475
0.26664	-0.988298	P36871-3;P36871;P36871-2	P36871-3;P36871;P36871-2	Phosphoglucomutase-1	PGM1	2.6937	4244200	3	22.293	22.5289	23.1162	21.9807	24.0114	18.9811
0.695055	1.23645	Q96G03	Q96G03	Phosphoglucomutase-2	PGM2	2.2039	499390	1	21.3478	22.3487	19.8443	21.7243	22.9114	22.6144
0.0204818	-0.0427736	C9JW96;P35232;C9JZ20;E7ESE2;E9PCW0	C9JW96;P35232;C9JZ20;E7ESE2;E9PCW0	Prohibitin	PHB	3.0945	0	2	23.4059	22.3208	21.1338	22.6041	22.317	21.8112
1.02107	1.14335	A0A286YF22;A0A2C9F2M7;O43175;A0A286YFL2;A0A286YFA2;A0A286YER3;A0A286YFC8;A0A286YFB2;A0A286YFM8;A0A286YF34;A0A286YFF3;A0A286YFK5	A0A286YF22;A0A2C9F2M7;O43175;A0A286YFL2;A0A286YFA2;A0A286YER3;A0A286YFC8;A0A286YFB2;A0A286YFM8	D-3-phosphoglycerate dehydrogenase	PHGDH	4.671	34834000	8	22.8623	21.3376	22.0554	23.6973	23.2806	22.7074
0.118241	0.124887	Q9NRX4-2;Q9NRX4	Q9NRX4-2;Q9NRX4	14 kDa phosphohistidine phosphatase	PHPT1	15.509	63002000	13	22.2594	23.1885	23.4045	23.3692	22.8348	23.0231
0.790547	0.884478	B3KYB6;B3KYB7;A0A0A0MSW4;P48739;P48739-2;P48739-3	B3KYB6;B3KYB7;A0A0A0MSW4;P48739;P48739-2;P48739-3	Phosphatidylinositol transfer protein beta isoform	PITPNB	4.296	0	2	21.8818	21.1597	21.8819	21.625	22.8415	23.1105
0.053422	0.0488199	P14618;P14618-3;P14618-2;H3BTN5;B4DNK4;H3BQ34;H3BR70;H3BT25;H3BUW1;H3BTJ2;P30613-2;P30613	P14618;P14618-3;P14618-2;H3BTN5;B4DNK4;H3BQ34;H3BR70	Pyruvate kinase PKM;Pyruvate kinase	PKM	150.21	681430000	58	26.4475	25.8971	26.9199	26.2923	26.4524	26.6661
0.721594	-1.30961	K7ERZ3;O60664-2;O60664-4;O60664-3;O60664	K7ERZ3;O60664-2;O60664-4;O60664-3;O60664	Perilipin-3	PLIN3	3.8004	3406900	3	23.4162	23.1103	23.0991	20.2643	22.8939	22.5386
0.208853	0.376321	Q02809;Q02809-2	Q02809;Q02809-2	Procollagen-lysine,2-oxoglutarate 5-dioxygenase 1	PLOD1	5.2031	23593000	10	23.0598	22.1475	22.1646	23.6722	21.6017	23.227
0.769603	-0.864091	H7C4N2;A0A0A0MSQ0;P13797-3;P13797-2;P13797	H7C4N2;A0A0A0MSQ0;P13797-3;P13797-2;P13797	Plastin-3	PLS3	4.696	9089700	5	22.9079	22.3001	22.9867	22.3243	22.3491	20.929
0.543595	-0.830086	P55058;P55058-3;P55058-2;P55058-4	P55058;P55058-3;P55058-2;P55058-4	Phospholipid transfer protein	PLTP	54.546	232730000	33	24.3624	25.2537	24.9295	24.8226	24.4394	22.7934
0.0813672	-0.0819537	Q6UX71-2;Q6UX71	Q6UX71-2;Q6UX71	Plexin domain-containing protein 2	PLXDC2	12.868	0	2	21.3365	21.8197	22.3983	21.9508	21.4095	21.9484
0.780961	0.3625	E2PU09;O15031	E2PU09;O15031	Plexin-B2	PLXNB2	3.5113	0	2	22.2842	21.7644	21.7041	22.2568	22.1038	22.4796
0.241646	0.409901	O00592-2;O00592	O00592-2;O00592	Podocalyxin	PODXL	6.277	40067000	3	23.564	21.2931	22.2418	22.7727	22.5723	22.9836
1.2485	1.98641	Q15063-5	Q15063-5	Periostin	POSTN	2.5535	191170000	5	21.1615	22.4339	22.118	23.1388	23.3665	25.1673
0.731848	0.789456	Q15181;Q5SQT6	Q15181	Inorganic pyrophosphatase	PPA1	5.4305	12567000	6	20.8893	22.2977	21.655	22.9472	22.0138	22.2494
0.171174	0.180104	P62937;F8WE65;C9J5S7;P62937-2;P0DN26;A0A0H2UH34;A0A0B4J2A2;A0A075B767;A0A075B759;Q9Y536;F5H284;E5RIZ5;P0DN37	P62937;F8WE65;C9J5S7;P62937-2	Peptidyl-prolyl cis-trans isomerase A;Peptidyl-prolyl cis-trans isomerase A, N-terminally processed;Peptidyl-prolyl cis-trans isomerase	PPIA	256.81	1752900000	96	26.9384	27.6601	26.7709	26.8579	27.2051	27.8467
2.00708	1.10283	P23284	P23284	Peptidyl-prolyl cis-trans isomerase B	PPIB	9.204	123730000	18	23.5413	23.5158	23.3807	24.3281	25.0478	24.3705
0.0272157	-0.101568	P45877	P45877	Peptidyl-prolyl cis-trans isomerase C	PPIC	2.1535	11581000	5	20.5822	22.3765	22.7027	22.62	23.0652	19.6715
0.504038	-0.320633	F8WE71;C9J9S3;C9JP48;A0A087WYY5;F5H1L6;E7ETD8;F5H037;E9PMD7;F8VR82;F8VYE8;F8W0W8;P36873;P62140;P62136;P36873-2;P62136-2	F8WE71;C9J9S3;C9JP48;A0A087WYY5;F5H1L6;E7ETD8;F5H037;E9PMD7;F8VR82;F8VYE8;F8W0W8;P36873;P62140;P62136;P36873-2;P62136-2	Serine/threonine-protein phosphatase;Serine/threonine-protein phosphatase PP1-gamma catalytic subunit;Serine/threonine-protein phosphatase PP1-beta catalytic subunit;Serine/threonine-protein phosphatase PP1-alpha catalytic subunit	PPP1CB;PPP1CC;PPP1CA	4.6318	27428000	7	22.3994	22.1319	22.5821	22.4406	21.597	22.1138
0.300224	-0.321833	P30153;B3KQV6;C9J9C1;E9PH38	P30153;B3KQV6	Serine/threonine-protein phosphatase 2A 65 kDa regulatory subunit A alpha isoform	PPP2R1A	7.5217	47826000	10	23.6106	22.9609	22.1687	22.3985	22.5484	22.8278
0.789987	1.19342	A8MU39;H0YDU8;P53041	A8MU39;H0YDU8;P53041	Serine/threonine-protein phosphatase;Serine/threonine-protein phosphatase 5	PPP5C	2.62	2487200	2	21.7563	21.4628	22.1606	24.2444	21.9709	22.7447
0.235723	-0.335508	Q06830;A0A0A0MSI0;A0A0A0MRQ5;H7C3T4;Q13162	Q06830;A0A0A0MSI0;A0A0A0MRQ5	Peroxiredoxin-1	PRDX1	61.183	974660000	62	26.4611	27.3619	28.1281	27.4047	27.1	26.4397
0.00835803	0.00758934	P32119;A6NIW5;P32119-2	P32119;A6NIW5	Peroxiredoxin-2	PRDX2	24.323	594750000	35	26.3241	26.2005	26.9726	26.286	26.3742	26.8597
0.570485	0.2845	P30048-2;P30048	P30048-2;P30048	Thioredoxin-dependent peroxide reductase, mitochondrial	PRDX3	2.849	39128000	6	22.8578	22.7829	22.9564	23.1201	22.792	23.5385
0.660837	0.897715	P30044-2;P30044-3;P30044;P30044-4	P30044-2;P30044-3;P30044;P30044-4	Peroxiredoxin-5, mitochondrial	PRDX5	27.983	58340000	13	22.0286	23.4169	21.374	23.4116	23.1157	22.9853
0.128252	0.163061	P30041	P30041	Peroxiredoxin-6	PRDX6	7.5234	47854000	9	21.5974	22.6011	21.8398	21.5449	22.774	22.2085
0.994954	1.19898	K7EPW7;K7ELL7;P14314-2;P14314;K7EIP3;K7EKX1;K7EJ70	K7EPW7;K7ELL7;P14314-2;P14314	Glucosidase 2 subunit beta	PRKCSH	5.2764	0	3	21.9228	20.8182	21.9228	22.6644	23.5368	22.0596
1.56027	-0.687719	C9JIZ6;P07602;P07602-2;P07602-3;A0A0J9YXB8;Q5BJH1	C9JIZ6;P07602;P07602-2;P07602-3	Prosaposin;Saposin-A;Saposin-B-Val;Saposin-B;Saposin-C;Saposin-D	PSAP	29.263	328420000	32	26.328	26.0214	25.7042	25.2792	25.5112	25.2001
0.077231	0.156044	Q9Y617;Q9Y617-2	Q9Y617;Q9Y617-2	Phosphoserine aminotransferase	PSAT1	6.9059	15686000	6	21.2122	23.4475	21.6444	22.3341	22.5469	21.8912
0.427514	-0.938776	O75475-3;O75475-2;O75475	O75475-3;O75475-2;O75475	PC4 and SFRS1-interacting protein	PSIP1	2.4139	11607000	6	23.2353	23.602	21.4036	22.6995	22.1738	20.5513
0.130682	-0.252416	A0A024RA52;P25787;H7C402;H3BT36;C9JCK5	A0A024RA52;P25787;H7C402;H3BT36;C9JCK5	Proteasome subunit alpha type;Proteasome subunit alpha type-2	PSMA2	9.7139	30454000	3	22.6529	22.2676	24.4517	22.6922	22.6023	23.3205
1.75054	-1.38118	P25788-2;P25788;G3V3W4;G3V5N4;G3V4X5	P25788-2;P25788	Proteasome subunit alpha type-3	PSMA3	5.1663	25150000	8	22.9498	22.2582	23.309	21.1106	21.6901	21.5727
0.408048	-0.600321	P28066;P28066-2	P28066;P28066-2	Proteasome subunit alpha type-5	PSMA5	31.682	30003000	3	22.6366	21.741	22.9555	20.8731	22.5867	22.0724
0.0442358	0.168029	O14818;H0Y586;O14818-4;O14818-2;Q8TAA3-2;Q8TAA3-5;Q8TAA3;F5GY34;A0A087WYS6	O14818;H0Y586;O14818-4;O14818-2;Q8TAA3-2;Q8TAA3-5;Q8TAA3	Proteasome subunit alpha type-7;Proteasome subunit alpha type-7-like	PSMA7;PSMA8	6.4618	83055000	6	21.632	21.6412	24.7693	22.0774	22.0825	24.3867
0.638369	0.603907	P20618	P20618	Proteasome subunit beta type-1	PSMB1	2.6556	3478500	6	22.2488	21.7218	21.7717	21.8287	22.5379	23.1872
1.15724	-1.79687	P28070	P28070	Proteasome subunit beta type-4	PSMB4	2.8805	9053300	5	23.2658	21.7814	22.5889	21.444	21.2281	19.5735
1.45502	-0.810824	Q99436	Q99436	Proteasome subunit beta type-7	PSMB7	3.3041	38890000	10	23.5662	22.7186	23.3909	22.3835	22.4281	22.4316
0.963509	-2.25348	Q13200;F8WBS8;C9JPC0;Q13200-2;Q13200-3	Q13200;F8WBS8;C9JPC0;Q13200-2;Q13200-3	26S proteasome non-ATPase regulatory subunit 2	PSMD2	4.02	2252400	2	23.9389	23.0102	24.08	22.4475	22.4833	19.3378
0.247586	-0.534251	Q06323;H0YKK6;Q06323-3;Q06323-2	Q06323;H0YKK6;Q06323-3;Q06323-2	Proteasome activator complex subunit 1	PSME1	2.0029	15218000	5	23.1181	21.9905	24.1826	23.1818	21.4175	23.0892
1.81301	-0.880229	H0YM70;A0A087X1Z3;Q9UL46;H0YKU2	H0YM70;A0A087X1Z3;Q9UL46	Proteasome activator complex subunit 2	PSME2	9.3247	12303000	3	22.7209	23.0919	23.2942	22.3868	22.1682	21.9113
0.190953	-0.810024	K7ES59;K7EKJ7;A6NLN1;A0A0U1RRM4;P26599;P26599-2;P26599-3;K7ELW5	K7ES59;K7EKJ7;A6NLN1;A0A0U1RRM4;P26599;P26599-2;P26599-3;K7ELW5	Polypyrimidine tract-binding protein 1	PTBP1	30.133	192440000	23	22.2753	24.4717	25.6555	24.5244	24.6978	20.7502
1.09691	-0.849731	Q13308-5;Q13308-4;Q13308;Q13308-6;H7C5L0;Q13308-2;Q86X91;Q13308-3	Q13308-5;Q13308-4;Q13308;Q13308-6;H7C5L0;Q13308-2	Inactive tyrosine-protein kinase 7	PTK7	6.9721	24269000	5	22.4431	23.287	22.5114	22.0704	22.2057	21.4162
1.07335	-2.0381	B8ZZQ6;P06454-2;P06454	B8ZZQ6;P06454-2;P06454	Prothymosin alpha;Prothymosin alpha, N-terminally processed;Thymosin alpha-1	PTMA	55.868	96520000	8	22.8452	25.1634	22.976	21.9274	22.2618	20.6812
0.0653514	-0.108025	F5H7R9;F5GXR3;P20962	F5H7R9;F5GXR3;P20962	Parathymosin	PTMS	5.2657	21233000	8	22.5295	24.1227	22.828	22.4486	23.2909	23.4166
0.306999	0.620004	C9JR52;P21246	C9JR52;P21246	Pleiotrophin	PTN	3.6593	56852000	7	21.2777	22.928	24.0692	23.4054	23.6135	23.1161
0.194478	0.296931	P23471-3;P23471-2;P23471	P23471-3;P23471-2;P23471	Receptor-type tyrosine-protein phosphatase zeta	PTPRZ1	5.1336	71898000	9	22.9724	23.6651	21.7319	22.8897	23.3896	22.9808
0.756308	-0.930642	Q92626	Q92626	Peroxidasin homolog	PXDN	19.562	46447000	11	23.7058	22.4297	22.0701	21.5249	21.5414	22.3473
0.0484058	0.0630894	A0A0U1RQC3;F2Z2V6;A0A0U1RQM8;A0A0U1RQU2;A0A0U1RRI9;A0A0U1RQE9;C9J165;A0A0U1RQT0;P47897-2;P47897	A0A0U1RQC3;F2Z2V6;A0A0U1RQM8;A0A0U1RQU2;A0A0U1RRI9;A0A0U1RQE9;C9J165;A0A0U1RQT0;P47897-2;P47897	Glutamine--tRNA ligase	QARS	2.6508	0	1	23.1721	21.9418	22.7026	22.4363	23.2006	22.369
0.697435	-0.30007	O00391-2;O00391;A8MXT8	O00391-2;O00391	Sulfhydryl oxidase 1	QSOX1	7.6923	36827000	15	22.0745	22.2198	22.1992	22.1603	21.5079	21.9251
0.500792	0.405812	B5MDF5;J3KQE5;P62826;F5H018;H0YFC6;B4DV51	B5MDF5;J3KQE5;P62826;F5H018;H0YFC6	GTP-binding nuclear protein Ran	RAN	5.6452	151970000	21	23.8523	24.06	24.7009	24.8825	24.8274	24.1208
0.0455864	-0.100541	C9JXG8;C9JGV6;F6WQW2;P43487-2;P43487	C9JXG8;C9JGV6;F6WQW2;P43487-2;P43487	Ran-specific GTPase-activating protein	RANBP1	2.8385	9066300	1	21.6653	21.7218	22.2286	22.5094	22.4981	20.3066
0.810771	-0.970325	P61224-2;P61224-3;P62834;P61224;A6NIZ1;F8WBC0;F5H4H0;F5GYH7;F5H077;F5GWU8;F5H491;F5H0B7;F5H500;F5H823;B7ZB78;F5GZG1;F5H6R7;F5H004;A0A075B6Q0;F5GYB5;F5GX62;E7ESV4;F5H7Y6;P61224-4	P61224-2;P61224-3;P62834;P61224;A6NIZ1;F8WBC0;F5H4H0;F5GYH7;F5H077;F5GWU8;F5H491;F5H0B7;F5H500;F5H823;B7ZB78;F5GZG1;F5H6R7;F5H004;A0A075B6Q0;F5GYB5;F5GX62;E7ESV4;F5H7Y6;P61224-4	Ras-related protein Rap-1b;Ras-related protein Rap-1A;Ras-related protein Rap-1b-like protein	RAP1B;RAP1A	18.986	18378000	9	22.7618	23.5421	22.401	22.6906	21.1678	21.9355
0.529056	-0.444239	A0A0A0MTB9;H0YAK8;A0A0A0MQT0;P09455;P09455-2;P09455-3	A0A0A0MTB9;H0YAK8;A0A0A0MQT0;P09455;P09455-2;P09455-3	Retinol-binding protein 1	RBP1	3.8794	100420000	5	22.4192	22.4141	23.4147	22.2502	22.6077	22.0574
0.492263	0.538703	Q5VY30;P02753	Q5VY30;P02753	Retinol-binding protein 4;Plasma retinol-binding protein(1-182);Plasma retinol-binding protein(1-181);Plasma retinol-binding protein(1-179);Plasma retinol-binding protein(1-176)	RBP4	14.579	64385000	9	22.4908	22.2042	23.1578	23.8133	23.1734	22.4822
0.477262	0.829933	E9PP27;Q15293-2;Q15293	E9PP27;Q15293-2;Q15293	Reticulocalbin-1	RCN1	15.313	21440000	9	22.3218	21.3285	19.9488	22.6099	21.5494	21.9296
0.819484	-1.36485	A0A2R8Y5S7;P35241;P35241-5;A0A2R8Y7M3;P35241-4;P35241-3;P35241-2;A0A2R8Y4H6	A0A2R8Y5S7;P35241;P35241-5;A0A2R8Y7M3;P35241-4	Radixin	RDX	5.1607	15960000	7	23.3962	21.2635	23.0619	21.7549	20.4404	21.4318
0.365294	-0.368929	J3KQ66;P78509-3;P78509-2;P78509	J3KQ66;P78509-3;P78509-2;P78509	Reelin	RELN	5.3295	11797000	3	21.9417	22.7152	22.2361	22.1286	22.4218	21.2359
0.265607	-0.730963	C9JRM1;C9JNR4;C9JX21;P61586	C9JRM1;C9JNR4;C9JX21;P61586	Transforming protein RhoA	RHOA	4.5196	5373800	6	22.8106	21.6499	22.6084	22.5952	22.7329	19.548
0.472022	-1.45283	Q6F5E8-2;Q6F5E8	Q6F5E8-2;Q6F5E8	Leucine-rich repeat-containing protein 16C	RLTPR	1.7826	47102000	2	25.9608	22.7174	21.6662	22.6407	21.7869	21.5583
0.446557	0.594695	P62906	P62906	60S ribosomal protein L10a	RPL10A	4.0423	43675000	12	21.854	21.6896	23.0136	22.9275	22.0387	23.3752
0.145501	-0.437685	Q5VVC8;P62913-2;P62913	Q5VVC8;P62913-2;P62913	60S ribosomal protein L11	RPL11	1.8659	3624100	0	21.7467	21.2315	22.2632	21.2648	23.1973	19.4663
0.0194824	0.0532074	P30050-2;P30050	P30050-2;P30050	60S ribosomal protein L12	RPL12	1.8262	10137000	1	23.3379	21.4646	21.8607	21.3434	23.6639	21.8154
0.37178	-0.612922	J3KRB3;A0A087WWH0;J3QS96;A0A087WXM6;J3QQT2;J3QLC8;J3KRX5;A0A0A0MRF8;A0A0A6YYL6;P18621-2;P18621;P18621-3;A0A087WY81	J3KRB3;A0A087WWH0;J3QS96;A0A087WXM6;J3QQT2;J3QLC8;J3KRX5;A0A0A0MRF8;A0A0A6YYL6;P18621-2;P18621;P18621-3;A0A087WY81	60S ribosomal protein L17	RPL17;RPL17-C18orf32	3.2745	7648900	4	22.3353	23.0551	22.725	23.368	21.7364	21.1722
0.0988477	0.296433	F8VUA6;G3V203;H0YHA7;J3QQ67;Q07020-2;Q07020	F8VUA6;G3V203;H0YHA7;J3QQ67;Q07020-2;Q07020	60S ribosomal protein L18	RPL18	2.3717	3695700	1	20.6632	22.296	23.3402	23.3159	22.9432	20.9296
0.384678	-0.564157	C9JXB8;C9JNW5;P83731	C9JXB8;C9JNW5;P83731	60S ribosomal protein L24	RPL24	2.3859	5565200	1	23.2721	22.0669	21.1852	21.849	21.5429	21.4398
0.435151	-0.534987	A0A3B3ITT5;P47914	A0A3B3ITT5;P47914	60S ribosomal protein L29	RPL29	2.1823	10783000	5	22.6578	22.4421	23.6987	22.5707	21.713	22.9099
0.533408	0.417771	G5E9G0;P39023;B5MCW2	G5E9G0;P39023;B5MCW2	60S ribosomal protein L3	RPL3	2.1365	16575000	2	22.6234	22.3998	22.0735	22.1991	22.9173	23.2336
0.154924	-0.541973	Q02878	Q02878	60S ribosomal protein L6	RPL6	8.7655	952790	3	21.9168	22.044	23.63	22.4933	23.7441	19.7274
0.310451	0.222652	F8VS58;F8VQY6;F8VRK7;G3V210;F8VZS0;F8VU65;F8VWS0;P05388-2;Q8NHW5;P05388;F8VWV4;F8VPE8;F8VW21	F8VS58;F8VQY6;F8VRK7;G3V210;F8VZS0;F8VU65;F8VWS0;P05388-2;Q8NHW5;P05388;F8VWV4;F8VPE8;F8VW21	60S acidic ribosomal protein P0;60S acidic ribosomal protein P0-like	RPLP0;RPLP0P6	8.2011	30950000	18	21.405	22.0365	22.1345	21.9398	21.86	22.4442
0.0319489	-0.0791232	P05386	P05386	60S acidic ribosomal protein P1	RPLP1	27.69	127070000	11	23.9833	22.6064	25.2578	24.3938	23.25	23.9664
0.0804643	0.246361	P05387;H0YDD8	P05387	60S acidic ribosomal protein P2	RPLP2	6.3951	192940000	17	22.345	24.9509	25.8106	24.0837	25.071	24.6909
0.128673	0.142106	P25398	P25398	40S ribosomal protein S12	RPS12	31.541	20403000	19	20.9311	21.7013	20.6728	20.9699	21.7685	20.9931
0.264566	-0.342133	J3KMX5;P62277	J3KMX5;P62277	40S ribosomal protein S13	RPS13	9.8039	4729400	6	22.4756	22.4039	22.0038	21.3298	21.5968	22.9303
1.5915	-1.65967	H3BNG3;H0YE27;H0YEN5;E9PPT0;E9PMM9;E9PQD7;P15880	H3BNG3;H0YE27;H0YEN5;E9PPT0;E9PMM9;E9PQD7;P15880	40S ribosomal protein S2	RPS2	10.174	14883000	6	23.8311	23.0486	22.7081	21.5698	20.9242	22.1149
0.753065	-0.979413	E5RIP1;E5RJX2;P60866;P60866-2	E5RIP1;E5RJX2;P60866;P60866-2	40S ribosomal protein S20	RPS20	9.0241	7164600	7	23.5971	22.2206	22.1237	22.3908	21.298	21.3144
0.835644	0.617074	P62081;B5MCP9	P62081;B5MCP9	40S ribosomal protein S7	RPS7	3.9519	42926000	13	22.0046	22.4044	22.0507	23.3672	22.6641	22.2796
0.442139	-0.686427	F8WD59;C9J9K3;A0A0C4DG17;P08865	F8WD59;C9J9K3;A0A0C4DG17;P08865	40S ribosomal protein SA	RPSA	5.7211	34604000	3	22.0273	24.0478	22.0898	22.1656	21.9578	21.9822
0.563657	0.579556	P60903	P60903	Protein S100-A10	S100A10	7.7431	103330000	10	21.3207	21.8931	22.0568	22.9729	22.4329	21.6034
1.35392	2.03469	P31949	P31949	Protein S100-A11;Protein S100-A11, N-terminally processed	S100A11	22.856	74835000	10	20.3573	20.6463	22.1896	22.4209	23.0322	23.8442
0.230776	0.293425	P82979;F8VS12;F8VZQ9;H0YHG0	P82979;F8VS12;F8VZQ9;H0YHG0	SAP domain-containing ribonucleoprotein	SARNP	11.434	10915000	5	21.365	22.0215	22.7671	21.9417	22.9091	22.1832
0.362192	-0.279905	P13521;C9JQI2	P13521;C9JQI2	Secretogranin-2;Secretoneurin;Manserin	SCG2	12.566	11877000	10	21.5546	21.976	22.4572	21.8722	21.9374	21.3385
0.855886	-1.00432	Q8WXD2;Q8WXD2-2	Q8WXD2	Secretogranin-3	SCG3	51.496	57176000	11	23.7233	24.2057	23.753	23.5388	23.2744	21.8558
0.315265	-0.34879	E5RJB8;E5RHU3;E7ESK6;E9PBI9;P34741	E5RJB8;E5RHU3;E7ESK6;E9PBI9;P34741	Syndecan;Syndecan-2	SDC2	1.9891	0	3	22.3274	22.6487	23.1576	23.1173	21.8763	22.0938
0.598528	-0.86267	G5EA09;O00560-3;O00560-2;O00560	G5EA09;O00560-3;O00560-2;O00560	Syntenin-1	SDCBP	2.2789	15237000	3	22.023	22.1208	23.8849	22.1964	21.8221	21.4221
0.276725	-0.352333	H0Y3T6;Q9BRK5-5;Q9BRK5-2;Q9BRK5-6;Q9BRK5	H0Y3T6;Q9BRK5-5;Q9BRK5-2;Q9BRK5-6;Q9BRK5	45 kDa calcium-binding protein	SDF4	12.061	4191300	4	23.1897	21.804	22.5634	22.4548	21.5317	22.5137
1.07846	3.65647	A0A024R6I7;P01009;A0A0G2JRN3;P01009-2;P01009-3;G3V2B9;G3V544;G3V5R8;G3V387;A0A0B4J278	A0A024R6I7;P01009;A0A0G2JRN3;P01009-2;P01009-3	Alpha-1-antitrypsin;Short peptide from AAT	SERPINA1	323.31	1930800000	143	22.5512	27.9568	24.5394	28.9764	28.2445	28.7959
0.0331496	-0.0979163	A0A2R8YD12;A0A024QZX5;A0A087X1N8;P35237;A0A2R8Y6A7	A0A2R8YD12;A0A024QZX5;A0A087X1N8;P35237;A0A2R8Y6A7	Serpin B6	SERPINB6	3.5239	2152100	5	22.1256	21.5362	22.5517	22.4326	23.3453	20.1418
0.687789	-0.463044	P50453;H7BXK7;C9J7N5;A0A1B0GU38;A0A0C4DGW9;P30740-2;P50452-2;P50452;P30740;O75830	P50453	Serpin B9	SERPINB9	2.0182	1856300	2	23.0552	22.5104	22.0997	22.2757	22.1633	21.8372
1.43043	-0.711745	P01008;Q8TCE1	P01008;Q8TCE1	Antithrombin-III	SERPINC1	6.8397	17634000	9	22.1366	22.6123	21.8364	21.5845	21.4285	21.4371
0.671538	-0.637087	P07093-2;P07093;P07093-3;C9JN98	P07093-2;P07093;P07093-3;C9JN98	Glia-derived nexin	SERPINE2	2.8686	26026000	1	23.1973	22.0094	22.1953	21.4001	22.1406	21.9499
0.907044	-0.888315	P36955;I3L4N7;I3L107;I3L4F9;I3L4Z0;CON__Q95121;I3L2R7;I3L425;I3L3Z3;I3L1U4	P36955	Pigment epithelium-derived factor	SERPINF1	169.82	1953700000	108	29.1907	28.3915	27.7223	27.4537	27.8754	27.3104
0.598059	0.752454	P05155-2;P05155;P05155-3;H9KV48;E9PGN7	P05155-2;P05155;P05155-3;H9KV48;E9PGN7	Plasma protease C1 inhibitor	SERPING1	8.1656	50401000	7	21.4716	22.2051	23.0451	22.978	22.4255	23.5756
0.192169	0.0664158	P50454;E9PK86;E9PMI5;E9PR70;E9PPV6;E9PJH8;E9PIG2;E9PRS3;E9PNX1;E9PLA6;E9PKH2;H0YEP8;E9PQ34	P50454;E9PK86;E9PMI5;E9PR70;E9PPV6;E9PJH8;E9PIG2;E9PRS3;E9PNX1	Serpin H1	SERPINH1	171.99	249480000	36	24.6723	24.8227	25.0866	24.963	24.8212	24.9966
0.0411	0.120737	A0A0C4DFV9;Q01105-3;Q01105-4;Q01105-2;Q01105;A0A087X027;P0DME0	A0A0C4DFV9;Q01105-3;Q01105-4;Q01105-2;Q01105;A0A087X027;P0DME0	Protein SET;Protein SETSIP	SET;SETSIP	33.287	99230000	14	22.1041	23.2122	25.4328	23.5856	24.102	23.4237
1.02489	-0.70642	P23246;P23246-2;H0Y9K7	P23246;P23246-2	Splicing factor, proline- and glutamine-rich	SFPQ	7.2717	20747000	11	22.6647	21.9367	22.5979	21.8798	21.9552	21.2449
0.11321	0.201281	Q8N474;Q6ZSL4	Q8N474;Q6ZSL4	Secreted frizzled-related protein 1	SFRP1	8.7605	72875000	17	22.542	24.3936	22.9574	23.0349	23.3541	24.1078
1.42893	-2.0446	Q5T123;Q9H299	Q5T123;Q9H299	SH3 domain-binding glutamic acid-rich-like protein 3	SH3BGRL3	1.9509	22590000	2	22.7865	24.3261	22.3297	21.0764	21.6007	20.6314
0.0414932	0.0872847	P63208;E7ERH2;F8W8N3;E5RJR5;P63208-2;E5RGM3	P63208;E7ERH2;F8W8N3;E5RJR5;P63208-2	S-phase kinase-associated protein 1	SKP1	9.2199	39524000	11	22.1428	22.8175	24.1897	23.9124	22.7665	22.7329
0.159546	-0.373293	F8VVM2;Q00325-2;Q00325	F8VVM2;Q00325-2;Q00325	Phosphate carrier protein, mitochondrial	SLC25A3	10.108	3185300	2	24.1588	22.3112	21.841	21.7855	21.9745	23.4311
0.0604065	0.0856024	O14745;J3QRP6;O14745-2	O14745;J3QRP6	Na(+)/H(+) exchange regulatory cofactor NHE-RF1	SLC9A3R1	18.408	30939000	12	21.8843	22.173	22.0241	23.0463	21.4231	21.8687
0.676674	-0.766544	A0A0A0MSC8;O75094-3;O75094;O75094-4;O75094-2	A0A0A0MSC8;O75094-3;O75094;O75094-4;O75094-2	Slit homolog 3 protein	SLIT3	4.3272	4340700	5	23.0889	22.7162	22.2487	21.0369	22.1726	22.5447
1.16559	-1.6055	J3QLI9;P62314	J3QLI9;P62314	Small nuclear ribonucleoprotein Sm D1	SNRPD1	10.319	27728000	9	21.4529	22.8825	23.6434	21.0351	21.21	20.9173
0.119592	0.266245	P62318-2;P62318	P62318-2;P62318	Small nuclear ribonucleoprotein Sm D3	SNRPD3	3.1046	10862000	2	23.0264	21.5379	24.1373	22.8234	23.7696	22.9072
0.727496	-0.30162	P04179-4;P04179-2;P04179;F5H3C5;F5H4R2;F5GYZ5;P04179-3;G8JLJ2;G5E9P6;F5GXZ9	P04179-4;P04179-2;P04179;F5H3C5;F5H4R2;F5GYZ5;P04179-3	Superoxide dismutase [Mn], mitochondrial	SOD2	10.665	16195000	7	22.5451	22.1049	22.5156	22.3253	21.8976	22.0379
0.932454	0.260444	P09486;F5GY03;E5RK62	P09486;F5GY03	SPARC	SPARC	172.63	2845400000	93	28.3759	28.3245	28.7042	28.8335	28.6981	28.6544
0.474538	-1.30621	Q14515-2;Q14515	Q14515-2;Q14515	SPARC-like protein 1	SPARCL1	10.782	4675800	7	22.7309	22.1163	22.8869	22.8627	21.9632	18.9895
0.0348321	-0.112102	P10451-4;P10451-5;P10451-2;P10451	P10451-4;P10451-5;P10451-2;P10451	Osteopontin	SPP1	3.1899	18269000	8	21.9627	23.0882	21.7375	24.0108	20.5606	21.8807
0.0734855	0.0889365	A0A0D9SF54;A0A0D9SGF6;Q13813-3;Q13813;Q13813-2	A0A0D9SF54;A0A0D9SGF6;Q13813-3;Q13813;Q13813-2	Spectrin alpha chain, non-erythrocytic 1	SPTAN1	4.7591	11149000	8	21.476	22.3854	22.6087	21.809	22.6587	22.2691
0.10258	0.128337	A0A087WUZ3;Q01082	A0A087WUZ3;Q01082	Spectrin beta chain, non-erythrocytic 1	SPTBN1	1.9974	6528200	2	22.2813	21.5601	22.919	22.0565	22.2882	22.8008
0.217681	-0.455655	H0YLA2;P37108	H0YLA2;P37108	Signal recognition particle 14 kDa protein	SRP14	2.014	4955800	4	22.8614	21.7533	21.8932	22.9392	20.3934	21.8083
1.01461	-0.686131	P49458;E9PE20;P49458-2	P49458;E9PE20;P49458-2	Signal recognition particle 9 kDa protein	SRP9	3.4536	28281000	8	23.1668	22.6578	23.2096	22.55	22.6253	21.8005
0.352787	0.669914	J3KTL2;Q07955;Q07955-3;Q07955-2;J3QQV5;J3KSW7;S4R3G0;J3KSR8;Q13242	J3KTL2;Q07955;Q07955-3;Q07955-2	Serine/arginine-rich splicing factor 1	SRSF1	5.9358	24021000	12	22.5683	20.9624	23.6429	23.2073	23.1696	22.8065
1.04849	-0.933905	P05455;E9PFL9;E7ERC4;E9PGX9	P05455;E9PFL9;E7ERC4	Lupus La protein	SSB	2.1302	9882900	3	22.5571	22.4326	23.2287	21.6671	22.4472	21.3025
0.857962	-2.65442	O76061	O76061	Stanniocalcin-2	STC2	1.8768	1679600	1	22.8386	23.8428	23.8169	22.8268	18.1418	21.5665
0.0692072	-0.137243	P31948;P31948-2;P31948-3;F5H783;F5GXD8;H0YGI8	P31948;P31948-2;P31948-3	Stress-induced-phosphoprotein 1	STIP1	22.702	78207000	33	22.8051	23.5035	25.1197	23.7629	23.4674	23.7863
0.0607969	-0.359724	A2A2D0;P16949;P16949-2	A2A2D0;P16949;P16949-2	Stathmin	STMN1	11.453	286150000	15	21.1246	26.3	26.1669	25.0924	21.8955	25.5246
0.689162	1.30648	E5RGX5;Q93045;Q93045-2	E5RGX5;Q93045;Q93045-2	Stathmin;Stathmin-2	STMN2	1.886	8798100	2	21.3434	22.3057	19.9777	22.5263	21.5799	23.4401
0.741775	-1.15119	P53999;D6RC37;D6R970	P53999;D6RC37;D6R970	Activated RNA polymerase II transcriptional coactivator p15	SUB1	4.3891	1327700	4	23.1198	23.5589	21.255	21.489	21.339	21.6521
0.0220705	0.0883141	P61956-2;P61956;A8MUA9;A8MU27;Q6EEV6;P55854;P55854-2	P61956-2;P61956;A8MUA9;A8MU27;Q6EEV6;P55854;P55854-2	Small ubiquitin-related modifier 2;Small ubiquitin-related modifier 4;Small ubiquitin-related modifier 3	SUMO2;SUMO3;SUMO4	4.2851	170500000	13	22.1293	22.3335	25.5776	24.7145	22.1786	23.4124
0.235986	0.302179	O60506-4;O60506-3;O60506-2;O60506;F6UXX1;B7Z645;O60506-5	O60506-4;O60506-3;O60506-2;O60506;F6UXX1;B7Z645;O60506-5	Heterogeneous nuclear ribonucleoprotein Q	SYNCRIP	7.3975	19862000	16	22.9957	22.2677	22.1091	22.2525	22.4266	23.6
0.515443	0.712384	A0A075B7D9;H3BPE7;P35637-2;P35637;Q92804-2;Q92804	A0A075B7D9;H3BPE7;P35637-2;P35637;Q92804-2;Q92804	RNA-binding protein FUS;TATA-binding protein-associated factor 2N	TAF15;FUS	2.224	3741600	1	21.907	21.5134	21.8664	23.1364	21.2908	22.9966
0.0145999	0.0287832	H0YCU9;Q01995	H0YCU9;Q01995	Transgelin	TAGLN	2.5499	9191000	4	22.9784	21.0733	21.7309	21.4536	21.8174	22.598
0.269395	-0.275721	X6RJP6;P37802;P37802-2	X6RJP6;P37802;P37802-2	Transgelin-2	TAGLN2	20.232	31412000	15	21.6297	22.2123	22.108	20.9729	22.1201	22.0299
1.31311	-1.11607	H7C5N2;C9J5W6;Q9UI15	H7C5N2;C9J5W6;Q9UI15	Transgelin-3	TAGLN3	10.984	15533000	9	22.5039	22.6881	23.0544	21.7779	22.1775	20.9428
1.10932	0.983906	F2Z393;P37837	F2Z393;P37837	Transaldolase	TALDO1	2.2651	45696000	4	21.6505	22.2903	21.5824	22.2424	23.4551	22.7774
0.361991	0.771428	K7EJ99;A0A0A0MSV7;K7EJM5;A0A087WX29;A0A1W2PNU8;A0A0A0N0M3;K7EN94;B1AKP7;G3V162;A0A087X260;A0A087WYY0;Q13148	K7EJ99;A0A0A0MSV7;K7EJM5;A0A087WX29;A0A1W2PNU8;A0A0A0N0M3;K7EN94;B1AKP7;G3V162;A0A087X260;A0A087WYY0;Q13148	TAR DNA-binding protein 43	TARDBP;TDP43	4.3525	29123000	11	22.8179	20.9513	21.887	21.8498	24.0662	22.0545
0.381729	-0.60301	P17987;F5H726;F5H676;F5H136;F5H282;E7EQR6;E7ERF2	P17987;F5H726;F5H676;F5H136;F5H282;E7EQR6;E7ERF2	T-complex protein 1 subunit alpha	TCP1	2.975	12538000	8	22.5549	23.7101	21.7356	22.0301	21.4993	22.6621
1.38668	-0.579735	P02787;H7C5E8;F8WCI6;C9JB55;F8WEK9;C9JVG0;F8WC57;CON__Q2HJF0	P02787	Serotransferrin	TF	323.31	528070000000	1661	36.7448	36.089	36.3965	35.8737	35.8799	35.7376
0.324096	0.10686	Q15582;H0Y8L3;S4R3C6;H0Y9D7;H0YAB8;H0Y8M8;D6RBX4;H0YAH8	Q15582;H0Y8L3	Transforming growth factor-beta-induced protein ig-h3	TGFBI	323.31	850580000	129	26.7587	26.3829	26.4503	26.7243	26.6901	26.4982
0.414833	0.438281	Q03167-2;Q03167	Q03167-2;Q03167	Transforming growth factor beta receptor type 3	TGFBR3	3.312	11549000	5	22.7087	21.5693	21.613	21.9052	22.5847	22.7158
0.345062	1.18397	Q5H9A7;P01033;H0Y789;Q5H9B5;Q5H9B4	Q5H9A7;P01033;H0Y789	Metalloproteinase inhibitor 1	TIMP1	64.366	438590000	37	21.8009	26.0766	25.9932	25.6863	26.1423	25.594
0.0142942	-0.0115414	P16035;B4DFW2;K7EIX4;K7EL90	P16035;B4DFW2	Metalloproteinase inhibitor 2	TIMP2	94.956	380090000	32	26.1414	25.3645	25.8235	25.9423	25.8713	25.481
0.529098	-0.498055	P29401;P29401-2;A0A0B4J1R6;E9PFF2;F8W888;F8WAX4	P29401;P29401-2;A0A0B4J1R6;E9PFF2	Transketolase	TKT	81.06	208870000	47	24.5486	24.7867	25.864	24.5463	24.7332	24.4257
0.292637	0.405354	Q9Y490	Q9Y490	Talin-1	TLN1	2.4307	0	1	21.3667	22.1936	22.495	22.9934	21.5401	22.7379
0.0165533	0.0269159	I3L0A0;Q13404-8;Q15819;Q13404;Q13404-7;Q13404-2;Q13404-1;E5RIF1;D6RG00;H0YBX6;G3V2F7;G3V113;A0A0A0MSL3;H0YBP9;Q13404-6	I3L0A0;Q13404-8;Q15819;Q13404;Q13404-7;Q13404-2;Q13404-1;E5RIF1;D6RG00;H0YBX6;G3V2F7;G3V113	Ubiquitin-conjugating enzyme E2 variant 1;Ubiquitin-conjugating enzyme E2 variant 2	TMEM189-UBE2V1;UBE2V1;UBE2V2	23.782	45214000	12	22.3116	22.0727	23.726	22.8262	22.422	22.9429
0.196	-0.240021	G5E972;P42167-3;P42167-2;P42167;P42166;H0YJH7	G5E972;P42167-3;P42167-2;P42167;P42166	Lamina-associated polypeptide 2, isoforms beta/gamma;Thymopoietin;Thymopentin;Lamina-associated polypeptide 2, isoform alpha;Thymopoietin;Thymopentin	TMPO	10.091	81423000	21	23.2773	23.5431	24.6586	23.9606	23.5467	23.2516
0.060179	-0.105545	P63313	P63313	Thymosin beta-10	TMSB10	1.9136	21300000	7	22.4355	22.8995	22.0125	21.6714	21.9227	23.4368
0.732942	1.4997	P62328	P62328	Thymosin beta-4;Hematopoietic system regulatory peptide	TMSB4X	11.345	197780000	9	21.5147	22.1131	22.435	22.5331	25.3135	22.7153
0.00927047	-0.0258077	E9PC84;P24821-4;P24821;F5H7V9;J3QSU6;P24821-6;P24821-5;P24821-2;P24821-3;H0YGZ3	E9PC84;P24821-4;P24821;F5H7V9;J3QSU6;P24821-6;P24821-5;P24821-2;P24821-3;H0YGZ3	Tenascin	TNC	10.362	35505000	8	21.662	20.6572	22.8044	20.8618	23.0196	21.1648
0.402858	-0.297064	P60174-1;P60174;P60174-4;U3KQF3;U3KPZ0;U3KPS5	P60174-1;P60174;P60174-4	Triosephosphate isomerase	TPI1	203.61	1591000000	104	27.8824	27.5996	28.5786	27.951	27.6085	27.6099
0.0829479	0.139517	Q9BW30	Q9BW30	Tubulin polymerization-promoting protein family member 3	TPPP3	15.929	2470900	2	23.1779	22.4433	22.1511	21.7445	22.9919	23.4545
0.064677	-0.146957	Q5W0H4;A0A0B4J2C3;P13693;J3KPG2;E9PJF7;P13693-2;Q56UQ5	Q5W0H4;A0A0B4J2C3;P13693	Translationally-controlled tumor protein	TPT1	4.7615	50139000	6	21.675	23.3401	22.0672	21.7177	23.4284	21.4954
0.149797	1.25282	H7BXY6;Q8NG11	H7BXY6;Q8NG11	Tetraspanin;Tetraspanin-14	TSPAN14	1.9977	3703100000	16	22.1919	28.4716	22.4504	21.4938	25.7595	29.6191
0.820306	1.87528	Q9H2G4	Q9H2G4	Testis-specific Y-encoded-like protein 2	TSPYL2	15.888	136290000	9	21.5639	23.007	20.7634	25.2671	22.5038	23.1893
0.903395	-1.61056	P02766;A0A087WT59;A0A087WV45	P02766;A0A087WT59;A0A087WV45	Transthyretin	TTR	323.31	44303000000	250	34.9924	33.0115	32.2098	31.8284	31.9288	31.6249
0.0494319	0.0707321	Q71U36-2;Q71U36;P68363;F5H5D3;Q9BQE3;P68363-2;P0DPH8;P0DPH7;P68366-2;P68366;A0A1W2PQM2;P0DPH7-2;Q6PEY2;F8VQQ4;F8VVB9;C9J2C0;Q9NY65-2;Q9NY65;F8VRZ4;F8VS66;F8VX09;F8VWV9;V9GZ17;C9JEV8;C9JDS9;C9JQ00;C9JJQ8;F8VRK0;A6NHL2-2;A6NHL2;C9K0S6;C9JDL2;F8VXZ7;F8W0F6	Q71U36-2;Q71U36;P68363;F5H5D3;Q9BQE3;P68363-2;P0DPH8;P0DPH7;P68366-2;P68366;A0A1W2PQM2;P0DPH7-2;Q6PEY2	Tubulin alpha-1A chain;Tubulin alpha-1B chain;Tubulin alpha-1C chain;Tubulin alpha-4A chain;Tubulin alpha-3E chain	TUBA1A;TUBA1B;TUBA1C;TUBA4A;TUBA3E	187.67	1802000000	115	27.2561	28.5163	27.2422	27.4997	28.2427	27.4843
0.633419	0.432291	Q5JP53;P07437;Q5ST81	Q5JP53;P07437;Q5ST81	Tubulin beta chain	TUBB	160.27	537320000	34	25.2854	26.1886	25.2936	26.1076	26.0719	25.8849
0.574488	1.16333	Q9BVA1;Q13885	Q9BVA1;Q13885	Tubulin beta-2B chain;Tubulin beta-2A chain	TUBB2B;TUBB2A	4.214	77826000	11	21.2432	21.9605	23.2211	24.6317	22.3031	22.9798
0.533957	1.03099	Q13509;A0A0B4J269;Q13509-2;G3V5W4;G3V2R8;G3V3R4;G3V2N6;G3V2A3;G3V3J6;G3V3W7;CON__ENSEMBL:ENSBTAP00000025008;Q9H4B7	Q13509;A0A0B4J269;Q13509-2	Tubulin beta-3 chain	TUBB3	17.922	87290000	24	21.3878	24.0211	23.7922	24.3309	23.9129	24.0503
0.341711	0.392454	P68371	P68371	Tubulin beta-4B chain	TUBB4B	125.68	1422600000	94	26.3542	27.928	27.2634	27.8084	27.5674	27.3471
0.36219	0.713849	Q9BUF5;K7ESM5;K7ES63	Q9BUF5;K7ESM5	Tubulin beta-6 chain	TUBB6	5.0869	42010000	7	22.2533	21.717	23.1066	24.3162	21.8364	23.0659
0.370453	0.344973	Q3ZCM7;A0A075B736;Q5SQY0	Q3ZCM7;A0A075B736;Q5SQY0	Tubulin beta-8 chain	TUBB8	1.9427	3255500	2	22.0882	23.3136	23.0023	23.0321	23.4043	23.0026
0.316024	0.584166	F8W1Q9;F8VS81;Q12792;Q12792-3	F8W1Q9;F8VS81;Q12792;Q12792-3	Twinfilin-1	TWF1	2.1962	769470	1	22.5379	22.577	20.468	22.3955	21.9611	22.9788
0.284632	1.03373	P10599;P10599-2	P10599;P10599-2	Thioredoxin	TXN	22.909	648890000	28	22.4804	26.4415	27.1287	26.5861	26.6139	25.9519
0.0617801	-0.143462	K7EJH3;A0A1B0GW87;K7EJM7;M0QYK5;M0R2N4;P0DN76;Q01081-3;Q8WU68-3;Q8WU68-2;Q8WU68;Q01081-2;Q01081	K7EJH3;A0A1B0GW87;K7EJM7;M0QYK5;M0R2N4;P0DN76;Q01081-3;Q8WU68-3;Q8WU68-2;Q8WU68;Q01081-2;Q01081	Splicing factor U2AF 35 kDa subunit;Splicing factor U2AF 26 kDa subunit	U2AF1L4;U2AF1	2.493	7408600	8	22.0392	21.918	22.3489	22.407	23.057	20.4117
0.0117109	0.0174987	K7ENG2;P26368-2;P26368	K7ENG2;P26368-2;P26368	Splicing factor U2AF 65 kDa subunit	U2AF2	9.9619	69966000	25	22.1656	23.492	23.6478	23.4125	22.9308	23.0147
0.214359	0.38887	P22314-2;P22314;Q5JRR6	P22314-2;P22314	Ubiquitin-like modifier-activating enzyme 1	UBA1	13.378	49478000	13	21.5855	23.3068	21.6823	22.9707	23.0488	21.7217
0.160813	-0.518473	J3QS39;J3QTR3;F5H6Q2;F5GYU3;F5H2Z3;F5H265;B4DV12;F5H388;F5H747;F5GXK7;J3QKN0;Q5PY61;Q96C32;P62987;P62979;P0CG47;P0CG48;M0R1V7;Q49A90;M0R1M6;M0R2S1;A0A2R8Y422;J3QSA3;F5GZ39	J3QS39;J3QTR3;F5H6Q2;F5GYU3;F5H2Z3;F5H265;B4DV12;F5H388;F5H747;F5GXK7;J3QKN0;Q5PY61;Q96C32;P62987;P62979;P0CG47;P0CG48;M0R1V7;Q49A90;M0R1M6;M0R2S1;A0A2R8Y422	Ubiquitin-60S ribosomal protein L40;Ubiquitin;60S ribosomal protein L40;Ubiquitin-40S ribosomal protein S27a;Ubiquitin;40S ribosomal protein S27a;Polyubiquitin-B;Ubiquitin;Polyubiquitin-C;Ubiquitin	UBB;RPS27A;UBC;UBA52	125.17	386850000	23	25.2797	23.3589	25.5639	25.388	25.0183	22.2409
0.427905	-0.722357	P61086-2;P61086-3;P61086	P61086-2;P61086-3;P61086	Ubiquitin-conjugating enzyme E2 K	UBE2K	1.9501	0	1	23.2542	22.6841	21.4402	20.8493	22.512	21.85
1.0369	-0.540899	P68036;P68036-3;P68036-2;A0A1B0GUS4	P68036;P68036-3;P68036-2	Ubiquitin-conjugating enzyme E2 L3	UBE2L3	9.2466	73011000	6	21.7894	22.5635	22.3423	21.5251	21.7963	21.7512
0.0779321	0.113586	F8VQQ8;P61088;Q5JXB2	F8VQQ8;P61088;Q5JXB2	Ubiquitin-conjugating enzyme E2 N;Putative ubiquitin-conjugating enzyme E2 N-like	UBE2N;UBE2NL	3.1194	58443000	9	21.6009	22.7642	22.7447	21.9101	23.0871	22.4534
0.513218	0.593189	X6REH9	X6REH9		UBE2W	1.8438	73404000	0	22.2258	21.2672	21.8808	21.7357	22.2408	23.1768
0.391192	-0.890535	A0A087WTZ5;E9PJ81;E9PRQ7;Q04323;Q04323-2	A0A087WTZ5;E9PJ81;E9PRQ7;Q04323;Q04323-2	UBX domain-containing protein 1	UBXN1	213.72	3219400	8	21.979	21.6929	22.2986	21.4591	22.5256	19.3143
0.0280417	0.0555255	P09936;D6RE83;D6R956;D6R974;D6RF53	P09936;D6RE83;D6R956;D6R974	Ubiquitin carboxyl-terminal hydrolase isozyme L1;Ubiquitin carboxyl-terminal hydrolase	UCHL1	52.128	542290000	40	24.9436	26.5434	26.9702	26.5829	26.3031	25.7377
0.0448906	0.0735022	P61960;H0Y614;P61960-2	P61960;H0Y614	Ubiquitin-fold modifier 1	UFM1	7.5345	45130000	6	22.9658	22.8813	22.5342	23.6103	23.1828	21.8086
0.337853	-0.500369	Q9NYU2-2;Q9NYU2	Q9NYU2-2;Q9NYU2	UDP-glucose:glycoprotein glucosyltransferase 1	UGGT1	2.2642	2201700	2	22.2617	23.2574	21.4172	21.895	21.2512	22.2889
0.114575	-0.251816	C9JWG0;C9JVG3;C9JQU9;C9JNZ1;A0A087WYS1;E7EUC7;Q16851-2;Q16851;F2Z3H1;C9JTZ5;C9JUW1	C9JWG0;C9JVG3;C9JQU9;C9JNZ1;A0A087WYS1;E7EUC7;Q16851-2;Q16851;F2Z3H1;C9JTZ5;C9JUW1	UTP--glucose-1-phosphate uridylyltransferase	UGP2	6.2471	11915000	5	21.0884	22.3471	23.2838	22.7965	22.0381	21.1293
0.381413	-0.54616	M0QZZ6;M0QZE0;G8JLK1;Q9NZ43-3;Q9NZ43-2;Q9NZ43	M0QZZ6;M0QZE0;G8JLK1;Q9NZ43-3;Q9NZ43-2;Q9NZ43	Vesicle transport protein USE1	USE1	2.6594	0	2	21.1989	22.6228	22.9708	21.8957	21.2028	22.0556
1.31823	0.946228	Q9P0L0;Q9P0L0-2;E5RK64;O95292-2;O95292	Q9P0L0;Q9P0L0-2;E5RK64;O95292-2;O95292	Vesicle-associated membrane protein-associated protein A;Vesicle-associated membrane protein-associated protein B/C	VAPA;VAPB	4.5167	33647000	8	20.9845	21.9672	21.4422	22.1983	22.2657	22.7686
0.423727	-0.975284	Q6EMK4	Q6EMK4	Vasorin	VASN	2.0897	13442000	2	21.6158	22.5635	23.4139	22.3649	22.4138	19.8886
0.20778	0.186591	P13611-2;P13611;E9PF17;P13611-4;P13611-3;P13611-5;D6RGZ6;Q86W61	P13611-2;P13611;E9PF17;P13611-4;P13611-3;P13611-5;D6RGZ6;Q86W61	Versican core protein	VCAN	98.663	898360000	73	25.7445	26.8844	26.2194	26.2686	26.6341	26.5054
0.0641368	0.159378	P18206-2;P18206;A0A096LPE1;P18206-3	P18206-2;P18206	Vinculin	VCL	13.132	51239000	13	21.4054	22.9389	24.2105	23.4722	23.1119	22.4489
0.228476	0.67379	P55072;C9JUP7;C9IZA5	P55072	Transitional endoplasmic reticulum ATPase	VCP	38.347	167880000	45	22.0545	24.0167	25.7863	25.1	24.9796	23.7993
0.265521	0.279559	P08670;B0YJC4;B0YJC5;A0A1B0GTT5;P17661;H7C5W5;E7EMV2;E7ESP9;P41219;P41219-2;Q16352;P07197-2;P07197;A0A1B0GVG8;F8W835;P07196;P12036-2;P12036	P08670;B0YJC4	Vimentin	VIM	129.46	977930000	68	26.4089	26.186	27.472	26.8168	27.2472	26.8416
0.252588	0.319914	P23381-2;P23381;H0YJP3;G3V3H8;G3V3Y5;G3V277	P23381-2;P23381;H0YJP3	Tryptophan--tRNA ligase, cytoplasmic;T1-TrpRS;T2-TrpRS	WARS	10.359	48404000	15	22.5348	21.8703	22.2872	21.6514	22.8048	23.196
0.497052	0.711989	O14980;C9JKM9;H7BZC5;C9IZS4;C9JQ02;C9JV99;C9J673	O14980;C9JKM9	Exportin-1	XPO1	4.5695	4493600	4	20.6638	22.2794	22.5405	22.6445	22.1253	22.8498
0.84534	-1.27017	P13010;C9JZ81	P13010;C9JZ81	X-ray repair cross-complementing protein 5	XRCC5	19.122	9905400	10	22.0211	22.806	22.4843	22.481	20.4129	20.6069
0.32572	-0.60111	B1AHC9;P12956;P12956-2	B1AHC9;P12956;P12956-2	X-ray repair cross-complementing protein 6	XRCC6	10.483	15242000	12	22.3519	22.4435	22.5026	21.2437	23.334	20.9169
0.670352	-1.50429	H0Y449;P67809;A0A0D9SEI8;P16989-2;P16989-3;P16989;C9J5V9;Q9Y2T7	H0Y449;P67809;A0A0D9SEI8;P16989-2;P16989-3;P16989	Nuclease-sensitive element-binding protein 1;Y-box-binding protein 3	YBX1;YBX3	53.216	63705000	17	22.2849	24.0923	24.5861	23.5985	21.6884	21.1635
0.136091	-0.160676	P31946-2;P31946;Q4VY20;Q4VY19;A0A0J9YWE8;A0A0J9YWZ2	P31946-2;P31946	14-3-3 protein beta/alpha;14-3-3 protein beta/alpha, N-terminally processed	YWHAB	89.506	214760000	46	25.0527	24.8509	25.2981	24.1826	24.9132	25.6239
0.0700091	-0.12483	P62258;P62258-2;K7EIT4;B4DJF2;I3L3T1;K7EM20;I3L0W5	P62258;P62258-2	14-3-3 protein epsilon	YWHAE	323.31	2628900000	154	27.7268	28.4581	29.7072	28.7591	28.7197	28.0389
0.125135	-0.182863	P61981;P31947-2;P31947	P61981	14-3-3 protein gamma;14-3-3 protein gamma, N-terminally processed	YWHAG	146.38	326940000	43	24.9713	25.0822	26.6031	25.5003	25.4227	25.1851
0.0836278	0.0739829	Q04917;A2IDB2	Q04917;A2IDB2	14-3-3 protein eta	YWHAH	9.5538	50101000	19	22.115	22.6545	23.1722	22.7002	22.6116	22.8517
0.0340186	0.0469824	P27348;E9PG15	P27348;E9PG15	14-3-3 protein theta	YWHAQ	323.31	472620000	60	25.1355	25.9447	26.5526	25.9374	26.3027	25.5335
0.404725	-0.387716	P63104;E7EX29;B0AZS6;P63104-2;B7Z2E6;H0YB80;E7ESK7;E5RIR4;E9PD24;E7EVZ2;E5RGE1	P63104;E7EX29;B0AZS6;P63104-2;B7Z2E6;H0YB80	14-3-3 protein zeta/delta	YWHAZ	323.31	2420500000	95	28.3922	28.5424	29.6051	28.7131	28.427	28.2364
0.0327657	-0.0743605	Q4KWH8-2	Q4KWH8-2			2.6954	0	3	21.3394	22.8516	22.5781	21.3324	23.3614	21.8522
0.092632	0.294788	Q96MC5-2	Q96MC5-2			1.771	35909000	9	21.0986	24.2245	21.9766	21.6898	22.5704	23.9239
