# Supplementary material for: Extracellular LGALS3BP regulates neural progenitor position and relates to human cortical complexity
Source: Nat Commun. 2021 Nov 2;12:6298. doi: 10.1038/s41467-021-26447-w (PMC8564519; doi:10.1038/s41467-021-26447-w)
Supplement: Supplementary file 8 — Supplementary Data 4. [file 41467_2021_26447_MOESM8_ESM.xlsx]

## Sheet: LGALS3BP_Guides_Offtargets
Chromosome	start	end	strand	MM	target_seq	PAM	alignment	position	gene name
chr17	78972233	78972255	-	0	AGTTCAACCTGTCCCTGTAC	TGG	||||||||[||||||||||||]PAM	Exonic	LGALS3BP
SCREENED OFF TARGETS
chr3	9923953	9923975	+	4	ACTTCGGCCTCTCCCTGTAC	TGG	|-|||--|[||-|||||||||]PAM	Exonic	IL17RC
chr16	16111373	16111395	+	4	AGGTCAAGCTTTCCGTGTAC	TGG	||-||||-[||-|||-|||||]PAM	Exonic	ABCC1
chr11	66424896	66424918	+	4	ACTCCAACCTGTCCCTGTCA	GGG	|-|-||||[||||||||||--]PAM	Exonic	NPAS4
chr5	141476844	141476866	+	4	TCTTCAACCAGTCCTTGTAC	CGG	--||||||[|-||||-|||||]PAM	Exonic	PCDHGC3
	gene id		PCR primers for amplification/sequnecing of genomic regions (5' to 3')					Size of amplified product
	ENSG00000108679		FWD: ATCACCCTGTCGTCAGTCAAGTGCTTCC REV: TGATAGACCAGTTGTGACTTCCGTGCACTCC
SCREENED OFF TARGETS
	ENSG00000163702		FWD: AATAGCTCTTCTCCGACCACACACTAGG REV: CCCATCATCATCTTCCCACTCCTC					675 bp
	ENSG00000103222		FWD: TCTCGAAGTCTCTACCTCAGTTGATC REV: TTTCTGGGTTTGGCTTGGTTTGG					592 bp
	ENSG00000174576		FWD: TCTCCAGTCAAGCAGAGTTTCTTCCAC REV: GAACTTGGCTCTGGAGTTGATGC					520 bp
	ENSG00000240184		FWD: CCCTACCCAGGAAATGAAATTGGAG REV: TCATTCACATCCACAACCTCCACC					636 bp
Targetted Oligo Sequnce 5' to 3'
TGGAGAAGATCCGCTTCCCCATGATGCTCCCTGAGGAGCTCTTTGAGCTGCAGTTTAACCTGTCACTGTACTGGAGCCACAAGGCCCTGTTCCAGAAGAAGACTCTGCAGGCCCTGGAATTCCACACTGTGCCCTTCCA
	Silent changed: from C to T to create MseI restriction site for screening and create a mismatch to the guide used
	Silent Change to destroy PAM for other Guides and to create a mismatch for the guide used
	TGG is PAM
	The bold bp are where the guide binds

## Sheet: E370K_cDNA sequence
cDNA sequence results
E370K- Allele 1
ATGACCCCTCCGAGGCTCTTCTGGGTGTGGCTGCTGGTTGCAGGAACCCAAGGCGTGAACGATGGTGACATGCGGCTGGCCGATGGGGGCGCCACCAACCAGGGCCGCGTGGAGATCTTCTACAGAGGCCAGTGGGGCACTGTGTGTGACAACCTGTGGGACCTGACTGATGCCAGCGTCGTCTGCCGGGCCCTGGGCTTCGAGAACGCCACCCAGGCTCTGGGCAGAGCTGCCTTCGGGCAAGGATCAGGCCCCATCATGCTGGATGAGGTCCAGTGCACGGGAACCGAGGCCTCACTGGCCGACTGCAAGTCCCTGGGCTGGCTGAAGAGCAACTGCAGGCACGAGAGAGACGCTGGTGTGGTCTGCACCAATGAAACCAGGAGCACCCACACCCTG…
E370K- Allele 2
ATGACCCCTCCGAGGCTCTTCTGGGTGTGGCTGCTGGTTGCAGGAACCCAAGGCGTGAACGATGGTGACATGCGGCTGGCCGATGGGGGCGCCACCAACCAGGGCCGCGTGGAGATCTTCTACAGAGGCCAGTGGGGCACTGTGTGTGACAACCTGTGGGACCTGACTGATGCCAGCGTCGTCTGCCGGGCCCTGGGCTTCGAGAACGCCACCCAGGCTCTGGGCAGAGCTGCCTTCGGGCAAGGATCAGGCCCCATCATGCTGGATGAGGTCCAGTGCACGGGAACCGAGGCCTCACTGGCCGACTGCAAGTCCCTGGGCTGGCTGAAGAGCAACTGCAGGCACGAGAGAGACGCTGGTGTGGTCTGCACCAATGAAACCAGGAGCACCCACACCCTG…

## Sheet: Y366Lfs_cDNA sequence
cDNA sequence results
Y366Lfs- Allele 1
ATGACCCCTCCGAGGCTCTTCTGGGTGTGGCTGCTGGTTGCAGGAACCCAAGGCGTGAACGATGGTGACATGCGGCTGGCCGATGGGGGCGCCACCAACCAGGGCCGCGTGGAGATCTTCTACAGAGGCCAGTGGGGCACTGTGTGTGACAACCTGTGGGACCTGACTGATGCCAGCGTCGTCTGCCGGGCCCTGGGCTTCGAGAACGCCACCCAGGCTCTGGGCAGAGCTGCCTTCGGGCAAGGATCAGGCCCCATCATGCTGGATGAGGTCCAGTGCACGGGAACCGAGGCCTCACTGGCCGACTGCAAGTCCCTGGGCTGGCTGAAGAGCAACTGCAGGCACGAGAGAGACGCTGGTGTGGTCTGCACCAATGAAACCAGGAGCACCCACACCCTG…
Y366Lfs- Allele 2
ATGACCCCTCCGAGGCTCTTCTGGGTGTGGCTGCTGGTTGCAGGAACCCAAGGCGTGAACGATGGTGACATGCGGCTGGCCGATGGGGGCGCCACCAACCAGGGCCGCGTGGAGATCTTCTACAGAGGCCAGTGGGGCACTGTGTGTGACAACCTGTGGGACCTGACTGATGCCAGCGTCGTCTGCCGGGCCCTGGGCTTCGAGAACGCCACCCAGGCTCTGGGCAGAGCTGCCTTCGGGCAAGGATCAGGCCCCATCATGCTGGATGAGGTCCAGTGCACGGGAACCGAGGCCTCACTGGCCGACTGCAAGTCCCTGGGCTGGCTGAAGAGCAACTGCAGGCACGAGAGAGACGCTGGTGTGGTCTGCACCAATGAAACCAGGAGCACCCACACCCTG…
