# Supplementary material for: Extracellular LGALS3BP regulates neural progenitor position and relates to human cortical complexity
Source: Nat Commun. 2021 Nov 2;12:6298. doi: 10.1038/s41467-021-26447-w (PMC8564519; doi:10.1038/s41467-021-26447-w)
Supplement: Supplementary file 9 — Supplementary Data 5. [file 41467_2021_26447_MOESM9_ESM.xlsx]

## Sheet: Sheet1
The iPSC colonies were screened using the protocol by Yusa K[74] with the following primers:
FWD 5’ ATCACCCTGTCGTCAGTCAAGTGCTTCC 3’
REV 5’ TGATAGACCAGTTGTGACTTCCGTGCACTCC 3’.
Generation of the two mutant variants of LGALS3BP was done with the Q5® Site-Directed Mutagenesis Kit (BioLabs). The primers used were the following:
E370K-LGALS3BP:
FW: CTGGAGCCACAAGGCCCTGTT
RV:TACAGGGACAGGTTGAACTG
E294K-LGALS3BP:
FW: GACGCAGGCCAAGGCCTGGCC
RV: AAGGCCTCGAAGTTCCAGGCC
