# Supplementary material for: Extracellular LGALS3BP regulates neural progenitor position and relates to human cortical complexity
Source: Nat Commun. 2021 Nov 2;12:6298. doi: 10.1038/s41467-021-26447-w (PMC8564519; doi:10.1038/s41467-021-26447-w)
Supplement: Supplementary file 10 — Supplementary Data 6. [file 41467_2021_26447_MOESM10_ESM.xlsx]

## Sheet: Fig. 1a
	PAX6				LGALS3BP				HOPX				EOMES
17d	787.386	611.654	711.927		451.017	382.37	627.563		31.1415	50.2632	69.5398		25.9996	15.1129	3.8386
23d	3375.24	3231.38	2383.13		423.524	517.484	325.798		96.6479	77.1007	34.1584		77.7743	40.7914	54.3839
40d	3316.66	3788.22	4967.35		1810.96	1314.71	922.49		76.1208	168.646	125.29		85.2119	177.429	128.627
70d	3729.26	3393.02	4958.44		2243.75	1337.97	1386.23		154.669	62.8562	256.422		333.448	120.954	893.237
120d	4355.56	3092.97	3533.71		1335.06	2706.61	2198.53		2092.57	1738.1	1970.98		1356.34	1912.05	2099.82
140d	3598.65	3300.7	3492.82		1059	1560.56	1606.18		1702.91	1433.29	1045.2		2573.92	2406.4	2148.69
158d	4006.57	7330.62	3608.91		1510.08	995.454	1457.42		1557.76	1848.52	1004.25		824.088	2473.36	998.747
Statistical analysis was performed using two-way Anova followed by Tukey’s multiple comparison test

## Sheet: Fig.2b
% of parental populations
CTRL	E370K	Y366Lfs
30.4	20.3	14.7
9.4	13.1	27.1
34	14.4	14.4
30.4	20.3	14.7
9.4	13.1	27.1
34	14.4	14.4
18	36.6	44
34	34	27
	18.6	30
z-scores were generated from the above normalized numbers using the STANDARDIZE formulat from excel function where the ctrl mean and stadard deviation were used

## Sheet: Fig.2c
% of parental populations
CTRL	E370K	Y366Lfs
9.8	13.3	9.8
15	10.3	12.6
12.5	15.2	12.6
9.8	13.3	9.8
15	10.3	12.6
12.5	15.2	12.6
15.5	14.3	10.4
10	20.2	22.6
z-scores were generated from the above normalized numbers using the STANDARDIZE formulat from excel function where the ctrl mean and stadard deviation were used

## Sheet: Fig.2g
Ph3+ cells raw numbers				ventricular length				normalized data
CTRL	E370K	Y366Lfs		CTRL	E370K	Y366Lfs		CTRL	E370K	Y366Lfs
6	33	4		437.545	490.463	128.469		0.013713	0.067283	0.031136
2	14	2		94.767	187.858	129.044		0.021104	0.074524	0.015499
16	18	6		326.137	443.471	439.719		0.049059	0.040589	0.013645
0	53	7		1026.65	779.28	353.216		0	0.068011	0.019818
6	31	16		174.092	339.514	367.169		0.034465	0.091307	0.043577
6	27	24		184.189	485.181	901.474		0.032575	0.055649	0.026623
0	21	17		553.147	296.003	533.772		0	0.070945	0.031849
0	7	27		540.26	183.563	428.995		0	0.038134	0.062938
0	16	19		510.11	263.484	844.433		0	0.060725	0.0225
0	13	6		455.994	401.161	192.942		0	0.032406	0.031097
5	23	9		240.401	656.653	210.189		0.020799	0.035026	0.042819
3	14	21		151.63	259.494	495.096		0.019785	0.053951	0.042416
2	6	10		943.635	203.826	420.051		0.002119	0.029437	0.023807
7	14	11		252.318	282.636	426.611		0.027743	0.049534	0.025785
6	25	8		101.917	403.124	279.005		0.058871	0.062016	0.028673
2	29	20		286.436	837.154	399.389		0.006982	0.034641	0.050076
2	8	24		289.493	165.114	497.948		0.006909	0.048451	0.048198
3	11	9		200.406	218.712	560.98		0.01497	0.050294	0.016043
1	12	7		87.028	273.902	163.855		0.011491	0.043811	0.042721
5	16	17		125.585	221.683	542.934		0.039814	0.072175	0.031311
	21	19			266.187	282.279			0.078892	0.067309
	34				485.774				0.069991
	25				327.112				0.076426
z-scores were generated from the above normalized numbers using the STANDARDIZE formulat from excel function where the ctrl mean and stadard deviation were used
statistical analysis was performed with Mann Whitney test in Graphpad Prism

## Sheet: Fig.2h
Ph3+ cells raw numbers				ventricular length				normalized data
CTRL	E370K	Y366Lfs		CTRL	E370K	Y366Lfs		CTRL	E370K	Y366Lfs
3	2	0		437.545	490.463	128.469		0.006856	0.004078	0
1	3	0		94.767	187.858	129.044		0.010552	0.01597	0
7	3	0		326.137	443.471	439.719		0.021463	0.006765	0
0	2	2		1026.65	779.28	353.216		0	0.002566	0.005662
4	5	1		174.092	339.514	367.169		0.022976	0.014727	0.002724
7	3	2		184.189	485.181	901.474		0.038004	0.006183	0.002219
0	7	2		553.147	296.003	533.772		0	0.023648	0.003747
0	1	2		540.26	183.563	428.995		0	0.005448	0.004662
0	2	1		510.11	263.484	844.433		0	0.007591	0.001184
0	2	1		455.994	401.161	192.942		0	0.004986	0.005183
0	1	0		240.401	656.653	210.189		0	0.001523	0
1	4	0		151.63	259.494	495.096		0.006595	0.015415	0
1	3	2		943.635	203.826	420.051		0.00106	0.014718	0.004761
1	3	4		252.318	282.636	426.611		0.003963	0.010614	0.009376
0	3	5		101.917	403.124	279.005		0	0.007442	0.017921
2	3	3		286.436	837.154	399.389		0.006982	0.003584	0.007511
0	2	1		289.493	165.114	497.948		0	0.012113	0.002008
2	1	1		200.406	218.712	560.98		0.00998	0.004572	0.001783
0	1	0		87.028	273.902	163.855		0	0.003651	0
5	2	1		125.585	221.683	542.934		0.039814	0.009022	0.001842
	0	1			266.187	282.279			0	0.003543
	3				485.774				0.006176
	5				327.112				0.015285
z-scores were generated from the above normalized numbers using the STANDARDIZE formulat from excel function where the ctrl mean and stadard deviation were used

## Sheet: Fig.2l
CTRL	E370K	Y366L
0.269532	0.343854	0.196437
0.059117	0.348756	0.308216
0.143299	0.162675	0.363561
0.055721	0.567016	0.454191
0.088307	0.445577	0.262284
0.168381	0.26452	0.264587
0.226458	0.231558	0.424344
0.200906	0.364144	0.398676
0.233463	0.441178	0.304928
	0.205345
	0.622543
	0.462295
	0.413867
	0.380345
	0.207855
	0.40051
z-scores were generated from the above numbers using the STANDARDIZE formulat from excel function where the ctrl mean and stadard deviation were used
statistical analysis was performed with Mann Whitney test in Graphpad Prism

## Sheet: Fig.2p
	% of ventricles with non delaminated HOPX+ cells			% of ventricles with delaminated HOPX+ cells
CTRL	31.25			68.75
E370K	68.75			31.25
Y366Lfs	75			25
statistical analysis was performed with exact binomial test using as expected values the ctrl in Graphpad Prism

## Sheet: Fig.3i
	AJ integrity intact			AJ integrity patchy
CTRL		26			10
LGALS3BP		16			42
statistical analysis was performed with exact binomial test in Graphpad Prism

## Sheet: Fig.3y
CTRL	E370K	Y366L
6.1754	19.0108	19.0608
4.5032	13.8384	8.4306
3.8376	14.8034	6.528
3.486	11.2886	26.1434
6.624	17.1036	12.6394
4.5366	10.0318	62.489
9.5322	6.3726	15.2122
4.9354	11.0026	19.4352
6.3506	16.049	7.5624
6.353	6.4572	8.347
3.865	19.204	9.6752
6.045	8.9574	12.0006
4.7576	4.638	18.0116
4.3022	11.125	12.2242
4.99	8.407	16.603
7.9748	6.64	12.5424
	9.7832	18.8444
	5.2778	26.9764
	21.1244	14.779
	10.8326	17.8432
	26.8808	31.81
	13.0494
	25.1168
	23.5576
	10.0256
	14.2902
z-scores were generated from the above numbers using the STANDARDIZE formulat from excel function where the ctrl mean and stadard deviation were used
statistical analysis was performed with Mann Whitney test in Graphpad Prism

## Sheet: Fig.3z
CTRL	E370K	Y366L
0.028621	0.035765	0.081123
0.013863	0.019508	0.012118
0.112641	0.039214	0.024075
0.011695	0.021171	0.041239
0.009794	0.043534	0.048665
0.007606	0.045818	0.009732
0.03192	0.042415	0.022189
0.013687	0.023391	0.017353
0.008111	0.04418	0.037329
0.006435	0.030815	0.015885
0.026088	0.011942	0.062971
0.015812	0.029147	0.015012
0.009016	0.033615	0.041056
0.055227	0.038211	0.029466
0.024214	0.207936	0.051461
0.00895	0.073511	0.029086
0.017034	0.049266
0.01159	0.036928
0.055251	0.033993
0.017012
0.007502
0.033789
0.012432
0.016122
z-scores were generated from the above numbers using the STANDARDIZE formulat from excel function where the ctrl mean and stadard deviation were used
statistical analysis was performed with Mann Whitney test in Graphpad Prism

[truncated: 34 more sheets: Fig.3aa, Fig.3ab, Fig.3ac, Fig.5d, Fig.5g, Fig.5j, Fig.6e, Fig.6j, Fig.6o, Fig.6x, Fig.7e, Fig.7n, Fig.7w, Fig.8h, Fig.8n, Extended Data Fig.1c, Extended Data Fig.2j, Extended Data Fig.2q, Extended Data Fig.2y, Extended Data Fig.2ac …]
