# Supplementary material for: Extracellular LGALS3BP regulates neural progenitor position and relates to human cortical complexity
Source: Nat Commun. 2021 Nov 2;12:6298. doi: 10.1038/s41467-021-26447-w (PMC8564519; doi:10.1038/s41467-021-26447-w)
Supplement: Supplementary file 11 — Source Data. [file 41467_2021_26447_MOESM11_ESM.xlsx]

## Sheet: Figure 8 b
	Exosomes isolated from SH-SY5Y cells upon LGAKS3BP variants electroporation
		anti-LGALS3BP					anti-CD81					anti-HA
	Exosomes isolated from control cerebral organoids
	anti-CD81			anti-LGALS3BP			Ladder
	Legend: Uncropped blots that are shown in Fig.8b are illustrated in the Source Data File. These blots represent western blot analysis for the expression levels of HA, LGALS3BP or CD81 antibodies performed in protein extracts isolated from EVs derived from control COs or SH-SY5Y cells upon electroporation of HA, HA-LGALS3BP, HA-E370K or HA-E294K

## Sheet: Fig2b,c, Extended Data Fig2x
	Principle for gating strategy for all FACS data presented in Figu2b,c and Extended Data Fig2x
	Panel P1 indicates strategy for excluding cell debris
	Panel single cells indicated gating to collect single cells
	Legend: Gating strategy SSC-A/FSC-A gates were done to exclude cell debris and FSC-W/FSC-A to collect single cells. The boundary between positive and negative staining cells was set according to the isotype control of each staining which is included in the respective figure panels
